# Supplementary material
Source: PubMed Central journal article supplement (PMC8881885)
Supplement: mmc4.pdf [file mmc4.pdf]

We gratefully acknowledge the following Authors from the Originating laboratories responsible for obtaining the specimens, as well as the Submitting laboratories where the genome data were generated and shared via GISAID, on which this research is based.

All Submitters of data may be contacted directly via [www.gisaid.org](http://www.gisaid.org)

Authors are sorted alphabetically.

| Accession ID                                                                                                                                                                                                                                                  | Originating Laboratory                                                                              | Submitting Laboratory                                                                                                             | Authors                                                                                                                                                                                                                                                                                                                                                                                                                                                                                                                                                                                                                                                                                                                                                                                                                                                                                                                                                                                                                                                                                                                                                                                                                                                                                                                                                                                                                                                                                                                                                                                                                                                                                       |
|---------------------------------------------------------------------------------------------------------------------------------------------------------------------------------------------------------------------------------------------------------------|-----------------------------------------------------------------------------------------------------|-----------------------------------------------------------------------------------------------------------------------------------|-----------------------------------------------------------------------------------------------------------------------------------------------------------------------------------------------------------------------------------------------------------------------------------------------------------------------------------------------------------------------------------------------------------------------------------------------------------------------------------------------------------------------------------------------------------------------------------------------------------------------------------------------------------------------------------------------------------------------------------------------------------------------------------------------------------------------------------------------------------------------------------------------------------------------------------------------------------------------------------------------------------------------------------------------------------------------------------------------------------------------------------------------------------------------------------------------------------------------------------------------------------------------------------------------------------------------------------------------------------------------------------------------------------------------------------------------------------------------------------------------------------------------------------------------------------------------------------------------------------------------------------------------------------------------------------------------|
| EPI_ISL_3638763                                                                                                                                                                                                                                               | AREA DE SALUD ALAJUELITA                                                                            | Incienza, Instituto Costarricense de Investigación y Enseñanza en Nutrición y Salud                                               | Adriana Godínez; Claudio Soto-Garita; Estela Cordero; Francisco Duarte; Hebleen Porras; José Luis Vargas; Mariela Gutiérrez & Joselyn Prado; Melany Calderón                                                                                                                                                                                                                                                                                                                                                                                                                                                                                                                                                                                                                                                                                                                                                                                                                                                                                                                                                                                                                                                                                                                                                                                                                                                                                                                                                                                                                                                                                                                                  |
| EPI_ISL_4258611                                                                                                                                                                                                                                               | AREA DE SALUD BELEN-FLORES - CLINICA DR. JORGE VOLIO                                                | Incienza, Instituto Costarricense de Investigación y Enseñanza en Nutrición y Salud                                               | Adriana Godínez; Claudio Soto-Garita; Estela Cordero; Francisco Duarte; Hebleen Porras; José Luis Vargas; Mariela Gutiérrez & Joselyn Prado; Melany Calderón                                                                                                                                                                                                                                                                                                                                                                                                                                                                                                                                                                                                                                                                                                                                                                                                                                                                                                                                                                                                                                                                                                                                                                                                                                                                                                                                                                                                                                                                                                                                  |
| EPI_ISL_3298319                                                                                                                                                                                                                                               | AREA DE SALUD GOLFITO                                                                               | Incienza, Instituto Costarricense de Investigación y Enseñanza en Nutrición y Salud                                               | Adriana Godínez; Claudio Soto-Garita; Estela Cordero; Francisco Duarte; Hebleen Porras; Joselyn Prado & Yendry Ramirez; José Luis Vargas; Mariela Gutiérrez; Melany Calderón                                                                                                                                                                                                                                                                                                                                                                                                                                                                                                                                                                                                                                                                                                                                                                                                                                                                                                                                                                                                                                                                                                                                                                                                                                                                                                                                                                                                                                                                                                                  |
| EPI_ISL_3298366, EPI_ISL_4601196                                                                                                                                                                                                                              | AREA DE SALUD LA CRUZ                                                                               | Incienza, Instituto Costarricense de Investigación y Enseñanza en Nutrición y Salud                                               | Adriana Godínez; Claudio Soto-Garita; Estela Cordero; Francisco Duarte; Hebleen Porras; Joselyn Prado & Adriana Bermudez Espinoza; Joselyn Prado & Adriana Bermúdez; José Luis Vargas; Mariela Gutiérrez; Melany Calderón                                                                                                                                                                                                                                                                                                                                                                                                                                                                                                                                                                                                                                                                                                                                                                                                                                                                                                                                                                                                                                                                                                                                                                                                                                                                                                                                                                                                                                                                     |
| EPI_ISL_3948477                                                                                                                                                                                                                                               | AREA DE SALUD MATA REDONDA HOSPITAL CLINICA DR. MORENO CAÑAS                                        | Incienza, Instituto Costarricense de Investigación y Enseñanza en Nutrición y Salud                                               | Adriana Godínez; Claudio Soto-Garita; Estela Cordero; Francisco Duarte; Hebleen Porras; Joselyn Prado & Ricardo González; José Luis Vargas; Mariela Gutiérrez; Melany Calderón                                                                                                                                                                                                                                                                                                                                                                                                                                                                                                                                                                                                                                                                                                                                                                                                                                                                                                                                                                                                                                                                                                                                                                                                                                                                                                                                                                                                                                                                                                                |
| EPI_ISL_4258643                                                                                                                                                                                                                                               | AREA DE SALUD OREAMUNO-PACAYAS-TIERRA BLANCA                                                        | Incienza, Instituto Costarricense de Investigación y Enseñanza en Nutrición y Salud                                               | Adriana Godínez; Claudio Soto-Garita; Estela Cordero; Francisco Duarte; Hebleen Porras; Joselyn Prado & Carolina Loria Acosta; José Luis Vargas; Mariela Gutiérrez; Melany Calderón                                                                                                                                                                                                                                                                                                                                                                                                                                                                                                                                                                                                                                                                                                                                                                                                                                                                                                                                                                                                                                                                                                                                                                                                                                                                                                                                                                                                                                                                                                           |
| EPI_ISL_3298323                                                                                                                                                                                                                                               | AREA DE SALUD SIQUIRRES                                                                             | Incienza, Instituto Costarricense de Investigación y Enseñanza en Nutrición y Salud                                               | Adriana Godínez; Claudio Soto-Garita; Estela Cordero; Francisco Duarte; Hebleen Porras; Joselyn Prado & Ileana Chaves; José Luis Vargas; Mariela Gutiérrez; Melany Calderón                                                                                                                                                                                                                                                                                                                                                                                                                                                                                                                                                                                                                                                                                                                                                                                                                                                                                                                                                                                                                                                                                                                                                                                                                                                                                                                                                                                                                                                                                                                   |
| EPI_ISL_3905328, EPI_ISL_3905329, EPI_ISL_3905352, EPI_ISL_4080668, EPI_ISL_4261435                                                                                                                                                                           | AUSTRAL-omics, UACH                                                                                 | AUSTRAL-omics, UACH                                                                                                               | Andrea Silva; Carolina Encina; Cristian Molina; Daniela Plaza; Luis Guzmán; Suany Quesada                                                                                                                                                                                                                                                                                                                                                                                                                                                                                                                                                                                                                                                                                                                                                                                                                                                                                                                                                                                                                                                                                                                                                                                                                                                                                                                                                                                                                                                                                                                                                                                                     |
| EPI_ISL_2965630, EPI_ISL_2965636, EPI_ISL_3047463, EPI_ISL_3047491, EPI_ISL_3047534                                                                                                                                                                           | AZDelta                                                                                             | AZ Delta Medical Laboratories in Roeselare, Belgium                                                                               | Dieter De Smet; Geert Martens; Merijn Vanhee; on behalf of AZ Delta COVID-19 Genomics core (member of Genomic surveillance of SARS-CoV-2 in Belgium network)                                                                                                                                                                                                                                                                                                                                                                                                                                                                                                                                                                                                                                                                                                                                                                                                                                                                                                                                                                                                                                                                                                                                                                                                                                                                                                                                                                                                                                                                                                                                  |
| EPI_ISL_3852430, EPI_ISL_4186539                                                                                                                                                                                                                              | Aegis Sciences Corporation                                                                          | Centers for Disease Control and Prevention Division of Viral Diseases, Pathogen Discovery                                         | Adrian Paskey; Alec Vest; Benjamin Rambo-Martin; Christopher Gulvick; Clinton Paden; Cyndi Clark; Dakota Howard; Darlene Wagner; Dhvani Batra; Dillon Nall; Duncan MacCannell; Erisa Sula; Ethan Sanders; Holly Houdeshell; Jason Caravas; Kara Moser; Kristine Lacek; Matthew Hardison; Matthew Schmerer; Ola Kvalvaag; Patrick Campbell; Peter Cook; Rob Case; Scott Sammons; Shatavia Morrison; Shaun Westlund; Tymecia Kendall; Victoria Caban Figueroa; Vikramsinha Ghorpade; Yvette Unoarumhi                                                                                                                                                                                                                                                                                                                                                                                                                                                                                                                                                                                                                                                                                                                                                                                                                                                                                                                                                                                                                                                                                                                                                                                           |
| EPI_ISL_1494722                                                                                                                                                                                                                                               | Area of Virology, Serology and Virology Division (SAVID), New South Wales Health Pathology Randwick | Virology Research Laboratory, Area of Virology, Serology and Virology Division (SAVID), New South Wales Health Pathology Randwick | Au, J.; Bull, R.; Deveson, I.; Foster, C.; Rawlinson, W.; Ruiz Silva, M.; Van Hal, S.                                                                                                                                                                                                                                                                                                                                                                                                                                                                                                                                                                                                                                                                                                                                                                                                                                                                                                                                                                                                                                                                                                                                                                                                                                                                                                                                                                                                                                                                                                                                                                                                         |
| EPI_ISL_4009030                                                                                                                                                                                                                                               | Arizona State Public Health Laboratory                                                              | Arizona State Public Health Laboratory                                                                                            | Jessica Escobar; Linda Getsinger; Matthew Contursi; Nobuko Fukushima; Stacy White; Trung Huynh; Victor Waddell                                                                                                                                                                                                                                                                                                                                                                                                                                                                                                                                                                                                                                                                                                                                                                                                                                                                                                                                                                                                                                                                                                                                                                                                                                                                                                                                                                                                                                                                                                                                                                                |
| EPI_ISL_1743605, EPI_ISL_1789685, EPI_ISL_1910812                                                                                                                                                                                                             | Arizona State University                                                                            | Arizona State University                                                                                                          | Efrem S. Lim; Joshua LaBaer; Joy M. Blain; LaRinda A. Holland; Matthew F. Smith; Nicholas J. Mellor; Peter T. Skidmore; Rabia Maqsood; Valerie Harris; Vel Murugan                                                                                                                                                                                                                                                                                                                                                                                                                                                                                                                                                                                                                                                                                                                                                                                                                                                                                                                                                                                                                                                                                                                                                                                                                                                                                                                                                                                                                                                                                                                            |
| EPI_ISL_4730653                                                                                                                                                                                                                                               | BIO-REFERENCE LABORATORIES                                                                          | Wadsworth Center, New York State Department of Health                                                                             | Alexis Russell; Catharine Prussing; Daryl M. Lamson; Erasmus Schneider; Erica Lasek-Nesselquist; John Kelly; Jonathan Pitnick; Kirsten St. George; Matthew Shudt; Melissa A Leisner; Navjot Singh                                                                                                                                                                                                                                                                                                                                                                                                                                                                                                                                                                                                                                                                                                                                                                                                                                                                                                                                                                                                                                                                                                                                                                                                                                                                                                                                                                                                                                                                                             |
| EPI_ISL_1740510                                                                                                                                                                                                                                               | BOSTON HEART DIAGNOSTICS CORP                                                                       | Wadsworth Center, New York State Department of Health                                                                             | Alexis Russell; Catharine Prussing; Daryl M. Lamson; Erasmus Schneider; Erica Lasek-Nesselquist; John Kelly; Jonathan Pitnick; Kirsten St. George; Matthew Shudt; Melissa A Leisner; Navjot Singh                                                                                                                                                                                                                                                                                                                                                                                                                                                                                                                                                                                                                                                                                                                                                                                                                                                                                                                                                                                                                                                                                                                                                                                                                                                                                                                                                                                                                                                                                             |
| EPI_ISL_2802859                                                                                                                                                                                                                                               | BioMoLab                                                                                            | Molecular Genetics Laboratory, Instituto de Investigaciones Químicas, Universidad Mayor de San Andrés                             | Aneth Vasquez Michel; Carmen Delgado Barrera; Oscar M. Rollano-Peñaloza; Sandra Miranda Sardon                                                                                                                                                                                                                                                                                                                                                                                                                                                                                                                                                                                                                                                                                                                                                                                                                                                                                                                                                                                                                                                                                                                                                                                                                                                                                                                                                                                                                                                                                                                                                                                                |
| EPI_ISL_2825823, EPI_ISL_2825959, EPI_ISL_2858496, EPI_ISL_2882440, EPI_ISL_2891522, EPI_ISL_2921738, EPI_ISL_4492341, EPI_ISL_4492403, EPI_ISL_4492455, EPI_ISL_4492459, EPI_ISL_4492542, EPI_ISL_4508728, EPI_ISL_4510342, EPI_ISL_4630962, EPI_ISL_4945961 | see above                                                                                           | CDPH VBL                                                                                                                          | CDPH-COVIDNet; Emily Smith on behalf of CDPH-COVIDNet; UCLA Technology Center for Genomics & Bioinformatics                                                                                                                                                                                                                                                                                                                                                                                                                                                                                                                                                                                                                                                                                                                                                                                                                                                                                                                                                                                                                                                                                                                                                                                                                                                                                                                                                                                                                                                                                                                                                                                   |
| EPI_ISL_3504753, EPI_ISL_3505400                                                                                                                                                                                                                              | CENTRO MEDICO NAVAL SEMAR LABORATORIO DE PATOLOGIA MOLECULAR                                        | CENTRO MEDICO NAVAL SEMAR LABORATORIO DE PATOLOGIA MOLECULAR                                                                      | MORALES RAMIREZ OMAR. MEIXUEIRO CALDERON CLAUDIA. ZUNO CORONADO TEUTLI. GARCIA ALEGRIA IRMA. ALVAREZ JIMENEZ VIOLETA DEJANIRA. LOPEZ BUSTOS ABRAHAM. CABRERA GONZALEZ MOISES. LIEVANO ESQUINCA JAZMIN. FIGUEROA ANTONIO VICTOR. ROMERO MORENO EDGAR ROMAN. CAZAREZ APATICA JAVIER. ROMERO ESPEJEL MARIA ELENEA. MORA HEREDIA JOSE EDUARDO. RUBIO ORTIZ MARGARITA. GALLARDO VERA FRANCISCO.; MORALES RAMIREZ OMAR. MEIXUEIRO CALDERON CLAUDIA. ZUNO CORONADO TEUTLI. GARCIA ALEGRIA IRMA. ALVAREZ JIMENEZ VIOLETA DEJANIRA. LOPEZ BUSTOS ABRAHAM. CABRERA GONZALEZ MOISES. LIEVANO ESQUINCA JAZMIN. FIGUEROA ANTONIO VICTOR. ROMERO MORENO EDGAR. CAZAREZ APATICA JAVIER. ROMERO ESPEJEL MARIA ELENEA. MORA HEREDIA JOSE EDUARDO. RUBIO ORTIZ MARGARITA. GALLARDO VERA FRANCISCO.                                                                                                                                                                                                                                                                                                                                                                                                                                                                                                                                                                                                                                                                                                                                                                                                                                                                                                              |
| EPI_ISL_1924630                                                                                                                                                                                                                                               | CHILDRENS HOSPITAL OF NORCAL                                                                        | Santa Clara County Public Health Laboratory                                                                                       | Santa Clara County Public Health Department                                                                                                                                                                                                                                                                                                                                                                                                                                                                                                                                                                                                                                                                                                                                                                                                                                                                                                                                                                                                                                                                                                                                                                                                                                                                                                                                                                                                                                                                                                                                                                                                                                                   |
| EPI_ISL_2778866, EPI_ISL_2837340, EPI_ISL_2837379, EPI_ISL_2837558, EPI_ISL_2837638, EPI_ISL_2837827, EPI_ISL_2837887                                                                                                                                         | see above                                                                                           | California Department of Public Health                                                                                            | CDPH-COVIDNet; UCLA Technology Center for Genomics & Bioinformatics                                                                                                                                                                                                                                                                                                                                                                                                                                                                                                                                                                                                                                                                                                                                                                                                                                                                                                                                                                                                                                                                                                                                                                                                                                                                                                                                                                                                                                                                                                                                                                                                                           |
| EPI_ISL_3505617, EPI_ISL_3505618, EPI_ISL_3505621                                                                                                                                                                                                             | Center for Research on Health in Latin America                                                      | Institute of Microbiology, Universidad San Francisco de Quito                                                                     | Belén Prado-Vivar; Bernardo Gutiérrez; Erika B. Muñoz; Erika Muñoz; Fernanda Zurita; Gabriel Trueba; Jaime Costales; Juan José Guadalupe; Michelle Grunauer; Monica Becerra-Wong; Patricio Rojas-Silva; Paúl Cárdenas; Sully Márquez; Verónica Barragán                                                                                                                                                                                                                                                                                                                                                                                                                                                                                                                                                                                                                                                                                                                                                                                                                                                                                                                                                                                                                                                                                                                                                                                                                                                                                                                                                                                                                                       |
| EPI_ISL_2426885                                                                                                                                                                                                                                               | Centers for Disease Control and Prevention, Dengue Branch                                           | Centers for Disease Control and Prevention, Dengue Branch                                                                         | Betzabel Flores; Gabriela Paz-Bailey; Gilberto A. Santiago; Glenda Gonzalez; Jorge L. Munoz-Jordan; Keyla Charriez                                                                                                                                                                                                                                                                                                                                                                                                                                                                                                                                                                                                                                                                                                                                                                                                                                                                                                                                                                                                                                                                                                                                                                                                                                                                                                                                                                                                                                                                                                                                                                            |
| EPI_ISL_2942421, EPI_ISL_2942735                                                                                                                                                                                                                              | Centro de Investigación Biomedica del Occidente (CIBO)                                              | Unidad de Genómica Avanzada                                                                                                       | ; Alejandra García-Gasca; Alejandra Hernandez-Teran; Alejandro Sanchez-Flores; Alfredo Herrera-Estrella; Alicia Ocaña-Mondragón; Andreu Comas-García; Angel Gustavo Salas-Lais; Antonio Loza Roman; Bernardo Martínez-Miguel; Blanca Taboada; Brenda Irasema Maldonado-Meza; Bruno Gomez-Gil; Carla Ivon Herrera-Najera; Carlos F. Arias; Celia Boukadida; Celida Duque Molina; Celida Martínez- Rodriguez; Clara Esperanza Santacruz-Tinoco; Concepcion Grajalles-Muñiz; Consorcio Mexicano de Vigilancia Genómica (CoVIGen-Mex). Authors (in alphabetical order): Julio Elias Alvarado-Yaah; Cristóbal Cháidez-Quiróz; Célida Dueque Molina; Célida Martínez- Rodríguez; Daniel Fregoso-Rueda; Daniel Lira Morales; Eduardo Becerril-Vargas; Fernando Fontove-Herrera; Fidencio Mejía-Nepomuceno; Francisco Pulido; Gloria Elena Espinosa-Ayala; Gloria María Molina-Salinas; Gloria Vazquez; Hector Esteban Paz-Juarez; Hector Montoya-Fuentes; Helen Haydee Fernanda Ramirez-Plascencia; Irvin Gonzalez-Lopez; Jean Pierre Gonzalez; Jesus Hernandez; Joel Armando Vazquez-Perez.; Jorge Salas-Hernandez; Jose Antonio Enciso-Moreno; Jose Arturo Martinez-Orozco; Jose Esteban Muñoz-Medina; Jose de Jesus Nuñez-Contreras; Juan Bautista Chale-Dzul; Julissa Enciso-Ibarra; Luis Alberto Ochoa-Carrera; Margarita Matias-Florentino; Maria Guadalupe Santiago-Mauricio; Maria Guadalupe de Jesus Mireles-Rivera; Mario Mujica-Sanchez; Marissa Perez-Garcia; Nelly Selem-Mojica; Pavel Isa; Ricardo Ciria Merce; Ricardo Grande; Rosa Maria Gutierrez Rios; Santiago avila-Rios; Selene Zarate; Susana Lopez; Veronica Mata-Haro; Victor Eduardo Garcia-Arias; Victor Hugo Borja-Aburto |
| EPI_ISL_2671629                                                                                                                                                                                                                                               | Centro de Investigación Biomedica del Noreste (CIBIN)                                               | Unidad de Genómica Avanzada                                                                                                       | ; Alejandra García-Gasca; Alejandra Hernandez-Teran; Alejandro Sanchez-Flores; Alfredo Herrera-Estrella; Alicia Ocaña-Mondragón; Andreu Comas-García; Angel Gustavo Salas-Lais; Antonio Loza Roman; Bernardo Martínez-Miguel; Blanca Taboada; Brenda Irasema Maldonado-Meza; Bruno Gomez-Gil; Carla Ivon Herrera-Najera; Carlos F. Arias; Celia Boukadida; Celida Duque Molina; Celida Martínez- Rodriguez; Clara Esperanza Santacruz-Tinoco; Concepcion Grajalles-Muñiz; Consorcio Mexicano de Vigilancia Genómica (CoVIGen-Mex). Authors (in alphabetical order): Julio Elias Alvarado-Yaah; Cristóbal Cháidez-Quiróz; Daniel Fregoso-Rueda; Daniel Lira Morales; Eduardo Becerril-Vargas; Fernando Fontove-Herrera; Fidencio Mejía-Nepomuceno; Francisco Pulido; Gloria Elena Espinosa-Ayala; Gloria María Molina-Salinas; Gloria Vazquez; Hector Esteban Paz-Juárez; Hector Montoya-Fuentes; Helen Haydee Fernanda Ramirez-Plascencia; Irvin Gonzalez-Lopez; Jean Pierre Gonzalez; Jesus Hernandez; Joel Armando Vazquez-Perez.; Jorge Salas-Hernandez; Jose Antonio Enciso-Moreno; Jose Arturo Martinez-Orozco; Jose Esteban Muñoz-Medina; Jose de Jesus Nuñez-Contreras; Juan Bautista Chale-Dzul; Julissa Enciso-Ibarra; Luis Alberto Ochoa-Carrera; Margarita Matias-Florentino; Maria Guadalupe Santiago-Mauricio; Maria Guadalupe de Jesus Mireles-Rivera; Mario Mujica-Sanchez; Marissa Perez-Garcia; Nelly Selem-Mojica; Pavel Isa; Ricardo Ciria Merce; Ricardo Grande; Rosa Maria Gutierrez Rios; Santiago avila-Rios; Selene Zarate; Susana Lopez; Veronica Mata-Haro; Victor Eduardo Garcia-Arias; Victor Hugo Borja-Aburto                                                   |
| EPI_ISL_2681201                                                                                                                                                                                                                                               | Centro de Investigación Biomedica del Noreste (CIBIN)                                               | Instituto de Biotecnología de la UNAM                                                                                             | ; Alejandra García-Gasca; Alejandra Hernández-Terán; Alejandro Sánchez-Flores; Alfredo Herrera-Estrella; Alicia Ocaña-Mondragón; Andreu Comas-García; Angel Gustavo Salas-Lais; Antonio Loza Román; Bernardo Martínez-Miguel; Blanca Taboada; Brenda Irasema Maldonado-Meza; Bruno Gómez-Gil; Carla Ivón Herrera-Najera; Carlos F. Arias; Celia Boukadida; Clara Esperanza Santacruz-Tinoco; Concepción Grajalles-Muñiz; Consorcio Mexicano de Vigilancia Genómica (CoVIGen-Mex). Authors (in alphabetical order): Julio Elias Alvarado-Yaah; Cristóbal Cháidez-Quiróz; Célida Dueque Molina; Célida Martínez- Rodríguez; Daniel Fregoso-Rueda; Daniel Lira Morales; Eduardo Becerril-Vargas; Fernando Fontove-Herrera; Fidencio Mejía-Nepomuceno; Francisco Pulido; Gloria Elena Espinosa-Ayala; Gloria María Molina-Salinas; Gloria Vazquez; Hector Esteban Paz-Juárez; Hector Montoya-Fuentes; Helen Haydee Fernanda Ramirez-Plascencia; Irvin González-López; Jean Pierre González; Jesús Hernández; José Antonio Enciso-Moreno; José Arturo Martínez-Orozco; José Esteban Muñoz-Medina; José de Jesús Nuñez-Contreras; Juan Bautista Chale-Dzul; Julissa Enciso-Ibarra; Luis Alberto Ochoa-Carrera; Margarita                                                                                                                                                                                                                                                                                                                                                                                                                                                                            |

|                                                                                                                                                                                                                                                                                                                                                                                                                                                                                                                                                                                                                                                                                                                                                                                                                                                                                                                                                                       |                                                                   |                                                                                                                                                                                                  |                                                                                                                                                                                                                                                                                                                                                                                                                                                                                                                                                                                                                                                                                                                        |  |
|-----------------------------------------------------------------------------------------------------------------------------------------------------------------------------------------------------------------------------------------------------------------------------------------------------------------------------------------------------------------------------------------------------------------------------------------------------------------------------------------------------------------------------------------------------------------------------------------------------------------------------------------------------------------------------------------------------------------------------------------------------------------------------------------------------------------------------------------------------------------------------------------------------------------------------------------------------------------------|-------------------------------------------------------------------|--------------------------------------------------------------------------------------------------------------------------------------------------------------------------------------------------|------------------------------------------------------------------------------------------------------------------------------------------------------------------------------------------------------------------------------------------------------------------------------------------------------------------------------------------------------------------------------------------------------------------------------------------------------------------------------------------------------------------------------------------------------------------------------------------------------------------------------------------------------------------------------------------------------------------------|--|
| EPI_ISL_2467085, EPI_ISL_2467167, EPI_ISL_2467197, EPI_ISL_2467224, EPI_ISL_2467225, EPI_ISL_2467355, EPI_ISL_2490299, EPI_ISL_2490302, EPI_ISL_3242733                                                                                                                                                                                                                                                                                                                                                                                                                                                                                                                                                                                                                                                                                                                                                                                                               |                                                                   |                                                                                                                                                                                                  |                                                                                                                                                                                                                                                                                                                                                                                                                                                                                                                                                                                                                                                                                                                        |  |
| see above                                                                                                                                                                                                                                                                                                                                                                                                                                                                                                                                                                                                                                                                                                                                                                                                                                                                                                                                                             | Clinica INDISA                                                    | "Facultad de Ciencias de la Vida, UNAB"                                                                                                                                                          | "Claudio Meneses; Ariel Orellana"; Claudio Olmos; Daniel Leon; Dayan Sanhueza; Eduardo Castro; Gonzalo Campaña; Macarena Bastias; Paola Pidal; Ricardo Yusta; Sebastian Wolter; Susana Saez; Víctor Monreal; Waldo Diaz                                                                                                                                                                                                                                                                                                                                                                                                                                                                                                |  |
| EPI_ISL_3404118, EPI_ISL_3583884, EPI_ISL_4301230                                                                                                                                                                                                                                                                                                                                                                                                                                                                                                                                                                                                                                                                                                                                                                                                                                                                                                                     | Colorado Department of Public Health and Environment              | Colorado Department of Public Health and Environment                                                                                                                                             | Alexandria Rossheim; Diana Ir; Emily A. Travanty; Laura Bankers; Mandy Waters; Michael Martin; Molly C. Hetherington-Rauth; Sarah Elizabeth Totten; Shannon R. Matzinger                                                                                                                                                                                                                                                                                                                                                                                                                                                                                                                                               |  |
| EPI_ISL_5017223, EPI_ISL_5017230, EPI_ISL_5017316                                                                                                                                                                                                                                                                                                                                                                                                                                                                                                                                                                                                                                                                                                                                                                                                                                                                                                                     | DeRisi Lab, University of California, San Francisco               | DeRisi Lab, University of California, San Francisco                                                                                                                                              | Amy Kistler; Anthea Mitchell; Carina Marquez; Diane Havlir; Diane Jones; Douglas Black; Eric Chow; Gabriel Chamie; Genay Pilarowski; Grace Wang; IDseq Team; Jackie Martinez; James Peng; Jamin Liu; John Schrom; Jon Jacobo; Lucy Li; Luis Rubio; Manu Vanaerschot; Matthew Laurie; Matthias Hapte-Selassie; Maya Petersen; Patrick Ayscue; Sabrina Mann; Sara Sunshine; Susana Rojas; Susy Rojas; Valerie Tulier-Laiwa; and Joseph DeRisi                                                                                                                                                                                                                                                                            |  |
| EPI_ISL_4405189                                                                                                                                                                                                                                                                                                                                                                                                                                                                                                                                                                                                                                                                                                                                                                                                                                                                                                                                                       | Departamento de Biología y genética molecular, IACA Laboratorios. | Área de Secuenciación del Laboratorio de Virología del Hospital de Niños Dr. Ricardo Gutierrez on behalf of "Proyecto Argentino Interinstitucional de genómica de SARS-CoV-2" (PAIS Consortium)  | ; A; Acuña; D; Goya; LE; Lusso; MI; MS; Masciovecchio MV; Nabaes Jodar; Natale; S; Streitenberger ER; Suárez; Valinotto; Viegas, M.                                                                                                                                                                                                                                                                                                                                                                                                                                                                                                                                                                                    |  |
| EPI_ISL_3050716                                                                                                                                                                                                                                                                                                                                                                                                                                                                                                                                                                                                                                                                                                                                                                                                                                                                                                                                                       | Dirección regional de salud del Callao (DIRESA-CALLAO)            | Centro de Investigaciones Tecnológicas, Biomédicas y Medioambientales (CITBM)                                                                                                                    | B; Huaman; J. Alarcon; M. Cuellar; M. Ramirez; M. Sovero                                                                                                                                                                                                                                                                                                                                                                                                                                                                                                                                                                                                                                                               |  |
| EPI_ISL_1962943, EPI_ISL_2476296, EPI_ISL_2862939, EPI_ISL_4075667, EPI_ISL_4543939                                                                                                                                                                                                                                                                                                                                                                                                                                                                                                                                                                                                                                                                                                                                                                                                                                                                                   | Dutch COVID-19 response team                                      | National Institute for Public Health and the Environment (RIVM)                                                                                                                                  | Adam Meijer; AnneMarie van den Brandt; Annelies Kroneman; Bas van der Veer; Chantal Reusken; Dennis Schmitz; Dirk Eggink; Eunice Then; Florian Zwagemaker; Harry Vennema; Ivo van Walle; James Groot; Jeroen Cremer; Karim Hajji; Kim Frenkens; Linda van de Nes; Lisa Wijsman; Lynn Aarts; Melissa van Tuil; Ryanne Jaarsma; Sanne Bos; Sharon van den Brink; Sjoerd Kulling; Stijn van Rossum; on behalf of the national COVID-19 response team                                                                                                                                                                                                                                                                      |  |
| EPI_ISL_3475844                                                                                                                                                                                                                                                                                                                                                                                                                                                                                                                                                                                                                                                                                                                                                                                                                                                                                                                                                       | EXCITE Lab                                                        | Andersen lab at Scripps Research                                                                                                                                                                 | Abigail Schnapper; Araz Majnoonian; Ashkan Hassani; Fitri Carrisa Wijaya; Greg Humphrey; Helena Tubb; Laura Kohn; Marlene Flores; Megan Nguyen; Patricia Gonzalez-Zuniga; Rebecca Fielding-Miller; Rodolfo Salido; Sawyer Farmer; Smruthi Karthikeyan; Tommy Valles + SEARCH; Victor Cantu; Vinton Omaleki                                                                                                                                                                                                                                                                                                                                                                                                             |  |
| EPI_ISL_1531049, EPI_ISL_2836476, EPI_ISL_2860404, EPI_ISL_5322136, EPI_ISL_5925059, EPI_ISL_5925203                                                                                                                                                                                                                                                                                                                                                                                                                                                                                                                                                                                                                                                                                                                                                                                                                                                                  | Florida Bureau of Public Health Laboratories                      | Florida Bureau of Public Health Laboratories                                                                                                                                                     | Jason Blanton; Namratha Tarigopula; Sarah Schmedes; Tiffany Splatt                                                                                                                                                                                                                                                                                                                                                                                                                                                                                                                                                                                                                                                     |  |
| EPI_ISL_4368640, EPI_ISL_4368794, EPI_ISL_4369817, EPI_ISL_5217159                                                                                                                                                                                                                                                                                                                                                                                                                                                                                                                                                                                                                                                                                                                                                                                                                                                                                                    | Fulgent Genetics                                                  | Centers for Disease Control and Prevention Division of Viral Diseases, Pathogen Discovery                                                                                                        | Becky Tsai; Benafsh Sapra; Benjamin Rambo-Martin; Christopher Gulvick; Clinton Paden; Dakota Howard; Dhvani Batra; Doreen Ng; Duncan MacCannell; Erisa Sula; Harry Gao; James Xie; Jason Caravas; John Gao; Joseph Ferro; Kristine Lacey; Matthew Schmerer; Mickey Li; Peter Cook; Scott Sammons; Shatavia Morrison; Tymeckia Kendall; Victoria Caban Figueroa; Yan Meng; Yvette Unoarumhi                                                                                                                                                                                                                                                                                                                             |  |
| EPI_ISL_4566172                                                                                                                                                                                                                                                                                                                                                                                                                                                                                                                                                                                                                                                                                                                                                                                                                                                                                                                                                       | Gencore - Universidad de los Andes                                | Gencore - Universidad de los Andes                                                                                                                                                               | Cristian Barrera; David González; Gabriela Ariza; Luisa Sacristan; Marcela Guevara; Marcela Mercado; Silvia Restrepo                                                                                                                                                                                                                                                                                                                                                                                                                                                                                                                                                                                                   |  |
| EPI_ISL_1633370, EPI_ISL_1633419, EPI_ISL_1633507, EPI_ISL_1633511, EPI_ISL_2391023, EPI_ISL_2391031, EPI_ISL_2391034, EPI_ISL_2391035, EPI_ISL_2391043, EPI_ISL_2391048, EPI_ISL_2391050, EPI_ISL_2391058, EPI_ISL_2391070, EPI_ISL_2391370, EPI_ISL_2391373, EPI_ISL_2508552, EPI_ISL_2508560, EPI_ISL_2508582, EPI_ISL_2508585, EPI_ISL_2557281, EPI_ISL_2756225, EPI_ISL_2756227, EPI_ISL_2756259, EPI_ISL_3185488, EPI_ISL_3185590, EPI_ISL_3220035, EPI_ISL_3358556, EPI_ISL_3537150, EPI_ISL_3987631, EPI_ISL_3987634, EPI_ISL_3988213, EPI_ISL_4005059, EPI_ISL_4005060, EPI_ISL_4005061, EPI_ISL_4005128, EPI_ISL_4005129, EPI_ISL_4005130, EPI_ISL_4005131, EPI_ISL_4005132, EPI_ISL_4005189, EPI_ISL_4005195, EPI_ISL_4005196, EPI_ISL_4005197, EPI_ISL_4005198, EPI_ISL_4005199, EPI_ISL_4005200, EPI_ISL_4005201, EPI_ISL_4005202, EPI_ISL_4005203, EPI_ISL_4632306, EPI_ISL_4632771, EPI_ISL_4632813, EPI_ISL_4655535, EPI_ISL_5431389, EPI_ISL_5694321 |                                                                   | Andres Castillo; Barbara Parra; Constanza Campano; Gisselle Barra; Jaime Lagos; Javier Tognarelli; Jorge Fernandez; Karen Orostica; Loredana Arata; Patricia Bustos; Rodrigo Fasce; Soledad Ulla |                                                                                                                                                                                                                                                                                                                                                                                                                                                                                                                                                                                                                                                                                                                        |  |
| see above                                                                                                                                                                                                                                                                                                                                                                                                                                                                                                                                                                                                                                                                                                                                                                                                                                                                                                                                                             | Genética Molecular and Subdepartamento de Virología ISP Chile     | Instituto de Salud Publica de Chile                                                                                                                                                              |                                                                                                                                                                                                                                                                                                                                                                                                                                                                                                                                                                                                                                                                                                                        |  |
| EPI_ISL_5196216, EPI_ISL_5196217, EPI_ISL_5196309                                                                                                                                                                                                                                                                                                                                                                                                                                                                                                                                                                                                                                                                                                                                                                                                                                                                                                                     | Gorgas Memorial Institute of Health Studies                       | Gorgas Memorial Institute of Health Studies                                                                                                                                                      | Castillo Jorge; Chen Maria; Franco Danilo; Gonzalez Claudia; Jessica Gondola; Leyda Abrego; Lopez-Verges Sandra; Marlene Castillo; Martinez Alexander; Menacho Abdiel; Moreno Ambar; Moreno Brechla; Oris Chavarria; Ortiz Alma; Salazar Jacqueline                                                                                                                                                                                                                                                                                                                                                                                                                                                                    |  |
| EPI_ISL_4744468, EPI_ISL_4744604                                                                                                                                                                                                                                                                                                                                                                                                                                                                                                                                                                                                                                                                                                                                                                                                                                                                                                                                      | Gorgas Memorial Laboratory of Health Studies                      | Gorgas Memorial Laboratory of Health Studies                                                                                                                                                     | Castillo Jorge; Chen Maria; Franco Danilo; Gonzalez Claudia; Jessica Gondola; Leyda Abrego; Lopez-Verges Sandra; Marlene Castillo; Martinez Alexander; Menacho Abdiel; Moreno Ambar; Moreno Brechla; Oris Chavarria; Ortiz Alma; Salazar Jacqueline                                                                                                                                                                                                                                                                                                                                                                                                                                                                    |  |
| EPI_ISL_3298307                                                                                                                                                                                                                                                                                                                                                                                                                                                                                                                                                                                                                                                                                                                                                                                                                                                                                                                                                       | HOSPITAL CIUDAD NEILY                                             | Incienza, Instituto Costarricense de Investigación y Enseñanza en Nutrición y Salud                                                                                                              | Adriana Godínez; Claudio Soto-Garita; Estela Cordero; Francisco Duarte; Hebleen Porras; Joselyn Prado & Nelly Castro; José Luis Vargas; Mariela Gutiérrez; Melany Calderón                                                                                                                                                                                                                                                                                                                                                                                                                                                                                                                                             |  |
| EPI_ISL_4414811, EPI_ISL_4425165                                                                                                                                                                                                                                                                                                                                                                                                                                                                                                                                                                                                                                                                                                                                                                                                                                                                                                                                      | HOSPITAL COMARCAL DE MELILLA                                      | Instituto de Salud Carlos III                                                                                                                                                                    | A. Monzón; F. Casas; I. Jiménez; I. ROMAN SOTO; I.ROMAN SOTO; Iglesias-Caballero; M. Camarero; M. Sandonis; P. Zaballos; S. Camarero; S. Cuesta; S. Iglesias-Caballero; S. Pozo; S. Varona; SERGIO; Sandonis; V. Vázquez-Morón                                                                                                                                                                                                                                                                                                                                                                                                                                                                                         |  |
| EPI_ISL_3502724                                                                                                                                                                                                                                                                                                                                                                                                                                                                                                                                                                                                                                                                                                                                                                                                                                                                                                                                                       | HOSPITAL DE FUENLABRADA                                           | HOSPITAL UNIVERSITARIO 12 DE OCTUBRE                                                                                                                                                             | Carmen Martín-Higuera; Esther Viedma; Irene Muñoz-Gallego; M.ª Dolores Folgúeira; Mar Aguilera; Noelia Moral; Rafael Delgado; Sagrario Zurita                                                                                                                                                                                                                                                                                                                                                                                                                                                                                                                                                                          |  |
| EPI_ISL_4601233                                                                                                                                                                                                                                                                                                                                                                                                                                                                                                                                                                                                                                                                                                                                                                                                                                                                                                                                                       | HOSPITAL DR. RAFAEL A. CALDERON GUARDIA                           | Incienza, Instituto Costarricense de Investigación y Enseñanza en Nutrición y Salud                                                                                                              | Adriana Godínez; Claudio Soto-Garita; Estela Cordero; Francisco Duarte; Hebleen Porras; Joselyn Prado & Fabián Salas Flores; José Luis Vargas; Mariela Gutiérrez; Melany Calderón                                                                                                                                                                                                                                                                                                                                                                                                                                                                                                                                      |  |
| EPI_ISL_4258671                                                                                                                                                                                                                                                                                                                                                                                                                                                                                                                                                                                                                                                                                                                                                                                                                                                                                                                                                       | HOSPITAL DR. WILLIAM ALLEN                                        | Incienza, Instituto Costarricense de Investigación y Enseñanza en Nutrición y Salud                                                                                                              | Adriana Godínez; Claudio Soto-Garita; Estela Cordero; Francisco Duarte; Hebleen Porras; Joselyn Prado & Mónica Chapentier Artavia; José Luis Vargas; Mariela Gutiérrez; Melany Calderón                                                                                                                                                                                                                                                                                                                                                                                                                                                                                                                                |  |
| EPI_ISL_3260878, EPI_ISL_4919263                                                                                                                                                                                                                                                                                                                                                                                                                                                                                                                                                                                                                                                                                                                                                                                                                                                                                                                                      | HOSPITAL GENERAL UNIVERSITARIO DE GUADALAJARA                     | Instituto de Salud Carlos III                                                                                                                                                                    | A. Monzón; ALEJANDRO; F. Casas; I. GONZALEZ PRAETORIUS; I. Jiménez; I.GONZALEZ PRAETORIUS; Iglesias-Caballero; M. Camarero; M. Sandonis; P. Zaballos; S. Camarero; S. Cuesta; S. Iglesias-Caballero; S. Pozo; S. Varona; Sandonis; V. Vázquez-Morón                                                                                                                                                                                                                                                                                                                                                                                                                                                                    |  |
| EPI_ISL_3260828                                                                                                                                                                                                                                                                                                                                                                                                                                                                                                                                                                                                                                                                                                                                                                                                                                                                                                                                                       | HOSPITAL GENERAL VIRGEN DE LA LUZ                                 | Instituto de Salud Carlos III                                                                                                                                                                    | A. Monzón; F. Casas; I. Jiménez; I.RODRIGUEZ ESCUDERO; M. Sandonis; MARIA JOSE; P. Zaballos; S. Cuesta; S. Iglesias-Caballero; S. Pozo; S. Varona; V. Camarero; Vázquez-Morón                                                                                                                                                                                                                                                                                                                                                                                                                                                                                                                                          |  |
| EPI_ISL_5650499                                                                                                                                                                                                                                                                                                                                                                                                                                                                                                                                                                                                                                                                                                                                                                                                                                                                                                                                                       | HOSPITAL MUNICIPAL DR MARIO GATTI CAMPINAS                        | Instituto Butantan                                                                                                                                                                               | Antonio Jorge Martins; Claudia Renata dos Santos Barros; David Schlesinger; Debora Botequiu Moretti; Dimas Tadeu Covas; Elaine Cristina Marquize; Elaine Vieira Santos; Evandra Strazza Rodrigues; Heidge Fukumasu; Jayme Augusto de Souza-Neto; José Salvatore Leister Patané; Luiz Alcantara; Luiz Lehmann Coutinho; Maria Carolina Elias; Maurício Lacerda Nogueira; Rafael dos Santos Bezerra; Raul Machado Neto; Rejane Maria Tommasini Grotto; Ricardo Haddad; Sandra Coccuzzo Sampaio Vessoni; Simone Kashima; Svetoslav Nanev Slavov; Vincent Louis Viala                                                                                                                                                      |  |
| EPI_ISL_3761785, EPI_ISL_3761805                                                                                                                                                                                                                                                                                                                                                                                                                                                                                                                                                                                                                                                                                                                                                                                                                                                                                                                                      | HOSPITAL NACIONAL DE NIÑOS                                        | Incienza, Instituto Costarricense de Investigación y Enseñanza en Nutrición y Salud                                                                                                              | Cristian Pérez-Corrales & Valeria Peralta-Barquero                                                                                                                                                                                                                                                                                                                                                                                                                                                                                                                                                                                                                                                                     |  |
| EPI_ISL_3502766, EPI_ISL_3532486                                                                                                                                                                                                                                                                                                                                                                                                                                                                                                                                                                                                                                                                                                                                                                                                                                                                                                                                      | HOSPITAL UNIVERSITARIO 12 DE OCTUBRE                              | HOSPITAL UNIVERSITARIO 12 DE OCTUBRE                                                                                                                                                             | Carmen Martín-Higuera; Esther Viedma; Irene Muñoz-Gallego; M.ª Dolores Folgúeira; Mar Aguilera; Noelia Moral; Rafael Delgado; Sagrario Zurita                                                                                                                                                                                                                                                                                                                                                                                                                                                                                                                                                                          |  |
| EPI_ISL_5145554                                                                                                                                                                                                                                                                                                                                                                                                                                                                                                                                                                                                                                                                                                                                                                                                                                                                                                                                                       |                                                                   | Centers for Disease Control and Prevention Division of Viral Diseases, Pathogen Discovery                                                                                                        | Benjamin Rambo-Martin; Christopher Gulvick; Clinton Paden; Dakota Howard; Dhvani Batra; Duncan MacCannell; Erisa Sula; Helix CA; Jason Caravas; Kristine Lacey; Matthew Schmerer; Peter Cook; Scott Sammons; Shatavia Morrison; Tymeckia Kendall; Victoria Caban Figueroa; Yvette Unoarumhi                                                                                                                                                                                                                                                                                                                                                                                                                            |  |
| EPI_ISL_2097767                                                                                                                                                                                                                                                                                                                                                                                                                                                                                                                                                                                                                                                                                                                                                                                                                                                                                                                                                       | Helix/Illumina                                                    | Centers for Disease Control and Prevention Division of Viral Diseases, Pathogen Discovery                                                                                                        | Adrian Paskey; Alexandre Bolze; Ary Ascencio; Benjamin Rambo-Martin; Brad Sickler; Charlotte Rivera-Garcia; Christine Tran; Christopher Gulvick; Clinton R. Paden; Dakota Howard; Darlene Wagner; David Becker; Dhvani Batra; Duncan MacCannell; Efen Sandoval; Eileen de Feo; Elizabeth Cirulli; Eric Allen; Geraint Levay; James Lu; Jan Antico; Jason Caravas; Jason Nguyen; Jimmy Ramirez; Jingtao Liu; Kara Moser; Kelly Schiabor Barrett; Kim Gietzen; Magnus Isaksson; Marc Laurent; Matthew Schmerer; Matthew Tolentino; Nicole L. Washington; Peter W. Cook; Phil Febbo; Ryan Cho; Scott Sammons; Shannon Wickline; Shatavia Morrison; Sherry Wang; Simon White; Tyler Cassens; William Lee; Yvette Unoarumhi |  |
| EPI_ISL_3149729                                                                                                                                                                                                                                                                                                                                                                                                                                                                                                                                                                                                                                                                                                                                                                                                                                                                                                                                                       | Hosp. 4 de Junio Dr. Ramón Carrillo                               | Laboratorio de Biología Molecular, Instituto de Medicina Regional on behalf of "Proyecto Argentino Interinstitucional de genómica de SARS-CoV-2" (PAIS Consortium)                               | Andrea Carolina Piedrabuena; Bettina Brusés; Diana Pérez Quintana; Gabriela Jurasek; Griselda Oria; Horacio Lucero.; Javier Mussin; Laura Formichelli; Mayra Mendoza; Melina Lorenzini Campos; Raúl Maximiliano Acevedo                                                                                                                                                                                                                                                                                                                                                                                                                                                                                                |  |
| EPI_ISL_3149737, EPI_ISL_3388831                                                                                                                                                                                                                                                                                                                                                                                                                                                                                                                                                                                                                                                                                                                                                                                                                                                                                                                                      | Hosp. Pediátrico Dr. Avelino Castelañ                             | Laboratorio de Biología Molecular, Instituto de Medicina Regional on behalf of "Proyecto Argentino Interinstitucional de genómica de SARS-CoV-2" (PAIS Consortium)                               | Bettina Brusés; Gioia Lucia Marino; Griselda Oria; Horacio Lucero.; Javier Mussin; Julieta Ronchi; Laura Formichelli; María Andrea Gili; María Cecilia López; Melina Lorenzini Campos; Raúl Maximiliano Acevedo                                                                                                                                                                                                                                                                                                                                                                                                                                                                                                        |  |
| EPI_ISL_1476984, EPI_ISL_1477056, EPI_ISL_1647954, EPI_ISL_2080925, EPI_ISL_2178831, EPI_ISL_2402462, EPI_ISL_2402482, EPI_ISL_2402495, EPI_ISL_2402498, EPI_ISL_2483984, EPI_ISL_2601722                                                                                                                                                                                                                                                                                                                                                                                                                                                                                                                                                                                                                                                                                                                                                                             |                                                                   |                                                                                                                                                                                                  | Cristina Rodriguez-Grande; Darío García de Viedma; Julia Suárez; Laura Pérez-Lago; Marta Herranz Martin; Patricia Muñoz; Pedro Sola Campoy; Pilar Catalán; Sergio Buenestado Serrano; Victor Manuel de la Cueva; Victor de la Cueva                                                                                                                                                                                                                                                                                                                                                                                                                                                                                    |  |
| see above                                                                                                                                                                                                                                                                                                                                                                                                                                                                                                                                                                                                                                                                                                                                                                                                                                                                                                                                                             | Hospital General Universitario Gregorio Marañón                   | Hospital General Universitario Gregorio Marañón                                                                                                                                                  |                                                                                                                                                                                                                                                                                                                                                                                                                                                                                                                                                                                                                                                                                                                        |  |
| EPI_ISL_3216213,                                                                                                                                                                                                                                                                                                                                                                                                                                                                                                                                                                                                                                                                                                                                                                                                                                                                                                                                                      | Hospital General                                                  | SeqCOVID-SPAIN                                                                                                                                                                                   | Carmen Molina Pardines and SeqCOVID-SPAIN consortium; Maripaz Ventero Martín                                                                                                                                                                                                                                                                                                                                                                                                                                                                                                                                                                                                                                           |  |

|                                                                                                                                                                                                                                                                                                                                                                                                                                         |                                                                                                                |                                                                                                                                                                                                 |                                                                                                                                                                                                                                                                                                                                                                                                                                                                                                                                                                                                                                                                                                                                                                                                                                                                                                                                                                                                                                                                                                                                                                                                                                                                                                                                                                                                                                                                                                                                                                                                                                                                                                                                                                                                                                                                                                                                                                                                                                          |
|-----------------------------------------------------------------------------------------------------------------------------------------------------------------------------------------------------------------------------------------------------------------------------------------------------------------------------------------------------------------------------------------------------------------------------------------|----------------------------------------------------------------------------------------------------------------|-------------------------------------------------------------------------------------------------------------------------------------------------------------------------------------------------|------------------------------------------------------------------------------------------------------------------------------------------------------------------------------------------------------------------------------------------------------------------------------------------------------------------------------------------------------------------------------------------------------------------------------------------------------------------------------------------------------------------------------------------------------------------------------------------------------------------------------------------------------------------------------------------------------------------------------------------------------------------------------------------------------------------------------------------------------------------------------------------------------------------------------------------------------------------------------------------------------------------------------------------------------------------------------------------------------------------------------------------------------------------------------------------------------------------------------------------------------------------------------------------------------------------------------------------------------------------------------------------------------------------------------------------------------------------------------------------------------------------------------------------------------------------------------------------------------------------------------------------------------------------------------------------------------------------------------------------------------------------------------------------------------------------------------------------------------------------------------------------------------------------------------------------------------------------------------------------------------------------------------------------|
| EPI_ISL_3216411                                                                                                                                                                                                                                                                                                                                                                                                                         | Universitario de Alicante - Instituto de Investigación Sanitaria y Biomédica de Alicante                       | consortium/BV(CSIC)                                                                                                                                                                             |                                                                                                                                                                                                                                                                                                                                                                                                                                                                                                                                                                                                                                                                                                                                                                                                                                                                                                                                                                                                                                                                                                                                                                                                                                                                                                                                                                                                                                                                                                                                                                                                                                                                                                                                                                                                                                                                                                                                                                                                                                          |
| EPI_ISL_4405091                                                                                                                                                                                                                                                                                                                                                                                                                         | Hospital General de Agudos Dr. Cosme Argerich                                                                  | Área de Secuenciación del Laboratorio de Virología del Hospital de Niños Dr. Ricardo Gutiérrez on behalf of 'Proyecto Argentino Interinstitucional de genómica de SARS-CoV-2' (PAIS Consortium) | Acuña; Andrea Fernández; D; Florencia Funez; Florencia Rodríguez; Goya; Jéscica Galeano; Karina Polanski; LE; Lusso; MI; MS; Marcia Pozzati; Nabaes Jodar; Natale; S; Valinotto; Viegas, M.                                                                                                                                                                                                                                                                                                                                                                                                                                                                                                                                                                                                                                                                                                                                                                                                                                                                                                                                                                                                                                                                                                                                                                                                                                                                                                                                                                                                                                                                                                                                                                                                                                                                                                                                                                                                                                              |
| EPI_ISL_2026434                                                                                                                                                                                                                                                                                                                                                                                                                         | Hospital Sharp                                                                                                 | Microbial Genomics Laboratory                                                                                                                                                                   | Alejandra García-Gasca; Bruno Gomez-Gil; Daniel Fregoso-Rueda; Julissa Enciso-Ibarra                                                                                                                                                                                                                                                                                                                                                                                                                                                                                                                                                                                                                                                                                                                                                                                                                                                                                                                                                                                                                                                                                                                                                                                                                                                                                                                                                                                                                                                                                                                                                                                                                                                                                                                                                                                                                                                                                                                                                     |
| EPI_ISL_3022934                                                                                                                                                                                                                                                                                                                                                                                                                         | Hospital of the University of Pennsylvania Molecular Pathology Lab                                             | Bushman Lab - University of Pennsylvania                                                                                                                                                        | Aoife M. Roche; Arupa Ganguly; Ayannah S. Fitzgerald; Brendan Kelly; Jevon Graham-Wooten; John K. Everett; Kyle Rodino; Layla A. Khatib; Mike Feldman; Ronald G. Collman and Frederic Bushan; Samantha A. Whiteside; Scott Sherrill-Mix; Shantan Reddy; Young Hwang                                                                                                                                                                                                                                                                                                                                                                                                                                                                                                                                                                                                                                                                                                                                                                                                                                                                                                                                                                                                                                                                                                                                                                                                                                                                                                                                                                                                                                                                                                                                                                                                                                                                                                                                                                      |
| EPI_ISL_3459416, EPI_ISL_3459417                                                                                                                                                                                                                                                                                                                                                                                                        | IDIME-CLINICA NUEVA DE CALI                                                                                    | Instituto Nacional de Salud                                                                                                                                                                     | Carlos Franco-Muñoz; Carmen Osorio; Diana Malo; Diego A. Álvarez-Díaz; Diego Andrés Prada; Gerardo Santamaría; Hector Alejandro Ruiz-Moreno; Jhonnatan Reales-González; Jorge Rivera; Juan Camilo Martínez; Julian Naizaque; Katherine Laiton-Donato; Lisseth Pardo; Magdalena Wiesner; Marcela Mercado-Reyes; María T. Herrera-Sepúlveda; Marta Lopez Blanco; Martha Lucia Ospina Martínez; Paola Rojas; Sergio Gomez; Sheryll Corchuelo; Angela Alarcon Cruz                                                                                                                                                                                                                                                                                                                                                                                                                                                                                                                                                                                                                                                                                                                                                                                                                                                                                                                                                                                                                                                                                                                                                                                                                                                                                                                                                                                                                                                                                                                                                                           |
| EPI_ISL_5645590                                                                                                                                                                                                                                                                                                                                                                                                                         | INSIDE DIAGNOSTICOS                                                                                            | Instituto Butantan                                                                                                                                                                              | Antonio Jorge Martins; Claudia Renata dos Santos Barros; David Schlesinger; Debora Botequiu Moretti; Dimas Tadeu Covas; Elaine Cristina Marqueze; Elaine Vieira Santos; Evandra Strazza Rodrigues; Heidge Fukumasu; Jayme Augusto de Souza-Neto; José Salvatore Leister Patané; Luiz Alcantara; Luiz Lehmann Coutinho; Maria Carolina Elias; Maurício Lacerda Nogueira; Rafael dos Santos Bezerra; Raul Machado Neto; Rejane Maria Tommasini Grotto; Ricardo Haddad; Sandra Coccuzzo Sampaio Vessonni; Simone Kashima; Svetoslav Nanev Slavov; Vincent Louis Viala                                                                                                                                                                                                                                                                                                                                                                                                                                                                                                                                                                                                                                                                                                                                                                                                                                                                                                                                                                                                                                                                                                                                                                                                                                                                                                                                                                                                                                                                       |
| EPI_ISL_2897556, EPI_ISL_3274403, EPI_ISL_3274435, EPI_ISL_4467161, EPI_ISL_4496961, EPI_ISL_4497139, EPI_ISL_4497162                                                                                                                                                                                                                                                                                                                   | see above                                                                                                      | INSPI-CRN DE INFLUENZA Y OTROS VIRUS RESPIRATORIOS                                                                                                                                              | NIC-INSPI<br>Alfredo Bruno; Carlos Chiluisa; Daniel Ramos; Domenica de Mora.; Jimmy Garcés; Johanna Laines; Lizbeth Patiño; Manuel Gonzalez; Maria Angelica Becerra; Maritza Olmedo; Mayra Wilca; Michelle Páez                                                                                                                                                                                                                                                                                                                                                                                                                                                                                                                                                                                                                                                                                                                                                                                                                                                                                                                                                                                                                                                                                                                                                                                                                                                                                                                                                                                                                                                                                                                                                                                                                                                                                                                                                                                                                          |
| EPI_ISL_2598289                                                                                                                                                                                                                                                                                                                                                                                                                         | IVY3 Central Lab, Vanderbilt University Medical Center                                                         | Lauring Lab, University of Michigan, Department of Microbiology and Immunology                                                                                                                  | Valesano                                                                                                                                                                                                                                                                                                                                                                                                                                                                                                                                                                                                                                                                                                                                                                                                                                                                                                                                                                                                                                                                                                                                                                                                                                                                                                                                                                                                                                                                                                                                                                                                                                                                                                                                                                                                                                                                                                                                                                                                                                 |
| EPI_ISL_2492352, EPI_ISL_3505614, EPI_ISL_5330392                                                                                                                                                                                                                                                                                                                                                                                       | Institute of Microbiology, Universidad San Francisco de Quito                                                  | Institute of Microbiology, Universidad San Francisco de Quito                                                                                                                                   | Alexandra Gonzalez; Belén Prado-Vivar; Bernardo Gutiérrez; Betty Angulo; Christian Zambrano; Erika B. Muñoz; Fernanda Zurita; Francisco Guerra; Gabriel Trueba; Hugo Vergara; Jeaninna Peña; Juan Carlos Zuñiga; Juan José Guadalupe; Liu Yuqian; Lofrein Vera; Luis Fuenmayor; Luz-Angelica Castillo; Marco Viteri Yanez; Mateo Carvajal; Michelle Grunauer; Michelle Jacome; Monica Becerra-Wong; Nancy Flores Lastra; Natalia Parra; Patricio Rojas-Silva; Paul Cárdenas; Stephanie Espin-Arroba; Sully Márquez; Valeria Armijos; Verónica Barraquán                                                                                                                                                                                                                                                                                                                                                                                                                                                                                                                                                                                                                                                                                                                                                                                                                                                                                                                                                                                                                                                                                                                                                                                                                                                                                                                                                                                                                                                                                  |
| EPI_ISL_1629764                                                                                                                                                                                                                                                                                                                                                                                                                         | Instituto de Medicina Tropical Alexander Von Humboldt, Universidad Peruana Cayetano Heredia                    | Laboratorio de Genómica Microbiana, Universidad Peruana Cayetano Heredia                                                                                                                        | Alejandra Dávila-Barclay; Diego Cuicapuzá; Guillermo Salvatierra; Janet Huancachoque; Lenin Maturrano; Luis González; Pablo Tsukayama; Pedro E. Romero; Pool Marcos                                                                                                                                                                                                                                                                                                                                                                                                                                                                                                                                                                                                                                                                                                                                                                                                                                                                                                                                                                                                                                                                                                                                                                                                                                                                                                                                                                                                                                                                                                                                                                                                                                                                                                                                                                                                                                                                      |
| EPI_ISL_1663002                                                                                                                                                                                                                                                                                                                                                                                                                         | Johns Hopkins Hospital Department of Pathology                                                                 | Johns Hopkins Hospital Department of Pathology                                                                                                                                                  | Adannaya Amadi; C. Paul Morris; Chun Hual Luo; Heba H. Mostafa; Matthew Schwartz                                                                                                                                                                                                                                                                                                                                                                                                                                                                                                                                                                                                                                                                                                                                                                                                                                                                                                                                                                                                                                                                                                                                                                                                                                                                                                                                                                                                                                                                                                                                                                                                                                                                                                                                                                                                                                                                                                                                                         |
| EPI_ISL_1380618                                                                                                                                                                                                                                                                                                                                                                                                                         | KU Leuven, Rega Institute, Clinical and Epidemiological Virology                                               | KU Leuven, Rega Institute, Clinical and Epidemiological Virology                                                                                                                                | Bert Vanmechelen; Joan Marti-Carerras; Piet Maes; Tony Wawina-Bokalanga                                                                                                                                                                                                                                                                                                                                                                                                                                                                                                                                                                                                                                                                                                                                                                                                                                                                                                                                                                                                                                                                                                                                                                                                                                                                                                                                                                                                                                                                                                                                                                                                                                                                                                                                                                                                                                                                                                                                                                  |
| EPI_ISL_2020336, EPI_ISL_3507712, EPI_ISL_3824488                                                                                                                                                                                                                                                                                                                                                                                       | Kantonsspital Winterthur                                                                                       | Institute of Medical Virology                                                                                                                                                                   | Alexandra Trkoca; Annette Audigé; Annette Audigž; Catharine Aquino; Cyril Shah; Daniel Ehrsam; Gabriela Ziltener; Guido Bloemberg; Hubert Rehrauer; Isabel Stürmer; Joel Wirz; Jon Huder; Jürg Böni; Jýrg Bñni; Kevin Steiner; Maria Grünberg; Maria Grýnberg; Maryam Zaheri; Michael Huber; Riccarda Capaul; Stefan Schmutz; Verena Kufner; Weihong Qi                                                                                                                                                                                                                                                                                                                                                                                                                                                                                                                                                                                                                                                                                                                                                                                                                                                                                                                                                                                                                                                                                                                                                                                                                                                                                                                                                                                                                                                                                                                                                                                                                                                                                  |
| EPI_ISL_3460005                                                                                                                                                                                                                                                                                                                                                                                                                         | LESP Campeche                                                                                                  | Instituto de Diagnostico y Referencia Epidemiologicos (INDRE)                                                                                                                                   | Abril Rodriguez-Maldonado; Ariadna Medina-Benitez; Claudia Wong-Arambula; Ernesto Ramirez-Gonzalez.; Gisela Barrera-Badillo; Irma Lopez-Martinez; Joaquin Quiroz-Mercado; Lucia Hernandez-Rivas; Maribel Gonzalez-Villa; Natividad Cruz-Ortiz; Sergio Rangel-Guerrero; Tatiana Nunez-Garcia; Vanessa Rivero-Arredondo                                                                                                                                                                                                                                                                                                                                                                                                                                                                                                                                                                                                                                                                                                                                                                                                                                                                                                                                                                                                                                                                                                                                                                                                                                                                                                                                                                                                                                                                                                                                                                                                                                                                                                                    |
| EPI_ISL_2157333, EPI_ISL_2342996, EPI_ISL_2492466, EPI_ISL_2492484, EPI_ISL_2492490, EPI_ISL_2545818                                                                                                                                                                                                                                                                                                                                    | LESP Ciudad de Mexico                                                                                          | Instituto de Diagnostico y Referencia Epidemiologicos (INDRE)                                                                                                                                   | Abril Rodriguez-Maldonado; Ariadna Medina-Benitez; Claudia Wong-Arambula; Ernesto Ramirez-Gonzalez.; Gisela Barrera-Badillo; Irma Lopez-Martinez; Joaquin Quiroz-Mercado; Lucia Hernandez-Rivas; Natividad Cruz-Ortiz; Sergio Rangel-Guerrero; Tatiana Nunez-Garcia; Vanessa Rivero-Arredondo                                                                                                                                                                                                                                                                                                                                                                                                                                                                                                                                                                                                                                                                                                                                                                                                                                                                                                                                                                                                                                                                                                                                                                                                                                                                                                                                                                                                                                                                                                                                                                                                                                                                                                                                            |
| EPI_ISL_2342998, EPI_ISL_2492441, EPI_ISL_2492442, EPI_ISL_2492443, EPI_ISL_2492444, EPI_ISL_2492445, EPI_ISL_2492446, EPI_ISL_2492447, EPI_ISL_2492448, EPI_ISL_2492449, EPI_ISL_2492450, EPI_ISL_2492451, EPI_ISL_2492452, EPI_ISL_2492453, EPI_ISL_2492454, EPI_ISL_2492455, EPI_ISL_2492456, EPI_ISL_2492457, EPI_ISL_2492458, EPI_ISL_2492459, EPI_ISL_2492460, EPI_ISL_2492461, EPI_ISL_2492468, EPI_ISL_2492469, EPI_ISL_2492470 | see above                                                                                                      | LESP Queretaro                                                                                                                                                                                  | Instituto de Diagnostico y Referencia Epidemiologicos (INDRE)<br>Abril Rodriguez-Maldonado; Ariadna Medina-Benitez; Claudia Wong-Arambula; Ernesto Ramirez-Gonzalez.; Gisela Barrera-Badillo; Irma Lopez-Martinez; Joaquin Quiroz-Mercado; Lucia Hernandez-Rivas; Natividad Cruz-Ortiz; Sergio Rangel-Guerrero; Tatiana Nunez-Garcia; Vanessa Rivero-Arredondo                                                                                                                                                                                                                                                                                                                                                                                                                                                                                                                                                                                                                                                                                                                                                                                                                                                                                                                                                                                                                                                                                                                                                                                                                                                                                                                                                                                                                                                                                                                                                                                                                                                                           |
| EPI_ISL_3460003, EPI_ISL_3460004, EPI_ISL_3768916, EPI_ISL_3923760, EPI_ISL_3923761                                                                                                                                                                                                                                                                                                                                                     | LESP Tabasco                                                                                                   | Instituto de Diagnostico y Referencia Epidemiologicos (INDRE)                                                                                                                                   | Abril Rodriguez-Maldonado; Ariadna Medina-Benitez; Claudia Wong-Arambula; Ernesto Ramirez-Gonzalez.; Gisela Barrera-Badillo; Irma Lopez-Martinez; Joaquin Quiroz-Mercado; Lucia Hernandez-Rivas; Maribel Gonzalez-Villa; Natividad Cruz-Ortiz; Sergio Rangel-Guerrero; Tatiana Nunez-Garcia; Vanessa Rivero-Arredondo                                                                                                                                                                                                                                                                                                                                                                                                                                                                                                                                                                                                                                                                                                                                                                                                                                                                                                                                                                                                                                                                                                                                                                                                                                                                                                                                                                                                                                                                                                                                                                                                                                                                                                                    |
| EPI_ISL_2545749                                                                                                                                                                                                                                                                                                                                                                                                                         | LESP Yucatan                                                                                                   | Instituto de Diagnostico y Referencia Epidemiologicos (INDRE)                                                                                                                                   | Abril Rodriguez-Maldonado; Ariadna Medina-Benitez; Claudia Wong-Arambula; Ernesto Ramirez-Gonzalez.; Gisela Barrera-Badillo; Irma Lopez-Martinez; Joaquin Quiroz-Mercado; Lucia Hernandez-Rivas; Natividad Cruz-Ortiz; Sergio Rangel-Guerrero; Tatiana Nunez-Garcia; Vanessa Rivero-Arredondo                                                                                                                                                                                                                                                                                                                                                                                                                                                                                                                                                                                                                                                                                                                                                                                                                                                                                                                                                                                                                                                                                                                                                                                                                                                                                                                                                                                                                                                                                                                                                                                                                                                                                                                                            |
| EPI_ISL_4212138, EPI_ISL_4212147                                                                                                                                                                                                                                                                                                                                                                                                        | LSP DISTRITAL BOGOTA                                                                                           | Gencore - Universidad de los Andes                                                                                                                                                              | Alejandro Gomez; Cristian Barrera; Gabriela Ariza; Gabriela Delgado; Johana Hernandez; Luisa Sacristan; Marcela Guevara; Marcela Mercado; Silvia Restrepo                                                                                                                                                                                                                                                                                                                                                                                                                                                                                                                                                                                                                                                                                                                                                                                                                                                                                                                                                                                                                                                                                                                                                                                                                                                                                                                                                                                                                                                                                                                                                                                                                                                                                                                                                                                                                                                                                |
| EPI_ISL_2111108                                                                                                                                                                                                                                                                                                                                                                                                                         | Labor Dr. Wisplinghoff - Kaln                                                                                  | Robert Koch Institute                                                                                                                                                                           |                                                                                                                                                                                                                                                                                                                                                                                                                                                                                                                                                                                                                                                                                                                                                                                                                                                                                                                                                                                                                                                                                                                                                                                                                                                                                                                                                                                                                                                                                                                                                                                                                                                                                                                                                                                                                                                                                                                                                                                                                                          |
| EPI_ISL_1643496                                                                                                                                                                                                                                                                                                                                                                                                                         | Labor Dr. Wisplinghoff - KÁñln                                                                                 | Robert Koch Institute                                                                                                                                                                           |                                                                                                                                                                                                                                                                                                                                                                                                                                                                                                                                                                                                                                                                                                                                                                                                                                                                                                                                                                                                                                                                                                                                                                                                                                                                                                                                                                                                                                                                                                                                                                                                                                                                                                                                                                                                                                                                                                                                                                                                                                          |
| EPI_ISL_1211603, EPI_ISL_1211657, EPI_ISL_1282738                                                                                                                                                                                                                                                                                                                                                                                       | Labor Dr. Wisplinghoff - Kñln                                                                                  | Robert Koch Institute                                                                                                                                                                           |                                                                                                                                                                                                                                                                                                                                                                                                                                                                                                                                                                                                                                                                                                                                                                                                                                                                                                                                                                                                                                                                                                                                                                                                                                                                                                                                                                                                                                                                                                                                                                                                                                                                                                                                                                                                                                                                                                                                                                                                                                          |
| EPI_ISL_2969845, EPI_ISL_2975479, EPI_ISL_2975480, EPI_ISL_2975482, EPI_ISL_2975726, EPI_ISL_2975937, EPI_ISL_2975941, EPI_ISL_2976310, EPI_ISL_2976412, EPI_ISL_2976413, EPI_ISL_2976414, EPI_ISL_3207815, EPI_ISL_5873251, EPI_ISL_5891599                                                                                                                                                                                            | see above                                                                                                      | Laboratoire de sant  publique du Qu bec                                                                                                                                                         | Laboratoire de sant  publique du Qu bec<br>Guillaume Bourque; Ioannis Ragoussis; Jesse Shapiro; Mark Lathrop and Michel Roger on behalf of the CoVSeQ research group; Sandrine Moreira                                                                                                                                                                                                                                                                                                                                                                                                                                                                                                                                                                                                                                                                                                                                                                                                                                                                                                                                                                                                                                                                                                                                                                                                                                                                                                                                                                                                                                                                                                                                                                                                                                                                                                                                                                                                                                                   |
| EPI_ISL_3805724, EPI_ISL_5332881                                                                                                                                                                                                                                                                                                                                                                                                        | Laboratorio Central de Epidemiologia (LCE)                                                                     | Unidad de Genomica Avanzada                                                                                                                                                                     | ; Alejandra Garcia-Gasca; Alejandra Hernandez-Teran; Alejandro Sanchez-Flores; Alfredo Herrera-Estrella; Alicia Ocaña-Mondragón; Alicia Ocaña-Mondragón; Andreu Comas-García; Angel Gustavo Salas-Lais; Antonio Loza Roman; Bernardo Martínez-Miguel; Blanca Taboada; Brenda Irasema Maldonado-Meza; Bruno Gomez-Gil; Carla Ivon Herrera-Najera; Carlos F. Arias; Celia Boukadida; Celia Duque Molina; Celida Martínez- Rodríguez; Clara Esperanza Santacruz-Tinoco; Concepcion Grajalles-Muñiz; Concepcion Grajalles-Muñiz; Consorcio Mexicano de Vigilancia Genomica (CoVIGen-Mex). Authors (in alphabetical order); Julio Elias Alvarado-Yaah; Cristobal Chaldez-Quiroz; Daniel Fregoso-Rueda; Daniel Lira Morales; Eduardo Becerril-Vargas; Fernando Fontove-Herrera; Fidencio Mejia-Nepomuceno; Francisco Pulido; Gloria Elena Espinosa-Ayala; Gloria Maria Molina-Salinas; Gloria Vazquez; Hector Esteban Paz-Juarez; Hector Montoya-Fuentes; Helen Haydee Fernanda Ramirez-Plascencia; Irvin Gonzalez-Lopez; Jean Pierre Gonzalez; Jesus Hernandez; Joel Armando Vazquez-Perez.; Jorge Salas-Hernandez; Jose Antonio Enciso-Moreno; Jose Arturo Martinez-Orozco; Jose Esteban Muñoz-oz-Medina; Jose Esteban Muñoz-Medina; Jose de Jesus Nuñez-Contreras; Jose de Jesus Nuñez-Contreras; Juan Bautista Chale-Dzul; Julissa Enciso-Ibarra; Luis Alberto Ochoa-Carrera; Margarita Matias-Florentino; Maria Guadalupe Santiago-Mauricio; Maria Guadalupe de Jesus Mireles-Rivera; Mario Mujica-Sanchez; Marissa Perez-Garcia; Nelly Selem-Mojica; Pavel Isa; Ricardo Ciria Contreras; Jose de Jesus Nuñez-Contreras; Juan Bautista Chale-Dzul; Julissa Enciso-Ibarra; Luis Alberto Ochoa-Carrera; Margarita Matias-Florentino; Maria Guadalupe Santiago-Mauricio; Maria Guadalupe de Jesus Mireles-Rivera; Nelly Selem-Mojica; Pavel Isa; Ricardo Ciria Merce; Ricardo Grande; Rosa Maria Gutierrez Rios; Santiago avila-Rios; Selene Zarate; Susana Lopez; Veronica Mata-Haro; Victor Eduardo Garcia-Arias; Victor Hugo Borja-Aburto |
| EPI_ISL_3347563, EPI_ISL_3347564, EPI_ISL_4006499                                                                                                                                                                                                                                                                                                                                                                                       | Laboratorio Central de Epidemiologia (LCE)                                                                     | Instituto de Biotecnología de la UNAM                                                                                                                                                           | ; Alejandra García-Gasca; Alejandra Hernández-Terán; Alejandro Herrera-Estrella; Alfredo Herrera-Estrella; Alicia Ocaña-Mondragón; Andreu Comas-García; Angel Gustavo Salas-Lais; Antonio Loza Román; Bernardo Martínez-Miguel; Blanca Taboada; Brenda Irasema Maldonado-Meza; Bruno Gómez-Gil; Carla Ivón Herrera-Najera; Carlos F. Arias; Celia Boukadida; Clara Esperanza Santacruz-Tinoco; Concepción Grajalles-Muñiz; Consorcio Mexicano de Vigilancia Genómica (CoVIGen-Mex). Authors (in alphabetical order); Julio Elias Alvarado-Yaah; Cristóbal Cháidez-Quiroz; Célida Duque Molina; Célida Martínez- Rodríguez; Daniel Fregoso-Rueda; Daniel Lira Morales; Eduardo Becerril-Vargas; Fernando Fontove-Herrera; Fidencio Mejía-Nepomuceno; Francisco Pulido; Gloria Elena Espinosa-Ayala; Gloria Maria Molina-Salinas; Gloria Vazquez; Hector Esteban Paz-Juárez; Hector Montoya-Fuentes; Helen Haydee Fernanda Ramirez-Plascencia; Irvin González-López; Jean Pierre González; Jesús Hernández; Joel Armando Vázquez-Pérez.; Jorge Salas-Hernández; José Antonio Enciso-Moreno; José Arturo Martínez-Orozco; José Esteban Muñoz-Medina; José de Jesús Nuñez-Contreras; Juan Bautista Chale-Dzul; Julissa Enciso-Ibarra; Kathia Elizabeth Tapia-Díaz; Luis Alberto Ochoa-Carrera; Margarita Matias-Florentino; Mario Mújica-Sánchez; Marissa Pérez-García; Pavel Isa; Ricardo Ciria Merce; Ricardo Grande; Rosa María Gutiérrez Ríos; Santiago Avila-Ríos; Selene Zárate; Susana Lopez; Verónica Mata-Haro; Victor Eduardo García-Arias; Victor Hugo Borja-Aburto                                                                                                                                                                                                                                                                                                                                                                                                                                                               |
| EPI_ISL_3914321                                                                                                                                                                                                                                                                                                                                                                                                                         | Laboratorio Central de Saude Publica do Estado do Parana (Instituto de Biologia Molecular do Paraná (LACEN-PR) | Instituto Carlos Chagas - Fiocruz                                                                                                                                                               | Alessandra De Melo Aguiar; Andreia Akemi Suzukawa; Andréa Rodrigues Ávila; Bruno Dallagiovanna; Dailla Zanette; Eduardo Baisanelli; Emanuel Maltempi de Souza; Fabio Passetti; Fabricio Klerynton Marchini; Fábio de Oliveira Pedrosa; Guilherme Becker; Helisson Faoro; Helen Geremias dos Santos; Irina Nastassja Riediger; Letusa Albrecht; Lucas Blanes; Luis Gustavo Morelli; Lysangela Ronalte Alves; Maria do Carmo Debur; Mauro de Medeiros Oliveira; Michelle Orane Schemberger; Paola Cristina Resende; Sheila Cristina Nardeli; Tiago Gräf; Valter Antônio de Baura                                                                                                                                                                                                                                                                                                                                                                                                                                                                                                                                                                                                                                                                                                                                                                                                                                                                                                                                                                                                                                                                                                                                                                                                                                                                                                                                                                                                                                                           |
| EPI_ISL_3751412                                                                                                                                                                                                                                                                                                                                                                                                                         | Laboratorio Central de Saude Publica do Estado do Rio Grande do Sul (LACEN-RS)                                 | Laboratory of Respiratory Viruses and Measles, Oswaldo Cruz Institute, FIOCRUZ                                                                                                                  | Alice Sampaio Rocha; Ana Carolina Mendonca; Anderson Brandao Leite; Anna Carolina Paixao; Elisa Cavalcante Pereira; Fernando Motta; Luciana Appolinario; Marilda Siqueira on behalf of the FioCruz COVID-19 Genomic Surveillance Network; Paola Resende; Renata Serrano Lopes; Taina Venas                                                                                                                                                                                                                                                                                                                                                                                                                                                                                                                                                                                                                                                                                                                                                                                                                                                                                                                                                                                                                                                                                                                                                                                                                                                                                                                                                                                                                                                                                                                                                                                                                                                                                                                                               |
| EPI_ISL_2271701                                                                                                                                                                                                                                                                                                                                                                                                                         | Laboratorio Central, Ministerio de Salud Cordoba                                                               | Instituto de Patologia Vegetal (CIAP-INTA) on behalf of 'Proyecto Argentino Interinstitucional de genómica de SARS-CoV-2' (PAIS Consortium)                                                     | Barbas, G.; Castro, G.; Debat, HJ.; FD; Fernandez; M; M.B.; Marquez, N.; Pisano; Re, V.                                                                                                                                                                                                                                                                                                                                                                                                                                                                                                                                                                                                                                                                                                                                                                                                                                                                                                                                                                                                                                                                                                                                                                                                                                                                                                                                                                                                                                                                                                                                                                                                                                                                                                                                                                                                                                                                                                                                                  |

|                                                                                                                                                                                                                                                                                                                                                                                                                                                                                                                                                                                                                                                                                                                                                                                                                                                                                                                                                                                                                                                                                                                                                                                                                                                                                                                                                                                                                                                                                                                                                                                                                                                                                                                                                                                                                                                                                                                                                                                                                                                                                                                                                                                                                                                                                                                                                                                                                                                                                                                                                                                                                                                                                                                                                                                                                                                                                                                                                                                                                                                                                                                                                                                                                                                                                                                                                                                                                                                                                                                                                                                                                                                                                                                                                                                                                                                                                                                                                                                                                                                                                                                                                                                                                                                                                                                                                                                                                                                                                                                                                                                                                                                                                                                                                                                                                                                                                                                                                                                                                                                                                                                                                                                                                                                                                                                                                                                                                                                                                                                                                                                                                                                                                                                                                                                                                                                                                                                                                                                                                                                                                                                                                                                                                                                                                                                                                                                                                                                                                                                                                                                                                                                                                                                                                                                                                                                                                                                                                                                                                                                                                                                                                                                                                                                                                                                                                                                                                                                                                                                                                                                                                                                                                                                                                                                                                                                                                                                                                                                                                                                                                                                                                                                                                                                                                                                                                                                                                                                                                                                                                                                                                                                                                                                                                                                                                                                                                                                                                                                                                                                                                                                                                                                                                                                                                                                                                                                                                                                                                                                                                                                                                                                                                                                                                                                                                                                                                                                                                                                                                                                                                                                                                                                                                                                                                                                                                                                                                                                                                                                                                                                                                                                                                                                                                                                                                                                                                                                                                                                                                                                                                                                                                                                                                                                                                                                                                                                                                                                                                                                                                                                                                                                                                                                                                                                                                                                                                                                                                                                                                                                                                                                                                                                                                                                                                                                                                                                                                                                                                                                                                                                                                                                                                                                                                                                                                                                                                                                                                                                                                                                                                                                                                                                                                                                                                                                                                       |                                                                                                                                                                |                                                                                                                                                                                                                                                                                                                                                                                                                         |                                                                                                                                                                                                                                                                                                                                                                                                                                                                                                                              |
|-------------------------------------------------------------------------------------------------------------------------------------------------------------------------------------------------------------------------------------------------------------------------------------------------------------------------------------------------------------------------------------------------------------------------------------------------------------------------------------------------------------------------------------------------------------------------------------------------------------------------------------------------------------------------------------------------------------------------------------------------------------------------------------------------------------------------------------------------------------------------------------------------------------------------------------------------------------------------------------------------------------------------------------------------------------------------------------------------------------------------------------------------------------------------------------------------------------------------------------------------------------------------------------------------------------------------------------------------------------------------------------------------------------------------------------------------------------------------------------------------------------------------------------------------------------------------------------------------------------------------------------------------------------------------------------------------------------------------------------------------------------------------------------------------------------------------------------------------------------------------------------------------------------------------------------------------------------------------------------------------------------------------------------------------------------------------------------------------------------------------------------------------------------------------------------------------------------------------------------------------------------------------------------------------------------------------------------------------------------------------------------------------------------------------------------------------------------------------------------------------------------------------------------------------------------------------------------------------------------------------------------------------------------------------------------------------------------------------------------------------------------------------------------------------------------------------------------------------------------------------------------------------------------------------------------------------------------------------------------------------------------------------------------------------------------------------------------------------------------------------------------------------------------------------------------------------------------------------------------------------------------------------------------------------------------------------------------------------------------------------------------------------------------------------------------------------------------------------------------------------------------------------------------------------------------------------------------------------------------------------------------------------------------------------------------------------------------------------------------------------------------------------------------------------------------------------------------------------------------------------------------------------------------------------------------------------------------------------------------------------------------------------------------------------------------------------------------------------------------------------------------------------------------------------------------------------------------------------------------------------------------------------------------------------------------------------------------------------------------------------------------------------------------------------------------------------------------------------------------------------------------------------------------------------------------------------------------------------------------------------------------------------------------------------------------------------------------------------------------------------------------------------------------------------------------------------------------------------------------------------------------------------------------------------------------------------------------------------------------------------------------------------------------------------------------------------------------------------------------------------------------------------------------------------------------------------------------------------------------------------------------------------------------------------------------------------------------------------------------------------------------------------------------------------------------------------------------------------------------------------------------------------------------------------------------------------------------------------------------------------------------------------------------------------------------------------------------------------------------------------------------------------------------------------------------------------------------------------------------------------------------------------------------------------------------------------------------------------------------------------------------------------------------------------------------------------------------------------------------------------------------------------------------------------------------------------------------------------------------------------------------------------------------------------------------------------------------------------------------------------------------------------------------------------------------------------------------------------------------------------------------------------------------------------------------------------------------------------------------------------------------------------------------------------------------------------------------------------------------------------------------------------------------------------------------------------------------------------------------------------------------------------------------------------------------------------------------------------------------------------------------------------------------------------------------------------------------------------------------------------------------------------------------------------------------------------------------------------------------------------------------------------------------------------------------------------------------------------------------------------------------------------------------------------------------------------------------------------------------------------------------------------------------------------------------------------------------------------------------------------------------------------------------------------------------------------------------------------------------------------------------------------------------------------------------------------------------------------------------------------------------------------------------------------------------------------------------------------------------------------------------------------------------------------------------------------------------------------------------------------------------------------------------------------------------------------------------------------------------------------------------------------------------------------------------------------------------------------------------------------------------------------------------------------------------------------------------------------------------------------------------------------------------------------------------------------------------------------------------------------------------------------------------------------------------------------------------------------------------------------------------------------------------------------------------------------------------------------------------------------------------------------------------------------------------------------------------------------------------------------------------------------------------------------------------------------------------------------------------------------------------------------------------------------------------------------------------------------------------------------------------------------------------------------------------------------------------------------------------------------------------------------------------------------------------------------------------------------------------------------------------------------------------------------------------------------------------------------------------------------------------------------------------------------------------------------------------------------------------------------------------------------------------------------------------------------------------------------------------------------------------------------------------------------------------------------------------------------------------------------------------------------------------------------------------------------------------------------------------------------------------------------------------------------------------------------------------------------------------------------------------------------------------------------------------------------------------------------------------------------------------------------------------------------------------------------------------------------------------------------------------------------------------------------------------------------------------------------------------------------------------------------------------------------------------------------------------------------------------------------------------------------------------------------------------------------------------------------------------------------------------------------------------------------------------------------------------------------------------------------------------------------------------------------------------------------------------------------------------------------------------------------------------------------------------------------------------------------------------------------------------------------------------------------------------------------------------------------------------------------------------------------------------------------------------------------------------------------------------------------------------------------------------------------------------------------------------------------------------------------------------------------------------------------------------------------------------------------------------------------------------------------------------------------------------------------------------------------------------------------------------------------------------------------------------------------------------------------------------------------------------------------------------------------------------------------------------------------------------------------------------------------------------------------------------------------------------------------------------------------------------------------------------------------------------------------------------------------------------------------------------------------------------------------------------------------------------------------------------------------------------------------------------------------------------------------------------------------------------------------------------------------------------------------------------------------------------------------------------------------------------------------------------------------------------------------------------------------------------------------------------------------------------------------------------------------------------------------------------------------------------------------------------------------------------------------------------------------------------------------------------------------------------------------------------------------------------------------------------------------------------------------------------------------------------------------------------------------------|----------------------------------------------------------------------------------------------------------------------------------------------------------------|-------------------------------------------------------------------------------------------------------------------------------------------------------------------------------------------------------------------------------------------------------------------------------------------------------------------------------------------------------------------------------------------------------------------------|------------------------------------------------------------------------------------------------------------------------------------------------------------------------------------------------------------------------------------------------------------------------------------------------------------------------------------------------------------------------------------------------------------------------------------------------------------------------------------------------------------------------------|
| EPI_ISL_2007530,<br>EPI_ISL_2007539,<br>EPI_ISL_2007540,<br>EPI_ISL_2007541,<br>EPI_ISL_2007542,<br>EPI_ISL_4003468                                                                                                                                                                                                                                                                                                                                                                                                                                                                                                                                                                                                                                                                                                                                                                                                                                                                                                                                                                                                                                                                                                                                                                                                                                                                                                                                                                                                                                                                                                                                                                                                                                                                                                                                                                                                                                                                                                                                                                                                                                                                                                                                                                                                                                                                                                                                                                                                                                                                                                                                                                                                                                                                                                                                                                                                                                                                                                                                                                                                                                                                                                                                                                                                                                                                                                                                                                                                                                                                                                                                                                                                                                                                                                                                                                                                                                                                                                                                                                                                                                                                                                                                                                                                                                                                                                                                                                                                                                                                                                                                                                                                                                                                                                                                                                                                                                                                                                                                                                                                                                                                                                                                                                                                                                                                                                                                                                                                                                                                                                                                                                                                                                                                                                                                                                                                                                                                                                                                                                                                                                                                                                                                                                                                                                                                                                                                                                                                                                                                                                                                                                                                                                                                                                                                                                                                                                                                                                                                                                                                                                                                                                                                                                                                                                                                                                                                                                                                                                                                                                                                                                                                                                                                                                                                                                                                                                                                                                                                                                                                                                                                                                                                                                                                                                                                                                                                                                                                                                                                                                                                                                                                                                                                                                                                                                                                                                                                                                                                                                                                                                                                                                                                                                                                                                                                                                                                                                                                                                                                                                                                                                                                                                                                                                                                                                                                                                                                                                                                                                                                                                                                                                                                                                                                                                                                                                                                                                                                                                                                                                                                                                                                                                                                                                                                                                                                                                                                                                                                                                                                                                                                                                                                                                                                                                                                                                                                                                                                                                                                                                                                                                                                                                                                                                                                                                                                                                                                                                                                                                                                                                                                                                                                                                                                                                                                                                                                                                                                                                                                                                                                                                                                                                                                                                                                                                                                                                                                                                                                                                                                                                                                                                                                                                                                                                   | Laboratorio Central,<br>Ministerio de Salud Córdoba                                                                                                            | Instituto de Patología Vegetal (CIAP-INTA) on behalf of 'Proyecto Argentino Interinstitucional de genómica de SARS-CoV-2' (PAIS Consortium)                                                                                                                                                                                                                                                                             | A; Amadio; Barbas, G.; Castro, G.; Debat, HJ.; FD; Fernández; Irazoqui; M; M.B.; Marquez, N.; Pisano; Re, V.                                                                                                                                                                                                                                                                                                                                                                                                                 |
| EPI_ISL_3346555                                                                                                                                                                                                                                                                                                                                                                                                                                                                                                                                                                                                                                                                                                                                                                                                                                                                                                                                                                                                                                                                                                                                                                                                                                                                                                                                                                                                                                                                                                                                                                                                                                                                                                                                                                                                                                                                                                                                                                                                                                                                                                                                                                                                                                                                                                                                                                                                                                                                                                                                                                                                                                                                                                                                                                                                                                                                                                                                                                                                                                                                                                                                                                                                                                                                                                                                                                                                                                                                                                                                                                                                                                                                                                                                                                                                                                                                                                                                                                                                                                                                                                                                                                                                                                                                                                                                                                                                                                                                                                                                                                                                                                                                                                                                                                                                                                                                                                                                                                                                                                                                                                                                                                                                                                                                                                                                                                                                                                                                                                                                                                                                                                                                                                                                                                                                                                                                                                                                                                                                                                                                                                                                                                                                                                                                                                                                                                                                                                                                                                                                                                                                                                                                                                                                                                                                                                                                                                                                                                                                                                                                                                                                                                                                                                                                                                                                                                                                                                                                                                                                                                                                                                                                                                                                                                                                                                                                                                                                                                                                                                                                                                                                                                                                                                                                                                                                                                                                                                                                                                                                                                                                                                                                                                                                                                                                                                                                                                                                                                                                                                                                                                                                                                                                                                                                                                                                                                                                                                                                                                                                                                                                                                                                                                                                                                                                                                                                                                                                                                                                                                                                                                                                                                                                                                                                                                                                                                                                                                                                                                                                                                                                                                                                                                                                                                                                                                                                                                                                                                                                                                                                                                                                                                                                                                                                                                                                                                                                                                                                                                                                                                                                                                                                                                                                                                                                                                                                                                                                                                                                                                                                                                                                                                                                                                                                                                                                                                                                                                                                                                                                                                                                                                                                                                                                                                                                                                                                                                                                                                                                                                                                                                                                                                                                                                                                                                                                       | Laboratorio Clínico Gamma                                                                                                                                      | MELISA Institute Genomics and Proteomics SpA                                                                                                                                                                                                                                                                                                                                                                            | Cristian Vargas; Elard Koch; Francisco Alvarez; Guillermo Nourdin; Mauricio Hernandez                                                                                                                                                                                                                                                                                                                                                                                                                                        |
| EPI_ISL_4196171                                                                                                                                                                                                                                                                                                                                                                                                                                                                                                                                                                                                                                                                                                                                                                                                                                                                                                                                                                                                                                                                                                                                                                                                                                                                                                                                                                                                                                                                                                                                                                                                                                                                                                                                                                                                                                                                                                                                                                                                                                                                                                                                                                                                                                                                                                                                                                                                                                                                                                                                                                                                                                                                                                                                                                                                                                                                                                                                                                                                                                                                                                                                                                                                                                                                                                                                                                                                                                                                                                                                                                                                                                                                                                                                                                                                                                                                                                                                                                                                                                                                                                                                                                                                                                                                                                                                                                                                                                                                                                                                                                                                                                                                                                                                                                                                                                                                                                                                                                                                                                                                                                                                                                                                                                                                                                                                                                                                                                                                                                                                                                                                                                                                                                                                                                                                                                                                                                                                                                                                                                                                                                                                                                                                                                                                                                                                                                                                                                                                                                                                                                                                                                                                                                                                                                                                                                                                                                                                                                                                                                                                                                                                                                                                                                                                                                                                                                                                                                                                                                                                                                                                                                                                                                                                                                                                                                                                                                                                                                                                                                                                                                                                                                                                                                                                                                                                                                                                                                                                                                                                                                                                                                                                                                                                                                                                                                                                                                                                                                                                                                                                                                                                                                                                                                                                                                                                                                                                                                                                                                                                                                                                                                                                                                                                                                                                                                                                                                                                                                                                                                                                                                                                                                                                                                                                                                                                                                                                                                                                                                                                                                                                                                                                                                                                                                                                                                                                                                                                                                                                                                                                                                                                                                                                                                                                                                                                                                                                                                                                                                                                                                                                                                                                                                                                                                                                                                                                                                                                                                                                                                                                                                                                                                                                                                                                                                                                                                                                                                                                                                                                                                                                                                                                                                                                                                                                                                                                                                                                                                                                                                                                                                                                                                                                                                                                                                                                       | Laboratorio MICROBIOM                                                                                                                                          | Laboratorio Central Mg. Luis Alfredo Pianciola on behalf of 'Proyecto Argentino Interinstitucional de genómica de SARS-CoV-2' (PAIS Consortium)                                                                                                                                                                                                                                                                         | C Pintos; C Rastellini; C Ziehm; J Ousset; L Pianciola; M Fernandez; M Mazzeo; S Cecchi.                                                                                                                                                                                                                                                                                                                                                                                                                                     |
| EPI_ISL_5264657                                                                                                                                                                                                                                                                                                                                                                                                                                                                                                                                                                                                                                                                                                                                                                                                                                                                                                                                                                                                                                                                                                                                                                                                                                                                                                                                                                                                                                                                                                                                                                                                                                                                                                                                                                                                                                                                                                                                                                                                                                                                                                                                                                                                                                                                                                                                                                                                                                                                                                                                                                                                                                                                                                                                                                                                                                                                                                                                                                                                                                                                                                                                                                                                                                                                                                                                                                                                                                                                                                                                                                                                                                                                                                                                                                                                                                                                                                                                                                                                                                                                                                                                                                                                                                                                                                                                                                                                                                                                                                                                                                                                                                                                                                                                                                                                                                                                                                                                                                                                                                                                                                                                                                                                                                                                                                                                                                                                                                                                                                                                                                                                                                                                                                                                                                                                                                                                                                                                                                                                                                                                                                                                                                                                                                                                                                                                                                                                                                                                                                                                                                                                                                                                                                                                                                                                                                                                                                                                                                                                                                                                                                                                                                                                                                                                                                                                                                                                                                                                                                                                                                                                                                                                                                                                                                                                                                                                                                                                                                                                                                                                                                                                                                                                                                                                                                                                                                                                                                                                                                                                                                                                                                                                                                                                                                                                                                                                                                                                                                                                                                                                                                                                                                                                                                                                                                                                                                                                                                                                                                                                                                                                                                                                                                                                                                                                                                                                                                                                                                                                                                                                                                                                                                                                                                                                                                                                                                                                                                                                                                                                                                                                                                                                                                                                                                                                                                                                                                                                                                                                                                                                                                                                                                                                                                                                                                                                                                                                                                                                                                                                                                                                                                                                                                                                                                                                                                                                                                                                                                                                                                                                                                                                                                                                                                                                                                                                                                                                                                                                                                                                                                                                                                                                                                                                                                                                                                                                                                                                                                                                                                                                                                                                                                                                                                                                                                                                       | Laboratorio Nacional de Salud Publica                                                                                                                          | Incienza, Instituto Costarricense de Investigación y Enseñanza en Nutrición y Salud                                                                                                                                                                                                                                                                                                                                     | Carlos Guerra; Denis Jovel; Laboratorio de Genómica INCIENSA; Ruth Vasquez                                                                                                                                                                                                                                                                                                                                                                                                                                                   |
| EPI_ISL_3045401,<br>EPI_ISL_3045411,<br>EPI_ISL_3045414,<br>EPI_ISL_4220360                                                                                                                                                                                                                                                                                                                                                                                                                                                                                                                                                                                                                                                                                                                                                                                                                                                                                                                                                                                                                                                                                                                                                                                                                                                                                                                                                                                                                                                                                                                                                                                                                                                                                                                                                                                                                                                                                                                                                                                                                                                                                                                                                                                                                                                                                                                                                                                                                                                                                                                                                                                                                                                                                                                                                                                                                                                                                                                                                                                                                                                                                                                                                                                                                                                                                                                                                                                                                                                                                                                                                                                                                                                                                                                                                                                                                                                                                                                                                                                                                                                                                                                                                                                                                                                                                                                                                                                                                                                                                                                                                                                                                                                                                                                                                                                                                                                                                                                                                                                                                                                                                                                                                                                                                                                                                                                                                                                                                                                                                                                                                                                                                                                                                                                                                                                                                                                                                                                                                                                                                                                                                                                                                                                                                                                                                                                                                                                                                                                                                                                                                                                                                                                                                                                                                                                                                                                                                                                                                                                                                                                                                                                                                                                                                                                                                                                                                                                                                                                                                                                                                                                                                                                                                                                                                                                                                                                                                                                                                                                                                                                                                                                                                                                                                                                                                                                                                                                                                                                                                                                                                                                                                                                                                                                                                                                                                                                                                                                                                                                                                                                                                                                                                                                                                                                                                                                                                                                                                                                                                                                                                                                                                                                                                                                                                                                                                                                                                                                                                                                                                                                                                                                                                                                                                                                                                                                                                                                                                                                                                                                                                                                                                                                                                                                                                                                                                                                                                                                                                                                                                                                                                                                                                                                                                                                                                                                                                                                                                                                                                                                                                                                                                                                                                                                                                                                                                                                                                                                                                                                                                                                                                                                                                                                                                                                                                                                                                                                                                                                                                                                                                                                                                                                                                                                                                                                                                                                                                                                                                                                                                                                                                                                                                                                                                                                                           | Laboratorio Nacional de Salud Pública Dr. Defillio - LNSPDD                                                                                                    | Laboratory of Respiratory Viruses and Measles, Oswaldo Cruz Institute, FIOCRUZ                                                                                                                                                                                                                                                                                                                                          | ; Alice Sampaio Rocha; Ana Beatriz Machado Lima; Ana Carolina Mendonca; Anna Carolina Paixao; Elisa Cavalcante Pereira; Fernando Motta; Grey Benoit Vasquez; Isaac Miguel Sanchez; Ivonne Imbert; Lucia de la Cruz; Luciana Appolinario; Luiz Fernando Lopez Tort; Marilda Siqueira on behalf of the Fiocruz COVID-19 Genomic Surveillance Network; Mia Ferreira de Araujo; Natália Valente da Silva; Nuryrs de Castro; Paola Resende; Renata Serrano Lopes; Ronald Skewes; Taina Venas; Thayssa Keren Santos da Silva Neves |
| EPI_ISL_6121576                                                                                                                                                                                                                                                                                                                                                                                                                                                                                                                                                                                                                                                                                                                                                                                                                                                                                                                                                                                                                                                                                                                                                                                                                                                                                                                                                                                                                                                                                                                                                                                                                                                                                                                                                                                                                                                                                                                                                                                                                                                                                                                                                                                                                                                                                                                                                                                                                                                                                                                                                                                                                                                                                                                                                                                                                                                                                                                                                                                                                                                                                                                                                                                                                                                                                                                                                                                                                                                                                                                                                                                                                                                                                                                                                                                                                                                                                                                                                                                                                                                                                                                                                                                                                                                                                                                                                                                                                                                                                                                                                                                                                                                                                                                                                                                                                                                                                                                                                                                                                                                                                                                                                                                                                                                                                                                                                                                                                                                                                                                                                                                                                                                                                                                                                                                                                                                                                                                                                                                                                                                                                                                                                                                                                                                                                                                                                                                                                                                                                                                                                                                                                                                                                                                                                                                                                                                                                                                                                                                                                                                                                                                                                                                                                                                                                                                                                                                                                                                                                                                                                                                                                                                                                                                                                                                                                                                                                                                                                                                                                                                                                                                                                                                                                                                                                                                                                                                                                                                                                                                                                                                                                                                                                                                                                                                                                                                                                                                                                                                                                                                                                                                                                                                                                                                                                                                                                                                                                                                                                                                                                                                                                                                                                                                                                                                                                                                                                                                                                                                                                                                                                                                                                                                                                                                                                                                                                                                                                                                                                                                                                                                                                                                                                                                                                                                                                                                                                                                                                                                                                                                                                                                                                                                                                                                                                                                                                                                                                                                                                                                                                                                                                                                                                                                                                                                                                                                                                                                                                                                                                                                                                                                                                                                                                                                                                                                                                                                                                                                                                                                                                                                                                                                                                                                                                                                                                                                                                                                                                                                                                                                                                                                                                                                                                                                                                                                                       | Laboratorio de Alta Complejidad (LACMI), Instituto de Genética Humana (IgeHM) Parque de la Salud de la Provincia de Misiones, Universidad Nacional de Misiones | Grupo de Genómica y Bioinformática del Instituto de Investigación de la Cadena Láctea CONICET-INTA on behalf of 'Proyecto Argentino Interinstitucional de genómica de SARS-CoV-2' (PAIS Consortium)                                                                                                                                                                                                                     | AF; Aguirre; Amadio; Benitez; C; D; Eberhardt; Fontana; G; Gamarra; Gonzales; Irazoqui; JM; K; Ludojiski; M; MF; R; Salvatierra; Silva; TA; Urquiza; Vogel                                                                                                                                                                                                                                                                                                                                                                   |
| EPI_ISL_4503176,<br>EPI_ISL_4820972,<br>EPI_ISL_4820974                                                                                                                                                                                                                                                                                                                                                                                                                                                                                                                                                                                                                                                                                                                                                                                                                                                                                                                                                                                                                                                                                                                                                                                                                                                                                                                                                                                                                                                                                                                                                                                                                                                                                                                                                                                                                                                                                                                                                                                                                                                                                                                                                                                                                                                                                                                                                                                                                                                                                                                                                                                                                                                                                                                                                                                                                                                                                                                                                                                                                                                                                                                                                                                                                                                                                                                                                                                                                                                                                                                                                                                                                                                                                                                                                                                                                                                                                                                                                                                                                                                                                                                                                                                                                                                                                                                                                                                                                                                                                                                                                                                                                                                                                                                                                                                                                                                                                                                                                                                                                                                                                                                                                                                                                                                                                                                                                                                                                                                                                                                                                                                                                                                                                                                                                                                                                                                                                                                                                                                                                                                                                                                                                                                                                                                                                                                                                                                                                                                                                                                                                                                                                                                                                                                                                                                                                                                                                                                                                                                                                                                                                                                                                                                                                                                                                                                                                                                                                                                                                                                                                                                                                                                                                                                                                                                                                                                                                                                                                                                                                                                                                                                                                                                                                                                                                                                                                                                                                                                                                                                                                                                                                                                                                                                                                                                                                                                                                                                                                                                                                                                                                                                                                                                                                                                                                                                                                                                                                                                                                                                                                                                                                                                                                                                                                                                                                                                                                                                                                                                                                                                                                                                                                                                                                                                                                                                                                                                                                                                                                                                                                                                                                                                                                                                                                                                                                                                                                                                                                                                                                                                                                                                                                                                                                                                                                                                                                                                                                                                                                                                                                                                                                                                                                                                                                                                                                                                                                                                                                                                                                                                                                                                                                                                                                                                                                                                                                                                                                                                                                                                                                                                                                                                                                                                                                                                                                                                                                                                                                                                                                                                                                                                                                                                                                                                                                               | Laboratorio de Biología Molecular de la Universidad Nacional de San Agustín de Arequipa                                                                        | Laboratorio de Recursos Genéticos y Genética Molecular de la Universidad Nacional de San Agustín de Arequipa                                                                                                                                                                                                                                                                                                            | Alejandra Dávila; Guillermo Salvatierra; Jorge Ballón; Kasandra Ascuña; Pablo Tsukayama; Patrick Fernández; Renzo Salazar; Rosario Valderrama; Sandro Condoni                                                                                                                                                                                                                                                                                                                                                                |
| EPI_ISL_4405149                                                                                                                                                                                                                                                                                                                                                                                                                                                                                                                                                                                                                                                                                                                                                                                                                                                                                                                                                                                                                                                                                                                                                                                                                                                                                                                                                                                                                                                                                                                                                                                                                                                                                                                                                                                                                                                                                                                                                                                                                                                                                                                                                                                                                                                                                                                                                                                                                                                                                                                                                                                                                                                                                                                                                                                                                                                                                                                                                                                                                                                                                                                                                                                                                                                                                                                                                                                                                                                                                                                                                                                                                                                                                                                                                                                                                                                                                                                                                                                                                                                                                                                                                                                                                                                                                                                                                                                                                                                                                                                                                                                                                                                                                                                                                                                                                                                                                                                                                                                                                                                                                                                                                                                                                                                                                                                                                                                                                                                                                                                                                                                                                                                                                                                                                                                                                                                                                                                                                                                                                                                                                                                                                                                                                                                                                                                                                                                                                                                                                                                                                                                                                                                                                                                                                                                                                                                                                                                                                                                                                                                                                                                                                                                                                                                                                                                                                                                                                                                                                                                                                                                                                                                                                                                                                                                                                                                                                                                                                                                                                                                                                                                                                                                                                                                                                                                                                                                                                                                                                                                                                                                                                                                                                                                                                                                                                                                                                                                                                                                                                                                                                                                                                                                                                                                                                                                                                                                                                                                                                                                                                                                                                                                                                                                                                                                                                                                                                                                                                                                                                                                                                                                                                                                                                                                                                                                                                                                                                                                                                                                                                                                                                                                                                                                                                                                                                                                                                                                                                                                                                                                                                                                                                                                                                                                                                                                                                                                                                                                                                                                                                                                                                                                                                                                                                                                                                                                                                                                                                                                                                                                                                                                                                                                                                                                                                                                                                                                                                                                                                                                                                                                                                                                                                                                                                                                                                                                                                                                                                                                                                                                                                                                                                                                                                                                                                                                                       | Laboratorio de Biología molecular del Hospital General de Agudos Dr. Carlos G. Durand                                                                          | Área de Secuenciación del Laboratorio de Virología del Hospital de Niños Dr. Ricardo Gutiérrez on behalf of 'Proyecto Argentino Interinstitucional de genómica de SARS-CoV-2' (PAIS Consortium)                                                                                                                                                                                                                         | A; Acuña; Anzorena; B; C; Carrón; Castro; Cañellas; Chiussi; Colina; Costa; D; Dahinten; Dima; Dominguez; E; Elsegood; F; Frisone; G; Gatica; Goya; Irazzábal; Jurado; L; LE; Leivas; Loayza; Lusso; M; MB; MF; MI; MS; Marchisio; Marina; Matillas; N; Nabees Jodar; Narduzzi; Natale; Notaristéfano; R; Rivarola; Rodriguez Cardozo; Rodríguez Saá; Rozo; S; Theaux; Valinotto; Viegas, M.; W; Warszatska; Y; Yanguzian                                                                                                    |
| EPI_ISL_2728543, EPI_ISL_2728555, EPI_ISL_2728560, EPI_ISL_2728562, EPI_ISL_2728577, EPI_ISL_3066992, EPI_ISL_3066993, EPI_ISL_3066996, EPI_ISL_3067018, EPI_ISL_3067019, EPI_ISL_3067024, EPI_ISL_3067051, EPI_ISL_3067052, EPI_ISL_3067053, EPI_ISL_3067054, EPI_ISL_3067055, EPI_ISL_3067056, EPI_ISL_3067060, EPI_ISL_3133671, EPI_ISL_3133675, EPI_ISL_3133691, EPI_ISL_3133697, EPI_ISL_3133701, EPI_ISL_3133706, EPI_ISL_3133709, EPI_ISL_3133710, EPI_ISL_3321108, EPI_ISL_3321268, EPI_ISL_3321269, EPI_ISL_3321275, EPI_ISL_3321279, EPI_ISL_3321280, EPI_ISL_3321281, EPI_ISL_3321282, EPI_ISL_3321284, EPI_ISL_3321287, EPI_ISL_3321288, EPI_ISL_3321290, EPI_ISL_3332893, EPI_ISL_3370445, EPI_ISL_3370448, EPI_ISL_3370452, EPI_ISL_3370453, EPI_ISL_3370454, EPI_ISL_3370455, EPI_ISL_3535732, EPI_ISL_3535736, EPI_ISL_3535752, EPI_ISL_3642584, EPI_ISL_3642585, EPI_ISL_3785938, EPI_ISL_3785942, EPI_ISL_3944418, EPI_ISL_3944419, EPI_ISL_4890149, EPI_ISL_5144808                                                                                                                                                                                                                                                                                                                                                                                                                                                                                                                                                                                                                                                                                                                                                                                                                                                                                                                                                                                                                                                                                                                                                                                                                                                                                                                                                                                                                                                                                                                                                                                                                                                                                                                                                                                                                                                                                                                                                                                                                                                                                                                                                                                                                                                                                                                                                                                                                                                                                                                                                                                                                                                                                                                                                                                                                                                                                                                                                                                                                                                                                                                                                                                                                                                                                                                                                                                                                                                                                                                                                                                                                                                                                                                                                                                                                                                                                                                                                                                                                                                                                                                                                                                                                                                                                                                                                                                                                                                                                                                                                                                                                                                                                                                                                                                                                                                                                                                                                                                                                                                                                                                                                                                                                                                                                                                                                                                                                                                                                                                                                                                                                                                                                                                                                                                                                                                                                                                                                                                                                                                                                                                                                                                                                                                                                                                                                                                                                                                                                                                                                                                                                                                                                                                                                                                                                                                                                                                                                                                                                                                                                                                                                                                                                                                                                                                                                                                                                                                                                                                                                                                                                                                                                                                                                                                                                                                                                                                                                                                                                                                                                                                                                                                                                                                                                                                                                                                                                                                                                                                                                                                                                                                                                                                                                                                                                                                                                                                                                                                                                                                                                                                                                                                                                                                                                                                                                                                                                                                                                                                                                                                                                                                                                                                                                                                                                                                                                                                                                                                                                                                                                                                                                                                                                                                                                                                                                                                                                                                                                                                                                                                                                                                                                                                                                                                                                                                                                                                                                                                                                                                                                                                                                                                                                                                                                                                                                                                                                                                                                                                                                                                                                                                                                                                                                                                                                                                                                                                                                                                                                                                                                                                                                                                                                                                                                                                                                                | Laboratorio de Infectología y Virología Molecular                                                                                                              | Alejandro Bhrum; Ana Maria Contreras; Andres E. Munoz-Marcos; Carlos Palma; Catalina Pardo-Roa; Constanza Maldonado; Constanza Martinez-Valdevenito; Eileen Serrano; Erick Salinas; Estefany Poblete; Eugenia L. Fuentes Luppichini; Francisco Melo; Jennifer Angulo; Jorge Levican; Leonardo I. Almonacid; M. Belen Leyton; Magdalena Vera; Marcela Ferres; Maria Jose Avendano; Rafael A. Medina; Tamara Garcia-Salum |                                                                                                                                                                                                                                                                                                                                                                                                                                                                                                                              |
| EPI_ISL_2907502,<br>EPI_ISL_3134249,<br>EPI_ISL_3134254                                                                                                                                                                                                                                                                                                                                                                                                                                                                                                                                                                                                                                                                                                                                                                                                                                                                                                                                                                                                                                                                                                                                                                                                                                                                                                                                                                                                                                                                                                                                                                                                                                                                                                                                                                                                                                                                                                                                                                                                                                                                                                                                                                                                                                                                                                                                                                                                                                                                                                                                                                                                                                                                                                                                                                                                                                                                                                                                                                                                                                                                                                                                                                                                                                                                                                                                                                                                                                                                                                                                                                                                                                                                                                                                                                                                                                                                                                                                                                                                                                                                                                                                                                                                                                                                                                                                                                                                                                                                                                                                                                                                                                                                                                                                                                                                                                                                                                                                                                                                                                                                                                                                                                                                                                                                                                                                                                                                                                                                                                                                                                                                                                                                                                                                                                                                                                                                                                                                                                                                                                                                                                                                                                                                                                                                                                                                                                                                                                                                                                                                                                                                                                                                                                                                                                                                                                                                                                                                                                                                                                                                                                                                                                                                                                                                                                                                                                                                                                                                                                                                                                                                                                                                                                                                                                                                                                                                                                                                                                                                                                                                                                                                                                                                                                                                                                                                                                                                                                                                                                                                                                                                                                                                                                                                                                                                                                                                                                                                                                                                                                                                                                                                                                                                                                                                                                                                                                                                                                                                                                                                                                                                                                                                                                                                                                                                                                                                                                                                                                                                                                                                                                                                                                                                                                                                                                                                                                                                                                                                                                                                                                                                                                                                                                                                                                                                                                                                                                                                                                                                                                                                                                                                                                                                                                                                                                                                                                                                                                                                                                                                                                                                                                                                                                                                                                                                                                                                                                                                                                                                                                                                                                                                                                                                                                                                                                                                                                                                                                                                                                                                                                                                                                                                                                                                                                                                                                                                                                                                                                                                                                                                                                                                                                                                                                                                                               | Laboratorio de Medicina Molecular, Universidad de Magallanes                                                                                                   | Centro Asistencial Docente y de Investigación, Universidad de Magallanes                                                                                                                                                                                                                                                                                                                                                | Carolina Pérez; Constanza Ceroni; Diego Alvarez; Inés Cid; Jacqueline Aldridge; Jorge González; Juan Ríos; Marcelo Navarrete; Roberto Uribe-Paredes                                                                                                                                                                                                                                                                                                                                                                          |
| EPI_ISL_1534645                                                                                                                                                                                                                                                                                                                                                                                                                                                                                                                                                                                                                                                                                                                                                                                                                                                                                                                                                                                                                                                                                                                                                                                                                                                                                                                                                                                                                                                                                                                                                                                                                                                                                                                                                                                                                                                                                                                                                                                                                                                                                                                                                                                                                                                                                                                                                                                                                                                                                                                                                                                                                                                                                                                                                                                                                                                                                                                                                                                                                                                                                                                                                                                                                                                                                                                                                                                                                                                                                                                                                                                                                                                                                                                                                                                                                                                                                                                                                                                                                                                                                                                                                                                                                                                                                                                                                                                                                                                                                                                                                                                                                                                                                                                                                                                                                                                                                                                                                                                                                                                                                                                                                                                                                                                                                                                                                                                                                                                                                                                                                                                                                                                                                                                                                                                                                                                                                                                                                                                                                                                                                                                                                                                                                                                                                                                                                                                                                                                                                                                                                                                                                                                                                                                                                                                                                                                                                                                                                                                                                                                                                                                                                                                                                                                                                                                                                                                                                                                                                                                                                                                                                                                                                                                                                                                                                                                                                                                                                                                                                                                                                                                                                                                                                                                                                                                                                                                                                                                                                                                                                                                                                                                                                                                                                                                                                                                                                                                                                                                                                                                                                                                                                                                                                                                                                                                                                                                                                                                                                                                                                                                                                                                                                                                                                                                                                                                                                                                                                                                                                                                                                                                                                                                                                                                                                                                                                                                                                                                                                                                                                                                                                                                                                                                                                                                                                                                                                                                                                                                                                                                                                                                                                                                                                                                                                                                                                                                                                                                                                                                                                                                                                                                                                                                                                                                                                                                                                                                                                                                                                                                                                                                                                                                                                                                                                                                                                                                                                                                                                                                                                                                                                                                                                                                                                                                                                                                                                                                                                                                                                                                                                                                                                                                                                                                                                                                                       | Laboratorio de Referencia Nacional de Virus Respiratorio. Instituto Nacional de Salud Perú                                                                     | Laboratorio de Referencia Nacional de Biotecnología y Biología Molecular. Instituto Nacional de Salud Perú                                                                                                                                                                                                                                                                                                              | Carlos Padilla Rojas; Henri Bailon Calderon; Johanna Balbuena Torres; Karolyn Vega Chozo; Luis Barcena; Marco Galarza Perez; Maribel Huaringa Nuñez; Nancy Rojas Serrano; Omar Caceres Rey; Priscila Lope Pari                                                                                                                                                                                                                                                                                                               |
| EPI_ISL_1111127, EPI_ISL_1111128, EPI_ISL_1111130, EPI_ISL_1111131, EPI_ISL_1111132, EPI_ISL_1111133, EPI_ISL_1111134, EPI_ISL_1111135, EPI_ISL_1111136, EPI_ISL_1111137, EPI_ISL_1111138, EPI_ISL_1111139, EPI_ISL_1111140, EPI_ISL_1111141, EPI_ISL_1111142, EPI_ISL_1111143, EPI_ISL_1111144, EPI_ISL_1111145, EPI_ISL_1111146, EPI_ISL_1111147, EPI_ISL_1111148, EPI_ISL_1111149, EPI_ISL_1111150, EPI_ISL_1111151, EPI_ISL_1111152, EPI_ISL_1111153, EPI_ISL_1111154, EPI_ISL_1111155, EPI_ISL_1111156, EPI_ISL_1111157, EPI_ISL_1111158, EPI_ISL_1111159, EPI_ISL_1111160, EPI_ISL_1111161, EPI_ISL_1111162, EPI_ISL_1111163, EPI_ISL_1111164, EPI_ISL_1111165, EPI_ISL_1111166, EPI_ISL_1111167, EPI_ISL_1111168, EPI_ISL_1111169, EPI_ISL_1111170, EPI_ISL_1111171, EPI_ISL_1111172, EPI_ISL_1111173, EPI_ISL_1111174, EPI_ISL_1111175, EPI_ISL_1111176, EPI_ISL_1111177, EPI_ISL_1111178, EPI_ISL_1111179, EPI_ISL_1111180, EPI_ISL_1111181, EPI_ISL_1111182, EPI_ISL_1111183, EPI_ISL_1111184, EPI_ISL_1111185, EPI_ISL_1111186, EPI_ISL_1111187, EPI_ISL_1111188, EPI_ISL_1111189, EPI_ISL_1111190, EPI_ISL_1111191, EPI_ISL_1111192, EPI_ISL_1111193, EPI_ISL_1111194, EPI_ISL_1111195, EPI_ISL_1111196, EPI_ISL_1111197, EPI_ISL_1111198, EPI_ISL_1111199, EPI_ISL_1111200, EPI_ISL_1111201, EPI_ISL_1111202, EPI_ISL_1111203, EPI_ISL_1111204, EPI_ISL_1111205, EPI_ISL_1111206, EPI_ISL_1111207, EPI_ISL_1111208, EPI_ISL_1111209, EPI_ISL_1111210, EPI_ISL_1111211, EPI_ISL_1111212, EPI_ISL_1111213, EPI_ISL_1111214, EPI_ISL_1111215, EPI_ISL_1111216, EPI_ISL_1111217, EPI_ISL_1111218, EPI_ISL_1111219, EPI_ISL_1111220, EPI_ISL_1111221, EPI_ISL_1111222, EPI_ISL_1111223, EPI_ISL_1111224, EPI_ISL_1111225, EPI_ISL_1111226, EPI_ISL_1111227, EPI_ISL_1111228, EPI_ISL_1111229, EPI_ISL_1111230, EPI_ISL_1111231, EPI_ISL_1111232, EPI_ISL_1111233, EPI_ISL_1111234, EPI_ISL_1111235, EPI_ISL_1111236, EPI_ISL_1111237, EPI_ISL_1111238, EPI_ISL_1111239, EPI_ISL_1111240, EPI_ISL_1111241, EPI_ISL_1111242, EPI_ISL_1111243, EPI_ISL_1111244, EPI_ISL_1111245, EPI_ISL_1111246, EPI_ISL_1111247, EPI_ISL_1111248, EPI_ISL_1111249, EPI_ISL_1111250, EPI_ISL_1111251, EPI_ISL_1111252, EPI_ISL_1111253, EPI_ISL_1111254, EPI_ISL_1111255, EPI_ISL_1111256, EPI_ISL_1111257, EPI_ISL_1111258, EPI_ISL_1111259, EPI_ISL_1111260, EPI_ISL_1111261, EPI_ISL_1111262, EPI_ISL_1111263, EPI_ISL_1111264, EPI_ISL_1111265, EPI_ISL_1111266, EPI_ISL_1111267, EPI_ISL_1111268, EPI_ISL_1111269, EPI_ISL_1111270, EPI_ISL_1111271, EPI_ISL_1111272, EPI_ISL_1111273, EPI_ISL_1111274, EPI_ISL_1111275, EPI_ISL_1111276, EPI_ISL_1111277, EPI_ISL_1111278, EPI_ISL_1111279, EPI_ISL_1111280, EPI_ISL_1111281, EPI_ISL_1111282, EPI_ISL_1111283, EPI_ISL_1111284, EPI_ISL_1111285, EPI_ISL_1111286, EPI_ISL_1111287, EPI_ISL_1111288, EPI_ISL_1111289, EPI_ISL_1111290, EPI_ISL_1111291, EPI_ISL_1111292, EPI_ISL_1111293, EPI_ISL_1111294, EPI_ISL_1111295, EPI_ISL_1111296, EPI_ISL_1111297, EPI_ISL_1111298, EPI_ISL_1111299, EPI_ISL_1111300, EPI_ISL_1111301, EPI_ISL_1111302, EPI_ISL_1111303, EPI_ISL_1111304, EPI_ISL_1111305, EPI_ISL_1111306, EPI_ISL_1111307, EPI_ISL_1111308, EPI_ISL_1111309, EPI_ISL_1111310, EPI_ISL_1111311, EPI_ISL_1111312, EPI_ISL_1111313, EPI_ISL_1111314, EPI_ISL_1111315, EPI_ISL_1111316, EPI_ISL_1111317, EPI_ISL_1111318, EPI_ISL_1111319, EPI_ISL_1111320, EPI_ISL_1111321, EPI_ISL_1111322, EPI_ISL_1111323, EPI_ISL_1111324, EPI_ISL_1111325, EPI_ISL_1111326, EPI_ISL_1111327, EPI_ISL_1111328, EPI_ISL_1111329, EPI_ISL_1111330, EPI_ISL_1111331, EPI_ISL_1111332, EPI_ISL_1111333, EPI_ISL_1111334, EPI_ISL_1111335, EPI_ISL_1111336, EPI_ISL_1111337, EPI_ISL_1111338, EPI_ISL_1111339, EPI_ISL_1111340, EPI_ISL_1111341, EPI_ISL_1111342, EPI_ISL_1111343, EPI_ISL_1111344, EPI_ISL_1111345, EPI_ISL_1111346, EPI_ISL_1111347, EPI_ISL_1111348, EPI_ISL_1111349, EPI_ISL_1111350, EPI_ISL_1111351, EPI_ISL_1111352, EPI_ISL_1111353, EPI_ISL_1111354, EPI_ISL_1111355, EPI_ISL_1111356, EPI_ISL_1111357, EPI_ISL_1111358, EPI_ISL_1111359, EPI_ISL_1111360, EPI_ISL_1111361, EPI_ISL_1111362, EPI_ISL_1111363, EPI_ISL_1111364, EPI_ISL_1111365, EPI_ISL_1111366, EPI_ISL_1111367, EPI_ISL_1111368, EPI_ISL_1111369, EPI_ISL_1111370, EPI_ISL_1111371, EPI_ISL_1111372, EPI_ISL_1111373, EPI_ISL_1111374, EPI_ISL_1111375, EPI_ISL_1111376, EPI_ISL_1111377, EPI_ISL_1111378, EPI_ISL_1111379, EPI_ISL_1111380, EPI_ISL_1111381, EPI_ISL_1111382, EPI_ISL_1111383, EPI_ISL_1111384, EPI_ISL_1111385, EPI_ISL_1111386, EPI_ISL_1111387, EPI_ISL_1111388, EPI_ISL_1111389, EPI_ISL_1111390, EPI_ISL_1111391, EPI_ISL_1111392, EPI_ISL_1111393, EPI_ISL_1111394, EPI_ISL_1111395, EPI_ISL_1111396, EPI_ISL_1111397, EPI_ISL_1111398, EPI_ISL_1111399, EPI_ISL_1111400, EPI_ISL_1111401, EPI_ISL_1111402, EPI_ISL_1111403, EPI_ISL_1111404, EPI_ISL_1111405, EPI_ISL_1111406, EPI_ISL_1111407, EPI_ISL_1111408, EPI_ISL_1111409, EPI_ISL_1111410, EPI_ISL_1111411, EPI_ISL_1111412, EPI_ISL_1111413, EPI_ISL_1111414, EPI_ISL_1111415, EPI_ISL_1111416, EPI_ISL_1111417, EPI_ISL_1111418, EPI_ISL_1111419, EPI_ISL_1111420, EPI_ISL_1111421, EPI_ISL_1111422, EPI_ISL_1111423, EPI_ISL_1111424, EPI_ISL_1111425, EPI_ISL_1111426, EPI_ISL_1111427, EPI_ISL_1111428, EPI_ISL_1111429, EPI_ISL_1111430, EPI_ISL_1111431, EPI_ISL_1111432, EPI_ISL_1111433, EPI_ISL_1111434, EPI_ISL_1111435, EPI_ISL_1111436, EPI_ISL_1111437, EPI_ISL_1111438, EPI_ISL_1111439, EPI_ISL_1111440, EPI_ISL_1111441, EPI_ISL_1111442, EPI_ISL_1111443, EPI_ISL_1111444, EPI_ISL_1111445, EPI_ISL_1111446, EPI_ISL_1111447, EPI_ISL_1111448, EPI_ISL_1111449, EPI_ISL_1111450, EPI_ISL_1111451, EPI_ISL_1111452, EPI_ISL_1111453, EPI_ISL_1111454, EPI_ISL_1111455, EPI_ISL_1111456, EPI_ISL_1111457, EPI_ISL_1111458, EPI_ISL_1111459, EPI_ISL_1111460, EPI_ISL_1111461, EPI_ISL_1111462, EPI_ISL_1111463, EPI_ISL_1111464, EPI_ISL_1111465, EPI_ISL_1111466, EPI_ISL_1111467, EPI_ISL_1111468, EPI_ISL_1111469, EPI_ISL_1111470, EPI_ISL_1111471, EPI_ISL_1111472, EPI_ISL_1111473, EPI_ISL_1111474, EPI_ISL_1111475, EPI_ISL_1111476, EPI_ISL_1111477, EPI_ISL_1111478, EPI_ISL_1111479, EPI_ISL_1111480, EPI_ISL_1111481, EPI_ISL_1111482, EPI_ISL_1111483, EPI_ISL_1111484, EPI_ISL_1111485, EPI_ISL_1111486, EPI_ISL_1111487, EPI_ISL_1111488, EPI_ISL_1111489, EPI_ISL_1111490, EPI_ISL_1111491, EPI_ISL_1111492, EPI_ISL_1111493, EPI_ISL_1111494, EPI_ISL_1111495, EPI_ISL_1111496, EPI_ISL_1111497, EPI_ISL_1111498, EPI_ISL_1111499, EPI_ISL_1111500, EPI_ISL_1111501, EPI_ISL_1111502, EPI_ISL_1111503, EPI_ISL_1111504, EPI_ISL_1111505, EPI_ISL_1111506, EPI_ISL_1111507, EPI_ISL_1111508, EPI_ISL_1111509, EPI_ISL_1111510, EPI_ISL_1111511, EPI_ISL_1111512, EPI_ISL_1111513, EPI_ISL_1111514, EPI_ISL_1111515, EPI_ISL_1111516, EPI_ISL_1111517, EPI_ISL_1111518, EPI_ISL_1111519, EPI_ISL_1111520, EPI_ISL_1111521, EPI_ISL_1111522, EPI_ISL_1111523, EPI_ISL_1111524, EPI_ISL_1111525, EPI_ISL_1111526, EPI_ISL_1111527, EPI_ISL_1111528, EPI_ISL_1111529, EPI_ISL_1111530, EPI_ISL_1111531, EPI_ISL_1111532, EPI_ISL_1111533, EPI_ISL_1111534, EPI_ISL_1111535, EPI_ISL_1111536, EPI_ISL_1111537, EPI_ISL_1111538, EPI_ISL_1111539, EPI_ISL_1111540, EPI_ISL_1111541, EPI_ISL_1111542, EPI_ISL_1111543, EPI_ISL_1111544, EPI_ISL_1111545, EPI_ISL_1111546, EPI_ISL_1111547, EPI_ISL_1111548, EPI_ISL_1111549, EPI_ISL_1111550, EPI_ISL_1111551, EPI_ISL_1111552, EPI_ISL_1111553, EPI_ISL_1111554, EPI_ISL_1111555, EPI_ISL_1111556, EPI_ISL_1111557, EPI_ISL_1111558, EPI_ISL_1111559, EPI_ISL_1111560, EPI_ISL_1111561, EPI_ISL_1111562, EPI_ISL_1111563, EPI_ISL_1111564, EPI_ISL_1111565, EPI_ISL_1111566, EPI_ISL_1111567, EPI_ISL_1111568, EPI_ISL_1111569, EPI_ISL_1111570, EPI_ISL_1111571, EPI_ISL_1111572, EPI_ISL_1111573, EPI_ISL_1111574, EPI_ISL_1111575, EPI_ISL_1111576, EPI_ISL_1111577, EPI_ISL_1111578, EPI_ISL_1111579, EPI_ISL_1111580, EPI_ISL_1111581, EPI_ISL_1111582, EPI_ISL_1111583, EPI_ISL_1111584, EPI_ISL_1111585, EPI_ISL_1111586, EPI_ISL_1111587, EPI_ISL_1111588, EPI_ISL_1111589, EPI_ISL_1111590, EPI_ISL_1111591, EPI_ISL_1111592, EPI_ISL_1111593, EPI_ISL_1111594, EPI_ISL_1111595, EPI_ISL_1111596, EPI_ISL_1111597, EPI_ISL_1111598, EPI_ISL_1111599, EPI_ISL_1111600, EPI_ISL_1111601, EPI_ISL_1111602, EPI_ISL_1111603, EPI_ISL_1111604, EPI_ISL_1111605, EPI_ISL_1111606, EPI_ISL_1111607, EPI_ISL_1111608, EPI_ISL_1111609, EPI_ISL_1111610, EPI_ISL_1111611, EPI_ISL_1111612, EPI_ISL_1111613, EPI_ISL_1111614, EPI_ISL_1111615, EPI_ISL_1111616, EPI_ISL_1111617, EPI_ISL_1111618, EPI_ISL_1111619, EPI_ISL_1111620, EPI_ISL_1111621, EPI_ISL_1111622, EPI_ISL_1111623, EPI_ISL_1111624, EPI_ISL_1111625, EPI_ISL_1111626, EPI_ISL_1111627, EPI_ISL_1111628, EPI_ISL_1111629, EPI_ISL_1111630, EPI_ISL_1111631, EPI_ISL_1111632, EPI_ISL_1111633, EPI_ISL_1111634, EPI_ISL_1111635, EPI_ISL_1111636, EPI_ISL_1111637, EPI_ISL_1111638, EPI_ISL_1111639, EPI_ISL_1111640, EPI_ISL_1111641, EPI_ISL_1111642, EPI_ISL_1111643, EPI_ISL_1111644, EPI_ISL_1111645, EPI_ISL_1111646, EPI_ISL_1111647, EPI_ISL_1111648, EPI_ISL_1111649, EPI_ISL_1111650, EPI_ISL_1111651, EPI_ISL_1111652, EPI_ISL_1111653, EPI_ISL_1111654, EPI_ISL_1111655, EPI_ISL_1111656, EPI_ISL_1111657, EPI_ISL_1111658, EPI_ISL_1111659, EPI_ISL_1111660, EPI_ISL_1111661, EPI_ISL_1111662, EPI_ISL_1111663, EPI_ISL_1111664, EPI_ISL_1111665, EPI_ISL_1111666, EPI_ISL_1111667, EPI_ISL_1111668, EPI_ISL_1111669, EPI_ISL_1111670, EPI_ISL_1111671, EPI_ISL_1111672, EPI_ISL_1111673, EPI_ISL_1111674, EPI_ISL_1111675, EPI_ISL_1111676, EPI_ISL_1111677, EPI_ISL_1111678, EPI_ISL_1111679, EPI_ISL_1111680, EPI_ISL_1111681, EPI_ISL_1111682, EPI_ISL_1111683, EPI_ISL_1111684, EPI_ISL_1111685, EPI_ISL_1111686, EPI_ISL_1111687, EPI_ISL_1111688, EPI_ISL_1111689, EPI_ISL_1111690, EPI_ISL_1111691, EPI_ISL_1111692, EPI_ISL_1111693, EPI_ISL_1111694, EPI_ISL_1111695, EPI_ISL_1111696, EPI_ISL_1111697, EPI_ISL_1111698, EPI_ISL_1111699, EPI_ISL_1111700, EPI_ISL_1111701, EPI_ISL_1111702, EPI_ISL_1111703, EPI_ISL_1111704, EPI_ISL_1111705, EPI_ISL_1111706, EPI_ISL_1111707, EPI_ISL_1111708, EPI_ISL_1111709, EPI_ISL_1111710, EPI_ISL_1111711, EPI_ISL_1111712, EPI_ISL_1111713, EPI_ISL_1111714, EPI_ISL_1111715, EPI_ISL_1111716, EPI_ISL_1111717, EPI_ISL_1111718, EPI_ISL_1111719, EPI_ISL_1111720, EPI_ISL_1111721, EPI_ISL_1111722, EPI_ISL_1111723, EPI_ISL_1111724, EPI_ISL_1111725, EPI_ISL_1111726, EPI_ISL_1111727, EPI_ISL_1111728, EPI_ISL_1111729, EPI_ISL_1111730, EPI_ISL_1111731, EPI_ISL_1111732, EPI_ISL_1111733, EPI_ISL_1111734, EPI_ISL_1111735, EPI_ISL_1111736, EPI_ISL_1111737, EPI_ISL_1111738, EPI_ISL_1111739, EPI_ISL_1111740, EPI_ISL_1111741, EPI_ISL_1111742, EPI_ISL_1111743, EPI_ISL_1111744, EPI_ISL_1111745, EPI_ISL_1111746, EPI_ISL_1111747, EPI_ISL_1111748, EPI_ISL_1111749, EPI_ISL_1111750, EPI_ISL_1111751, EPI_ISL_1111752, EPI_ISL_1111753, EPI_ISL_1111754, EPI_ISL_1111755, EPI_ISL_1111756, EPI_ISL_1111757, EPI_ISL_1111758, EPI_ISL_1111759, EPI_ISL_1111760, EPI_ISL_1111761, EPI_ISL_1111762, EPI_ISL_1111763, EPI_ISL_1111764, EPI_ISL_1111765, EPI_ISL_1111766, EPI_ISL_1111767, EPI_ISL_1111768, EPI_ISL_1111769, EPI_ISL_1111770, EPI_ISL_1111771, EPI_ISL_1111772, EPI_ISL_1111773, EPI_ISL_1111774, EPI_ISL_1111775, EPI_ISL_1111776, EPI_ISL_1111777, EPI_ISL_1111778, EPI_ISL_1111779, EPI_ISL_1111780, EPI_ISL_1111781, EPI_ISL_1111782, EPI_ISL_1111783, EPI_ISL_1111784, EPI_ISL_1111785, EPI_ISL_1111786, EPI_ISL_1111787, EPI_ISL_1111788, EPI_ISL_1111789, EPI_ISL_1111790, EPI_ISL_1111791, EPI_ISL_1111792, EPI_ISL_1111793, EPI_ISL_1111794, EPI_ISL_1111795, EPI_ISL_1111796, EPI_ISL_1111797, EPI_ISL_1111798, EPI_ISL_1111799, EPI_ISL_1111800, EPI_ISL_1111801, EPI_ISL_1111802, EPI_ISL_1111803, EPI_ISL_1111804, EPI_ISL_1111805, EPI_ISL_1111806, EPI_ISL_1111807, EPI_ISL_1111808, EPI_ISL_1111809, EPI_ISL_1111810, EPI_ISL_1111811, EPI_ISL_1111812, EPI_ISL_1111813, EPI_ISL_1111814, EPI_ISL_1111815, EPI_ISL_1111816, EPI_ISL_1111817, EPI_ISL_1111818, EPI_ISL_1111819, EPI_ISL_1111820, EPI_ISL_1111821, EPI_ISL_1111822, EPI_ISL_1111823, EPI_ISL_1111824, EPI_ISL_1111825, EPI_ISL_1111826, EPI_ISL_1111827, EPI_ISL_1111828, EPI_ISL_1111829, EPI_ISL_1111830, EPI_ISL_1111831, EPI_ISL_1111832, EPI_ISL_1111833, EPI_ISL_1111834, EPI_ISL_1111835, EPI_ISL_1111836, EPI_ISL_1111837, EPI_ISL_1111838, EPI_ISL_1111839, EPI_ISL_1111840, EPI_ISL_1111841, EPI_ISL_1111842, EPI_ISL_1111843, EPI_ISL_1111844, EPI_ISL_1111845, EPI_ISL_1111846, EPI_ISL_1111847, EPI_ISL_1111848, EPI_ISL_1111849, EPI_ISL_1111850, EPI_ISL_1111851, EPI_ISL_1111852, EPI_ISL_1111853, EPI_ISL_1111854, EPI_ISL_1111855, EPI_ISL_1111856, EPI_ISL_1111857, EPI_ISL_1111858, EPI_ISL_1111859, EPI_ISL_1111860, EPI_ISL_1111861, EPI_ISL_1111862, EPI_ISL_1111863, EPI_ISL_1111864, EPI_ISL_1111865, EPI_ISL_1111866, EPI_ISL_1111867, EPI_ISL_1111868, EPI_ISL_1111869, EPI_ISL_1111870, EPI_ISL_1111871, EPI_ISL_1111872, EPI_ISL_1111873, EPI_ISL_1111874, EPI_ISL_1111875, EPI_ISL_1111876, EPI_ISL_1111877, EPI_ISL_1111878, EPI_ISL_1111879, EPI_ISL_1111880, EPI_ISL_1111881, EPI |                                                                                                                                                                |                                                                                                                                                                                                                                                                                                                                                                                                                         |                                                                                                                                                                                                                                                                                                                                                                                                                                                                                                                              |



|                                                                                                                       | Respiratorias-Departamento Virología-INEI                                  | Infeciosas C.G.Malbran                                                                                                                                             |                                                                                                                                                                                                                                                                                                                                                                                                                                                                                                                                                                                                                                                                                                                                                                                                                                                                                                                                                                                                                                                                                                                                                                                                                                                                                                                                                                                                                                                                                                                                                                                                                                                                                                      |
|-----------------------------------------------------------------------------------------------------------------------|----------------------------------------------------------------------------|--------------------------------------------------------------------------------------------------------------------------------------------------------------------|------------------------------------------------------------------------------------------------------------------------------------------------------------------------------------------------------------------------------------------------------------------------------------------------------------------------------------------------------------------------------------------------------------------------------------------------------------------------------------------------------------------------------------------------------------------------------------------------------------------------------------------------------------------------------------------------------------------------------------------------------------------------------------------------------------------------------------------------------------------------------------------------------------------------------------------------------------------------------------------------------------------------------------------------------------------------------------------------------------------------------------------------------------------------------------------------------------------------------------------------------------------------------------------------------------------------------------------------------------------------------------------------------------------------------------------------------------------------------------------------------------------------------------------------------------------------------------------------------------------------------------------------------------------------------------------------------|
| EPI_ISL_6010013, EPI_ISL_6010015, EPI_ISL_6010016                                                                     | Servicio de Inmunología del Hospital Julio Perrando                        | Laboratorio de Biología Molecular, Instituto de Medicina Regional on behalf of 'Proyecto Argentino Interinstitucional de genómica de SARS-CoV-2' (PAIS Consortium) | Bettina Brusés; Florencia Vallejos Schulze; Griselda Oria; Horacio Lucero.; Javier Mussin; Laura Formichelli; María Delia Foussal; Melina Lorenzini Campos; Raúl Maximiliano Acevedo                                                                                                                                                                                                                                                                                                                                                                                                                                                                                                                                                                                                                                                                                                                                                                                                                                                                                                                                                                                                                                                                                                                                                                                                                                                                                                                                                                                                                                                                                                                 |
| EPI_ISL_2283637                                                                                                       | Servicio de Microbiología Hospital Ramon y Cajal                           | Servicio de Microbiología Hospital Ramon y Cajal                                                                                                                   | Galan JC; Martínez L. Abreu M; Ponce M; y Gonzalez-Alba JM                                                                                                                                                                                                                                                                                                                                                                                                                                                                                                                                                                                                                                                                                                                                                                                                                                                                                                                                                                                                                                                                                                                                                                                                                                                                                                                                                                                                                                                                                                                                                                                                                                           |
| EPI_ISL_2035916, EPI_ISL_2135542, EPI_ISL_2600885                                                                     | Servicio de Microbiología. Hospital General Universitario de Castellón     | SeqCOVID-SPAIN consortium/IBV(CSIC)                                                                                                                                | María Dolores Tirado Balaguer and SeqCOVID-SPAIN consortium; Rosario Moreno Muñoz                                                                                                                                                                                                                                                                                                                                                                                                                                                                                                                                                                                                                                                                                                                                                                                                                                                                                                                                                                                                                                                                                                                                                                                                                                                                                                                                                                                                                                                                                                                                                                                                                    |
| EPI_ISL_2790432, EPI_ISL_3086234, EPI_ISL_3086236, EPI_ISL_3086242, EPI_ISL_3086244                                   | Servizo de Microbioloxía. Complejo Hospitalario de Santiago de Compostela  | Servizo de Microbioloxía. Complejo Hospitalario de Santiago de Compostela                                                                                          | Amparo Coira; Antonio Aguilera; Carlos García_Riestra; Daniel Navarro; Gema Barbeito; Iria Roca; José Llovo; Laura Millán; Manuela Hernández; María Luisa Pérez_del_Molino; Mercedes Treviño; Rocío trastoy; Teresa Lopez_Valiño; Xosé Costa                                                                                                                                                                                                                                                                                                                                                                                                                                                                                                                                                                                                                                                                                                                                                                                                                                                                                                                                                                                                                                                                                                                                                                                                                                                                                                                                                                                                                                                         |
| EPI_ISL_2477504                                                                                                       | Stanford Health Care                                                       | Stanford University School of Medicine, Clinical Virology Laboratory                                                                                               | Becky Jiang; Bernadette Troung; ChunHong Huang; Daniel Solis; James Zehnder; Malaya K. Sahoo; Mamdouh Sibai; Michelle Verghese; and Benjamin A. Pinsky                                                                                                                                                                                                                                                                                                                                                                                                                                                                                                                                                                                                                                                                                                                                                                                                                                                                                                                                                                                                                                                                                                                                                                                                                                                                                                                                                                                                                                                                                                                                               |
| EPI_ISL_2491126                                                                                                       | TGen North                                                                 | TGen North                                                                                                                                                         | "Jolene Bowers; Ashlyn Pfeiffer; Chris French; Darrin Lemmer; Dave Engelthaler; Hayley Yaglom; Heather Centner; The Arizona COVID Genomics Union (ACGU)"                                                                                                                                                                                                                                                                                                                                                                                                                                                                                                                                                                                                                                                                                                                                                                                                                                                                                                                                                                                                                                                                                                                                                                                                                                                                                                                                                                                                                                                                                                                                             |
| EPI_ISL_3067029, EPI_ISL_3321291, EPI_ISL_3321302, EPI_ISL_3321305, EPI_ISL_3321307, EPI_ISL_3370446, EPI_ISL_3535718 | see above                                                                  | UC-Christus Clinical Hospital Laboratory                                                                                                                           | Laboratory of Molecular Virology, School of Medicine, Pontificia Universidad Católica de Chile                                                                                                                                                                                                                                                                                                                                                                                                                                                                                                                                                                                                                                                                                                                                                                                                                                                                                                                                                                                                                                                                                                                                                                                                                                                                                                                                                                                                                                                                                                                                                                                                       |
| EPI_ISL_2796112                                                                                                       | UNILABS                                                                    | Instituto Nacional de Saude (INSA) and Instituto Gulbenkian de Ciencia (IGC)                                                                                       | Borges et al                                                                                                                                                                                                                                                                                                                                                                                                                                                                                                                                                                                                                                                                                                                                                                                                                                                                                                                                                                                                                                                                                                                                                                                                                                                                                                                                                                                                                                                                                                                                                                                                                                                                                         |
| EPI_ISL_2928137                                                                                                       | UPA - LUIS ATÍLIO LOSI VIANA                                               | Hemocentro de Ribeirao Preto                                                                                                                                       | Brazil; Rede de Alerta das Variantes da COVID-19 coordinated by Butantan Institute; São Paulo                                                                                                                                                                                                                                                                                                                                                                                                                                                                                                                                                                                                                                                                                                                                                                                                                                                                                                                                                                                                                                                                                                                                                                                                                                                                                                                                                                                                                                                                                                                                                                                                        |
| EPI_ISL_6258874                                                                                                       | URMC LABS                                                                  | URMC LABS                                                                                                                                                          | Andrew Cameron; Dwight Hardy; Ghinva Dumyati; Kelly DeLary; Stepan Voljehn                                                                                                                                                                                                                                                                                                                                                                                                                                                                                                                                                                                                                                                                                                                                                                                                                                                                                                                                                                                                                                                                                                                                                                                                                                                                                                                                                                                                                                                                                                                                                                                                                           |
| EPI_ISL_1678096                                                                                                       | UT-Unified State Labs: Public Health Utah DOH                              | Centers for Disease Control and Prevention Division of Viral Diseases, Pathogen Discovery                                                                          | Alison Laufer Halpin; Ben L. Rambo-Martin; Clinton R. Paden; Dakota Howard; Darlene Wagner; Dave Wentworth; Dhwanii Batra; Jasmine Padilla; Justin Lee; Katie Dillon; Krista Queen; Kristen Knipe; Kristine Lacey; Mark Burroughs; Matthew Schmerer; Mili Sheth; Peter Cook; Sam Shepard; Sarah Nobles; Shoshona Le; Suxiang Tong; Vivien Dugan; Yvette Unoarumhi                                                                                                                                                                                                                                                                                                                                                                                                                                                                                                                                                                                                                                                                                                                                                                                                                                                                                                                                                                                                                                                                                                                                                                                                                                                                                                                                    |
| EPI_ISL_2031535, EPI_ISL_2161933, EPI_ISL_2233231, EPI_ISL_2233304, EPI_ISL_2233322, EPI_ISL_2233327, EPI_ISL_2503084 | see above                                                                  | UW Virology Lab                                                                                                                                                    | Alexander Greninger; Hong Xie; Keith R Jerome; Lasata Shrestha; Meei-Li Huang; Michelle Lin; Nathan Breit; Noah R. Baker; Patrick Mathias; Pavitra Roychoudhury; Ricardo Perez; Robert J. Livingston; Sean Ellis; Shah Mohamed Bakhsh; Tien V. Nguyen                                                                                                                                                                                                                                                                                                                                                                                                                                                                                                                                                                                                                                                                                                                                                                                                                                                                                                                                                                                                                                                                                                                                                                                                                                                                                                                                                                                                                                                |
| EPI_ISL_2942327, EPI_ISL_2942352, EPI_ISL_2942374, EPI_ISL_2942639, EPI_ISL_2942708, EPI_ISL_3805725                  | Unidad de Investigación Médica de Yucatán (UIMY)                           | Unidad de Genómica Avanzada                                                                                                                                        | ; Alejandra García-Gasca; Alejandra Hernandez-Teran; Alejandro Sanchez-Flores; Alfredo Herrera-Estrella; Alicia Ocaña-Mondragon; Andreu Comas-García; Angel Gustavo Salas-Lais; Antonio Loza Roman; Bernardo Martínez-Miguel; Blanca Taboada; Brenda Irasema Maldonado-Meza; Bruno Gomez-Gil; Carla Ivon Herrera-Najera; Carlos F. Arias; Celia Boukadida; Celida Duque Molina; Celida Martínez- Rodríguez; Clara Esperanza Santacruz-Tinoco; Concepcion Grajales-Muñiz; Consorcio Mexicano de Vigilancia Genómica (CoVIGen-Mex). Authors (in alphabetical order): Julio Elias Alvarado-Yaah; Cristobal Cháidez-Quirroz; Daniel Fregoso-Rueda; Daniel Lira Morales; Eduardo Becerril-Vargas; Fernando Fontove-Herrera; Fidencio Mejía-Nepomuceno; Francisco Pulido; Gloria Elena Espinosa-Ayala; Gloria María Molina-Salinas; Gloria Vazquez; Hector Esteban Paz-Juarez; Hector Montoya-Fuentes; Helen Haydee Fernanda Ramirez-Plascencia; Irvin González-López; Jean Pierre González; Jesus Hernandez; Joel Armando Vázquez-Perez.; Jorge Salas-Hernandez; Jose Antonio Enciso-Moreno; Jose Arturo Martínez-Orozco; Jose Esteban Muñoz-Medina; Jose de Jesus Nuñez-Contreras; Juan Bautista Chale-Dzul; Julissa Enciso-Ibarra; Luis Alberto Ochoa-Carrera; Margarita Matias-Florentino; María Guadalupe Santiago-Mauricio; María Guadalupe de Jesus Mireles-Rivera; Mario Mujica-Sanchez; Marissa Perez-García; Nelly Selem-Mojica; Pavel Isa; Ricardo Ciria Merce; Ricardo Grande; Rosa María Gutierrez Rios; Santiago avila-Rios; Selene Zarate; Susana Lopez; Veronica Mata-Haro; Victor Eduardo Garcia-Arias; Victor Hugo Borja-Aburto                                                          |
| EPI_ISL_2801648, EPI_ISL_3347562                                                                                      | Unidad de Investigación Médica de Yucatán (UIMY)                           | Instituto de Biotecnología de la UNAM                                                                                                                              | ; Alejandra García-Gasca; Alejandra Hernández-Terán; Alejandro Sánchez-Flores; Alfredo Herrera-Estrella; Alicia Ocaña-Mondragón; Andreu Comas-García; Angel Gustavo Salas-Lais; Antonio Loza Román; Bernardo Martínez-Miguel; Blanca Taboada; Brenda Irasema Maldonado-Meza; Bruno Gómez-Gil; Carla Ivón Herrera-Najera; Carlos F. Arias; Celia Boukadida; Clara Esperanza Santacruz-Tinoco; Concepción Grajales-Muñiz; Consorcio Mexicano de Vigilancia Genómica (CoVIGen-Mex). Authors (in alphabetical order): Julio Elias Alvarado-Yaah; Cristóbal Cháidez-Quiróz; Celida Duque Molina; Celida Martínez- Rodríguez; Daniel Fregoso-Rueda; Daniel Lira Morales; Eduardo Becerril-Vargas; Fernando Fontove-Herrera; Fidencio Mejía-Nepomuceno; Francisco Pulido; Gloria Elena Espinosa-Ayala; Gloria María Molina-Salinas; Gloria Vazquez; Hector Esteban Paz-Juárez; Hector Montoya-Fuentes; Helen Haydee Fernanda Ramirez-Plascencia; Irvin González-López; Jean Pierre González; Jesús Hernández; Joel Armando Vázquez-Pérez.; Joel Armando Vázquez-Pérez.; Jorge Salas-Hernández; José Antonio Enciso-Moreno; José Arturo Martínez-Orozco; José Esteban Muñoz-Medina; José de Jesús Nuñez-Contreras; Juan Bautista Chale-Dzul; Julissa Enciso-Ibarra; Kathia Elizabeth Tapia-Díaz; Luis Alberto Ochoa-Carrera; Margarita Matias-Florentino; Mario Mújica-Sánchez; Marissa Perez-García; María Guadalupe Santiago-Mauricio; María Guadalupe de Jesús Mireles-Rivera; Nelly Sélem-Mojica; Pavel Isa; Ricardo Ciria Merce; Ricardo Grande; Rosa María Gutiérrez Rios; Santiago Ávila-Rios; Selene Zárate; Susana Lopez; Verónica Mata-Haro; Victor Eduardo Garcia-Arias; Victor Hugo Borja-Aburto |
| EPI_ISL_3898951, EPI_ISL_3898953, EPI_ISL_4419155, EPI_ISL_4419159, EPI_ISL_4419160, EPI_ISL_4419162, EPI_ISL_4419175 | see above                                                                  | Universidad del Valle                                                                                                                                              | Programa Nacional de Caracterización Genómica de SARS-CoV-2                                                                                                                                                                                                                                                                                                                                                                                                                                                                                                                                                                                                                                                                                                                                                                                                                                                                                                                                                                                                                                                                                                                                                                                                                                                                                                                                                                                                                                                                                                                                                                                                                                          |
| EPI_ISL_2091066, EPI_ISL_2193432, EPI_ISL_2193433, EPI_ISL_2193434                                                    | University Hospitals Translational Laboratory (UHTL), University Hospitals | University Hospitals Translational Laboratory (UHTL), University Hospitals                                                                                         | Alouani, D.; Sadri, N.; Song, X.                                                                                                                                                                                                                                                                                                                                                                                                                                                                                                                                                                                                                                                                                                                                                                                                                                                                                                                                                                                                                                                                                                                                                                                                                                                                                                                                                                                                                                                                                                                                                                                                                                                                     |
| EPI_ISL_2213596, EPI_ISL_2981948                                                                                      | University Hospitals of Geneva, Laboratory of Virology                     | HUG, Laboratory of Virology and the Health2030 Genome Center                                                                                                       | Ana Rita Goncalves; Deborah Penet; Emmanouil Dermitzakis; Henri Pegeot; Ioannis Xenarios; Keith Harshman; Laurent Kaiser; Lorenzo Cerutti; Melyssa Elies; Samuel Cordey                                                                                                                                                                                                                                                                                                                                                                                                                                                                                                                                                                                                                                                                                                                                                                                                                                                                                                                                                                                                                                                                                                                                                                                                                                                                                                                                                                                                                                                                                                                              |
| EPI_ISL_2136261                                                                                                       | University of Michigan Clinical Microbiology Laboratory                    | Lauring Lab, University of Michigan, Department of Microbiology and Immunology                                                                                     | Valesano                                                                                                                                                                                                                                                                                                                                                                                                                                                                                                                                                                                                                                                                                                                                                                                                                                                                                                                                                                                                                                                                                                                                                                                                                                                                                                                                                                                                                                                                                                                                                                                                                                                                                             |
| EPI_ISL_2845678                                                                                                       | Universitätsklinikum Köln; Institut für Virologie                          | Robert Koch Institute                                                                                                                                              |                                                                                                                                                                                                                                                                                                                                                                                                                                                                                                                                                                                                                                                                                                                                                                                                                                                                                                                                                                                                                                                                                                                                                                                                                                                                                                                                                                                                                                                                                                                                                                                                                                                                                                      |
| EPI_ISL_1658368                                                                                                       | Viollier AG                                                                | Department of Biosystems Science and Engineering, ETH Zurich                                                                                                       | Chaoran Chen; Christian Beisel; Christiane Beckmann; Christoph Noppen; David Dreifuss; Elodie Burcklen; Ina Nissen; Ivan Topolsky; Katharina Jahn; Lara Fuhrmann; Maurice Redondo; Mirjam Feldkamp; Natascha Santacroce; Niko Beerenwinkel; Noemie Santamaria de Souza; Olivier Kobel; Philipp Jablonski; Rebecca Denes; Sarah Nadeau; Sophie Seidel; Tanja Stadler                                                                                                                                                                                                                                                                                                                                                                                                                                                                                                                                                                                                                                                                                                                                                                                                                                                                                                                                                                                                                                                                                                                                                                                                                                                                                                                                  |
| EPI_ISL_2018547, EPI_ISL_2279495, EPI_ISL_3131904                                                                     | Wisconsin State Laboratory of Hygiene Communicable Disease Division        | Wisconsin State Laboratory of Hygiene Communicable Disease Division                                                                                                | Abigail C. Shockey; Alicia J. Mooney; Erika M. Hanson; Kelsey R. Florek; Richard Griesser; Sara Wagner; Tonya Danz                                                                                                                                                                                                                                                                                                                                                                                                                                                                                                                                                                                                                                                                                                                                                                                                                                                                                                                                                                                                                                                                                                                                                                                                                                                                                                                                                                                                                                                                                                                                                                                   |

We gratefully acknowledge the following Authors from the Originating laboratories responsible for obtaining the specimens, as well as the Submitting laboratories where the genome data were generated and shared via GISAID, on which this research is based.

All Submitters of data may be contacted directly via [www.gisaid.org](http://www.gisaid.org)

Authors are sorted alphabetically.

| Accession ID                                                                                                                                                                                                                                                                                                                                                        | Originating Laboratory                                                                       | Submitting Laboratory                                                                                                      | Authors                                                                                                                                                                                                                                                                                                                                                                                                                                                                                                                                                            |
|---------------------------------------------------------------------------------------------------------------------------------------------------------------------------------------------------------------------------------------------------------------------------------------------------------------------------------------------------------------------|----------------------------------------------------------------------------------------------|----------------------------------------------------------------------------------------------------------------------------|--------------------------------------------------------------------------------------------------------------------------------------------------------------------------------------------------------------------------------------------------------------------------------------------------------------------------------------------------------------------------------------------------------------------------------------------------------------------------------------------------------------------------------------------------------------------|
| EPI_ISL_4201403                                                                                                                                                                                                                                                                                                                                                     | "AK State Public Health Lab, State Health Department"                                        | Centers for Disease Control and Prevention Division of Viral Diseases, Pathogen Discovery                                  | Alex Burgin; Ben Rambo-Martin; Clinton Paden; Dakota Howard; Dave Wentworth; Dhvani Batra; Jasmine Padilla; Justin Lee; Krista Queen; Kristen Knipe; Kristine Lacek; Mark Burroughs; Matthew Schmerer; Meghan Bentz; Mili Sheth; Peter Cook; Sam Shepard; Sarah Nobles; Suxiang Tong; Vivien Dugan; Yvette Unonurmhi                                                                                                                                                                                                                                               |
| EPI_ISL_5058070, EPI_ISL_5058074, EPI_ISL_5058075, EPI_ISL_5058076, EPI_ISL_5058077, EPI_ISL_5058078, EPI_ISL_5058079, EPI_ISL_5058080, EPI_ISL_5058081                                                                                                                                                                                                             | see above                                                                                    | "Laboratorio de biotecnología, Universidad Icesi"                                                                          | "María I. Gutiérrez López; Adrián Camilo Rodríguez Ararat; Diana M. Florez Giraldo; Marcela Mercado; María F. Villegas Torres; Paola A. Caicedo Burbano"; Programa Nacional de Caracterización Genómica de SARS-CoV-2; Sara González Henao                                                                                                                                                                                                                                                                                                                         |
| EPI_ISL_5058067, EPI_ISL_5058068, EPI_ISL_5058069, EPI_ISL_5058071, EPI_ISL_5058072, EPI_ISL_5058073                                                                                                                                                                                                                                                                | "Unidad de Diagnóstico Hemato Oncológico - UDHO"                                             | "Laboratorio de biotecnología, Universidad Icesi"                                                                          | "María I. Gutiérrez López; Adrián Camilo Rodríguez Ararat; Diana M. Florez Giraldo; Marcela Mercado; María F. Villegas Torres; Paola A. Caicedo Burbano"; Programa Nacional de Caracterización Genómica de SARS-CoV-2; Sara González Henao                                                                                                                                                                                                                                                                                                                         |
| EPI_ISL_5797244, EPI_ISL_5797245, EPI_ISL_5797246, EPI_ISL_5797247                                                                                                                                                                                                                                                                                                  | "Unidad de Diagnóstico Hemato Oncológico - UDHO"                                             | Laboratorio de biotecnología, Universidad Icesi                                                                            | "María I. Gutiérrez López; Adrián Camilo Rodríguez Ararat; Diana M. Florez Giraldo; Marcela Mercado; María F. Villegas Torres; Paola A. Caicedo Burbano"; Programa Nacional de Caracterización Genómica de SARS-CoV-2; Sara González Henao                                                                                                                                                                                                                                                                                                                         |
| EPI_ISL_3347204, EPI_ISL_3347205, EPI_ISL_3347206, EPI_ISL_3347207, EPI_ISL_4958014, EPI_ISL_4958015, EPI_ISL_4958016, EPI_ISL_4958023, EPI_ISL_4958024, EPI_ISL_4960530, EPI_ISL_4960531, EPI_ISL_4960540, EPI_ISL_4960542, EPI_ISL_4984633, EPI_ISL_5923349, EPI_ISL_5923351, EPI_ISL_5923352, EPI_ISL_5923353, EPI_ISL_5923354, EPI_ISL_6575526, EPI_ISL_6575528 | see above                                                                                    | Laboratorio Departamental de Salud Pública de Antioquia                                                                    | Ana Victoria Valencia Duarte; Andres F. Cardona-Rios; Cristian Arbey Velarde Hoyos; Gloria Isabel Escobar; Idabely Betancur Ortiz; Juan P. Hernandez-Ortiz; Juan Pablo Isaza Agudelo; Maria Stella López                                                                                                                                                                                                                                                                                                                                                           |
| EPI_ISL_2621218                                                                                                                                                                                                                                                                                                                                                     | ADILAB                                                                                       | Universidad Nacional de Colombia - Laboratorio Genómico One Health                                                         | Andres F. Cardona-Rios; Carlos Franco-Muñoz; Carolina Muñoz-Arango; Celeny Ortiz; Daniel O. Maldonado-Perez; Diego A. Álvarez-Díaz; Hector Alejandro Ruiz-Moreno; Idabely Betancur Ortiz; Jorge E. Osorio; Juan P. Hernandez-Ortiz; Karl A Ciuderis; Katherine Laiton-Donato; Laura Silvana Perez; Lina M. Hurtado; Marcela Mercado-Reyes; Maria Angélica Maya; Maria Stella López; Rita Almanza Payares; Sandra Ines Cano; Simón Villegas Velásquez                                                                                                               |
| EPI_ISL_5887322                                                                                                                                                                                                                                                                                                                                                     | ADPH                                                                                         | ADPH                                                                                                                       | Adrianna Walker                                                                                                                                                                                                                                                                                                                                                                                                                                                                                                                                                    |
| EPI_ISL_3878175                                                                                                                                                                                                                                                                                                                                                     | AFIP                                                                                         | Instituto Butantan                                                                                                         | Antonio Jorge Martins; Claudia Renata dos Santos Barros; David Schlesinger; Debora Botequão Moretti; Dimas Tadeu Covas; Elaine Cristina Marquezue; Elaine Vieira Santos; Evandra Strazza Rodrigues; Heidge Fukumasu; Jayme Augusto de Souza-Neto; José Salvatore Leister Patané; Luiz Alcantara; Luiz Lehmann Coutinho; Maria Carolina Elias; Mauricio Lacerda Nogueira; Rafael dos Santos Bezerra; Raul Machado Neto; Rejane Maria Tommasini Grotto; Ricardo Haddad; Sandra Coccuzzo Sampaio Vessoni; Simone Kashima; Svetoslav Nanev Slavov; Vincent Louis Viala |
| EPI_ISL_2179088                                                                                                                                                                                                                                                                                                                                                     | AR Dept. of Health-PHL, Molecular Diagnostics                                                | Genomics and Discovery, Respiratory Viruses Branch, Division of Viral Diseases, Centers for Disease Control and Prevention | Adam Retchless; Anna Kelleher; Anna Uehara; Brian Lynch; Clinton R. Paden; Dhvani Batra; Haibin Wang; Han Jia Justin Ng; Jasmine Padilla; Jjing Zhang; Justin Lee; Krista Queen; Mark Burroughs; Mili Sheth; Morgan Davis; Peter Cook; Rachel Marine; Sarah Nobles; Suxiang Tong; Tara Coalter; Yan Li; Ying Tao                                                                                                                                                                                                                                                   |
| EPI_ISL_3298324, EPI_ISL_3298351, EPI_ISL_3298358, EPI_ISL_3948498                                                                                                                                                                                                                                                                                                  | AREA DE SALUD ACOSTA                                                                         | Inciensa, Instituto Costarricense de Investigación y Enseñanza en Nutrición y Salud                                        | Adriana Godínez; Claudio Soto-Garita; Estela Cordero; Francisco Duarte; Hebleen Porras; José Luis Vargas; Mariela Gutiérrez & Joselyn Prado; Melany Calderón                                                                                                                                                                                                                                                                                                                                                                                                       |
| EPI_ISL_3274361, EPI_ISL_3274362                                                                                                                                                                                                                                                                                                                                    | AREA DE SALUD ACOSTA [ACOSTA/SAN JOSE]                                                       | Inciensa, Instituto Costarricense de Investigación y Enseñanza en Nutrición y Salud                                        | & Nazareth Ruiz; Adriana Godínez; Caterina Guzmán; Claudio Soto-Garita; Estela Cordero; Francisco Duarte; Hebleen Porras; José Luis Vargas; Mariela Gutiérrez Joselyn Prado; Melany Calderón                                                                                                                                                                                                                                                                                                                                                                       |
| EPI_ISL_3298331, EPI_ISL_3298332                                                                                                                                                                                                                                                                                                                                    | AREA DE SALUD ALAJUELA CENTRAL                                                               | Inciensa, Instituto Costarricense de Investigación y Enseñanza en Nutrición y Salud                                        | Adriana Godínez; Claudio Soto-Garita; Estela Cordero; Francisco Duarte; Hebleen Porras; José Luis Vargas; Mariela Gutiérrez & Joselyn Prado; Melany Calderón                                                                                                                                                                                                                                                                                                                                                                                                       |
| EPI_ISL_3298333, EPI_ISL_3948499                                                                                                                                                                                                                                                                                                                                    | AREA DE SALUD ALAJUELITA                                                                     | Inciensa, Instituto Costarricense de Investigación y Enseñanza en Nutrición y Salud                                        | Adriana Godínez; Claudio Soto-Garita; Estela Cordero; Francisco Duarte; Hebleen Porras; José Luis Vargas; Mariela Gutiérrez & Joselyn Prado; Melany Calderón                                                                                                                                                                                                                                                                                                                                                                                                       |
| EPI_ISL_3274356, EPI_ISL_4258609                                                                                                                                                                                                                                                                                                                                    | AREA DE SALUD ATENAS                                                                         | Inciensa, Instituto Costarricense de Investigación y Enseñanza en Nutrición y Salud                                        | Adriana Godínez; Caterina Guzmán; Claudio Soto-Garita; Estela Cordero; Francisco Duarte; Hebleen Porras; Joselyn Prado & Marilyn Alfaro Segura; José Luis Vargas; Mariela Gutiérrez; Mariela Gutiérrez Joselyn Prado; Melany Calderón; Nazareth Ruiz & Benito Vega                                                                                                                                                                                                                                                                                                 |
| EPI_ISL_5914875                                                                                                                                                                                                                                                                                                                                                     | AREA DE SALUD BARVA (COOPESIBA)                                                              | Inciensa, Instituto Costarricense de Investigación y Enseñanza en Nutrición y Salud                                        | Adriana Godínez; Claudio Soto-Garita; Estela Cordero; Francisco Duarte; Hebleen Porras; José Luis Vargas; Mariela Gutiérrez; Melany Calderón; Sofia Herrera & Angélica Espinoza Fontana                                                                                                                                                                                                                                                                                                                                                                            |
| EPI_ISL_3298335                                                                                                                                                                                                                                                                                                                                                     | AREA DE SALUD CARTAGO                                                                        | Inciensa, Instituto Costarricense de Investigación y Enseñanza en Nutrición y Salud                                        | Adriana Godínez; Claudio Soto-Garita; Estela Cordero; Francisco Duarte; Hebleen Porras; Joselyn Prado & Monserrat Segura; José Luis Vargas; Mariela Gutiérrez; Melany Calderón                                                                                                                                                                                                                                                                                                                                                                                     |
| EPI_ISL_4258613                                                                                                                                                                                                                                                                                                                                                     | AREA DE SALUD CORRALILLO                                                                     | Inciensa, Instituto Costarricense de Investigación y Enseñanza en Nutrición y Salud                                        | Adriana Godínez; Claudio Soto-Garita; Estela Cordero; Francisco Duarte; Hebleen Porras; Joselyn Prado & Natasha Tames Robles; José Luis Vargas; Mariela Gutiérrez; Melany Calderón                                                                                                                                                                                                                                                                                                                                                                                 |
| EPI_ISL_3298360, EPI_ISL_3948514                                                                                                                                                                                                                                                                                                                                    | AREA DE SALUD CORREDORES                                                                     | Inciensa, Instituto Costarricense de Investigación y Enseñanza en Nutrición y Salud                                        | Adriana Godínez; Claudio Soto-Garita; Estela Cordero; Francisco Duarte; Hebleen Porras; Joselyn Prado & Raul Zeledon; Joselyn Prado & Susana Mata; José Luis Vargas; Mariela Gutiérrez; Melany Calderón                                                                                                                                                                                                                                                                                                                                                            |
| EPI_ISL_3298355                                                                                                                                                                                                                                                                                                                                                     | AREA DE SALUD COTO BRUS                                                                      | Inciensa, Instituto Costarricense de Investigación y Enseñanza en Nutrición y Salud                                        | Adriana Godínez; Claudio Soto-Garita; Estela Cordero; Francisco Duarte; Hebleen Porras; José Luis Vargas; Mariela Gutiérrez & Joselyn Prado; Melany Calderón                                                                                                                                                                                                                                                                                                                                                                                                       |
| EPI_ISL_3298330                                                                                                                                                                                                                                                                                                                                                     | AREA DE SALUD CURRIDABAT                                                                     | Inciensa, Instituto Costarricense de Investigación y Enseñanza en Nutrición y Salud                                        | Adriana Godínez; Claudio Soto-Garita; Estela Cordero; Francisco Duarte; Hebleen Porras; José Luis Vargas; Mariela Gutiérrez & Joselyn Prado; Melany Calderón                                                                                                                                                                                                                                                                                                                                                                                                       |
| EPI_ISL_3274353, EPI_ISL_3274354, EPI_ISL_3274360, EPI_ISL_3639120                                                                                                                                                                                                                                                                                                  | AREA DE SALUD DESAMPARADOS 1 - CLINICA DR. MARCIAL FALLAS                                    | Inciensa, Instituto Costarricense de Investigación y Enseñanza en Nutrición y Salud                                        | & Nazareth Ruiz; Adriana Godínez; Caterina Guzmán; Claudio Soto-Garita; Estela Cordero; Francisco Duarte; Hebleen Porras; Joselyn Prado & Juliana Mora; José Luis Vargas; Mariela Gutiérrez; Mariela Gutiérrez Joselyn Prado; Melany Calderón; Nazareth Ruiz & Juliana Mora Cortes                                                                                                                                                                                                                                                                                 |
| EPI_ISL_3274364                                                                                                                                                                                                                                                                                                                                                     | AREA DE SALUD DESAMPARADOS 1 - CLINICA DR. MARCIAL FALLAS [GRIFO ALTO/DESAMPARADOS/SAN JOSE] | Inciensa, Instituto Costarricense de Investigación y Enseñanza en Nutrición y Salud                                        | & Nazareth Ruiz; Adriana Godínez; Caterina Guzmán; Claudio Soto-Garita; Estela Cordero; Francisco Duarte; Hebleen Porras; José Luis Vargas; Mariela Gutiérrez Joselyn Prado; Melany Calderón                                                                                                                                                                                                                                                                                                                                                                       |
| EPI_ISL_3948497, EPI_ISL_3948546                                                                                                                                                                                                                                                                                                                                    | AREA DE SALUD DESAMPARADOS 2 (COOPESALUD)                                                    | Inciensa, Instituto Costarricense de Investigación y Enseñanza en Nutrición y Salud                                        | Adriana Godínez; Claudio Soto-Garita; Estela Cordero; Francisco Duarte; Hebleen Porras; Joselyn Prado & Juliana Mora; José Luis Vargas; Mariela Gutiérrez; Melany Calderón                                                                                                                                                                                                                                                                                                                                                                                         |
| EPI_ISL_3298371                                                                                                                                                                                                                                                                                                                                                     | AREA DE SALUD FORTUNA                                                                        | Inciensa, Instituto Costarricense de Investigación y Enseñanza en Nutrición y Salud                                        | Adriana Godínez; Claudio Soto-Garita; Estela Cordero; Francisco Duarte; Hebleen Porras; Joselyn Prado & Carolina Arrieta; José Luis Vargas; Mariela Gutiérrez; Melany Calderón                                                                                                                                                                                                                                                                                                                                                                                     |
| EPI_ISL_3638888                                                                                                                                                                                                                                                                                                                                                     | AREA DE SALUD GOICOECHEA 2 - CLINICA DR. JIMENEZ NUÑEZ                                       | Inciensa, Instituto Costarricense de Investigación y Enseñanza en Nutrición y Salud                                        | Adriana Godínez; Claudio Soto-Garita; Estela Cordero; Francisco Duarte; Hebleen Porras; Joselyn Prado & Juan Carlos Cartes; José Luis Vargas; Mariela Gutiérrez; Melany Calderón                                                                                                                                                                                                                                                                                                                                                                                   |
| EPI_ISL_3948532                                                                                                                                                                                                                                                                                                                                                     | AREA DE SALUD HEREDIA-VIRILLA                                                                | Inciensa, Instituto Costarricense de Investigación y Enseñanza en Nutrición y Salud                                        | Adriana Godínez; Claudio Soto-Garita; Estela Cordero; Francisco Duarte; Hebleen Porras; José Luis Vargas; Mariela Gutiérrez & Joselyn Prado; Melany Calderón                                                                                                                                                                                                                                                                                                                                                                                                       |
| EPI_ISL_3948484                                                                                                                                                                                                                                                                                                                                                     | AREA DE SALUD MATA REDONDA-HOSPITAL - CLINICA DR. MORENO CAÑAS                               | Inciensa, Instituto Costarricense de Investigación y Enseñanza en Nutrición y Salud                                        | Adriana Godínez; Claudio Soto-Garita; Estela Cordero; Francisco Duarte; Hebleen Porras; Joselyn Prado & Ricardo González; José Luis Vargas; Mariela Gutiérrez; Melany Calderón                                                                                                                                                                                                                                                                                                                                                                                     |







|                                                                                                                                                                                                                                                                                                                                                                     |                                                                                                                                                                            |                                                                                                                        |                                                                                                                                                                                                                                                                                                                                                                                                                                                                                                                                                                                                                                                                                                                                                                                                                                                                                                                                                                                                                                                                                                                                                                                                                                                                                                                                                                                                                                                                                                                                                                                                                                                                                                                                                                                     |                                                                                                                            |
|---------------------------------------------------------------------------------------------------------------------------------------------------------------------------------------------------------------------------------------------------------------------------------------------------------------------------------------------------------------------|----------------------------------------------------------------------------------------------------------------------------------------------------------------------------|------------------------------------------------------------------------------------------------------------------------|-------------------------------------------------------------------------------------------------------------------------------------------------------------------------------------------------------------------------------------------------------------------------------------------------------------------------------------------------------------------------------------------------------------------------------------------------------------------------------------------------------------------------------------------------------------------------------------------------------------------------------------------------------------------------------------------------------------------------------------------------------------------------------------------------------------------------------------------------------------------------------------------------------------------------------------------------------------------------------------------------------------------------------------------------------------------------------------------------------------------------------------------------------------------------------------------------------------------------------------------------------------------------------------------------------------------------------------------------------------------------------------------------------------------------------------------------------------------------------------------------------------------------------------------------------------------------------------------------------------------------------------------------------------------------------------------------------------------------------------------------------------------------------------|----------------------------------------------------------------------------------------------------------------------------|
| EPI_ISL_2695346                                                                                                                                                                                                                                                                                                                                                     | CHEDV                                                                                                                                                                      | Instituto Nacional de Saude (INSA)                                                                                     |                                                                                                                                                                                                                                                                                                                                                                                                                                                                                                                                                                                                                                                                                                                                                                                                                                                                                                                                                                                                                                                                                                                                                                                                                                                                                                                                                                                                                                                                                                                                                                                                                                                                                                                                                                                     | Borges et al                                                                                                               |
| EPI_ISL_3432133                                                                                                                                                                                                                                                                                                                                                     | CHTMAD                                                                                                                                                                     | Instituto Nacional de Saude (INSA)                                                                                     |                                                                                                                                                                                                                                                                                                                                                                                                                                                                                                                                                                                                                                                                                                                                                                                                                                                                                                                                                                                                                                                                                                                                                                                                                                                                                                                                                                                                                                                                                                                                                                                                                                                                                                                                                                                     | Borges et al                                                                                                               |
| EPI_ISL_3838194,<br>EPI_ISL_3838195,<br>EPI_ISL_3838196                                                                                                                                                                                                                                                                                                             | CHU NIMES                                                                                                                                                                  | CHU NIMES                                                                                                              |                                                                                                                                                                                                                                                                                                                                                                                                                                                                                                                                                                                                                                                                                                                                                                                                                                                                                                                                                                                                                                                                                                                                                                                                                                                                                                                                                                                                                                                                                                                                                                                                                                                                                                                                                                                     | Agathe Boudet; Marie-Josée Carles; Sophie Bravo; Stephan Robin                                                             |
| EPI_ISL_6124117                                                                                                                                                                                                                                                                                                                                                     | CHU Pontchaillou                                                                                                                                                           | CHU Pontchaillou                                                                                                       | DE TAYRAC Marie; DENOUAL Florent; ETCHEVERRY Amandine; FEBREAU Christine; GALIBERT Marie Dominique; GROLHIER Claire; JAGLINE Steven; PRONIER Charlotte; QUENET Benjamin; SASSI Mohamed; THIBAUT Vincent                                                                                                                                                                                                                                                                                                                                                                                                                                                                                                                                                                                                                                                                                                                                                                                                                                                                                                                                                                                                                                                                                                                                                                                                                                                                                                                                                                                                                                                                                                                                                                             |                                                                                                                            |
| EPI_ISL_2796193                                                                                                                                                                                                                                                                                                                                                     | CHU Sao Joao, Porto                                                                                                                                                        | Instituto Nacional de Saude (INSA)                                                                                     |                                                                                                                                                                                                                                                                                                                                                                                                                                                                                                                                                                                                                                                                                                                                                                                                                                                                                                                                                                                                                                                                                                                                                                                                                                                                                                                                                                                                                                                                                                                                                                                                                                                                                                                                                                                     | Borges et al                                                                                                               |
| EPI_ISL_2695100,<br>EPI_ISL_2695101,<br>EPI_ISL_2695102                                                                                                                                                                                                                                                                                                             | CHULN - H Santa Maria                                                                                                                                                      | Instituto Nacional de Saude (INSA)                                                                                     |                                                                                                                                                                                                                                                                                                                                                                                                                                                                                                                                                                                                                                                                                                                                                                                                                                                                                                                                                                                                                                                                                                                                                                                                                                                                                                                                                                                                                                                                                                                                                                                                                                                                                                                                                                                     | Borges et al                                                                                                               |
| EPI_ISL_2500506,<br>EPI_ISL_2500516,<br>EPI_ISL_2622106,<br>EPI_ISL_3267818                                                                                                                                                                                                                                                                                         | CHUV                                                                                                                                                                       | Laboratory of genomics and metagenomics                                                                                |                                                                                                                                                                                                                                                                                                                                                                                                                                                                                                                                                                                                                                                                                                                                                                                                                                                                                                                                                                                                                                                                                                                                                                                                                                                                                                                                                                                                                                                                                                                                                                                                                                                                                                                                                                                     | Claire Bertelli; Damien Jacot; Gilbert Greub; Sébastien Aeby; Trestan Pilonel                                              |
| EPI_ISL_4960513,<br>EPI_ISL_4960514                                                                                                                                                                                                                                                                                                                                 | CLINICA EL ROSARIO SEDE TESORO                                                                                                                                             | Laboratorio Departamental de Salud Publica de Antioquia                                                                |                                                                                                                                                                                                                                                                                                                                                                                                                                                                                                                                                                                                                                                                                                                                                                                                                                                                                                                                                                                                                                                                                                                                                                                                                                                                                                                                                                                                                                                                                                                                                                                                                                                                                                                                                                                     | Cristian Arbey Velarde Hoyos; Gloria Isabel Escobar; Idabely Betancur Ortiz; Juan P. Hernandez-Ortiz; Maria Stella López   |
| EPI_ISL_3459396,<br>EPI_ISL_3459397                                                                                                                                                                                                                                                                                                                                 | CLINICA IBEROAMERICANA                                                                                                                                                     | Instituto Nacional de Salud                                                                                            | Carlos Franco-Muñoz; Carmen Osorio; Diana Malo; Diego A. Álvarez-Díaz; Diego Andrés Prada; Gerardo Santamaría; Hector Alejandro Ruiz-Moreno; Jhonnatan Reales-González; Jorge Rivera; Juan Camilo Martínez; Julian Naizaque; Katherine Laiton-Donato; Lisseth Pardo; Magdalena Wiesner; Marcela Mercado-Reyes; María T. Herrera-Sepúlveda; Marta Lopez Blanco; Martha Lucia Ospina Martínez; Paola Rojas; Sergio Gomez; Sheryll Corchuelo; Ángela Alarcon Cruz                                                                                                                                                                                                                                                                                                                                                                                                                                                                                                                                                                                                                                                                                                                                                                                                                                                                                                                                                                                                                                                                                                                                                                                                                                                                                                                      |                                                                                                                            |
| EPI_ISL_3459406,<br>EPI_ISL_3459408                                                                                                                                                                                                                                                                                                                                 | CLINICA PRIMAVERA DE VILLAVICENCIO                                                                                                                                         | Instituto Nacional de Salud                                                                                            | Carlos Franco-Muñoz; Carmen Osorio; Diana Malo; Diego A. Álvarez-Díaz; Diego Andrés Prada; Gerardo Santamaría; Hector Alejandro Ruiz-Moreno; Jhonnatan Reales-González; Jorge Rivera; Juan Camilo Martínez; Julian Naizaque; Katherine Laiton-Donato; Lisseth Pardo; Magdalena Wiesner; Marcela Mercado-Reyes; María T. Herrera-Sepúlveda; Marta Lopez Blanco; Martha Lucia Ospina Martínez; Paola Rojas; Sergio Gomez; Sheryll Corchuelo; Ángela Alarcon Cruz                                                                                                                                                                                                                                                                                                                                                                                                                                                                                                                                                                                                                                                                                                                                                                                                                                                                                                                                                                                                                                                                                                                                                                                                                                                                                                                      |                                                                                                                            |
| EPI_ISL_5054456, EPI_ISL_5054457, EPI_ISL_5054459, EPI_ISL_5054461, EPI_ISL_5054462, EPI_ISL_5054463, EPI_ISL_5054464, EPI_ISL_5054465                                                                                                                                                                                                                              | see above                                                                                                                                                                  | CLINIZAD                                                                                                               | Gencore - Universidad de los Andes                                                                                                                                                                                                                                                                                                                                                                                                                                                                                                                                                                                                                                                                                                                                                                                                                                                                                                                                                                                                                                                                                                                                                                                                                                                                                                                                                                                                                                                                                                                                                                                                                                                                                                                                                  | Cristian Barrera; David González; Gabriela Ariza; Luisa Sacristan; Marcela Guevara; Marcela Mercado; Silvia Restrepo       |
| EPI_ISL_505464,<br>EPI_ISL_505465,<br>EPI_ISL_5071188,<br>EPI_ISL_5071201,<br>EPI_ISL_5072501,<br>EPI_ISL_5072513                                                                                                                                                                                                                                                   | COLCAN                                                                                                                                                                     | Instituto Nacional de Salud- Dirección de Investigación en Salud Pública                                               | Beatriz de Arco; Carlos Franco-Muñoz; Carmen Osorio; Diana Malo; Diego A. Álvarez-Díaz; Diego Andrés Prada; Gerardo Santamaría; Hector Alejandro Ruiz-Moreno; Jhonnatan Reales-González; Jorge Rivera; Juan Camilo Martínez; Julian Naizaque; Katherine Laiton-Donato; Lisseth Pardo; Magdalena Wiesner; Marcela Mercado-Reyes; María T. Herrera-Sepúlveda; Marta Lopez Blanco; Martha Lucia Ospina Martínez; Paola Rojas; Paola Rojas-Estevéz; Sergio Gomez; Sheryll Corchuelo; Tatiana Cobos; Ángela Alarcon Cruz                                                                                                                                                                                                                                                                                                                                                                                                                                                                                                                                                                                                                                                                                                                                                                                                                                                                                                                                                                                                                                                                                                                                                                                                                                                                 |                                                                                                                            |
| EPI_ISL_5054466, EPI_ISL_5054467, EPI_ISL_5054468, EPI_ISL_5054469, EPI_ISL_5054471, EPI_ISL_5054472, EPI_ISL_5054473, EPI_ISL_5054475, EPI_ISL_5054477, EPI_ISL_5054479, EPI_ISL_5054481, EPI_ISL_5054485, EPI_ISL_5054488, EPI_ISL_5054491, EPI_ISL_5054492, EPI_ISL_5054494, EPI_ISL_5054495, EPI_ISL_5054496, EPI_ISL_5054498, EPI_ISL_5054500, EPI_ISL_5054501 | see above                                                                                                                                                                  | COLCAN - INS                                                                                                           | Gencore - Universidad de los Andes                                                                                                                                                                                                                                                                                                                                                                                                                                                                                                                                                                                                                                                                                                                                                                                                                                                                                                                                                                                                                                                                                                                                                                                                                                                                                                                                                                                                                                                                                                                                                                                                                                                                                                                                                  | Cristian Barrera; David González; Gabriela Ariza; Luisa Sacristan; Marcela Guevara; Marcela Mercado; Silvia Restrepo       |
| EPI_ISL_2674313                                                                                                                                                                                                                                                                                                                                                     | COMFANDI - SAN NICOLAS                                                                                                                                                     | Instituto Nacional de Salud- Dirección de Investigación en Salud Pública                                               | Carlos Franco-Muñoz; Carmen Osorio; Diana Malo; Diego A. Álvarez-Díaz; Diego Andrés Prada; Gerardo Santamaría; Hector Alejandro Ruiz-Moreno; Jhonnatan Reales-González; Jorge Rivera; Juan Camilo Martínez; Julian Naizaque; Katherine Laiton-Donato; Lisseth Pardo; Magdalena Wiesner; Marcela Mercado-Reyes; María T. Herrera-Sepúlveda; Marta Lopez Blanco; Martha Lucia Ospina Martínez; Paola Rojas; Sergio Gomez; Sheryll Corchuelo; Ángela Alarcon Cruz                                                                                                                                                                                                                                                                                                                                                                                                                                                                                                                                                                                                                                                                                                                                                                                                                                                                                                                                                                                                                                                                                                                                                                                                                                                                                                                      |                                                                                                                            |
| EPI_ISL_2657867,<br>EPI_ISL_2657868                                                                                                                                                                                                                                                                                                                                 | COVID 19- EPS FAMISANAR                                                                                                                                                    | Instituto Nacional de Salud- Dirección de Investigación en Salud Pública                                               | Carlos Franco-Muñoz; Carmen Osorio; Diana Malo; Diego A. Álvarez-Díaz; Diego Andrés Prada; Gerardo Santamaría; Hector Alejandro Ruiz-Moreno; Jhonnatan Reales-González; Jorge Rivera; Juan Camilo Martínez; Julian Naizaque; Katherine Laiton-Donato; Lisseth Pardo; Magdalena Wiesner; Marcela Mercado-Reyes; María T. Herrera-Sepúlveda; Marta Lopez Blanco; Martha Lucia Ospina Martínez; Paola Rojas; Sergio Gomez; Sheryll Corchuelo; Ángela Alarcon Cruz                                                                                                                                                                                                                                                                                                                                                                                                                                                                                                                                                                                                                                                                                                                                                                                                                                                                                                                                                                                                                                                                                                                                                                                                                                                                                                                      |                                                                                                                            |
| EPI_ISL_5858432,<br>EPI_ISL_5858433                                                                                                                                                                                                                                                                                                                                 | California Animal Health and Food Safety Laboratory - University of California-Davis                                                                                       | Diagnostic Virology Laboratory, National Veterinary Services Laboratories, USDA1920 Dayton Avenue, Ames, IA 50010, USA |                                                                                                                                                                                                                                                                                                                                                                                                                                                                                                                                                                                                                                                                                                                                                                                                                                                                                                                                                                                                                                                                                                                                                                                                                                                                                                                                                                                                                                                                                                                                                                                                                                                                                                                                                                                     | Emily R. Love; Kerrie M. Franzen; Mary L. Killian; Mia Torchetti; Suelele Robbe-Austerman; Tod P. Stuber                   |
| EPI_ISL_3276685                                                                                                                                                                                                                                                                                                                                                     | California Hospital Medical Center                                                                                                                                         | Los Angeles County Public Health Laboratories                                                                          |                                                                                                                                                                                                                                                                                                                                                                                                                                                                                                                                                                                                                                                                                                                                                                                                                                                                                                                                                                                                                                                                                                                                                                                                                                                                                                                                                                                                                                                                                                                                                                                                                                                                                                                                                                                     | P. Hemarajata et al.                                                                                                       |
| EPI_ISL_3505609,<br>EPI_ISL_3505631                                                                                                                                                                                                                                                                                                                                 | Center for Research on Health in Latin America                                                                                                                             | Institute of Microbiology, Universidad San Francisco de Quito                                                          | Belén Prado-Vivar; Bernardo Gutiérrez; Erika B. Muñoz; Erika Muñoz; Fernanda Zurita; Gabriel Trueba; Jaime Costales; Juan José Guadalupe; Michelle Grunauer; Monica Becerra-Wong; Patricio Rojas-Silva; Paúl Cárdenas; Sully Márquez; Verónica Barragán                                                                                                                                                                                                                                                                                                                                                                                                                                                                                                                                                                                                                                                                                                                                                                                                                                                                                                                                                                                                                                                                                                                                                                                                                                                                                                                                                                                                                                                                                                                             |                                                                                                                            |
| EPI_ISL_3008830                                                                                                                                                                                                                                                                                                                                                     | Center of Advanced Studies and Technology, Molecular Genetics Laboratory                                                                                                   | Center of Advanced Studies and Technology, Molecular Genetics Laboratory                                               |                                                                                                                                                                                                                                                                                                                                                                                                                                                                                                                                                                                                                                                                                                                                                                                                                                                                                                                                                                                                                                                                                                                                                                                                                                                                                                                                                                                                                                                                                                                                                                                                                                                                                                                                                                                     | Anaclerio Federico; De Fabritiis Simone                                                                                    |
| EPI_ISL_2756557                                                                                                                                                                                                                                                                                                                                                     | Centers for Disease Control and Prevention, Dengue Branch                                                                                                                  | Centers for Disease Control and Prevention, Dengue Branch                                                              |                                                                                                                                                                                                                                                                                                                                                                                                                                                                                                                                                                                                                                                                                                                                                                                                                                                                                                                                                                                                                                                                                                                                                                                                                                                                                                                                                                                                                                                                                                                                                                                                                                                                                                                                                                                     | Betzabel Flores; Gabriela Paz-Bailey; Gilberto A. Santiago; Glenda Gonzalez; Jorge L. Munoz-Jordan; Keyla Charriez         |
| EPI_ISL_5146270,<br>EPI_ISL_5146272,<br>EPI_ISL_5146273,<br>EPI_ISL_5146274,<br>EPI_ISL_5146278,<br>EPI_ISL_5146279                                                                                                                                                                                                                                                 | Centro Diagnóstico Clínico CDC                                                                                                                                             | Laboratorio de Biología Molecular y Biotecnología - Universidad Tecnológica de Pereira                                 |                                                                                                                                                                                                                                                                                                                                                                                                                                                                                                                                                                                                                                                                                                                                                                                                                                                                                                                                                                                                                                                                                                                                                                                                                                                                                                                                                                                                                                                                                                                                                                                                                                                                                                                                                                                     | Augusto Zuluaga-Velez; Fredy A. Tabares-Villa; Juan C. Sepulveda; Juan D. Anacona-Montilla; Marcela Orjuela-Rodríguez      |
| EPI_ISL_3371422,<br>EPI_ISL_3371427                                                                                                                                                                                                                                                                                                                                 | Centro Medico ABC                                                                                                                                                          | Instituto Nacional de Medicina Genomica                                                                                | Blancas S; Cedro-Tanda A; Cesar Lara; Cisneros-Villanueva M; Daniel Aguirre M; Escobar-Arazola MA; Herrera-Montalvo LA.; Hidalgo-Miranda A; Jacomine Reyes-Carrasco; Mendoza-Vargas A; Munguia-Garza P; Ramirez-Vega O; Rangel-DeLeon D; Reyes-Grajeda JP; Roxana Trejo-González                                                                                                                                                                                                                                                                                                                                                                                                                                                                                                                                                                                                                                                                                                                                                                                                                                                                                                                                                                                                                                                                                                                                                                                                                                                                                                                                                                                                                                                                                                    |                                                                                                                            |
| EPI_ISL_4561025                                                                                                                                                                                                                                                                                                                                                     | Centro de Biología Molecular Severo Ochoa // Unidad de Vigilancia de Salud y Medicina del Trabajo del CSIC. Consejo Superior de Investigaciones Científicas (CSIC), Madrid | SeqCOVID-SPAIN consortium/IBV(CSIC)                                                                                    |                                                                                                                                                                                                                                                                                                                                                                                                                                                                                                                                                                                                                                                                                                                                                                                                                                                                                                                                                                                                                                                                                                                                                                                                                                                                                                                                                                                                                                                                                                                                                                                                                                                                                                                                                                                     | Antonio Alcami; Begoña Aguado; Juncal Sánchez and SeqCOVID-SPAIN consortium; Marta Bernejo                                 |
| EPI_ISL_3568785,<br>EPI_ISL_3568786,<br>EPI_ISL_3568787,<br>EPI_ISL_3568828,<br>EPI_ISL_5332884                                                                                                                                                                                                                                                                     | Centro de Investigación Biomedica de Occidente (CIBO)                                                                                                                      | Unidad de Genomica Avanzada                                                                                            | ; Alejandra García-Gasca; Alejandra Hernández-Teran; Alejandro Sanchez-Flores; Alfredo Herrera-Estrella; Alicia Ocaña-Mondragón; Andreu Comas-García; Angel Gustavo Salas-Lais; Antonio Loza Roman; Bernardo Martínez-Miguel; Blanca Taboada; Brenda Irasema Maldonado-Meza; Bruno Gomez-Gil; Carla Ivon Herrera-Najera; Carlos F. Arias; Celia Boukadida; Celia Duque Molina; Celida Martinez- Rodriguez; Clara Esperanza Santacruz-Tinoco; Concepcion Grajales-Muñiz; Consorcio Mexicano de Vigilancia Genómica (CoViGen-Mex). Authors (in alphabetical order): Julio Elias Alvarado-Yaah; Cristóbal Chaidez-Quiroz; Daniel Fregoso-Rueda; Daniel Lira Morales; Eduardo Becerril-Vargas; Fernando Fontove-Herrera; Fidencio Mejía-Nepomuceno; Francisco Pulido; Gloria Elena Espinosa-Ayala; Gloria María Molina-Salinas; Gloria Vazquez; Hector Esteban Paz-Juárez; Hector Montoya-Fuentes; Helen Haydee Fernanda Ramirez-Plascencia; Irvin González-Lopez; Jean Pierre Gonzalez; Jesus Hernandez; Joel Armando Vázquez-Pérez.; Jorge Salas-Hernández; Jose Antonio Enciso-Moreno; Jose Arturo Martinez-Orozco; Jose Esteban Muñoz-Medina; Jose de Jesus Nuñez-Contreras; Juan Bautista Chale-Dzul; Julissa Enciso-Ibarra; Luis Alberto Ochoa-Carrera; Margarita Matias-Florentino; María Guadalupe Santiago-Mauricio; María Guadalupe de Jesús Mireles-Rivera; Mario Mujica-Sánchez; Marissa Perez-García; Nelly Selém-Mojica; Pavel Isa; Ricardo Ciria Merce; Ricardo Grande; Rosa María Gutierrez Rios; Santiago avila-Rios; Selene Zarate; Susana Lopez; Veronica Mata-Haro; Victor Eduardo Garcia-Arias; Victor Hugo Borja-Aburto                                                                                                                                           |                                                                                                                            |
| EPI_ISL_3568789,<br>EPI_ISL_3568829,<br>EPI_ISL_3568830                                                                                                                                                                                                                                                                                                             | Centro de Investigación Biomedica del Noreste (CIBIN)                                                                                                                      | Unidad de Genomica Avanzada                                                                                            | ; Alejandra García-Gasca; Alejandra Hernández-Teran; Alejandro Sanchez-Flores; Alfredo Herrera-Estrella; Alicia Ocaña-Mondragón; Andreu Comas-García; Angel Gustavo Salas-Lais; Antonio Loza Roman; Bernardo Martínez-Miguel; Blanca Taboada; Brenda Irasema Maldonado-Meza; Bruno Gomez-Gil; Carla Ivon Herrera-Najera; Carlos F. Arias; Celia Boukadida; Clara Esperanza Santacruz-Tinoco; Concepcion Grajales-Muñiz; Consorcio Mexicano de Vigilancia Genómica (CoViGen-Mex). Authors (in alphabetical order): Julio Elias Alvarado-Yaah; Cristóbal Chaidez-Quiroz; Daniel Fregoso-Rueda; Daniel Lira Morales; Eduardo Becerril-Vargas; Fernando Fontove-Herrera; Fidencio Mejía-Nepomuceno; Francisco Pulido; Gloria Elena Espinosa-Ayala; Gloria María Molina-Salinas; Gloria Vazquez; Hector Esteban Paz-Juárez; Hector Montoya-Fuentes; Helen Haydee Fernanda Ramirez-Plascencia; Irvin González-Lopez; Jean Pierre Gonzalez; Jesus Hernandez; Joel Armando Vázquez-Pérez.; Jorge Salas-Hernández; Jose Antonio Enciso-Moreno; Jose Arturo Martinez-Orozco; Jose Esteban Muñoz-Medina; Jose de Jesus Nuñez-Contreras; Juan Bautista Chale-Dzul; Julissa Enciso-Ibarra; Luis Alberto Ochoa-Carrera; Margarita Matias-Florentino; María Guadalupe Santiago-Mauricio; María Guadalupe de Jesús Mireles-Rivera; Mario Mujica-Sánchez; Marissa Perez-García; Nelly Selém-Mojica; Pavel Isa; Ricardo Ciria Merce; Ricardo Grande; Rosa María Gutierrez Rios; Santiago avila-Rios; Selene Zarate; Susana Lopez; Veronica Mata-Haro; Victor Eduardo Garcia-Arias; Victor Hugo Borja-Aburto                                                                                                                                                                                           |                                                                                                                            |
| EPI_ISL_4560891, EPI_ISL_4560893, EPI_ISL_4561014, EPI_ISL_4561016, EPI_ISL_4561018, EPI_ISL_4561020, EPI_ISL_4561022, EPI_ISL_4561023                                                                                                                                                                                                                              | see above                                                                                                                                                                  | Centro de Investigación Biomedica de La Rioja - Hospital San Pedro Logroño                                             | SeqCOVID-SPAIN consortium/IBV(CSIC)                                                                                                                                                                                                                                                                                                                                                                                                                                                                                                                                                                                                                                                                                                                                                                                                                                                                                                                                                                                                                                                                                                                                                                                                                                                                                                                                                                                                                                                                                                                                                                                                                                                                                                                                                 | José Manuel Azcona Gutiérrez; María Pilar Bea Escudero; María de Toro; Miriam Blasco Alberdi and SeqCOVID-SPAIN consortium |
| EPI_ISL_3155486,<br>EPI_ISL_3155488,<br>EPI_ISL_3557194,<br>EPI_ISL_4299725                                                                                                                                                                                                                                                                                         | Centro de Investigación Biomedica de Occidente (CIBO)                                                                                                                      | Centro de Investigación en Enfermedades Infecciosas (CIENI), Instituto Nacional de Enfermedades Respiratorias (INER)   | ; Alejandra García-Gasca; Alejandra Hernández-Teran; Alejandro Sánchez-Flores; Alfredo Herrera-Estrella; Alicia Ocaña-Mondragón; Andreu Comas-García; Angel Gustavo Salas-Lais; Antonio Loza Román; Bernardo Martínez-Miguel; Blanca Taboada; Brenda Irasema Maldonado-Meza; Bruno Gómez-Gil; Carla Ivón Herrera-Najera; Carlos F. Arias; Celia Boukadida; Clara Esperanza Santacruz-Tinoco; Concepción Grajales-Muñiz; Consorcio Mexicano de Vigilancia Genómica (CoViGen-Mex). Authors (in alphabetical order): Julio Elias Alvarado-Yaah; Cristóbal Chaidez-Quiróz; Célida Duque Molina; Celida Martinez- Rodriguez; Célida Martinez-Rodríguez; Daniel Fregoso-Rueda; Daniel Lira Morales; Eduardo Becerril-Vargas; Eduardo Rivera-Martínez; Fernando Fontove-Herrera; Fidencio Mejía-Nepomuceno; Francisco Pulido; Gabriel Chavira-Trujillo; Gloria Elena Espinosa-Ayala; Gloria María Molina-Salinas; Gloria Vazquez; Hector Esteban Paz-Juárez; Hector Montoya-Fuentes; Helen Haydee Fernanda Ramirez-Plascencia; Irvin González-Lopez; Jean Pierre Gonzalez; Jesus Hernandez; Joel Armando Vázquez-Pérez.; Jorge Salas-Hernández; Jose Antonio Enciso-Moreno; Jose Arturo Martinez-Orozco; Jose Esteban Muñoz-Medina; Jose de Jesus Nuñez-Contreras; Juan Bautista Chale-Dzul; Julissa Enciso-Ibarra; Kathia Elizabeth Tapia-Diaz; Luis Alberto Ochoa-Carrera; Margarita Matias-Florentino; Mario Mujica-Sánchez; Marissa Perez-García; María Eugenia Jiménez-Corona; María Guadalupe Santiago-Mauricio; María Guadalupe de Jesús Mireles-Rivera; Nelly Selém-Mojica; Pavel Isa; Ricardo Ciria Merce; Ricardo Grande; Rosa María Gutierrez Rios; Santiago Avila-Rios; Selene Zarate; Susana Lopez; Veronica Mata-Haro; Victor Eduardo Garcia-Arias; Victor Hugo Borja-Aburto |                                                                                                                            |
| EPI_ISL_4006620,<br>EPI_ISL_4006627                                                                                                                                                                                                                                                                                                                                 | Centro de Investigación Biomedica de Occidente (CIBO)                                                                                                                      | Instituto de Biotecnología de la UNAM                                                                                  | ; Alejandra García-Gasca; Alejandra Hernández-Teran; Alejandro Sánchez-Flores; Alfredo Herrera-Estrella; Alicia Ocaña-Mondragón; Andreu Comas-García; Angel Gustavo Salas-Lais; Antonio Loza Román; Bernardo Martínez-Miguel; Blanca Taboada; Brenda Irasema Maldonado-Meza; Bruno Gómez-Gil; Carla Ivón Herrera-Najera; Carlos F. Arias; Celia Boukadida; Clara Esperanza Santacruz-Tinoco; Concepción Grajales-Muñiz; Consorcio Mexicano de Vigilancia Genómica (CoViGen-Mex). Authors (in alphabetical order): Julio Elias Alvarado-Yaah; Cristóbal Chaidez-Quiróz; Célida Duque Molina; Celida Martinez- Rodriguez; Daniel Fregoso-Rueda; Daniel Lira Morales; Eduardo Becerril-Vargas; Fernando Fontove-Herrera; Fidencio Mejía-Nepomuceno; Francisco Pulido; Gloria Elena Espinosa-Ayala; Gloria María Molina-Salinas; Gloria Vazquez; Hector Esteban Paz-Juárez; Hector Montoya-Fuentes; Helen Haydee Fernanda Ramirez-Plascencia; Irvin González-Lopez; Jean Pierre Gonzalez; Jesus Hernandez; Joel Armando Vázquez-Pérez.; Jorge Salas-Hernández; Jose Antonio Enciso-Moreno; Jose Arturo Martinez-Orozco; Jose Esteban Muñoz-Medina; Jose de Jesus Nuñez-Contreras; Juan Bautista Chale-Dzul; Julissa Enciso-Ibarra; Kathia Elizabeth Tapia-Diaz; Luis Alberto Ochoa-Carrera; Margarita Matias-Florentino; Mario Mujica-Sánchez; Marissa Perez-García; María Eugenia Jiménez-Corona; María Guadalupe Santiago-Mauricio; María Guadalupe de Jesús Mireles-Rivera; Nelly Selém-Mojica; Pavel Isa; Ricardo Ciria Merce; Ricardo Grande; Rosa María Gutierrez Rios; Santiago Avila-Rios; Selene Zarate; Susana Lopez; Veronica Mata-Haro; Victor Eduardo Garcia-Arias; Victor Hugo Borja-Aburto                                                                               |                                                                                                                            |
| EPI_ISL_3155402,<br>EPI_ISL_3155409                                                                                                                                                                                                                                                                                                                                 | Centro de Investigación Biomedica del Noreste (CIBIN)                                                                                                                      | Centro de Investigación en Enfermedades Infecciosas (CIENI), Instituto Nacional de Enfermedades Respiratorias (INER)   | ; Alejandra García-Gasca; Alejandra Hernández-Teran; Alejandro Sánchez-Flores; Alfredo Herrera-Estrella; Alicia Ocaña-Mondragón; Andreu Comas-García; Angel Gustavo Salas-Lais; Antonio Loza Román; Bernardo Martínez-Miguel; Blanca Taboada; Brenda Irasema Maldonado-Meza; Bruno Gómez-Gil; Carla Ivón Herrera-Najera; Carlos F. Arias; Celia Boukadida; Clara Esperanza Santacruz-Tinoco; Concepción Grajales-Muñiz; Consorcio Mexicano de Vigilancia Genómica (CoViGen-Mex). Authors (in alphabetical order): Julio Elias Alvarado-Yaah; Cristóbal Chaidez-Quiróz; Célida Duque Molina; Celida Martinez- Rodriguez; Daniel Fregoso-Rueda; Daniel Lira Morales; Eduardo Becerril-Vargas; Fernando Fontove-Herrera; Fidencio Mejía-Nepomuceno; Francisco Pulido; Gloria Elena Espinosa-Ayala; Gloria María Molina-Salinas; Gloria Vazquez; Hector Esteban Paz-Juárez; Hector Montoya-Fuentes; Helen Haydee Fernanda Ramirez-Plascencia; Irvin González-Lopez; Jean Pierre Gonzalez; Jesus Hernandez; Joel Armando Vázquez-Pérez.; Jorge Salas-Hernández; Jose Antonio Enciso-Moreno; Jose Arturo Martinez-Orozco; Jose Esteban Muñoz-Medina; Jose de Jesus Nuñez-Contreras; Juan Bautista Chale-Dzul; Julissa Enciso-Ibarra; Kathia Elizabeth                                                                                                                                                                                                                                                                                                                                                                                                                                                                                                                                     |                                                                                                                            |

|                                                                                                      |                                                                                                                                                                                                                                                                                                                                   |                                                                                                                                                    |                                                                                                                                                                                                                                                                                                                                                                                                                                                                                                                                                                                                                                                                                                                                                                                                                                                                                                                                                                                                                                                                                                                                                                                                                                                                                                                                                                                                                                                                                                                                                                                                                                                                                                      |
|------------------------------------------------------------------------------------------------------|-----------------------------------------------------------------------------------------------------------------------------------------------------------------------------------------------------------------------------------------------------------------------------------------------------------------------------------|----------------------------------------------------------------------------------------------------------------------------------------------------|------------------------------------------------------------------------------------------------------------------------------------------------------------------------------------------------------------------------------------------------------------------------------------------------------------------------------------------------------------------------------------------------------------------------------------------------------------------------------------------------------------------------------------------------------------------------------------------------------------------------------------------------------------------------------------------------------------------------------------------------------------------------------------------------------------------------------------------------------------------------------------------------------------------------------------------------------------------------------------------------------------------------------------------------------------------------------------------------------------------------------------------------------------------------------------------------------------------------------------------------------------------------------------------------------------------------------------------------------------------------------------------------------------------------------------------------------------------------------------------------------------------------------------------------------------------------------------------------------------------------------------------------------------------------------------------------------|
| EPI_ISL_2920231                                                                                      |                                                                                                                                                                                                                                                                                                                                   |                                                                                                                                                    | Tapia-Diaz; Luis Alberto Ochoa-Carrera; Margarita Matías-Florentino; Mario Mújica-Sánchez; Marissa Perez-Garcia; María Guadalupe Santiago-Mauricio; María Guadalupe de Jesús Mireles-Rivera; Nelly Sélem-Mojica; Pavel Isa; Ricardo Ciria Merce; Ricardo Grande; Rosa María Gutiérrez Rios; Santiago Ávila-Ríos; Selene Zárate; Susana Lopez; Verónica Mata-Haro; Víctor Eduardo García-Arias; Víctor Hugo Borja-Aburto                                                                                                                                                                                                                                                                                                                                                                                                                                                                                                                                                                                                                                                                                                                                                                                                                                                                                                                                                                                                                                                                                                                                                                                                                                                                              |
| EPI_ISL_3355560, EPI_ISL_3355562, EPI_ISL_4006308                                                    | Centro de Investigación Biomédica del Noreste (CIBIN)                                                                                                                                                                                                                                                                             | Instituto de Biotecnología de la UNAM                                                                                                              | ; Alejandra García-Gasca; Alejandra Hernández-Terán; Alejandro Sánchez-Flores; Alfredo Herrera-Estrella; Alicia Ocaña-Monragón; Andreu Comas-García; Angel Gustavo Salas-Lais; Antonio Loza Román; Bernardo Martínez-Miguel; Blanca Taboada; Brenda Irasema Maldonado-Meza; Bruno Gómez-Gil; Carla Ivón Herrera-Najera; Carlos F. Arias; Celia Boukaddida; Clara Esperanza Santacruz-Tinoco; Concepción Grajales-Muñiz; Consorcio Mexicano de Vigilancia Genómica (CoVigen-Mex); Authors (in alphabetical order): Julio Elias Alvarado-Yaah; Cristóbal Cháidez-Quirz; Cécilia Duque Molina; Cécilia Martínez Rodríguez; Daniel Fregoso-Rueda; Daniel Lira Morales; Eduardo Becerril-Vargas; Fernando Fontove-Herrera; Fidencio Mejía-Nepomuceno; Francisco Pulido; Gloria Elena Espinosa-Ayala; Gloria María Molina-Salinas; Gloria Vazquez; Hector Esteban Paz-Juárez; Hector Montoya-Fuentes; Helen Haydee Fernanda Ramirez-Plascencia; Irvin González-López; Jean Pierre González; Jesús Hernández; Joel Armando Vázquez-Pérez.; Joel Armando Vázquez-Pérez.; Jorge Salas-Hernández; José Antonio Enciso-Moreno; José Arturo Martínez-Orozco; José Esteban Muñoz-Medina; José de Jesús Nuñez-Contreras; Juan Bautista Chale-Dzul; Julissa Enciso-Ibarra; Kathia Elizabeth Tapia-Diaz; Luis Alberto Ochoa-Carrera; Margarita Matias-Florentino; Mario Mújica-Sánchez; Marissa Perez-Garcia; María Guadalupe Santiago-Mauricio; María Guadalupe de Jesús Mireles-Rivera; Nelly Sélem-Mojica; Pavel Isa; Ricardo Ciria Merce; Ricardo Grande; Rosa María Gutiérrez Rios; Santiago Ávila-Ríos; Selene Zárate; Susana Lopez; Verónica Mata-Haro; Víctor Eduardo García-Arias; Víctor Hugo Borja-Aburto |
| EPI_ISL_1970836, EPI_ISL_1970837                                                                     | Centro de Investigación en Enfermedades Infecciosas (CIENI), Instituto Nacional de Enfermedades Respiratorias (INER)                                                                                                                                                                                                              | Centro de Investigación en Enfermedades Infecciosas (CIENI), Instituto Nacional de Enfermedades Respiratorias (INER)                               | Alejandra Hernández-Terán; Alejandro Sanchez-Flores; Blanca Taboada; Carlos F. Arias; Celia Boukaddida; Eduardo Becerril-Vargas; Fidencio Mejía-Nepomuceno; Francisco Pulido; Gloria Elena Espinosa-Ayala; Gloria María Molina-Salinas; Gloria Vazquez; Hector Esteban Paz-Juárez; Hector Montoya-Fuentes; Helen Haydee Fernanda Ramirez-Plascencia; Irvin González-López; Jean Pierre González; Jesús Hernández; Joel Armando Vázquez-Pérez.; Joel Armando Vázquez-Pérez.; Jorge Salas-Hernández; José Antonio Enciso-Moreno; José Arturo Martínez-Orozco; José Esteban Muñoz-Medina; José de Jesús Nuñez-Contreras; Juan Bautista Chale-Dzul; Julissa Enciso-Ibarra; Kathia Elizabeth Tapia-Diaz; Luis Alberto Ochoa-Carrera; Margarita Matias-Florentino; Mario Mújica-Sánchez; Marissa Perez-Garcia; María Guadalupe Santiago-Mauricio; María Guadalupe de Jesús Mireles-Rivera; Nelly Sélem-Mojica; Pavel Isa; Ricardo Ciria Merce; Ricardo Grande; Rosa María Gutiérrez Rios; Santiago Ávila-Ríos; Selene Zárate; Susana Lopez; Verónica Mata-Haro; Víctor Eduardo García-Arias; Víctor Hugo Borja-Aburto                                                                                                                                                                                                                                                                                                                                                                                                                                                                                                                                                                                      |
| EPI_ISL_4261805                                                                                      | Chiu Laboratory, University of California, San Francisco                                                                                                                                                                                                                                                                          | Chiu Laboratory, University of California, San Francisco                                                                                           | Alicia Sotomayor-Gonzalez; Baolin Wang; Candace Wang; Charles Chiu; Daniel Wong; Dustin Glasner; Venice Servellita; Xianding (Wayne) Deng; Yueyuan Zhang                                                                                                                                                                                                                                                                                                                                                                                                                                                                                                                                                                                                                                                                                                                                                                                                                                                                                                                                                                                                                                                                                                                                                                                                                                                                                                                                                                                                                                                                                                                                             |
| EPI_ISL_5047184, see above                                                                           | EPI_ISL_5047202, EPI_ISL_5047205, EPI_ISL_5047221, EPI_ISL_5047246, EPI_ISL_5858809, EPI_ISL_5858859, EPI_ISL_5858867, EPI_ISL_5858920, EPI_ISL_5858935                                                                                                                                                                           | Christus Sinergia Clinica Farallones                                                                                                               | Universidad del Valle                                                                                                                                                                                                                                                                                                                                                                                                                                                                                                                                                                                                                                                                                                                                                                                                                                                                                                                                                                                                                                                                                                                                                                                                                                                                                                                                                                                                                                                                                                                                                                                                                                                                                |
| EPI_ISL_2920274, EPI_ISL_2920283, EPI_ISL_4056032, EPI_ISL_4520468, EPI_ISL_4927050                  | City of Milwaukee Health Department Laboratory                                                                                                                                                                                                                                                                                    | City of Milwaukee Health Department Laboratory                                                                                                     | Amy Bauer; Jennifer Lentz; Jenny Lentz; Manjeet Khubbar; Nandhukumar Balakrishnan; Nandu Balakrishnan; Samantha Scott; Sanjib Bhattacharyya                                                                                                                                                                                                                                                                                                                                                                                                                                                                                                                                                                                                                                                                                                                                                                                                                                                                                                                                                                                                                                                                                                                                                                                                                                                                                                                                                                                                                                                                                                                                                          |
| EPI_ISL_3242732                                                                                      | Clinica INDISA                                                                                                                                                                                                                                                                                                                    | "Facultad de Ciencias de la Vida, UNAB"                                                                                                            | "Claudio Meneses; Ariel Orellana"; Claudio Olmos; Daniel Leon; Dayan Sanhueza; Eduardo Castro; Gonzalo Campaña; Macarena Bastias; Paola Pidal; Ricardo Yusta; Sebastian Wolter; Susana Saez; Víctor Monreal; Waldo Diaz                                                                                                                                                                                                                                                                                                                                                                                                                                                                                                                                                                                                                                                                                                                                                                                                                                                                                                                                                                                                                                                                                                                                                                                                                                                                                                                                                                                                                                                                              |
| EPI_ISL_5047216, EPI_ISL_5047264                                                                     | Clinica Imbanaco Grupo Quiron Salud                                                                                                                                                                                                                                                                                               | Universidad del Valle                                                                                                                              | Programa Nacional de Caracterización Genómica de SARS-CoV-2                                                                                                                                                                                                                                                                                                                                                                                                                                                                                                                                                                                                                                                                                                                                                                                                                                                                                                                                                                                                                                                                                                                                                                                                                                                                                                                                                                                                                                                                                                                                                                                                                                          |
| EPI_ISL_1820962                                                                                      | Clinica los Nogales                                                                                                                                                                                                                                                                                                               | Instituto Nacional de Salud- Dirección de Investigación en Salud Pública                                                                           | Carlos Franco-Muñoz; Carmen Osorio; Diana Malo; Diego A. Álvarez-Díaz; Diego Andrés Prada; Gerardo Santamaría; Hector Alejandro Ruiz-Moreno; Jhonnatan Reales-González; Jorge Rivera; Juan Camilo Martínez; Julian Naizaque; Katherine Laiton-Donato; Lisseth Pardo; Magdalena Wiesner; Marcela Mercado-Reyes; María T. Herrera-Sepúlveda; Marta Lopez Blanco; Martha Lucia Ospina Martínez; Paola Rojas; Sergio Gomez; Sheryll Corchuelo; Angela Alarcon Cruz                                                                                                                                                                                                                                                                                                                                                                                                                                                                                                                                                                                                                                                                                                                                                                                                                                                                                                                                                                                                                                                                                                                                                                                                                                       |
| EPI_ISL_5656498                                                                                      | Clinical Laboratory, Hospital Infantil de Mexico Federico Gomez.                                                                                                                                                                                                                                                                  | Molecular Pathogenesis Research Laboratory, Hospital Infantil de Mexico Federico Gomez.                                                            | Diaz-Garcia H.; Granados-Riveron J.T.; Moran-Espinosa M.C.; Parra-Ortega I.; Sanchez-Urbina R.                                                                                                                                                                                                                                                                                                                                                                                                                                                                                                                                                                                                                                                                                                                                                                                                                                                                                                                                                                                                                                                                                                                                                                                                                                                                                                                                                                                                                                                                                                                                                                                                       |
| EPI_ISL_2380818, EPI_ISL_3231450                                                                     | Clinical Molecular Microbiology Laboratory, UNC Hospitals                                                                                                                                                                                                                                                                         | Jeremy Wang                                                                                                                                        | Alexander Rubinsteyn; Colleen Rice; Corbin Jones; Jason Smedberg; Jeremy Wang; Melissa Miller; Robert Hagan; Shawn Hawken                                                                                                                                                                                                                                                                                                                                                                                                                                                                                                                                                                                                                                                                                                                                                                                                                                                                                                                                                                                                                                                                                                                                                                                                                                                                                                                                                                                                                                                                                                                                                                            |
| EPI_ISL_5779882                                                                                      | Clinique Saint-Pierre Ottignies                                                                                                                                                                                                                                                                                                   | UCLouvain/IREC/MBLG                                                                                                                                | Benoit Kabamba Mukadi; Bertrand Bearzatto; Jean Ruelle                                                                                                                                                                                                                                                                                                                                                                                                                                                                                                                                                                                                                                                                                                                                                                                                                                                                                                                                                                                                                                                                                                                                                                                                                                                                                                                                                                                                                                                                                                                                                                                                                                               |
| EPI_ISL_2434137, EPI_ISL_2927083, EPI_ISL_2966323                                                    | Cliniques universitaires Saint-Luc                                                                                                                                                                                                                                                                                                | UCLouvain/IREC/MBLG                                                                                                                                | Benoit Kabamba Mukadi; Bertrand Bearzatto; Jean Ruelle; Ophélie Simon                                                                                                                                                                                                                                                                                                                                                                                                                                                                                                                                                                                                                                                                                                                                                                                                                                                                                                                                                                                                                                                                                                                                                                                                                                                                                                                                                                                                                                                                                                                                                                                                                                |
| EPI_ISL_6442175, EPI_ISL_6442180                                                                     | Clinica Sebastián de Belcazar                                                                                                                                                                                                                                                                                                     | "Laboratorio de biotecnología, Universidad Icesi"                                                                                                  | Adrián Camilo Rodríguez Ararat; Diana M. Florez Giraldo; Marcela Mercado; María F. Villegas Torres; María I. Gutiérrez López; Paola A. Caicedo Burbano; Programa Nacional de Caracterización Genómica de SARS-CoV-2; Sara González Henao                                                                                                                                                                                                                                                                                                                                                                                                                                                                                                                                                                                                                                                                                                                                                                                                                                                                                                                                                                                                                                                                                                                                                                                                                                                                                                                                                                                                                                                             |
| EPI_ISL_5146263, EPI_ISL_5146264                                                                     | Clinica Sebastián de Belcazar - Valle del Cauca                                                                                                                                                                                                                                                                                   | Laboratorio de Biología Molecular y Biotecnología - Universidad Tecnológica de Pereira                                                             | Augusto Zuluaga-Velez; Fredy A. Tabares-Villa; Juan C. Sepulveda; Juan D. Anacona-Montilla; Marcela Orjuela-Rodriguez                                                                                                                                                                                                                                                                                                                                                                                                                                                                                                                                                                                                                                                                                                                                                                                                                                                                                                                                                                                                                                                                                                                                                                                                                                                                                                                                                                                                                                                                                                                                                                                |
| EPI_ISL_6442183                                                                                      | Clinica de Occidente                                                                                                                                                                                                                                                                                                              | "Laboratorio de biotecnología, Universidad Icesi"                                                                                                  | Adrián Camilo Rodríguez Ararat; Diana M. Florez Giraldo; Marcela Mercado; María F. Villegas Torres; María I. Gutiérrez López; Paola A. Caicedo Burbano; Programa Nacional de Caracterización Genómica de SARS-CoV-2; Sara González Henao                                                                                                                                                                                                                                                                                                                                                                                                                                                                                                                                                                                                                                                                                                                                                                                                                                                                                                                                                                                                                                                                                                                                                                                                                                                                                                                                                                                                                                                             |
| EPI_ISL_4300679, EPI_ISL_4300680                                                                     | Color Genomics                                                                                                                                                                                                                                                                                                                    | Chiu Laboratory, University of California, San Francisco                                                                                           | Alicia Sotomayor-Gonzalez; Alicia Zhou; Baolin Wang; Charles Chiu; Daniel Wong; Erika Torres; Madyson Wanner; Noah Brazer; Scott Topper; Venice Servellita; Yueyuan Zhang                                                                                                                                                                                                                                                                                                                                                                                                                                                                                                                                                                                                                                                                                                                                                                                                                                                                                                                                                                                                                                                                                                                                                                                                                                                                                                                                                                                                                                                                                                                            |
| EPI_ISL_2309975, see above                                                                           | EPI_ISL_2310477, EPI_ISL_3159546, EPI_ISL_3631647, EPI_ISL_3631648, EPI_ISL_3631649, EPI_ISL_3631650, EPI_ISL_3631651, EPI_ISL_3757943, EPI_ISL_3757945, EPI_ISL_3757947, EPI_ISL_4035879, EPI_ISL_4035880, EPI_ISL_4197802, EPI_ISL_4197803, EPI_ISL_4197804, EPI_ISL_4206979, EPI_ISL_4348492, EPI_ISL_4441950, EPI_ISL_4442169 | Colorado Department of Public Health and Environment                                                                                               | Colorado Department of Public Health and Environment                                                                                                                                                                                                                                                                                                                                                                                                                                                                                                                                                                                                                                                                                                                                                                                                                                                                                                                                                                                                                                                                                                                                                                                                                                                                                                                                                                                                                                                                                                                                                                                                                                                 |
| EPI_ISL_5603745, see above                                                                           | EPI_ISL_5603746, EPI_ISL_5603747, EPI_ISL_5603748, EPI_ISL_5603749, EPI_ISL_5603750, EPI_ISL_5603751, EPI_ISL_5603752, EPI_ISL_5603753, EPI_ISL_5603754, EPI_ISL_5603755                                                                                                                                                          | Compensar Calle 26                                                                                                                                 | LSPSDS                                                                                                                                                                                                                                                                                                                                                                                                                                                                                                                                                                                                                                                                                                                                                                                                                                                                                                                                                                                                                                                                                                                                                                                                                                                                                                                                                                                                                                                                                                                                                                                                                                                                                               |
| EPI_ISL_4417562, EPI_ISL_4417582, EPI_ISL_4417583, EPI_ISL_4417584, EPI_ISL_4417613, EPI_ISL_4417618 | Compensar Calle 63                                                                                                                                                                                                                                                                                                                | Centro de Investigaciones en Microbiología y Biotecnología-UR (CIMBIUR), Facultad de Ciencias Naturales, Universidad del Rosario, Bogotá, Colombia | Alejandro Gomez Lopez; Gabriela Delgado Murcia; Johana Hernandez Toloza; Marcela Castano Rodriguez; Marcela Mercado                                                                                                                                                                                                                                                                                                                                                                                                                                                                                                                                                                                                                                                                                                                                                                                                                                                                                                                                                                                                                                                                                                                                                                                                                                                                                                                                                                                                                                                                                                                                                                                  |
| EPI_ISL_2784059, EPI_ISL_3273563                                                                     | Curative Labs                                                                                                                                                                                                                                                                                                                     | Curative Labs                                                                                                                                      | Angie Ramirez; Juan David Ramirez; Luz H. Patiño; Marcela Mercado-Reyes; Marina Muñoz; Nathalia Ballesteros; Nicolas Niño; Sergio Castañeda                                                                                                                                                                                                                                                                                                                                                                                                                                                                                                                                                                                                                                                                                                                                                                                                                                                                                                                                                                                                                                                                                                                                                                                                                                                                                                                                                                                                                                                                                                                                                          |
| EPI_ISL_3086155, EPI_ISL_3086156                                                                     | Curative Labs                                                                                                                                                                                                                                                                                                                     | New Mexico Department of Health Scientific Laboratory                                                                                              | Elias L. Salfati; Eugenia Khorosheva; George Way; J.Cesar Ignacio-Espinoza; Janet Chen; Mikhail Hanewich-Hollatz; Nabjot Sandhu; Sophia Quasem; Vladimir Slepnev; Zhiyi Xie                                                                                                                                                                                                                                                                                                                                                                                                                                                                                                                                                                                                                                                                                                                                                                                                                                                                                                                                                                                                                                                                                                                                                                                                                                                                                                                                                                                                                                                                                                                          |
| EPI_ISL_3305780                                                                                      | DC Public Health Lab/ Dept. of Forensic Sciences                                                                                                                                                                                                                                                                                  | Centers for Disease Control and Prevention Division of Viral Diseases, Pathogen Discovery                                                          | Anastacia Griego-Fisher; D'eldra Malone; Ellie Johnson; Jennifer Benoit; Linda Salazar; Ratheesh Rajan                                                                                                                                                                                                                                                                                                                                                                                                                                                                                                                                                                                                                                                                                                                                                                                                                                                                                                                                                                                                                                                                                                                                                                                                                                                                                                                                                                                                                                                                                                                                                                                               |
| EPI_ISL_2833919, EPI_ISL_2885962, EPI_ISL_3031434                                                    | DC Public Health Lab/ Dept. of Forensic Sciences                                                                                                                                                                                                                                                                                  | DC Public Health Lab/ Dept. of Forensic Sciences                                                                                                   | Alex Burgin; Ben L. Rambo-Martin; Clinton R. Paden; Dakota Howard; Dave Wentworth; Dhvani Batra; Jasmine Padilla; Justin Lee; Krista Queen; Kristen Knipe; Kristine Lacek; Mark Burroughs; Matthew Schmerer; Meghan Bentz; Mili Sheth; Peter Cook; Sam Shepard; Sarah Nobles; Suxiang Tong; Vivien Dugan; Yvette Unoarumhi                                                                                                                                                                                                                                                                                                                                                                                                                                                                                                                                                                                                                                                                                                                                                                                                                                                                                                                                                                                                                                                                                                                                                                                                                                                                                                                                                                           |
| EPI_ISL_4945175                                                                                      | DOHMH Chelsea                                                                                                                                                                                                                                                                                                                     | New York City Public Health Laboratory                                                                                                             | Brittany Hamilton; Connie Maza; David Payne; Elizabeth Zelaya; Janis Doss; Jocelyn Hauser; Monica Mann; Sarah Scott; Scott Nguyen                                                                                                                                                                                                                                                                                                                                                                                                                                                                                                                                                                                                                                                                                                                                                                                                                                                                                                                                                                                                                                                                                                                                                                                                                                                                                                                                                                                                                                                                                                                                                                    |
| EPI_ISL_3216473                                                                                      | DOHMH Jamaica                                                                                                                                                                                                                                                                                                                     | New York City Public Health Laboratory                                                                                                             | Jade Wang; et al.                                                                                                                                                                                                                                                                                                                                                                                                                                                                                                                                                                                                                                                                                                                                                                                                                                                                                                                                                                                                                                                                                                                                                                                                                                                                                                                                                                                                                                                                                                                                                                                                                                                                                    |
| EPI_ISL_3216418                                                                                      | DOHMH PHL                                                                                                                                                                                                                                                                                                                         | New York City Public Health Laboratory                                                                                                             | Jade Wang; et al.                                                                                                                                                                                                                                                                                                                                                                                                                                                                                                                                                                                                                                                                                                                                                                                                                                                                                                                                                                                                                                                                                                                                                                                                                                                                                                                                                                                                                                                                                                                                                                                                                                                                                    |
| EPI_ISL_5621761                                                                                      | DPHL                                                                                                                                                                                                                                                                                                                              | Delaware Public Health Lab                                                                                                                         | Jade Wang; et al.<br>Rebecca Savage                                                                                                                                                                                                                                                                                                                                                                                                                                                                                                                                                                                                                                                                                                                                                                                                                                                                                                                                                                                                                                                                                                                                                                                                                                                                                                                                                                                                                                                                                                                                                                                                                                                                  |
| EPI_ISL_1678824                                                                                      | Department of Medical Microbiology & Infection prevention, Amsterdam University Medical Centers location AMC                                                                                                                                                                                                                      | Department of Medical Microbiology & Infection prevention, Amsterdam University Medical Centers location AMC                                       | Fokla Zorgdrager; Janke Schinkel; Marcel Jonges; Matthijs Welkers; Menne de Jong; Robin van Houdt; Sebastien Matamoros; Sjoerd Rebers                                                                                                                                                                                                                                                                                                                                                                                                                                                                                                                                                                                                                                                                                                                                                                                                                                                                                                                                                                                                                                                                                                                                                                                                                                                                                                                                                                                                                                                                                                                                                                |
| EPI_ISL_3000660, EPI_ISL_3000662, EPI_ISL_3000667                                                    | Department of Pathology, University of Cambridge                                                                                                                                                                                                                                                                                  | COVID-19 Genomics UK (COG-UK) Consortium                                                                                                           | Aminu S. Jahun; Ian Goodfellow; Iliana Georgana; Martin D. Curran; Myra Hosmillo; Rhys Izuagbe; Surendra Parmar; William L. Hamilton; Yasmin Chaudhry                                                                                                                                                                                                                                                                                                                                                                                                                                                                                                                                                                                                                                                                                                                                                                                                                                                                                                                                                                                                                                                                                                                                                                                                                                                                                                                                                                                                                                                                                                                                                |
| EPI_ISL_3266210                                                                                      | Department of Public Health Sibiu                                                                                                                                                                                                                                                                                                 | National Institute of Infectious Diseases-Prof. Dr. Matei Bals Molecular Diagnostics Laboratory                                                    | Corina Casangiu; Dan Otelea; Leontina Banica; Marius Surleac; Ovidiu Vlaicu; Petre Milu; Robert Hohan; Simona Paraschiv                                                                                                                                                                                                                                                                                                                                                                                                                                                                                                                                                                                                                                                                                                                                                                                                                                                                                                                                                                                                                                                                                                                                                                                                                                                                                                                                                                                                                                                                                                                                                                              |
| EPI_ISL_1868200, EPI_ISL_1890559, EPI_ISL_2296939, EPI_ISL_2298986                                   | Department of Virus and Microbiological Special Diagnostics, Statens Serum Institut, Copenhagen, Denmark                                                                                                                                                                                                                          | Aalborg University                                                                                                                                 | Danish Covid-19 Genome Consortium                                                                                                                                                                                                                                                                                                                                                                                                                                                                                                                                                                                                                                                                                                                                                                                                                                                                                                                                                                                                                                                                                                                                                                                                                                                                                                                                                                                                                                                                                                                                                                                                                                                                    |
| EPI_ISL_2955372                                                                                      | Dianalabs SA                                                                                                                                                                                                                                                                                                                      | Genesupport                                                                                                                                        | Geraldine Jost; Katia Jatón; Nadia Liassine; Tanguy ARAUD                                                                                                                                                                                                                                                                                                                                                                                                                                                                                                                                                                                                                                                                                                                                                                                                                                                                                                                                                                                                                                                                                                                                                                                                                                                                                                                                                                                                                                                                                                                                                                                                                                            |
| EPI_ISL_2613602, see above                                                                           | EPI_ISL_2613603, EPI_ISL_2613604, EPI_ISL_2613605, EPI_ISL_2613606, EPI_ISL_2613607, EPI_ISL_2613608, EPI_ISL_2613609, EPI_ISL_2613610, EPI_ISL_2613611, EPI_ISL_2966247, EPI_ISL_3152109, EPI_ISL_3298383                                                                                                                        | Dipartimento di Medicina di Laboratorio, Azienda                                                                                                   | Catia Mio; Chiara Dal Secco; Corrado Pipan; Francesco Curcio; Stefania Marzintotto                                                                                                                                                                                                                                                                                                                                                                                                                                                                                                                                                                                                                                                                                                                                                                                                                                                                                                                                                                                                                                                                                                                                                                                                                                                                                                                                                                                                                                                                                                                                                                                                                   |





|                                                                                                                                                                                                                                                                                                                                                                                                                                                                                                                                                                                                                                                                                                                                                                                                                                                                                                                                                                                                                                                                                                                                                                                                                                                                                                                                                                                                                                                                                                                                                                                                                                                                                                                                                                                                                                                                                                                                                                                                                                                                                                                                                                                                                                                                                                                                                                                                                                                                                                                                                                                                                                                    |                                                            | Salud                                                                                                                    |                                                                                                                                                                                                                                                                                                                                                                                                                                                                                                                                                                                                                                                                                                                     |  |  |
|----------------------------------------------------------------------------------------------------------------------------------------------------------------------------------------------------------------------------------------------------------------------------------------------------------------------------------------------------------------------------------------------------------------------------------------------------------------------------------------------------------------------------------------------------------------------------------------------------------------------------------------------------------------------------------------------------------------------------------------------------------------------------------------------------------------------------------------------------------------------------------------------------------------------------------------------------------------------------------------------------------------------------------------------------------------------------------------------------------------------------------------------------------------------------------------------------------------------------------------------------------------------------------------------------------------------------------------------------------------------------------------------------------------------------------------------------------------------------------------------------------------------------------------------------------------------------------------------------------------------------------------------------------------------------------------------------------------------------------------------------------------------------------------------------------------------------------------------------------------------------------------------------------------------------------------------------------------------------------------------------------------------------------------------------------------------------------------------------------------------------------------------------------------------------------------------------------------------------------------------------------------------------------------------------------------------------------------------------------------------------------------------------------------------------------------------------------------------------------------------------------------------------------------------------------------------------------------------------------------------------------------------------|------------------------------------------------------------|--------------------------------------------------------------------------------------------------------------------------|---------------------------------------------------------------------------------------------------------------------------------------------------------------------------------------------------------------------------------------------------------------------------------------------------------------------------------------------------------------------------------------------------------------------------------------------------------------------------------------------------------------------------------------------------------------------------------------------------------------------------------------------------------------------------------------------------------------------|--|--|
| EPI_ISL_2674344                                                                                                                                                                                                                                                                                                                                                                                                                                                                                                                                                                                                                                                                                                                                                                                                                                                                                                                                                                                                                                                                                                                                                                                                                                                                                                                                                                                                                                                                                                                                                                                                                                                                                                                                                                                                                                                                                                                                                                                                                                                                                                                                                                                                                                                                                                                                                                                                                                                                                                                                                                                                                                    | HOSPITAL PEDRO LEON ALVAREZ DIAZ                           | Instituto Nacional de Salud- Dirección de Investigación en Salud Pública                                                 | Carlos Franco-Muñoz; Carmen Osorio; Diana Malo; Diego A. Álvarez-Díaz; Diego Andrés Prada; Gerardo Santamaría; Hector Alejandro Ruiz-Moreno; Jhonnatan Reales-González; Jorge Rivera; Juan Camilo Martínez; Julian Naizaque; Katherine Laiton-Donato; Lisseth Pardo; Magdalena Wiesner; Marcela Mercado-Reyes; María T. Herrera-Sepúlveda; Marta Lopez Blanco; Martha Lucia Ospina Martínez; Paola Rojas; Sergio Gomez; Sheryll Corchuelo; Ángela Alarcon Cruz                                                                                                                                                                                                                                                      |  |  |
| EPI_ISL_2674346, EPI_ISL_2674348                                                                                                                                                                                                                                                                                                                                                                                                                                                                                                                                                                                                                                                                                                                                                                                                                                                                                                                                                                                                                                                                                                                                                                                                                                                                                                                                                                                                                                                                                                                                                                                                                                                                                                                                                                                                                                                                                                                                                                                                                                                                                                                                                                                                                                                                                                                                                                                                                                                                                                                                                                                                                   | HOSPITAL REGIONAL DE LA ORINOQUIA                          | Instituto Nacional de Salud- Dirección de Investigación en Salud Pública                                                 | Carlos Franco-Muñoz; Carmen Osorio; Diana Malo; Diego A. Álvarez-Díaz; Diego Andrés Prada; Gerardo Santamaría; Hector Alejandro Ruiz-Moreno; Jhonnatan Reales-González; Jorge Rivera; Juan Camilo Martínez; Julian Naizaque; Katherine Laiton-Donato; Lisseth Pardo; Magdalena Wiesner; Marcela Mercado-Reyes; María T. Herrera-Sepúlveda; Marta Lopez Blanco; Martha Lucia Ospina Martínez; Paola Rojas; Sergio Gomez; Sheryll Corchuelo; Ángela Alarcon Cruz                                                                                                                                                                                                                                                      |  |  |
| EPI_ISL_2674347                                                                                                                                                                                                                                                                                                                                                                                                                                                                                                                                                                                                                                                                                                                                                                                                                                                                                                                                                                                                                                                                                                                                                                                                                                                                                                                                                                                                                                                                                                                                                                                                                                                                                                                                                                                                                                                                                                                                                                                                                                                                                                                                                                                                                                                                                                                                                                                                                                                                                                                                                                                                                                    | HOSPITAL REGIONAL ORINOQUIA                                | Instituto Nacional de Salud- Dirección de Investigación en Salud Pública                                                 | Carlos Franco-Muñoz; Carmen Osorio; Diana Malo; Diego A. Álvarez-Díaz; Diego Andrés Prada; Gerardo Santamaría; Hector Alejandro Ruiz-Moreno; Jhonnatan Reales-González; Jorge Rivera; Juan Camilo Martínez; Julian Naizaque; Katherine Laiton-Donato; Lisseth Pardo; Magdalena Wiesner; Marcela Mercado-Reyes; María T. Herrera-Sepúlveda; Marta Lopez Blanco; Martha Lucia Ospina Martínez; Paola Rojas; Sergio Gomez; Sheryll Corchuelo; Ángela Alarcon Cruz                                                                                                                                                                                                                                                      |  |  |
| EPI_ISL_3274358, EPI_ISL_3274359, EPI_ISL_3298342                                                                                                                                                                                                                                                                                                                                                                                                                                                                                                                                                                                                                                                                                                                                                                                                                                                                                                                                                                                                                                                                                                                                                                                                                                                                                                                                                                                                                                                                                                                                                                                                                                                                                                                                                                                                                                                                                                                                                                                                                                                                                                                                                                                                                                                                                                                                                                                                                                                                                                                                                                                                  | HOSPITAL SAN FRANCISCO DE ASIS                             | Incienza, Instituto Costarricense de Investigación y Enseñanza en Nutrición y Salud                                      | Adriana Godínez; Caterina Guzmán; Claudio Soto-Garita; Estela Cordero; Francisco Duarte; Hebleen Porras; Joselyn Prado & Adrián Fallas; José Luis Vargas; Mariela Gutiérrez; Mariela Gutiérrez Joselyn Prado; Melany Calderón; Nazareth Ruiz & Adrian Fallas Mora                                                                                                                                                                                                                                                                                                                                                                                                                                                   |  |  |
| EPI_ISL_3274366                                                                                                                                                                                                                                                                                                                                                                                                                                                                                                                                                                                                                                                                                                                                                                                                                                                                                                                                                                                                                                                                                                                                                                                                                                                                                                                                                                                                                                                                                                                                                                                                                                                                                                                                                                                                                                                                                                                                                                                                                                                                                                                                                                                                                                                                                                                                                                                                                                                                                                                                                                                                                                    | HOSPITAL SAN RAFAEL DE ALAJUELA [ALAJUELA/ALAJUELA]        | Incienza, Instituto Costarricense de Investigación y Enseñanza en Nutrición y Salud                                      | & Nazareth Ruiz; Adriana Godínez; Caterina Guzmán; Claudio Soto-Garita; Estela Cordero; Francisco Duarte; Hebleen Porras; José Luis Vargas; Mariela Gutiérrez Joselyn Prado; Melany Calderón                                                                                                                                                                                                                                                                                                                                                                                                                                                                                                                        |  |  |
| EPI_ISL_3948525                                                                                                                                                                                                                                                                                                                                                                                                                                                                                                                                                                                                                                                                                                                                                                                                                                                                                                                                                                                                                                                                                                                                                                                                                                                                                                                                                                                                                                                                                                                                                                                                                                                                                                                                                                                                                                                                                                                                                                                                                                                                                                                                                                                                                                                                                                                                                                                                                                                                                                                                                                                                                                    | HOSPITAL SAN VICENTE DE PAUL                               | Incienza, Instituto Costarricense de Investigación y Enseñanza en Nutrición y Salud                                      | Adriana Godínez; Claudio Soto-Garita; Estela Cordero; Francisco Duarte; Hebleen Porras; Joselyn Prado & Silvia Sáenz; José Luis Vargas; Mariela Gutiérrez; Melany Calderón                                                                                                                                                                                                                                                                                                                                                                                                                                                                                                                                          |  |  |
| EPI_ISL_3948537                                                                                                                                                                                                                                                                                                                                                                                                                                                                                                                                                                                                                                                                                                                                                                                                                                                                                                                                                                                                                                                                                                                                                                                                                                                                                                                                                                                                                                                                                                                                                                                                                                                                                                                                                                                                                                                                                                                                                                                                                                                                                                                                                                                                                                                                                                                                                                                                                                                                                                                                                                                                                                    | HOSPITAL SAN VITO DE COTO BRUS                             | Incienza, Instituto Costarricense de Investigación y Enseñanza en Nutrición y Salud                                      | Adriana Godínez; Claudio Soto-Garita; Estela Cordero; Francisco Duarte; Hebleen Porras; Joselyn Prado & María Fernanda Matamoros; José Luis Vargas; Mariela Gutiérrez; Melany Calderón                                                                                                                                                                                                                                                                                                                                                                                                                                                                                                                              |  |  |
| EPI_ISL_3502571, see above                                                                                                                                                                                                                                                                                                                                                                                                                                                                                                                                                                                                                                                                                                                                                                                                                                                                                                                                                                                                                                                                                                                                                                                                                                                                                                                                                                                                                                                                                                                                                                                                                                                                                                                                                                                                                                                                                                                                                                                                                                                                                                                                                                                                                                                                                                                                                                                                                                                                                                                                                                                                                         | HOSPITAL UNIVERSITARIO 12 DE OCTUBRE                       | HOSPITAL UNIVERSITARIO 12 DE OCTUBRE                                                                                     | Carmen Martín-Higuera; Esther Viedma; Irene Muñoz-Gallego; M.ª Dolores Folgueira; Mar Aguilera; Noelia Moral; Rafael Delgado; Sagrario Zurita                                                                                                                                                                                                                                                                                                                                                                                                                                                                                                                                                                       |  |  |
| EPI_ISL_3834651, EPI_ISL_3834652, EPI_ISL_4193925, EPI_ISL_4193955, EPI_ISL_4193956, EPI_ISL_5886781                                                                                                                                                                                                                                                                                                                                                                                                                                                                                                                                                                                                                                                                                                                                                                                                                                                                                                                                                                                                                                                                                                                                                                                                                                                                                                                                                                                                                                                                                                                                                                                                                                                                                                                                                                                                                                                                                                                                                                                                                                                                                                                                                                                                                                                                                                                                                                                                                                                                                                                                               | HOSPITAL UNIVERSITARIO CENTRAL DE ASTURIAS                 | Laboratorio de Virología HUCA                                                                                            | ; Alba L; Alvarez-Arguelles ME; Boga JA; Costales I; Coto E; González-Alba JM; Gómez de Oña J; Martín-Rodríguez G; Melón S; Perez-Martínez Z; Rojo S; Sandoval M                                                                                                                                                                                                                                                                                                                                                                                                                                                                                                                                                    |  |  |
| EPI_ISL_4601264                                                                                                                                                                                                                                                                                                                                                                                                                                                                                                                                                                                                                                                                                                                                                                                                                                                                                                                                                                                                                                                                                                                                                                                                                                                                                                                                                                                                                                                                                                                                                                                                                                                                                                                                                                                                                                                                                                                                                                                                                                                                                                                                                                                                                                                                                                                                                                                                                                                                                                                                                                                                                                    | HOSPITAL UNIVERSITARIO DE CEUTA                            | Instituto de Salud Carlos III                                                                                            | A. Monzón; F. Casas; I. HIJANO VILLEGAS; I. Jiménez; M. Camarero; P. Zaballos; S. Cuesta; S. Iglesias-Caballero; S. Pozo; S. Varona; SALÓME; Sandonís; V. Vázquez-Morón                                                                                                                                                                                                                                                                                                                                                                                                                                                                                                                                             |  |  |
| EPI_ISL_3459404, EPI_ISL_3462744                                                                                                                                                                                                                                                                                                                                                                                                                                                                                                                                                                                                                                                                                                                                                                                                                                                                                                                                                                                                                                                                                                                                                                                                                                                                                                                                                                                                                                                                                                                                                                                                                                                                                                                                                                                                                                                                                                                                                                                                                                                                                                                                                                                                                                                                                                                                                                                                                                                                                                                                                                                                                   | HOSPITAL UNIVERSITARIO HERNANDO MONCALEANO PERDOMO (HUHMP) | Instituto Nacional de Salud                                                                                              | Carlos Franco-Muñoz; Carmen Osorio; Diana Malo; Diego A. Álvarez-Díaz; Diego Andrés Prada; Gerardo Santamaría; Hector Alejandro Ruiz-Moreno; Jhonnatan Reales-González; Jorge Rivera; Juan Camilo Martínez; Julian Naizaque; Katherine Laiton-Donato; Lisseth Pardo; Magdalena Wiesner; Marcela Mercado-Reyes; María T. Herrera-Sepúlveda; Marta Lopez Blanco; Martha Lucia Ospina Martínez; Paola Rojas; Sergio Gomez; Sheryll Corchuelo; Ángela Alarcon Cruz                                                                                                                                                                                                                                                      |  |  |
| EPI_ISL_3221251                                                                                                                                                                                                                                                                                                                                                                                                                                                                                                                                                                                                                                                                                                                                                                                                                                                                                                                                                                                                                                                                                                                                                                                                                                                                                                                                                                                                                                                                                                                                                                                                                                                                                                                                                                                                                                                                                                                                                                                                                                                                                                                                                                                                                                                                                                                                                                                                                                                                                                                                                                                                                                    | HOSPITAL UNIVERSITARIO SON ESPASES                         | HOSPITAL UNIVERSITARIO SON ESPASES                                                                                       | Dr. Antonio Oliver; Dr. Carla López-Causapé; Dr. Gabriel Cabot; Hospital Universitario Son Espases; on behalf of Servicio de Microbiología                                                                                                                                                                                                                                                                                                                                                                                                                                                                                                                                                                          |  |  |
| EPI_ISL_2178393, see above                                                                                                                                                                                                                                                                                                                                                                                                                                                                                                                                                                                                                                                                                                                                                                                                                                                                                                                                                                                                                                                                                                                                                                                                                                                                                                                                                                                                                                                                                                                                                                                                                                                                                                                                                                                                                                                                                                                                                                                                                                                                                                                                                                                                                                                                                                                                                                                                                                                                                                                                                                                                                         | HOSPITAL UNIVERSITARIO VIRGEN DE LA ARRIXACA               | Instituto de Salud Carlos III                                                                                            | A. Monzón; ANTONIO; F. Casas; J. Jiménez; I. MORENO DOCON; I. MORENO PARRADO; I. MORENO PARRADO; Iglesias-Caballero; LAURA; M. Camarero; M. Sandonís; P. Zaballos; S. Camarero; S. Cuesta; S. Iglesias-Caballero; S. Pozo; S. Varona; Sandonís; V. Camarero; V. Vázquez-Morón; Vázquez-Morón                                                                                                                                                                                                                                                                                                                                                                                                                        |  |  |
| EPI_ISL_4258664                                                                                                                                                                                                                                                                                                                                                                                                                                                                                                                                                                                                                                                                                                                                                                                                                                                                                                                                                                                                                                                                                                                                                                                                                                                                                                                                                                                                                                                                                                                                                                                                                                                                                                                                                                                                                                                                                                                                                                                                                                                                                                                                                                                                                                                                                                                                                                                                                                                                                                                                                                                                                                    | HOSPITAL UPALA                                             | Incienza, Instituto Costarricense de Investigación y Enseñanza en Nutrición y Salud                                      | Adriana Godínez; Claudio Soto-Garita; Estela Cordero; Francisco Duarte; Hebleen Porras; Joselyn Prado & Benito Caballero; José Luis Vargas; Mariela Gutiérrez; Melany Calderón                                                                                                                                                                                                                                                                                                                                                                                                                                                                                                                                      |  |  |
| EPI_ISL_4958028, EPI_ISL_4984917, EPI_ISL_4984927, EPI_ISL_4984936, EPI_ISL_6575501, EPI_ISL_6575503                                                                                                                                                                                                                                                                                                                                                                                                                                                                                                                                                                                                                                                                                                                                                                                                                                                                                                                                                                                                                                                                                                                                                                                                                                                                                                                                                                                                                                                                                                                                                                                                                                                                                                                                                                                                                                                                                                                                                                                                                                                                                                                                                                                                                                                                                                                                                                                                                                                                                                                                               | HPTU                                                       | Laboratorio Departamental de Salud Publica de Antioquia                                                                  | Ana Victoria Valencia Duarte; Andres F. Cardona-Rios; Cristian Arbey Velarde Hoyos; Gloria Isabel Escobar; Idabely Betancur Ortiz; Juan P. Hernandez-Ortiz; Juan Pablo Isaza Agudelo; Maria Stella López                                                                                                                                                                                                                                                                                                                                                                                                                                                                                                            |  |  |
| EPI_ISL_2086281, see above                                                                                                                                                                                                                                                                                                                                                                                                                                                                                                                                                                                                                                                                                                                                                                                                                                                                                                                                                                                                                                                                                                                                                                                                                                                                                                                                                                                                                                                                                                                                                                                                                                                                                                                                                                                                                                                                                                                                                                                                                                                                                                                                                                                                                                                                                                                                                                                                                                                                                                                                                                                                                         | Hackensack Medical Center                                  | New York Genome Center                                                                                                   | Amy Baldwin; Andre Corvelo; Barry Kreiswirth; David Perlin; Dayna M. Oschwald; Jose Mediavilla; Kaelea Composto; Kar Chow; Liang Chen; Marcus Cunningham; Michael Zody; Samantha Fennessey; Tom Maniatis                                                                                                                                                                                                                                                                                                                                                                                                                                                                                                            |  |  |
| EPI_ISL_4601972                                                                                                                                                                                                                                                                                                                                                                                                                                                                                                                                                                                                                                                                                                                                                                                                                                                                                                                                                                                                                                                                                                                                                                                                                                                                                                                                                                                                                                                                                                                                                                                                                                                                                                                                                                                                                                                                                                                                                                                                                                                                                                                                                                                                                                                                                                                                                                                                                                                                                                                                                                                                                                    | HealthPartners Central Lab                                 | Minnesota Department of Health, Public Health Laboratory                                                                 | Alexandra Lorentz; Jacob Garfin; Matt Plumb; and Xiong Wang                                                                                                                                                                                                                                                                                                                                                                                                                                                                                                                                                                                                                                                         |  |  |
| EPI_ISL_5144911, EPI_ISL_5144943, EPI_ISL_5144962, EPI_ISL_5144977, EPI_ISL_5145108, EPI_ISL_5145116, EPI_ISL_5145164, EPI_ISL_5145291, EPI_ISL_5145301, EPI_ISL_5145309, EPI_ISL_5145317, EPI_ISL_5145359, EPI_ISL_5145372, EPI_ISL_5145399, EPI_ISL_5145471, EPI_ISL_5145520, EPI_ISL_5145536, EPI_ISL_5145555, EPI_ISL_5145563, EPI_ISL_5145567, EPI_ISL_5145573, EPI_ISL_5203415, EPI_ISL_522122, EPI_ISL_5659018, EPI_ISL_5947562, EPI_ISL_647168, EPI_ISL_6476190, EPI_ISL_6476683, EPI_ISL_6476694, EPI_ISL_6476869, EPI_ISL_6477120, EPI_ISL_6478815, EPI_ISL_6479126, EPI_ISL_6479524, EPI_ISL_6480036, EPI_ISL_6480123, EPI_ISL_6480830, EPI_ISL_6480832, EPI_ISL_6480841, EPI_ISL_6480913, EPI_ISL_6480956, EPI_ISL_6481011, EPI_ISL_6481021, EPI_ISL_6481052, EPI_ISL_6481058, EPI_ISL_6481085, EPI_ISL_6481118, EPI_ISL_6481180, EPI_ISL_6481182, EPI_ISL_6481290, EPI_ISL_6481300, EPI_ISL_6481310, EPI_ISL_6481332, EPI_ISL_6481381, EPI_ISL_6481417, EPI_ISL_6481448, EPI_ISL_6481449, EPI_ISL_6481454, EPI_ISL_6481479, EPI_ISL_6481580, EPI_ISL_6481636, EPI_ISL_6481761, EPI_ISL_6481829, EPI_ISL_6482240, EPI_ISL_6482820, EPI_ISL_6482957, EPI_ISL_6483226, EPI_ISL_6483441, EPI_ISL_6483551, EPI_ISL_6483566, EPI_ISL_6483961, EPI_ISL_6484002, EPI_ISL_6484007, EPI_ISL_6484012, EPI_ISL_6484056, EPI_ISL_6484061, EPI_ISL_6484081, EPI_ISL_6484089, EPI_ISL_6484098, EPI_ISL_6484139, EPI_ISL_6484183, EPI_ISL_6484219, EPI_ISL_6484264, EPI_ISL_6484270, EPI_ISL_6484273, EPI_ISL_6484357, EPI_ISL_6484364, EPI_ISL_6484373, EPI_ISL_6484375, EPI_ISL_6484396, EPI_ISL_6484405, EPI_ISL_6484408, EPI_ISL_6484415, EPI_ISL_6484425, EPI_ISL_6484437, EPI_ISL_6484453, EPI_ISL_6484460, EPI_ISL_6484469, EPI_ISL_6484485, EPI_ISL_6484498, EPI_ISL_6484501, EPI_ISL_6484584, EPI_ISL_6484631, EPI_ISL_6484634, EPI_ISL_6484641, EPI_ISL_6484646, EPI_ISL_6484658, EPI_ISL_6484658, EPI_ISL_6484679, EPI_ISL_6484730, EPI_ISL_6484736, EPI_ISL_6484774, EPI_ISL_6484781, EPI_ISL_6484785, EPI_ISL_6484788, EPI_ISL_6484827, EPI_ISL_6484832, EPI_ISL_6484837, EPI_ISL_6484849, EPI_ISL_6484923, EPI_ISL_6484947, EPI_ISL_6484986, EPI_ISL_6484988, EPI_ISL_6485067, EPI_ISL_6485088, EPI_ISL_6485090, EPI_ISL_6485101, EPI_ISL_6485113, EPI_ISL_6485118, EPI_ISL_6485137, EPI_ISL_6485150, EPI_ISL_6485179, EPI_ISL_6485181, EPI_ISL_6485183, EPI_ISL_6485516, EPI_ISL_6485786, EPI_ISL_6486264, EPI_ISL_6486582, EPI_ISL_6486607, EPI_ISL_6486852, EPI_ISL_6487033, EPI_ISL_6487544, EPI_ISL_6487989, EPI_ISL_6488277, EPI_ISL_6488433, EPI_ISL_6488733, EPI_ISL_6488734, EPI_ISL_6489391, EPI_ISL_6489447, EPI_ISL_6490007 |                                                            |                                                                                                                          |                                                                                                                                                                                                                                                                                                                                                                                                                                                                                                                                                                                                                                                                                                                     |  |  |
| see above                                                                                                                                                                                                                                                                                                                                                                                                                                                                                                                                                                                                                                                                                                                                                                                                                                                                                                                                                                                                                                                                                                                                                                                                                                                                                                                                                                                                                                                                                                                                                                                                                                                                                                                                                                                                                                                                                                                                                                                                                                                                                                                                                                                                                                                                                                                                                                                                                                                                                                                                                                                                                                          | Helix                                                      | Centers for Disease Control and Prevention Division of Viral Diseases, Pathogen Discovery                                | Benjamin Rambo-Martin; Christopher Gulvick; Clinton Paden; Dakota Howard; Dhvani Batra; Duncan MacCannell; Erisa Sula; Helix CA; Jason Caravas; Kristine Lacey; Matthew Schmerer; Peter Cook; Scott Sammons; Shatavia Morrison; Tymeckia Kendall; Victoria Caban Figueroa; Yvette Unoarumhi                                                                                                                                                                                                                                                                                                                                                                                                                         |  |  |
| EPI_ISL_4345755, EPI_ISL_4345826, EPI_ISL_4345830, EPI_ISL_4345849, EPI_ISL_4345859, EPI_ISL_4345862, EPI_ISL_4345895, EPI_ISL_4345910, EPI_ISL_4345936, EPI_ISL_4345948, EPI_ISL_4345983, EPI_ISL_4346006, EPI_ISL_4346017, EPI_ISL_4346068, EPI_ISL_4346119, EPI_ISL_4346123, EPI_ISL_4346124, EPI_ISL_4346150, EPI_ISL_4346151, EPI_ISL_4346161, EPI_ISL_4346236, EPI_ISL_4346243, EPI_ISL_4346277, EPI_ISL_4346326, EPI_ISL_4346335, EPI_ISL_4346340, EPI_ISL_4346343, EPI_ISL_4346391, EPI_ISL_4346400, EPI_ISL_4346407, EPI_ISL_4346430, EPI_ISL_4346462, EPI_ISL_4346509, EPI_ISL_4346513, EPI_ISL_4346557, EPI_ISL_4346564, EPI_ISL_4346574, EPI_ISL_4346633, EPI_ISL_4346637, EPI_ISL_4346656, EPI_ISL_4346784, EPI_ISL_4346788, EPI_ISL_4346825, EPI_ISL_4346840, EPI_ISL_4346897, EPI_ISL_4346907, EPI_ISL_4346914, EPI_ISL_4346957, EPI_ISL_4346976, EPI_ISL_4347002, EPI_ISL_4347013, EPI_ISL_4347026, EPI_ISL_4347029, EPI_ISL_4347098, EPI_ISL_4347114, EPI_ISL_4347162, EPI_ISL_4347173, EPI_ISL_4347179, EPI_ISL_4347185, EPI_ISL_4347221, EPI_ISL_4347239, EPI_ISL_4347267, EPI_ISL_4347317, EPI_ISL_4347338, EPI_ISL_4347405, EPI_ISL_4347427, EPI_ISL_4347444, EPI_ISL_4347464, EPI_ISL_4347483, EPI_ISL_4347518, EPI_ISL_4347544, EPI_ISL_4347548, EPI_ISL_4347554, EPI_ISL_4347576, EPI_ISL_4347582, EPI_ISL_4347619, EPI_ISL_4347627, EPI_ISL_4347631, EPI_ISL_4347663, EPI_ISL_4347697, EPI_ISL_4347699, EPI_ISL_4962237                                                                                                                                                                                                                                                                                                                                                                                                                                                                                                                                                                                                                                                                                                                                                                                                                                                                                                                                                                                                                                                                                                                                                                                                   |                                                            |                                                                                                                          |                                                                                                                                                                                                                                                                                                                                                                                                                                                                                                                                                                                                                                                                                                                     |  |  |
| see above                                                                                                                                                                                                                                                                                                                                                                                                                                                                                                                                                                                                                                                                                                                                                                                                                                                                                                                                                                                                                                                                                                                                                                                                                                                                                                                                                                                                                                                                                                                                                                                                                                                                                                                                                                                                                                                                                                                                                                                                                                                                                                                                                                                                                                                                                                                                                                                                                                                                                                                                                                                                                                          | Helix/Illumina                                             | Centers for Disease Control and Prevention Division of Viral Diseases, Pathogen Discovery                                | Adrian Paskey; Alexandre Bolze; Ary Ascencio; Benjamin Rambo-Martin; Brad Sickler; Charlotte Rivera-Garcia; Christopher Gulvick; Christine Tran; Clinton Paden; Dakota Howard; Lauren Wagner; David Becker; Dhvani Batra; Duncan MacCannell; Efen Sandoval; Eileen De Feo; Elizabeth Cirulli; Eric Allen; Geraint Leván; James Lu; Jan Antico; Jason Caravas; Jason Nguyen; Jimmy Ramirez; Jingtao Liu; Kara Moser; Kelly Barrett; Kim Gietzen; Kristine Lacey; Magnus Isaksson; Marc Laurent; Matthew Schmerer; Matthew Tolentino; Nicole Washington; Peter Cook; Phil Febbo; Ryan Cho; Scott Sammons; Shannon Wickline; Shatavia Morrison; Sherry Wang; Simon White; Tyler Cassens; William Lee; Yvette Unoarumhi |  |  |
| EPI_ISL_3299041, EPI_ISL_3299043                                                                                                                                                                                                                                                                                                                                                                                                                                                                                                                                                                                                                                                                                                                                                                                                                                                                                                                                                                                                                                                                                                                                                                                                                                                                                                                                                                                                                                                                                                                                                                                                                                                                                                                                                                                                                                                                                                                                                                                                                                                                                                                                                                                                                                                                                                                                                                                                                                                                                                                                                                                                                   | Henry Mayo Newhall Hospital                                | Los Angeles County Public Health Laboratories                                                                            | P. Hemarajata et al.                                                                                                                                                                                                                                                                                                                                                                                                                                                                                                                                                                                                                                                                                                |  |  |
| EPI_ISL_4740107, EPI_ISL_4740108                                                                                                                                                                                                                                                                                                                                                                                                                                                                                                                                                                                                                                                                                                                                                                                                                                                                                                                                                                                                                                                                                                                                                                                                                                                                                                                                                                                                                                                                                                                                                                                                                                                                                                                                                                                                                                                                                                                                                                                                                                                                                                                                                                                                                                                                                                                                                                                                                                                                                                                                                                                                                   | Higuera Escalante                                          | Gencore - Universidad de los Andes                                                                                       | Cristian Barrera; Felipe Báez; Gabriela Ariza; Luisa Sacristan; Marcela Guevara; Marcela Mercado; Silvia Restrepo                                                                                                                                                                                                                                                                                                                                                                                                                                                                                                                                                                                                   |  |  |
| EPI_ISL_5054437, EPI_ISL_5054439, EPI_ISL_5054441, EPI_ISL_5054442, EPI_ISL_5054443, EPI_ISL_5054444                                                                                                                                                                                                                                                                                                                                                                                                                                                                                                                                                                                                                                                                                                                                                                                                                                                                                                                                                                                                                                                                                                                                                                                                                                                                                                                                                                                                                                                                                                                                                                                                                                                                                                                                                                                                                                                                                                                                                                                                                                                                                                                                                                                                                                                                                                                                                                                                                                                                                                                                               | Higuera escalante                                          | Gencore - Universidad de los Andes                                                                                       | Cristian Barrera; David González; Gabriela Ariza; Luisa Sacristan; Marcela Guevara; Marcela Mercado; Silvia Restrepo                                                                                                                                                                                                                                                                                                                                                                                                                                                                                                                                                                                                |  |  |
| EPI_ISL_3061858, EPI_ISL_3061859                                                                                                                                                                                                                                                                                                                                                                                                                                                                                                                                                                                                                                                                                                                                                                                                                                                                                                                                                                                                                                                                                                                                                                                                                                                                                                                                                                                                                                                                                                                                                                                                                                                                                                                                                                                                                                                                                                                                                                                                                                                                                                                                                                                                                                                                                                                                                                                                                                                                                                                                                                                                                   | Hospital                                                   | National Reference Center for Viruses of Respiratory Infections, Institut Pasteur, Paris                                 | Alexandra Ducancelle; Angela Brisebarre; Camille Capel; Christophe Malabat; Corinne Maufrais; Etienne Simon-Lorière; Frédéric Lemoine; Hub de Bioinformatique et Biostatistique; Louise Lefrançois; Marion Barbet; Maud Vanpeene; Méline Bizard; Sylvie Behillil; Sylvie Van der Werf; Vincent Enouf                                                                                                                                                                                                                                                                                                                                                                                                                |  |  |
| EPI_ISL_3247166                                                                                                                                                                                                                                                                                                                                                                                                                                                                                                                                                                                                                                                                                                                                                                                                                                                                                                                                                                                                                                                                                                                                                                                                                                                                                                                                                                                                                                                                                                                                                                                                                                                                                                                                                                                                                                                                                                                                                                                                                                                                                                                                                                                                                                                                                                                                                                                                                                                                                                                                                                                                                                    | Hospital Carmen y Severo Ochoa                             | Laboratorio de Virología HUCA                                                                                            | Abreu F; Alvarez-Arguelles ME; Boga JA; Castelló C; Costales I; Coto E; Gómez de Oña J; Martín-Rodríguez G; Melón S; Perez-Martínez Z; Rojo S; Sandoval M                                                                                                                                                                                                                                                                                                                                                                                                                                                                                                                                                           |  |  |
| EPI_ISL_4946243, EPI_ISL_4946244, EPI_ISL_4946245                                                                                                                                                                                                                                                                                                                                                                                                                                                                                                                                                                                                                                                                                                                                                                                                                                                                                                                                                                                                                                                                                                                                                                                                                                                                                                                                                                                                                                                                                                                                                                                                                                                                                                                                                                                                                                                                                                                                                                                                                                                                                                                                                                                                                                                                                                                                                                                                                                                                                                                                                                                                  | Hospital Civil Ipiales                                     | Instituto Nacional de Salud- Dirección de Investigación en Salud Pública                                                 | Carlos Franco-Muñoz; Carmen Osorio; Diana Malo; Diego A. Álvarez-Díaz; Diego Andrés Prada; Gerardo Santamaría; Hector Alejandro Ruiz-Moreno; Jhonnatan Reales-González; Jorge Rivera; Juan Camilo Martínez; Julian Naizaque; Katherine Laiton-Donato; Lisseth Pardo; Magdalena Wiesner; Marcela Mercado-Reyes; María T. Herrera-Sepúlveda; Marta Lopez Blanco; Martha Lucia Ospina Martínez; Paola Rojas; Sergio Gomez; Sheryll Corchuelo; Ángela Alarcon Cruz                                                                                                                                                                                                                                                      |  |  |
| EPI_ISL_3050294                                                                                                                                                                                                                                                                                                                                                                                                                                                                                                                                                                                                                                                                                                                                                                                                                                                                                                                                                                                                                                                                                                                                                                                                                                                                                                                                                                                                                                                                                                                                                                                                                                                                                                                                                                                                                                                                                                                                                                                                                                                                                                                                                                                                                                                                                                                                                                                                                                                                                                                                                                                                                                    | Hospital Clínico Universitario Virgen de la Arrixaca       | Hospital Clínico Universitario Virgen de la Arrixaca                                                                     | Laura Moreno and Luis Gil-Gallardo; Marina Simón                                                                                                                                                                                                                                                                                                                                                                                                                                                                                                                                                                                                                                                                    |  |  |
| EPI_ISL_4985069, EPI_ISL_5094642, EPI_ISL_5094643, EPI_ISL_5094644                                                                                                                                                                                                                                                                                                                                                                                                                                                                                                                                                                                                                                                                                                                                                                                                                                                                                                                                                                                                                                                                                                                                                                                                                                                                                                                                                                                                                                                                                                                                                                                                                                                                                                                                                                                                                                                                                                                                                                                                                                                                                                                                                                                                                                                                                                                                                                                                                                                                                                                                                                                 | Hospital Dr. Hernán Henríquez Aravena                      | Unidad de Genómica y Bioinformática, Núcleo Científico y Tecnológico en Biorecursos (BIOREN), Universidad de La Frontera | Benjamín Durán-Vinet; Benjamín Leyton Carcamán; Claudio Vásquez; María de la Luz Mora; Michel Abanto                                                                                                                                                                                                                                                                                                                                                                                                                                                                                                                                                                                                                |  |  |
| EPI_ISL_4561001                                                                                                                                                                                                                                                                                                                                                                                                                                                                                                                                                                                                                                                                                                                                                                                                                                                                                                                                                                                                                                                                                                                                                                                                                                                                                                                                                                                                                                                                                                                                                                                                                                                                                                                                                                                                                                                                                                                                                                                                                                                                                                                                                                                                                                                                                                                                                                                                                                                                                                                                                                                                                                    | Hospital Francesc de Borja (Gandia)                        | SeqCOVID-SPAIN consortium/IBV(CSIC)                                                                                      | Inmaculada Vidal Catalá; Isabel García Nava and SeqCOVID-SPAIN consortium; Mª Rosa Navarro Cots; Nieves Orta Mira                                                                                                                                                                                                                                                                                                                                                                                                                                                                                                                                                                                                   |  |  |

|                                                                                                                                                                                                                                                                                                                                                                                                                                                                                                                                                                                                                                                                                                                                                                                                                                                                                                                                                                                                                                                                                                                                                                                                                                                                                                                                                                                                                                                                                                                                                                                                                                                                                                                                  |                                                                                        |                                                                                                           |                                                                                                                                                                                                                                                                                                                                                                                                                                                                                                                                                                                                                                                                                                                                                                                                                                                                                                                                                                                                                                                                                                                                                                                                                                                                                                                                                                                                                                                                                                                                                                                                                                           |                                                                                                                                                                                                                                                             |
|----------------------------------------------------------------------------------------------------------------------------------------------------------------------------------------------------------------------------------------------------------------------------------------------------------------------------------------------------------------------------------------------------------------------------------------------------------------------------------------------------------------------------------------------------------------------------------------------------------------------------------------------------------------------------------------------------------------------------------------------------------------------------------------------------------------------------------------------------------------------------------------------------------------------------------------------------------------------------------------------------------------------------------------------------------------------------------------------------------------------------------------------------------------------------------------------------------------------------------------------------------------------------------------------------------------------------------------------------------------------------------------------------------------------------------------------------------------------------------------------------------------------------------------------------------------------------------------------------------------------------------------------------------------------------------------------------------------------------------|----------------------------------------------------------------------------------------|-----------------------------------------------------------------------------------------------------------|-------------------------------------------------------------------------------------------------------------------------------------------------------------------------------------------------------------------------------------------------------------------------------------------------------------------------------------------------------------------------------------------------------------------------------------------------------------------------------------------------------------------------------------------------------------------------------------------------------------------------------------------------------------------------------------------------------------------------------------------------------------------------------------------------------------------------------------------------------------------------------------------------------------------------------------------------------------------------------------------------------------------------------------------------------------------------------------------------------------------------------------------------------------------------------------------------------------------------------------------------------------------------------------------------------------------------------------------------------------------------------------------------------------------------------------------------------------------------------------------------------------------------------------------------------------------------------------------------------------------------------------------|-------------------------------------------------------------------------------------------------------------------------------------------------------------------------------------------------------------------------------------------------------------|
| EPI_ISL_5587611                                                                                                                                                                                                                                                                                                                                                                                                                                                                                                                                                                                                                                                                                                                                                                                                                                                                                                                                                                                                                                                                                                                                                                                                                                                                                                                                                                                                                                                                                                                                                                                                                                                                                                                  | Hospital General Plaza de la Salud                                                     | Instituto de Medicina Tropical & Salud Global, Universidad Iberoamericana (UNIBE)                         | A; Anel; Ann; Calderon; Cuevas; Cuevas Lantigua; Gabriella; Gilda; Guzman Marte; Jabier; Maridania; Paula; Paulino-Ramirez; Rita.; Robert; Rojas Fermin; Sanchez Marmolejos; Tolari Jacobo; Vallejo Degaudenzi; Víctor Virgilio                                                                                                                                                                                                                                                                                                                                                                                                                                                                                                                                                                                                                                                                                                                                                                                                                                                                                                                                                                                                                                                                                                                                                                                                                                                                                                                                                                                                           |                                                                                                                                                                                                                                                             |
| EPI_ISL_5587633, EPI_ISL_5587645, EPI_ISL_5621195, EPI_ISL_5621494, EPI_ISL_5621499, EPI_ISL_5621502                                                                                                                                                                                                                                                                                                                                                                                                                                                                                                                                                                                                                                                                                                                                                                                                                                                                                                                                                                                                                                                                                                                                                                                                                                                                                                                                                                                                                                                                                                                                                                                                                             | Hospital General Plaza de la Salud, Infectious Disease Department                      | Instituto de Medicina Tropical & Salud Global, Universidad Iberoamericana (UNIBE)                         | A; Anel; Ann; Calderon; Cuevas; Cuevas Lantigua; Gabriella; Gilda; Guzman Marte; Jabier; Maridania; Paula; Paulino-Ramirez; Rita.; Robert; Rojas Fermin; Sanchez Marmolejos; Tolari Jacobo; Vallejo Degaudenzi; Víctor Virgilio                                                                                                                                                                                                                                                                                                                                                                                                                                                                                                                                                                                                                                                                                                                                                                                                                                                                                                                                                                                                                                                                                                                                                                                                                                                                                                                                                                                                           |                                                                                                                                                                                                                                                             |
| EPI_ISL_1401468, EPI_ISL_1401469, EPI_ISL_1647956, EPI_ISL_1964218, EPI_ISL_2080928, EPI_ISL_2178834, EPI_ISL_2484009, EPI_ISL_2484015, EPI_ISL_2484016, EPI_ISL_2484021, EPI_ISL_2675283, EPI_ISL_2675287, EPI_ISL_2675297, EPI_ISL_2675301, EPI_ISL_2782354, EPI_ISL_2782381, EPI_ISL_3008237, EPI_ISL_3008254, EPI_ISL_3167157, EPI_ISL_3386935, EPI_ISL_3505910, EPI_ISL_3505916, EPI_ISL_3505920, EPI_ISL_3505924, EPI_ISL_3505925, EPI_ISL_3505926, EPI_ISL_3505931, EPI_ISL_3505933, EPI_ISL_3505938, EPI_ISL_3505941, EPI_ISL_3505944, EPI_ISL_3505946, EPI_ISL_3505950, EPI_ISL_3505951, EPI_ISL_3505954, EPI_ISL_3505955, EPI_ISL_3505956, EPI_ISL_3505959, EPI_ISL_3505965, EPI_ISL_3505966, EPI_ISL_3505972, EPI_ISL_3505974, EPI_ISL_3505977, EPI_ISL_3505979, EPI_ISL_3505980, EPI_ISL_3505981, EPI_ISL_3505986, EPI_ISL_3505989, EPI_ISL_3505990, EPI_ISL_3505991, EPI_ISL_3505992, EPI_ISL_3505993, EPI_ISL_3505994, EPI_ISL_3505995, EPI_ISL_3505996, EPI_ISL_3505997, EPI_ISL_3505999, EPI_ISL_3506000, EPI_ISL_3506001, EPI_ISL_4351984, EPI_ISL_4987001, EPI_ISL_4987029, EPI_ISL_6135444, EPI_ISL_6135499, EPI_ISL_6135500, EPI_ISL_6135501, EPI_ISL_6157320                                                                                                                                                                                                                                                                                                                                                                                                                                                                                                                                                | see above                                                                              | Hospital General Universitario Gregorio Marañón                                                           | Hospital General Universitario Gregorio Marañón                                                                                                                                                                                                                                                                                                                                                                                                                                                                                                                                                                                                                                                                                                                                                                                                                                                                                                                                                                                                                                                                                                                                                                                                                                                                                                                                                                                                                                                                                                                                                                                           | Cristina Rodríguez-Grande; Darío García de Viedma; Jorge Rodríguez-Grande; Julia Suárez; Laura Pérez-Lago; Marta Herranz Martín; Patricia Muñoz; Pedro Sola Campoy; Pilar Catalán; Sergio Buenestado Serrano; Víctor Manuel de la Cueva; Víctor de la Cueva |
| EPI_ISL_3216172, EPI_ISL_3216173, EPI_ISL_3216174, EPI_ISL_3216175, EPI_ISL_3216177, EPI_ISL_3216181, EPI_ISL_3216183, EPI_ISL_3216184, EPI_ISL_3216185, EPI_ISL_3216186, EPI_ISL_3216187, EPI_ISL_3216188, EPI_ISL_3216190, EPI_ISL_3216192, EPI_ISL_3216193, EPI_ISL_3216194, EPI_ISL_3216196, EPI_ISL_3216197, EPI_ISL_3216199, EPI_ISL_3216200, EPI_ISL_3216203, EPI_ISL_3216207, EPI_ISL_3216208, EPI_ISL_3216210, EPI_ISL_3216211, EPI_ISL_3216214, EPI_ISL_3216215, EPI_ISL_3216216, EPI_ISL_3216217, EPI_ISL_3216218, EPI_ISL_3216223, EPI_ISL_3216226, EPI_ISL_3216229, EPI_ISL_3216231, EPI_ISL_3216232, EPI_ISL_3216233, EPI_ISL_3216235, EPI_ISL_3216239, EPI_ISL_3216241, EPI_ISL_4560905, EPI_ISL_4560906, EPI_ISL_4560908, EPI_ISL_4560910, EPI_ISL_4560912, EPI_ISL_4560914, EPI_ISL_4560916, EPI_ISL_4560918, EPI_ISL_4560920, EPI_ISL_4560922, EPI_ISL_4560924, EPI_ISL_4560928, EPI_ISL_4560930, EPI_ISL_4560932, EPI_ISL_4560934, EPI_ISL_4560936, EPI_ISL_4560937, EPI_ISL_4560939, EPI_ISL_4560943, EPI_ISL_4560945, EPI_ISL_4560947, EPI_ISL_4560948, EPI_ISL_4560949, EPI_ISL_4560952, EPI_ISL_4560954, EPI_ISL_4560956, EPI_ISL_4560958, EPI_ISL_4560960, EPI_ISL_4560961, EPI_ISL_4560963, EPI_ISL_4560965, EPI_ISL_4560967, EPI_ISL_4560968, EPI_ISL_4560970, EPI_ISL_4560973, EPI_ISL_4560975, EPI_ISL_4560976, EPI_ISL_4560978, EPI_ISL_4560980, EPI_ISL_4560982, EPI_ISL_4560984, EPI_ISL_4560986, EPI_ISL_4560987, EPI_ISL_4560989, EPI_ISL_4560991, EPI_ISL_4560993, EPI_ISL_4560995, EPI_ISL_4560997, EPI_ISL_4561049, EPI_ISL_4561052, EPI_ISL_4561054, EPI_ISL_4561056, EPI_ISL_4561057, EPI_ISL_4561059, EPI_ISL_4561062, EPI_ISL_4561065, EPI_ISL_4561069, EPI_ISL_4561071, EPI_ISL_4561073 | see above                                                                              | Hospital General Universitario de Alicante - Instituto de Investigación Sanitaria y Biomédica de Alicante | SeqCOVID-SPAIN consortium/IBV(CSIC)                                                                                                                                                                                                                                                                                                                                                                                                                                                                                                                                                                                                                                                                                                                                                                                                                                                                                                                                                                                                                                                                                                                                                                                                                                                                                                                                                                                                                                                                                                                                                                                                       | Carmen Molina Pardines and SeqCOVID-SPAIN consortium; Maripaz Ventero Martín                                                                                                                                                                                |
| EPI_ISL_2927977                                                                                                                                                                                                                                                                                                                                                                                                                                                                                                                                                                                                                                                                                                                                                                                                                                                                                                                                                                                                                                                                                                                                                                                                                                                                                                                                                                                                                                                                                                                                                                                                                                                                                                                  | Hospital Margarita Maza de Juárez                                                      | Microbial Genomics Laboratory                                                                             | ; Alejandra García-Gasca; Alejandra Hernández-Terán; Alejandro Sánchez-Flores; Alfredo Herrera-Estrella; Alicia Ocaña-Mondragón; Andreu Comas-García; Angel Gustavo Salas-Lais; Antonio Loza Román; Bernardo Martínez-Miguel; Blanca Taboada; Brenda Irasema Maldonado-Meza; Bruno Gómez-Gil; Carla Ivón Herrera-Najera; Carlos F. Arias; Celia Boukadda; Clara Esperanza Santacruz-Tinoco; Concepción Grajales-Muñiz; Consorcio Mexicano de Vigilancia Genómica (CoViGen-Mex). Authors (in alphabetical order): Julio Elias Alvarado-Yaah; Cristóbal Cháidez-Quirós; Céliada Duque Molina; Céliada Martínez- Rodríguez; Daniel Fregoso-Rueda; Daniel Lira Morales; Eduardo Becerril-Vargas; Fernando Fontove-Herrera; Fidencio Mejía-Nepomuceno; Francisco Pulido; Gloria Elena Espinosa-Ayala; Gloria María Molina-Salinas; Gloria Vazquez; Hector Esteban Paz-Juárez; Hector Montoya-Fuentes; Helen Haydee Fernanda Ramírez-Plascencia; Irvin González-López; Jean Pierre González; Jesús Hernández; Joel Armando Vázquez-Pérez; Jorge Salas-Hernández; José Antonio Enciso-Moreno; José Arturo Martínez-Orozco; José Esteban Muñoz-Medina; José de Jesús Nuñez-Contreras; Juan Bautista Chale-Dzul; Julissa Enciso-Ibarra; Luis Alberto Ochoa-Carrera; Margarita Matías-Florentino; Mario Mujica-Sánchez; Marissa Perez-García; María Guadalupe Santiago-Mauricio; María Guadalupe de Jesús Mírelles-Rios; Nelly Sélem-Mojica; Pavel Isa; Ricardo Ciria Merce; Ricardo Grande; Rosa María Gutiérrez Rios; Santiago Avila-Rios; Selene Zárate; Susana Lopez; Verónica Mata-Haro; Victor Eduardo García-Arias; Victor Hugo Borja-Aburto |                                                                                                                                                                                                                                                             |
| EPI_ISL_5313811                                                                                                                                                                                                                                                                                                                                                                                                                                                                                                                                                                                                                                                                                                                                                                                                                                                                                                                                                                                                                                                                                                                                                                                                                                                                                                                                                                                                                                                                                                                                                                                                                                                                                                                  | Hospital San Pablo, Coquimbo, Region de Coquimbo                                       | Unidad de Secuenciación y Genómica, USACH                                                                 | Carlos A. Villarreal; Francisco A. Cubillos; Kamila Urbina; Mara Cuevas; Marcelo Cortez-San Martin; Yesseny Vásquez-Martínez                                                                                                                                                                                                                                                                                                                                                                                                                                                                                                                                                                                                                                                                                                                                                                                                                                                                                                                                                                                                                                                                                                                                                                                                                                                                                                                                                                                                                                                                                                              |                                                                                                                                                                                                                                                             |
| EPI_ISL_1914385, EPI_ISL_2080879, EPI_ISL_2080880, EPI_ISL_2080881, EPI_ISL_2080882, EPI_ISL_2645811, EPI_ISL_2725448                                                                                                                                                                                                                                                                                                                                                                                                                                                                                                                                                                                                                                                                                                                                                                                                                                                                                                                                                                                                                                                                                                                                                                                                                                                                                                                                                                                                                                                                                                                                                                                                            | see above                                                                              | Hospital Universitari Arnau de Vilanova                                                                   | Alejandra González-Sánchez; Andrés Antón; Ariadna Rando; Carla Castillo; Cristina Andrés; Damir Garcia-Cehic; Josep Quer; Juliana Esperalba; Maria Carmen Martin; Maria Gema Codina; Maria Piñana; Tomás Pumarola                                                                                                                                                                                                                                                                                                                                                                                                                                                                                                                                                                                                                                                                                                                                                                                                                                                                                                                                                                                                                                                                                                                                                                                                                                                                                                                                                                                                                         |                                                                                                                                                                                                                                                             |
| EPI_ISL_4560899, EPI_ISL_4560901, EPI_ISL_4560903                                                                                                                                                                                                                                                                                                                                                                                                                                                                                                                                                                                                                                                                                                                                                                                                                                                                                                                                                                                                                                                                                                                                                                                                                                                                                                                                                                                                                                                                                                                                                                                                                                                                                | Hospital Universitari Arnau de Vilanova de Lleida                                      | SeqCOVID-SPAIN consortium/IBV(CSIC)                                                                       | Alba Bellés Bellés; Albert Bernet Sánchez; Eric López González; Iván Prats Sánchez; Mercè García González and SeqCOVID-SPAIN consortium                                                                                                                                                                                                                                                                                                                                                                                                                                                                                                                                                                                                                                                                                                                                                                                                                                                                                                                                                                                                                                                                                                                                                                                                                                                                                                                                                                                                                                                                                                   |                                                                                                                                                                                                                                                             |
| EPI_ISL_2637271                                                                                                                                                                                                                                                                                                                                                                                                                                                                                                                                                                                                                                                                                                                                                                                                                                                                                                                                                                                                                                                                                                                                                                                                                                                                                                                                                                                                                                                                                                                                                                                                                                                                                                                  | Hospital Universitari Bellvitge                                                        | Microbiology Department                                                                                   | Aida Gonzalez-Diaz; Carmen Ardanuy; Jordi Camara; Jordi Niubó; Laura Calatayud; M Angeles Dominguez; Miguel Fernandez-Huerta; Sara Marti                                                                                                                                                                                                                                                                                                                                                                                                                                                                                                                                                                                                                                                                                                                                                                                                                                                                                                                                                                                                                                                                                                                                                                                                                                                                                                                                                                                                                                                                                                  |                                                                                                                                                                                                                                                             |
| EPI_ISL_3154860                                                                                                                                                                                                                                                                                                                                                                                                                                                                                                                                                                                                                                                                                                                                                                                                                                                                                                                                                                                                                                                                                                                                                                                                                                                                                                                                                                                                                                                                                                                                                                                                                                                                                                                  | Hospital Universitari Joan XXIII                                                       | Hospital Universitari Joan XXIII                                                                          | Carla Martín; Clara Benavent; Cristina Gutiérrez; Ester Picó; Gemma Recio; Margarida Terrón; Natalia Bastón                                                                                                                                                                                                                                                                                                                                                                                                                                                                                                                                                                                                                                                                                                                                                                                                                                                                                                                                                                                                                                                                                                                                                                                                                                                                                                                                                                                                                                                                                                                               |                                                                                                                                                                                                                                                             |
| EPI_ISL_2397358                                                                                                                                                                                                                                                                                                                                                                                                                                                                                                                                                                                                                                                                                                                                                                                                                                                                                                                                                                                                                                                                                                                                                                                                                                                                                                                                                                                                                                                                                                                                                                                                                                                                                                                  | Hospital Universitari Joan XXIII de Tarragona                                          | Hospital Universitari Vall d'Hebron - Vall d'Hebron Institut de Recerca                                   | Alejandra González-Sánchez; Andrés Antón; Ariadna Rando; Carla Castillo; Cristina Andrés; Damir Garcia-Cehic; Josep Quer; Juliana Esperalba; Maria Carmen Martin; Maria Gema Codina; Maria Piñana; Tomás Pumarola                                                                                                                                                                                                                                                                                                                                                                                                                                                                                                                                                                                                                                                                                                                                                                                                                                                                                                                                                                                                                                                                                                                                                                                                                                                                                                                                                                                                                         |                                                                                                                                                                                                                                                             |
| EPI_ISL_2080877, EPI_ISL_2080878, EPI_ISL_2397352, EPI_ISL_2397354, EPI_ISL_2397355, EPI_ISL_2397355, EPI_ISL_2645801, EPI_ISL_2645813, EPI_ISL_2645814, EPI_ISL_2645815, EPI_ISL_2645816, EPI_ISL_2725445, EPI_ISL_2725446, EPI_ISL_2725447, EPI_ISL_2725449, EPI_ISL_2834250, EPI_ISL_2834252, EPI_ISL_2834259, EPI_ISL_2834261, EPI_ISL_2895661, EPI_ISL_2988388, EPI_ISL_2988397, EPI_ISL_2988399, EPI_ISL_3009922, EPI_ISL_3161802, EPI_ISL_3161803, EPI_ISL_3161804, EPI_ISL_3161805, EPI_ISL_3236337                                                                                                                                                                                                                                                                                                                                                                                                                                                                                                                                                                                                                                                                                                                                                                                                                                                                                                                                                                                                                                                                                                                                                                                                                      | see above                                                                              | Hospital Universitari Vall d'Hebron - Vall d'Hebron Institut de Recerca                                   | Alejandra González-Sánchez; Andrés Antón; Ariadna Rando; Carla Castillo; Cristina Andrés; Damir Garcia-Cehic; Josep Quer; Juliana Esperalba; Karen García; Maria Carmen Martin; Maria Gema Codina; Maria Piñana; Rodrigo Vásquez; Tomás Pumarola                                                                                                                                                                                                                                                                                                                                                                                                                                                                                                                                                                                                                                                                                                                                                                                                                                                                                                                                                                                                                                                                                                                                                                                                                                                                                                                                                                                          |                                                                                                                                                                                                                                                             |
| EPI_ISL_3229429, EPI_ISL_4561003, EPI_ISL_4561008                                                                                                                                                                                                                                                                                                                                                                                                                                                                                                                                                                                                                                                                                                                                                                                                                                                                                                                                                                                                                                                                                                                                                                                                                                                                                                                                                                                                                                                                                                                                                                                                                                                                                | Hospital Universitari i Politècnic La Fe de Valencia                                   | SeqCOVID-SPAIN consortium/IBV(CSIC)                                                                       | Ana Gil Brusola; Eva González Barberá; José Luis López Hontangas and SeqCOVID-SPAIN consortium; María Dolores Gómez Ruiz; Salvador Giner Almaraz                                                                                                                                                                                                                                                                                                                                                                                                                                                                                                                                                                                                                                                                                                                                                                                                                                                                                                                                                                                                                                                                                                                                                                                                                                                                                                                                                                                                                                                                                          |                                                                                                                                                                                                                                                             |
| EPI_ISL_4561027, EPI_ISL_4561029, EPI_ISL_4561031, EPI_ISL_4561033, EPI_ISL_4561035, EPI_ISL_4561037, EPI_ISL_4561039, EPI_ISL_4561041, EPI_ISL_4561043, EPI_ISL_4561045, EPI_ISL_4561047                                                                                                                                                                                                                                                                                                                                                                                                                                                                                                                                                                                                                                                                                                                                                                                                                                                                                                                                                                                                                                                                                                                                                                                                                                                                                                                                                                                                                                                                                                                                        | see above                                                                              | Hospital Universitario Virgen de las Nieves de Granada-SAS                                                | Irene Pedrosa Corral; José M. Navarro-Mari and SeqCOVID-SPAIN consortium; Sara Sanbonmatsu Gámez                                                                                                                                                                                                                                                                                                                                                                                                                                                                                                                                                                                                                                                                                                                                                                                                                                                                                                                                                                                                                                                                                                                                                                                                                                                                                                                                                                                                                                                                                                                                          |                                                                                                                                                                                                                                                             |
| EPI_ISL_4419183, EPI_ISL_5858849                                                                                                                                                                                                                                                                                                                                                                                                                                                                                                                                                                                                                                                                                                                                                                                                                                                                                                                                                                                                                                                                                                                                                                                                                                                                                                                                                                                                                                                                                                                                                                                                                                                                                                 | Hospital Universitario del Valle- Evaristo Garcia                                      | Universidad del Valle                                                                                     | Andres Castillo; Beatriz Parra & Programa Nacional de Caracterización Genómica de SARS-CoV-2; Diana López-Alvarez; Erica M. Aristizaba; Flor Saa; Melissa Solarte; Nelson Rivera Franco; Programa Nacional de Caracterización Genómica de SARS-CoV-2                                                                                                                                                                                                                                                                                                                                                                                                                                                                                                                                                                                                                                                                                                                                                                                                                                                                                                                                                                                                                                                                                                                                                                                                                                                                                                                                                                                      |                                                                                                                                                                                                                                                             |
| EPI_ISL_5199337                                                                                                                                                                                                                                                                                                                                                                                                                                                                                                                                                                                                                                                                                                                                                                                                                                                                                                                                                                                                                                                                                                                                                                                                                                                                                                                                                                                                                                                                                                                                                                                                                                                                                                                  | Hospital Universitario del Valle- Evaristo Garcia Cali - Valle del Cauca               | Instituto Nacional de Salud- Dirección de Investigación en Salud Pública                                  | Beatriz de Arco; Carlos Franco-Muñoz; Carmen Osorio; Diana Malo; Diego A. Álvarez-Díaz; Diego Andrés Prada; Gerardo Santamaría; Hector Alejandro Ruiz-Moreno; Jhonnatan Reales-González; Jorge Rivera; Juan Camilo Martínez; Julian Naizaque; Katherine Laiton-Donato; Lisseth Pardo; Magdalena Wiesner; Marcela Mercado-Reyes; Maria T. Herrera-Sepúlveda; Marta Lopez Blanco; Martha Lucia Ospina Martinez; Paola Rojas; Sergio Gomez; Sheryll Corchuelo; Tatiana Cobos; Ángela Alarcon Cruz                                                                                                                                                                                                                                                                                                                                                                                                                                                                                                                                                                                                                                                                                                                                                                                                                                                                                                                                                                                                                                                                                                                                            |                                                                                                                                                                                                                                                             |
| EPI_ISL_2925678, EPI_ISL_4560895                                                                                                                                                                                                                                                                                                                                                                                                                                                                                                                                                                                                                                                                                                                                                                                                                                                                                                                                                                                                                                                                                                                                                                                                                                                                                                                                                                                                                                                                                                                                                                                                                                                                                                 | Hospital de Cabuñes<br>Hospital de la Santa Creu i Sant Pau. Servicio de Microbiología | Laboratorio de Virología HUCA<br>SeqCOVID-SPAIN consortium/IBV(CSIC)                                      | Abreu F; Alvarez-Arguelles ME; Boga JA; Castelló C; Costales I; Coto E; Gómez de Oña J; Martín-Rodríguez G; Melón S; Perez-Martínez Z; Rojo S; Sandoval M<br>Elisenda Miró and SeqCOVID-SPAIN consortium; Ferran Navarro; Núria Rabella                                                                                                                                                                                                                                                                                                                                                                                                                                                                                                                                                                                                                                                                                                                                                                                                                                                                                                                                                                                                                                                                                                                                                                                                                                                                                                                                                                                                   |                                                                                                                                                                                                                                                             |
| EPI_ISL_3412034, EPI_ISL_3412035, EPI_ISL_3412037, EPI_ISL_3412039                                                                                                                                                                                                                                                                                                                                                                                                                                                                                                                                                                                                                                                                                                                                                                                                                                                                                                                                                                                                                                                                                                                                                                                                                                                                                                                                                                                                                                                                                                                                                                                                                                                               | Hospital of the University of Pennsylvania Molecular Pathology Lab                     | Bushman                                                                                                   | Andrew D. Marques; Aoife M. Roche; Arupa Ganguly; Ayannah S. Fitzgerald; Brendan Kelly; Jevon Graham-Wooten; John K. Everett; Kyle Rodino; Layla A. Khatib; Mike Feldman; Ronald G. Collman and Frederic Bushan; Samantha A. Whiteside; Scott Sherrill-Mix; Shantan Reddy; Young Hwang                                                                                                                                                                                                                                                                                                                                                                                                                                                                                                                                                                                                                                                                                                                                                                                                                                                                                                                                                                                                                                                                                                                                                                                                                                                                                                                                                    |                                                                                                                                                                                                                                                             |
| EPI_ISL_2653037, EPI_ISL_2653046, EPI_ISL_3022779, EPI_ISL_3022799, EPI_ISL_3022800, EPI_ISL_3022801, EPI_ISL_3022837, EPI_ISL_3022925, EPI_ISL_3022926, EPI_ISL_3022944, EPI_ISL_3022948, EPI_ISL_3022949, EPI_ISL_3022957, EPI_ISL_3022965, EPI_ISL_3022966, EPI_ISL_3022988, EPI_ISL_3023097, EPI_ISL_3023099, EPI_ISL_3023145, EPI_ISL_3023272, EPI_ISL_3023290, EPI_ISL_3023326, EPI_ISL_3023356                                                                                                                                                                                                                                                                                                                                                                                                                                                                                                                                                                                                                                                                                                                                                                                                                                                                                                                                                                                                                                                                                                                                                                                                                                                                                                                            | see above                                                                              | Hospital of the University of Pennsylvania Molecular Pathology Lab                                        | Aoife M. Roche; Arupa Ganguly; Ayannah S. Fitzgerald; Brendan Kelly; Jevon Graham-Wooten; John K. Everett; Kyle Rodino; Layla A. Khatib; Mike Feldman; Ronald G. Collman and Frederic Bushan; Samantha A. Whiteside; Scott Sherrill-Mix; Shantan Reddy; Young Hwang                                                                                                                                                                                                                                                                                                                                                                                                                                                                                                                                                                                                                                                                                                                                                                                                                                                                                                                                                                                                                                                                                                                                                                                                                                                                                                                                                                       |                                                                                                                                                                                                                                                             |
| EPI_ISL_3276745                                                                                                                                                                                                                                                                                                                                                                                                                                                                                                                                                                                                                                                                                                                                                                                                                                                                                                                                                                                                                                                                                                                                                                                                                                                                                                                                                                                                                                                                                                                                                                                                                                                                                                                  | Huntington Memorial Hospital                                                           | Los Angeles County Public Health Laboratories                                                             | P. Hemarajata et al.                                                                                                                                                                                                                                                                                                                                                                                                                                                                                                                                                                                                                                                                                                                                                                                                                                                                                                                                                                                                                                                                                                                                                                                                                                                                                                                                                                                                                                                                                                                                                                                                                      |                                                                                                                                                                                                                                                             |
| EPI_ISL_4958017, EPI_ISL_4958025, EPI_ISL_4958026, EPI_ISL_4958027                                                                                                                                                                                                                                                                                                                                                                                                                                                                                                                                                                                                                                                                                                                                                                                                                                                                                                                                                                                                                                                                                                                                                                                                                                                                                                                                                                                                                                                                                                                                                                                                                                                               | ICMT APARTADO                                                                          | Laboratorio Departamental de Salud Publica de Antioquia                                                   | Cristian Arbey Velarde Hoyos; Gloria Isabel Escobar; Idabely Betancur Ortiz; Juan P. Hernandez-Ortiz; Maria Stella López                                                                                                                                                                                                                                                                                                                                                                                                                                                                                                                                                                                                                                                                                                                                                                                                                                                                                                                                                                                                                                                                                                                                                                                                                                                                                                                                                                                                                                                                                                                  |                                                                                                                                                                                                                                                             |
| EPI_ISL_2621161, EPI_ISL_2621168                                                                                                                                                                                                                                                                                                                                                                                                                                                                                                                                                                                                                                                                                                                                                                                                                                                                                                                                                                                                                                                                                                                                                                                                                                                                                                                                                                                                                                                                                                                                                                                                                                                                                                 | ICMT-APARTADO                                                                          | Universidad Nacional de Colombia - Laboratorio Genómico One Health                                        | Andres F. Cardona-Rios; Carlos Franco-Muñoz; Carolina Muñoz-Arango; Celeny Ortiz; Daniel O. Maldonado-Perez; Diego A. Álvarez-Díaz; Hector Alejandro Ruiz-Moreno; Idabely Betancur Ortiz; Jorge E. Osorio; Juan P. Hernandez-Ortiz; Karl A Ciudoderis; Katherine Laiton-Donato; Laura Silvana Perez; Lina M. Hurtado; Marcela Mercado-Reyes; Maria Angélica Maya; Maria Stella López; Rita Almanza Payares; Sandra Ines Cano; Simón Villegas Velásquez                                                                                                                                                                                                                                                                                                                                                                                                                                                                                                                                                                                                                                                                                                                                                                                                                                                                                                                                                                                                                                                                                                                                                                                    |                                                                                                                                                                                                                                                             |
| EPI_ISL_4198463, EPI_ISL_4198465, EPI_ISL_4198466, EPI_ISL_4198467, EPI_ISL_4198470, EPI_ISL_4198472, EPI_ISL_4198473, EPI_ISL_4198478, EPI_ISL_4198480                                                                                                                                                                                                                                                                                                                                                                                                                                                                                                                                                                                                                                                                                                                                                                                                                                                                                                                                                                                                                                                                                                                                                                                                                                                                                                                                                                                                                                                                                                                                                                          | see above                                                                              | IDIME<br>Gencore - Universidad de los Andes                                                               | Cristian Barrera; David González; Gabriela Ariza; Luisa Sacristan; Marcela Guevara; Marcela Mercado; Silvia Restrepo                                                                                                                                                                                                                                                                                                                                                                                                                                                                                                                                                                                                                                                                                                                                                                                                                                                                                                                                                                                                                                                                                                                                                                                                                                                                                                                                                                                                                                                                                                                      |                                                                                                                                                                                                                                                             |
| EPI_ISL_5858808, EPI_ISL_5858858, EPI_ISL_5858874, EPI_ISL_5858879, EPI_ISL_5858880, EPI_ISL_5858885, EPI_ISL_5858886, EPI_ISL_5858893, EPI_ISL_5858900, EPI_ISL_5858904, EPI_ISL_5858922, EPI_ISL_5858929, EPI_ISL_5858930, EPI_ISL_5858936                                                                                                                                                                                                                                                                                                                                                                                                                                                                                                                                                                                                                                                                                                                                                                                                                                                                                                                                                                                                                                                                                                                                                                                                                                                                                                                                                                                                                                                                                     | see above                                                                              | IDIME - Sede Clínica Nueva de Cali                                                                        | Andres Castillo; Beatriz Parra & Programa Nacional de Caracterización Genómica de SARS-CoV-2; Diana López-Alvarez; Erica M. Aristizaba; Flor Saa; Melissa Solarte; Nelson Rivera Franco                                                                                                                                                                                                                                                                                                                                                                                                                                                                                                                                                                                                                                                                                                                                                                                                                                                                                                                                                                                                                                                                                                                                                                                                                                                                                                                                                                                                                                                   |                                                                                                                                                                                                                                                             |
| EPI_ISL_3459395                                                                                                                                                                                                                                                                                                                                                                                                                                                                                                                                                                                                                                                                                                                                                                                                                                                                                                                                                                                                                                                                                                                                                                                                                                                                                                                                                                                                                                                                                                                                                                                                                                                                                                                  | IDIME-CLINICA NUEVA DE CALI                                                            | Instituto Nacional de Salud                                                                               | Carlos Franco-Muñoz; Carmen Osorio; Diana Malo; Diego A. Álvarez-Díaz; Diego Andrés Prada; Gerardo Santamaría; Hector Alejandro Ruiz-Moreno; Jhonnatan Reales-González; Jorge Rivera; Juan Camilo Martínez; Julian Naizaque; Katherine Laiton-Donato; Lisseth Pardo; Magdalena Wiesner; Marcela Mercado-Reyes; Maria T. Herrera-Sepúlveda; Marta Lopez Blanco; Martha Lucia Ospina Martinez; Paola Rojas; Sergio Gomez; Sheryll Corchuelo; Ángela Alarcon Cruz                                                                                                                                                                                                                                                                                                                                                                                                                                                                                                                                                                                                                                                                                                                                                                                                                                                                                                                                                                                                                                                                                                                                                                            |                                                                                                                                                                                                                                                             |
| EPI_ISL_4850561, EPI_ISL_4850562, EPI_ISL_4850563,                                                                                                                                                                                                                                                                                                                                                                                                                                                                                                                                                                                                                                                                                                                                                                                                                                                                                                                                                                                                                                                                                                                                                                                                                                                                                                                                                                                                                                                                                                                                                                                                                                                                               | IMAT S.A.S.                                                                            | Instituto Nacional de Salud- Dirección de Investigación en Salud Pública                                  | Beatriz de Arco; Carlos Franco-Muñoz; Carmen Osorio; Diana Malo; Diego A. Álvarez-Díaz; Gerardo Santamaría; Hector Alejandro Ruiz-Moreno; Jhonnatan Reales-González; Jorge Rivera; Juan Camilo Martínez; Julian Naizaque; Katherine Laiton-Donato; Lisseth Pardo; Magdalena Wiesner; Marcela Mercado-Reyes; Maria T. Herrera-Sepúlveda; Marta Lopez Blanco; Martha Lucia Ospina Martinez; Paola Rojas; Sergio Gomez; Sheryll Corchuelo; Tatiana Cobos; Ángela Alarcon Cruz                                                                                                                                                                                                                                                                                                                                                                                                                                                                                                                                                                                                                                                                                                                                                                                                                                                                                                                                                                                                                                                                                                                                                                |                                                                                                                                                                                                                                                             |





|                                                                                                                                                                                                                                                                                                                                                                                                                                                                                                                                                                                                                                                                                                                                                                                                              |                                                                               |                                                                                    |                                                                                                                                                                                                                                                                                                                                                                                                                                                                                                                                            |
|--------------------------------------------------------------------------------------------------------------------------------------------------------------------------------------------------------------------------------------------------------------------------------------------------------------------------------------------------------------------------------------------------------------------------------------------------------------------------------------------------------------------------------------------------------------------------------------------------------------------------------------------------------------------------------------------------------------------------------------------------------------------------------------------------------------|-------------------------------------------------------------------------------|------------------------------------------------------------------------------------|--------------------------------------------------------------------------------------------------------------------------------------------------------------------------------------------------------------------------------------------------------------------------------------------------------------------------------------------------------------------------------------------------------------------------------------------------------------------------------------------------------------------------------------------|
| EPI_ISL_2657877                                                                                                                                                                                                                                                                                                                                                                                                                                                                                                                                                                                                                                                                                                                                                                                              | Instituto de Diagnóstico Médico                                               | Instituto Nacional de Salud- Dirección de Investigación en Salud Pública           | Carlos Franco-Muñoz; Carmen Osorio; Diana Malo; Diego A. Álvarez-Díaz; Diego Andrés Prada; Gerardo Santamaría; Hector Alejandro Ruiz-Moreno; Jhonattan Reales-González; Jorge Rivera; Juan Camilo Martínez; Julian Naizaque; Katherine Laiton-Donato; Lisseth Pardo; Magdalena Wiesner; Marcela Mercado-Reyes; María T. Herrera-Sepúlveda; Marta Lopez Blanco; Martha Lucia Ospina Martínez; Paola Rojas; Sergio Gomez; Sheryll Corchuelo; Ángela Alarcon Cruz                                                                             |
| EPI_ISL_4207333                                                                                                                                                                                                                                                                                                                                                                                                                                                                                                                                                                                                                                                                                                                                                                                              | Instituto de Investigaciones Biológicas del Trópico (IBT)                     | Corporación para Investigaciones Biológicas-CIB                                    | Jeaneth Mosquera Rendón; Katterine Molina Hoyos; Marcela Mercado Reyes; Uriel A. Hurtado Paez                                                                                                                                                                                                                                                                                                                                                                                                                                              |
| EPI_ISL_3236433, EPI_ISL_3236437, EPI_ISL_3236438, EPI_ISL_3236439, EPI_ISL_3236440, EPI_ISL_3236441, EPI_ISL_3236444, EPI_ISL_3236445, EPI_ISL_3236450, EPI_ISL_3236451                                                                                                                                                                                                                                                                                                                                                                                                                                                                                                                                                                                                                                     | see above                                                                     | Instituto de Medicina Tropical & Salud Global Universidad Iberoamericana           | Grubaguh Lab - Yale School of Public Health<br>Alejandaro Vallejo Degaudenzi; Anderson Brito; Annie Watkins; Chaney Kalinich; Chantal Vogels; Elisa Contreras; Esperanza Mendoza; Isabel Ott; Jessica Rothman; Joseph Fauver; Kendall Billig; Malery Breban; Mary Petrone; Nathan Grubaugh; Robert Paulino-Ramirez; Tara Alpert; Tobias Koch; Victor Virgilio Calderon                                                                                                                                                                     |
| EPI_ISL_3978876                                                                                                                                                                                                                                                                                                                                                                                                                                                                                                                                                                                                                                                                                                                                                                                              | Integrated Covid Hub North East                                               | Wellcome Sanger Institute for the COVID-19 Genomics UK (COG-UK) Consortium         | Cordelia Langford; David K. Jackson; Dominic Kwiatkowski; Ewan Harrison; Ian Johnston; Integrated Covid Hub North East and Alex Alderton; Jeffrey Barrett; John Sillitoe on behalf of the Wellcome Sanger Institute COVID-19 Surveillance Team; Roberto Amato; Sonia Goncalves                                                                                                                                                                                                                                                             |
| EPI_ISL_4212468                                                                                                                                                                                                                                                                                                                                                                                                                                                                                                                                                                                                                                                                                                                                                                                              | Interpath Laboratory                                                          | Seattle Flu Study                                                                  | Amanda Adler; Barry R. Lutz; Benjamin Pelle; Brian Hiatt; Caitlin R. Wolf; Chris D. Frazier; Deborah A. Nickerson; Elisabeth Brandtler; Erica Ryke; Geoff Melly; Helen Y. Chu; Janet A. England; Jay Shendure; Jover Lee; Kairsten Fay; Kirsten Lacombe; Lea M. Starita; Mark J. Rieder; Matthew Richardson; Matthew Thompson; Melissa Truong; Michael Boeckh; Michael Famulare; Misja Ilcin; Peter D. Han; Philip Dykema; Romesh Gautam; Scott Lindquist; Thomas R. Sibley; Trevor Bedford                                                |
| EPI_ISL_2642004, EPI_ISL_2642005, EPI_ISL_2642006, EPI_ISL_2642008, EPI_ISL_2642009, EPI_ISL_2642010, EPI_ISL_2725128                                                                                                                                                                                                                                                                                                                                                                                                                                                                                                                                                                                                                                                                                        | see above                                                                     | Istituto Zooprofilattico Sperimentale del Mezzogiorno                              | Antonio Grimaldi Patrizia Annunziata Francesco Panariello Biancamaria Pierri Claudia Tiberio Teresa Giuliano Valentina Bouche Chiara Colantuono Maria Concetta Cuomo Denise Di Concilio Lucio Di Filippo Anna Manfredi Marcello Salvi Antonio Limone Luigi Atripaldi Pellegrino Cerino Andrea Ballabio Davide Cacchiarelli                                                                                                                                                                                                                 |
| EPI_ISL_4174630                                                                                                                                                                                                                                                                                                                                                                                                                                                                                                                                                                                                                                                                                                                                                                                              | KSL Diagnostics                                                               | University at Buffalo Genomics and Bioinformatics Core                             | Alyssa Pohlman; Amanda Boccolucci; Brandon Marzullo; Donald Yergeau; Jennifer Surtees; Jonathan Bard; Natalie Lamb; Norma Nowak                                                                                                                                                                                                                                                                                                                                                                                                            |
| EPI_ISL_2864200, EPI_ISL_2886222, EPI_ISL_2886223, EPI_ISL_2886224, EPI_ISL_2886227, EPI_ISL_2886228, EPI_ISL_4008105, EPI_ISL_4008108, EPI_ISL_4348705, EPI_ISL_4348959, EPI_ISL_4358318, EPI_ISL_4365206, EPI_ISL_5403608                                                                                                                                                                                                                                                                                                                                                                                                                                                                                                                                                                                  | see above                                                                     | KU Leuven, Rega Institute, Clinical and Epidemiological Virology                   | Bert Vanmechelen; Joan Marti-Carreras; Piet Maes; Tony Wawina-Bokalanga                                                                                                                                                                                                                                                                                                                                                                                                                                                                    |
| EPI_ISL_2092840, EPI_ISL_2227411, EPI_ISL_2248747, EPI_ISL_2658155, EPI_ISL_2894530, EPI_ISL_2894531, EPI_ISL_3190150                                                                                                                                                                                                                                                                                                                                                                                                                                                                                                                                                                                                                                                                                        | see above                                                                     | Kansas Health and Environmental Lab                                                | Ben Olsen; Jonathan Barnell; Katherine Wiggins; Mike Grose; and Phil Adam                                                                                                                                                                                                                                                                                                                                                                                                                                                                  |
| EPI_ISL_4543184, EPI_ISL_4543189, EPI_ISL_4926390, EPI_ISL_5072057                                                                                                                                                                                                                                                                                                                                                                                                                                                                                                                                                                                                                                                                                                                                           | Kentucky State Public Health Lab                                              | Kentucky State Public Health Lab                                                   | Anjaya Tummala; Chitralipi Kattunga; Joshua Tobias; Karim George; Matthew Johnson; Rachel Zinner; Rhonda Lucas; Vaneet Arora; William Grooms                                                                                                                                                                                                                                                                                                                                                                                               |
| EPI_ISL_5071172, EPI_ISL_5071173, EPI_ISL_5071175, EPI_ISL_5071176, EPI_ISL_5071177, EPI_ISL_5071179, EPI_ISL_5071180, EPI_ISL_5071181, EPI_ISL_5071183, EPI_ISL_5071184, EPI_ISL_5071185, EPI_ISL_5071186, EPI_ISL_5071187, EPI_ISL_5071189, EPI_ISL_5071190, EPI_ISL_5071191, EPI_ISL_5071192, EPI_ISL_5071193, EPI_ISL_5071194, EPI_ISL_5071196, EPI_ISL_5071197, EPI_ISL_5071198, EPI_ISL_5071199, EPI_ISL_5071200, EPI_ISL_5072502, EPI_ISL_5072503, EPI_ISL_5072504, EPI_ISL_5072505, EPI_ISL_5072506, EPI_ISL_5072507, EPI_ISL_5072508, EPI_ISL_5072510, EPI_ISL_5072512, EPI_ISL_5072514, EPI_ISL_5072515, EPI_ISL_5072517, EPI_ISL_5072518, EPI_ISL_5072520, EPI_ISL_5072521, EPI_ISL_5072522, EPI_ISL_5072523, EPI_ISL_5072524, EPI_ISL_5072525, EPI_ISL_5072526, EPI_ISL_5072528, EPI_ISL_5072529 | see above                                                                     | LABORATORIO ALIFE HEALTH                                                           | Instituto Nacional de Salud- Dirección de Investigación en Salud Pública<br>Carlos Franco-Muñoz; Carmen Osorio; Diana Malo; Diego A. Álvarez-Díaz; Diego Andrés Prada; Gerardo Santamaría; Hector Alejandro Ruiz-Moreno; Jhonattan Reales-González; Jorge Rivera; Juan Camilo Martínez; Julian Naizaque; Katherine Laiton-Donato; Lisseth Pardo; Magdalena Wiesner; Marcela Mercado-Reyes; María T. Herrera-Sepúlveda; Marta Lopez Blanco; Martha Lucia Ospina Martínez; Paola Rojas; Sergio Gomez; Sheryll Corchuelo; Ángela Alarcon Cruz |
| EPI_ISL_2657873, EPI_ISL_2657874                                                                                                                                                                                                                                                                                                                                                                                                                                                                                                                                                                                                                                                                                                                                                                             | LABORATORIO BIOLOGIA MOLECULAR IMAT SAS                                       | Instituto Nacional de Salud- Dirección de Investigación en Salud Pública           | Carlos Franco-Muñoz; Carmen Osorio; Diana Malo; Diego A. Álvarez-Díaz; Diego Andrés Prada; Gerardo Santamaría; Hector Alejandro Ruiz-Moreno; Jhonattan Reales-González; Jorge Rivera; Juan Camilo Martínez; Julian Naizaque; Katherine Laiton-Donato; Lisseth Pardo; Magdalena Wiesner; Marcela Mercado-Reyes; María T. Herrera-Sepúlveda; Marta Lopez Blanco; Martha Lucia Ospina Martínez; Paola Rojas; Sergio Gomez; Sheryll Corchuelo; Ángela Alarcon Cruz                                                                             |
| EPI_ISL_2674286, EPI_ISL_2674287, EPI_ISL_2674288                                                                                                                                                                                                                                                                                                                                                                                                                                                                                                                                                                                                                                                                                                                                                            | LABORATORIO BIO-TEST                                                          | Instituto Nacional de Salud- Dirección de Investigación en Salud Pública           | Carlos Franco-Muñoz; Carmen Osorio; Diana Malo; Diego A. Álvarez-Díaz; Diego Andrés Prada; Gerardo Santamaría; Hector Alejandro Ruiz-Moreno; Jhonattan Reales-González; Jorge Rivera; Juan Camilo Martínez; Julian Naizaque; Katherine Laiton-Donato; Lisseth Pardo; Magdalena Wiesner; Marcela Mercado-Reyes; María T. Herrera-Sepúlveda; Marta Lopez Blanco; Martha Lucia Ospina Martínez; Paola Rojas; Sergio Gomez; Sheryll Corchuelo; Ángela Alarcon Cruz                                                                             |
| EPI_ISL_5055299, EPI_ISL_5055307, EPI_ISL_5055316                                                                                                                                                                                                                                                                                                                                                                                                                                                                                                                                                                                                                                                                                                                                                            | LABORATORIO BIOLOGIA MOLECULAR UNIVERSIDAD DEL ATLANTICO                      | Instituto Nacional de Salud- Dirección de Investigación en Salud Pública           | Beatriz de Arco; Carlos Franco-Muñoz; Carmen Osorio; Diana Malo; Diego A. Álvarez-Díaz; Diego Andrés Prada; Gerardo Santamaría; Hector Alejandro Ruiz-Moreno; Jhonattan Reales-González; Jorge Rivera; Juan Camilo Martínez; Julian Naizaque; Katherine Laiton-Donato; Lisseth Pardo; Magdalena Wiesner; Marcela Mercado-Reyes; María T. Herrera-Sepúlveda; Marta Lopez Blanco; Martha Lucia Ospina Martínez; Paola Rojas; Sergio Gomez; Sheryll Corchuelo; Tatiana Cobos; Ángela Alarcon Cruz                                             |
| EPI_ISL_2674300                                                                                                                                                                                                                                                                                                                                                                                                                                                                                                                                                                                                                                                                                                                                                                                              | LABORATORIO CARVAJAL                                                          | Instituto Nacional de Salud- Dirección de Investigación en Salud Pública           | Carlos Franco-Muñoz; Carmen Osorio; Diana Malo; Diego A. Álvarez-Díaz; Diego Andrés Prada; Gerardo Santamaría; Hector Alejandro Ruiz-Moreno; Jhonattan Reales-González; Jorge Rivera; Juan Camilo Martínez; Julian Naizaque; Katherine Laiton-Donato; Lisseth Pardo; Magdalena Wiesner; Marcela Mercado-Reyes; María T. Herrera-Sepúlveda; Marta Lopez Blanco; Martha Lucia Ospina Martínez; Paola Rojas; Sergio Gomez; Sheryll Corchuelo; Ángela Alarcon Cruz                                                                             |
| EPI_ISL_2657872                                                                                                                                                                                                                                                                                                                                                                                                                                                                                                                                                                                                                                                                                                                                                                                              | LABORATORIO CLINICA IMBANACO                                                  | Instituto Nacional de Salud- Dirección de Investigación en Salud Pública           | Carlos Franco-Muñoz; Carmen Osorio; Diana Malo; Diego A. Álvarez-Díaz; Diego Andrés Prada; Gerardo Santamaría; Hector Alejandro Ruiz-Moreno; Jhonattan Reales-González; Jorge Rivera; Juan Camilo Martínez; Julian Naizaque; Katherine Laiton-Donato; Lisseth Pardo; Magdalena Wiesner; Marcela Mercado-Reyes; María T. Herrera-Sepúlveda; Marta Lopez Blanco; Martha Lucia Ospina Martínez; Paola Rojas; Sergio Gomez; Sheryll Corchuelo; Ángela Alarcon Cruz                                                                             |
| EPI_ISL_3462745, EPI_ISL_3462746, EPI_ISL_3462749                                                                                                                                                                                                                                                                                                                                                                                                                                                                                                                                                                                                                                                                                                                                                            | LABORATORIO CLINICO BIO-TEST                                                  | Instituto Nacional de Salud                                                        | Carlos Franco-Muñoz; Carmen Osorio; Diana Malo; Diego A. Álvarez-Díaz; Diego Andrés Prada; Gerardo Santamaría; Hector Alejandro Ruiz-Moreno; Jhonattan Reales-González; Jorge Rivera; Juan Camilo Martínez; Julian Naizaque; Katherine Laiton-Donato; Lisseth Pardo; Magdalena Wiesner; Marcela Mercado-Reyes; María T. Herrera-Sepúlveda; Marta Lopez Blanco; Martha Lucia Ospina Martínez; Paola Rojas; Sergio Gomez; Sheryll Corchuelo; Ángela Alarcon Cruz                                                                             |
| EPI_ISL_5055253, EPI_ISL_5055261, EPI_ISL_5055263, EPI_ISL_5055264, EPI_ISL_5055269, EPI_ISL_5055272, EPI_ISL_5055281, EPI_ISL_5055285, EPI_ISL_5055291, EPI_ISL_5055294, EPI_ISL_5055300, EPI_ISL_5055301, EPI_ISL_5055308, EPI_ISL_5055309, EPI_ISL_5055310, EPI_ISL_5055311, EPI_ISL_5055319                                                                                                                                                                                                                                                                                                                                                                                                                                                                                                              | see above                                                                     | LABORATORIO CLINICO COMPENSAR                                                      | Beatriz de Arco; Carlos Franco-Muñoz; Carmen Osorio; Diana Malo; Diego A. Álvarez-Díaz; Diego Andrés Prada; Gerardo Santamaría; Hector Alejandro Ruiz-Moreno; Jhonattan Reales-González; Jorge Rivera; Juan Camilo Martínez; Julian Naizaque; Katherine Laiton-Donato; Lisseth Pardo; Magdalena Wiesner; Marcela Mercado-Reyes; María T. Herrera-Sepúlveda; Marta Lopez Blanco; Martha Lucia Ospina Martínez; Paola Rojas; Sergio Gomez; Sheryll Corchuelo; Tatiana Cobos; Ángela Alarcon Cruz                                             |
| EPI_ISL_4960509, EPI_ISL_4960510, EPI_ISL_4960511, EPI_ISL_4960512, EPI_ISL_4960523, EPI_ISL_4960525                                                                                                                                                                                                                                                                                                                                                                                                                                                                                                                                                                                                                                                                                                         | LABORATORIO CLINICO HEMATOLOGICO                                              | Laboratorio Departamental de Salud Publica de Antioquia                            | Cristian Arbey Velarde Hoyos; Gloria Isabel Escobar; Idabely Betancur Ortiz; Juan P. Hernandez-Ortiz; María Stella López                                                                                                                                                                                                                                                                                                                                                                                                                   |
| EPI_ISL_3274357                                                                                                                                                                                                                                                                                                                                                                                                                                                                                                                                                                                                                                                                                                                                                                                              | LABORATORIO CLINICO LABIN                                                     | Incensa, Instituto Costarricense de Investigación y Enseñanza en Nutrición y Salud | Adriana Godínez; Caterina Guzmán; Claudio Soto-Garita; Estela Cordero; Francisco Duarte; Hebleen Porras; José Luis Vargas; Mariela Gutiérrez Joselyn Prado; Melany Calderón; Nazareth Ruiz & Pei Chan                                                                                                                                                                                                                                                                                                                                      |
| EPI_ISL_2674291                                                                                                                                                                                                                                                                                                                                                                                                                                                                                                                                                                                                                                                                                                                                                                                              | LABORATORIO CLINICO MASVIDA DE LA COSTA                                       | Instituto Nacional de Salud- Dirección de Investigación en Salud Pública           | Carlos Franco-Muñoz; Carmen Osorio; Diana Malo; Diego A. Álvarez-Díaz; Diego Andrés Prada; Gerardo Santamaría; Hector Alejandro Ruiz-Moreno; Jhonattan Reales-González; Jorge Rivera; Juan Camilo Martínez; Julian Naizaque; Katherine Laiton-Donato; Lisseth Pardo; Magdalena Wiesner; Marcela Mercado-Reyes; María T. Herrera-Sepúlveda; Marta Lopez Blanco; Martha Lucia Ospina Martínez; Paola Rojas; Sergio Gomez; Sheryll Corchuelo; Ángela Alarcon Cruz                                                                             |
| EPI_ISL_3274352                                                                                                                                                                                                                                                                                                                                                                                                                                                                                                                                                                                                                                                                                                                                                                                              | LABORATORIO CLINICO UNIVERSIDAD DE COSTA RICA (NUCLEO)                        | Incensa, Instituto Costarricense de Investigación y Enseñanza en Nutrición y Salud | Adriana Godínez; Caterina Guzmán; Claudio Soto-Garita; Estela Cordero; Francisco Duarte; Hebleen Porras; José Luis Vargas; Mariela Gutiérrez Joselyn Prado; Melany Calderón; Nazareth Ruiz & Dimelsa Suarez                                                                                                                                                                                                                                                                                                                                |
| EPI_ISL_2674282, EPI_ISL_2674283                                                                                                                                                                                                                                                                                                                                                                                                                                                                                                                                                                                                                                                                                                                                                                             | LABORATORIO CONTINENTAL                                                       | Instituto Nacional de Salud- Dirección de Investigación en Salud Pública           | Carlos Franco-Muñoz; Carmen Osorio; Diana Malo; Diego A. Álvarez-Díaz; Diego Andrés Prada; Gerardo Santamaría; Hector Alejandro Ruiz-Moreno; Jhonattan Reales-González; Jorge Rivera; Juan Camilo Martínez; Julian Naizaque; Katherine Laiton-Donato; Lisseth Pardo; Magdalena Wiesner; Marcela Mercado-Reyes; María T. Herrera-Sepúlveda; Marta Lopez Blanco; Martha Lucia Ospina Martínez; Paola Rojas; Sergio Gomez; Sheryll Corchuelo; Ángela Alarcon Cruz                                                                             |
| EPI_ISL_3369952                                                                                                                                                                                                                                                                                                                                                                                                                                                                                                                                                                                                                                                                                                                                                                                              | LABORATORIO DE BIOLOGIA MOLECULAR Y BIOTECNOLOGIA                             | Corporacion CorpoGen-Universidad de los Andes-Universidad Central                  | Christian Romero; Jorge Duitama; Juan Manuel Anzola; Laura González; Maryam Chaib De Mares; María Mercedes Zambrano; Nelly Díaz; Patricia Del Portillo; Silvia Restrepo                                                                                                                                                                                                                                                                                                                                                                    |
| EPI_ISL_2674325                                                                                                                                                                                                                                                                                                                                                                                                                                                                                                                                                                                                                                                                                                                                                                                              | LABORATORIO DE INFECCION E INMUNIDAD                                          | Instituto Nacional de Salud- Dirección de Investigación en Salud Pública           | Carlos Franco-Muñoz; Carmen Osorio; Diana Malo; Diego A. Álvarez-Díaz; Diego Andrés Prada; Gerardo Santamaría; Hector Alejandro Ruiz-Moreno; Jhonattan Reales-González; Jorge Rivera; Juan Camilo Martínez; Julian Naizaque; Katherine Laiton-Donato; Lisseth Pardo; Magdalena Wiesner; Marcela Mercado-Reyes; María T. Herrera-Sepúlveda; Marta Lopez Blanco; Martha Lucia Ospina Martínez; Paola Rojas; Sergio Gomez; Sheryll Corchuelo; Ángela Alarcon Cruz                                                                             |
| EPI_ISL_4984640                                                                                                                                                                                                                                                                                                                                                                                                                                                                                                                                                                                                                                                                                                                                                                                              | LABORATORIO ECHAVARRIA                                                        | Laboratorio Departamental de Salud Publica de Antioquia                            | Andrés F. Cardona-Rios; Cristian Arbey Velarde Hoyos; Gloria Isabel Escobar; Idabely Betancur Ortiz; Juan P. Hernandez-Ortiz; María Stella López                                                                                                                                                                                                                                                                                                                                                                                           |
| EPI_ISL_4958019                                                                                                                                                                                                                                                                                                                                                                                                                                                                                                                                                                                                                                                                                                                                                                                              | LABORATORIO HOSPITAL SAN JUAN DE DIOS DE RIONEGRO                             | Laboratorio Departamental de Salud Publica de Antioquia                            | Cristian Arbey Velarde Hoyos; Gloria Isabel Escobar; Idabely Betancur Ortiz; Juan P. Hernandez-Ortiz; María Stella López                                                                                                                                                                                                                                                                                                                                                                                                                   |
| EPI_ISL_5055215                                                                                                                                                                                                                                                                                                                                                                                                                                                                                                                                                                                                                                                                                                                                                                                              | LABORATORIO IMAT                                                              | Instituto Nacional de Salud- Dirección de Investigación en Salud Pública           | Beatriz de Arco; Carlos Franco-Muñoz; Carmen Osorio; Diana Malo; Diego A. Álvarez-Díaz; Diego Andrés Prada; Gerardo Santamaría; Hector Alejandro Ruiz-Moreno; Jhonattan Reales-González; Jorge Rivera; Juan Camilo Martínez; Julian Naizaque; Katherine Laiton-Donato; Lisseth Pardo; Magdalena Wiesner; Marcela Mercado-Reyes; María T. Herrera-Sepúlveda; Marta Lopez Blanco; Martha Lucia Ospina Martínez; Paola Rojas; Sergio Gomez; Sheryll Corchuelo; Tatiana Cobos; Ángela Alarcon Cruz                                             |
| EPI_ISL_3385786                                                                                                                                                                                                                                                                                                                                                                                                                                                                                                                                                                                                                                                                                                                                                                                              | LABORATORIO NANCY FLOREZ GARCIA                                               | Instituto Nacional de Salud- Dirección de Investigación en Salud Pública           | Carlos Franco-Muñoz; Carmen Osorio; Diana Malo; Diego A. Álvarez-Díaz; Diego Andrés Prada; Gerardo Santamaría; Hector Alejandro Ruiz-Moreno; Jhonattan Reales-González; Jorge Rivera; Juan Camilo Martínez; Julian Naizaque; Katherine Laiton-Donato; Lisseth Pardo; Magdalena Wiesner; Marcela Mercado-Reyes; María T. Herrera-Sepúlveda; Marta Lopez Blanco; Martha Lucia Ospina Martínez; Paola Rojas; Sergio Gomez; Sheryll Corchuelo; Ángela Alarcon Cruz                                                                             |
| EPI_ISL_2896232                                                                                                                                                                                                                                                                                                                                                                                                                                                                                                                                                                                                                                                                                                                                                                                              | LACEN do Estado de Mato Grosso                                                | Instituto Adolfo Lutz, Interdisciplinary Procedures Center, Strategic Laboratory   | Caio Vinicius Dias Lopes; Claudia Regina Gonçalves; Claudio Tavares Sacchi; Karoline Rodrigues Campos                                                                                                                                                                                                                                                                                                                                                                                                                                      |
| EPI_ISL_3246157                                                                                                                                                                                                                                                                                                                                                                                                                                                                                                                                                                                                                                                                                                                                                                                              | LATE - Laboratorio de Técnicas Especiais - Hospital Israelita Albert Einstein | LATE - Laboratorio de Técnicas Especiais - Hospital Israelita Albert Einstein      | Alexandre Hideaki Takara; Ana Paula Moreira Sales; Anelísia da Silva Santos; Deivid Amgarten; Erick Gustavo Dorliss; Fernanda de Mello Malta; João Renato Rebello Pinho; Marcio Anunciacao Menezes; Pedro Henrique Sebe Rodrigues; Raquel Riyuzo                                                                                                                                                                                                                                                                                           |
| EPI_ISL_1960081                                                                                                                                                                                                                                                                                                                                                                                                                                                                                                                                                                                                                                                                                                                                                                                              | LDSP                                                                          | Universidad Nacional de Colombia - Laboratorio Genómico One Health                 | Andrés F. Cardona-Rios; Carlos Franco-Muñoz; Carolina Muñoz-Arango; Celeny Ortiz; Daniel O. Maldonado-Perez; Diego A. Álvarez-Díaz; Hector Alejandro Ruiz-Moreno; Idabely Betancur Ortiz; Jorge E. Osorio; Juan P. Hernandez-Ortiz; Karl A Ciuderis; Katherine Laiton-Donato; Laura Silvana Perez; Lina M. Hurtado; Marcela Mercado-Reyes; María Angélica Maya; María Stella López; Rita Alimanza Payares; Sandra Ines Cano; Simón Villegas Velásquez                                                                                      |
| EPI_ISL_3459398, EPI_ISL_3459413                                                                                                                                                                                                                                                                                                                                                                                                                                                                                                                                                                                                                                                                                                                                                                             | LDSP CAQUETA                                                                  | Instituto Nacional de Salud                                                        | Carlos Franco-Muñoz; Carmen Osorio; Diana Malo; Diego A. Álvarez-Díaz; Diego Andrés Prada; Gerardo Santamaría; Hector Alejandro Ruiz-Moreno; Jhonattan Reales-González; Jorge Rivera; Juan Camilo Martínez; Julian Naizaque; Katherine Laiton-Donato; Lisseth Pardo; Magdalena Wiesner; Marcela Mercado-Reyes; María T. Herrera-Sepúlveda; Marta Lopez Blanco; Martha Lucia Ospina Martínez; Paola Rojas; Sergio Gomez; Sheryll Corchuelo; Ángela Alarcon Cruz                                                                             |
| EPI_ISL_3459392, EPI_ISL_3459399,                                                                                                                                                                                                                                                                                                                                                                                                                                                                                                                                                                                                                                                                                                                                                                            | LDSP CESAR                                                                    | Instituto Nacional de Salud                                                        | Carlos Franco-Muñoz; Carmen Osorio; Diana Malo; Diego A. Álvarez-Díaz; Diego Andrés Prada; Gerardo Santamaría; Hector Alejandro Ruiz-Moreno; Jhonattan Reales-González; Jorge Rivera; Juan Camilo Martínez; Julian Naizaque; Katherine Laiton-Donato; Lisseth Pardo; Magdalena Wiesner; Marcela Mercado-Reyes; María T. Herrera-Sepúlveda; Marta Lopez Blanco; Martha Lucia Ospina Martínez; Paola Rojas; Sergio Gomez; Sheryll Corchuelo; Ángela Alarcon Cruz                                                                             |

|                                                                                                                                                                                                                                                                                                                                   |                   |                                                                          |                                                                                                                                                                                                                                                                                                                                                                                                                                                                                                |                                                                                                                                                                                                                                                                                                                                                                                                                                                                |
|-----------------------------------------------------------------------------------------------------------------------------------------------------------------------------------------------------------------------------------------------------------------------------------------------------------------------------------|-------------------|--------------------------------------------------------------------------|------------------------------------------------------------------------------------------------------------------------------------------------------------------------------------------------------------------------------------------------------------------------------------------------------------------------------------------------------------------------------------------------------------------------------------------------------------------------------------------------|----------------------------------------------------------------------------------------------------------------------------------------------------------------------------------------------------------------------------------------------------------------------------------------------------------------------------------------------------------------------------------------------------------------------------------------------------------------|
| EPI_ISL_3459400,<br>EPI_ISL_3459401,<br>EPI_ISL_3462743                                                                                                                                                                                                                                                                           |                   |                                                                          |                                                                                                                                                                                                                                                                                                                                                                                                                                                                                                |                                                                                                                                                                                                                                                                                                                                                                                                                                                                |
| EPI_ISL_2674284                                                                                                                                                                                                                                                                                                                   | LDSP CESAR        | Instituto Nacional de Salud- Dirección de Investigación en Salud Pública | Carlos Franco-Muñoz; Carmen Osorio; Diana Malo; Diego A. Álvarez-Díaz; Diego Andrés Prada; Gerardo Santamaría; Hector Alejandro Ruiz-Moreno; Jhonattan Reales-González; Jorge Rivera; Juan Camilo Martínez; Julian Naizaque; Katherine Laiton-Donato; Lisseth Pardo; Magdalena Wiesner; Marcela Mercado-Reyes; María T. Herrera-Sepúlveda; Marta Lopez Blanco; Martha Lucia Ospina Martínez; Paola Rojas; Sergio Gomez; Sheryll Corchuelo; Ángela Alarcon Cruz                                 |                                                                                                                                                                                                                                                                                                                                                                                                                                                                |
| EPI_ISL_3459391,<br>EPI_ISL_3459402,<br>EPI_ISL_3459403                                                                                                                                                                                                                                                                           | LDSP CUNDINAMARCA | Instituto Nacional de Salud                                              | Carlos Franco-Muñoz; Carmen Osorio; Diana Malo; Diego A. Álvarez-Díaz; Diego Andrés Prada; Gerardo Santamaría; Hector Alejandro Ruiz-Moreno; Jhonattan Reales-González; Jorge Rivera; Juan Camilo Martínez; Julian Naizaque; Katherine Laiton-Donato; Lisseth Pardo; Magdalena Wiesner; Marcela Mercado-Reyes; María T. Herrera-Sepúlveda; Marta Lopez Blanco; Martha Lucia Ospina Martínez; Paola Rojas; Sergio Gomez; Sheryll Corchuelo; Ángela Alarcon Cruz                                 |                                                                                                                                                                                                                                                                                                                                                                                                                                                                |
| EPI_ISL_5055250,<br>EPI_ISL_5055260,<br>EPI_ISL_5055271,<br>EPI_ISL_5055280,<br>EPI_ISL_5055290                                                                                                                                                                                                                                   | LDSP DEL CESAR    | Instituto Nacional de Salud- Dirección de Investigación en Salud Pública | Beatriz de Arco; Carlos Franco-Muñoz; Carmen Osorio; Diana Malo; Diego A. Álvarez-Díaz; Diego Andrés Prada; Gerardo Santamaría; Hector Alejandro Ruiz-Moreno; Jhonattan Reales-González; Jorge Rivera; Juan Camilo Martínez; Julian Naizaque; Katherine Laiton-Donato; Lisseth Pardo; Magdalena Wiesner; Marcela Mercado-Reyes; María T. Herrera-Sepúlveda; Marta Lopez Blanco; Martha Lucia Ospina Martínez; Paola Rojas; Sergio Gomez; Sheryll Corchuelo; Tatiana Cobos; Ángela Alarcon Cruz |                                                                                                                                                                                                                                                                                                                                                                                                                                                                |
| EPI_ISL_2674323,<br>EPI_ISL_2674324                                                                                                                                                                                                                                                                                               | LDSP HUILA        | Instituto Nacional de Salud- Dirección de Investigación en Salud Pública | Carlos Franco-Muñoz; Carmen Osorio; Diana Malo; Diego A. Álvarez-Díaz; Diego Andrés Prada; Gerardo Santamaría; Hector Alejandro Ruiz-Moreno; Jhonattan Reales-González; Jorge Rivera; Juan Camilo Martínez; Julian Naizaque; Katherine Laiton-Donato; Lisseth Pardo; Magdalena Wiesner; Marcela Mercado-Reyes; María T. Herrera-Sepúlveda; Marta Lopez Blanco; Martha Lucia Ospina Martínez; Paola Rojas; Sergio Gomez; Sheryll Corchuelo; Ángela Alarcon Cruz                                 |                                                                                                                                                                                                                                                                                                                                                                                                                                                                |
| EPI_ISL_3921330, EPI_ISL_3921332, EPI_ISL_3921333, EPI_ISL_3921335, EPI_ISL_3921336, EPI_ISL_3921338, EPI_ISL_3921339, EPI_ISL_3921341, EPI_ISL_3921343, EPI_ISL_3921344, EPI_ISL_3921346, EPI_ISL_3921347, EPI_ISL_3921349                                                                                                       | see above         | LDSP SAN ANDRES ISLA                                                     | Instituto Nacional de Salud- Dirección de Investigación en Salud Pública                                                                                                                                                                                                                                                                                                                                                                                                                       | Carlos Franco-Muñoz; Carmen Osorio; Diana Malo; Diego A. Álvarez-Díaz; Diego Andrés Prada; Gerardo Santamaría; Hector Alejandro Ruiz-Moreno; Jhonattan Reales-González; Jorge Rivera; Juan Camilo Martínez; Julian Naizaque; Katherine Laiton-Donato; Lisseth Pardo; Magdalena Wiesner; Marcela Mercado-Reyes; María T. Herrera-Sepúlveda; Marta Lopez Blanco; Martha Lucia Ospina Martínez; Paola Rojas; Sergio Gomez; Sheryll Corchuelo; Ángela Alarcon Cruz |
| EPI_ISL_2674317,<br>EPI_ISL_2674318                                                                                                                                                                                                                                                                                               | LDSP TOLIMA       | Instituto Nacional de Salud- Dirección de Investigación en Salud Pública | Carlos Franco-Muñoz; Carmen Osorio; Diana Malo; Diego A. Álvarez-Díaz; Diego Andrés Prada; Gerardo Santamaría; Hector Alejandro Ruiz-Moreno; Jhonattan Reales-González; Jorge Rivera; Juan Camilo Martínez; Julian Naizaque; Katherine Laiton-Donato; Lisseth Pardo; Magdalena Wiesner; Marcela Mercado-Reyes; María T. Herrera-Sepúlveda; Marta Lopez Blanco; Martha Lucia Ospina Martínez; Paola Rojas; Sergio Gomez; Sheryll Corchuelo; Ángela Alarcon Cruz                                 |                                                                                                                                                                                                                                                                                                                                                                                                                                                                |
| EPI_ISL_4984575,<br>EPI_ISL_4984584,<br>EPI_ISL_4984594,<br>EPI_ISL_4984605,<br>EPI_ISL_4984610                                                                                                                                                                                                                                   | LDSP de Antioquia | Laboratorio Departamental de Salud Publica de Antioquia                  | Andres F. Cardona-Rios; Cristian Arbey Velarde Hoyos; Gloria Isabel Escobar; Idabely Betancur Ortiz; Juan P. Hernandez-Ortiz; Maria Stella López                                                                                                                                                                                                                                                                                                                                               |                                                                                                                                                                                                                                                                                                                                                                                                                                                                |
| EPI_ISL_2861187, EPI_ISL_2966415, EPI_ISL_3265626, EPI_ISL_3265634, EPI_ISL_3265635, EPI_ISL_3265636, EPI_ISL_3459998, EPI_ISL_3769086                                                                                                                                                                                            | see above         | LESP Aguascalientes                                                      | Instituto de Diagnostico y Referencia Epidemiologicos (INDRE)                                                                                                                                                                                                                                                                                                                                                                                                                                  | Abril Rodriguez-Maldonado; Ariadna Medina-Benitez; Claudia Wong-Arambula; Ernesto Ramirez-Gonzalez.; Gisela Barrera-Badillo; Irma Lopez-Martinez; Joaquin Quiroz-Mercado; Lucia Hernandez-Rivas; Maribel Gonzalez-Villa; Natividad Cruz-Ortiz; Sergio Rangel-Guerrero; Tatiana Nunez-Garcia; Vanessa Rivero-Arredondo                                                                                                                                          |
| EPI_ISL_3265647                                                                                                                                                                                                                                                                                                                   | LESP Campeche     | Instituto de Diagnostico y Referencia Epidemiologicos (INDRE)            | Abril Rodriguez-Maldonado; Ariadna Medina-Benitez; Claudia Wong-Arambula; Ernesto Ramirez-Gonzalez.; Gisela Barrera-Badillo; Irma Lopez-Martinez; Joaquin Quiroz-Mercado; Lucia Hernandez-Rivas; Maribel Gonzalez-Villa; Natividad Cruz-Ortiz; Sergio Rangel-Guerrero; Tatiana Nunez-Garcia; Vanessa Rivero-Arredondo                                                                                                                                                                          |                                                                                                                                                                                                                                                                                                                                                                                                                                                                |
| EPI_ISL_2966376                                                                                                                                                                                                                                                                                                                   | LESP Chihuahua    | Instituto de Diagnostico y Referencia Epidemiologicos (INDRE)            | Abril Rodriguez-Maldonado; Ariadna Medina-Benitez; Claudia Wong-Arambula; Ernesto Ramirez-Gonzalez.; Gisela Barrera-Badillo; Irma Lopez-Martinez; Joaquin Quiroz-Mercado; Lucia Hernandez-Rivas; Maribel Gonzalez-Villa; Natividad Cruz-Ortiz; Sergio Rangel-Guerrero; Tatiana Nunez-Garcia; Vanessa Rivero-Arredondo                                                                                                                                                                          |                                                                                                                                                                                                                                                                                                                                                                                                                                                                |
| EPI_ISL_2158315, EPI_ISL_2158316, EPI_ISL_2158317, EPI_ISL_2709703, EPI_ISL_2709712, EPI_ISL_2709720, EPI_ISL_2861193, EPI_ISL_2861194, EPI_ISL_2861196, EPI_ISL_2966361, EPI_ISL_2966362, EPI_ISL_2966382, EPI_ISL_2966383, EPI_ISL_2966384, EPI_ISL_2966392, EPI_ISL_2966399, EPI_ISL_2966400, EPI_ISL_2966402, EPI_ISL_3046122 | see above         | LESP Ciudad de Mexico                                                    | Instituto de Diagnostico y Referencia Epidemiologicos (INDRE)                                                                                                                                                                                                                                                                                                                                                                                                                                  | Abril Rodriguez-Maldonado; Ariadna Medina-Benitez; Claudia Wong-Arambula; Ernesto Ramirez-Gonzalez.; Gisela Barrera-Badillo; Irma Lopez-Martinez; Joaquin Quiroz-Mercado; Lucia Hernandez-Rivas; Maribel Gonzalez-Villa; Natividad Cruz-Ortiz; Sergio Rangel-Guerrero; Tatiana Nunez-Garcia; Vanessa Rivero-Arredondo                                                                                                                                          |
| EPI_ISL_3769100                                                                                                                                                                                                                                                                                                                   | LESP Colima       | Instituto de Diagnostico y Referencia Epidemiologicos (INDRE)            | Abril Rodriguez-Maldonado; Ariadna Medina-Benitez; Claudia Wong-Arambula; Ernesto Ramirez-Gonzalez.; Gisela Barrera-Badillo; Irma Lopez-Martinez; Joaquin Quiroz-Mercado; Lucia Hernandez-Rivas; Maribel Gonzalez-Villa; Natividad Cruz-Ortiz; Sergio Rangel-Guerrero; Tatiana Nunez-Garcia; Vanessa Rivero-Arredondo                                                                                                                                                                          |                                                                                                                                                                                                                                                                                                                                                                                                                                                                |
| EPI_ISL_2709705, EPI_ISL_2709721, EPI_ISL_3265622, EPI_ISL_3265623, EPI_ISL_3265629, EPI_ISL_3265630, EPI_ISL_3265631, EPI_ISL_3265632                                                                                                                                                                                            | see above         | LESP Estado de Mexico                                                    | Instituto de Diagnostico y Referencia Epidemiologicos (INDRE)                                                                                                                                                                                                                                                                                                                                                                                                                                  | Abril Rodriguez-Maldonado; Ariadna Medina-Benitez; Claudia Wong-Arambula; Ernesto Ramirez-Gonzalez.; Gisela Barrera-Badillo; Irma Lopez-Martinez; Joaquin Quiroz-Mercado; Lucia Hernandez-Rivas; Maribel Gonzalez-Villa; Natividad Cruz-Ortiz; Sergio Rangel-Guerrero; Tatiana Nunez-Garcia; Vanessa Rivero-Arredondo                                                                                                                                          |
| EPI_ISL_2492481, EPI_ISL_2492482, EPI_ISL_2492483, EPI_ISL_2709724, EPI_ISL_2800941, EPI_ISL_3459996, EPI_ISL_3459997                                                                                                                                                                                                             | see above         | LESP Guanajuato                                                          | Instituto de Diagnostico y Referencia Epidemiologicos (INDRE)                                                                                                                                                                                                                                                                                                                                                                                                                                  | Abril Rodriguez-Maldonado; Ariadna Medina-Benitez; Claudia Wong-Arambula; Ernesto Ramirez-Gonzalez.; Gisela Barrera-Badillo; Irma Lopez-Martinez; Joaquin Quiroz-Mercado; Lucia Hernandez-Rivas; Maribel Gonzalez-Villa; Natividad Cruz-Ortiz; Sergio Rangel-Guerrero; Tatiana Nunez-Garcia; Vanessa Rivero-Arredondo                                                                                                                                          |
| EPI_ISL_2861173,<br>EPI_ISL_3033636,<br>EPI_ISL_3046111,<br>EPI_ISL_3265620                                                                                                                                                                                                                                                       | LESP Hidalgo      | Instituto de Diagnostico y Referencia Epidemiologicos (INDRE)            | Abril Rodriguez-Maldonado; Ariadna Medina-Benitez; Claudia Wong-Arambula; Ernesto Ramirez-Gonzalez.; Gisela Barrera-Badillo; Irma Lopez-Martinez; Joaquin Quiroz-Mercado; Lucia Hernandez-Rivas; Maribel Gonzalez-Villa; Natividad Cruz-Ortiz; Sergio Rangel-Guerrero; Tatiana Nunez-Garcia; Vanessa Rivero-Arredondo                                                                                                                                                                          |                                                                                                                                                                                                                                                                                                                                                                                                                                                                |
| EPI_ISL_3046117,<br>EPI_ISL_3460000,<br>EPI_ISL_3923772                                                                                                                                                                                                                                                                           | LESP Jalisco      | Instituto de Diagnostico y Referencia Epidemiologicos (INDRE)            | Abril Rodriguez-Maldonado; Ariadna Medina-Benitez; Claudia Wong-Arambula; Ernesto Ramirez-Gonzalez.; Gisela Barrera-Badillo; Irma Lopez-Martinez; Joaquin Quiroz-Mercado; Lucia Hernandez-Rivas; Maribel Gonzalez-Villa; Natividad Cruz-Ortiz; Sergio Rangel-Guerrero; Tatiana Nunez-Garcia; Vanessa Rivero-Arredondo                                                                                                                                                                          |                                                                                                                                                                                                                                                                                                                                                                                                                                                                |
| EPI_ISL_2861172, EPI_ISL_3046112, EPI_ISL_3046113, EPI_ISL_3046114, EPI_ISL_3046115, EPI_ISL_3046116, EPI_ISL_3046118, EPI_ISL_3046119, EPI_ISL_3046120, EPI_ISL_3046121, EPI_ISL_3265643, EPI_ISL_3459990, EPI_ISL_3460001, EPI_ISL_4299038                                                                                      | see above         | LESP Michoacan                                                           | Instituto de Diagnostico y Referencia Epidemiologicos (INDRE)                                                                                                                                                                                                                                                                                                                                                                                                                                  | Abril Rodriguez-Maldonado; Ariadna Medina-Benitez; Claudia Wong-Arambula; Ernesto Ramirez-Gonzalez.; Gisela Barrera-Badillo; Irma Lopez-Martinez; Joaquin Quiroz-Mercado; Lucia Hernandez-Rivas; Maribel Gonzalez-Villa; Natividad Cruz-Ortiz; Sergio Rangel-Guerrero; Tatiana Nunez-Garcia; Vanessa Rivero-Arredondo                                                                                                                                          |
| EPI_ISL_3459994,<br>EPI_ISL_3459995                                                                                                                                                                                                                                                                                               | LESP Morelos      | Instituto de Diagnostico y Referencia Epidemiologicos (INDRE)            | Abril Rodriguez-Maldonado; Ariadna Medina-Benitez; Claudia Wong-Arambula; Ernesto Ramirez-Gonzalez.; Gisela Barrera-Badillo; Irma Lopez-Martinez; Joaquin Quiroz-Mercado; Lucia Hernandez-Rivas; Maribel Gonzalez-Villa; Natividad Cruz-Ortiz; Sergio Rangel-Guerrero; Tatiana Nunez-Garcia; Vanessa Rivero-Arredondo                                                                                                                                                                          |                                                                                                                                                                                                                                                                                                                                                                                                                                                                |
| EPI_ISL_3459999                                                                                                                                                                                                                                                                                                                   | LESP Nayarit      | Instituto de Diagnostico y Referencia Epidemiologicos (INDRE)            | Abril Rodriguez-Maldonado; Ariadna Medina-Benitez; Claudia Wong-Arambula; Ernesto Ramirez-Gonzalez.; Gisela Barrera-Badillo; Irma Lopez-Martinez; Joaquin Quiroz-Mercado; Lucia Hernandez-Rivas; Maribel Gonzalez-Villa; Natividad Cruz-Ortiz; Sergio Rangel-Guerrero; Tatiana Nunez-Garcia; Vanessa Rivero-Arredondo                                                                                                                                                                          |                                                                                                                                                                                                                                                                                                                                                                                                                                                                |
| EPI_ISL_2492467,<br>EPI_ISL_2492475,<br>EPI_ISL_2709689,<br>EPI_ISL_2709729,<br>EPI_ISL_2861160                                                                                                                                                                                                                                   | LESP Nuevo Leon   | Instituto de Diagnostico y Referencia Epidemiologicos (INDRE)            | Abril Rodriguez-Maldonado; Ariadna Medina-Benitez; Claudia Wong-Arambula; Ernesto Ramirez-Gonzalez.; Gisela Barrera-Badillo; Irma Lopez-Martinez; Joaquin Quiroz-Mercado; Lucia Hernandez-Rivas; Maribel Gonzalez-Villa; Natividad Cruz-Ortiz; Sergio Rangel-Guerrero; Tatiana Nunez-Garcia; Vanessa Rivero-Arredondo                                                                                                                                                                          |                                                                                                                                                                                                                                                                                                                                                                                                                                                                |
| EPI_ISL_2861175, EPI_ISL_2966367, EPI_ISL_2966407, EPI_ISL_3459991, EPI_ISL_3459992, EPI_ISL_3459993, EPI_ISL_3769085                                                                                                                                                                                                             | see above         | LESP Queretaro                                                           | Instituto de Diagnostico y Referencia Epidemiologicos (INDRE)                                                                                                                                                                                                                                                                                                                                                                                                                                  | Abril Rodriguez-Maldonado; Ariadna Medina-Benitez; Claudia Wong-Arambula; Ernesto Ramirez-Gonzalez.; Gisela Barrera-Badillo; Irma Lopez-Martinez; Joaquin Quiroz-Mercado; Lucia Hernandez-Rivas; Maribel Gonzalez-Villa; Natividad Cruz-Ortiz; Sergio Rangel-Guerrero; Tatiana Nunez-Garcia; Vanessa Rivero-Arredondo                                                                                                                                          |
| EPI_ISL_2492495,<br>EPI_ISL_2492496,<br>EPI_ISL_2800938,<br>EPI_ISL_3923774                                                                                                                                                                                                                                                       | LESP Quintana Roo | Instituto de Diagnostico y Referencia Epidemiologicos (INDRE)            | Abril Rodriguez-Maldonado; Ariadna Medina-Benitez; Claudia Wong-Arambula; Ernesto Ramirez-Gonzalez.; Gisela Barrera-Badillo; Irma Lopez-Martinez; Joaquin Quiroz-Mercado; Lucia Hernandez-Rivas; Maribel Gonzalez-Villa; Natividad Cruz-Ortiz; Sergio Rangel-Guerrero; Tatiana Nunez-Garcia; Vanessa Rivero-Arredondo                                                                                                                                                                          |                                                                                                                                                                                                                                                                                                                                                                                                                                                                |
| EPI_ISL_3265644,<br>EPI_ISL_3265645,<br>EPI_ISL_3265646                                                                                                                                                                                                                                                                           | LESP Sonora       | Instituto de Diagnostico y Referencia Epidemiologicos (INDRE)            | Abril Rodriguez-Maldonado; Ariadna Medina-Benitez; Claudia Wong-Arambula; Ernesto Ramirez-Gonzalez.; Gisela Barrera-Badillo; Irma Lopez-Martinez; Joaquin Quiroz-Mercado; Lucia Hernandez-Rivas; Maribel Gonzalez-Villa; Natividad Cruz-Ortiz; Sergio Rangel-Guerrero; Tatiana Nunez-Garcia; Vanessa Rivero-Arredondo                                                                                                                                                                          |                                                                                                                                                                                                                                                                                                                                                                                                                                                                |
| EPI_ISL_2800939,<br>EPI_ISL_2800940,<br>EPI_ISL_2861177,<br>EPI_ISL_2861191,<br>EPI_ISL_2966412,<br>EPI_ISL_4917852                                                                                                                                                                                                               | LESP Tabasco      | Instituto de Diagnostico y Referencia Epidemiologicos (INDRE)            | Abril Rodriguez-Maldonado; Ariadna Medina-Benitez; Claudia Wong-Arambula; Ernesto Ramirez-Gonzalez.; Fernando Gonzalez-Dominguez; Gisela Barrera-Badillo; Irma Lopez-Martinez; Joaquin Quiroz-Mercado; Lucia Hernandez-Rivas; Maribel Gonzalez-Villa; Natividad Cruz-Ortiz; Sergio Rangel-Guerrero; Tatiana Nunez-Garcia; Vanessa Rivero-Arredondo                                                                                                                                             |                                                                                                                                                                                                                                                                                                                                                                                                                                                                |
| EPI_ISL_3460002                                                                                                                                                                                                                                                                                                                   | LESP Tamaulipas   | Instituto de Diagnostico y Referencia Epidemiologicos (INDRE)            | Abril Rodriguez-Maldonado; Ariadna Medina-Benitez; Claudia Wong-Arambula; Ernesto Ramirez-Gonzalez.; Gisela Barrera-Badillo; Irma Lopez-Martinez; Joaquin Quiroz-Mercado; Lucia Hernandez-Rivas; Maribel Gonzalez-Villa; Natividad Cruz-Ortiz; Sergio Rangel-Guerrero; Tatiana Nunez-Garcia; Vanessa Rivero-Arredondo                                                                                                                                                                          |                                                                                                                                                                                                                                                                                                                                                                                                                                                                |
| EPI_ISL_2709723,<br>EPI_ISL_3265637,<br>EPI_ISL_3265639,<br>EPI_ISL_3265640,<br>EPI_ISL_3265641,<br>EPI_ISL_3923775                                                                                                                                                                                                               | LESP Veracruz     | Instituto de Diagnostico y Referencia Epidemiologicos (INDRE)            | Abril Rodriguez-Maldonado; Ariadna Medina-Benitez; Claudia Wong-Arambula; Ernesto Ramirez-Gonzalez.; Gisela Barrera-Badillo; Irma Lopez-Martinez; Joaquin Quiroz-Mercado; Lucia Hernandez-Rivas; Maribel Gonzalez-Villa; Natividad Cruz-Ortiz; Sergio Rangel-Guerrero; Tatiana Nunez-Garcia; Vanessa Rivero-Arredondo                                                                                                                                                                          |                                                                                                                                                                                                                                                                                                                                                                                                                                                                |
| EPI_ISL_3342148, EPI_ISL_3342152, EPI_ISL_4958018, EPI_ISL_4984836, EPI_ISL_4984852, EPI_ISL_4984856, EPI_ISL_4984862, EPI_ISL_4984871, EPI_ISL_4984875, EPI_ISL_5923350, EPI_ISL_5923355, EPI_ISL_5923358, EPI_ISL_5923357, EPI_ISL_5923358, EPI_ISL_5923359, EPI_ISL_5923361                                                    | see above         | LIME                                                                     | Laboratorio Departamental de Salud Publica de Antioquia                                                                                                                                                                                                                                                                                                                                                                                                                                        | Ana Victoria Valencia Duarte; Andres F. Cardona-Rios; Cristian Arbey Velarde Hoyos; Gloria Isabel Escobar; Idabely Betancur Ortiz; Juan P. Hernandez-Ortiz; Juan Pablo Isaza Agudelo; Maria Stella López                                                                                                                                                                                                                                                       |
| EPI_ISL_4196885, EPI_ISL_4196907, EPI_ISL_4196913, EPI_ISL_4196915, EPI_ISL_4196916, EPI_ISL_4196922, EPI_ISL_4212128, EPI_ISL_4212130, EPI_ISL_4212131, EPI_ISL_4212134, EPI_ISL_4212139, EPI_ISL_4212144, EPI_ISL_4212146, EPI_ISL_4212149, EPI_ISL_4212151, EPI_ISL_4212154, EPI_ISL_4212159, EPI_ISL_4212163, EPI_ISL_4212166 | see above         | LSP DISTRITAL BOGOTA                                                     | Gencore - Universidad de los Andes                                                                                                                                                                                                                                                                                                                                                                                                                                                             | Alejandro Gomez; Cristian Barrera; Gabriela Ariza; Gabriela Delgado; Johana Hernandez; Luisa Sacristan; Marcela Guevara; Marcela Mercado; Silvia Restrepo                                                                                                                                                                                                                                                                                                      |
| EPI_ISL_5781640                                                                                                                                                                                                                                                                                                                   | LSP NARIÑO        | Gencore - Universidad de los Andes                                       | Cristian Barrera; David González; Gabriela Ariza; Luisa Sacristan; Marcela Guevara; Marcela Mercado; Silvia Restrepo                                                                                                                                                                                                                                                                                                                                                                           |                                                                                                                                                                                                                                                                                                                                                                                                                                                                |

|                                                                                                                                                                                                                                                                                                                                                                                                                                                                                                                                                                                                                                                                                                                                                           |                                                            |                                                                                                                                             |                                                                                                                                                                                                                                                                                                                                                                                                                                                                                                                                                                                                                                                                                                                                                                                                                                                                                                                                                                                                                                                                                                                                                                                                                                                                                                                                                                                                                                                                                                                                                                                                                                                                         |                                                                                                                                                                                                                                                                                                                                                                                                                                                                                                                                                                                                                                                                                                                                                                                                                                                                                                                                                                                                                                                                                                                                                                                                                                                                                                                                                                                                                                                                                                                                                                                                                                                                                                      |
|-----------------------------------------------------------------------------------------------------------------------------------------------------------------------------------------------------------------------------------------------------------------------------------------------------------------------------------------------------------------------------------------------------------------------------------------------------------------------------------------------------------------------------------------------------------------------------------------------------------------------------------------------------------------------------------------------------------------------------------------------------------|------------------------------------------------------------|---------------------------------------------------------------------------------------------------------------------------------------------|-------------------------------------------------------------------------------------------------------------------------------------------------------------------------------------------------------------------------------------------------------------------------------------------------------------------------------------------------------------------------------------------------------------------------------------------------------------------------------------------------------------------------------------------------------------------------------------------------------------------------------------------------------------------------------------------------------------------------------------------------------------------------------------------------------------------------------------------------------------------------------------------------------------------------------------------------------------------------------------------------------------------------------------------------------------------------------------------------------------------------------------------------------------------------------------------------------------------------------------------------------------------------------------------------------------------------------------------------------------------------------------------------------------------------------------------------------------------------------------------------------------------------------------------------------------------------------------------------------------------------------------------------------------------------|------------------------------------------------------------------------------------------------------------------------------------------------------------------------------------------------------------------------------------------------------------------------------------------------------------------------------------------------------------------------------------------------------------------------------------------------------------------------------------------------------------------------------------------------------------------------------------------------------------------------------------------------------------------------------------------------------------------------------------------------------------------------------------------------------------------------------------------------------------------------------------------------------------------------------------------------------------------------------------------------------------------------------------------------------------------------------------------------------------------------------------------------------------------------------------------------------------------------------------------------------------------------------------------------------------------------------------------------------------------------------------------------------------------------------------------------------------------------------------------------------------------------------------------------------------------------------------------------------------------------------------------------------------------------------------------------------|
| EPI_ISL_6121040                                                                                                                                                                                                                                                                                                                                                                                                                                                                                                                                                                                                                                                                                                                                           | LSP Tolima                                                 | Laboratorio de biotecnología, Universidad Icesi                                                                                             | Adrián Camilo Rodríguez Ararat; Diana M. Florez Giraldo; Marcela Mercado; María F. Villegas Torres; María I. Gutiérrez López; Paola A. Caicedo Burbano; Programa Nacional de Caracterización Genómica de SARS-CoV-2; Sara González Henao                                                                                                                                                                                                                                                                                                                                                                                                                                                                                                                                                                                                                                                                                                                                                                                                                                                                                                                                                                                                                                                                                                                                                                                                                                                                                                                                                                                                                                |                                                                                                                                                                                                                                                                                                                                                                                                                                                                                                                                                                                                                                                                                                                                                                                                                                                                                                                                                                                                                                                                                                                                                                                                                                                                                                                                                                                                                                                                                                                                                                                                                                                                                                      |
| EPI_ISL_4417563, EPI_ISL_4417564, EPI_ISL_4417565, EPI_ISL_4417566, EPI_ISL_4417567, EPI_ISL_4417568, EPI_ISL_4417569, EPI_ISL_4417570, EPI_ISL_4417571, EPI_ISL_4417572, EPI_ISL_4417573, EPI_ISL_4417574, EPI_ISL_4417575, EPI_ISL_4417576, EPI_ISL_4417577, EPI_ISL_4417578, EPI_ISL_4417579, EPI_ISL_4417580, EPI_ISL_4417581, EPI_ISL_4417582, EPI_ISL_4417583, EPI_ISL_4417584, EPI_ISL_4417585, EPI_ISL_4417586, EPI_ISL_4417587, EPI_ISL_4417588, EPI_ISL_4417589, EPI_ISL_4417590, EPI_ISL_4417591, EPI_ISL_4417592, EPI_ISL_4417593, EPI_ISL_4417594, EPI_ISL_4417595, EPI_ISL_4417596, EPI_ISL_4417597, EPI_ISL_4417598, EPI_ISL_4417600, EPI_ISL_4417612, EPI_ISL_4417614, EPI_ISL_4417616, EPI_ISL_4417617, EPI_ISL_4417620, EPI_ISL_4417623 | see above                                                  | LSP de Atlantico                                                                                                                            | Centro de Investigaciones en Microbiología y Biotecnología-UR (CIMBIUR), Facultad de Ciencias Naturales, Universidad del Rosario, Bogotá, Colombia                                                                                                                                                                                                                                                                                                                                                                                                                                                                                                                                                                                                                                                                                                                                                                                                                                                                                                                                                                                                                                                                                                                                                                                                                                                                                                                                                                                                                                                                                                                      | Angie Ramírez; Juan David Ramírez; Luz H. Patiño; Marcela Mercado-Reyes; Marina Muñoz; Nathalia Ballesteros; Nicolas Niño; Sergio Castañeda                                                                                                                                                                                                                                                                                                                                                                                                                                                                                                                                                                                                                                                                                                                                                                                                                                                                                                                                                                                                                                                                                                                                                                                                                                                                                                                                                                                                                                                                                                                                                          |
| EPI_ISL_3221205                                                                                                                                                                                                                                                                                                                                                                                                                                                                                                                                                                                                                                                                                                                                           | LSUHS Emerging Viral Threat Laboratory                     | LSUHS Emerging Viral Threat Laboratory                                                                                                      | Alexander Mijalis; Andrew D. Yurochko; Christopher G. Kevill; Gregory L. Ware; Jennifer L. Carroll; Jeremy P. Kamil; John A. Vanchiere; Maarten Van Diest; Rona S. Scott                                                                                                                                                                                                                                                                                                                                                                                                                                                                                                                                                                                                                                                                                                                                                                                                                                                                                                                                                                                                                                                                                                                                                                                                                                                                                                                                                                                                                                                                                                |                                                                                                                                                                                                                                                                                                                                                                                                                                                                                                                                                                                                                                                                                                                                                                                                                                                                                                                                                                                                                                                                                                                                                                                                                                                                                                                                                                                                                                                                                                                                                                                                                                                                                                      |
| EPI_ISL_4419176, EPI_ISL_4419177, EPI_ISL_4419178, EPI_ISL_4419179, EPI_ISL_4419180, EPI_ISL_4419181                                                                                                                                                                                                                                                                                                                                                                                                                                                                                                                                                                                                                                                      | Lab Christus Sinergia Salud - Clínica Farallones           | Universidad del Valle                                                                                                                       | Programa Nacional de Caracterización Genómica de SARS-CoV-2                                                                                                                                                                                                                                                                                                                                                                                                                                                                                                                                                                                                                                                                                                                                                                                                                                                                                                                                                                                                                                                                                                                                                                                                                                                                                                                                                                                                                                                                                                                                                                                                             |                                                                                                                                                                                                                                                                                                                                                                                                                                                                                                                                                                                                                                                                                                                                                                                                                                                                                                                                                                                                                                                                                                                                                                                                                                                                                                                                                                                                                                                                                                                                                                                                                                                                                                      |
| EPI_ISL_2657876                                                                                                                                                                                                                                                                                                                                                                                                                                                                                                                                                                                                                                                                                                                                           | Lab microbiología FVL                                      | Instituto Nacional de Salud- Dirección de Investigación en Salud Pública                                                                    | Carlos Franco-Muñoz; Carmen Osorio; Diana Malo; Diego A. Álvarez-Díaz; Diego Andrés Prada; Gerardo Santamaría; Hector Alejandro Ruiz-Moreno; Jhonnatan Reales-González; Jorge Rivera; Juan Camilo Martínez; Julian Naizaque; Katherine Laiton-Donato; Lisseth Pardo; Magdalena Wiesner; Marcela Mercado-Reyes; María T. Herrera-Sepúlveda; Marta Lopez Blanco; Martha Lucia Ospina Martínez; Paola Rojas; Sergio Gomez; Sheryll Corchuelo; Ángela Alarcon Cruz                                                                                                                                                                                                                                                                                                                                                                                                                                                                                                                                                                                                                                                                                                                                                                                                                                                                                                                                                                                                                                                                                                                                                                                                          |                                                                                                                                                                                                                                                                                                                                                                                                                                                                                                                                                                                                                                                                                                                                                                                                                                                                                                                                                                                                                                                                                                                                                                                                                                                                                                                                                                                                                                                                                                                                                                                                                                                                                                      |
| EPI_ISL_6442172                                                                                                                                                                                                                                                                                                                                                                                                                                                                                                                                                                                                                                                                                                                                           | Lab. Comfandi                                              | "Laboratorio de biotecnología, Universidad Icesi"                                                                                           | Adrián Camilo Rodríguez Ararat; Diana M. Florez Giraldo; Marcela Mercado; María F. Villegas Torres; María I. Gutiérrez López; Paola A. Caicedo Burbano; Programa Nacional de Caracterización Genómica de SARS-CoV-2; Sara González Henao                                                                                                                                                                                                                                                                                                                                                                                                                                                                                                                                                                                                                                                                                                                                                                                                                                                                                                                                                                                                                                                                                                                                                                                                                                                                                                                                                                                                                                |                                                                                                                                                                                                                                                                                                                                                                                                                                                                                                                                                                                                                                                                                                                                                                                                                                                                                                                                                                                                                                                                                                                                                                                                                                                                                                                                                                                                                                                                                                                                                                                                                                                                                                      |
| EPI_ISL_5797243, EPI_ISL_6121013, EPI_ISL_6121015, EPI_ISL_6121016, EPI_ISL_6121020, EPI_ISL_6121021, EPI_ISL_6121022, EPI_ISL_6121023, EPI_ISL_6121024, EPI_ISL_6121025, EPI_ISL_6121027, EPI_ISL_6121029                                                                                                                                                                                                                                                                                                                                                                                                                                                                                                                                                | see above                                                  | Lab. Comfandi                                                                                                                               | Laboratorio de biotecnología, Universidad Icesi                                                                                                                                                                                                                                                                                                                                                                                                                                                                                                                                                                                                                                                                                                                                                                                                                                                                                                                                                                                                                                                                                                                                                                                                                                                                                                                                                                                                                                                                                                                                                                                                                         | "María I. Gutiérrez López; Adrián Camilo Rodríguez Ararat; Diana M. Florez Giraldo; Marcela Mercado; María F. Villegas Torres; María I. Gutiérrez López; Paola A. Caicedo Burbano; Paola A. Caicedo Burbano"; Programa Nacional de Caracterización Genómica de SARS-CoV-2; Sara González Henao                                                                                                                                                                                                                                                                                                                                                                                                                                                                                                                                                                                                                                                                                                                                                                                                                                                                                                                                                                                                                                                                                                                                                                                                                                                                                                                                                                                                       |
| EPI_ISL_5195623, EPI_ISL_5195624, EPI_ISL_5195625, EPI_ISL_5195626, EPI_ISL_5195629, EPI_ISL_5887476, EPI_ISL_5887478, EPI_ISL_5887479                                                                                                                                                                                                                                                                                                                                                                                                                                                                                                                                                                                                                    | see above                                                  | Lab. Hospital clinico Universidad de Chile                                                                                                  | "Facultad de Ciencias de la Vida, UNAB"                                                                                                                                                                                                                                                                                                                                                                                                                                                                                                                                                                                                                                                                                                                                                                                                                                                                                                                                                                                                                                                                                                                                                                                                                                                                                                                                                                                                                                                                                                                                                                                                                                 | "Claudio Meneses; Ariel Orellana"; Claudio Olmos; Daniel Leon; Dayan Sanhueza; Eduardo Castro; Gonzalo Campaña; Macarena Bastias; Paola Pidal; Ricardo Yusta; Sebastian Wolter; Susana Saez; Víctor Monreal; Waldo Diaz                                                                                                                                                                                                                                                                                                                                                                                                                                                                                                                                                                                                                                                                                                                                                                                                                                                                                                                                                                                                                                                                                                                                                                                                                                                                                                                                                                                                                                                                              |
| EPI_ISL_2158355                                                                                                                                                                                                                                                                                                                                                                                                                                                                                                                                                                                                                                                                                                                                           | Lab. Virología y Genética Universidad Simón Bolívar        | Instituto Nacional de Salud- Dirección de Investigación en Salud Pública                                                                    | Carlos Franco-Muñoz; Carmen Osorio; Diana Malo; Diego A. Álvarez-Díaz; Diego Andrés Prada; Gerardo Santamaría; Hector Alejandro Ruiz-Moreno; Jhonnatan Reales-González; Jorge Rivera; Juan Camilo Martínez; Julian Naizaque; Katherine Laiton-Donato; Lisseth Pardo; Magdalena Wiesner; Marcela Mercado-Reyes; María T. Herrera-Sepúlveda; Marta Lopez Blanco; Martha Lucia Ospina Martínez; Paola Rojas; Sergio Gomez; Sheryll Corchuelo; Ángela Alarcon Cruz                                                                                                                                                                                                                                                                                                                                                                                                                                                                                                                                                                                                                                                                                                                                                                                                                                                                                                                                                                                                                                                                                                                                                                                                          |                                                                                                                                                                                                                                                                                                                                                                                                                                                                                                                                                                                                                                                                                                                                                                                                                                                                                                                                                                                                                                                                                                                                                                                                                                                                                                                                                                                                                                                                                                                                                                                                                                                                                                      |
| EPI_ISL_4412226, EPI_ISL_4412229, EPI_ISL_4412231                                                                                                                                                                                                                                                                                                                                                                                                                                                                                                                                                                                                                                                                                                         | Labo Analyses Med                                          | National Reference Center for Viruses of Respiratory Infections, Institut Pasteur, Paris                                                    | Angela Brisebarre; Camille Capel; Christophe Malabat; Corinne Chauvet; Corinne Maufrais; Etienne Simon-Lorière; Frédéric Lemoine; Julien Fumey; Louise Lefrançois; Marion Barbet; Maud Vanpeene; Méline Bizard; Slim El Khari; Sylvie Behillili; Sylvie Van der Werf; Vincent Enouf                                                                                                                                                                                                                                                                                                                                                                                                                                                                                                                                                                                                                                                                                                                                                                                                                                                                                                                                                                                                                                                                                                                                                                                                                                                                                                                                                                                     |                                                                                                                                                                                                                                                                                                                                                                                                                                                                                                                                                                                                                                                                                                                                                                                                                                                                                                                                                                                                                                                                                                                                                                                                                                                                                                                                                                                                                                                                                                                                                                                                                                                                                                      |
| EPI_ISL_2466775, EPI_ISL_2466824, EPI_ISL_2694812                                                                                                                                                                                                                                                                                                                                                                                                                                                                                                                                                                                                                                                                                                         | Gomb Berlin Charité Vivantes GmbH / Institut für Virologie | Charité Universitätsmedizin Berlin, Institut für Virologie/Labor Berlin                                                                     | Barbara Mühlemann; Christian Drosten; Christine Stephan; Peter Menzel; Rolf Schwarzer; Terry Jones; Victor M Corman                                                                                                                                                                                                                                                                                                                                                                                                                                                                                                                                                                                                                                                                                                                                                                                                                                                                                                                                                                                                                                                                                                                                                                                                                                                                                                                                                                                                                                                                                                                                                     |                                                                                                                                                                                                                                                                                                                                                                                                                                                                                                                                                                                                                                                                                                                                                                                                                                                                                                                                                                                                                                                                                                                                                                                                                                                                                                                                                                                                                                                                                                                                                                                                                                                                                                      |
| EPI_ISL_2111528, EPI_ISL_2111598                                                                                                                                                                                                                                                                                                                                                                                                                                                                                                                                                                                                                                                                                                                          | Labor ZOTZ/KLIMAS; MVZ Dusseldorf-Centrum                  | Robert Koch Institute                                                                                                                       |                                                                                                                                                                                                                                                                                                                                                                                                                                                                                                                                                                                                                                                                                                                                                                                                                                                                                                                                                                                                                                                                                                                                                                                                                                                                                                                                                                                                                                                                                                                                                                                                                                                                         |                                                                                                                                                                                                                                                                                                                                                                                                                                                                                                                                                                                                                                                                                                                                                                                                                                                                                                                                                                                                                                                                                                                                                                                                                                                                                                                                                                                                                                                                                                                                                                                                                                                                                                      |
| EPI_ISL_2636058, EPI_ISL_2678752                                                                                                                                                                                                                                                                                                                                                                                                                                                                                                                                                                                                                                                                                                                          | Labor ZOTZ/KLIMAS; MVZ Dusseldorf-Centrum                  | Robert Koch Institute                                                                                                                       |                                                                                                                                                                                                                                                                                                                                                                                                                                                                                                                                                                                                                                                                                                                                                                                                                                                                                                                                                                                                                                                                                                                                                                                                                                                                                                                                                                                                                                                                                                                                                                                                                                                                         |                                                                                                                                                                                                                                                                                                                                                                                                                                                                                                                                                                                                                                                                                                                                                                                                                                                                                                                                                                                                                                                                                                                                                                                                                                                                                                                                                                                                                                                                                                                                                                                                                                                                                                      |
| EPI_ISL_4028962, EPI_ISL_4028964, EPI_ISL_4028966, EPI_ISL_4028973, EPI_ISL_4028977, EPI_ISL_4028981                                                                                                                                                                                                                                                                                                                                                                                                                                                                                                                                                                                                                                                      | Laboratoire National de Santé Publique - LNSP              | Genomics and Proteomics Department, Gorgas Memorial Institute For Health Studies                                                            | Alexander A Martinez; Ambar Moreno; Claudia Estrada; Claudia Gonzalez V; César Roberto Conde Pereira; Jessica Gondola; Leyda Abrego; Marlene Castillo; Melissa Gaitan; Oris Chavarria                                                                                                                                                                                                                                                                                                                                                                                                                                                                                                                                                                                                                                                                                                                                                                                                                                                                                                                                                                                                                                                                                                                                                                                                                                                                                                                                                                                                                                                                                   |                                                                                                                                                                                                                                                                                                                                                                                                                                                                                                                                                                                                                                                                                                                                                                                                                                                                                                                                                                                                                                                                                                                                                                                                                                                                                                                                                                                                                                                                                                                                                                                                                                                                                                      |
| EPI_ISL_5422240, EPI_ISL_5897949, EPI_ISL_5897950, EPI_ISL_5897953, EPI_ISL_5898098                                                                                                                                                                                                                                                                                                                                                                                                                                                                                                                                                                                                                                                                       | Laboratoire de santé publique du Québec                    | Laboratoire de santé publique du Québec                                                                                                     | Guillaume Bourque; Ioannis Ragoussis; Jesse Shapiro; Mark Lathrop and Michel Roger on behalf of the CoVSeq research group; Sandrine Moreira                                                                                                                                                                                                                                                                                                                                                                                                                                                                                                                                                                                                                                                                                                                                                                                                                                                                                                                                                                                                                                                                                                                                                                                                                                                                                                                                                                                                                                                                                                                             |                                                                                                                                                                                                                                                                                                                                                                                                                                                                                                                                                                                                                                                                                                                                                                                                                                                                                                                                                                                                                                                                                                                                                                                                                                                                                                                                                                                                                                                                                                                                                                                                                                                                                                      |
| EPI_ISL_4560897                                                                                                                                                                                                                                                                                                                                                                                                                                                                                                                                                                                                                                                                                                                                           | Laboratori de Referència de Catalunya                      | SeqCOVID-SPAIN consortium/IBV(CSIC)                                                                                                         | Aida Esperanza Ramirez Marinero; Alba Vilas Basil; Eduardo Padilla León; Mireia Canal Aranda and SeqCOVID-SPAIN consortium                                                                                                                                                                                                                                                                                                                                                                                                                                                                                                                                                                                                                                                                                                                                                                                                                                                                                                                                                                                                                                                                                                                                                                                                                                                                                                                                                                                                                                                                                                                                              |                                                                                                                                                                                                                                                                                                                                                                                                                                                                                                                                                                                                                                                                                                                                                                                                                                                                                                                                                                                                                                                                                                                                                                                                                                                                                                                                                                                                                                                                                                                                                                                                                                                                                                      |
| EPI_ISL_4946235, EPI_ISL_4946236, EPI_ISL_4946237, EPI_ISL_4946238, EPI_ISL_4946239, EPI_ISL_4946240, EPI_ISL_4946241, EPI_ISL_4946242, EPI_ISL_4946246, EPI_ISL_4946247                                                                                                                                                                                                                                                                                                                                                                                                                                                                                                                                                                                  | see above                                                  | Laboratorio Angel ( Synlab)                                                                                                                 | Instituto Nacional de Salud- Dirección de Investigación en Salud Pública                                                                                                                                                                                                                                                                                                                                                                                                                                                                                                                                                                                                                                                                                                                                                                                                                                                                                                                                                                                                                                                                                                                                                                                                                                                                                                                                                                                                                                                                                                                                                                                                | Carlos Franco-Muñoz; Carmen Osorio; Diana Malo; Diego A. Álvarez-Díaz; Diego Andrés Prada; Gerardo Santamaría; Hector Alejandro Ruiz-Moreno; Jhonnatan Reales-González; Jorge Rivera; Juan Camilo Martínez; Julian Naizaque; Katherine Laiton-Donato; Lisseth Pardo; Magdalena Wiesner; Marcela Mercado-Reyes; María T. Herrera-Sepúlveda; Marta Lopez Blanco; Martha Lucia Ospina Martínez; Paola Rojas; Sergio Gomez; Sheryll Corchuelo; Ángela Alarcon Cruz                                                                                                                                                                                                                                                                                                                                                                                                                                                                                                                                                                                                                                                                                                                                                                                                                                                                                                                                                                                                                                                                                                                                                                                                                                       |
| EPI_ISL_4963407, EPI_ISL_4963411, EPI_ISL_4963416, EPI_ISL_4963422, EPI_ISL_4963428, EPI_ISL_4963431                                                                                                                                                                                                                                                                                                                                                                                                                                                                                                                                                                                                                                                      | Laboratorio COLCAN                                         | Laboratorio de biotecnología, Universidad Icesi                                                                                             | Diana M. Florez Galindo; Marcela Mercado; María F. Villegas Torres; María I. Gutierrez Lopez; Paola A. Caicedo Burbano; Programa Nacional de Caracterización Genómica de SARS-CoV-2; Sara Gonzalez                                                                                                                                                                                                                                                                                                                                                                                                                                                                                                                                                                                                                                                                                                                                                                                                                                                                                                                                                                                                                                                                                                                                                                                                                                                                                                                                                                                                                                                                      |                                                                                                                                                                                                                                                                                                                                                                                                                                                                                                                                                                                                                                                                                                                                                                                                                                                                                                                                                                                                                                                                                                                                                                                                                                                                                                                                                                                                                                                                                                                                                                                                                                                                                                      |
| EPI_ISL_3568790, EPI_ISL_3568791, EPI_ISL_3568792, EPI_ISL_3568793, EPI_ISL_3568794, EPI_ISL_3568832, EPI_ISL_3568833, EPI_ISL_3568835, EPI_ISL_3568836, EPI_ISL_3568837                                                                                                                                                                                                                                                                                                                                                                                                                                                                                                                                                                                  | see above                                                  | Laboratorio Central de Epidemiologia (LCE)                                                                                                  | Unidad de Genomica Avanzada                                                                                                                                                                                                                                                                                                                                                                                                                                                                                                                                                                                                                                                                                                                                                                                                                                                                                                                                                                                                                                                                                                                                                                                                                                                                                                                                                                                                                                                                                                                                                                                                                                             | ; Alejandra García-Gasca; Alejandra Hernández-Terán; Alejandro Sanchez-Flores; Alfredo Herrera-Estrella; Alicia Ocaña-Mondragón; Andreu Comas-García; Angel Gustavo Salas-Lais; Antonio Loza Roman; Bernardo Martínez-Miguel; Blanca Taboada; Brenda Irasema Maldonado-Meza; Bruno Gomez-Gil; Carla Ivon Herrera-Najera; Carlos F. Arias; Celia Boukadida; Clara Esperanza Santacruz-Tinoco; Concepción Grajales-Muñiz; Consorcio Mexicano de Vigilancia Genómica (CoVIGen-Mex). Authors (in alphabetical order): Julio Elias Alvarado-Yaah; Cristóbal Cháidez-Quiroz; Daniel Fregoso-Rueda; Daniel Lira Morales; Eduardo Becerril-Vargas; Fernando Fontove-Herrera; Fidencio Mejía-Nepomuceno; Francisco Pulido; Gloria Elena Espinosa-Ayala; Gloria María Molina-Salinas; Gloria Vazquez; Hector Esteban Paz-Juarez; Hector Montoya-Fuentes; Helen Haydee Fernanda Ramirez-Plascencia; Irvin Gonzalez-Lopez; Jean Pierre Gonzalez; Jesus Hernandez; Joel Armando Vazquez-Pérez.; Jorge Salas-Hernández; Jose Antonio Enciso-Moreno; Jose Arturo Martínez-Orozco; Jose Esteban Muñoz-Medina; Jose de Jesus Nuñez-Contreras; Juan Bautista Chale-Dzul; Julissa Enciso-Ibarra; Luis Alberto Ochoa-Carrera; Margarita Matias-Florentino; María Guadalupe Santiago-Mauricio; María Guadalupe de Jesús Mireles-Rivera; Mario Mujica-Sanchez; Marissa Perez-Garcia; Nelly Selem-Mojica; Pavel Isa; Ricardo Ciria Merce; Ricardo Grande; Rosa María Gutiérrez Rios; Santiago avila-Rios; Selene Zárate; Susana Lopez; Veronica Mata-Haro; Victor Eduardo García-Arias; Victor Hugo Borja-Aburto                                                                                                            |
| EPI_ISL_5332883                                                                                                                                                                                                                                                                                                                                                                                                                                                                                                                                                                                                                                                                                                                                           | Laboratorio Central de Epidemiologia (LCE)                 | Unidad de Genomica Avanzada                                                                                                                 | ; Alejandra García-Gasca; Alejandra Hernández-Terán; Alejandro Sanchez-Flores; Alfredo Herrera-Estrella; Alicia Ocaña-Mondragón; Andreu Comas-García; Angel Gustavo Salas-Lais; Antonio Loza Roman; Bernardo Martínez-Miguel; Blanca Taboada; Brenda Irasema Maldonado-Meza; Bruno Gomez-Gil; Carla Ivon Herrera-Najera; Carlos F. Arias; Celia Boukadida; Clara Esperanza Santacruz-Tinoco; Concepción Grajales-Muñiz; Consorcio Mexicano de Vigilancia Genómica (CoVIGen-Mex). Authors (in alphabetical order): Julio Elias Alvarado-Yaah; Cristóbal Cháidez-Quiroz; Célida Duque Molina; Célida Martínez- Rodríguez; Daniel Fregoso-Rueda; Daniel Lira Morales; Eduardo Becerril-Vargas; Fernando Fontove-Herrera; Fidencio Mejía-Nepomuceno; Francisco Pulido; Gloria Elena Espinosa-Ayala; Gloria María Molina-Salinas; Gloria Vazquez; Hector Esteban Paz-Juarez; Hector Montoya-Fuentes; Helen Haydee Fernanda Ramirez-Plascencia; Irvin Gonzalez-Lopez; Jean Pierre Gonzalez; Jesus Hernandez; Joel Armando Vazquez-Pérez.; Jorge Salas-Hernández; Jose Antonio Enciso-Moreno; José Arturo Martínez-Orozco; Jose Esteban Muñoz-Medina; Jose de Jesús Nuñez-Contreras; Juan Bautista Chale-Dzul; Julissa Enciso-Ibarra; Kathia Elizabeth Tapia-Diaz; Luis Alberto Ochoa-Carrera; Margarita Matias-Florentino; Mario Mujica-Sánchez; Marissa Perez-Garcia; María Guadalupe Santiago-Mauricio; María Guadalupe de Jesús Mireles-Rivera; Nelly Selem-Mojica; Pavel Isa; Ricardo Ciria Merce; Ricardo Grande; Rosa María Gutiérrez Rios; Santiago Avila-Rios; Selene Zárate; Susana Lopez; Verónica Mata-Haro; Victor Eduardo García-Arias; Victor Hugo Borja-Aburto |                                                                                                                                                                                                                                                                                                                                                                                                                                                                                                                                                                                                                                                                                                                                                                                                                                                                                                                                                                                                                                                                                                                                                                                                                                                                                                                                                                                                                                                                                                                                                                                                                                                                                                      |
| EPI_ISL_3155510, EPI_ISL_3155516, EPI_ISL_3155519, EPI_ISL_3155556, EPI_ISL_3155559, EPI_ISL_3155645, EPI_ISL_3557021, EPI_ISL_3557115, EPI_ISL_3557163                                                                                                                                                                                                                                                                                                                                                                                                                                                                                                                                                                                                   | see above                                                  | Laboratorio Central de Epidemiologia (LCE)                                                                                                  | Centro de Investigación en Enfermedades Infecciosas (CIENI), Instituto Nacional de Enfermedades Respiratorias (INER)                                                                                                                                                                                                                                                                                                                                                                                                                                                                                                                                                                                                                                                                                                                                                                                                                                                                                                                                                                                                                                                                                                                                                                                                                                                                                                                                                                                                                                                                                                                                                    | ; Alejandra García-Gasca; Alejandra Hernández-Terán; Alejandro Sanchez-Flores; Alfredo Herrera-Estrella; Alicia Ocaña-Mondragón; Andreu Comas-García; Angel Gustavo Salas-Lais; Antonio Loza Román; Bernardo Martínez-Miguel; Blanca Taboada; Brenda Irasema Maldonado-Meza; Bruno Gómez-Gil; Carla Ivón Herrera-Najera; Carlos F. Arias; Celia Boukadida; Clara Esperanza Santacruz-Tinoco; Concepción Grajales-Muñiz; Consorcio Mexicano de Vigilancia Genómica (CoVIGen-Mex). Authors (in alphabetical order): Julio Elias Alvarado-Yaah; Cristóbal Cháidez-Quiroz; Célida Duque Molina; Célida Martínez- Rodríguez; Daniel Fregoso-Rueda; Daniel Lira Morales; Eduardo Becerril-Vargas; Fernando Fontove-Herrera; Fidencio Mejía-Nepomuceno; Francisco Pulido; Gloria Elena Espinosa-Ayala; Gloria María Molina-Salinas; Gloria Vazquez; Hector Esteban Paz-Juarez; Hector Montoya-Fuentes; Helen Haydee Fernanda Ramirez-Plascencia; Irvin Gonzalez-Lopez; Jean Pierre Gonzalez; Jesús Hernández; Joel Armando Vázquez-Pérez.; Joel Armando Vázquez-Pérez.; Jorge Salas-Hernández; José Antonio Enciso-Moreno; José Arturo Martínez-Orozco; Jose Esteban Muñoz-Medina; José de Jesús Nuñez-Contreras; Juan Bautista Chale-Dzul; Julissa Enciso-Ibarra; Kathia Elizabeth Tapia-Diaz; Luis Alberto Ochoa-Carrera; Margarita Matias-Florentino; Mario Mujica-Sánchez; Marissa Perez-Garcia; María Guadalupe Santiago-Mauricio; María Guadalupe de Jesús Mireles-Rivera; Nelly Selem-Mojica; Pavel Isa; Ricardo Ciria Merce; Ricardo Grande; Rosa María Gutiérrez Rios; Santiago Avila-Rios; Selene Zárate; Susana Lopez; Verónica Mata-Haro; Victor Eduardo García-Arias; Victor Hugo Borja-Aburto |
| EPI_ISL_3133779, EPI_ISL_3133782, EPI_ISL_3355575, EPI_ISL_3355576, EPI_ISL_3355578, EPI_ISL_3355587, EPI_ISL_4006547                                                                                                                                                                                                                                                                                                                                                                                                                                                                                                                                                                                                                                     | see above                                                  | Laboratorio Central de Epidemiologia (LCE)                                                                                                  | Instituto de Biotecnología de la UNAM                                                                                                                                                                                                                                                                                                                                                                                                                                                                                                                                                                                                                                                                                                                                                                                                                                                                                                                                                                                                                                                                                                                                                                                                                                                                                                                                                                                                                                                                                                                                                                                                                                   | ; Alejandra García-Gasca; Alejandra Hernández-Terán; Alejandro Sánchez-Flores; Alfredo Herrera-Estrella; Alicia Ocaña-Mondragón; Andreu Comas-García; Angel Gustavo Salas-Lais; Antonio Loza Román; Bernardo Martínez-Miguel; Blanca Taboada; Brenda Irasema Maldonado-Meza; Bruno Gómez-Gil; Carla Ivón Herrera-Najera; Carlos F. Arias; Celia Boukadida; Clara Esperanza Santacruz-Tinoco; Concepción Grajales-Muñiz; Consorcio Mexicano de Vigilancia Genómica (CoVIGen-Mex). Authors (in alphabetical order): Julio Elias Alvarado-Yaah; Cristóbal Cháidez-Quiroz; Célida Duque Molina; Célida Martínez- Rodríguez; Daniel Fregoso-Rueda; Daniel Lira Morales; Eduardo Becerril-Vargas; Fernando Fontove-Herrera; Fidencio Mejía-Nepomuceno; Francisco Pulido; Gloria Elena Espinosa-Ayala; Gloria María Molina-Salinas; Gloria Vazquez; Hector Esteban Paz-Juarez; Hector Montoya-Fuentes; Helen Haydee Fernanda Ramirez-Plascencia; Irvin Gonzalez-Lopez; Jean Pierre Gonzalez; Jesús Hernández; Joel Armando Vázquez-Pérez.; Joel Armando Vázquez-Pérez.; Jorge Salas-Hernández; José Antonio Enciso-Moreno; José Arturo Martínez-Orozco; Jose Esteban Muñoz-Medina; José de Jesús Nuñez-Contreras; Juan Bautista Chale-Dzul; Julissa Enciso-Ibarra; Kathia Elizabeth Tapia-Diaz; Luis Alberto Ochoa-Carrera; Margarita Matias-Florentino; Mario Mujica-Sánchez; Marissa Perez-Garcia; María Guadalupe Santiago-Mauricio; María Guadalupe de Jesús Mireles-Rivera; Nelly Selem-Mojica; Pavel Isa; Ricardo Ciria Merce; Ricardo Grande; Rosa María Gutiérrez Rios; Santiago Avila-Rios; Selene Zárate; Susana Lopez; Verónica Mata-Haro; Victor Eduardo García-Arias; Victor Hugo Borja-Aburto |
| EPI_ISL_6155758, EPI_ISL_6155762, EPI_ISL_6155769, EPI_ISL_6155775                                                                                                                                                                                                                                                                                                                                                                                                                                                                                                                                                                                                                                                                                        | Laboratorio Central, Ministerio de Salud Córdoba           | Instituto de Patología Vegetal (CIAP-INTA) on behalf of 'Proyecto Argentino Interinstitucional de genómica de SARS-CoV-2' (PAIS Consortium) | A; Amadio; Barbas, G.; Castro, G.; Debat, HJ.; FD; Fernández; Irazoqui; M; M.B.; Marquez, N.; Pisano; Re, V.                                                                                                                                                                                                                                                                                                                                                                                                                                                                                                                                                                                                                                                                                                                                                                                                                                                                                                                                                                                                                                                                                                                                                                                                                                                                                                                                                                                                                                                                                                                                                            |                                                                                                                                                                                                                                                                                                                                                                                                                                                                                                                                                                                                                                                                                                                                                                                                                                                                                                                                                                                                                                                                                                                                                                                                                                                                                                                                                                                                                                                                                                                                                                                                                                                                                                      |
| EPI_ISL_4417559, EPI_ISL_4417560, EPI_ISL_4417561, EPI_ISL_4417581, EPI_ISL_4417601, EPI_ISL_4417602, EPI_ISL_4417603, EPI_ISL_4417604, EPI_ISL_4417605, EPI_ISL_4417606, EPI_ISL_4417607, EPI_ISL_4417608, EPI_ISL_4417609, EPI_ISL_4417610, EPI_ISL_4417611, EPI_ISL_4417615, EPI_ISL_4417619, EPI_ISL_4417622                                                                                                                                                                                                                                                                                                                                                                                                                                          | see above                                                  | Laboratorio Clinica Iberoamericana (Sanitas)                                                                                                | Centro de Investigaciones en Microbiología y Biotecnología-UR (CIMBIUR), Facultad de Ciencias Naturales, Universidad del Rosario,                                                                                                                                                                                                                                                                                                                                                                                                                                                                                                                                                                                                                                                                                                                                                                                                                                                                                                                                                                                                                                                                                                                                                                                                                                                                                                                                                                                                                                                                                                                                       | Angie Ramírez; Juan David Ramírez; Luz H. Patiño; Marcela Mercado-Reyes; Marina Muñoz; Nathalia Ballesteros; Nicolas Niño; Sergio Castañeda                                                                                                                                                                                                                                                                                                                                                                                                                                                                                                                                                                                                                                                                                                                                                                                                                                                                                                                                                                                                                                                                                                                                                                                                                                                                                                                                                                                                                                                                                                                                                          |

|                                                                                                                                                                                                                                                                                                                                                                                                                                                                                                                                                                                 |                                                                                                                    |                                                                                                                                                                                                 |                                                                                                                                                                                                                                                                                                                                                                                                                                                                                                |
|---------------------------------------------------------------------------------------------------------------------------------------------------------------------------------------------------------------------------------------------------------------------------------------------------------------------------------------------------------------------------------------------------------------------------------------------------------------------------------------------------------------------------------------------------------------------------------|--------------------------------------------------------------------------------------------------------------------|-------------------------------------------------------------------------------------------------------------------------------------------------------------------------------------------------|------------------------------------------------------------------------------------------------------------------------------------------------------------------------------------------------------------------------------------------------------------------------------------------------------------------------------------------------------------------------------------------------------------------------------------------------------------------------------------------------|
| EPI_ISL_4704058, EPI_ISL_4704080                                                                                                                                                                                                                                                                                                                                                                                                                                                                                                                                                | Laboratorio Clínico CITSALUD                                                                                       | Bogotá, Colombia<br>Laboratorio de Biología Molecular, Universidad Cooperativa de Colombia, Santa Marta                                                                                         | Andrew S. Muñoz-Gamba; Daniel B. Ramírez-Osorio; José A. Usme-Ciro; María J. Capmartin; Paula A. Quintero-Cortés; Robinson Álvarez                                                                                                                                                                                                                                                                                                                                                             |
| EPI_ISL_4219515, EPI_ISL_4219516, EPI_ISL_4219517, EPI_ISL_4219518, EPI_ISL_4219519                                                                                                                                                                                                                                                                                                                                                                                                                                                                                             | Laboratorio Clínica Colsanitas Medellín                                                                            | Molecular Genetics and Antimicrobial Resistance - UGRA, Universidad El Bosque                                                                                                                   | Catalina Espitia; Jinnethe Reyes; Lorena Diaz; Marcela Mercado; Mauricio Pacheco; Rafael Rios; Valentina Martinez                                                                                                                                                                                                                                                                                                                                                                              |
| EPI_ISL_4197218, EPI_ISL_4197219, EPI_ISL_4197221, EPI_ISL_4197222, EPI_ISL_4197223, EPI_ISL_4197224, EPI_ISL_4197225, EPI_ISL_4197229, EPI_ISL_4197234, EPI_ISL_4197236, EPI_ISL_4197237, EPI_ISL_4197239, EPI_ISL_4197241, EPI_ISL_4197244, EPI_ISL_4197245, EPI_ISL_4197248, EPI_ISL_4197254, EPI_ISL_4197255, EPI_ISL_4197256, EPI_ISL_4197257, EPI_ISL_4197260                                                                                                                                                                                                             | see above<br>Laboratorio Clínico Analizar                                                                          | Gencore - Universidad de los Andes                                                                                                                                                              | Cristian Barrera; David González; Gabriela Ariza; Luisa Sacristan; Marcela Guevara; Marcela Mercado; Silvia Restrepo                                                                                                                                                                                                                                                                                                                                                                           |
| EPI_ISL_4207317, EPI_ISL_5103736, EPI_ISL_5103737                                                                                                                                                                                                                                                                                                                                                                                                                                                                                                                               | Laboratorio Clínico BioReferencia                                                                                  | Corporación para Investigaciones Biológicas-CIB                                                                                                                                                 | Jeanneth Mosquera Rendon; Jenny Santiago Cuesta; Katterine Molina Hoyos; Marcela Mercado Reyes; Uriel A. Hurtado Paez                                                                                                                                                                                                                                                                                                                                                                          |
| EPI_ISL_4103921                                                                                                                                                                                                                                                                                                                                                                                                                                                                                                                                                                 | Laboratorio Clínico Hospital del Cobre, Calama, Región de Antofagasta.                                             | Laboratorio de Genómica Microbiana, Unidad de Bioquímica, Departamento Biomédico, Facultad de Ciencias de la Salud, Universidad de Antofagasta, Chile.                                          | Alexander Pérez; Alexandra Galetović; Benito Gómez-Silva; Camila Salazar-Ardiles; Carlos Cornejo.; Gabriel Peña; Jorge Araya; Martín Vargas; Milton Urrutia                                                                                                                                                                                                                                                                                                                                    |
| EPI_ISL_5146261, EPI_ISL_5146262, EPI_ISL_5146268, EPI_ISL_5146269, EPI_ISL_5146271, EPI_ISL_5146276, EPI_ISL_5146277                                                                                                                                                                                                                                                                                                                                                                                                                                                           | see above<br>Laboratorio Departamental de Salud del Quindío                                                        | Laboratorio de Biología Molecular y Biotecnología - Universidad Tecnológica de Pereira                                                                                                          | Augusto Zuluaga-Velez; Fredy A. Tabares-Villa; Juan C. Sepulveda; Juan D. Anacona-Montilla; Marcela Orjuela-Rodríguez                                                                                                                                                                                                                                                                                                                                                                          |
| EPI_ISL_5063044, EPI_ISL_5063045, EPI_ISL_5063046, EPI_ISL_5063048, EPI_ISL_5063050, EPI_ISL_5063051, EPI_ISL_5063052, EPI_ISL_5063053, EPI_ISL_5063054, EPI_ISL_5063055, EPI_ISL_5063056, EPI_ISL_5063057, EPI_ISL_5063058, EPI_ISL_5063059, EPI_ISL_5063060, EPI_ISL_5063061, EPI_ISL_5063062, EPI_ISL_5063063, EPI_ISL_5063064, EPI_ISL_5063065, EPI_ISL_5063067                                                                                                                                                                                                             | see above<br>Laboratorio Direccion Sanidad Policia Nacional                                                        | Centro de Investigaciones en Microbiología y Biotecnología-UR (CIMBIUR), Facultad de Ciencias Naturales, Universidad del Rosario, Bogotá, Colombia                                              | Angie Ramírez; Juan David Ramírez; Luz H. Patiño; Marcela Mercado-Reyes; Marina Muñoz; Nathalia Ballesteros; Nicolas Niño; Sergio Castañeda                                                                                                                                                                                                                                                                                                                                                    |
| EPI_ISL_4984847, EPI_ISL_4984907, EPI_ISL_4984908, EPI_ISL_4984909                                                                                                                                                                                                                                                                                                                                                                                                                                                                                                              | Laboratorio Docente Asistencial                                                                                    | Laboratorio Departamental de Salud Publica de Antioquia                                                                                                                                         | Andres F. Cardona-Rios; Cristian Arbey Velarde Hoyos; Gloria Isabel Escobar; Idabely Betancur Ortiz; Juan P. Hernandez-Ortiz; María Stella López                                                                                                                                                                                                                                                                                                                                               |
| EPI_ISL_5199331                                                                                                                                                                                                                                                                                                                                                                                                                                                                                                                                                                 | Laboratorio Echavarría                                                                                             | Instituto Nacional de Salud- Dirección de Investigación en Salud Pública                                                                                                                        | Beatriz de Arco; Carlos Franco-Muñoz; Carmen Osorio; Diana Malo; Diego A. Álvarez-Díaz; Diego Andrés Prada; Gerardo Santamaría; Hector Alejandro Ruiz-Moreno; Jhonnatan Reales-González; Jorge Rivera; Juan Camilo Martínez; Julian Naizaque; Katherine Laiton-Donato; Lisseth Pardo; Magdalena Wiesner; Marcela Mercado-Reyes; Maria T. Herrera-Sepúlveda; Marta Lopez Blanco; Martha Lucia Ospina Martínez; Paola Rojas; Sergio Gomez; Sheryll Corchuelo; Tatiana Cobos; Ángela Alarcon Cruz |
| EPI_ISL_2361500, EPI_ISL_2361501                                                                                                                                                                                                                                                                                                                                                                                                                                                                                                                                                | Laboratorio HUB -Azienda Ospedaliero Universitaria - AOU - Cagliari                                                | Laboratorio SPOKE Biologia Molecolare - Azienda Ospedaliero Universitaria - AOU - Cagliari                                                                                                      | Alessandra Scano; Ferdinando Coghe; Germano Orrù; Miriam Loddio; Riccardo Cappai; Sara Fais; Valentina Medda                                                                                                                                                                                                                                                                                                                                                                                   |
| EPI_ISL_4219520, EPI_ISL_4219521                                                                                                                                                                                                                                                                                                                                                                                                                                                                                                                                                | Laboratorio IMAT Instituto médico de alta tecnologia S.A.S                                                         | Molecular Genetics and Antimicrobial Resistance - UGRA, Universidad El Bosque                                                                                                                   | Catalina Espitia; Jinnethe Reyes; Lorena Diaz; Marcela Mercado; Mauricio Pacheco; Rafael Rios; Valentina Martinez                                                                                                                                                                                                                                                                                                                                                                              |
| EPI_ISL_4207310, EPI_ISL_4207314, EPI_ISL_4207336, EPI_ISL_5737545                                                                                                                                                                                                                                                                                                                                                                                                                                                                                                              | Laboratorio Las Américas                                                                                           | Corporación para Investigaciones Biológicas-CIB                                                                                                                                                 | Jeanneth Mosquera Rendon; Katterine Molina Hoyos; Marcela Mercado Reyes; Uriel A. Hurtado Paez                                                                                                                                                                                                                                                                                                                                                                                                 |
| EPI_ISL_3045384, EPI_ISL_3045395, EPI_ISL_3045396, EPI_ISL_3045397, EPI_ISL_3045398, EPI_ISL_3045400, EPI_ISL_3045406, EPI_ISL_3045410, EPI_ISL_3045417, EPI_ISL_3045422                                                                                                                                                                                                                                                                                                                                                                                                        | see above<br>Laboratorio Nacional de Salud Pública Dr. Defilló - LNSPDD                                            | Laboratory of Respiratory Viruses and Measles, Oswaldo Cruz Institute, FIOCRUZ                                                                                                                  | Alice Sampaio Rocha; Ana Carolina Mendonca; Anna Carolina Paixao; Elisa Cavalcante Pereira; Fernando Motta; Grey Benoit Vasquez; Isaac Miguel Sanchez; Ivonne Imbert; Lucía de la Cruz; Luciana Appolinario; Marilda Siqueira on behalf of the Fiocruz COVID-19 Genomic Surveillance Network; Nury de Castro; Paola Resende; Renata Serrano Lopes; Ronald Skewes; Taina Venas                                                                                                                  |
| EPI_ISL_4029328, EPI_ISL_4029329                                                                                                                                                                                                                                                                                                                                                                                                                                                                                                                                                | Laboratorio Nacional de Salud, Ministerio de Salud Publica y Asistencia Social                                     | Genomics and Proteomics Department, Gorgas Memorial Institute For Health Studies                                                                                                                | Alexander A Martinez; Ambar Moreno; Claudia Estrada; Claudia Gonzalez V; César Roberto Conde Pereira; Jessica Gondola; Leyda Abrego; Marlene Castillo; Melissa Gaitan; Oris Chavarria                                                                                                                                                                                                                                                                                                          |
| EPI_ISL_4207325, EPI_ISL_4207326                                                                                                                                                                                                                                                                                                                                                                                                                                                                                                                                                | Laboratorio Prime Diagnostics                                                                                      | Corporación para Investigaciones Biológicas-CIB                                                                                                                                                 | Jeanneth Mosquera Rendon; Katterine Molina Hoyos; Marcela Mercado Reyes; Uriel A. Hurtado Paez                                                                                                                                                                                                                                                                                                                                                                                                 |
| EPI_ISL_3332698, EPI_ISL_3332699, EPI_ISL_5103733, EPI_ISL_5103734, EPI_ISL_5103735, EPI_ISL_5103738, EPI_ISL_5103739, EPI_ISL_5103740, EPI_ISL_5103741, EPI_ISL_5103742, EPI_ISL_5103743, EPI_ISL_5103744, EPI_ISL_5103745, EPI_ISL_5103746                                                                                                                                                                                                                                                                                                                                    | see above<br>Laboratorio SYNLAB Colombia                                                                           | Corporación para Investigaciones Biológicas-CIB                                                                                                                                                 | Jeanneth Mosquera Rendon; Jenny Santiago Cuesta; Marcela Mercado Reyes; Uriel A. Hurtado Paez                                                                                                                                                                                                                                                                                                                                                                                                  |
| EPI_ISL_5199330, EPI_ISL_5199333, EPI_ISL_5199334, EPI_ISL_5199335, EPI_ISL_5199336, EPI_ISL_5199338                                                                                                                                                                                                                                                                                                                                                                                                                                                                            | Laboratorio SYNLAB Colombia                                                                                        | Instituto Nacional de Salud- Dirección de Investigación en Salud Pública                                                                                                                        | Beatriz de Arco; Carlos Franco-Muñoz; Carmen Osorio; Diana Malo; Diego A. Álvarez-Díaz; Diego Andrés Prada; Gerardo Santamaría; Hector Alejandro Ruiz-Moreno; Jhonnatan Reales-González; Jorge Rivera; Juan Camilo Martínez; Julian Naizaque; Katherine Laiton-Donato; Lisseth Pardo; Magdalena Wiesner; Marcela Mercado-Reyes; Maria T. Herrera-Sepúlveda; Marta Lopez Blanco; Martha Lucia Ospina Martínez; Paola Rojas; Sergio Gomez; Sheryll Corchuelo; Tatiana Cobos; Ángela Alarcon Cruz |
| EPI_ISL_2674355, EPI_ISL_2674358, EPI_ISL_2674359, EPI_ISL_2674360, EPI_ISL_2674366, EPI_ISL_2674367                                                                                                                                                                                                                                                                                                                                                                                                                                                                            | Laboratorio Salud Publica San Andres Islas                                                                         | Instituto Nacional de Salud- Dirección de Investigación en Salud Pública                                                                                                                        | Carlos Franco-Muñoz; Carmen Osorio; Diana Malo; Diego A. Álvarez-Díaz; Diego Andrés Prada; Gerardo Santamaría; Hector Alejandro Ruiz-Moreno; Jhonnatan Reales-González; Jorge Rivera; Juan Camilo Martínez; Julian Naizaque; Katherine Laiton-Donato; Lisseth Pardo; Magdalena Wiesner; Marcela Mercado-Reyes; Maria T. Herrera-Sepúlveda; Marta Lopez Blanco; Martha Lucia Ospina Martínez; Paola Rojas; Sergio Gomez; Sheryll Corchuelo; Ángela Alarcon Cruz                                 |
| EPI_ISL_4704040, EPI_ISL_4704066                                                                                                                                                                                                                                                                                                                                                                                                                                                                                                                                                | Laboratorio de Biología Molecular, Universidad Cooperativa de Colombia, Santa Marta                                | Laboratorio de Biología Molecular, Universidad Cooperativa de Colombia, Santa Marta                                                                                                             | Andres Rojas-Guloso; Andrew S. Muñoz-Gamba; Beatriz Maestre; Camila Gonzalez; Daniel B. Ramírez-Osorio; Emy S. Torres; Johanna Zúñiga; José A. Usme-Ciro; Paula A. Quintero-Cortés                                                                                                                                                                                                                                                                                                             |
| EPI_ISL_4561067                                                                                                                                                                                                                                                                                                                                                                                                                                                                                                                                                                 | Laboratorio de Biología Molecular. Servicio de Análisis Clínicos y Microbiología. Hospital de Sagunto              | SeqCOVID-SPAIN consortium/IBV(CSIC)                                                                                                                                                             | Agustin Irazo Tatay; Dra. Victoria Simón García; Gonzalo Llop Furquet; Noelia Lozano Rodriguez and SeqCOVID-SPAIN consortium; Sandra Moreno Marro                                                                                                                                                                                                                                                                                                                                              |
| EPI_ISL_4578878                                                                                                                                                                                                                                                                                                                                                                                                                                                                                                                                                                 | Laboratorio de Biología molecular del Hospital General de Agudos Dr. Carlos G. Durand                              | Área de Secuenciación del Laboratorio de Virología del Hospital de Niños Dr. Ricardo Gutierrez on behalf of 'Proyecto Argentino Interinstitucional de genómica de SARS-CoV-2' (PAIS Consortium) | A; Acuña; Anzorena; B; C; Carrón; Castro; Cañellas; Chiussi; Colina; Costa; D; Dahinten; Dima; Dominguez; E; Elsegood; F; Frisone; G; Gatica; Goya; Irrazábal; Jurado; L; LE; Leivas; Loayza; Lusso; M; MB; MF; MI; MS; Marchisio; Marina; Matillas; N; Nabaes Jodar; Narduzzi; Natale; Notaristéfano; R; Rivarola; Rodríguez Cardozo; Rodríguez Saá; Rozo; S; Theaux; Valinotto; Viegas, M.; W; Warszatska; Y; Yaunguzian                                                                     |
| EPI_ISL_5858818                                                                                                                                                                                                                                                                                                                                                                                                                                                                                                                                                                 | Laboratorio de Diagnóstico de Agentes Biológicos- LDAB                                                             | Universidad del Valle                                                                                                                                                                           | Andres Castillo; Beatriz Parra & Programa Nacional de Caracterización Genómica de SARS-CoV-2; Diana López-Alvarez; Erica M. Aristizabal; Flor Saa; Melissa Solarte; Nelson Rivera Franco                                                                                                                                                                                                                                                                                                       |
| EPI_ISL_5147062                                                                                                                                                                                                                                                                                                                                                                                                                                                                                                                                                                 | Laboratorio de Diagnóstico e Investigación BIOSCIENCE SRL                                                          | Laboratorio de Genómica Microbiana, Universidad Peruana Cayetano Heredia                                                                                                                        | Alejandra Dávila-Barclay; Diego Cuicapuza; Esdenka Pérez; Freddy Tinajeros; Guillermo Salvatierra; Janet Huancachoque; Luis González; Mauricio Prado; Pablo Tsukayama; Paula Carballo; Pedro E. Romero; Pool Marcos                                                                                                                                                                                                                                                                            |
| EPI_ISL_5490873, EPI_ISL_5490876, EPI_ISL_5490886                                                                                                                                                                                                                                                                                                                                                                                                                                                                                                                               | Laboratorio de Ecología de Doenças Transmissíveis na Amazonia. Instituto Leonidas e Maria Deane - Fiocruz Amazonia | Laboratorio de Ecología de Doenças Transmissíveis na Amazonia. Instituto Leonidas e Maria Deane - Fiocruz Amazonia                                                                              | Adele Schwartz Benzenken; André Corado; Felipe Naveca; Fernanda Nascimento; George Silva; José Joaquín Carvajal Cortés; Juan Camilo Grisales Nieto; Kelly Natalia Romero Vesga; Luciana Gonçalves; Maria Júlia Brandão; Matilde Mejía; Valdinete Nascimento; Victor Souza                                                                                                                                                                                                                      |
| EPI_ISL_3370449, EPI_ISL_3370450, EPI_ISL_3535709, EPI_ISL_3535716, EPI_ISL_3535723, EPI_ISL_3535724, EPI_ISL_3535725, EPI_ISL_3535726, EPI_ISL_3535727, EPI_ISL_3535728, EPI_ISL_3535729, EPI_ISL_3535748, EPI_ISL_3642579, EPI_ISL_3642580, EPI_ISL_3642581, EPI_ISL_3642582, EPI_ISL_3642583, EPI_ISL_4413327, EPI_ISL_4890139, EPI_ISL_4890140, EPI_ISL_4890141, EPI_ISL_4890142, EPI_ISL_4890143, EPI_ISL_4890144, EPI_ISL_4890145, EPI_ISL_4890146, EPI_ISL_4890147, EPI_ISL_5144794, EPI_ISL_5144804, EPI_ISL_5144823, EPI_ISL_5144825, EPI_ISL_5144826, EPI_ISL_5144876 | see above<br>Laboratorio de Infectologia y Virologia Molecular                                                     | Laboratory of Molecular Virology, School of Medicine, Pontificia Universidad Católica de Chile                                                                                                  | Ana Maria Contreras; Andres E. Munoz-Marcos; Carlos Palma; Catalina Pardo-Roa; Constanza Maldonado; Constanza Martinez-Valdevenito; Eileen Serrano; Erick Salinas; Estefany Poblete; Eugenia L. Fuentes Luppichini; Francisco Melo; Jennifer Angulo; Jorge Levican; Jorge Vera Otarola; Leonardo I. Almonacid; M. Belen Leyton; Marcela Ferres; María Jose Avendano; Rafael A. Medina; Tamara Garcia-Salum                                                                                     |



|                                                                                                                                                                                                                                                                                                                                                                                                                                                                                                                                                                                                                                                                                                                                                                                                                                                                                                                                                                                                                                                                                                                                                                                                                                                                                                                                                                                                                                                                                                                                                        |                                                                                                             |                                                                                                                            |                                                                                                                                                                                                                                                                                                                                                                                                                                                                                                                                                                                                                                                                                                                                               |                                                                                                                                                                                                                                                                                                                                                                                             |
|--------------------------------------------------------------------------------------------------------------------------------------------------------------------------------------------------------------------------------------------------------------------------------------------------------------------------------------------------------------------------------------------------------------------------------------------------------------------------------------------------------------------------------------------------------------------------------------------------------------------------------------------------------------------------------------------------------------------------------------------------------------------------------------------------------------------------------------------------------------------------------------------------------------------------------------------------------------------------------------------------------------------------------------------------------------------------------------------------------------------------------------------------------------------------------------------------------------------------------------------------------------------------------------------------------------------------------------------------------------------------------------------------------------------------------------------------------------------------------------------------------------------------------------------------------|-------------------------------------------------------------------------------------------------------------|----------------------------------------------------------------------------------------------------------------------------|-----------------------------------------------------------------------------------------------------------------------------------------------------------------------------------------------------------------------------------------------------------------------------------------------------------------------------------------------------------------------------------------------------------------------------------------------------------------------------------------------------------------------------------------------------------------------------------------------------------------------------------------------------------------------------------------------------------------------------------------------|---------------------------------------------------------------------------------------------------------------------------------------------------------------------------------------------------------------------------------------------------------------------------------------------------------------------------------------------------------------------------------------------|
| EPI_ISL_2308789, EPI_ISL_2448302                                                                                                                                                                                                                                                                                                                                                                                                                                                                                                                                                                                                                                                                                                                                                                                                                                                                                                                                                                                                                                                                                                                                                                                                                                                                                                                                                                                                                                                                                                                       | MONTEFIORE MEDICAL CENTER LABORATORIES                                                                      | Wadsworth Center, New York State Department of Health                                                                      | Alexis Russell; Catharine Prussing; Daryl M. Lamson; Erasmus Schneider; Erica Lasek-Nesselquist; John Kelly; Jonathan Pitnick; Kirsten St. George; Matthew Shudt; Melissa A Leisner; Navjot Singh                                                                                                                                                                                                                                                                                                                                                                                                                                                                                                                                             |                                                                                                                                                                                                                                                                                                                                                                                             |
| EPI_ISL_4489323                                                                                                                                                                                                                                                                                                                                                                                                                                                                                                                                                                                                                                                                                                                                                                                                                                                                                                                                                                                                                                                                                                                                                                                                                                                                                                                                                                                                                                                                                                                                        | MSHS Clinical Microbiology Laboratories                                                                     | MSHS Pathogen Surveillance Program                                                                                         | Adolfo Garcia-Sastre; Adriana van de Guchte; Ajay Obia; Alberto Paniz-Mondoffi; Ana S. Gonzalez-Reiche; Angela Amoako; Ashley Salimbangon; Betsaida Salom Melo; Bremy Alburquerque; Brienne Ciferri; Charles Gleason; Daniel Floda; Deena R. Altman; Denise Juczyszak; Emilia Mia Sordillo; Gintaras Deikus; Giulio Kleiner; Gopi Patel; Hala Alshammary; Harm van Bakel; Irina Oussenko; Jayeeta Dutta; Juan Soto; Julia Matthews; Katherine Beach; Kathryn Twyman; Kayla Russo; Komal Srivastava; Mahmoud Awawda; Marta Luksza; Matthew M. Hernandez; Melissa Gitman; Michael D. Nowak; Mitchell J. Sullivan; Nancy Francoeur; Robert Sebra; Sarah Schaefer; Shelcie Fabre; Shwetha Hara Sridhar; Viviana Simon; Ying-Chih Wang; Zenab Khan |                                                                                                                                                                                                                                                                                                                                                                                             |
| EPI_ISL_3947179                                                                                                                                                                                                                                                                                                                                                                                                                                                                                                                                                                                                                                                                                                                                                                                                                                                                                                                                                                                                                                                                                                                                                                                                                                                                                                                                                                                                                                                                                                                                        | MT Public Health Laboratory                                                                                 | Centers for Disease Control and Prevention Division of Viral Diseases, Pathogen Discovery                                  | Alex Burgin; Ben Rambo-Martin; Clinton Paden; Dakota Howard; Dave Wentworth; Dhvani Batra; Jasmine Padilla; Justin Lee; Krista Queen; Kristen Knipe; Kristine Lacey; Mark Burroughs; Matthew Schmerer; Meghan Bentz; Mili Sheth; Peter Cook; Sam Shepard; Sarah Nobles; Suxiang Tong; Vivien Dugan; Yvette Unoarumhi                                                                                                                                                                                                                                                                                                                                                                                                                          |                                                                                                                                                                                                                                                                                                                                                                                             |
| EPI_ISL_2802733                                                                                                                                                                                                                                                                                                                                                                                                                                                                                                                                                                                                                                                                                                                                                                                                                                                                                                                                                                                                                                                                                                                                                                                                                                                                                                                                                                                                                                                                                                                                        | Maine Health and Environmental Testing Laboratory                                                           | Tewhey Lab, The Jackson Laboratory                                                                                         | Barter, M.; Dewey, H.; H. and Tewhey, R.; Issue, F.; Lynch, R.; Matluk, N.; Munger                                                                                                                                                                                                                                                                                                                                                                                                                                                                                                                                                                                                                                                            |                                                                                                                                                                                                                                                                                                                                                                                             |
| EPI_ISL_3428564, EPI_ISL_3428565, EPI_ISL_3428571, EPI_ISL_3428870, EPI_ISL_3428896, EPI_ISL_3460844, EPI_ISL_3460845, EPI_ISL_3460847, EPI_ISL_3460850, EPI_ISL_3460852, EPI_ISL_3460853, EPI_ISL_3460855, EPI_ISL_3460856, EPI_ISL_3460857, EPI_ISL_3460861, EPI_ISL_3460865, EPI_ISL_3460870, EPI_ISL_3460872, EPI_ISL_3460874, EPI_ISL_3460880, EPI_ISL_3460883, EPI_ISL_3460884, EPI_ISL_3460895, EPI_ISL_3460890, EPI_ISL_3460891, EPI_ISL_3460899, EPI_ISL_3460929, EPI_ISL_3460938, EPI_ISL_3603329, EPI_ISL_3603373, EPI_ISL_3603430, EPI_ISL_3603488, EPI_ISL_3603493, EPI_ISL_3603525, EPI_ISL_3604073, EPI_ISL_3604192, EPI_ISL_3604375, EPI_ISL_3864737, EPI_ISL_3865057, EPI_ISL_4276502, EPI_ISL_4276503, EPI_ISL_4276543, EPI_ISL_4276634, EPI_ISL_4276635, EPI_ISL_4276643, EPI_ISL_4276796, EPI_ISL_4347733, EPI_ISL_4347736, EPI_ISL_4347742, EPI_ISL_4347753, EPI_ISL_4347761, EPI_ISL_4347764, EPI_ISL_4347780, EPI_ISL_4347804, EPI_ISL_4347806, EPI_ISL_4347808, EPI_ISL_4347818, EPI_ISL_4347891, EPI_ISL_4347896, EPI_ISL_4347907, EPI_ISL_4347921, EPI_ISL_4347928, EPI_ISL_4347930, EPI_ISL_4347936, EPI_ISL_4347946, EPI_ISL_4348003, EPI_ISL_4348017, EPI_ISL_4348024, EPI_ISL_4348026, EPI_ISL_4348028, EPI_ISL_4348032, EPI_ISL_4348036, EPI_ISL_4348037, EPI_ISL_4348040, EPI_ISL_4348067, EPI_ISL_4348075, EPI_ISL_4348085, EPI_ISL_4348093, EPI_ISL_4348102, EPI_ISL_4348124, EPI_ISL_4348126, EPI_ISL_4348137, EPI_ISL_4348141, EPI_ISL_4348158, EPI_ISL_4348196, EPI_ISL_4348235, EPI_ISL_4348243, EPI_ISL_5154663 | see above                                                                                                   | Mako Medical                                                                                                               | Centers for Disease Control and Prevention Division of Viral Diseases, Pathogen Discovery                                                                                                                                                                                                                                                                                                                                                                                                                                                                                                                                                                                                                                                     | Adrian Paskey; Benjamin Rambo-Martin; Christopher Gulvick; Clinton Paden; Clinton R. Paden; Dakota Howard; Darlene Wagner; Dhvani Batra; Duncan MacCannell; Erisa Sula; Jason Caravas; Kara Moser; Kristine Lacey; Lauren Moon; Matthew Schmerer; Matthew Tugwell; Peter Cook; Peter W. Cook; Scott Sammons; Shatavia Morrison; Tymeckia Kendall; Victoria Caban Figueroa; Yvette Unoarumhi |
| EPI_ISL_3276815                                                                                                                                                                                                                                                                                                                                                                                                                                                                                                                                                                                                                                                                                                                                                                                                                                                                                                                                                                                                                                                                                                                                                                                                                                                                                                                                                                                                                                                                                                                                        | Martin Luther King Jr. Community Hospital                                                                   | Los Angeles County Public Health Laboratories                                                                              | P. Hemarajata et al.                                                                                                                                                                                                                                                                                                                                                                                                                                                                                                                                                                                                                                                                                                                          |                                                                                                                                                                                                                                                                                                                                                                                             |
| EPI_ISL_4469059, EPI_ISL_4469125, EPI_ISL_4469135                                                                                                                                                                                                                                                                                                                                                                                                                                                                                                                                                                                                                                                                                                                                                                                                                                                                                                                                                                                                                                                                                                                                                                                                                                                                                                                                                                                                                                                                                                      | Maryland Genomics, Institute for Genome Sciences, University of Maryland School of Medicine                 | Maryland Genomics, Institute for Genome Sciences, University of Maryland School of Medicine                                | Claire M; Fraser; Hazen; Holly; Humphrys; Ivette; Jacques; Jonathan; Kranthi; Lim; Lisa D; Luke J; Mike; Ott; Ravel; Roussey; Sadzewicz; Sandra; Santana-Cruz; Tallon; Tracy; Vavikolanu                                                                                                                                                                                                                                                                                                                                                                                                                                                                                                                                                      |                                                                                                                                                                                                                                                                                                                                                                                             |
| EPI_ISL_3024797                                                                                                                                                                                                                                                                                                                                                                                                                                                                                                                                                                                                                                                                                                                                                                                                                                                                                                                                                                                                                                                                                                                                                                                                                                                                                                                                                                                                                                                                                                                                        | Maryland Public Health Laboratory (MD PHL)                                                                  | Maryland Public Health Laboratory (MD PHL)                                                                                 | Maryland Department of Health Laboratories Administration                                                                                                                                                                                                                                                                                                                                                                                                                                                                                                                                                                                                                                                                                     |                                                                                                                                                                                                                                                                                                                                                                                             |
| EPI_ISL_4601882, EPI_ISL_4601883                                                                                                                                                                                                                                                                                                                                                                                                                                                                                                                                                                                                                                                                                                                                                                                                                                                                                                                                                                                                                                                                                                                                                                                                                                                                                                                                                                                                                                                                                                                       | Mdlab                                                                                                       | Unidad de Secuenciación y Genómica, USACH                                                                                  | Ariel Aucapan; Carlos A. Villarreal; Francisco A. Cubillos; Kamila Urbina; Mara Cuevas; Marcelo Cortez-San Martin; Yesseny Vásquez-Martínez                                                                                                                                                                                                                                                                                                                                                                                                                                                                                                                                                                                                   |                                                                                                                                                                                                                                                                                                                                                                                             |
| EPI_ISL_2918865                                                                                                                                                                                                                                                                                                                                                                                                                                                                                                                                                                                                                                                                                                                                                                                                                                                                                                                                                                                                                                                                                                                                                                                                                                                                                                                                                                                                                                                                                                                                        | Medica                                                                                                      | Institute of Medical Virology                                                                                              | Alexandra Trkola; Annette Audigé; Cyril Shah; Gabriela Ziltener; Guido Bloemberg; Jon Huder; Jürg Böni; Kevin Steiner; Maria Grünberg; Maryam Zaheri; Michael Huber; Riccarda Capaul; Stefan Schmutz; Verena Kufner                                                                                                                                                                                                                                                                                                                                                                                                                                                                                                                           |                                                                                                                                                                                                                                                                                                                                                                                             |
| EPI_ISL_3332862                                                                                                                                                                                                                                                                                                                                                                                                                                                                                                                                                                                                                                                                                                                                                                                                                                                                                                                                                                                                                                                                                                                                                                                                                                                                                                                                                                                                                                                                                                                                        | Medyczne Laboratoria Diagnostyczne INVICTA                                                                  | Wojewodzka Stacja Sanitarno-Epidemiologiczna w Lodzi, Oddzial Laboratoryjny Mikrobiologii i Parazytologii                  | Agnieszka Karnowska; Aleksandra Krawczyk; Danuta Bartczak; Elian Terpo; Katarzyna Kosowska; Lucyna Kochanowska; Marta Gawronska; Martyna Matera; Szymon Konkolewski                                                                                                                                                                                                                                                                                                                                                                                                                                                                                                                                                                           |                                                                                                                                                                                                                                                                                                                                                                                             |
| EPI_ISL_4213081                                                                                                                                                                                                                                                                                                                                                                                                                                                                                                                                                                                                                                                                                                                                                                                                                                                                                                                                                                                                                                                                                                                                                                                                                                                                                                                                                                                                                                                                                                                                        | Michael E. DeBakery VA Medical Center                                                                       | Genomics and Discovery, Respiratory Viruses Branch, Division of Viral Diseases, Centers for Disease Control and Prevention | Adam Retchless; Anna KeHeber; Anna Uehara; Brian Lynch; Clinton R. Paden; Dhvani Batra; Haibin Wang; Han Jia Justin Ng; Jasmine Padilla; Jing Zhang; Justin Lee; Mark Burroughs; Mili Sheth; Morgan Davis; Peter Cook; Rachel Marine; Sarah Nobles; Suxiang Tong; Tara Coalter; Yan Li; Ying Tao                                                                                                                                                                                                                                                                                                                                                                                                                                              |                                                                                                                                                                                                                                                                                                                                                                                             |
| EPI_ISL_3425656, EPI_ISL_3637925                                                                                                                                                                                                                                                                                                                                                                                                                                                                                                                                                                                                                                                                                                                                                                                                                                                                                                                                                                                                                                                                                                                                                                                                                                                                                                                                                                                                                                                                                                                       | Michigan Department of Health and Human Services, Bureau of Laboratories                                    | Michigan Department of Health and Human Services, Bureau of Laboratories                                                   | Blankenship HM; Riner D; Soehnlén MK                                                                                                                                                                                                                                                                                                                                                                                                                                                                                                                                                                                                                                                                                                          |                                                                                                                                                                                                                                                                                                                                                                                             |
| EPI_ISL_2434004, EPI_ISL_2434016                                                                                                                                                                                                                                                                                                                                                                                                                                                                                                                                                                                                                                                                                                                                                                                                                                                                                                                                                                                                                                                                                                                                                                                                                                                                                                                                                                                                                                                                                                                       | Microbiologia CATLAB                                                                                        | Can Ruti SARS-CoV-2 Sequencing Hub (HUGTIP/IRSI/CAIXA/IGTP)                                                                | Alba Sánchez; Anna Not; Antoni E Bordoy; Bonaventura Clotet; Cristina Casa; Cristina Esteban; Francesc Catala-Moll; Gemma Clara; Ignacio Blanco; Marc Noguera-Julian; Maria Casadellà; Mariona Parera; Mercedes Guerrero; Montserrat Giménez; Pere-Joan Cardona; Pilar Armengol; Roger Paredes; Verónica Saludes; and Elisa Martró on behalf of the Can Ruti SARS-CoV-2 Sequencing Hub.                                                                                                                                                                                                                                                                                                                                                       |                                                                                                                                                                                                                                                                                                                                                                                             |
| EPI_ISL_2650260, EPI_ISL_2650339, EPI_ISL_2681553, EPI_ISL_2681587, EPI_ISL_2681597, EPI_ISL_2681608, EPI_ISL_2681619, EPI_ISL_2681630, EPI_ISL_2832122                                                                                                                                                                                                                                                                                                                                                                                                                                                                                                                                                                                                                                                                                                                                                                                                                                                                                                                                                                                                                                                                                                                                                                                                                                                                                                                                                                                                | see above                                                                                                   | Microbiologia CATLAB                                                                                                       | Alba Sánchez; Alexia París; Anna Not; Antoni E Bordoy; Bonaventura Clotet; Cristina Casa; Cristina Esteban; David Panisello; Francesc Catala-Moll; Gemma Clara; Ignacio Blanco; Laia Soler; Lauro Sumoy; Marc Noguera-Julian; Maria Casadellà; Mariona Parera; Mercedes Guerrero; Montserrat Giménez; Pere-Joan Cardona; Pilar Armengol; Roger Paredes; Verónica Saludes; and Elisa Martró on behalf of the Can Ruti SARS-CoV-2 Sequencing Hub                                                                                                                                                                                                                                                                                                |                                                                                                                                                                                                                                                                                                                                                                                             |
| EPI_ISL_3908123                                                                                                                                                                                                                                                                                                                                                                                                                                                                                                                                                                                                                                                                                                                                                                                                                                                                                                                                                                                                                                                                                                                                                                                                                                                                                                                                                                                                                                                                                                                                        | Microbiology Department & Molecular Biology CORE   CDB   Hospital Clinic   Barcelona                        | Microbiology Department & Molecular Biology CORE   CDB   Hospital Clinic   Barcelona                                       | Andrea Vergara Gomez   Jose Luis Villanueva Canas   Miguel Julian Martinez Yoldi   M. Mar Mosquera Gutierrez   M. Angeles Marcos Maeso                                                                                                                                                                                                                                                                                                                                                                                                                                                                                                                                                                                                        |                                                                                                                                                                                                                                                                                                                                                                                             |
| EPI_ISL_2433995, EPI_ISL_2448071, EPI_ISL_2448085, EPI_ISL_2509223, EPI_ISL_2650187, EPI_ISL_2650209, EPI_ISL_2650251, EPI_ISL_2650257, EPI_ISL_2650269, EPI_ISL_2650288, EPI_ISL_2650291, EPI_ISL_2650292, EPI_ISL_2650299, EPI_ISL_2650300, EPI_ISL_2650318, EPI_ISL_2650347, EPI_ISL_2671380, EPI_ISL_2671394, EPI_ISL_2671396, EPI_ISL_2671409, EPI_ISL_2681554, EPI_ISL_2681560, EPI_ISL_2681579, EPI_ISL_2681582, EPI_ISL_2681583, EPI_ISL_2681604, EPI_ISL_2681626, EPI_ISL_2718581, EPI_ISL_2812442, EPI_ISL_2812489, EPI_ISL_2812493, EPI_ISL_2812501, EPI_ISL_2812527, EPI_ISL_2832146, EPI_ISL_2832148, EPI_ISL_2832158, EPI_ISL_2832204, EPI_ISL_3156111                                                                                                                                                                                                                                                                                                                                                                                                                                                                                                                                                                                                                                                                                                                                                                                                                                                                                   | see above                                                                                                   | Microbiology Department, Laboratori Clinic Metropolitana Nord. Hospital Universitari Germans Trias i Pujol                 | Alba Snchez; Alba Sánchez; Alexia París; Anna Not; Antoni E Bordoy; Bonaventura Clotet; Cristina Casa; Cristina Casa; Cristina Esteban; David Panisello; Francesc Catala-Moll; Gemma Clara; Ignacio Blanco; Laia Soler; Lauro Sumoy; Marc Noguera-Julian; Maria Casadellà; Maria Casadellà; Mariona Parera; Mercedes Guerrero; Montserrat Gimnez; Montserrat Giménez; Pere-Joan Cardona; Pilar Armengol; Roger Paredes; Vernica Saludes; Verónica Saludes; and Elisa Martró on behalf of the Can Ruti SARS-CoV-2 Sequencing Hub; and Elisa Martró on behalf of the Can Ruti SARS-CoV-2 Sequencing Hub.                                                                                                                                        |                                                                                                                                                                                                                                                                                                                                                                                             |
| EPI_ISL_2254191                                                                                                                                                                                                                                                                                                                                                                                                                                                                                                                                                                                                                                                                                                                                                                                                                                                                                                                                                                                                                                                                                                                                                                                                                                                                                                                                                                                                                                                                                                                                        | Microbiology Department, Laboratori Clinic Metropolitana Nord. Hospital Universitari Germans Trias i Pujol. | Can Ruti SARS-CoV-2 Sequencing Hub (HUGTIP/IRSI/CAIXA/IGTP)                                                                | Alba Sánchez; Anna Not; Antoni E Bordoy; Bonaventura Clotet; Cristina Casa; Cristina Esteban; Francesc Catala-Moll; Gemma Clara; Ignacio Blanco; Marc Noguera-Julian; Maria Casadellà; Mariona Parera; Mercedes Guerrero; Montserrat Giménez; Pere-Joan Cardona; Pilar Armengol; Roger Paredes; Verónica Saludes; and Elisa Martró on behalf of the Can Ruti SARS-CoV-2 Sequencing Hub.                                                                                                                                                                                                                                                                                                                                                       |                                                                                                                                                                                                                                                                                                                                                                                             |
| EPI_ISL_2774131, EPI_ISL_2786968, EPI_ISL_2786969, EPI_ISL_3117557, EPI_ISL_3117558, EPI_ISL_3117559, EPI_ISL_3245771, EPI_ISL_3631653, EPI_ISL_3761812, EPI_ISL_3761813, EPI_ISL_3761814, EPI_ISL_3761815, EPI_ISL_3761816, EPI_ISL_4137465, EPI_ISL_4491624, EPI_ISL_5331929, EPI_ISL_5331931, EPI_ISL_5331932                                                                                                                                                                                                                                                                                                                                                                                                                                                                                                                                                                                                                                                                                                                                                                                                                                                                                                                                                                                                                                                                                                                                                                                                                                       | see above                                                                                                   | Microbiology Department, University Hospital Donostia                                                                      | Cilla G.; Gomez M; Marimon JM; Martin-Peñaranda T; Montes M; Piñero L; Sorraín A                                                                                                                                                                                                                                                                                                                                                                                                                                                                                                                                                                                                                                                              |                                                                                                                                                                                                                                                                                                                                                                                             |
| EPI_ISL_2566189, EPI_ISL_3241823, EPI_ISL_3241824, EPI_ISL_3241825, EPI_ISL_3241827, EPI_ISL_3470144, EPI_ISL_3470148, EPI_ISL_3470152, EPI_ISL_3470156, EPI_ISL_3470160, EPI_ISL_3470164, EPI_ISL_3470168, EPI_ISL_3470173, EPI_ISL_3470177, EPI_ISL_3470181, EPI_ISL_3470185, EPI_ISL_3470189, EPI_ISL_3470193, EPI_ISL_3470197, EPI_ISL_3470201, EPI_ISL_3470206, EPI_ISL_3470210, EPI_ISL_3470214, EPI_ISL_3470218, EPI_ISL_3470222, EPI_ISL_3470226, EPI_ISL_4273619, EPI_ISL_4458487                                                                                                                                                                                                                                                                                                                                                                                                                                                                                                                                                                                                                                                                                                                                                                                                                                                                                                                                                                                                                                                             | see above                                                                                                   | Microbiology Department, Complejo Hospitalario Universitario de Vigo                                                       | Alfaya N; Alonso I; Alvarez M; Cabrera Jj; Carballo R; Cores O; Cortizo S; Davina C; Martinez L; Mediero G; Pena I; Perez S; Potel C; Regueiro B; Rey S; Vassalo Fj; del-Campo V                                                                                                                                                                                                                                                                                                                                                                                                                                                                                                                                                              |                                                                                                                                                                                                                                                                                                                                                                                             |
| EPI_ISL_1820898, EPI_ISL_1820899, EPI_ISL_2259204, EPI_ISL_2259205, EPI_ISL_2420759                                                                                                                                                                                                                                                                                                                                                                                                                                                                                                                                                                                                                                                                                                                                                                                                                                                                                                                                                                                                                                                                                                                                                                                                                                                                                                                                                                                                                                                                    | EPI_ISL_2018161, EPI_ISL_2598154                                                                            | Microvida                                                                                                                  | Microvida                                                                                                                                                                                                                                                                                                                                                                                                                                                                                                                                                                                                                                                                                                                                     | Jaco Verweij; Joep Stohr; Joep Stöhr; Suzan D. Pas                                                                                                                                                                                                                                                                                                                                          |
| EPI_ISL_5590234, EPI_ISL_5599377, EPI_ISL_6158476, EPI_ISL_6174269, EPI_ISL_6174323                                                                                                                                                                                                                                                                                                                                                                                                                                                                                                                                                                                                                                                                                                                                                                                                                                                                                                                                                                                                                                                                                                                                                                                                                                                                                                                                                                                                                                                                    | Minnesota Department of Health, Public Health Laboratory                                                    | Minnesota Department of Health, Public Health Laboratory                                                                   | Alexandra Lorentz; Jacob Garfin; Matt Plumb; and Xiong Wang                                                                                                                                                                                                                                                                                                                                                                                                                                                                                                                                                                                                                                                                                   |                                                                                                                                                                                                                                                                                                                                                                                             |
| EPI_ISL_3914609                                                                                                                                                                                                                                                                                                                                                                                                                                                                                                                                                                                                                                                                                                                                                                                                                                                                                                                                                                                                                                                                                                                                                                                                                                                                                                                                                                                                                                                                                                                                        | Montana Public Health Laboratory                                                                            | Montana Public Health Laboratory                                                                                           | Changhong Yin; Heather Duncan; John T. Fallon; Kimberly P. Briley; Weihua Huang                                                                                                                                                                                                                                                                                                                                                                                                                                                                                                                                                                                                                                                               |                                                                                                                                                                                                                                                                                                                                                                                             |
| EPI_ISL_4435509, EPI_ISL_4435510                                                                                                                                                                                                                                                                                                                                                                                                                                                                                                                                                                                                                                                                                                                                                                                                                                                                                                                                                                                                                                                                                                                                                                                                                                                                                                                                                                                                                                                                                                                       | Monterey County Public Health Laboratory                                                                    | Monterey County Public Health Laboratory                                                                                   | Carrie Biskupiak; Deborah Gibson; Joy Ritter; Michael Dills; Michelle Mozer                                                                                                                                                                                                                                                                                                                                                                                                                                                                                                                                                                                                                                                                   |                                                                                                                                                                                                                                                                                                                                                                                             |
| EPI_ISL_3127849, EPI_ISL_4051577                                                                                                                                                                                                                                                                                                                                                                                                                                                                                                                                                                                                                                                                                                                                                                                                                                                                                                                                                                                                                                                                                                                                                                                                                                                                                                                                                                                                                                                                                                                       | NCSLPH                                                                                                      | NCSLPH                                                                                                                     | Monterey County Public Health Laboratory                                                                                                                                                                                                                                                                                                                                                                                                                                                                                                                                                                                                                                                                                                      |                                                                                                                                                                                                                                                                                                                                                                                             |
| EPI_ISL_3305778                                                                                                                                                                                                                                                                                                                                                                                                                                                                                                                                                                                                                                                                                                                                                                                                                                                                                                                                                                                                                                                                                                                                                                                                                                                                                                                                                                                                                                                                                                                                        | ND Dept. of Health Laboratory Services- Microbiology                                                        | Centers for Disease Control and Prevention Division of Viral Diseases, Pathogen Discovery                                  | Chase K; Glover W; Greene S; Miller MC                                                                                                                                                                                                                                                                                                                                                                                                                                                                                                                                                                                                                                                                                                        |                                                                                                                                                                                                                                                                                                                                                                                             |
| EPI_ISL_3387472, EPI_ISL_3387500, EPI_ISL_3398090, EPI_ISL_3547115,                                                                                                                                                                                                                                                                                                                                                                                                                                                                                                                                                                                                                                                                                                                                                                                                                                                                                                                                                                                                                                                                                                                                                                                                                                                                                                                                                                                                                                                                                    | NJDOH, Public Health and Environmental Laboratories                                                         | NJ_PHEL                                                                                                                    | Alex Burgin; Ben L. Rambo-Martin; Clinton R. Paden; Dakota Howard; Dave Wentworth; Dhvani Batra; Jasmine Padilla; Justin Lee; Krista Queen; Kristen Knipe; Kristine Lacey; Mark Burroughs; Matthew Schmerer; Meghan Bentz; Mili Sheth; Peter Cook; Sam Shepard; Sarah Nobles; Suxiang Tong; Vivien Dugan; Yvette Unoarumhi                                                                                                                                                                                                                                                                                                                                                                                                                    |                                                                                                                                                                                                                                                                                                                                                                                             |
|                                                                                                                                                                                                                                                                                                                                                                                                                                                                                                                                                                                                                                                                                                                                                                                                                                                                                                                                                                                                                                                                                                                                                                                                                                                                                                                                                                                                                                                                                                                                                        |                                                                                                             |                                                                                                                            | Allison Roder; Byeong Jeong; Chelsea San Filippo; Dana Woell; Jacquelyn Deverell; Lindsey Bodnar; Maria-Magdalene Pugliese; Mohammad M. Ali; Ryan Pachucki; Shiv K. Verma                                                                                                                                                                                                                                                                                                                                                                                                                                                                                                                                                                     |                                                                                                                                                                                                                                                                                                                                                                                             |



|                                                                                                                                                                                                                                                                                                                                                                                                                                                                                                                                                                                                                                                                                                                                                                                                                                                                                                                                                                                                                                                                                                                                                                                                                                                                                                                                                                                                                                                                                                                                                                                                                                                                                                                                                                                                                                                                                                                                                                                                                                                                                                                                                                                                                                                                                                                   |                                                                                |                                                                                                                                                                                                                                            |                                                                                                                                                                                                                                                                                                                                                                                                                                                                                                                                                                                                                                          |  |
|-------------------------------------------------------------------------------------------------------------------------------------------------------------------------------------------------------------------------------------------------------------------------------------------------------------------------------------------------------------------------------------------------------------------------------------------------------------------------------------------------------------------------------------------------------------------------------------------------------------------------------------------------------------------------------------------------------------------------------------------------------------------------------------------------------------------------------------------------------------------------------------------------------------------------------------------------------------------------------------------------------------------------------------------------------------------------------------------------------------------------------------------------------------------------------------------------------------------------------------------------------------------------------------------------------------------------------------------------------------------------------------------------------------------------------------------------------------------------------------------------------------------------------------------------------------------------------------------------------------------------------------------------------------------------------------------------------------------------------------------------------------------------------------------------------------------------------------------------------------------------------------------------------------------------------------------------------------------------------------------------------------------------------------------------------------------------------------------------------------------------------------------------------------------------------------------------------------------------------------------------------------------------------------------------------------------|--------------------------------------------------------------------------------|--------------------------------------------------------------------------------------------------------------------------------------------------------------------------------------------------------------------------------------------|------------------------------------------------------------------------------------------------------------------------------------------------------------------------------------------------------------------------------------------------------------------------------------------------------------------------------------------------------------------------------------------------------------------------------------------------------------------------------------------------------------------------------------------------------------------------------------------------------------------------------------------|--|
| EPI_ISL_4368529, EPI_ISL_4368544, EPI_ISL_4368579, EPI_ISL_4368584, EPI_ISL_4368614, EPI_ISL_4368658, EPI_ISL_4368745, EPI_ISL_4368789, EPI_ISL_4368810, EPI_ISL_4368818, EPI_ISL_4368894, EPI_ISL_4368934, EPI_ISL_4368955, EPI_ISL_4368967, EPI_ISL_4368977, EPI_ISL_4369024, EPI_ISL_4369038, EPI_ISL_4369093, EPI_ISL_4369116, EPI_ISL_4369119, EPI_ISL_4369123, EPI_ISL_4369125, EPI_ISL_4369192, EPI_ISL_4369203, EPI_ISL_4369209, EPI_ISL_4369236, EPI_ISL_4369250, EPI_ISL_4369276, EPI_ISL_4369293, EPI_ISL_4369307, EPI_ISL_4369311, EPI_ISL_4369321, EPI_ISL_4369326, EPI_ISL_4369341, EPI_ISL_4369368, EPI_ISL_4369402, EPI_ISL_4369458, EPI_ISL_4369494, EPI_ISL_4369504, EPI_ISL_4369512, EPI_ISL_4369514, EPI_ISL_4369536, EPI_ISL_4369542, EPI_ISL_4369561, EPI_ISL_4369567, EPI_ISL_4369628, EPI_ISL_4369649, EPI_ISL_4369651, EPI_ISL_4369670, EPI_ISL_4369678, EPI_ISL_4369753, EPI_ISL_4369780, EPI_ISL_4369786, EPI_ISL_4369797, EPI_ISL_4369811, EPI_ISL_4369854, EPI_ISL_4369856, EPI_ISL_4369869, EPI_ISL_4369871, EPI_ISL_4369885, EPI_ISL_4369895, EPI_ISL_4369902, EPI_ISL_4369912, EPI_ISL_4369913, EPI_ISL_4369913, EPI_ISL_4369970, EPI_ISL_4370017, EPI_ISL_4370035, EPI_ISL_4370050, EPI_ISL_4370059, EPI_ISL_4370137, EPI_ISL_4370152, EPI_ISL_4370165, EPI_ISL_4370207, EPI_ISL_4370217, EPI_ISL_4370275, EPI_ISL_4370278, EPI_ISL_4370290, EPI_ISL_4370291, EPI_ISL_4370294, EPI_ISL_4370307, EPI_ISL_4370309, EPI_ISL_4370311, EPI_ISL_4370323, EPI_ISL_4370327, EPI_ISL_4370395, EPI_ISL_4370418, EPI_ISL_4370431, EPI_ISL_4370484, EPI_ISL_4370492, EPI_ISL_4370525, EPI_ISL_4370536, EPI_ISL_4370541, EPI_ISL_4370544, EPI_ISL_4370560, EPI_ISL_4370570, EPI_ISL_4370584, EPI_ISL_4370614, EPI_ISL_4370630, EPI_ISL_4370636, EPI_ISL_4370671, EPI_ISL_4370691, EPI_ISL_4370701, EPI_ISL_4370741, EPI_ISL_4370746, EPI_ISL_4370758, EPI_ISL_4370810, EPI_ISL_4370841, EPI_ISL_4370842, EPI_ISL_4370851, EPI_ISL_4370853, EPI_ISL_4370879, EPI_ISL_4370901, EPI_ISL_4370932, EPI_ISL_4370934, EPI_ISL_4370943, EPI_ISL_4370947, EPI_ISL_4370974, EPI_ISL_4370976, EPI_ISL_4370979, EPI_ISL_4370986, EPI_ISL_4370995, EPI_ISL_4371039, EPI_ISL_4371066, EPI_ISL_4371085, EPI_ISL_4371102, EPI_ISL_4373368, EPI_ISL_5068063, EPI_ISL_5846287, EPI_ISL_5846288, EPI_ISL_5929268 |                                                                                |                                                                                                                                                                                                                                            |                                                                                                                                                                                                                                                                                                                                                                                                                                                                                                                                                                                                                                          |  |
| see above                                                                                                                                                                                                                                                                                                                                                                                                                                                                                                                                                                                                                                                                                                                                                                                                                                                                                                                                                                                                                                                                                                                                                                                                                                                                                                                                                                                                                                                                                                                                                                                                                                                                                                                                                                                                                                                                                                                                                                                                                                                                                                                                                                                                                                                                                                         | Quest Diagnostics Incorporated                                                 | Centers for Disease Control and Prevention Division of Viral Diseases, Pathogen Discovery                                                                                                                                                  | A. Gerasimova; A. Perez; Adrian Paskey; B. Anderson; Benjamin Rambo-Martin; Christopher Gulvick; Clinton Paden; Clinton R. Paden; Dakota Howard; Darlene Wagner; Dhvani Batra; Duncan MacCannell; Erisa Sula; F. Lacbawan; I. A. Shlyakhter; I. Shlyakhter; Jason Caravas; K. Livingston; K.E. Livingston; Kara Moser; Kristine Lacey; L. Bernstein; L.E. Bernstein; M. Hua; Matthew Schmerer; P. Tanpaiboon; Peter Cook; Peter W. Cook; R. Kagan; R. M. Kagan; R. Owen; R. Rolando; R. V. Rolando; S. H. Rosenthal; S. Rosenthal; Scott Sammons; Shantavia Morrison; Tymecia Kendall; Victoria Caban Figueroa; Y. Liu; Yvette Unoarumhi |  |
| EPI_ISL_3305782                                                                                                                                                                                                                                                                                                                                                                                                                                                                                                                                                                                                                                                                                                                                                                                                                                                                                                                                                                                                                                                                                                                                                                                                                                                                                                                                                                                                                                                                                                                                                                                                                                                                                                                                                                                                                                                                                                                                                                                                                                                                                                                                                                                                                                                                                                   | RI State Health Laboratories                                                   | Centers for Disease Control and Prevention Division of Viral Diseases, Pathogen Discovery                                                                                                                                                  | Alex Burgin; Ben L. Rambo-Martin; Clinton R. Paden; Dakota Howard; Dave Wentworth; Dhvani Batra; Jasmine Padilla; Justin Lee; Krista Queen; Kristen Knipe; Kristine Lacey; Mark Burroughs; Matthew Schmerer; Meghan Bentz; Mill Sheth; Peter Cook; Sam Shepard; Sarah Nobles; Suxiang Tong; Vivien Dugan; Yvette Unoarumhi                                                                                                                                                                                                                                                                                                               |  |
| EPI_ISL_4060244                                                                                                                                                                                                                                                                                                                                                                                                                                                                                                                                                                                                                                                                                                                                                                                                                                                                                                                                                                                                                                                                                                                                                                                                                                                                                                                                                                                                                                                                                                                                                                                                                                                                                                                                                                                                                                                                                                                                                                                                                                                                                                                                                                                                                                                                                                   | Regional Hospital Liberec                                                      | Regional Hospital Liberec                                                                                                                                                                                                                  | Iva Dolinova; Katerina Arientova; Katerina Stillerova; Martin Kracik; Tomas Zajic                                                                                                                                                                                                                                                                                                                                                                                                                                                                                                                                                        |  |
| EPI_ISL_2818299, EPI_ISL_3080965, EPI_ISL_3081128, EPI_ISL_3179560, EPI_ISL_3179619, EPI_ISL_3291244, EPI_ISL_3291275, EPI_ISL_3291363, EPI_ISL_3291371, EPI_ISL_3291394, EPI_ISL_3291395, EPI_ISL_3291406, EPI_ISL_3291513, EPI_ISL_3292337, EPI_ISL_3292509, EPI_ISL_3573331, EPI_ISL_3573820, EPI_ISL_3574292, EPI_ISL_377185, EPI_ISL_4531131, EPI_ISL_5810934                                                                                                                                                                                                                                                                                                                                                                                                                                                                                                                                                                                                                                                                                                                                                                                                                                                                                                                                                                                                                                                                                                                                                                                                                                                                                                                                                                                                                                                                                                                                                                                                                                                                                                                                                                                                                                                                                                                                                |                                                                                |                                                                                                                                                                                                                                            |                                                                                                                                                                                                                                                                                                                                                                                                                                                                                                                                                                                                                                          |  |
| see above                                                                                                                                                                                                                                                                                                                                                                                                                                                                                                                                                                                                                                                                                                                                                                                                                                                                                                                                                                                                                                                                                                                                                                                                                                                                                                                                                                                                                                                                                                                                                                                                                                                                                                                                                                                                                                                                                                                                                                                                                                                                                                                                                                                                                                                                                                         | Respiratory Virus Unit, Microbiology Services Colindale, Public Health England | COVID-19 Genomics UK (COG-UK) Consortium                                                                                                                                                                                                   | PHE Covid Sequencing Team                                                                                                                                                                                                                                                                                                                                                                                                                                                                                                                                                                                                                |  |
| EPI_ISL_4520805, EPI_ISL_4520810                                                                                                                                                                                                                                                                                                                                                                                                                                                                                                                                                                                                                                                                                                                                                                                                                                                                                                                                                                                                                                                                                                                                                                                                                                                                                                                                                                                                                                                                                                                                                                                                                                                                                                                                                                                                                                                                                                                                                                                                                                                                                                                                                                                                                                                                                  | Rey Fals                                                                       | Universidad Nacional de Colombia - Laboratorio Genómico One Health                                                                                                                                                                         | Andres F. Cardona-Rios; Carlos Franco-Muñoz; Carolina Muñoz-Arango; Celeny Ortiz; Daniel O. Maldonado-Perez; Diego A. Álvarez-Díaz; Hector Alejandro Ruiz-Moreno; Idabely Betancur Ortiz; Jorge E. Osorio; Juan P. Hernandez-Ortiz; Karl A Ciuoderis; Katherine Laiton-Donato; Laura Silvana Perez; Lina M. Hurtado; Marcela Mercado-Reyes; Maria Angélica Maya; Maria Stella López; Rita Almanza Payares; Sandra Ines Cano; Simón Villegas Velásquez                                                                                                                                                                                    |  |
| EPI_ISL_3398986, EPI_ISL_3801373                                                                                                                                                                                                                                                                                                                                                                                                                                                                                                                                                                                                                                                                                                                                                                                                                                                                                                                                                                                                                                                                                                                                                                                                                                                                                                                                                                                                                                                                                                                                                                                                                                                                                                                                                                                                                                                                                                                                                                                                                                                                                                                                                                                                                                                                                  | Rhode Island State Health Laboratory                                           | Rhode Island State Health Laboratory                                                                                                                                                                                                       | Ewa King; Kristin Carpenter-Azevedo; Richard C. Huard                                                                                                                                                                                                                                                                                                                                                                                                                                                                                                                                                                                    |  |
| EPI_ISL_4542967                                                                                                                                                                                                                                                                                                                                                                                                                                                                                                                                                                                                                                                                                                                                                                                                                                                                                                                                                                                                                                                                                                                                                                                                                                                                                                                                                                                                                                                                                                                                                                                                                                                                                                                                                                                                                                                                                                                                                                                                                                                                                                                                                                                                                                                                                                   | Rush University Medical Center                                                 | RIPHL at Rush University Medical Center                                                                                                                                                                                                    | Diane Springer; Edith Perez; Felix Araujo Perez; Joyce Houlihan; Kevin Kunstman; Laura Furtado; Marieta Hyde; Mary Hayden; Sofiya Bobrovska; Stefan Green                                                                                                                                                                                                                                                                                                                                                                                                                                                                                |  |
| EPI_ISL_2754201                                                                                                                                                                                                                                                                                                                                                                                                                                                                                                                                                                                                                                                                                                                                                                                                                                                                                                                                                                                                                                                                                                                                                                                                                                                                                                                                                                                                                                                                                                                                                                                                                                                                                                                                                                                                                                                                                                                                                                                                                                                                                                                                                                                                                                                                                                   | S.C Microbiologia e virologia - Speciale Centro influenza - AOU di Sassari     | Laboratorio Biologia Molecolare Sars Cov2 - UOC Laboratorio Analisi - Servizio Medicina di Laboratorio, Ospedale "San Francesco" - ATS-ASSL Nuoro and Laboratorio specialistico UOC Ematologia - Ospedale "San Francesco" - ATS-ASSL Nuoro | Asproni Rosanna; Carta Franco; Fancello Patrizia; Fiamma Maura; Garau Maria Cristina; Malune Paolo; Mamelì Giuseppe; Palmas Angelo Domenico; Pira Giovanna; Piras Giovanna; Rimini Elena; Rosu Valentina; Salvatore Rubino; Serra Caterina                                                                                                                                                                                                                                                                                                                                                                                               |  |
| EPI_ISL_2621211                                                                                                                                                                                                                                                                                                                                                                                                                                                                                                                                                                                                                                                                                                                                                                                                                                                                                                                                                                                                                                                                                                                                                                                                                                                                                                                                                                                                                                                                                                                                                                                                                                                                                                                                                                                                                                                                                                                                                                                                                                                                                                                                                                                                                                                                                                   | SAN VICENTE FUNDACION                                                          | Universidad Nacional de Colombia - Laboratorio Genómico One Health                                                                                                                                                                         | Andres F. Cardona-Rios; Carlos Franco-Muñoz; Carolina Muñoz-Arango; Celeny Ortiz; Daniel O. Maldonado-Perez; Diego A. Álvarez-Díaz; Hector Alejandro Ruiz-Moreno; Idabely Betancur Ortiz; Jorge E. Osorio; Juan P. Hernandez-Ortiz; Karl A Ciuoderis; Katherine Laiton-Donato; Laura Silvana Perez; Lina M. Hurtado; Marcela Mercado-Reyes; Maria Angélica Maya; Maria Stella López; Rita Almanza Payares; Sandra Ines Cano; Simón Villegas Velásquez                                                                                                                                                                                    |  |
| EPI_ISL_2986006, EPI_ISL_2986007, EPI_ISL_2986045, EPI_ISL_2986156, EPI_ISL_2986434, EPI_ISL_2986955, EPI_ISL_2986975, EPI_ISL_2986976, EPI_ISL_2986977, EPI_ISL_3056534, EPI_ISL_3056536, EPI_ISL_3056537, EPI_ISL_3056542, EPI_ISL_3056705, EPI_ISL_30646349, EPI_ISL_30646350, EPI_ISL_30646351, EPI_ISL_30646352, EPI_ISL_30646353, EPI_ISL_30646354, EPI_ISL_30646355, EPI_ISL_30646356, EPI_ISL_30646357, EPI_ISL_30646358, EPI_ISL_30646359, EPI_ISL_30646360, EPI_ISL_30646361, EPI_ISL_30646362, EPI_ISL_3881788, EPI_ISL_3881794, EPI_ISL_3881799, EPI_ISL_3881803, EPI_ISL_3881808, EPI_ISL_3881812, EPI_ISL_3881815, EPI_ISL_3881820, EPI_ISL_3881821, EPI_ISL_3881823, EPI_ISL_3881825, EPI_ISL_3881827, EPI_ISL_3881832, EPI_ISL_3881838, EPI_ISL_3881839, EPI_ISL_3881841, EPI_ISL_3881843, EPI_ISL_3881844, EPI_ISL_3881854, EPI_ISL_3909164, EPI_ISL_3909165                                                                                                                                                                                                                                                                                                                                                                                                                                                                                                                                                                                                                                                                                                                                                                                                                                                                                                                                                                                                                                                                                                                                                                                                                                                                                                                                                                                                                                     |                                                                                |                                                                                                                                                                                                                                            |                                                                                                                                                                                                                                                                                                                                                                                                                                                                                                                                                                                                                                          |  |
| see above                                                                                                                                                                                                                                                                                                                                                                                                                                                                                                                                                                                                                                                                                                                                                                                                                                                                                                                                                                                                                                                                                                                                                                                                                                                                                                                                                                                                                                                                                                                                                                                                                                                                                                                                                                                                                                                                                                                                                                                                                                                                                                                                                                                                                                                                                                         | SARS-CoV-2 Sequencing Castilla y Leon-Spain Consortium                         | SARS-CoV-2 Sequencing Castilla y Leon-Spain Consortium                                                                                                                                                                                     | Antonio Orduña-Domingo; Carlos Fuster Foz; Carmen Aldea-Mansilla; Carmen Gimeno Crespo; David Abad; Gabriel March Rosello; Gabriel March Rosello; Gregoria Megias Lobón; Jose Maria Eiros Bouza; Laura Sánchez de Prada; M. Isabel Fernandez-Natal; Marta Dominguez-Gil; Marta Hernandez; María Antonia García Castro; Mª Fe Brezmes-Valdivieso; Noelia Arenal Andrés; Silvia Rojo; Sonsoles Garcinuño Pérez                                                                                                                                                                                                                             |  |
| EPI_ISL_2933813, EPI_ISL_2933815                                                                                                                                                                                                                                                                                                                                                                                                                                                                                                                                                                                                                                                                                                                                                                                                                                                                                                                                                                                                                                                                                                                                                                                                                                                                                                                                                                                                                                                                                                                                                                                                                                                                                                                                                                                                                                                                                                                                                                                                                                                                                                                                                                                                                                                                                  | SARS-CoV-2 testing team, National Institute of Infectious Diseases             | Pathogen Genomics Center, National Institute of Infectious Diseases                                                                                                                                                                        | Hazuka Y Furihata; Hiromizu Takahashi; Kentaro Itokawa; Makoto Kuroda; Masanori Hashino; Masumichi Saito; Naomi Nojiri; Nozomu Hanaaka; Rina Tanaka; Tsugoto Fujimoto; Tsyushi Sekizuka                                                                                                                                                                                                                                                                                                                                                                                                                                                  |  |
| EPI_ISL_2566238, EPI_ISL_2566240, EPI_ISL_3342048                                                                                                                                                                                                                                                                                                                                                                                                                                                                                                                                                                                                                                                                                                                                                                                                                                                                                                                                                                                                                                                                                                                                                                                                                                                                                                                                                                                                                                                                                                                                                                                                                                                                                                                                                                                                                                                                                                                                                                                                                                                                                                                                                                                                                                                                 | SC (UCO) Igiene e Sanità Pubblica, ASUGI, Trieste                              | ARGO Laboratorio Genomica ed Epigenomica                                                                                                                                                                                                   | Barbone F; Braida C; Busetti M; D'Agaro P; Dal Monego S; Degasperì M; Licastro D; Maggiore A; Marcello A; Pisciain E; Segat L                                                                                                                                                                                                                                                                                                                                                                                                                                                                                                            |  |
| EPI_ISL_3813740                                                                                                                                                                                                                                                                                                                                                                                                                                                                                                                                                                                                                                                                                                                                                                                                                                                                                                                                                                                                                                                                                                                                                                                                                                                                                                                                                                                                                                                                                                                                                                                                                                                                                                                                                                                                                                                                                                                                                                                                                                                                                                                                                                                                                                                                                                   | SD Public Health Laboratory                                                    | Centers for Disease Control and Prevention Division of Viral Diseases, Pathogen Discovery                                                                                                                                                  | Alex Burgin; Ben Rambo-Martin; Clinton Paden; Dakota Howard; Dave Wentworth; Dhwani Batra; Jasmine Padilla; Justin Lee; Krista Queen; Kristen Knipe; Kristine Lacey; Mark Burroughs; Matthew Schmerer; Meghan Bentz; Mill Sheth; Peter Cook; Sam Shepard; Sarah Nobles; Suxiang Tong; Vivien Dugan; Yvette Unoarumhi                                                                                                                                                                                                                                                                                                                     |  |
| EPI_ISL_3579329, EPI_ISL_3579330                                                                                                                                                                                                                                                                                                                                                                                                                                                                                                                                                                                                                                                                                                                                                                                                                                                                                                                                                                                                                                                                                                                                                                                                                                                                                                                                                                                                                                                                                                                                                                                                                                                                                                                                                                                                                                                                                                                                                                                                                                                                                                                                                                                                                                                                                  | SECRETARIA MUNICIPAL DE SAUDE DE SANTA BARBARA D OESTE                         | Instituto Butantan                                                                                                                                                                                                                         | Antonio Jorge Martins; Claudia Renata dos Santos Barros; David Schlessinger; Debora Botequiu Moretti; Dimas Tadeu Covas; Elaine Cristina Marquezue; Elaine Vieira Santos; Evandra Strazza Rodrigues; Heidge Fukumasu; Jayme Augusto de Souza-Neto; José Salvatore Leister Patané; Luiz Alcantara; Luiz Lehmann Coutinho; Maria Carolina Elias; Mauricio Lacerda Nogueira; Rafael dos Santos Bezerra; Raul Machado Neto; Rejane Maria Tommasini Grotto; Ricardo Haddad; Sandra Cocuzzo Sampaio Vessoni; Simone Kashima; Svetoslav Nanev Slavov; Vincent Louis Viala                                                                       |  |
| EPI_ISL_5143505, EPI_ISL_5143510, EPI_ISL_5923360                                                                                                                                                                                                                                                                                                                                                                                                                                                                                                                                                                                                                                                                                                                                                                                                                                                                                                                                                                                                                                                                                                                                                                                                                                                                                                                                                                                                                                                                                                                                                                                                                                                                                                                                                                                                                                                                                                                                                                                                                                                                                                                                                                                                                                                                 | SOMER                                                                          | Laboratorio Departamental de Salud Publica de Antioquia                                                                                                                                                                                    | Ana Victoria Valencia Duarte; Cristian Arbey Velarde Hoyos; Gloria Isabel Escobar; Idabely Betancur Ortiz; Juan P. Hernandez-Ortiz; Juan Pablo Isaza Agudelo; Maria Stella López                                                                                                                                                                                                                                                                                                                                                                                                                                                         |  |
| EPI_ISL_2321627                                                                                                                                                                                                                                                                                                                                                                                                                                                                                                                                                                                                                                                                                                                                                                                                                                                                                                                                                                                                                                                                                                                                                                                                                                                                                                                                                                                                                                                                                                                                                                                                                                                                                                                                                                                                                                                                                                                                                                                                                                                                                                                                                                                                                                                                                                   | SOMER                                                                          | Universidad Nacional de Colombia - Laboratorio Genómico One Health                                                                                                                                                                         | Andres F. Cardona-Rios; Carlos Franco-Muñoz; Carolina Muñoz-Arango; Celeny Ortiz; Daniel O. Maldonado-Perez; Diego A. Álvarez-Díaz; Hector Alejandro Ruiz-Moreno; Idabely Betancur Ortiz; Jorge E. Osorio; Juan P. Hernandez-Ortiz; Karl A Ciuoderis; Katherine Laiton-Donato; Laura Silvana Perez; Lina M. Hurtado; Marcela Mercado-Reyes; Maria Angélica Maya; Maria Stella López; Rita Almanza Payares; Sandra Ines Cano; Simón Villegas Velásquez                                                                                                                                                                                    |  |
| EPI_ISL_5153140, EPI_ISL_5153141                                                                                                                                                                                                                                                                                                                                                                                                                                                                                                                                                                                                                                                                                                                                                                                                                                                                                                                                                                                                                                                                                                                                                                                                                                                                                                                                                                                                                                                                                                                                                                                                                                                                                                                                                                                                                                                                                                                                                                                                                                                                                                                                                                                                                                                                                  | SUNY Upstate Medical University                                                | SUNY Upstate Medical University                                                                                                                                                                                                            | Brian Pavlovitz; Frank Middleton                                                                                                                                                                                                                                                                                                                                                                                                                                                                                                                                                                                                         |  |
| EPI_ISL_4740109, EPI_ISL_4740110, EPI_ISL_4740111, EPI_ISL_4940483, EPI_ISL_4940486, EPI_ISL_5781627, EPI_ISL_5781629                                                                                                                                                                                                                                                                                                                                                                                                                                                                                                                                                                                                                                                                                                                                                                                                                                                                                                                                                                                                                                                                                                                                                                                                                                                                                                                                                                                                                                                                                                                                                                                                                                                                                                                                                                                                                                                                                                                                                                                                                                                                                                                                                                                             |                                                                                |                                                                                                                                                                                                                                            |                                                                                                                                                                                                                                                                                                                                                                                                                                                                                                                                                                                                                                          |  |
| see above                                                                                                                                                                                                                                                                                                                                                                                                                                                                                                                                                                                                                                                                                                                                                                                                                                                                                                                                                                                                                                                                                                                                                                                                                                                                                                                                                                                                                                                                                                                                                                                                                                                                                                                                                                                                                                                                                                                                                                                                                                                                                                                                                                                                                                                                                                         | SURA                                                                           | Gencore - Universidad de los Andes                                                                                                                                                                                                         | Cristian Barrera; David González; Felipe Báez; Gabriela Ariza; Luisa Sacristan; Marcela Guevara; Marcela Mercado; Silvia Restrepo                                                                                                                                                                                                                                                                                                                                                                                                                                                                                                        |  |
| EPI_ISL_2674306, EPI_ISL_2674307, EPI_ISL_2674308                                                                                                                                                                                                                                                                                                                                                                                                                                                                                                                                                                                                                                                                                                                                                                                                                                                                                                                                                                                                                                                                                                                                                                                                                                                                                                                                                                                                                                                                                                                                                                                                                                                                                                                                                                                                                                                                                                                                                                                                                                                                                                                                                                                                                                                                 | SURA                                                                           | Instituto Nacional de Salud- Dirección de Investigación en Salud Pública                                                                                                                                                                   | Carlos Franco-Muñoz; Carmen Osorio; Diana Malo; Diego A. Álvarez-Díaz; Diego Andrés Prada; Gerardo Santamaría; Hector Alejandro Ruiz-Moreno; Jhonattan Reales-González; Jorge Rivera; Juan Camilo Martínez; Julian Naizaque; Katherine Laiton-Donato; Lisseth Pardo; Magdalena Wiesner; Marcela Mercado-Reyes; Maria T. Herrera-Sepúlveda; Marta Lopez Blanco; Martha Lucia Ospina Martínez; Paola Rojas; Sergio Gomez; Sheryll Corchuelo; Ángela Alarcon Cruz                                                                                                                                                                           |  |
| EPI_ISL_4960521, EPI_ISL_4984587, EPI_ISL_4984617, EPI_ISL_4984622, EPI_ISL_5143502, EPI_ISL_5143503, EPI_ISL_5143504, EPI_ISL_6512571, EPI_ISL_6512572, EPI_ISL_6512573, EPI_ISL_6575523                                                                                                                                                                                                                                                                                                                                                                                                                                                                                                                                                                                                                                                                                                                                                                                                                                                                                                                                                                                                                                                                                                                                                                                                                                                                                                                                                                                                                                                                                                                                                                                                                                                                                                                                                                                                                                                                                                                                                                                                                                                                                                                         |                                                                                |                                                                                                                                                                                                                                            |                                                                                                                                                                                                                                                                                                                                                                                                                                                                                                                                                                                                                                          |  |
| see above                                                                                                                                                                                                                                                                                                                                                                                                                                                                                                                                                                                                                                                                                                                                                                                                                                                                                                                                                                                                                                                                                                                                                                                                                                                                                                                                                                                                                                                                                                                                                                                                                                                                                                                                                                                                                                                                                                                                                                                                                                                                                                                                                                                                                                                                                                         | SURA                                                                           | Laboratorio Departamental de Salud Publica de Antioquia                                                                                                                                                                                    | Ana Victoria Valencia Duarte; Andres F. Cardona-Rios; Cristian Arbey Velarde Hoyos; Gloria Isabel Escobar; Idabely Betancur Ortiz; Juan P. Hernandez-Ortiz; Juan Pablo Isaza Agudelo; Maria Stella López                                                                                                                                                                                                                                                                                                                                                                                                                                 |  |
| EPI_ISL_5152640, EPI_ISL_5152646, EPI_ISL_5152647, EPI_ISL_5152648, EPI_ISL_5152649, EPI_ISL_5152650, EPI_ISL_5152651, EPI_ISL_5152652, EPI_ISL_5152653, EPI_ISL_5152654, EPI_ISL_5152655, EPI_ISL_5152656, EPI_ISL_5152657, EPI_ISL_5152658, EPI_ISL_5152659, EPI_ISL_5152660, EPI_ISL_5152661, EPI_ISL_5152662, EPI_ISL_5152663, EPI_ISL_5152664, EPI_ISL_5152665, EPI_ISL_5152666, EPI_ISL_5152667, EPI_ISL_5152668, EPI_ISL_5152669, EPI_ISL_5152670, EPI_ISL_5152671, EPI_ISL_5152672, EPI_ISL_5152673, EPI_ISL_5152674, EPI_ISL_5152675, EPI_ISL_5152676, EPI_ISL_5152677, EPI_ISL_5152678, EPI_ISL_5152679, EPI_ISL_5152680, EPI_ISL_5152688                                                                                                                                                                                                                                                                                                                                                                                                                                                                                                                                                                                                                                                                                                                                                                                                                                                                                                                                                                                                                                                                                                                                                                                                                                                                                                                                                                                                                                                                                                                                                                                                                                                               |                                                                                |                                                                                                                                                                                                                                            |                                                                                                                                                                                                                                                                                                                                                                                                                                                                                                                                                                                                                                          |  |
| see above                                                                                                                                                                                                                                                                                                                                                                                                                                                                                                                                                                                                                                                                                                                                                                                                                                                                                                                                                                                                                                                                                                                                                                                                                                                                                                                                                                                                                                                                                                                                                                                                                                                                                                                                                                                                                                                                                                                                                                                                                                                                                                                                                                                                                                                                                                         | SYNLAB                                                                         | CIAT, Laboratorio de Virologia                                                                                                                                                                                                             | Ana M. Leiva; Diana Lopez; Programa Nacional de Caracterización Genómica de SARS-CoV/2; Wilmerj. Cuellar                                                                                                                                                                                                                                                                                                                                                                                                                                                                                                                                 |  |
| EPI_ISL_5737540, EPI_ISL_5737552, EPI_ISL_5737559, EPI_ISL_5737564, EPI_ISL_5737572, EPI_ISL_5737576                                                                                                                                                                                                                                                                                                                                                                                                                                                                                                                                                                                                                                                                                                                                                                                                                                                                                                                                                                                                                                                                                                                                                                                                                                                                                                                                                                                                                                                                                                                                                                                                                                                                                                                                                                                                                                                                                                                                                                                                                                                                                                                                                                                                              | SYNLAB                                                                         | Corporación para Investigaciones Biológicas-CIB                                                                                                                                                                                            | Jeanneth Mosquera Rendon; Katterine Molina Hoyos; Marcela Mercado Reyes; Uriel A. Hurtado Paez                                                                                                                                                                                                                                                                                                                                                                                                                                                                                                                                           |  |
| EPI_ISL_4850564                                                                                                                                                                                                                                                                                                                                                                                                                                                                                                                                                                                                                                                                                                                                                                                                                                                                                                                                                                                                                                                                                                                                                                                                                                                                                                                                                                                                                                                                                                                                                                                                                                                                                                                                                                                                                                                                                                                                                                                                                                                                                                                                                                                                                                                                                                   | SYNLAB                                                                         | Instituto Nacional de Salud- Dirección de Investigación en Salud Pública                                                                                                                                                                   | Carlos Franco-Muñoz; Carmen Osorio; Diana Malo; Diego A. Álvarez-Díaz; Diego Andrés Prada; Gerardo Santamaría; Hector Alejandro Ruiz-Moreno; Jhonattan Reales-González; Jorge Rivera; Juan Camilo Martínez; Julian Naizaque; Katherine Laiton-Donato; Lisseth Pardo; Magdalena Wiesner; Marcela Mercado-Reyes; Maria T. Herrera-Sepúlveda; Marta Lopez Blanco; Martha Lucia Ospina Martínez; Paola Rojas; Sergio Gomez; Sheryll Corchuelo; Ángela Alarcon Cruz                                                                                                                                                                           |  |
| EPI_ISL_5202661, EPI_ISL_5202667, EPI_ISL_5202675, EPI_ISL_5202681, EPI_ISL_5202682, EPI_ISL_5202690, EPI_ISL_5202693, EPI_ISL_5202699, EPI_ISL_5202702, EPI_ISL_5202703, EPI_ISL_5202707, EPI_ISL_5202717, EPI_ISL_5202718, EPI_ISL_5202719, EPI_ISL_5202720, EPI_ISL_5202721, EPI_ISL_5202722, EPI_ISL_5202723, EPI_ISL_5202724, EPI_ISL_5202730, EPI_ISL_5202735, EPI_ISL_5202741, EPI_ISL_5202746, EPI_ISL_5202755, EPI_ISL_5202756                                                                                                                                                                                                                                                                                                                                                                                                                                                                                                                                                                                                                                                                                                                                                                                                                                                                                                                                                                                                                                                                                                                                                                                                                                                                                                                                                                                                                                                                                                                                                                                                                                                                                                                                                                                                                                                                           |                                                                                |                                                                                                                                                                                                                                            |                                                                                                                                                                                                                                                                                                                                                                                                                                                                                                                                                                                                                                          |  |
| see above                                                                                                                                                                                                                                                                                                                                                                                                                                                                                                                                                                                                                                                                                                                                                                                                                                                                                                                                                                                                                                                                                                                                                                                                                                                                                                                                                                                                                                                                                                                                                                                                                                                                                                                                                                                                                                                                                                                                                                                                                                                                                                                                                                                                                                                                                                         | SYNLAB                                                                         | LSPSDS                                                                                                                                                                                                                                     | Alejandro Gomez Lopez; Gabriela Delgado Murcia; Johana Hernandez Toloza; Marcela Castano Rodriguez; Marcela Mercado                                                                                                                                                                                                                                                                                                                                                                                                                                                                                                                      |  |
| EPI_ISL_4960529, EPI_ISL_4984942, EPI_ISL_4984948                                                                                                                                                                                                                                                                                                                                                                                                                                                                                                                                                                                                                                                                                                                                                                                                                                                                                                                                                                                                                                                                                                                                                                                                                                                                                                                                                                                                                                                                                                                                                                                                                                                                                                                                                                                                                                                                                                                                                                                                                                                                                                                                                                                                                                                                 | SYNLAB                                                                         | Laboratorio Departamental de Salud Publica de Antioquia                                                                                                                                                                                    | Andres F. Cardona-Rios; Cristian Arbey Velarde Hoyos; Gloria Isabel Escobar; Idabely Betancur Ortiz; Juan P. Hernandez-Ortiz; Maria Stella López                                                                                                                                                                                                                                                                                                                                                                                                                                                                                         |  |
| EPI_ISL_1960080, EPI_ISL_4551039, EPI_ISL_4551040, EPI_ISL_4551041, EPI_ISL_4551061, EPI_ISL_4878493, EPI_ISL_4878494, EPI_ISL_5032290, EPI_ISL_5032291, EPI_ISL_5032292, EPI_ISL_5032293, EPI_ISL_5032295, EPI_ISL_5032296, EPI_ISL_5032297, EPI_ISL_5032298                                                                                                                                                                                                                                                                                                                                                                                                                                                                                                                                                                                                                                                                                                                                                                                                                                                                                                                                                                                                                                                                                                                                                                                                                                                                                                                                                                                                                                                                                                                                                                                                                                                                                                                                                                                                                                                                                                                                                                                                                                                     |                                                                                |                                                                                                                                                                                                                                            |                                                                                                                                                                                                                                                                                                                                                                                                                                                                                                                                                                                                                                          |  |
| see above                                                                                                                                                                                                                                                                                                                                                                                                                                                                                                                                                                                                                                                                                                                                                                                                                                                                                                                                                                                                                                                                                                                                                                                                                                                                                                                                                                                                                                                                                                                                                                                                                                                                                                                                                                                                                                                                                                                                                                                                                                                                                                                                                                                                                                                                                                         | SYNLAB                                                                         | Universidad Nacional de Colombia - Laboratorio Genómico One Health                                                                                                                                                                         | Andres F. Cardona-Rios; Carlos Franco-Muñoz; Carolina Muñoz-Arango; Celeny Ortiz; Daniel O. Maldonado-Perez; Diego A. Alvarez-Díaz; Hector Alejandro Ruiz-Moreno; Idabely Betancur Ortiz; Jorge E. Osorio; Juan P. Hernandez-Ortiz; Karl A Ciuoderis; Katherine Laiton-Donato; Laura Silvana Perez; Lina M. Hurtado; Marcela Mercado-Reyes; Maria Angélica Maya; Maria Stella López; Rita Almanza Payares; Sandra Ines Cano; Simón Villegas Velásquez                                                                                                                                                                                    |  |
| EPI_ISL_5047154, EPI_ISL_5047180, EPI_ISL_5047210, EPI_ISL_5047228, EPI_ISL_5047234, EPI_ISL_5047242, EPI_ISL_5047254, EPI_ISL_5047288                                                                                                                                                                                                                                                                                                                                                                                                                                                                                                                                                                                                                                                                                                                                                                                                                                                                                                                                                                                                                                                                                                                                                                                                                                                                                                                                                                                                                                                                                                                                                                                                                                                                                                                                                                                                                                                                                                                                                                                                                                                                                                                                                                            |                                                                                |                                                                                                                                                                                                                                            |                                                                                                                                                                                                                                                                                                                                                                                                                                                                                                                                                                                                                                          |  |
| see above                                                                                                                                                                                                                                                                                                                                                                                                                                                                                                                                                                                                                                                                                                                                                                                                                                                                                                                                                                                                                                                                                                                                                                                                                                                                                                                                                                                                                                                                                                                                                                                                                                                                                                                                                                                                                                                                                                                                                                                                                                                                                                                                                                                                                                                                                                         | SYNLAB ANGEL DIAGNOSTICA                                                       | Universidad del Valle                                                                                                                                                                                                                      | Programa Nacional de Caracterización Genómica de SARS-CoV-2                                                                                                                                                                                                                                                                                                                                                                                                                                                                                                                                                                              |  |
| EPI_ISL_3276661                                                                                                                                                                                                                                                                                                                                                                                                                                                                                                                                                                                                                                                                                                                                                                                                                                                                                                                                                                                                                                                                                                                                                                                                                                                                                                                                                                                                                                                                                                                                                                                                                                                                                                                                                                                                                                                                                                                                                                                                                                                                                                                                                                                                                                                                                                   | Saint Francis Medical Center                                                   | Los Angeles County Public Health Laboratories                                                                                                                                                                                              | P. Hemarajata et al.                                                                                                                                                                                                                                                                                                                                                                                                                                                                                                                                                                                                                     |  |
| EPI_ISL_2178749, EPI_ISL_2178753, EPI_ISL_2178755, EPI_ISL_2341036, EPI_ISL_2341037, EPI_ISL_2341038, EPI_ISL_2341039, EPI_ISL_2617026, EPI_ISL_2617028, EPI_ISL_2617030, EPI_ISL_2617033, EPI_ISL_2779621, EPI_ISL_2779624, EPI_ISL_2779626, EPI_ISL_2779627, EPI_ISL_2779630, EPI_ISL_2790219, EPI_ISL_2790227, EPI_ISL_2928487, EPI_ISL_2928497, EPI_ISL_2928498, EPI_ISL_2928499, EPI_ISL_2928500, EPI_ISL_2928501, EPI_ISL_2928502, EPI_ISL_2928503, EPI_ISL_2970380, EPI_ISL_2970404, EPI_ISL_2970405, EPI_ISL_2970406, EPI_ISL_2970407, EPI_ISL_3062836, EPI_ISL_3062837, EPI_ISL_3062838, EPI_ISL_3062841, EPI_ISL_3062842, EPI_ISL_3062843, EPI_ISL_3062845, EPI_ISL_3062852, EPI_ISL_3062856, EPI_ISL_3062857, EPI_ISL_3062861, EPI_ISL_3062862, EPI_ISL_3160684                                                                                                                                                                                                                                                                                                                                                                                                                                                                                                                                                                                                                                                                                                                                                                                                                                                                                                                                                                                                                                                                                                                                                                                                                                                                                                                                                                                                                                                                                                                                        |                                                                                |                                                                                                                                                                                                                                            |                                                                                                                                                                                                                                                                                                                                                                                                                                                                                                                                                                                                                                          |  |



|                                                                                                                                                                                                                                                                                                                                                                                                                                                                                                                                                                                                  |                                                                                 |                                                                                                   |                                                                                                                                                                                                                                                                                                                                                                                                                                                                       |                                                                                                                                                                                                                                                                                                                                                                                               |
|--------------------------------------------------------------------------------------------------------------------------------------------------------------------------------------------------------------------------------------------------------------------------------------------------------------------------------------------------------------------------------------------------------------------------------------------------------------------------------------------------------------------------------------------------------------------------------------------------|---------------------------------------------------------------------------------|---------------------------------------------------------------------------------------------------|-----------------------------------------------------------------------------------------------------------------------------------------------------------------------------------------------------------------------------------------------------------------------------------------------------------------------------------------------------------------------------------------------------------------------------------------------------------------------|-----------------------------------------------------------------------------------------------------------------------------------------------------------------------------------------------------------------------------------------------------------------------------------------------------------------------------------------------------------------------------------------------|
| EPI_ISL_3160685, EPI_ISL_3160687, EPI_ISL_3160689, EPI_ISL_3160715, EPI_ISL_3160941, EPI_ISL_3160942, EPI_ISL_3160944, EPI_ISL_3160945, EPI_ISL_3160956, EPI_ISL_3160970, EPI_ISL_3160975, EPI_ISL_3160975, EPI_ISL_3162230, EPI_ISL_3162231, EPI_ISL_3162232, EPI_ISL_3162234, EPI_ISL_3162235, EPI_ISL_3162240, EPI_ISL_3162241, EPI_ISL_3162242, EPI_ISL_3162261, EPI_ISL_3371423, EPI_ISL_3371424, EPI_ISL_3371425, EPI_ISL_3573690, EPI_ISL_3573696, EPI_ISL_3573698, EPI_ISL_3573700, EPI_ISL_3743206, EPI_ISL_3743208, EPI_ISL_3827102, EPI_ISL_3827103, EPI_ISL_3827104, EPI_ISL_3778138 | see above                                                                       | Salud Digna                                                                                       | Instituto Nacional de Medicina Genómica                                                                                                                                                                                                                                                                                                                                                                                                                               | Abraham Campos-Romero; Blancas S; Cedro-Tanda A; Cisneros-Villanueva M; Cruz-Islas J; Escobar-Arrazola; Escobar-Arrazola MA; Gonzalez-Barrera D; Herrera-Montalvo LA.; Hidalgo-Miranda A; Luna-Ruiz Marco; M; Mendoza-Vargas A; Moreno-Camacho José Luis; Munguia-Garza P; Orjuela-Rodríguez M; Ramirez-Vega O; Rangel-DeLeon D; Reyes-Grajeda JP; Rodriguez-Gallegos Jorge; Yair Alfaro-Mora |
| EPI_ISL_3373987, EPI_ISL_3912484, EPI_ISL_3912523, EPI_ISL_4411204, EPI_ISL_4411277, EPI_ISL_4411503, EPI_ISL_4411648, EPI_ISL_4412074                                                                                                                                                                                                                                                                                                                                                                                                                                                           | see above                                                                       | Salud Digna, A.C                                                                                  | Andersen lab at Scripps Research                                                                                                                                                                                                                                                                                                                                                                                                                                      | Abraham Garcia Gil; Jose Luis Moreno Camacho; Marco Antonio Luna Ruiz-Esparza; Miguel A. Fernandez Rojas; SEARCH Alliance with Abraham Campos Romero                                                                                                                                                                                                                                          |
| EPI_ISL_3261746, EPI_ISL_3261747, EPI_ISL_3912912, EPI_ISL_3912916                                                                                                                                                                                                                                                                                                                                                                                                                                                                                                                               | San Diego County Public Health Laboratory                                       | Andersen lab at Scripps Research                                                                  | Brett Austin; Jovan Shephard; SEARCH Alliance San Diego with Ashleigh Murphy; SEARCH Alliance San Diego with Ashleigh Murphy and Brett Austin                                                                                                                                                                                                                                                                                                                         |                                                                                                                                                                                                                                                                                                                                                                                               |
| EPI_ISL_3261667, EPI_ISL_3261726, EPI_ISL_3544144, EPI_ISL_3913018, EPI_ISL_3913027                                                                                                                                                                                                                                                                                                                                                                                                                                                                                                              | Scripps Medical Laboratory                                                      | Andersen lab at Scripps Research                                                                  | Ellen Stefanski; Ian Mchardy; SEARCH Alliance San Diego with Michael Quigley                                                                                                                                                                                                                                                                                                                                                                                          |                                                                                                                                                                                                                                                                                                                                                                                               |
| EPI_ISL_2786900, EPI_ISL_3025887, EPI_ISL_3142978, EPI_ISL_3372669                                                                                                                                                                                                                                                                                                                                                                                                                                                                                                                               | Seattle Flu Study                                                               | Seattle Flu Study                                                                                 | Amanda Adler; Barry R. Lutz; Benjamin Pelle; Caitlin R. Wolf; Chris D. Frazier; Deborah A. Nickerson; Elisabeth Brandstetter; Erica Ryke; Helen Y. Chu; Janet A. Englund; Jay Shendure; Jeff Duchin; Jover Lee; Kairsten Fay; Karen Cowgill; Kirsten Lacombe; Lea M. Starita; Mark J. Rieder; Matthew Richardson; Matthew Thompson; Melissa Truong; Michael Boeckh; Michael Famulare; Misja Ilcisin; Peter D. Han; Stephanie Schrag; Thomas R. Sibley; Trevor Bedford |                                                                                                                                                                                                                                                                                                                                                                                               |
| EPI_ISL_3098720, EPI_ISL_3098721, EPI_ISL_3098722, EPI_ISL_3098723, EPI_ISL_3098724, EPI_ISL_3098725, EPI_ISL_3098726, EPI_ISL_3098727                                                                                                                                                                                                                                                                                                                                                                                                                                                           | see above                                                                       | Section of Microbiology Department of Molecular and Translational Medicine, University of Brescia | Alberto Zani; Anna Bertelli; Arnaldo Caruso; Francesca Caccuri; Giovanni Campisi; Serena Messali                                                                                                                                                                                                                                                                                                                                                                      |                                                                                                                                                                                                                                                                                                                                                                                               |
| EPI_ISL_4920267                                                                                                                                                                                                                                                                                                                                                                                                                                                                                                                                                                                  | Servicio Microbiología H.U. Dr. Negrín                                          | Servicio Microbiología H.U. Dr. Negrín                                                            | Ana Bordes Benitez; Bartolomé Gómez Arroyo; Francisco Javier Chamizo López                                                                                                                                                                                                                                                                                                                                                                                            |                                                                                                                                                                                                                                                                                                                                                                                               |
| EPI_ISL_2179709, EPI_ISL_2179750, EPI_ISL_2179751                                                                                                                                                                                                                                                                                                                                                                                                                                                                                                                                                | Servicio Microbiología Hospital La Paz                                          | Servicio Microbiología Hospital La Paz                                                            | Elie Dahdouh; Fernando Lázaro; Jesús Mingorance Cruz; Rubén Cáceres                                                                                                                                                                                                                                                                                                                                                                                                   |                                                                                                                                                                                                                                                                                                                                                                                               |
| EPI_ISL_2558016, EPI_ISL_2558023, EPI_ISL_2689691, EPI_ISL_2758590, EPI_ISL_2758591, EPI_ISL_2960215, EPI_ISL_3219098, EPI_ISL_3315790, EPI_ISL_3315815, EPI_ISL_3432410                                                                                                                                                                                                                                                                                                                                                                                                                         | see above                                                                       | Servicio de Microbiología Hospital Ramon y Cajal                                                  | Galan JC; Martinez L. Abreu M; Ponce M; y Gonzalez-Alba JM                                                                                                                                                                                                                                                                                                                                                                                                            |                                                                                                                                                                                                                                                                                                                                                                                               |
| EPI_ISL_3265975, EPI_ISL_3265976                                                                                                                                                                                                                                                                                                                                                                                                                                                                                                                                                                 | Servicio de Microbiología Clínica (Complejo Hospitalario de Navarra, Pamplona)  | Centro de Secuenciación NASERTIC                                                                  | Ana Miqueleiz; Ana Navascués; Carmen Ezpeleta Baquedano                                                                                                                                                                                                                                                                                                                                                                                                               |                                                                                                                                                                                                                                                                                                                                                                                               |
| EPI_ISL_4561006                                                                                                                                                                                                                                                                                                                                                                                                                                                                                                                                                                                  | Servicio de Microbiología. Consorcio Hospital General Universitario de Valencia | SeqCOVID-SPAIN consortium/IBV(CSIC)                                                               | Begoña Fuster Escrivá; Carme Salvador García; Concepción Gimeno Cardona and SeqCOVID-SPAIN consortium; María Dolores Ocete; Rafael Medina González                                                                                                                                                                                                                                                                                                                    |                                                                                                                                                                                                                                                                                                                                                                                               |
| EPI_ISL_4561004, EPI_ISL_4561010, EPI_ISL_4561012                                                                                                                                                                                                                                                                                                                                                                                                                                                                                                                                                | Servicio de Microbiología. Hospital Clínico Universitario de Valencia           | SeqCOVID-SPAIN consortium/IBV(CSIC)                                                               | David Navarro Ortega; Eliseo Albert Vicent; Ignacio Torres and SeqCOVID-SPAIN consortium                                                                                                                                                                                                                                                                                                                                                                              |                                                                                                                                                                                                                                                                                                                                                                                               |
| EPI_ISL_4560999                                                                                                                                                                                                                                                                                                                                                                                                                                                                                                                                                                                  | Servicio de Microbiología. Hospital General Universitario de Castellón          | SeqCOVID-SPAIN consortium/IBV(CSIC)                                                               | María Dolores Tirado Balaguer and SeqCOVID-SPAIN consortium; Rosario Moreno Muñoz                                                                                                                                                                                                                                                                                                                                                                                     |                                                                                                                                                                                                                                                                                                                                                                                               |
| EPI_ISL_4704045, EPI_ISL_4704052, EPI_ISL_4704071, EPI_ISL_4704075                                                                                                                                                                                                                                                                                                                                                                                                                                                                                                                               | Servicios Medicos Olimpus                                                       | Laboratorio de Biología Molecular, Universidad Cooperativa de Colombia, Santa Marta               | Andrew S. Muñoz-Gamba; Daniel B. Ramirez-Osorio; José A. Usme-Ciro; Mayerlin Vasquez Cardenas; Paula A. Quintero-Cortés; Pricelis Paulin Polanco Fontalvo                                                                                                                                                                                                                                                                                                             |                                                                                                                                                                                                                                                                                                                                                                                               |
| EPI_ISL_3230223, EPI_ISL_3230224                                                                                                                                                                                                                                                                                                                                                                                                                                                                                                                                                                 | Servizo de Microbiología. Complejo Hospitalario de Santiago de Compostela       | Servizo de Microbiología. Complejo Hospitalario de Santiago de Compostela                         | Amparo Coira; Antonio Aguilera; Carlos García Riestra; Daniel Navarro; Gema Barbeito; José Llovo; Laura Millán; Manuela Hernández; María Luisa Pérez del Molino; Mercedes Treviño; Rocío trastoy; Teresa Lopez Valiño; Xosé Costa                                                                                                                                                                                                                                     |                                                                                                                                                                                                                                                                                                                                                                                               |
| EPI_ISL_3215933, EPI_ISL_3216042, EPI_ISL_3216104, EPI_ISL_3261325, EPI_ISL_3261330, EPI_ISL_3261400, EPI_ISL_3261401, EPI_ISL_3261432, EPI_ISL_3261440, EPI_ISL_3261444, EPI_ISL_3261452, EPI_ISL_3261454, EPI_ISL_3261456, EPI_ISL_3261479, EPI_ISL_3373781, EPI_ISL_3373784, EPI_ISL_3373786, EPI_ISL_3373797, EPI_ISL_3373813, EPI_ISL_3373816, EPI_ISL_3373943, EPI_ISL_3373946, EPI_ISL_3373961, EPI_ISL_3543711, EPI_ISL_3543997, EPI_ISL_3757002, EPI_ISL_3757023, EPI_ISL_3912670, EPI_ISL_4267901, EPI_ISL_4268405, EPI_ISL_4268471                                                    | see above                                                                       | Sharp HealthCare Laboratory                                                                       | Andersen lab at Scripps Research                                                                                                                                                                                                                                                                                                                                                                                                                                      | Art Mendoza; Cathy Woerle; Jacquelyn Berumen; Liam McGinnis; Omid Bakhtar; SEARCH Alliance San Diego with Aaron Harding                                                                                                                                                                                                                                                                       |
| EPI_ISL_2621189                                                                                                                                                                                                                                                                                                                                                                                                                                                                                                                                                                                  | Somer                                                                           | Universidad Nacional de Colombia - Laboratorio Genómico One Health                                | Andres F. Cardona-Rios; Carlos Franco-Muñoz; Carolina Muñoz-Arango; Celeny Ortiz; Daniel O. Maldonado-Perez; Diego A. Álvarez-Díaz; Hector Alejandro Ruiz-Moreno; Idabely Betancur Ortiz; Jorge E. Osorio; Juan P. Hernandez-Ortiz; Karl A Ciuderis; Katherine Laiton-Donato; Laura Silvana Perez; Lina M. Hurtado; Marcela Mercado-Reyes; María Angélica Maya; María Stella López; Rita Almanza Payares; Sandra Ines Cano; Simón Villegas Velásquez                  |                                                                                                                                                                                                                                                                                                                                                                                               |
| EPI_ISL_4625059, EPI_ISL_4743981                                                                                                                                                                                                                                                                                                                                                                                                                                                                                                                                                                 | Sonoma County Public Health Lab                                                 | Sonoma County Public Health Laboratory                                                            | Carlos Gonzalez; Iryna Goraichuk; Lisa Critchett; Rachel Rees                                                                                                                                                                                                                                                                                                                                                                                                         |                                                                                                                                                                                                                                                                                                                                                                                               |
| EPI_ISL_3067416, EPI_ISL_3067417, EPI_ISL_3067418, EPI_ISL_3067419                                                                                                                                                                                                                                                                                                                                                                                                                                                                                                                               | Southern Nevada Public Health Laboratory                                        | Southern Nevada Public Health Laboratory                                                          | Michael Picker                                                                                                                                                                                                                                                                                                                                                                                                                                                        |                                                                                                                                                                                                                                                                                                                                                                                               |
| EPI_ISL_2875838, EPI_ISL_2769123, EPI_ISL_2769124                                                                                                                                                                                                                                                                                                                                                                                                                                                                                                                                                | Spital Limmattal<br>Spital Männedorf AG                                         | Institute of Medical Virology                                                                     | Alexandra Trkola; Annette Audigé; Catharine Aquino; Cyril Shah; Daniel Ehrsam; Gabriela Ziltener; Guido Bloemberg; Hubert Rehrauer; Isabel Stürmer; Joel Wirz; Jon Huder; Jürg Böni; Kevin Steiner; Maria Grünberg; Maryam Zaheri; Michael Huber; Riccarda Capaul; Stefan Schmutz; Verena Kufner; Weihong Qi                                                                                                                                                          |                                                                                                                                                                                                                                                                                                                                                                                               |
| EPI_ISL_3045364, EPI_ISL_3231558, EPI_ISL_3231561, EPI_ISL_3259958                                                                                                                                                                                                                                                                                                                                                                                                                                                                                                                               | Stadtsptial Triemli                                                             | Institute of Medical Virology                                                                     | Alexandra Trkola; Annette Audigé; Catharine Aquino; Cyril Shah; Daniel Ehrsam; Gabriela Ziltener; Guido Bloemberg; Hubert Rehrauer; Isabel Stürmer; Joel Wirz; Jon Huder; Jürg Böni; Kevin Steiner; Maria Grünberg; Maryam Zaheri; Michael Huber; Riccarda Capaul; Stefan Schmutz; Verena Kufner; Weihong Qi                                                                                                                                                          |                                                                                                                                                                                                                                                                                                                                                                                               |
| EPI_ISL_3050227, EPI_ISL_3050233, EPI_ISL_3236157, EPI_ISL_3236162, EPI_ISL_3390723, EPI_ISL_3390757, EPI_ISL_4237130, EPI_ISL_4237131, EPI_ISL_4496900, EPI_ISL_4496917, EPI_ISL_4496920                                                                                                                                                                                                                                                                                                                                                                                                        | see above                                                                       | Stanford Health Care                                                                              | Stanford University School of Medicine, Clinical Virology Laboratory                                                                                                                                                                                                                                                                                                                                                                                                  | Becky Jiang; Bernadette Troung; Daniel Solis; James Zehnder; Malaya K. Sahoo; Marmdouh Sibai; Nathan Hammond; Selamawit Bihon; Suzette Santos; and Benjamin A. Pinsky                                                                                                                                                                                                                         |
| EPI_ISL_3216261, EPI_ISL_3266039, EPI_ISL_3387276, EPI_ISL_3387303, EPI_ISL_3459492, EPI_ISL_3463719, EPI_ISL_3762522, EPI_ISL_3762550                                                                                                                                                                                                                                                                                                                                                                                                                                                           | see above                                                                       | State Hygienic Laboratory at the University of Iowa                                               | State Hygienic Laboratory at the University of Iowa                                                                                                                                                                                                                                                                                                                                                                                                                   | Anankar Kampooowale; Anna Yakos; Benfer; Davis Rieckenberg; Erik Twait; Jeff; Kris Eveland; Kristen Zanon; Mariah Knutson; Valerie Reeb; Wes Hottel                                                                                                                                                                                                                                           |
| EPI_ISL_3307794, EPI_ISL_3307795, EPI_ISL_3307796, EPI_ISL_3307797, EPI_ISL_3307798, EPI_ISL_3307799, EPI_ISL_3307800, EPI_ISL_3307801, EPI_ISL_3307802, EPI_ISL_3307803, EPI_ISL_3307804, EPI_ISL_3307805, EPI_ISL_3307806, EPI_ISL_3307807, EPI_ISL_3307808, EPI_ISL_3307825, EPI_ISL_3307841, EPI_ISL_3307898, EPI_ISL_3307900, EPI_ISL_3307912, EPI_ISL_3307914, EPI_ISL_3307921, EPI_ISL_3307927                                                                                                                                                                                            | see above                                                                       | State Laboratories Division, Hawaii State Department of Health                                    | State Laboratories Division, Hawaii State Department of Health                                                                                                                                                                                                                                                                                                                                                                                                        | Ayana Garnet; Daniel Strange; Drew Kuwazaki; Edward Desmond; Pamela O'Brien; Razvan Sultana                                                                                                                                                                                                                                                                                                   |
| EPI_ISL_2489769, EPI_ISL_2489770, EPI_ISL_2489779, EPI_ISL_2489789, EPI_ISL_2489793, EPI_ISL_2489795, EPI_ISL_2489797, EPI_ISL_2489798, EPI_ISL_2489800, EPI_ISL_2489804, EPI_ISL_2835228, EPI_ISL_2835229, EPI_ISL_2835230, EPI_ISL_2835231, EPI_ISL_2835232, EPI_ISL_2835233, EPI_ISL_2835234, EPI_ISL_3216725, EPI_ISL_3216727                                                                                                                                                                                                                                                                | see above                                                                       | State Testing Facility                                                                            | Altius Institute for Biomedical Research                                                                                                                                                                                                                                                                                                                                                                                                                              | Alex Isner; Alex Nguyen; Amanda Gale; Audra Johnson; Clem Green; Daniel Bates; Eric Thorland; Jacob Rodriguez; Jean Robinson; Jemma Nelson; Jessica Kunder; John Stamatoyannopoulos; Joshua Richards; Julia Wald; Kneshay Harper; Lauren Mitchell; Mark Frerker; Matt Hartman; Michael Buckley; Muhammad Halimun; Rebecca Bruders; Sadie Patraw; Sofia Olsson; Tobias Ragoczy                 |
| EPI_ISL_4296234                                                                                                                                                                                                                                                                                                                                                                                                                                                                                                                                                                                  | Sutter Santa Rosa Regional Hospital Lab                                         | Sonoma County Public Health Laboratory                                                            | Carlos Gonzalez; Iryna Goraichuk; Lisa Critchett; Rachel Rees                                                                                                                                                                                                                                                                                                                                                                                                         |                                                                                                                                                                                                                                                                                                                                                                                               |
| EPI_ISL_2621202                                                                                                                                                                                                                                                                                                                                                                                                                                                                                                                                                                                  | Synlab                                                                          | Universidad Nacional de Colombia - Laboratorio Genómico One Health                                | Andres F. Cardona-Rios; Carlos Franco-Muñoz; Carolina Muñoz-Arango; Celeny Ortiz; Daniel O. Maldonado-Perez; Diego A. Álvarez-Díaz; Hector Alejandro Ruiz-Moreno; Idabely Betancur Ortiz; Jorge E. Osorio; Juan P. Hernandez-Ortiz; Karl A Ciuderis; Katherine Laiton-Donato; Laura Silvana Perez; Lina M. Hurtado; Marcela Mercado-Reyes; María Angélica Maya; María Stella López; Rita Almanza Payares; Sandra Ines Cano; Simón Villegas Velásquez                  |                                                                                                                                                                                                                                                                                                                                                                                               |
| EPI_ISL_1935627                                                                                                                                                                                                                                                                                                                                                                                                                                                                                                                                                                                  | TEMPUS LABS INC                                                                 | Wadsworth Center, New York State Department of Health                                             | Alexis Russell; Catharine Prussing; Daryl M. Lamson; Erasmus Schneider; Erica Lasek-Nesselquist; John Kelly; Jonathan Pitnick; Kirsten St. George; Matthew Shudt; Melissa A Leisner; Navjot Singh                                                                                                                                                                                                                                                                     |                                                                                                                                                                                                                                                                                                                                                                                               |
| EPI_ISL_2673684                                                                                                                                                                                                                                                                                                                                                                                                                                                                                                                                                                                  | TN Division of Laboratory Services                                              | Genomics and Discovery, Respiratory Viruses Branch, Division of Viral                             | Adam Retchless; Anna Kelleher; Anna Uehara; Brian Lynch; Clinton R. Paden; Dhvani Batra; Haibin Wang; Han Jia Justin Ng; Jasmine Padilla; Jing Zhang; Justin Lee; Krista Queen; Mark Burroughs; Mii Sheth; Morgan Davis; Peter Cook; Rachel Marine; Sarah Nobles; Suxiang Tong; Tara Coalter; Yan Li; Ying Tao                                                                                                                                                        |                                                                                                                                                                                                                                                                                                                                                                                               |

| Diseases, Centers for Disease Control and Prevention                                |                                                                                                                                        |                                                                                                                                                                                                                    | Emily Smith on behalf of CDPH-COVIDNet and UCSF Center for Advanced Technology                                                                                                                                                                                                                                                                                                                                                                                                                                                                                                                                                                                                                                                                                                                                                                                                                                                                                                                                                                                                                                                                                                                                                                                                                                                                                                                                                                                                                                                                                                                                                                                              |
|-------------------------------------------------------------------------------------|----------------------------------------------------------------------------------------------------------------------------------------|--------------------------------------------------------------------------------------------------------------------------------------------------------------------------------------------------------------------|-----------------------------------------------------------------------------------------------------------------------------------------------------------------------------------------------------------------------------------------------------------------------------------------------------------------------------------------------------------------------------------------------------------------------------------------------------------------------------------------------------------------------------------------------------------------------------------------------------------------------------------------------------------------------------------------------------------------------------------------------------------------------------------------------------------------------------------------------------------------------------------------------------------------------------------------------------------------------------------------------------------------------------------------------------------------------------------------------------------------------------------------------------------------------------------------------------------------------------------------------------------------------------------------------------------------------------------------------------------------------------------------------------------------------------------------------------------------------------------------------------------------------------------------------------------------------------------------------------------------------------------------------------------------------------|
| EPI_ISL_5630120                                                                     | TPMG Regional Laboratory                                                                                                               | California Department of Public Health                                                                                                                                                                             | Alex Burgin; Ben L. Rambo-Martin; Clinton R. Paden; Dakota Howard; Dave Wentworth; Dhvani Batra; Jasmine Padilla; Justin Lee; Krista Queen; Kristen Knipe; Kristine Lacek; Mark Burroughs; Matthew Schmeier; Meghan Bentz; Mili Sheth; Peter Cook; Sam Shepard; Sarah Nobles; Suxiang Tong; Vivien Dugan; Yvette Unoarumhi                                                                                                                                                                                                                                                                                                                                                                                                                                                                                                                                                                                                                                                                                                                                                                                                                                                                                                                                                                                                                                                                                                                                                                                                                                                                                                                                                  |
| EPI_ISL_3305771, EPI_ISL_3305772, EPI_ISL_3305773                                   | TX-Houston Health Department Laboratory                                                                                                | Centers for Disease Control and Prevention Division of Viral Diseases, Pathogen Discovery                                                                                                                          |                                                                                                                                                                                                                                                                                                                                                                                                                                                                                                                                                                                                                                                                                                                                                                                                                                                                                                                                                                                                                                                                                                                                                                                                                                                                                                                                                                                                                                                                                                                                                                                                                                                                             |
| EPI_ISL_3384146, EPI_ISL_4060851                                                    | TXDSHS                                                                                                                                 | TXDSHS                                                                                                                                                                                                             | Anita Pokharel; Bonnie Oh; Chun Wang; Grace Kubin; Jenny Zhang; Karen Bobier; Lorraine Rodriguez; Maliha Rahman; Mayela Pedrueza; Myong Koag; Rachel Lee; Rashmi Tuladhar                                                                                                                                                                                                                                                                                                                                                                                                                                                                                                                                                                                                                                                                                                                                                                                                                                                                                                                                                                                                                                                                                                                                                                                                                                                                                                                                                                                                                                                                                                   |
| EPI_ISL_2754204, see above                                                          | EPI_ISL_2756522, EPI_ISL_2833698, Tampa General Hospital Esoteric Lab                                                                  | EPI_ISL_2833699, EPI_ISL_2833700, EPI_ISL_2833701, EPI_ISL_2833702, EPI_ISL_2833703, EPI_ISL_2833704, EPI_ISL_2833705, EPI_ISL_2833914, EPI_ISL_3061535, EPI_ISL_3462368, EPI_ISL_3270994, EPI_ISL_3721000         | Amorce Lima; Deanna Becker; Dominic Uy; Elaine Vendrone; Jon Faughn; Jorge Mecias-Frias; Katie Hurlless; Marci O'Driscoll; Suzane Silbert; Vicki Healer                                                                                                                                                                                                                                                                                                                                                                                                                                                                                                                                                                                                                                                                                                                                                                                                                                                                                                                                                                                                                                                                                                                                                                                                                                                                                                                                                                                                                                                                                                                     |
| EPI_ISL_2651119, EPI_ISL_2651120                                                    | Temporary Specimen Collection Centre at the AsiaWorld-Expo                                                                             | Hong Kong Department of Health                                                                                                                                                                                     | Alan K.L. Tsang; Dominic N.C. Tsang; Edman T.K. Lam; Ken H.L. Ng; Peter C.W. Yip; Rickjason C.W. Chan                                                                                                                                                                                                                                                                                                                                                                                                                                                                                                                                                                                                                                                                                                                                                                                                                                                                                                                                                                                                                                                                                                                                                                                                                                                                                                                                                                                                                                                                                                                                                                       |
| EPI_ISL_2135033, EPI_ISL_2501624, EPI_ISL_2893512, EPI_ISL_3149057, EPI_ISL_3149063 | Texas Children's Hospital                                                                                                              | Texas Children's Microbiome Center                                                                                                                                                                                 | Ila Singh; James Dunn; James Versalovic; Jennifer K. Spinler; Ruth Ann Luna                                                                                                                                                                                                                                                                                                                                                                                                                                                                                                                                                                                                                                                                                                                                                                                                                                                                                                                                                                                                                                                                                                                                                                                                                                                                                                                                                                                                                                                                                                                                                                                                 |
| EPI_ISL_4209374, EPI_ISL_3219140                                                    | The Jackson Laboratory<br>The Ohio State University Applied Microbiology Services Laboratory                                           | The Jackson Laboratory<br>The Ohio State University Applied Microbiology Services Laboratory                                                                                                                       | Adams M; Kelly K; Li L; Long E; Omerza G; Renzette N<br>Seth A. Faith PhD                                                                                                                                                                                                                                                                                                                                                                                                                                                                                                                                                                                                                                                                                                                                                                                                                                                                                                                                                                                                                                                                                                                                                                                                                                                                                                                                                                                                                                                                                                                                                                                                   |
| EPI_ISL_3276697                                                                     | Torrance Memorial Medical Center                                                                                                       | Los Angeles County Public Health Laboratories                                                                                                                                                                      | P. Hemarajata et al.                                                                                                                                                                                                                                                                                                                                                                                                                                                                                                                                                                                                                                                                                                                                                                                                                                                                                                                                                                                                                                                                                                                                                                                                                                                                                                                                                                                                                                                                                                                                                                                                                                                        |
| EPI_ISL_3246985, EPI_ISL_3308775                                                    | Tripler Army Medical Center Microbiology Department                                                                                    | Department of Clinical Investigation                                                                                                                                                                               | Catherine Ueyehara; Jonathan D'Ambrozio; Kendra Carter; Rachael Downham                                                                                                                                                                                                                                                                                                                                                                                                                                                                                                                                                                                                                                                                                                                                                                                                                                                                                                                                                                                                                                                                                                                                                                                                                                                                                                                                                                                                                                                                                                                                                                                                     |
| EPI_ISL_3866402, see above                                                          | EPI_ISL_3866404, EPI_ISL_3866406, EPI_ISL_3866408, EPI_ISL_3866410, EPI_ISL_3866448, EPI_ISL_4967467, EPI_ISL_4967473, EPI_ISL_4967474 | Department of Clinical Investigation                                                                                                                                                                               | Catherine Ueyehara; Jonathan D'Ambrozio; Kendra Carter; Rachael Downham                                                                                                                                                                                                                                                                                                                                                                                                                                                                                                                                                                                                                                                                                                                                                                                                                                                                                                                                                                                                                                                                                                                                                                                                                                                                                                                                                                                                                                                                                                                                                                                                     |
| EPI_ISL_4886521                                                                     | UAN-LANIA                                                                                                                              | Microbial Genomics Laboratory                                                                                                                                                                                      | ; Alejandra Garcia-Gasca; Alejandra Hernández-Terán; Alejandro Sánchez-Flores; Alfredo Herrera-Estrella; Alicia Ocaña-Mondragón; Andreu Comas-García; Angel Gustavo Salas-Lais; Antonio Loza Román; Bernardo Martínez-Miguel; Blanca Taboada; Brenda Irasema Maldonado-Meza; Bruno Gómez-Gil; Carla Ivón Herrera-Najera; Carlos F. Arias; Celia Boukadida; Clara Esperanza Santacruz-Tinoco; Concepción Grajales-Muñiz; Consorcio Mexicano de Vigilancia Genómica (COVIGen-Mex). Authors (in alphabetical order): Julio Elias Alvarado-Yaah; Cristóbal Cháidez-Quiroz; Céliida Duque Molina; Céliida Martínez- Rodríguez; Daniel Fregoso-Rueda; Daniel Lira Morales; Eduardo Becerri-Vargas; Fernando Fontove-Herrera; Fidencio Mejía-Nepomuceno; Francisco Pulido; Gloria Elena Espinosa-Ayala; Gloria María Molina-Salinas; Gloria Vazquez; Hector Esteban Paz-Juárez; Hector Montoya-Fuentes; Helen Haydee Fernanda Ramirez-Plascencia; Irvin González-López; Jean Pierre Gonzalez; Jesús Hernández; Joel Armando Vázquez-Pérez; LANIA-Nayarit; Iván Girón Pérez.; Jorge Salas-Hernández; José Antonio Enciso-Moreno; José Arturo Martínez-Orozco; José Esteban Muñoz-Medina; José de Jesús Nuñez-Contreras; Juan Bautista Chale-Dzul; Julissa Enciso-Ibarra; Luis Alberto Ochoa-Carrera; Margarita Matias-Florentino; Mario Mújica-Sánchez; Marissa Perez-García; María Guadalupe Santiago-Mauricio; María Guadalupe de Jesús Mireles-Rivera; Nely Sélem-Mojica; Pavel Isa; Ricardo Ciria Mercé; Ricardo Grande; Rosa María Gutiérrez Rios; Santiago Avila-Ríos; Selene Zárate; Susana Lopez; Verónica Mata-Haro; Victor Eduardo Garcia-Arias; Victor Hugo Borja-Aburto |
| EPI_ISL_5978100                                                                     | UC Davis Genome Center                                                                                                                 | UC Davis Genome Center                                                                                                                                                                                             | UC Davis                                                                                                                                                                                                                                                                                                                                                                                                                                                                                                                                                                                                                                                                                                                                                                                                                                                                                                                                                                                                                                                                                                                                                                                                                                                                                                                                                                                                                                                                                                                                                                                                                                                                    |
| EPI_ISL_3370451                                                                     | UC-Christus Clinical Hospital Laboratory                                                                                               | Laboratory of Molecular Virology, School of Medicine, Pontificia Universidad Católica de Chile                                                                                                                     | Ana Maira Guzman; Andres E. Munoz-Marcos; Catalina Pardo-Roa; Eileen Serrano; Erick Salinas; Estefany Poblete; Francisco Melo; Jorge Levican; Leonardo I. Almonacid; Maria Jose Avendano; Maria Patricia Vega; Rafael A. Medina; Ricardo Enrique de la Barra; Tamara Garcia-Salum                                                                                                                                                                                                                                                                                                                                                                                                                                                                                                                                                                                                                                                                                                                                                                                                                                                                                                                                                                                                                                                                                                                                                                                                                                                                                                                                                                                           |
| EPI_ISL_3236526, see above                                                          | EPI_ISL_3236562, EPI_ISL_3369778, UCC (Universidad Central del Caribe)                                                                 | EPI_ISL_3369783, EPI_ISL_3369784, Grubbaugh Lab - Yale School of Public Health                                                                                                                                     | EPI_ISL_3369786, EPI_ISL_3369787, EPI_ISL_3369788<br>Anderson Brito; Andrea Firpo; Annie Watkins; Chaney Kalinich; Chantal Vogels; David Rivera Aponte; Ernesto Vazquez; Fabiola Cruz-Lopez; Fabiola Fontanet; Isabel Ott; Jessica Rothman; Joseph Fauver; Karolane Gonzalez; Kendall Billig; Mallery Breban; Mary Petrone; Natalie Machargo; Nathan Grubaugh; Patricia Serrano; Tania Mitwalli; Tara Alpert; Tobias Koch; Vianca Aponte                                                                                                                                                                                                                                                                                                                                                                                                                                                                                                                                                                                                                                                                                                                                                                                                                                                                                                                                                                                                                                                                                                                                                                                                                                    |
| EPI_ISL_1960082                                                                     | UDEA                                                                                                                                   | Universidad Nacional de Colombia - Laboratorio Genómico One Health                                                                                                                                                 | Andres F. Cardona-Rios; Carlos Franco-Muñoz; Carolina Muñoz-Arango; Celeny Ortiz; Daniel O. Maldonado-Perez; Diego A. Álvarez-Díaz; Hector Alejandro Ruiz-Moreno; Idabely Betancur Ortiz; Jorge E. Osorio; Juan P. Hernandez-Ortiz; Karl A Ciuderis; Katherine Laiton-Donato; Laura Silvana Perez; Lina M. Hurtado; Marcela Mercado-Reyes; Maria Angélica Maya; Maria Stella López; Rita Almanza Payares; Sandra Ines Cano; Simón Villegas Velásquez                                                                                                                                                                                                                                                                                                                                                                                                                                                                                                                                                                                                                                                                                                                                                                                                                                                                                                                                                                                                                                                                                                                                                                                                                        |
| EPI_ISL_2661542, EPI_ISL_3462091, EPI_ISL_3462092                                   | UHTL, University Hospitals                                                                                                             | UHTL, University Hospitals                                                                                                                                                                                         | Alouani, D.; Sadri, N.; Song, X.                                                                                                                                                                                                                                                                                                                                                                                                                                                                                                                                                                                                                                                                                                                                                                                                                                                                                                                                                                                                                                                                                                                                                                                                                                                                                                                                                                                                                                                                                                                                                                                                                                            |
| EPI_ISL_3071377                                                                     | ULS Castelo Branco                                                                                                                     | Instituto Nacional de Saude (INSA)                                                                                                                                                                                 | Borges et al                                                                                                                                                                                                                                                                                                                                                                                                                                                                                                                                                                                                                                                                                                                                                                                                                                                                                                                                                                                                                                                                                                                                                                                                                                                                                                                                                                                                                                                                                                                                                                                                                                                                |
| EPI_ISL_2681041                                                                     | UM im. Karola Marcinkowskiego w Poznaniu Laboratorium UCA_Covid-19 Centrum Biologii Medycznej                                          | 1. Tricity SARS-CoV-2 sequencing consortium; University of Gdansk, Medical University of Gdansk, Vaxican Ltd., Invicta Ltd. 2. National Institute of Public Health - National Institute of Hygiene, Warsaw, Poland | Celina Cybulska; Karolina Gackowska; Katarzyna Groth; Katarzyna Zacharczuk; Krystyna Bienkowska Szewczyk; Lukasz Rabalski; Maciej Grzybek; Maciej Kosinski; Magdalena Nowakowska; Marcin Lubocki; Malgorzata Sadkowska-Todys; Tomasz Wolkowicz                                                                                                                                                                                                                                                                                                                                                                                                                                                                                                                                                                                                                                                                                                                                                                                                                                                                                                                                                                                                                                                                                                                                                                                                                                                                                                                                                                                                                              |
| EPI_ISL_2321600, EPI_ISL_2321623, EPI_ISL_2321624                                   | UNIGEM                                                                                                                                 | Universidad Nacional de Colombia - Laboratorio Genómico One Health                                                                                                                                                 | Andres F. Cardona-Rios; Carlos Franco-Muñoz; Carolina Muñoz-Arango; Celeny Ortiz; Daniel O. Maldonado-Perez; Diego A. Álvarez-Díaz; Hector Alejandro Ruiz-Moreno; Idabely Betancur Ortiz; Jorge E. Osorio; Juan P. Hernandez-Ortiz; Karl A Ciuderis; Katherine Laiton-Donato; Laura Silvana Perez; Lina M. Hurtado; Marcela Mercado-Reyes; Maria Angélica Maya; Maria Stella López; Rita Almanza Payares; Sandra Ines Cano; Simón Villegas Velásquez                                                                                                                                                                                                                                                                                                                                                                                                                                                                                                                                                                                                                                                                                                                                                                                                                                                                                                                                                                                                                                                                                                                                                                                                                        |
| EPI_ISL_2645992, EPI_ISL_2810514, EPI_ISL_2810523, EPI_ISL_2895450                  | UNILABS                                                                                                                                | Instituto Nacional de Saude (INSA)                                                                                                                                                                                 | Borges et al                                                                                                                                                                                                                                                                                                                                                                                                                                                                                                                                                                                                                                                                                                                                                                                                                                                                                                                                                                                                                                                                                                                                                                                                                                                                                                                                                                                                                                                                                                                                                                                                                                                                |
| EPI_ISL_2810398                                                                     | UNILABS                                                                                                                                | Instituto Nacional de Saude (INSA) and BioSystems & Integrative Sciences Institute (BioISI) Genomics Unit, FCUL                                                                                                    | Borges et al                                                                                                                                                                                                                                                                                                                                                                                                                                                                                                                                                                                                                                                                                                                                                                                                                                                                                                                                                                                                                                                                                                                                                                                                                                                                                                                                                                                                                                                                                                                                                                                                                                                                |
| EPI_ISL_2796029, EPI_ISL_2796098, EPI_ISL_2796104                                   | UNILABS                                                                                                                                | Instituto Nacional de Saude (INSA) and Instituto Gulbenkian de Ciencia (IGC)                                                                                                                                       | Borges et al                                                                                                                                                                                                                                                                                                                                                                                                                                                                                                                                                                                                                                                                                                                                                                                                                                                                                                                                                                                                                                                                                                                                                                                                                                                                                                                                                                                                                                                                                                                                                                                                                                                                |
| EPI_ISL_5055355                                                                     | UNIVERSIDAD DE ANTIOQUIA                                                                                                               | Instituto Nacional de Salud- Dirección de Investigación en Salud Pública                                                                                                                                           | Beatriz de Arco; Carlos Franco-Muñoz; Carmen Osorio; Diana Malo; Diego A. Álvarez-Díaz; Diego Andrés Prada; Gerardo Santamaría; Hector Alejandro Ruiz-Moreno; Jhonatan Reales-González; Jorge Rivera; Juan Camilo Martínez; Julian Naizaque; Katherine Laiton-Donato; Lisseth Pardo; Magdalena Wiesner; Marcela Mercado-Reyes; Maria T. Herrera-Sepúlveda; Marta Lopez Blanco; Martha Lucia Ospina Martinez; Paola Rojas; Sergio Gomez; Sheryll Corchuelo; Tatiana Cobos; Ángela Alarcon Cruz                                                                                                                                                                                                                                                                                                                                                                                                                                                                                                                                                                                                                                                                                                                                                                                                                                                                                                                                                                                                                                                                                                                                                                               |
| EPI_ISL_5055405, EPI_ISL_5055411, EPI_ISL_5055413, EPI_ISL_5198503                  | UNIVERSIDAD DE ANTIOQUIA - LIME                                                                                                        | Instituto Nacional de Salud- Dirección de Investigación en Salud Pública                                                                                                                                           | Beatriz de Arco; Carlos Franco-Muñoz; Carmen Osorio; Diana Malo; Diego A. Álvarez-Díaz; Diego Andrés Prada; Gerardo Santamaría; Hector Alejandro Ruiz-Moreno; Jhonatan Reales-González; Jorge Rivera; Juan Camilo Martínez; Julian Naizaque; Katherine Laiton-Donato; Lisseth Pardo; Magdalena Wiesner; Marcela Mercado-Reyes; Maria T. Herrera-Sepúlveda; Marta Lopez Blanco; Martha Lucia Ospina Martinez; Paola Rojas; Sergio Gomez; Sheryll Corchuelo; Tatiana Cobos; Ángela Alarcon Cruz                                                                                                                                                                                                                                                                                                                                                                                                                                                                                                                                                                                                                                                                                                                                                                                                                                                                                                                                                                                                                                                                                                                                                                               |
| EPI_ISL_3631635, EPI_ISL_2919197                                                    | URMC LABS                                                                                                                              | URMC LABS<br>Wadsworth Center, New York State Department of Health                                                                                                                                                 | Andrew Cameron; Dwight Hardy; Ghinwa Dumyati; Kelly DeLary; Stepan Voljehn<br>Alexis Russell; Catharine Prussing; Daryl M. Lamson; Erasmus Schneider; Erica Lasek-Nesselquist; John Kelly; Jonathan Plitnick; Kirsten St. George; Matthew Shudt; Melissa A Leisner; Navjot Singh                                                                                                                                                                                                                                                                                                                                                                                                                                                                                                                                                                                                                                                                                                                                                                                                                                                                                                                                                                                                                                                                                                                                                                                                                                                                                                                                                                                            |
| EPI_ISL_4078492, see above                                                          | EPI_ISL_4078493, EPI_ISL_4078495, US Air Force School of Aerospace Medicine                                                            | EPI_ISL_4078508, EPI_ISL_4169304, US Air Force School of Aerospace Medicine                                                                                                                                        | EPI_ISL_4293521, EPI_ISL_4293523, EPI_ISL_4293525, EPI_ISL_4467292<br>Amanda Javorina; Anthony Fries; Carol Garrett; Clarise Starr; Deanna Muehleman; Elizabeth Macias; Jennifer Meyer; Kelsey Lanter; Sarah Purves; William Gruner                                                                                                                                                                                                                                                                                                                                                                                                                                                                                                                                                                                                                                                                                                                                                                                                                                                                                                                                                                                                                                                                                                                                                                                                                                                                                                                                                                                                                                         |
| EPI_ISL_2894589, EPI_ISL_3299042, EPI_ISL_3506334                                   | USC Clinical Lab                                                                                                                       | Los Angeles County Public Health Laboratories                                                                                                                                                                      | P. Hemarajata et al.                                                                                                                                                                                                                                                                                                                                                                                                                                                                                                                                                                                                                                                                                                                                                                                                                                                                                                                                                                                                                                                                                                                                                                                                                                                                                                                                                                                                                                                                                                                                                                                                                                                        |
| EPI_ISL_1849768, see above                                                          | EPI_ISL_2332833, EPI_ISL_3133307, UW Virology Lab                                                                                      | EPI_ISL_3161055, EPI_ISL_3161127, EPI_ISL_3161133, EPI_ISL_3161141, EPI_ISL_3161158, EPI_ISL_3369492, EPI_ISL_3369493, EPI_ISL_3369494, EPI_ISL_3370793, EPI_ISL_3370822, EPI_ISL_3507820                          | Alexander Greninger; Hong Xie; Keith R Jerome; Lasata Shrestha; Maria Lukes; Meel-Li Huang; Michelle Lin; Nathan Breit; Noah R. Baker; Patrick Mathias; Pavitra Roychoudhury; Ricardo Perez; Robert J. Livingston; Savanna S. Carmack; Sean Ellis; Shah Mohamed Bakhsh; Tien V. Nguyen                                                                                                                                                                                                                                                                                                                                                                                                                                                                                                                                                                                                                                                                                                                                                                                                                                                                                                                                                                                                                                                                                                                                                                                                                                                                                                                                                                                      |
| EPI_ISL_6121036                                                                     | Unidad de Diagnóstico Hemato Oncológico - UDHO                                                                                         | Laboratorio de biotecnología, Universidad Icesi                                                                                                                                                                    | Adrián Camilo Rodríguez Ararat; Diana M. Florez Giraldo; Marcela Mercado; María F. Villegas Torres; María I. Gutiérrez López; Paola A. Caicedo Burbano; Programa Nacional de Caracterización Genómica de SARS-CoV-2; Sara González Henao                                                                                                                                                                                                                                                                                                                                                                                                                                                                                                                                                                                                                                                                                                                                                                                                                                                                                                                                                                                                                                                                                                                                                                                                                                                                                                                                                                                                                                    |
| EPI_ISL_3568784                                                                     | Unidad de Investigación Medica de Yucatan (UIMY)                                                                                       | Unidad de Genomica Avanzada                                                                                                                                                                                        | ; Alejandra Garcia-Gasca; Alejandra Hernandez-Teran; Alejandro Sanchez-Flores; Alfredo Herrera-Estrella; Alicia Ocaña-Mondragon; Andreu Comas-García; Angel Gustavo Salas-Lais; Antonio Loza Roman; Bernardo Martínez-Miguel; Blanca Taboada; Brenda Irasema Maldonado-Meza; Bruno Gomez-Gil; Carla Ivon Herrera-Najera; Carlos F. Arias; Celia Boukadida; Celiida Duque Molina; Clara Esperanza Santacruz-Tinoco; Concepcion Grajales-Muñiz; Consorcio Mexicano de Vigilancia Genómica (COVIGen-Mex). Authors (in alphabetical order): Julio Elias Alvarado-Yaah; Cristobal Cháidez-Quiroz; Daniel Fregoso-Rueda; Daniel Lira Morales; Eduardo Becerri-Vargas; Fernando Fontove-Herrera; Fidencio Mejía-Nepomuceno; Francisco Pulido; Gloria Elena Espinosa-Ayala; Gloria María Molina-Salinas; Gloria Vazquez; Hector Esteban Paz-Juarez; Hector Montoya-Fuentes; Helen Haydee Fernanda Ramirez-Plascencia; Irvin Gonzalez-Lopez; Jean Pierre Gonzalez; Jesus Hernandez; Joel Armando Vazquez-Peréz.; Jorge Salas-Hernandez; Jose Antonio Enciso-Moreno; Jose Esteban Muñoz-Medina; Jose de Jesus Nuñez-Contreras; Juan Bautista Chale-Dzul; Julissa Enciso-Ibarra; Luis Alberto Ochoa-Carrera; Margarita Matias-Florentino; Maria Guadalupe Santiago-Mauricio; Maria Guadalupe de Jesus Mireles-Rivera; Mario Mujica-Sanchez; Marissa Perez-Garcia; Nely Sellem-Mojica; Pavel Isa; Ricardo Ciria Mercé; Ricardo Grande; Rosa María Gutierrez Rios; Santiago avila-Rios; Selene Zarate; Susana Lopez; Veronica Mata-Haro; Victor Eduardo Garcia-Arias; Victor Hugo Borja-Aburto                                                                                           |

|                                                                                                                                                                                                                                                                                                                                                                                                                                                          |                                                                               |                                                                                                                      |                                                                                                                                                                                                                                                                                                                                                                                                                                                                                                                                                                                                                                                                                                                                                                                                                                                                                                                                                                                                                                                                                                                                                                                                                                                                                                                                                                                                                                                                                                                                                                                                                                                                                        |
|----------------------------------------------------------------------------------------------------------------------------------------------------------------------------------------------------------------------------------------------------------------------------------------------------------------------------------------------------------------------------------------------------------------------------------------------------------|-------------------------------------------------------------------------------|----------------------------------------------------------------------------------------------------------------------|----------------------------------------------------------------------------------------------------------------------------------------------------------------------------------------------------------------------------------------------------------------------------------------------------------------------------------------------------------------------------------------------------------------------------------------------------------------------------------------------------------------------------------------------------------------------------------------------------------------------------------------------------------------------------------------------------------------------------------------------------------------------------------------------------------------------------------------------------------------------------------------------------------------------------------------------------------------------------------------------------------------------------------------------------------------------------------------------------------------------------------------------------------------------------------------------------------------------------------------------------------------------------------------------------------------------------------------------------------------------------------------------------------------------------------------------------------------------------------------------------------------------------------------------------------------------------------------------------------------------------------------------------------------------------------------|
| EPI_ISL_3556974,<br>EPI_ISL_3556975,<br>EPI_ISL_3556976                                                                                                                                                                                                                                                                                                                                                                                                  | Unidad de Investigación Médica de Yucatán (UIMY)                              | Centro de Investigación en Enfermedades Infecciosas (CIENI), Instituto Nacional de Enfermedades Respiratorias (INER) | Alejandra García-Gasca; Alejandra Hernández-Terán; Alejandro Sánchez-Flores; Alfredo Herrera-Estrella; Alicia Ocaña-Mondragón; Andreu Comas-García; Angel Gustavo Salas-Lais; Antonio Loza Román; Bernardo Martínez-Miguel; Blanca Taboada; Brenda Irasema Maldonado-Meza; Bruno Gómez-Gil; Carla Ivón Herrera-Najera; Carlos F. Arias; Celia Boukadida; Clara Esperanza Santacruz-Tinoco; Concepción Grajales-Muñiz; Consorcio Mexicano de Vigilancia Genómica (CoViGen-Mex). Authors (in alphabetical order): Julio Elias Alvarado-Yaah; Cristóbal Cháidez-Quiróz; Céliida Duque Molina; Céliida Martínez- Rodríguez; Daniel Fregoso-Rueda; Daniel Lira Morales; Eduardo Becerril-Vargas; Fernando Fontove-Herrera; Fidencio Mejía-Nepomuceno; Francisco Pulido; Gloria Elena Espinosa-Ayala; Gloria María Molina-Salinas; Hector Esteban Paz-Juárez; Hector Montoya-Fuentes; Helen Haydee Fernanda Ramirez-Plascencia; Irvin González-López; Jean Pierre González; Jesús Hernández; Joel Armando Vázquez-Pérez.; Jorge Salas-Hernández; José Antonio Enciso-Moreno; José Arturo Martínez-Orozco; José Esteban Muñoz-Medina; José de Jesús Nuñez-Contreras; Juan Bautista Chale-Dzul; Julissa Enciso-Ibarra; Kathia Elizabeth Tapia-Díaz; Luis Alberto Ochoa-Carrera; Margarita Matías-Florentino; Mario Mújica-Sánchez; Marissa Perez-García; María Guadalupe Santiago-Mauricio; María Guadalupe de Jesús Mireles-Rivera; Nelly Sélem-Mojica; Pavel Isa; Ricardo Ciria Merce; Ricardo Grande; Rosa María Gutiérrez Rios; Santiago Avila-Rios; Selene Zárate; Susana Lopez; Verónica Mata-Haro; Victor Eduardo García-Arias; Victor Hugo Borja-Aburto                                |
| EPI_ISL_3133727,<br>EPI_ISL_4006315                                                                                                                                                                                                                                                                                                                                                                                                                      | Unidad de Investigación Médica de Yucatán (UIMY)                              | Instituto de Biotecnología de la UNAM                                                                                | ; Alejandra García-Gasca; Alejandra Hernández-Terán; Alejandro Sánchez-Flores; Alfredo Herrera-Estrella; Alicia Ocaña-Mondragón; Andreu Comas-García; Angel Gustavo Salas-Lais; Antonio Loza Román; Bernardo Martínez-Miguel; Blanca Taboada; Brenda Irasema Maldonado-Meza; Bruno Gómez-Gil; Carla Ivón Herrera-Najera; Carlos F. Arias; Celia Boukadida; Clara Esperanza Santacruz-Tinoco; Concepción Grajales-Muñiz; Consorcio Mexicano de Vigilancia Genómica (CoViGen-Mex). Authors (in alphabetical order): Julio Elias Alvarado-Yaah; Cristóbal Cháidez-Quiróz; Céliida Duque Molina; Céliida Martínez- Rodríguez; Daniel Fregoso-Rueda; Daniel Lira Morales; Eduardo Becerril-Vargas; Fernando Fontove-Herrera; Fidencio Mejía-Nepomuceno; Francisco Pulido; Gloria Elena Espinosa-Ayala; Gloria María Molina-Salinas; Hector Esteban Paz-Juárez; Hector Montoya-Fuentes; Helen Haydee Fernanda Ramirez-Plascencia; Irvin González-López; Jean Pierre González; Jesús Hernández; Joel Armando Vázquez-Pérez.; Joel Armando Vázquez-Pérez.; Jorge Salas-Hernández; José Antonio Enciso-Moreno; José Arturo Martínez-Orozco; José Esteban Muñoz-Medina; José de Jesús Nuñez-Contreras; Juan Bautista Chale-Dzul; Julissa Enciso-Ibarra; Kathia Elizabeth Tapia-Díaz; Luis Alberto Ochoa-Carrera; Margarita Matías-Florentino; Mario Mújica-Sánchez; Marissa Perez-García; María Guadalupe Santiago-Mauricio; María Guadalupe de Jesús Mireles-Rivera; Nelly Sélem-Mojica; Pavel Isa; Ricardo Ciria Merce; Ricardo Grande; Rosa María Gutiérrez Rios; Santiago Avila-Rios; Selene Zárate; Susana Lopez; Verónica Mata-Haro; Victor Eduardo García-Arias; Victor Hugo Borja-Aburto |
| EPI_ISL_3505612,<br>EPI_ISL_3505613                                                                                                                                                                                                                                                                                                                                                                                                                      | Universidad Estatal de Bolívar                                                | Institute of Microbiology, Universidad San Francisco de Quito                                                        | Anita García; Belén Prado-Vivlar; Bernardo Gutiérrez; Carlos Julio Tobar; Erika B. Muñoz; Fernanda Zurita; Gabriel Trueba; Juan José Guadalupe; Karina Barragán; Michelle Grunauer; Monica Becerra-Vicung; Patricia Rojas-Silva; Paúl Cárdenas; René Bracho; Stephanie Arregui; Sully Márquez; Verónica Barragán                                                                                                                                                                                                                                                                                                                                                                                                                                                                                                                                                                                                                                                                                                                                                                                                                                                                                                                                                                                                                                                                                                                                                                                                                                                                                                                                                                       |
| EPI_ISL_4551012                                                                                                                                                                                                                                                                                                                                                                                                                                          | Universidad Nacional de Colombia - Laboratorio Genómico One Health            | Universidad Nacional de Colombia - Laboratorio Genómico One Health                                                   | Andres F. Cardona-Rios; Carlos Franco-Muñoz; Carolina Muñoz-Arangó; Celeny Ortiz; Daniel O. Maldonado-Perez; Diego A. Álvarez-Díaz; Hector Alejandro Ruiz-Moreno; Idabely Betancur Ortiz; Jorge E. Osorio; Juan P. Hernandez-Ortiz; Karl A Ciuderis; Katherine Laiton-Donato; Laura Silvana Perez; Lina M. Hurtado; Marcela Mercado-Reyes; Maria Angélica Maya; Maria Stella López; Rita Almanza Payares; Sandra Ines Cano; Simón Villegas Velásquez                                                                                                                                                                                                                                                                                                                                                                                                                                                                                                                                                                                                                                                                                                                                                                                                                                                                                                                                                                                                                                                                                                                                                                                                                                   |
| EPI_ISL_5195616,<br>EPI_ISL_5195617,<br>EPI_ISL_5195621,<br>EPI_ISL_5195622,<br>EPI_ISL_5887473,<br>EPI_ISL_5887477                                                                                                                                                                                                                                                                                                                                      | Universidad San Sebastian                                                     | "Facultad de Ciencias de la Vida, UNAB"                                                                              | "Claudio Meneses; Ariel Orellana"; Claudio Olmos; Daniel Leon; Dayan Sanhueza; Eduardo Castro; Gonzalo Campaña; Macarena Bastias; Paola Pidal; Ricardo Yusta; Sebastian Wolter; Susana Saez; Victor Monreal; Waldo Diaz                                                                                                                                                                                                                                                                                                                                                                                                                                                                                                                                                                                                                                                                                                                                                                                                                                                                                                                                                                                                                                                                                                                                                                                                                                                                                                                                                                                                                                                                |
| EPI_ISL_5199332                                                                                                                                                                                                                                                                                                                                                                                                                                          | Universidad de Caldas                                                         | Instituto Nacional de Salud- Dirección de Investigación en Salud Pública                                             | Beatriz de Arco; Carlos Franco-Muñoz; Carmen Osorio; Diana Malo; Diego A. Álvarez-Díaz; Diego Andrés Prada; Gerardo Santamaría; Hector Alejandro Ruiz-Moreno; Jhonnatan Reales-González; Jorge Rivera; Juan Camilo Martínez; Julian Naizaque; Katherine Laiton-Donato; Lisseth Pardo; Magdalena Wiesner; Marcela Mercado-Reyes; Maria T. Herrera-Sepúlveda; Marta Lopez Blanco; Martha Lucia Ospina Martínez; Paola Rojas; Sergio Gomez; Sheryll Corchuelo; Tatiana Cobos; Ángela Alarcon Cruz                                                                                                                                                                                                                                                                                                                                                                                                                                                                                                                                                                                                                                                                                                                                                                                                                                                                                                                                                                                                                                                                                                                                                                                         |
| EPI_ISL_5032294                                                                                                                                                                                                                                                                                                                                                                                                                                          | Universidad de Caldas                                                         | Universidad Nacional de Colombia - Laboratorio Genómico One Health                                                   | Andres F. Cardona-Rios; Carlos Franco-Muñoz; Carolina Muñoz-Arangó; Celeny Ortiz; Daniel O. Maldonado-Perez; Diego A. Álvarez-Díaz; Hector Alejandro Ruiz-Moreno; Idabely Betancur Ortiz; Jorge E. Osorio; Juan P. Hernandez-Ortiz; Karl A Ciuderis; Katherine Laiton-Donato; Laura Silvana Perez; Lina M. Hurtado; Marcela Mercado-Reyes; Maria Angélica Maya; Maria Stella López; Rita Almanza Payares; Sandra Ines Cano; Simón Villegas Velásquez                                                                                                                                                                                                                                                                                                                                                                                                                                                                                                                                                                                                                                                                                                                                                                                                                                                                                                                                                                                                                                                                                                                                                                                                                                   |
| EPI_ISL_5146267,<br>EPI_ISL_5146275                                                                                                                                                                                                                                                                                                                                                                                                                      | Universidad del Quindío                                                       | Laboratorio de Biología Molecular y Biotecnología - Universidad Tecnológica de Pereira                               | Augusto Zuluaga-Velez; Fredy A. Tabares-Villa; Juan C. Sepulveda; Juan D. Anacona-Montilla; Marcela Orjuela-Rodríguez                                                                                                                                                                                                                                                                                                                                                                                                                                                                                                                                                                                                                                                                                                                                                                                                                                                                                                                                                                                                                                                                                                                                                                                                                                                                                                                                                                                                                                                                                                                                                                  |
| EPI_ISL_4205080,<br>EPI_ISL_4205081,<br>EPI_ISL_4205082,<br>EPI_ISL_4205083                                                                                                                                                                                                                                                                                                                                                                              | Universidad del Rosario                                                       | Gencell Pharma                                                                                                       | Diego Andrés Otero-Rodríguez; Fabio Andrés Zapata-Gómez; Henry Mauricio Chaparral-Solano; Juan Mauricio Pardo-Oviedo; Jubby Marcela Gálvez-Bermúdez; Ludwig Luis Antonio Alborno; Nicolás Molano-González; Ángela María Pinzón-Rondón; Ángela María Ruiz-Sternberg                                                                                                                                                                                                                                                                                                                                                                                                                                                                                                                                                                                                                                                                                                                                                                                                                                                                                                                                                                                                                                                                                                                                                                                                                                                                                                                                                                                                                     |
| EPI_ISL_5065676,<br>EPI_ISL_5065677,<br>EPI_ISL_5065678                                                                                                                                                                                                                                                                                                                                                                                                  | Universidad del Sinú - Sede Cartagena                                         | Centro de Genética y Biología Molecular - Universidad del Magdalena                                                  | Andrea M. Ramírez Hernandez; Angel Oviedo Marquez; Daniel Bautista; Edison Lea-Ch; Lyda R. Castro; Maria Teresa Mojica-Ortiz                                                                                                                                                                                                                                                                                                                                                                                                                                                                                                                                                                                                                                                                                                                                                                                                                                                                                                                                                                                                                                                                                                                                                                                                                                                                                                                                                                                                                                                                                                                                                           |
| EPI_ISL_4419138, EPI_ISL_4419139, EPI_ISL_4419140, EPI_ISL_4419145, EPI_ISL_4419146, EPI_ISL_4419148, EPI_ISL_4419152, EPI_ISL_4419153, EPI_ISL_4419154, EPI_ISL_4419156, EPI_ISL_4419158, EPI_ISL_4419161, EPI_ISL_4419163, EPI_ISL_4419165, EPI_ISL_4419166, EPI_ISL_4419168, EPI_ISL_4419171, EPI_ISL_4419174, EPI_ISL_4419184, EPI_ISL_5858827, EPI_ISL_5858828, EPI_ISL_5858837, EPI_ISL_5858842, EPI_ISL_5858843, EPI_ISL_5858844, EPI_ISL_5858849 | Universidad del Valle, LDAB- Laboratorio de Diagnostico de Agentes Biologicos | Universidad del Valle                                                                                                | Andres Castillo; Beatriz Parra & Programa Nacional de Caracterización Genómica de SARS-CoV-2; Diana López-Alvarez; Erica M. Aristizabal; Flor Saa; Melissa Solarte; Nelson Rivera Franco; Programa Nacional de Caracterización Genómica de SARS-CoV-2                                                                                                                                                                                                                                                                                                                                                                                                                                                                                                                                                                                                                                                                                                                                                                                                                                                                                                                                                                                                                                                                                                                                                                                                                                                                                                                                                                                                                                  |
| EPI_ISL_3477561, EPI_ISL_3477563, EPI_ISL_3477564, EPI_ISL_3477565, EPI_ISL_3477568, EPI_ISL_3477569, EPI_ISL_3477570, EPI_ISL_3477571, EPI_ISL_3477572, EPI_ISL_3477573                                                                                                                                                                                                                                                                                 | see above                                                                     | Universidad del Valle, LDAB- Laboratorio de Diagnostico de Agentes Biologicos                                        | Andres Castillo; Beatriz Parra & COVID-19 Team Univalle; Diana López-Alvarez; Nelson Rivera Franco                                                                                                                                                                                                                                                                                                                                                                                                                                                                                                                                                                                                                                                                                                                                                                                                                                                                                                                                                                                                                                                                                                                                                                                                                                                                                                                                                                                                                                                                                                                                                                                     |
| EPI_ISL_2885486, EPI_ISL_2885495, EPI_ISL_2885496, EPI_ISL_2981946                                                                                                                                                                                                                                                                                                                                                                                       | University Hospitals of Geneva, Laboratory of Virology                        | HUG, Laboratory of Virology and the Health2030 Genome Center                                                         | Ana Rita Gonçalves; Deborah Penet; Emmanouil Dermitzakis; Henri Pegeot; Ioannis Xenarios; Keith Harshman; Laurent Kaiser; Lorenzo Cerutti; Melyssa Elies; Samuel Cordey                                                                                                                                                                                                                                                                                                                                                                                                                                                                                                                                                                                                                                                                                                                                                                                                                                                                                                                                                                                                                                                                                                                                                                                                                                                                                                                                                                                                                                                                                                                |
| EPI_ISL_3672676, EPI_ISL_3672677                                                                                                                                                                                                                                                                                                                                                                                                                         | University of Iowa Hospitals and Clinics                                      | State Hygienic Laboratory at the University of Iowa                                                                  | Alankar Kampoowale; Anna Yakos; Benfer; Davis Rieckenberg; Erik Twait; Jeff; Kris Eveland; Kristen Zanon; Mariah Knutson; Valerie Reeb; Wes Hottel                                                                                                                                                                                                                                                                                                                                                                                                                                                                                                                                                                                                                                                                                                                                                                                                                                                                                                                                                                                                                                                                                                                                                                                                                                                                                                                                                                                                                                                                                                                                     |
| EPI_ISL_3118412, EPI_ISL_3118413, EPI_ISL_3118414, EPI_ISL_3118415, EPI_ISL_3118416, EPI_ISL_3118417, EPI_ISL_3118418, EPI_ISL_3118419, EPI_ISL_3118420, EPI_ISL_3118421, EPI_ISL_3118422, EPI_ISL_3118423, EPI_ISL_3118424, EPI_ISL_3118425, EPI_ISL_3118426                                                                                                                                                                                            | see above                                                                     | University of Liège COVID-19 testing center                                                                          | Bouchra Boujemla; Claire Gourzonès; Cécile Meex; Keith Durkin; Laurent Gillet; Maria Artesi; Marie-Pierre Hayette; Nadine Cambisano; Nathalie Renotte; Olivier Ek; Sébastien Bontems; Vincent Bours                                                                                                                                                                                                                                                                                                                                                                                                                                                                                                                                                                                                                                                                                                                                                                                                                                                                                                                                                                                                                                                                                                                                                                                                                                                                                                                                                                                                                                                                                    |
| EPI_ISL_1827549, EPI_ISL_1827552, EPI_ISL_1827554, EPI_ISL_2833889, EPI_ISL_3117543                                                                                                                                                                                                                                                                                                                                                                      | University of Wisconsin-Madison AIDS Vaccine Research Laboratories            | University of Wisconsin-Madison AIDS Vaccine Research Laboratories                                                   | Gage Moreno; Katarina Braun; et al. AIDS Vaccine Research Laboratories                                                                                                                                                                                                                                                                                                                                                                                                                                                                                                                                                                                                                                                                                                                                                                                                                                                                                                                                                                                                                                                                                                                                                                                                                                                                                                                                                                                                                                                                                                                                                                                                                 |
| EPI_ISL_3259950                                                                                                                                                                                                                                                                                                                                                                                                                                          | Universität Zürich                                                            | Institute of Medical Virology                                                                                        | Alexandra Trkola; Annette Audigé; Catharine Aquino; Cyril Shah; Daniel Ehrsam; Gabriela Ziltener; Guido Bloemberg; Hubert Rehrauer; Isabel Stürmer; Joel Wirz; Jon Huder; Jürg Böni; Kevin Steiner; Maria Grünberg; Maryam Zaheer; Michael Huber; Riccarda Capaul; Stefan Schmutz; Verena Kufner; Weihong Qi                                                                                                                                                                                                                                                                                                                                                                                                                                                                                                                                                                                                                                                                                                                                                                                                                                                                                                                                                                                                                                                                                                                                                                                                                                                                                                                                                                           |
| EPI_ISL_2769134, EPI_ISL_2769148, EPI_ISL_2918872, EPI_ISL_2978325                                                                                                                                                                                                                                                                                                                                                                                       | UniversitätsSpital Zürich                                                     | Institute of Medical Virology                                                                                        | Alexandra Trkola; Annette Audigé; Cyril Shah; Gabriela Ziltener; Guido Bloemberg; Jon Huder; Jürg Böni; Kevin Steiner; Maria Grünberg; Maryam Zaheer; Michael Huber; Riccarda Capaul; Stefan Schmutz; Verena Kufner                                                                                                                                                                                                                                                                                                                                                                                                                                                                                                                                                                                                                                                                                                                                                                                                                                                                                                                                                                                                                                                                                                                                                                                                                                                                                                                                                                                                                                                                    |
| EPI_ISL_3743387                                                                                                                                                                                                                                                                                                                                                                                                                                          | Utah Public Health Laboratory                                                 | Utah Public Health Laboratory                                                                                        | Erin L. Young; Kelly F. Oakeson; Olinto Linares-Perdomo; Pooja Gupta                                                                                                                                                                                                                                                                                                                                                                                                                                                                                                                                                                                                                                                                                                                                                                                                                                                                                                                                                                                                                                                                                                                                                                                                                                                                                                                                                                                                                                                                                                                                                                                                                   |
| EPI_ISL_4760533                                                                                                                                                                                                                                                                                                                                                                                                                                          | Y20                                                                           | Y20                                                                                                                  | Amy Bauer; Jenny Lentz; Manjeet Khubbar; Nandhukumar Balakrishnan; Samantha Scott; Sanjib Bhattacharyya                                                                                                                                                                                                                                                                                                                                                                                                                                                                                                                                                                                                                                                                                                                                                                                                                                                                                                                                                                                                                                                                                                                                                                                                                                                                                                                                                                                                                                                                                                                                                                                |
| EPI_ISL_4458018                                                                                                                                                                                                                                                                                                                                                                                                                                          | VA-Division of Consolidated Laboratory Services                               | Centers for Disease Control and Prevention Division of Viral Diseases, Pathogen Discovery                            | Becky Tsai; Benafsh Sapra; Benjamin Rambo-Martin; Christopher Gulvick; Clinton Paden; Dakota Howard; Dhvani Batra; Doreen Ng; Duncan MacCannell; Erisa Sula; Harry Gao; James Xie; Jason Caravas; John Gao; Joseph Fierro; Kristine Lacey; Matthew Schmerer; Mickey Li; Peter Cook; Scott Sammons; Shatavia Morrison; Tymeckia Kendall; Victoria Caban Figueroa; Yan Meng; Yvette Unoarumhi                                                                                                                                                                                                                                                                                                                                                                                                                                                                                                                                                                                                                                                                                                                                                                                                                                                                                                                                                                                                                                                                                                                                                                                                                                                                                            |
| EPI_ISL_3236501, EPI_ISL_3369779, EPI_ISL_3369780, EPI_ISL_3369785                                                                                                                                                                                                                                                                                                                                                                                       | VIDOH (Virgin Islands Department of Health)                                   | Grubaguch Lab - Yale School of Public Health                                                                         | Anderson Brito; Annie Watkins; Brett Ellis; Chaney Kalinich; Chantal Vogels; Esther Ellis; Isabel Ott; Jendai Richards; Jessica Rothman; Joseph Fauver; Kendall Billig; Mallery Breban; Marlon Lawrence; Mary Petrone; Nathan Grubaguch; TaLesia Aderonmu; Tara Alpert; Tobias Koch                                                                                                                                                                                                                                                                                                                                                                                                                                                                                                                                                                                                                                                                                                                                                                                                                                                                                                                                                                                                                                                                                                                                                                                                                                                                                                                                                                                                    |
| EPI_ISL_5530601                                                                                                                                                                                                                                                                                                                                                                                                                                          | VIROLOGIA INS DRSP                                                            | Instituto Nacional de Salud- Dirección de Investigación en Salud Pública                                             | Beatriz de Arco; Carlos Franco-Muñoz; Diego A. Álvarez-Díaz; Diego Andrés Prada; Dioselina Peláez-Carvajal; Gerardo Santamaría; Héctor Alejandro Ruiz-Moreno; Jhonnatan Reales-González; Jorge Rivera; Julián Naizaque; Katherine Laiton-Donato; Marcela Mercado-Reyes.; Martha Lucia Ospina Martínez; María T. Herrera-Sepúlveda; Paola Rojas-Estevez; Sheryll Corchuelo; Tatiana Cobos                                                                                                                                                                                                                                                                                                                                                                                                                                                                                                                                                                                                                                                                                                                                                                                                                                                                                                                                                                                                                                                                                                                                                                                                                                                                                               |
| EPI_ISL_2379728, EPI_ISL_2420116, EPI_ISL_2521342, EPI_ISL_2521344, EPI_ISL_3717248                                                                                                                                                                                                                                                                                                                                                                      | Valais Hospital, Central Institute                                            | Valais Hospital, Central Institute                                                                                   | Alexis Dumoulin; Cedric Howald; Deborah Penet; Emmanouil Dermitzakis; Henri Pegeot; Ioannis Xenarios; Keith Harshman; Lorenzo Cerutti; Melyssa Elies                                                                                                                                                                                                                                                                                                                                                                                                                                                                                                                                                                                                                                                                                                                                                                                                                                                                                                                                                                                                                                                                                                                                                                                                                                                                                                                                                                                                                                                                                                                                   |
| EPI_ISL_2544315, EPI_ISL_2662426, EPI_ISL_2724442, EPI_ISL_2820613                                                                                                                                                                                                                                                                                                                                                                                       | Viollier AG                                                                   | Department of Biosystems Science and Engineering, ETH Zürich                                                         | Andrea Patrignani; Andrea Patrizia Salzmann; Andrea Cabral de Gouvea; Catharine Aquino; Chaoran Chen; Christian Beisel; Christiane Beckmann; Christoph Noppen; Daniel Ehrsam; Doris Popovic; Elodie Burcklen; Griffin White; Henriette Kurth; Ina Nissen; Isabel Stürmer; Ivan Topolsky; Jay Tracy; Kim Philipp Jablonski; Lara Fuhrmann; Laura Neff; Lennart Opitz; Maria Domenica Moccia; Maurice Mondrot; Mirjam Feldkamp; Natascha Christocoe; Niko Beerenwinkel; Olivier Kobel; Ralph Schlapbach; Rebecca Denes; Sarah Nadeau; Simon Grüter; Tanja Stadler; Timothy Sykes                                                                                                                                                                                                                                                                                                                                                                                                                                                                                                                                                                                                                                                                                                                                                                                                                                                                                                                                                                                                                                                                                                         |
| EPI_ISL_3214891, EPI_ISL_3214904, EPI_ISL_3214906, EPI_ISL_3214926, EPI_ISL_3667776, EPI_ISL_4296477, EPI_ISL_5064923                                                                                                                                                                                                                                                                                                                                    | see above                                                                     | Virginia Division of Consolidated Laboratory Services                                                                | Virginia Division of Consolidated Laboratory Services                                                                                                                                                                                                                                                                                                                                                                                                                                                                                                                                                                                                                                                                                                                                                                                                                                                                                                                                                                                                                                                                                                                                                                                                                                                                                                                                                                                                                                                                                                                                                                                                                                  |
| EPI_ISL_3305784, EPI_ISL_4201406                                                                                                                                                                                                                                                                                                                                                                                                                         | WI State Laboratory of Hygiene                                                | Centers for Disease Control and Prevention Division of Viral Diseases, Pathogen Discovery                            | Alex Burgin; Ben L. Rambo-Martin; Ben Rambo-Martin; Clinton Paden; Clinton R. Paden; Dakota Howard; Dave Wentworth; Dhvani Batra; Jasmine Padilla; Justin Lee; Krista Queen; Kristen Knipe; Kristine Lacey; Mark Burroughs; Matthew Schmerer; Meghan Bentz; Mili Sheth; Peter Cook; Sam Shepard; Sarah Nobles; Suxiang Tong; Vivien Dugan; Yvette Unoarumhi                                                                                                                                                                                                                                                                                                                                                                                                                                                                                                                                                                                                                                                                                                                                                                                                                                                                                                                                                                                                                                                                                                                                                                                                                                                                                                                            |
| EPI_ISL_3123368                                                                                                                                                                                                                                                                                                                                                                                                                                          | WSSE w Gdansk                                                                 | Wojewódzka Stacja Sanitarno-Epidemiologiczna w Olsztynie, Laboratorium Badan Epidemiologiczno-                       | Aleksandra Kobiatko; Barbara Dolinska; Emilia Tarabas; Ewa Liszewska; Marta Lukian; Monika Czerminska; Patryk Bielecki; Paulina Rozycka; Sylwia Krzetowska; Tomasz Jakubczak                                                                                                                                                                                                                                                                                                                                                                                                                                                                                                                                                                                                                                                                                                                                                                                                                                                                                                                                                                                                                                                                                                                                                                                                                                                                                                                                                                                                                                                                                                           |

| Klinicznyc                                                                                                                                                               |                                                                                                          |                                                                                                 |                                                                                                                                                                                                                                                                                                                                                                                                                                                                |
|--------------------------------------------------------------------------------------------------------------------------------------------------------------------------|----------------------------------------------------------------------------------------------------------|-------------------------------------------------------------------------------------------------|----------------------------------------------------------------------------------------------------------------------------------------------------------------------------------------------------------------------------------------------------------------------------------------------------------------------------------------------------------------------------------------------------------------------------------------------------------------|
| EPI_ISL_2790306,<br>EPI_ISL_2833852,<br>EPI_ISL_3216951,<br>EPI_ISL_3217002,<br>EPI_ISL_3673830                                                                          | Washington State<br>Department of Health Public<br>Health Laboratories                                   | Washington State Department of Health<br>Public Health Laboratories                             | Avi Singh; Darren Lucas; Denny Russell; Drew MacKellar; Geoff Melly; Hannah Gray; Joenice Gonzalez; JohnAric Peterson; Philip Dykema; Rebecca Cao; Vanessa De Los Santos                                                                                                                                                                                                                                                                                       |
| EPI_ISL_3246922,<br>EPI_ISL_3642651                                                                                                                                      | Weill Cornell Medicine                                                                                   | New York Genome Center                                                                          | Amy Baldwin; Andre Corvelo; Arryn Craney; Chris Mason; Dayna M. Oschwald; Hanna Rennert; Lars F Westblade; Margaret Elizabeth Ross; Melissa Cushing; Michael Zody; Olivier Elemento; Priya Velu; Samantha Fennessey; Tom Maniatis                                                                                                                                                                                                                              |
| EPI_ISL_3088502,<br>EPI_ISL_3088842                                                                                                                                      | Wichita State University -<br>Molecular Diagnostics Lab                                                  | Kansas Health and Environmental Lab                                                             | Ben Olsen; Jonathan Barnell; Katherine Wiggins; Mike Grose; and Phil Adam                                                                                                                                                                                                                                                                                                                                                                                      |
| EPI_ISL_3221217                                                                                                                                                          | Willis-Knighton Medical<br>Center Hospital Laboratory                                                    | LSUHS Emerging Viral Threat Laboratory                                                          | Alexander Mijalis; Andrew D. Yurochko; Christopher G. Kevili; Gregory L. Ware; Jennifer L. Carroll; Jeremy P. Kamil; John A. Vanchiere; Maarten Van Diest; Rona S. Scott                                                                                                                                                                                                                                                                                       |
| EPI_ISL_3234684, EPI_ISL_3234792, EPI_ISL_3234793, EPI_ISL_3234814, EPI_ISL_3234895, EPI_ISL_3234906, EPI_ISL_3234926                                                    | see above                                                                                                | Wisconsin State Laboratory of Hygiene<br>Communicable Disease Division                          | Abigail C. Shockey; Alicia J. Mooney; Erika M. Hanson; Kelsey R. Florek; Richard Griesser; Sara Wagner; Tonya Danz                                                                                                                                                                                                                                                                                                                                             |
| EPI_ISL_3247009,<br>EPI_ISL_3247011                                                                                                                                      | Wyoming Public Health<br>Laboratory                                                                      | Wyoming Public Health Laboratory                                                                | Ashley Norberg; Brian Dominguez; Cari Sloma; Channing Weber; Chayse Rowley; Elliot Thomasson; Jim Mildenberger; Marley Goetz; Robert Petit; Sam Britz; Taylor Fearing; and Rob Christensen                                                                                                                                                                                                                                                                     |
| EPI_ISL_3236409, EPI_ISL_3236465, EPI_ISL_3236471, EPI_ISL_3236480, EPI_ISL_3369781, EPI_ISL_3369782, EPI_ISL_3370109, EPI_ISL_3370110, EPI_ISL_3370111, EPI_ISL_3370112 | see above                                                                                                | Yale Clinical Virology Lab                                                                      | Grubaugh Lab - Yale School of Public Health<br>Anderson Brito; Annie Watkins; Chaney Kalinich; Chantal Vogels; Isabel Ott; Jessica Rothman; Joseph Fauver; Kendall Billig; Mallery Breban; Marie L. Landry; Mary Petrone; Nathan Grubaugh; Tara Alpert; Tobias Koch                                                                                                                                                                                            |
| EPI_ISL_4520827,<br>EPI_ISL_4520830                                                                                                                                      | Yamina Cumplido Romero                                                                                   | Universidad Nacional de Colombia -<br>Laboratorio Genómico One Health                           | Andres F. Cardona-Rios; Carlos Franco-Muñoz; Carolina Muñoz-Arango; Celeny Ortiz; Daniel O. Maldonado-Perez; Diego A. Álvarez-Díaz; Hector Alejandro Ruiz-Moreno; Idabely Betancur Ortiz; Jorge E. Osorio; Juan P. Hernandez-Ortiz; Karl A Ciuderis; Katherine Laiton-Donato; Laura Silvana Perez; Lina M. Hurtado; Marcela Mercado-Reyes; María Angélica Maya; María Stella López; Rita Almanza Payares; Sandra Ines Caho; Simón Villegas Velásquez           |
| EPI_ISL_3115647,<br>EPI_ISL_3115672                                                                                                                                      | ZOTZ KLIMAS MVZ<br>Düsseldorf-Centrum GbR<br>ÜBAG für Labormedizin,<br>Genetik, Zytologie,<br>Pathologie | Center of Medical Microbiology, Virology,<br>and Hospital Hygiene, University of<br>Duesseldorf | Alexander Dilthey; Andreas Walker; Daniel Strelow; Jessica Nicolai; Jörg Timm; Katrin Hoffmann; Klaus Pfeffer; Lisanna Hülse; Malte Kohns Vasconcelos; Maximilian Damagnez; Nadine Lübke; Patrick Finzer; Rainer Zotz; Tobias Wienemann; Torsten Houwaart                                                                                                                                                                                                      |
| EPI_ISL_2833685<br>EPI_ISL_2600375                                                                                                                                       | Zentrallabor Zürich<br>cerballiance-IDF                                                                  | Institute of Medical Virology<br>Cerba lab                                                      | Alexandra Trkola; Annette Audigé; Cyril Shah; Gabriela Ziltener; Guido Bloemberg; Jon Huder; Jürg Böni; Kevin Steiner; Maria Grünberg; Maryam Zaheri; Michael Huber; Riccarda Capaul; Stefan Schmutz; Verena Kufner<br>Aude Lessenne; Bénédicte Roquebert; Emmanuel Lecorche; Kader Merah; Laura Verdume; Patrice Herisson; Sabine Trombert-Paolantoni; Stéphanie Haïm-Boukobza; Thierry Colin                                                                 |
| EPI_ISL_2657875                                                                                                                                                          | laboratorio de salud publica<br>de cundinamarca                                                          | Instituto Nacional de Salud- Dirección de<br>Investigación en Salud Pública                     | Carlos Franco-Muñoz; Carmen Osorio; Diana Malo; Diego A. Álvarez-Díaz; Diego Andrés Prada; Gerardo Santamaría; Hector Alejandro Ruiz-Moreno; Jhonnatan Reales-González; Jorge Rivera; Juan Camilo Martinez; Julian Naizaque; Katherine Laiton-Donato; Lisseth Pardo; Magdalena Wiesner; Marcela Mercado-Reyes; María T. Herrera-Sepúlveda; Marta Lopez Blanco; Martha Lucia Ospina Martinez; Paola Rojas; Sergio Gomez; Sheryll Corchuelo; Ángela Alarcon Cruz |
| EPI_ISL_6136195                                                                                                                                                          | unknown                                                                                                  | Nobilis                                                                                         | Katharine Jennings; Lauren Brinkac; Lee F. Kolakowski; Minh Tran; Shane Mitchell; Shiela Diepold; William M. Nelson                                                                                                                                                                                                                                                                                                                                            |

We gratefully acknowledge the following Authors from the Originating laboratories responsible for obtaining the specimens, as well as the Submitting laboratories where the genome data were generated and shared via GISAID, on which this research is based.

All Submitters of data may be contacted directly via [www.gisaid.org](http://www.gisaid.org)

Authors are sorted alphabetically.

| Accession ID                                                                                                                                                                                                                                                                                                                                                                                                                                                                                                                                                                                                                                                                                                                                                                                                                                                                                      | Originating Laboratory                                                                                                 | Submitting Laboratory                                                                                                                        | Authors                                                                                                                                                                                                                                                                                                                                                                                                                                                                               |
|---------------------------------------------------------------------------------------------------------------------------------------------------------------------------------------------------------------------------------------------------------------------------------------------------------------------------------------------------------------------------------------------------------------------------------------------------------------------------------------------------------------------------------------------------------------------------------------------------------------------------------------------------------------------------------------------------------------------------------------------------------------------------------------------------------------------------------------------------------------------------------------------------|------------------------------------------------------------------------------------------------------------------------|----------------------------------------------------------------------------------------------------------------------------------------------|---------------------------------------------------------------------------------------------------------------------------------------------------------------------------------------------------------------------------------------------------------------------------------------------------------------------------------------------------------------------------------------------------------------------------------------------------------------------------------------|
| EPI_ISL_6640916, EPI_ISL_6640917, EPI_ISL_6640919, EPI_ISL_6670244, EPI_ISL_6752026, EPI_ISL_6752027, EPI_ISL_6774081, EPI_ISL_6774083, EPI_ISL_6774084, EPI_ISL_6774085, EPI_ISL_6774087, EPI_ISL_6774088, EPI_ISL_6774089, EPI_ISL_6774090, EPI_ISL_6774091, EPI_ISL_6774093                                                                                                                                                                                                                                                                                                                                                                                                                                                                                                                                                                                                                    | Botswana Harvard HIV Reference Laboratory                                                                              | Botswana Harvard HIV Reference Laboratory                                                                                                    | Boitumelo Zuze; Botshelo Radibe; Dorcas Maruapula; Joseph Makhema; Keoratile Ntshambiwa; Kgomotsu Moruisi; Legodile Kooepile; Mosepele Mosepele; Mphaphi B. Mbulawa; Ontlametse T. Bareng; Pamela Smith-Lawrence; Roger Shapiro; Sefetogi Ramaolaga; Shahin Lockman; Sikhullile Moyo; Simani Gaseitsiwe; Thongbotho Mphoyakgosi; Wonderful T. Choga                                                                                                                                   |
| see above                                                                                                                                                                                                                                                                                                                                                                                                                                                                                                                                                                                                                                                                                                                                                                                                                                                                                         | HOME QUARANTINE TASKFORCE<br>Home Quarantine Taskforce                                                                 | Hong Kong Department of Health<br>Hong Kong Department of Health                                                                             | Alan K.L. Tsang; Edman T.K. Lam; Ken H.L. Ng; Peter C.W. Yip; Rickjason C.W. Chan<br>Alan K.L. Tsang; Edman T.K. Lam; Ken H.L. Ng; Peter C.W. Yip; Rickjason C.W. Chan                                                                                                                                                                                                                                                                                                                |
| EPI_ISL_6698790<br>EPI_ISL_6590782<br>EPI_ISL_6794907                                                                                                                                                                                                                                                                                                                                                                                                                                                                                                                                                                                                                                                                                                                                                                                                                                             | KU Leuven, Rega Institute, Clinical and Epidemiological Virology                                                       | KU Leuven, Rega Institute, Clinical and Epidemiological Virology                                                                             | Bert Vanmechelen; Joan Marti-Carerras; Piet Maes; Tony Wawina-Bokalanga                                                                                                                                                                                                                                                                                                                                                                                                               |
| EPI_ISL_6647956, EPI_ISL_6647957, EPI_ISL_6647958, EPI_ISL_6647959, EPI_ISL_6647960, EPI_ISL_6647961, EPI_ISL_6647962, EPI_ISL_6698792, EPI_ISL_6704864, EPI_ISL_6704867, EPI_ISL_6704870, EPI_ISL_6704871, EPI_ISL_6704872, EPI_ISL_6704873, EPI_ISL_6704874, EPI_ISL_6704875                                                                                                                                                                                                                                                                                                                                                                                                                                                                                                                                                                                                                    | LANCET LABORATORY                                                                                                      | National Institute for Communicable Diseases of the National Health Laboratory Service                                                       | Amoako DG; Bhiman JN; Everatt J; Glass A; Ismail A; Mahlangu B; Mnguni A; Mohale T; Ntuli N; Scheepers C; Viana R; Wolter N                                                                                                                                                                                                                                                                                                                                                           |
| see above                                                                                                                                                                                                                                                                                                                                                                                                                                                                                                                                                                                                                                                                                                                                                                                                                                                                                         | National Health Laboratory Service, Kwazulu-Natal, South Africa                                                        | CERI, Centre for Epidemic Response and Innovation, Stellenbosch University and KRISP, KZN Research Innovation and Sequencing Platform, UKZN. | Arisha Maharaj; Giandhari J; Naidoo Y; Nokukhanya Mdlalose; Pillay S; Ramphal U; Ramphal Y; San JE; Tegally H; Tshiabuila D; Wilkinson E; de Oliveira T                                                                                                                                                                                                                                                                                                                               |
| EPI_ISL_6795195, EPI_ISL_6795199, EPI_ISL_6795202, EPI_ISL_6795406                                                                                                                                                                                                                                                                                                                                                                                                                                                                                                                                                                                                                                                                                                                                                                                                                                | National Health Laboratory Services, Virology                                                                          | CERI, Centre for Epidemic Response and Innovation, Stellenbosch University and KRISP, KZN Research Innovation and Sequencing Platform, UKZN. | Arisha Maharaj; Florette Treurnicht; Giandhari J; Kathleen Subramoney; Naidoo Y; Pillay S; Ramphal U; Ramphal Y; San JE; Tegally H; Tshiabuila D; Wilkinson E; de Oliveira T                                                                                                                                                                                                                                                                                                          |
| EPI_ISL_6795188, EPI_ISL_6795189, EPI_ISL_6795190, EPI_ISL_6795191, EPI_ISL_6795193                                                                                                                                                                                                                                                                                                                                                                                                                                                                                                                                                                                                                                                                                                                                                                                                               | National Health Laboratory Services, Virology                                                                          | CERI, Centre for Epidemic Response and Innovation, Stellenbosch University and KRISP, KZN Research Innovation and Sequencing Platform, UKZN. | Arisha Maharaj; Florette Treurnicht; Giandhari J; Kathleen Subramoney; Naidoo Y; Pillay S; Ramphal U; Ramphal Y; San JE; Tegally H; Tshiabuila D; Wilkinson E; de Oliveira T                                                                                                                                                                                                                                                                                                          |
| EPI_ISL_6699728, EPI_ISL_6699729, EPI_ISL_6699730, EPI_ISL_6699731, EPI_ISL_6699732, EPI_ISL_6699733, EPI_ISL_6699734, EPI_ISL_6699735, EPI_ISL_6699736, EPI_ISL_6699737, EPI_ISL_6699738, EPI_ISL_6699739, EPI_ISL_6699740, EPI_ISL_6699741, EPI_ISL_6699742, EPI_ISL_6699743, EPI_ISL_6699744, EPI_ISL_6699745, EPI_ISL_6699746, EPI_ISL_6699747, EPI_ISL_6699748, EPI_ISL_6699749, EPI_ISL_6699750, EPI_ISL_6699751, EPI_ISL_6699752, EPI_ISL_6699753, EPI_ISL_6699754, EPI_ISL_6699755, EPI_ISL_6699756, EPI_ISL_6699757, EPI_ISL_6699758, EPI_ISL_6699759, EPI_ISL_6699760, EPI_ISL_6699761, EPI_ISL_6699762, EPI_ISL_6699763, EPI_ISL_6699764, EPI_ISL_6699765, EPI_ISL_6699766, EPI_ISL_6699767, EPI_ISL_6699768, EPI_ISL_6699769, EPI_ISL_6699770, EPI_ISL_6699771, EPI_ISL_6782055, EPI_ISL_6782056, EPI_ISL_6782071, EPI_ISL_6782079, EPI_ISL_6782080, EPI_ISL_6782084, EPI_ISL_6782092 | National Health Laboratory Services, Virology, Charlotte Maxeke Johannesburg hospital, Parktown, Johannesburg, Gauteng | CERI, Centre for Epidemic Response and Innovation, Stellenbosch University and KRISP, KZN Research Innovation and Sequencing Platform, UKZN. | Amoaka D; Arisha Maharaj; Avani Bharuthram; Bester P; Bhiman J; Engelbrecht S; Everatt J; Florette Treurnicht; Goedhals D; Hardie D; Hsiao M; Iranzadeh A; Kathleen Subramoney; Lessells R; Makatini Z; Maponga T; Mdlalose N; Mlisana K; Moir M; NGS-SA (Scheepers C; Naidoo Y; Nkhensani Mtleni; Nyaga M) Giandhari J; Oluwakemi M; Pillay S; Preiser W; Ramphal U; Ramphal Y; San JE; Tegally H; Tshiabuila D; Venter M; Wilkinson E; Williamson C; de Oliveira T; von Gottberg A  |
| see above                                                                                                                                                                                                                                                                                                                                                                                                                                                                                                                                                                                                                                                                                                                                                                                                                                                                                         | Palapye Primary Hospital Laboratory                                                                                    | Botswana Harvard HIV Reference Laboratory                                                                                                    | Boitumelo Zuze; Botshelo Radibe; Dorcas Maruapula; Joseph Makhema; Keoratile Ntshambiwa; Kgomotsu Moruisi; Legodile Kooepile; Mosepele Mosepele; Mphaphi B. Mbulawa; Ontlametse T. Bareng; Pamela Smith-Lawrence; Roger Shapiro; Sefetogi Ramaolaga; Shahin Lockman; Sikhullile Moyo; Simani Gaseitsiwe; Thongbotho Mphoyakgosi; Wonderful T. Choga                                                                                                                                   |
| EPI_ISL_6774082, EPI_ISL_6774086, EPI_ISL_6774092                                                                                                                                                                                                                                                                                                                                                                                                                                                                                                                                                                                                                                                                                                                                                                                                                                                 | Shamir Medical Center (Asaf Harofe)                                                                                    | Shamir Medical Center (Asaf Harofe)                                                                                                          | Abu Hamad Ramzia; Adina Bar Chaim; Alona Frenkel; Anna Vishnevsky; Chen Weiner; Nir Rainy; Patricia Benveniste-Lekovitz; Reut Sorek Abramovich; Yevgeni Yegorov                                                                                                                                                                                                                                                                                                                       |
| EPI_ISL_6795212                                                                                                                                                                                                                                                                                                                                                                                                                                                                                                                                                                                                                                                                                                                                                                                                                                                                                   | ZARV/NHLS, Department Medical Virology, University of Pretoria                                                         | CERI, Centre for Epidemic Response and Innovation, Stellenbosch University and KRISP, KZN Research Innovation and Sequencing Platform, UKZN. | Adriano Mendes; Amoaka D; Amy Strydom; Arisha Maharaj; Bester P; Bhiman J; Engelbrecht S; Everatt J; Goedhals D; Hardie D; Hsiao M; Iranzadeh A; Lessells R; Makatini Z; Maponga T; Mdlalose N; Miceala Davids; Mlisana K; Moir M; NGS-SA (Scheepers C; Naidoo Y; Nyaga M) Giandhari J; Oluwakemi M; Pillay S; Preiser W; Ramphal U; Ramphal Y; San JE; Sim Mayaphi and Marietjie Venter; Tegally H; Tshiabuila D; Venter M; Wilkinson E; Williamson C; de Oliveira T; von Gottberg A |
| EPI_ISL_6795833, EPI_ISL_6795835, EPI_ISL_6795836, EPI_ISL_6795837, EPI_ISL_6795838, EPI_ISL_6795839, EPI_ISL_6795840, EPI_ISL_6795841, EPI_ISL_6795842, EPI_ISL_6795844, EPI_ISL_6795845, EPI_ISL_6795846, EPI_ISL_6795847, EPI_ISL_6795848, EPI_ISL_6795849, EPI_ISL_6795850                                                                                                                                                                                                                                                                                                                                                                                                                                                                                                                                                                                                                    | ZARV/NHLS, Department Medical Virology, University of Pretoria                                                         | CERI, Centre for Epidemic Response and Innovation, Stellenbosch University and KRISP, KZN Research Innovation and Sequencing Platform, UKZN. | Adriano Mendes; Amoaka D; Amy Strydom; Arisha Maharaj; Bester P; Bhiman J; Engelbrecht S; Everatt J; Goedhals D; Hardie D; Hsiao M; Iranzadeh A; Lessells R; Makatini Z; Maponga T; Mdlalose N; Miceala Davids; Mlisana K; Moir M; NGS-SA (Scheepers C; Naidoo Y; Nyaga M) Giandhari J; Oluwakemi M; Pillay S; Preiser W; Ramphal U; Ramphal Y; San JE; Sim Mayaphi and Marietjie Venter; Tegally H; Tshiabuila D; Venter M; Wilkinson E; Williamson C; de Oliveira T; von Gottberg A |
| see above                                                                                                                                                                                                                                                                                                                                                                                                                                                                                                                                                                                                                                                                                                                                                                                                                                                                                         | ZARV/NHLS, Department Medical Virology, University of Pretoria                                                         | CERI, Centre for Epidemic Response and Innovation, Stellenbosch University and KRISP, KZN Research Innovation and Sequencing Platform, UKZN. | Adriano Mendes; Amoaka D; Amy Strydom; Arisha Maharaj; Bester P; Bhiman J; Engelbrecht S; Everatt J; Goedhals D; Hardie D; Hsiao M; Iranzadeh A; Lessells R; Makatini Z; Maponga T; Mdlalose N; Miceala Davids; Mlisana K; Moir M; NGS-SA (Scheepers C; Naidoo Y; Nyaga M) Giandhari J; Oluwakemi M; Pillay S; Preiser W; Ramphal U; Ramphal Y; San JE; Sim Mayaphi and Marietjie Venter; Tegally H; Tshiabuila D; Venter M; Wilkinson E; Williamson C; de Oliveira T; von Gottberg A |



| Virologie - Institut Fédératif de Biologie                                                                                                                                                                                                                                                                                                                                                                                                                                                                                                                                                                                                                                                                                                                                                                                                                                                                                                                                                                                                                                                                                                                                                                                                                                                                                                                                                                                                                                                                                                                                                                                                                                                                                                                                                                                                                                                                                                                                                                                                                                                                                                                                                                                                                                                                                                                                                                                                                                                                                                                                                                                                                                                                                                                                                                                                                                                                                                                                                                                                                                                                                                       |                                                                                                                    | Fédératif de Biologie                                                                    |                                                                                                                                                           |                                                                                                                                                                                                                                                                                                                                                                                                                                                                                                                                                                   |  |
|--------------------------------------------------------------------------------------------------------------------------------------------------------------------------------------------------------------------------------------------------------------------------------------------------------------------------------------------------------------------------------------------------------------------------------------------------------------------------------------------------------------------------------------------------------------------------------------------------------------------------------------------------------------------------------------------------------------------------------------------------------------------------------------------------------------------------------------------------------------------------------------------------------------------------------------------------------------------------------------------------------------------------------------------------------------------------------------------------------------------------------------------------------------------------------------------------------------------------------------------------------------------------------------------------------------------------------------------------------------------------------------------------------------------------------------------------------------------------------------------------------------------------------------------------------------------------------------------------------------------------------------------------------------------------------------------------------------------------------------------------------------------------------------------------------------------------------------------------------------------------------------------------------------------------------------------------------------------------------------------------------------------------------------------------------------------------------------------------------------------------------------------------------------------------------------------------------------------------------------------------------------------------------------------------------------------------------------------------------------------------------------------------------------------------------------------------------------------------------------------------------------------------------------------------------------------------------------------------------------------------------------------------------------------------------------------------------------------------------------------------------------------------------------------------------------------------------------------------------------------------------------------------------------------------------------------------------------------------------------------------------------------------------------------------------------------------------------------------------------------------------------------------|--------------------------------------------------------------------------------------------------------------------|------------------------------------------------------------------------------------------|-----------------------------------------------------------------------------------------------------------------------------------------------------------|-------------------------------------------------------------------------------------------------------------------------------------------------------------------------------------------------------------------------------------------------------------------------------------------------------------------------------------------------------------------------------------------------------------------------------------------------------------------------------------------------------------------------------------------------------------------|--|
| EPI_ISL_6511944                                                                                                                                                                                                                                                                                                                                                                                                                                                                                                                                                                                                                                                                                                                                                                                                                                                                                                                                                                                                                                                                                                                                                                                                                                                                                                                                                                                                                                                                                                                                                                                                                                                                                                                                                                                                                                                                                                                                                                                                                                                                                                                                                                                                                                                                                                                                                                                                                                                                                                                                                                                                                                                                                                                                                                                                                                                                                                                                                                                                                                                                                                                                  | CHU Saint-Etienne                                                                                                  | CHU Saint-Etienne                                                                        |                                                                                                                                                           | Bruno Pozzetto; Issam Bechri; Sylvie Gonzalo; Sylvie Pillet; Thomas Bourlet                                                                                                                                                                                                                                                                                                                                                                                                                                                                                       |  |
| EPI_ISL_6077119, EPI_ISL_6077121, EPI_ISL_6077125, EPI_ISL_6077126, EPI_ISL_6077145, EPI_ISL_6077151, EPI_ISL_6077152, EPI_ISL_6077160, EPI_ISL_6077161, EPI_ISL_6077163                                                                                                                                                                                                                                                                                                                                                                                                                                                                                                                                                                                                                                                                                                                                                                                                                                                                                                                                                                                                                                                                                                                                                                                                                                                                                                                                                                                                                                                                                                                                                                                                                                                                                                                                                                                                                                                                                                                                                                                                                                                                                                                                                                                                                                                                                                                                                                                                                                                                                                                                                                                                                                                                                                                                                                                                                                                                                                                                                                         |                                                                                                                    |                                                                                          |                                                                                                                                                           |                                                                                                                                                                                                                                                                                                                                                                                                                                                                                                                                                                   |  |
| see above                                                                                                                                                                                                                                                                                                                                                                                                                                                                                                                                                                                                                                                                                                                                                                                                                                                                                                                                                                                                                                                                                                                                                                                                                                                                                                                                                                                                                                                                                                                                                                                                                                                                                                                                                                                                                                                                                                                                                                                                                                                                                                                                                                                                                                                                                                                                                                                                                                                                                                                                                                                                                                                                                                                                                                                                                                                                                                                                                                                                                                                                                                                                        | CNR Virus des Infections Respiratoires - France SUD                                                                | CNR Virus des Infections Respiratoires - France SUD                                      |                                                                                                                                                           | Antonin Bal; Bruno Lina; Bruno Simon; Gregory Destras; Gwendolyne Burfin; Hadrien Regue; Laurence Josset; Martine Valette; Quentin Semanas                                                                                                                                                                                                                                                                                                                                                                                                                        |  |
| EPI_ISL_6482200                                                                                                                                                                                                                                                                                                                                                                                                                                                                                                                                                                                                                                                                                                                                                                                                                                                                                                                                                                                                                                                                                                                                                                                                                                                                                                                                                                                                                                                                                                                                                                                                                                                                                                                                                                                                                                                                                                                                                                                                                                                                                                                                                                                                                                                                                                                                                                                                                                                                                                                                                                                                                                                                                                                                                                                                                                                                                                                                                                                                                                                                                                                                  | Cantacuzino National Military-Medical Institute, Viral Respiratory Infections Laboratory                           | Cantacuzino National Military-Medical Institute, Viral Respiratory Infections Laboratory |                                                                                                                                                           | Carmen Cherciu; Luiza Ustea; Mihaela Lazar; Mihaela Oprea; Nicoleta Paraschiv; Sorin Dinu                                                                                                                                                                                                                                                                                                                                                                                                                                                                         |  |
| EPI_ISL_6267895                                                                                                                                                                                                                                                                                                                                                                                                                                                                                                                                                                                                                                                                                                                                                                                                                                                                                                                                                                                                                                                                                                                                                                                                                                                                                                                                                                                                                                                                                                                                                                                                                                                                                                                                                                                                                                                                                                                                                                                                                                                                                                                                                                                                                                                                                                                                                                                                                                                                                                                                                                                                                                                                                                                                                                                                                                                                                                                                                                                                                                                                                                                                  | Center for Research and Innovation, Faculty of Medical Technology, Mahidol University                              | Center for Research and Innovation, Faculty of Medical Technology, Mahidol University    |                                                                                                                                                           | Chartchalern Isarakura-Na-Ayudhya; Hatairat Lerdsmarn; Jarunee Prasertsoyon; Kantima Sangsriwut; Kuntida Kitdee; Nattakan Thinpun; Pilaipan Puthavathana                                                                                                                                                                                                                                                                                                                                                                                                          |  |
| EPI_ISL_5879574, EPI_ISL_5879577, EPI_ISL_5879581, EPI_ISL_5879585                                                                                                                                                                                                                                                                                                                                                                                                                                                                                                                                                                                                                                                                                                                                                                                                                                                                                                                                                                                                                                                                                                                                                                                                                                                                                                                                                                                                                                                                                                                                                                                                                                                                                                                                                                                                                                                                                                                                                                                                                                                                                                                                                                                                                                                                                                                                                                                                                                                                                                                                                                                                                                                                                                                                                                                                                                                                                                                                                                                                                                                                               | Center of Excellence in Clinical Virology                                                                          | Research Unit of Systems Microbiology                                                    |                                                                                                                                                           | Amornmas Kongkliang; Jira Chansaenroj; Jiratchaya Puenpa; Kamolthip Atsawararunut; Nungruthai Suntronwong; Nutsada Saengdo; Oraphan Prasoetpong; Pakkapon Panwijitkul; Pattaraporn Nimsamer; Paththaya Rattanakomol; Ritthideach Yorsaeng; Rijupat Wasitthankasem; Sunchai Payungporn; Suwanna Paetto; Vichan Pawun; Vayuram Sawasong; Yong Poooravorn                                                                                                                                                                                                            |  |
| EPI_ISL_6227591, EPI_ISL_6227592, EPI_ISL_6227593, EPI_ISL_6270690                                                                                                                                                                                                                                                                                                                                                                                                                                                                                                                                                                                                                                                                                                                                                                                                                                                                                                                                                                                                                                                                                                                                                                                                                                                                                                                                                                                                                                                                                                                                                                                                                                                                                                                                                                                                                                                                                                                                                                                                                                                                                                                                                                                                                                                                                                                                                                                                                                                                                                                                                                                                                                                                                                                                                                                                                                                                                                                                                                                                                                                                               | Centre Hospitalier Universitaire de Rouen Laboratoire de Virologie                                                 | Centre Hospitalier Universitaire de Rouen Laboratoire de Virologie                       |                                                                                                                                                           | Alice Moisan; Fabienne De Oliveira; Marie Leoz                                                                                                                                                                                                                                                                                                                                                                                                                                                                                                                    |  |
| EPI_ISL_5801839                                                                                                                                                                                                                                                                                                                                                                                                                                                                                                                                                                                                                                                                                                                                                                                                                                                                                                                                                                                                                                                                                                                                                                                                                                                                                                                                                                                                                                                                                                                                                                                                                                                                                                                                                                                                                                                                                                                                                                                                                                                                                                                                                                                                                                                                                                                                                                                                                                                                                                                                                                                                                                                                                                                                                                                                                                                                                                                                                                                                                                                                                                                                  | Centro De Referencia Do Idosso Dr Humberto Mendes De Carvalho                                                      | Instituto Butantan                                                                       |                                                                                                                                                           | Antonio Jorge Martins; Claudia Renata dos Santos Barros; David Schlesinger; Debora Botequiu Moretti; Dimas Tadeu Covas; Elaine Cristina Marqueze; Elaine Vieira Santos; Evandra Strazza Rodrigues; Heidge Fukumasu; Jayme Augusto de Souza-Neto; José Salvatore Leister Patané; Luiz Alcantara; Luiz Lehmann Coutinho; Maria Carolina Elias; Mauricio Lacerda Nogueira; Rafael dos Santos Bezerra; Raul Machado Neto; Rejane Maria Tommasini Grotto; Ricardo Haddad; Sandra Coccuzzo Sampaio Vessoni; Simone Kashima; Svetoslav Nanev Slavov; Vincent Louis Viala |  |
| EPI_ISL_5802073                                                                                                                                                                                                                                                                                                                                                                                                                                                                                                                                                                                                                                                                                                                                                                                                                                                                                                                                                                                                                                                                                                                                                                                                                                                                                                                                                                                                                                                                                                                                                                                                                                                                                                                                                                                                                                                                                                                                                                                                                                                                                                                                                                                                                                                                                                                                                                                                                                                                                                                                                                                                                                                                                                                                                                                                                                                                                                                                                                                                                                                                                                                                  | Centro De Saude De Chavantes                                                                                       | Instituto Butantan                                                                       |                                                                                                                                                           | Antonio Jorge Martins; Claudia Renata dos Santos Barros; David Schlesinger; Debora Botequiu Moretti; Dimas Tadeu Covas; Elaine Cristina Marqueze; Elaine Vieira Santos; Evandra Strazza Rodrigues; Heidge Fukumasu; Jayme Augusto de Souza-Neto; José Salvatore Leister Patané; Luiz Alcantara; Luiz Lehmann Coutinho; Maria Carolina Elias; Mauricio Lacerda Nogueira; Rafael dos Santos Bezerra; Raul Machado Neto; Rejane Maria Tommasini Grotto; Ricardo Haddad; Sandra Coccuzzo Sampaio Vessoni; Simone Kashima; Svetoslav Nanev Slavov; Vincent Louis Viala |  |
| EPI_ISL_5801572                                                                                                                                                                                                                                                                                                                                                                                                                                                                                                                                                                                                                                                                                                                                                                                                                                                                                                                                                                                                                                                                                                                                                                                                                                                                                                                                                                                                                                                                                                                                                                                                                                                                                                                                                                                                                                                                                                                                                                                                                                                                                                                                                                                                                                                                                                                                                                                                                                                                                                                                                                                                                                                                                                                                                                                                                                                                                                                                                                                                                                                                                                                                  | Centro De Saude De Lupercio                                                                                        | Instituto Butantan                                                                       |                                                                                                                                                           | Antonio Jorge Martins; Claudia Renata dos Santos Barros; David Schlesinger; Debora Botequiu Moretti; Dimas Tadeu Covas; Elaine Cristina Marqueze; Elaine Vieira Santos; Evandra Strazza Rodrigues; Heidge Fukumasu; Jayme Augusto de Souza-Neto; José Salvatore Leister Patané; Luiz Alcantara; Luiz Lehmann Coutinho; Maria Carolina Elias; Mauricio Lacerda Nogueira; Rafael dos Santos Bezerra; Raul Machado Neto; Rejane Maria Tommasini Grotto; Ricardo Haddad; Sandra Coccuzzo Sampaio Vessoni; Simone Kashima; Svetoslav Nanev Slavov; Vincent Louis Viala |  |
| EPI_ISL_5799751, EPI_ISL_5800774                                                                                                                                                                                                                                                                                                                                                                                                                                                                                                                                                                                                                                                                                                                                                                                                                                                                                                                                                                                                                                                                                                                                                                                                                                                                                                                                                                                                                                                                                                                                                                                                                                                                                                                                                                                                                                                                                                                                                                                                                                                                                                                                                                                                                                                                                                                                                                                                                                                                                                                                                                                                                                                                                                                                                                                                                                                                                                                                                                                                                                                                                                                 | Centro De Saude Dr Marip Dias De Aguiar Caprio                                                                     | Instituto Butantan                                                                       |                                                                                                                                                           | Antonio Jorge Martins; Claudia Renata dos Santos Barros; David Schlesinger; Debora Botequiu Moretti; Dimas Tadeu Covas; Elaine Cristina Marqueze; Elaine Vieira Santos; Evandra Strazza Rodrigues; Heidge Fukumasu; Jayme Augusto de Souza-Neto; José Salvatore Leister Patané; Luiz Alcantara; Luiz Lehmann Coutinho; Maria Carolina Elias; Mauricio Lacerda Nogueira; Rafael dos Santos Bezerra; Raul Machado Neto; Rejane Maria Tommasini Grotto; Ricardo Haddad; Sandra Coccuzzo Sampaio Vessoni; Simone Kashima; Svetoslav Nanev Slavov; Vincent Louis Viala |  |
| EPI_ISL_5800722                                                                                                                                                                                                                                                                                                                                                                                                                                                                                                                                                                                                                                                                                                                                                                                                                                                                                                                                                                                                                                                                                                                                                                                                                                                                                                                                                                                                                                                                                                                                                                                                                                                                                                                                                                                                                                                                                                                                                                                                                                                                                                                                                                                                                                                                                                                                                                                                                                                                                                                                                                                                                                                                                                                                                                                                                                                                                                                                                                                                                                                                                                                                  | Centro De Saude Dr Nelson Da Cunha Bastos                                                                          | Instituto Butantan                                                                       |                                                                                                                                                           | Antonio Jorge Martins; Claudia Renata dos Santos Barros; David Schlesinger; Debora Botequiu Moretti; Dimas Tadeu Covas; Elaine Cristina Marqueze; Elaine Vieira Santos; Evandra Strazza Rodrigues; Heidge Fukumasu; Jayme Augusto de Souza-Neto; José Salvatore Leister Patané; Luiz Alcantara; Luiz Lehmann Coutinho; Maria Carolina Elias; Mauricio Lacerda Nogueira; Rafael dos Santos Bezerra; Raul Machado Neto; Rejane Maria Tommasini Grotto; Ricardo Haddad; Sandra Coccuzzo Sampaio Vessoni; Simone Kashima; Svetoslav Nanev Slavov; Vincent Louis Viala |  |
| EPI_ISL_5802225                                                                                                                                                                                                                                                                                                                                                                                                                                                                                                                                                                                                                                                                                                                                                                                                                                                                                                                                                                                                                                                                                                                                                                                                                                                                                                                                                                                                                                                                                                                                                                                                                                                                                                                                                                                                                                                                                                                                                                                                                                                                                                                                                                                                                                                                                                                                                                                                                                                                                                                                                                                                                                                                                                                                                                                                                                                                                                                                                                                                                                                                                                                                  | Centro De Saude Dr Renato De Carvalho Ribeiro Angutaba                                                             | Instituto Butantan                                                                       |                                                                                                                                                           | Antonio Jorge Martins; Claudia Renata dos Santos Barros; David Schlesinger; Debora Botequiu Moretti; Dimas Tadeu Covas; Elaine Cristina Marqueze; Elaine Vieira Santos; Evandra Strazza Rodrigues; Heidge Fukumasu; Jayme Augusto de Souza-Neto; José Salvatore Leister Patané; Luiz Alcantara; Luiz Lehmann Coutinho; Maria Carolina Elias; Mauricio Lacerda Nogueira; Rafael dos Santos Bezerra; Raul Machado Neto; Rejane Maria Tommasini Grotto; Ricardo Haddad; Sandra Coccuzzo Sampaio Vessoni; Simone Kashima; Svetoslav Nanev Slavov; Vincent Louis Viala |  |
| EPI_ISL_5800407                                                                                                                                                                                                                                                                                                                                                                                                                                                                                                                                                                                                                                                                                                                                                                                                                                                                                                                                                                                                                                                                                                                                                                                                                                                                                                                                                                                                                                                                                                                                                                                                                                                                                                                                                                                                                                                                                                                                                                                                                                                                                                                                                                                                                                                                                                                                                                                                                                                                                                                                                                                                                                                                                                                                                                                                                                                                                                                                                                                                                                                                                                                                  | Centro De Saude Ili Borgebora                                                                                      | Instituto Butantan                                                                       |                                                                                                                                                           | Antonio Jorge Martins; Claudia Renata dos Santos Barros; David Schlesinger; Debora Botequiu Moretti; Dimas Tadeu Covas; Elaine Cristina Marqueze; Elaine Vieira Santos; Evandra Strazza Rodrigues; Heidge Fukumasu; Jayme Augusto de Souza-Neto; José Salvatore Leister Patané; Luiz Alcantara; Luiz Lehmann Coutinho; Maria Carolina Elias; Mauricio Lacerda Nogueira; Rafael dos Santos Bezerra; Raul Machado Neto; Rejane Maria Tommasini Grotto; Ricardo Haddad; Sandra Coccuzzo Sampaio Vessoni; Simone Kashima; Svetoslav Nanev Slavov; Vincent Louis Viala |  |
| EPI_ISL_5801889                                                                                                                                                                                                                                                                                                                                                                                                                                                                                                                                                                                                                                                                                                                                                                                                                                                                                                                                                                                                                                                                                                                                                                                                                                                                                                                                                                                                                                                                                                                                                                                                                                                                                                                                                                                                                                                                                                                                                                                                                                                                                                                                                                                                                                                                                                                                                                                                                                                                                                                                                                                                                                                                                                                                                                                                                                                                                                                                                                                                                                                                                                                                  | Centro De Saude Ili Sales Oliveira                                                                                 | Instituto Butantan                                                                       |                                                                                                                                                           | Antonio Jorge Martins; Claudia Renata dos Santos Barros; David Schlesinger; Debora Botequiu Moretti; Dimas Tadeu Covas; Elaine Cristina Marqueze; Elaine Vieira Santos; Evandra Strazza Rodrigues; Heidge Fukumasu; Jayme Augusto de Souza-Neto; José Salvatore Leister Patané; Luiz Alcantara; Luiz Lehmann Coutinho; Maria Carolina Elias; Mauricio Lacerda Nogueira; Rafael dos Santos Bezerra; Raul Machado Neto; Rejane Maria Tommasini Grotto; Ricardo Haddad; Sandra Coccuzzo Sampaio Vessoni; Simone Kashima; Svetoslav Nanev Slavov; Vincent Louis Viala |  |
| EPI_ISL_5947081, EPI_ISL_5947083, EPI_ISL_5947084, EPI_ISL_5947085, EPI_ISL_5947086, EPI_ISL_5947087, EPI_ISL_5947088, EPI_ISL_5947091, EPI_ISL_5947093, EPI_ISL_5947094, EPI_ISL_5947102, EPI_ISL_5947105, EPI_ISL_5947110, EPI_ISL_5947113, EPI_ISL_5947114, EPI_ISL_5947115, EPI_ISL_5947116, EPI_ISL_5947117, EPI_ISL_5947118, EPI_ISL_5947119, EPI_ISL_5947120, EPI_ISL_5947121, EPI_ISL_5947122, EPI_ISL_5947123, EPI_ISL_5947124, EPI_ISL_5947125, EPI_ISL_5947126, EPI_ISL_5947127, EPI_ISL_5947129, EPI_ISL_5947132, EPI_ISL_5947136, EPI_ISL_5947139, EPI_ISL_5947147, EPI_ISL_5947153, EPI_ISL_5947156, EPI_ISL_5947157, EPI_ISL_5947158, EPI_ISL_5947159, EPI_ISL_5947162, EPI_ISL_5947167, EPI_ISL_5947168, EPI_ISL_5947173, EPI_ISL_5947177, EPI_ISL_5947180, EPI_ISL_5947181, EPI_ISL_5947184, EPI_ISL_5947187, EPI_ISL_5947193, EPI_ISL_5947194, EPI_ISL_5947198, EPI_ISL_5947208, EPI_ISL_5947209, EPI_ISL_5947235, EPI_ISL_5947239, EPI_ISL_5947240, EPI_ISL_5947241, EPI_ISL_5947242, EPI_ISL_5947246, EPI_ISL_5947247, EPI_ISL_5947249, EPI_ISL_5947250, EPI_ISL_5947251, EPI_ISL_5947252, EPI_ISL_5947253, EPI_ISL_5947254, EPI_ISL_5947255, EPI_ISL_5947256, EPI_ISL_5947257, EPI_ISL_5947258, EPI_ISL_5947259, EPI_ISL_5947260, EPI_ISL_5947261, EPI_ISL_5947264, EPI_ISL_5947265, EPI_ISL_5947266, EPI_ISL_5947267, EPI_ISL_5947270, EPI_ISL_6371513, EPI_ISL_6371514, EPI_ISL_6371515, EPI_ISL_6371516, EPI_ISL_6371517, EPI_ISL_6371518, EPI_ISL_6371519, EPI_ISL_6371520, EPI_ISL_6371521, EPI_ISL_6371522, EPI_ISL_6371523, EPI_ISL_6371524, EPI_ISL_6371525, EPI_ISL_6371527                                                                                                                                                                                                                                                                                                                                                                                                                                                                                                                                                                                                                                                                                                                                                                                                                                                                                                                                                                                                                                                                                                                                                                                                                                                                                                                                                                                                                                                                                                                                        |                                                                                                                    |                                                                                          | Barbara Mühlemann; Christian Drosten; Julia Schneider; Julia Tesch; Jörn Beheim-Schwarzbach; Talitha Veith; Terry Jones; Tobias Bleicker; Victor M Corman |                                                                                                                                                                                                                                                                                                                                                                                                                                                                                                                                                                   |  |
| see above                                                                                                                                                                                                                                                                                                                                                                                                                                                                                                                                                                                                                                                                                                                                                                                                                                                                                                                                                                                                                                                                                                                                                                                                                                                                                                                                                                                                                                                                                                                                                                                                                                                                                                                                                                                                                                                                                                                                                                                                                                                                                                                                                                                                                                                                                                                                                                                                                                                                                                                                                                                                                                                                                                                                                                                                                                                                                                                                                                                                                                                                                                                                        | Charité Universitätsmedizin Berlin, Institut für Virologie/Labor Berlin                                            | Charité Universitätsmedizin Berlin, Institut für Virologie                               |                                                                                                                                                           |                                                                                                                                                                                                                                                                                                                                                                                                                                                                                                                                                                   |  |
| EPI_ISL_6023750, EPI_ISL_6023811, EPI_ISL_6023925, EPI_ISL_6023952, EPI_ISL_6024022, EPI_ISL_6024041, EPI_ISL_6024648                                                                                                                                                                                                                                                                                                                                                                                                                                                                                                                                                                                                                                                                                                                                                                                                                                                                                                                                                                                                                                                                                                                                                                                                                                                                                                                                                                                                                                                                                                                                                                                                                                                                                                                                                                                                                                                                                                                                                                                                                                                                                                                                                                                                                                                                                                                                                                                                                                                                                                                                                                                                                                                                                                                                                                                                                                                                                                                                                                                                                            |                                                                                                                    |                                                                                          |                                                                                                                                                           |                                                                                                                                                                                                                                                                                                                                                                                                                                                                                                                                                                   |  |
| see above                                                                                                                                                                                                                                                                                                                                                                                                                                                                                                                                                                                                                                                                                                                                                                                                                                                                                                                                                                                                                                                                                                                                                                                                                                                                                                                                                                                                                                                                                                                                                                                                                                                                                                                                                                                                                                                                                                                                                                                                                                                                                                                                                                                                                                                                                                                                                                                                                                                                                                                                                                                                                                                                                                                                                                                                                                                                                                                                                                                                                                                                                                                                        | Clinical Virology Laboratory, ILBS                                                                                 | ILBS                                                                                     |                                                                                                                                                           | Amit Pandey; Chhagan Bihari Sharma; Diptanu Paul; Ekta Gupta; Reshu Agarwal; Shiv Kumar Sarin; Varun Suroliya                                                                                                                                                                                                                                                                                                                                                                                                                                                     |  |
| EPI_ISL_6210984, EPI_ISL_6210985, EPI_ISL_6210994, EPI_ISL_6210995, EPI_ISL_6210997, EPI_ISL_6211000, EPI_ISL_6211002, EPI_ISL_6211005, EPI_ISL_6211008, EPI_ISL_6211009, EPI_ISL_6211011, EPI_ISL_6211012, EPI_ISL_6211016, EPI_ISL_6211018, EPI_ISL_6211019, EPI_ISL_6211022, EPI_ISL_6211025, EPI_ISL_6211026, EPI_ISL_6211027, EPI_ISL_6211032, EPI_ISL_6211036, EPI_ISL_6211078, EPI_ISL_6211079, EPI_ISL_6211082, EPI_ISL_6211083, EPI_ISL_6211084, EPI_ISL_6211099, EPI_ISL_6211100, EPI_ISL_6211111, EPI_ISL_6211115, EPI_ISL_6211117, EPI_ISL_6211118, EPI_ISL_6211123, EPI_ISL_6211124, EPI_ISL_6211133, EPI_ISL_6211137, EPI_ISL_6211138, EPI_ISL_6211140, EPI_ISL_6211143, EPI_ISL_6211144, EPI_ISL_6211147, EPI_ISL_6211148, EPI_ISL_6211150, EPI_ISL_6211151, EPI_ISL_6211153, EPI_ISL_6211155, EPI_ISL_6211157, EPI_ISL_6211157, EPI_ISL_6211161, EPI_ISL_6211164, EPI_ISL_6211165, EPI_ISL_6211166, EPI_ISL_6211168, EPI_ISL_6211169, EPI_ISL_6211170, EPI_ISL_6211172, EPI_ISL_6211180, EPI_ISL_6211185, EPI_ISL_6211193, EPI_ISL_6211194, EPI_ISL_6211198, EPI_ISL_6211205, EPI_ISL_6211207, EPI_ISL_6211210, EPI_ISL_6211211, EPI_ISL_6211218, EPI_ISL_6211221, EPI_ISL_6211223, EPI_ISL_6211226, EPI_ISL_6211230, EPI_ISL_6211233, EPI_ISL_6211239, EPI_ISL_6211247, EPI_ISL_6211250, EPI_ISL_6211252, EPI_ISL_6211253, EPI_ISL_6211254, EPI_ISL_6211255, EPI_ISL_6211257, EPI_ISL_6211260, EPI_ISL_6211266, EPI_ISL_6211267, EPI_ISL_6211268, EPI_ISL_6211269, EPI_ISL_6211272, EPI_ISL_6211280, EPI_ISL_6211284, EPI_ISL_6211285, EPI_ISL_6211288, EPI_ISL_6211289, EPI_ISL_6211290, EPI_ISL_6211291, EPI_ISL_6211292, EPI_ISL_6211293, EPI_ISL_6211294, EPI_ISL_6211295, EPI_ISL_6211296, EPI_ISL_6211299, EPI_ISL_6211305, EPI_ISL_6211306, EPI_ISL_6211307, EPI_ISL_6211308, EPI_ISL_6211312, EPI_ISL_6211313, EPI_ISL_6211316, EPI_ISL_6211318, EPI_ISL_6211319, EPI_ISL_6211320, EPI_ISL_6211324, EPI_ISL_6211325, EPI_ISL_6211326, EPI_ISL_6211326, EPI_ISL_6211327, EPI_ISL_6211328, EPI_ISL_6211330, EPI_ISL_6211334, EPI_ISL_6211336, EPI_ISL_6211343, EPI_ISL_6211345, EPI_ISL_6211346, EPI_ISL_6211354, EPI_ISL_6211356, EPI_ISL_6211357, EPI_ISL_6211358, EPI_ISL_6211360, EPI_ISL_6211363, EPI_ISL_6211369, EPI_ISL_6211370, EPI_ISL_6211375, EPI_ISL_6211382, EPI_ISL_6211387, EPI_ISL_6211390, EPI_ISL_6211400, EPI_ISL_6211403, EPI_ISL_6211406, EPI_ISL_6211410, EPI_ISL_6211411, EPI_ISL_6211461, EPI_ISL_6211462, EPI_ISL_6211463, EPI_ISL_6211469, EPI_ISL_6211470, EPI_ISL_6211474, EPI_ISL_6211475, EPI_ISL_6211476, EPI_ISL_6211479, EPI_ISL_6211482, EPI_ISL_6211483, EPI_ISL_6211484, EPI_ISL_6211485, EPI_ISL_6211487, EPI_ISL_6211497, EPI_ISL_6211498, EPI_ISL_6211500, EPI_ISL_6211502, EPI_ISL_6211503, EPI_ISL_6211504, EPI_ISL_6211507, EPI_ISL_6211508, EPI_ISL_6211509, EPI_ISL_6211510, EPI_ISL_6211515, EPI_ISL_6211516, EPI_ISL_6211517, EPI_ISL_6211518, EPI_ISL_6211519, EPI_ISL_6211521, EPI_ISL_6211523, EPI_ISL_6211526, EPI_ISL_6211528, EPI_ISL_6211529, EPI_ISL_6211530, EPI_ISL_6211536, EPI_ISL_6211538, EPI_ISL_6211539, EPI_ISL_6211540, EPI_ISL_6211545, EPI_ISL_6211551 |                                                                                                                    |                                                                                          |                                                                                                                                                           |                                                                                                                                                                                                                                                                                                                                                                                                                                                                                                                                                                   |  |
| see above                                                                                                                                                                                                                                                                                                                                                                                                                                                                                                                                                                                                                                                                                                                                                                                                                                                                                                                                                                                                                                                                                                                                                                                                                                                                                                                                                                                                                                                                                                                                                                                                                                                                                                                                                                                                                                                                                                                                                                                                                                                                                                                                                                                                                                                                                                                                                                                                                                                                                                                                                                                                                                                                                                                                                                                                                                                                                                                                                                                                                                                                                                                                        | Colorado Department of Public Health and Environment                                                               | Colorado Department of Public Health and Environment                                     |                                                                                                                                                           | Alexandria Rossehim; Diana Ir; Emily A. Travanty; Laura Bankers; Mandy Waters; Michael Martin; Molly C. Hetherington-Rauth; Sarah Elizabeth Totten; Shannon R. Matzinger                                                                                                                                                                                                                                                                                                                                                                                          |  |
| EPI_ISL_5934888, EPI_ISL_5934892, EPI_ISL_5934897, EPI_ISL_5934899, EPI_ISL_5934900, EPI_ISL_5934901, EPI_ISL_5934902, EPI_ISL_5934903, EPI_ISL_5934904, EPI_ISL_5934905                                                                                                                                                                                                                                                                                                                                                                                                                                                                                                                                                                                                                                                                                                                                                                                                                                                                                                                                                                                                                                                                                                                                                                                                                                                                                                                                                                                                                                                                                                                                                                                                                                                                                                                                                                                                                                                                                                                                                                                                                                                                                                                                                                                                                                                                                                                                                                                                                                                                                                                                                                                                                                                                                                                                                                                                                                                                                                                                                                         |                                                                                                                    |                                                                                          |                                                                                                                                                           |                                                                                                                                                                                                                                                                                                                                                                                                                                                                                                                                                                   |  |
| see above                                                                                                                                                                                                                                                                                                                                                                                                                                                                                                                                                                                                                                                                                                                                                                                                                                                                                                                                                                                                                                                                                                                                                                                                                                                                                                                                                                                                                                                                                                                                                                                                                                                                                                                                                                                                                                                                                                                                                                                                                                                                                                                                                                                                                                                                                                                                                                                                                                                                                                                                                                                                                                                                                                                                                                                                                                                                                                                                                                                                                                                                                                                                        | Cotabato Regional and Medical Center                                                                               | Philippine Genome Center Mindanao                                                        |                                                                                                                                                           | April Mae Numeron; Giovanna Fae R. Oguis; Homer Sajonia II; Ineke Knot; Isha Marie Sibong; Jiverzon B. Guiral; Joan T. Acaso; Kahil Corazo; Lyre Anni E. Murao; Michael G. Bacus; Paul Lorenzo A. Gaité; Ritchie Mae T. Gamot; Sherjan P. Kalim                                                                                                                                                                                                                                                                                                                   |  |
| EPI_ISL_5800757                                                                                                                                                                                                                                                                                                                                                                                                                                                                                                                                                                                                                                                                                                                                                                                                                                                                                                                                                                                                                                                                                                                                                                                                                                                                                                                                                                                                                                                                                                                                                                                                                                                                                                                                                                                                                                                                                                                                                                                                                                                                                                                                                                                                                                                                                                                                                                                                                                                                                                                                                                                                                                                                                                                                                                                                                                                                                                                                                                                                                                                                                                                                  | Cs De Catigua                                                                                                      | Instituto Butantan                                                                       |                                                                                                                                                           | Antonio Jorge Martins; Claudia Renata dos Santos Barros; David Schlesinger; Debora Botequiu Moretti; Dimas Tadeu Covas; Elaine Cristina Marqueze; Elaine Vieira Santos; Evandra Strazza Rodrigues; Heidge Fukumasu; Jayme Augusto de Souza-Neto; José Salvatore Leister Patané; Luiz Alcantara; Luiz Lehmann Coutinho; Maria Carolina Elias; Mauricio Lacerda Nogueira; Rafael dos Santos Bezerra; Raul Machado Neto; Rejane Maria Tommasini Grotto; Ricardo Haddad; Sandra Coccuzzo Sampaio Vessoni; Simone Kashima; Svetoslav Nanev Slavov; Vincent Louis Viala |  |
| EPI_ISL_5800481                                                                                                                                                                                                                                                                                                                                                                                                                                                                                                                                                                                                                                                                                                                                                                                                                                                                                                                                                                                                                                                                                                                                                                                                                                                                                                                                                                                                                                                                                                                                                                                                                                                                                                                                                                                                                                                                                                                                                                                                                                                                                                                                                                                                                                                                                                                                                                                                                                                                                                                                                                                                                                                                                                                                                                                                                                                                                                                                                                                                                                                                                                                                  | Cs De Mirassolandia                                                                                                | Instituto Butantan                                                                       |                                                                                                                                                           | Antonio Jorge Martins; Claudia Renata dos Santos Barros; David Schlesinger; Debora Botequiu Moretti; Dimas Tadeu Covas; Elaine Cristina Marqueze; Elaine Vieira Santos; Evandra Strazza Rodrigues; Heidge Fukumasu; Jayme Augusto de Souza-Neto; José Salvatore Leister Patané; Luiz Alcantara; Luiz Lehmann Coutinho; Maria Carolina Elias; Mauricio Lacerda Nogueira; Rafael dos Santos Bezerra; Raul Machado Neto; Rejane Maria Tommasini Grotto; Ricardo Haddad; Sandra Coccuzzo Sampaio Vessoni; Simone Kashima; Svetoslav Nanev Slavov; Vincent Louis Viala |  |
| EPI_ISL_5801287                                                                                                                                                                                                                                                                                                                                                                                                                                                                                                                                                                                                                                                                                                                                                                                                                                                                                                                                                                                                                                                                                                                                                                                                                                                                                                                                                                                                                                                                                                                                                                                                                                                                                                                                                                                                                                                                                                                                                                                                                                                                                                                                                                                                                                                                                                                                                                                                                                                                                                                                                                                                                                                                                                                                                                                                                                                                                                                                                                                                                                                                                                                                  | Cs Ii Dr Miguel Vitaliano Oriandia                                                                                 | Instituto Butantan                                                                       |                                                                                                                                                           | Antonio Jorge Martins; Claudia Renata dos Santos Barros; David Schlesinger; Debora Botequiu Moretti; Dimas Tadeu Covas; Elaine Cristina Marqueze; Elaine Vieira Santos; Evandra Strazza Rodrigues; Heidge Fukumasu; Jayme Augusto de Souza-Neto; José Salvatore Leister Patané; Luiz Alcantara; Luiz Lehmann Coutinho; Maria Carolina Elias; Mauricio Lacerda Nogueira; Rafael dos Santos Bezerra; Raul Machado Neto; Rejane Maria Tommasini Grotto; Ricardo Haddad; Sandra Coccuzzo Sampaio Vessoni; Simone Kashima; Svetoslav Nanev Slavov; Vincent Louis Viala |  |
| EPI_ISL_5801834                                                                                                                                                                                                                                                                                                                                                                                                                                                                                                                                                                                                                                                                                                                                                                                                                                                                                                                                                                                                                                                                                                                                                                                                                                                                                                                                                                                                                                                                                                                                                                                                                                                                                                                                                                                                                                                                                                                                                                                                                                                                                                                                                                                                                                                                                                                                                                                                                                                                                                                                                                                                                                                                                                                                                                                                                                                                                                                                                                                                                                                                                                                                  | Cs Ii Egídio Brunhara Morro Agudo                                                                                  | Instituto Butantan                                                                       |                                                                                                                                                           | Antonio Jorge Martins; Claudia Renata dos Santos Barros; David Schlesinger; Debora Botequiu Moretti; Dimas Tadeu Covas; Elaine Cristina Marqueze; Elaine Vieira Santos; Evandra Strazza Rodrigues; Heidge Fukumasu; Jayme Augusto de Souza-Neto; José Salvatore Leister Patané; Luiz Alcantara; Luiz Lehmann Coutinho; Maria Carolina Elias; Mauricio Lacerda Nogueira; Rafael dos Santos Bezerra; Raul Machado Neto; Rejane Maria Tommasini Grotto; Ricardo Haddad; Sandra Coccuzzo Sampaio Vessoni; Simone Kashima; Svetoslav Nanev Slavov; Vincent Louis Viala |  |
| EPI_ISL_5800095                                                                                                                                                                                                                                                                                                                                                                                                                                                                                                                                                                                                                                                                                                                                                                                                                                                                                                                                                                                                                                                                                                                                                                                                                                                                                                                                                                                                                                                                                                                                                                                                                                                                                                                                                                                                                                                                                                                                                                                                                                                                                                                                                                                                                                                                                                                                                                                                                                                                                                                                                                                                                                                                                                                                                                                                                                                                                                                                                                                                                                                                                                                                  | Cs Iolanda Fleury De Campos Guedes Nupuranga                                                                       | Instituto Butantan                                                                       |                                                                                                                                                           | Antonio Jorge Martins; Claudia Renata dos Santos Barros; David Schlesinger; Debora Botequiu Moretti; Dimas Tadeu Covas; Elaine Cristina Marqueze; Elaine Vieira Santos; Evandra Strazza Rodrigues; Heidge Fukumasu; Jayme Augusto de Souza-Neto; José Salvatore Leister Patané; Luiz Alcantara; Luiz Lehmann Coutinho; Maria Carolina Elias; Mauricio Lacerda Nogueira; Rafael dos Santos Bezerra; Raul Machado Neto; Rejane Maria Tommasini Grotto; Ricardo Haddad; Sandra Coccuzzo Sampaio Vessoni; Simone Kashima; Svetoslav Nanev Slavov; Vincent Louis Viala |  |
| EPI_ISL_6251101                                                                                                                                                                                                                                                                                                                                                                                                                                                                                                                                                                                                                                                                                                                                                                                                                                                                                                                                                                                                                                                                                                                                                                                                                                                                                                                                                                                                                                                                                                                                                                                                                                                                                                                                                                                                                                                                                                                                                                                                                                                                                                                                                                                                                                                                                                                                                                                                                                                                                                                                                                                                                                                                                                                                                                                                                                                                                                                                                                                                                                                                                                                                  | DC Public Health Lab/ Dept. of Forensic Sciences                                                                   | DC Public Health Lab/ Dept. of Forensic Sciences                                         |                                                                                                                                                           | Brittany Hamilton; Connie Mazia; Elizabeth Zelaya; Janis Doss; Jocelyn Hauser; Monica Mann; Nathan Bruns; Sarah Scott; Sandra Nguyen; Wadih Bchara                                                                                                                                                                                                                                                                                                                                                                                                                |  |
| EPI_ISL_6540247                                                                                                                                                                                                                                                                                                                                                                                                                                                                                                                                                                                                                                                                                                                                                                                                                                                                                                                                                                                                                                                                                                                                                                                                                                                                                                                                                                                                                                                                                                                                                                                                                                                                                                                                                                                                                                                                                                                                                                                                                                                                                                                                                                                                                                                                                                                                                                                                                                                                                                                                                                                                                                                                                                                                                                                                                                                                                                                                                                                                                                                                                                                                  | Davao de Oro Provincial Hospital-Montevista                                                                        | Philippine Genome Center Mindanao                                                        |                                                                                                                                                           | Anna Jessa Carnicer; April Mae Numeron; Chad Barrete; Charmen Mae Cava; Cheelwin Rey Maglasang; Giovanna Fae R. Oguis; Hanani Ramos; Homer Sajonia II; Ineke Knot; Jessa Marie Guliban; Joan T. Acaso; Kahil Corazo; Lyre Anni E. Murao; Megan Balderas; Michael G. Bacus; Nerilyn B. Kunnang; Paul Lorenzo A. Gaité; Quoleen Xandra Besinio; Rannie John Dianco; Renalyn Señoran; Ritchie Mae T. Gamot                                                                                                                                                           |  |
| EPI_ISL_5800259                                                                                                                                                                                                                                                                                                                                                                                                                                                                                                                                                                                                                                                                                                                                                                                                                                                                                                                                                                                                                                                                                                                                                                                                                                                                                                                                                                                                                                                                                                                                                                                                                                                                                                                                                                                                                                                                                                                                                                                                                                                                                                                                                                                                                                                                                                                                                                                                                                                                                                                                                                                                                                                                                                                                                                                                                                                                                                                                                                                                                                                                                                                                  | Departamento De Saude Coletiva                                                                                     | Instituto Butantan                                                                       |                                                                                                                                                           | Antonio Jorge Martins; Claudia Renata dos Santos Barros; David Schlesinger; Debora Botequiu Moretti; Dimas Tadeu Covas; Elaine Cristina Marqueze; Elaine Vieira Santos; Evandra Strazza Rodrigues; Heidge Fukumasu; Jayme Augusto de Souza-Neto; José Salvatore Leister Patané; Luiz Alcantara; Luiz Lehmann Coutinho; Maria Carolina Elias; Mauricio Lacerda Nogueira; Rafael dos Santos Bezerra; Raul Machado Neto; Rejane Maria Tommasini Grotto; Ricardo Haddad; Sandra Coccuzzo Sampaio Vessoni; Simone Kashima; Svetoslav Nanev Slavov; Vincent Louis Viala |  |
| EPI_ISL_6014760, EPI_ISL_6014964, EPI_ISL_6241022, EPI_ISL_6245888, EPI_ISL_6245894, EPI_ISL_6245903                                                                                                                                                                                                                                                                                                                                                                                                                                                                                                                                                                                                                                                                                                                                                                                                                                                                                                                                                                                                                                                                                                                                                                                                                                                                                                                                                                                                                                                                                                                                                                                                                                                                                                                                                                                                                                                                                                                                                                                                                                                                                                                                                                                                                                                                                                                                                                                                                                                                                                                                                                                                                                                                                                                                                                                                                                                                                                                                                                                                                                             | Department of Bacteria, Parasites and Fungi, Statens Serum Institut, Copenhagen, Denmark                           | Statens Serum Institut Bioinformatics and Microbial Genomics                             |                                                                                                                                                           | Danish Covid-19 Genome Consortium                                                                                                                                                                                                                                                                                                                                                                                                                                                                                                                                 |  |
| EPI_ISL_5880834, EPI_ISL_5880839, EPI_ISL_5880840, EPI_ISL_5880845, EPI_ISL_5880846, EPI_ISL_5880847, EPI_ISL_5933757                                                                                                                                                                                                                                                                                                                                                                                                                                                                                                                                                                                                                                                                                                                                                                                                                                                                                                                                                                                                                                                                                                                                                                                                                                                                                                                                                                                                                                                                                                                                                                                                                                                                                                                                                                                                                                                                                                                                                                                                                                                                                                                                                                                                                                                                                                                                                                                                                                                                                                                                                                                                                                                                                                                                                                                                                                                                                                                                                                                                                            | Department of Health Region 10                                                                                     | Philippine Genome Center Mindanao                                                        |                                                                                                                                                           | April Mae Numeron; Diadem Ricarte; Giovanna Fae R. Oguis; Hannah Kristy Falle; Homer Sajonia II; Ian Christian A. Gonzales; Ineke Knot; Joan T. Acaso; Kahil Corazo; Lyre Anni E. Murao; Michael G. Bacus; Paul Lorenzo A. Gaité; Ritchie Mae T. Gamot                                                                                                                                                                                                                                                                                                            |  |
| EPI_ISL_5806108                                                                                                                                                                                                                                                                                                                                                                                                                                                                                                                                                                                                                                                                                                                                                                                                                                                                                                                                                                                                                                                                                                                                                                                                                                                                                                                                                                                                                                                                                                                                                                                                                                                                                                                                                                                                                                                                                                                                                                                                                                                                                                                                                                                                                                                                                                                                                                                                                                                                                                                                                                                                                                                                                                                                                                                                                                                                                                                                                                                                                                                                                                                                  | Department of Laboratory Medicine, Shinshu University Hospital                                                     | Department of Laboratory Medicine, Shinshu University Hospital                           |                                                                                                                                                           | Akari Miyazaki; Saori Konno; Shohei Shigetou; Tatsuya Negishi                                                                                                                                                                                                                                                                                                                                                                                                                                                                                                     |  |
| EPI_ISL_6340532                                                                                                                                                                                                                                                                                                                                                                                                                                                                                                                                                                                                                                                                                                                                                                                                                                                                                                                                                                                                                                                                                                                                                                                                                                                                                                                                                                                                                                                                                                                                                                                                                                                                                                                                                                                                                                                                                                                                                                                                                                                                                                                                                                                                                                                                                                                                                                                                                                                                                                                                                                                                                                                                                                                                                                                                                                                                                                                                                                                                                                                                                                                                  | Department of Microbiology and Virology, School of Medicine, Golestan University of Medical Sciences, Gorgan, Iran | Genetics Research Center, University of Social Welfare and Rehabilitation Sciences       |                                                                                                                                                           | Abdolvahab Moradi; Alijan Tabarraei; Alireza Tahamtan; Babak Shahbaz; Bahman Aghjeli; Hossein Najmabadi.; Kimia Kahrizi; Maryam Beheshtian; Marzieh Mohseni; Vahdat Poortahmasebi; Zohreh Fattahi                                                                                                                                                                                                                                                                                                                                                                 |  |
| EPI_ISL_6121787                                                                                                                                                                                                                                                                                                                                                                                                                                                                                                                                                                                                                                                                                                                                                                                                                                                                                                                                                                                                                                                                                                                                                                                                                                                                                                                                                                                                                                                                                                                                                                                                                                                                                                                                                                                                                                                                                                                                                                                                                                                                                                                                                                                                                                                                                                                                                                                                                                                                                                                                                                                                                                                                                                                                                                                                                                                                                                                                                                                                                                                                                                                                  | Department of Molecular Diagnostic.                                                                                | Genetics Research Center, University of Social                                           |                                                                                                                                                           | Alireza Soleimani; Hossein Najmabadi.; Kimia Kahrizi; Maryam Beheshtian; Marzieh Mohseni; Zakiye Mokhames; Zohreh Fattahi                                                                                                                                                                                                                                                                                                                                                                                                                                         |  |

|                                                                                                                                                                                                                                                                                                                                                                                                                                                                                                                                                                                                                                                                                                                                                                                                                                                                                                                                                                                                                                                                                                                                                                                                                                                                                                                                                                                                                                                                                                                                                                                                                                                                                                                                                                                                                                                                                                                                                                                                                                                                                                                                                                                                                                                                                                                                                                                                                                                                                                                                                                                                                                                                                                                                                                                                                                                                                                                                                                                                                                                                                                                                                                                                                                                                                                                                                                                                                                                                                                                                                                                                                                                                                                                                                                                                                                                                                                                                                                                                                                                                                                                                                                                                                                                                                                                                                                                                                                                                                                                                                                                                                                                                                                                                                                                                                                                                                                                                                                                                                                                                                                                                                                                                                                                                                                                                                                                                                                                                                                                                                                                                                                                                                                                                                                                                                                                                                                                                                                                                                                                                                                                                                                                                                                                                                                                                                                                                                                                                                                                                                                                                                                                                                                                                                                                                                                                                                                                                                                                                                                                                                                                                                                                                                                                                                                                                                                                                                                                                                                                                                                                                                                                                                                                                                                                                                                                                                                                                                                                                                                                                                                                                                                                                                                                                                                                                                                                                                                                                                                                                                                                                                                                                                                                                                                                                                                                                                                                                                                                                                                                                                                                                                                                                                                                                                                                                                                                                                                                                                                                                                                                                                                                                                                                                                                                                                                                                                                                                                                                                                                                                                                                                                                                                                                                                                                                                                                                                                                                                                |                                                                                                          |                                                                                                 |                                                                                                                                                                                                                                                                                                                                                                                                                                                                                                                                                                   |                                                                                                                                                                                                                                                                                                                                                                               |
|--------------------------------------------------------------------------------------------------------------------------------------------------------------------------------------------------------------------------------------------------------------------------------------------------------------------------------------------------------------------------------------------------------------------------------------------------------------------------------------------------------------------------------------------------------------------------------------------------------------------------------------------------------------------------------------------------------------------------------------------------------------------------------------------------------------------------------------------------------------------------------------------------------------------------------------------------------------------------------------------------------------------------------------------------------------------------------------------------------------------------------------------------------------------------------------------------------------------------------------------------------------------------------------------------------------------------------------------------------------------------------------------------------------------------------------------------------------------------------------------------------------------------------------------------------------------------------------------------------------------------------------------------------------------------------------------------------------------------------------------------------------------------------------------------------------------------------------------------------------------------------------------------------------------------------------------------------------------------------------------------------------------------------------------------------------------------------------------------------------------------------------------------------------------------------------------------------------------------------------------------------------------------------------------------------------------------------------------------------------------------------------------------------------------------------------------------------------------------------------------------------------------------------------------------------------------------------------------------------------------------------------------------------------------------------------------------------------------------------------------------------------------------------------------------------------------------------------------------------------------------------------------------------------------------------------------------------------------------------------------------------------------------------------------------------------------------------------------------------------------------------------------------------------------------------------------------------------------------------------------------------------------------------------------------------------------------------------------------------------------------------------------------------------------------------------------------------------------------------------------------------------------------------------------------------------------------------------------------------------------------------------------------------------------------------------------------------------------------------------------------------------------------------------------------------------------------------------------------------------------------------------------------------------------------------------------------------------------------------------------------------------------------------------------------------------------------------------------------------------------------------------------------------------------------------------------------------------------------------------------------------------------------------------------------------------------------------------------------------------------------------------------------------------------------------------------------------------------------------------------------------------------------------------------------------------------------------------------------------------------------------------------------------------------------------------------------------------------------------------------------------------------------------------------------------------------------------------------------------------------------------------------------------------------------------------------------------------------------------------------------------------------------------------------------------------------------------------------------------------------------------------------------------------------------------------------------------------------------------------------------------------------------------------------------------------------------------------------------------------------------------------------------------------------------------------------------------------------------------------------------------------------------------------------------------------------------------------------------------------------------------------------------------------------------------------------------------------------------------------------------------------------------------------------------------------------------------------------------------------------------------------------------------------------------------------------------------------------------------------------------------------------------------------------------------------------------------------------------------------------------------------------------------------------------------------------------------------------------------------------------------------------------------------------------------------------------------------------------------------------------------------------------------------------------------------------------------------------------------------------------------------------------------------------------------------------------------------------------------------------------------------------------------------------------------------------------------------------------------------------------------------------------------------------------------------------------------------------------------------------------------------------------------------------------------------------------------------------------------------------------------------------------------------------------------------------------------------------------------------------------------------------------------------------------------------------------------------------------------------------------------------------------------------------------------------------------------------------------------------------------------------------------------------------------------------------------------------------------------------------------------------------------------------------------------------------------------------------------------------------------------------------------------------------------------------------------------------------------------------------------------------------------------------------------------------------------------------------------------------------------------------------------------------------------------------------------------------------------------------------------------------------------------------------------------------------------------------------------------------------------------------------------------------------------------------------------------------------------------------------------------------------------------------------------------------------------------------------------------------------------------------------------------------------------------------------------------------------------------------------------------------------------------------------------------------------------------------------------------------------------------------------------------------------------------------------------------------------------------------------------------------------------------------------------------------------------------------------------------------------------------------------------------------------------------------------------------------------------------------------------------------------------------------------------------------------------------------------------------------------------------------------------------------------------------------------------------------------------------------------------------------------------------------------------------------------------------------------------------------------------------------------------------------------------------------------------------------------------------------------------------------------------------------------------------------------------------------------------------------------------------------------------------------------------------------------------------------------------------------------------------------------------------------------------------------------------------------------------------------------------------------------------------------------------------------------------------------------------------------------------------------------------------------------------------------------------------------------------------------------------------------------------------------------------------------------------------------------------------------------------------------------------------------------------------------------------------------------------------------------------------------------------------------------------------------------------------------------------------|----------------------------------------------------------------------------------------------------------|-------------------------------------------------------------------------------------------------|-------------------------------------------------------------------------------------------------------------------------------------------------------------------------------------------------------------------------------------------------------------------------------------------------------------------------------------------------------------------------------------------------------------------------------------------------------------------------------------------------------------------------------------------------------------------|-------------------------------------------------------------------------------------------------------------------------------------------------------------------------------------------------------------------------------------------------------------------------------------------------------------------------------------------------------------------------------|
|                                                                                                                                                                                                                                                                                                                                                                                                                                                                                                                                                                                                                                                                                                                                                                                                                                                                                                                                                                                                                                                                                                                                                                                                                                                                                                                                                                                                                                                                                                                                                                                                                                                                                                                                                                                                                                                                                                                                                                                                                                                                                                                                                                                                                                                                                                                                                                                                                                                                                                                                                                                                                                                                                                                                                                                                                                                                                                                                                                                                                                                                                                                                                                                                                                                                                                                                                                                                                                                                                                                                                                                                                                                                                                                                                                                                                                                                                                                                                                                                                                                                                                                                                                                                                                                                                                                                                                                                                                                                                                                                                                                                                                                                                                                                                                                                                                                                                                                                                                                                                                                                                                                                                                                                                                                                                                                                                                                                                                                                                                                                                                                                                                                                                                                                                                                                                                                                                                                                                                                                                                                                                                                                                                                                                                                                                                                                                                                                                                                                                                                                                                                                                                                                                                                                                                                                                                                                                                                                                                                                                                                                                                                                                                                                                                                                                                                                                                                                                                                                                                                                                                                                                                                                                                                                                                                                                                                                                                                                                                                                                                                                                                                                                                                                                                                                                                                                                                                                                                                                                                                                                                                                                                                                                                                                                                                                                                                                                                                                                                                                                                                                                                                                                                                                                                                                                                                                                                                                                                                                                                                                                                                                                                                                                                                                                                                                                                                                                                                                                                                                                                                                                                                                                                                                                                                                                                                                                                                                                                                                                | Emam Ali Educational and Therapeutic Center, Alborz University of Medical Sciences, Karaj, Iran          | Welfare and Rehabilitation Sciences                                                             |                                                                                                                                                                                                                                                                                                                                                                                                                                                                                                                                                                   |                                                                                                                                                                                                                                                                                                                                                                               |
| EPI_ISL_6258644                                                                                                                                                                                                                                                                                                                                                                                                                                                                                                                                                                                                                                                                                                                                                                                                                                                                                                                                                                                                                                                                                                                                                                                                                                                                                                                                                                                                                                                                                                                                                                                                                                                                                                                                                                                                                                                                                                                                                                                                                                                                                                                                                                                                                                                                                                                                                                                                                                                                                                                                                                                                                                                                                                                                                                                                                                                                                                                                                                                                                                                                                                                                                                                                                                                                                                                                                                                                                                                                                                                                                                                                                                                                                                                                                                                                                                                                                                                                                                                                                                                                                                                                                                                                                                                                                                                                                                                                                                                                                                                                                                                                                                                                                                                                                                                                                                                                                                                                                                                                                                                                                                                                                                                                                                                                                                                                                                                                                                                                                                                                                                                                                                                                                                                                                                                                                                                                                                                                                                                                                                                                                                                                                                                                                                                                                                                                                                                                                                                                                                                                                                                                                                                                                                                                                                                                                                                                                                                                                                                                                                                                                                                                                                                                                                                                                                                                                                                                                                                                                                                                                                                                                                                                                                                                                                                                                                                                                                                                                                                                                                                                                                                                                                                                                                                                                                                                                                                                                                                                                                                                                                                                                                                                                                                                                                                                                                                                                                                                                                                                                                                                                                                                                                                                                                                                                                                                                                                                                                                                                                                                                                                                                                                                                                                                                                                                                                                                                                                                                                                                                                                                                                                                                                                                                                                                                                                                                                                                                                                                | Department of Veterinary Science and Department of Virology I, National Institute of Infectious Diseases | Center for Influenza and Respiratory Virus Research, National Institute of Infectious Diseases  | Akihiro Doi; Hideki Hasegawa; Ikuyo Takayama; Kango Tatemoto; Kaya Miyazaki; Keita Ishijima; Ken Maeda; Mutsuyo Takayama-Ito; Seichiro Fujisaki; Shinji Watanabe; Shuetsu Fukushima; Takahiro Maeki; Tsukasa Yamamoto; Yudai Kuroda                                                                                                                                                                                                                                                                                                                               |                                                                                                                                                                                                                                                                                                                                                                               |
| EPI_ISL_6390860, EPI_ISL_6390861, EPI_ISL_6436370, EPI_ISL_6436374                                                                                                                                                                                                                                                                                                                                                                                                                                                                                                                                                                                                                                                                                                                                                                                                                                                                                                                                                                                                                                                                                                                                                                                                                                                                                                                                                                                                                                                                                                                                                                                                                                                                                                                                                                                                                                                                                                                                                                                                                                                                                                                                                                                                                                                                                                                                                                                                                                                                                                                                                                                                                                                                                                                                                                                                                                                                                                                                                                                                                                                                                                                                                                                                                                                                                                                                                                                                                                                                                                                                                                                                                                                                                                                                                                                                                                                                                                                                                                                                                                                                                                                                                                                                                                                                                                                                                                                                                                                                                                                                                                                                                                                                                                                                                                                                                                                                                                                                                                                                                                                                                                                                                                                                                                                                                                                                                                                                                                                                                                                                                                                                                                                                                                                                                                                                                                                                                                                                                                                                                                                                                                                                                                                                                                                                                                                                                                                                                                                                                                                                                                                                                                                                                                                                                                                                                                                                                                                                                                                                                                                                                                                                                                                                                                                                                                                                                                                                                                                                                                                                                                                                                                                                                                                                                                                                                                                                                                                                                                                                                                                                                                                                                                                                                                                                                                                                                                                                                                                                                                                                                                                                                                                                                                                                                                                                                                                                                                                                                                                                                                                                                                                                                                                                                                                                                                                                                                                                                                                                                                                                                                                                                                                                                                                                                                                                                                                                                                                                                                                                                                                                                                                                                                                                                                                                                                                                                                                                             | Directia de Sanatate Publica Iasi                                                                        | "Stefan cel Mare" University Metagenomics Lab                                                   |                                                                                                                                                                                                                                                                                                                                                                                                                                                                                                                                                                   | Gheorghita Puscaselu Roxana; Lobiuc Andrei                                                                                                                                                                                                                                                                                                                                    |
| EPI_ISL_6564665, EPI_ISL_6564667, EPI_ISL_6564769, EPI_ISL_6564804, EPI_ISL_6564838, EPI_ISL_6564852, EPI_ISL_6564909, EPI_ISL_6564915, EPI_ISL_6564966, EPI_ISL_6564967, EPI_ISL_6564968, EPI_ISL_6564969, EPI_ISL_6564970, EPI_ISL_6564980, EPI_ISL_6564981, EPI_ISL_6564982                                                                                                                                                                                                                                                                                                                                                                                                                                                                                                                                                                                                                                                                                                                                                                                                                                                                                                                                                                                                                                                                                                                                                                                                                                                                                                                                                                                                                                                                                                                                                                                                                                                                                                                                                                                                                                                                                                                                                                                                                                                                                                                                                                                                                                                                                                                                                                                                                                                                                                                                                                                                                                                                                                                                                                                                                                                                                                                                                                                                                                                                                                                                                                                                                                                                                                                                                                                                                                                                                                                                                                                                                                                                                                                                                                                                                                                                                                                                                                                                                                                                                                                                                                                                                                                                                                                                                                                                                                                                                                                                                                                                                                                                                                                                                                                                                                                                                                                                                                                                                                                                                                                                                                                                                                                                                                                                                                                                                                                                                                                                                                                                                                                                                                                                                                                                                                                                                                                                                                                                                                                                                                                                                                                                                                                                                                                                                                                                                                                                                                                                                                                                                                                                                                                                                                                                                                                                                                                                                                                                                                                                                                                                                                                                                                                                                                                                                                                                                                                                                                                                                                                                                                                                                                                                                                                                                                                                                                                                                                                                                                                                                                                                                                                                                                                                                                                                                                                                                                                                                                                                                                                                                                                                                                                                                                                                                                                                                                                                                                                                                                                                                                                                                                                                                                                                                                                                                                                                                                                                                                                                                                                                                                                                                                                                                                                                                                                                                                                                                                                                                                                                                                                                                                                                 | see above                                                                                                | Directia de Sanatate Publica Neamt                                                              | "Stefan cel Mare" University Metagenomics Lab                                                                                                                                                                                                                                                                                                                                                                                                                                                                                                                     | Gheorghita Puscaselu Roxana; Lobiuc Andrei                                                                                                                                                                                                                                                                                                                                    |
| EPI_ISL_6564819                                                                                                                                                                                                                                                                                                                                                                                                                                                                                                                                                                                                                                                                                                                                                                                                                                                                                                                                                                                                                                                                                                                                                                                                                                                                                                                                                                                                                                                                                                                                                                                                                                                                                                                                                                                                                                                                                                                                                                                                                                                                                                                                                                                                                                                                                                                                                                                                                                                                                                                                                                                                                                                                                                                                                                                                                                                                                                                                                                                                                                                                                                                                                                                                                                                                                                                                                                                                                                                                                                                                                                                                                                                                                                                                                                                                                                                                                                                                                                                                                                                                                                                                                                                                                                                                                                                                                                                                                                                                                                                                                                                                                                                                                                                                                                                                                                                                                                                                                                                                                                                                                                                                                                                                                                                                                                                                                                                                                                                                                                                                                                                                                                                                                                                                                                                                                                                                                                                                                                                                                                                                                                                                                                                                                                                                                                                                                                                                                                                                                                                                                                                                                                                                                                                                                                                                                                                                                                                                                                                                                                                                                                                                                                                                                                                                                                                                                                                                                                                                                                                                                                                                                                                                                                                                                                                                                                                                                                                                                                                                                                                                                                                                                                                                                                                                                                                                                                                                                                                                                                                                                                                                                                                                                                                                                                                                                                                                                                                                                                                                                                                                                                                                                                                                                                                                                                                                                                                                                                                                                                                                                                                                                                                                                                                                                                                                                                                                                                                                                                                                                                                                                                                                                                                                                                                                                                                                                                                                                                                                | Directia de Sanatate Publica Suceava                                                                     | "Stefan cel Mare" University Metagenomics Lab                                                   |                                                                                                                                                                                                                                                                                                                                                                                                                                                                                                                                                                   | Gheorghita Puscaselu Roxana; Lobiuc Andrei                                                                                                                                                                                                                                                                                                                                    |
| EPI_ISL_5865382, EPI_ISL_5865389, EPI_ISL_5865398                                                                                                                                                                                                                                                                                                                                                                                                                                                                                                                                                                                                                                                                                                                                                                                                                                                                                                                                                                                                                                                                                                                                                                                                                                                                                                                                                                                                                                                                                                                                                                                                                                                                                                                                                                                                                                                                                                                                                                                                                                                                                                                                                                                                                                                                                                                                                                                                                                                                                                                                                                                                                                                                                                                                                                                                                                                                                                                                                                                                                                                                                                                                                                                                                                                                                                                                                                                                                                                                                                                                                                                                                                                                                                                                                                                                                                                                                                                                                                                                                                                                                                                                                                                                                                                                                                                                                                                                                                                                                                                                                                                                                                                                                                                                                                                                                                                                                                                                                                                                                                                                                                                                                                                                                                                                                                                                                                                                                                                                                                                                                                                                                                                                                                                                                                                                                                                                                                                                                                                                                                                                                                                                                                                                                                                                                                                                                                                                                                                                                                                                                                                                                                                                                                                                                                                                                                                                                                                                                                                                                                                                                                                                                                                                                                                                                                                                                                                                                                                                                                                                                                                                                                                                                                                                                                                                                                                                                                                                                                                                                                                                                                                                                                                                                                                                                                                                                                                                                                                                                                                                                                                                                                                                                                                                                                                                                                                                                                                                                                                                                                                                                                                                                                                                                                                                                                                                                                                                                                                                                                                                                                                                                                                                                                                                                                                                                                                                                                                                                                                                                                                                                                                                                                                                                                                                                                                                                                                                                              | Dr. Risch Ostschweiz AG                                                                                  | Microbiology                                                                                    |                                                                                                                                                                                                                                                                                                                                                                                                                                                                                                                                                                   | Dominique Fabien Hilti; Faina Wehrli; Lorenz Risch; Martin Risch; Nadia Wohlwend; Sinem Kas; Thomas Bodmer                                                                                                                                                                                                                                                                    |
| EPI_ISL_6230272, EPI_ISL_6230274, EPI_ISL_6230275, EPI_ISL_6230281, EPI_ISL_6230287, EPI_ISL_6230295, EPI_ISL_6230300, EPI_ISL_6230305, EPI_ISL_6230311, EPI_ISL_6230317, EPI_ISL_6230325, EPI_ISL_6230331, EPI_ISL_6230721, EPI_ISL_6230729, EPI_ISL_6230735, EPI_ISL_6230742, EPI_ISL_6230750, EPI_ISL_6230756, EPI_ISL_6230766, EPI_ISL_6230769                                                                                                                                                                                                                                                                                                                                                                                                                                                                                                                                                                                                                                                                                                                                                                                                                                                                                                                                                                                                                                                                                                                                                                                                                                                                                                                                                                                                                                                                                                                                                                                                                                                                                                                                                                                                                                                                                                                                                                                                                                                                                                                                                                                                                                                                                                                                                                                                                                                                                                                                                                                                                                                                                                                                                                                                                                                                                                                                                                                                                                                                                                                                                                                                                                                                                                                                                                                                                                                                                                                                                                                                                                                                                                                                                                                                                                                                                                                                                                                                                                                                                                                                                                                                                                                                                                                                                                                                                                                                                                                                                                                                                                                                                                                                                                                                                                                                                                                                                                                                                                                                                                                                                                                                                                                                                                                                                                                                                                                                                                                                                                                                                                                                                                                                                                                                                                                                                                                                                                                                                                                                                                                                                                                                                                                                                                                                                                                                                                                                                                                                                                                                                                                                                                                                                                                                                                                                                                                                                                                                                                                                                                                                                                                                                                                                                                                                                                                                                                                                                                                                                                                                                                                                                                                                                                                                                                                                                                                                                                                                                                                                                                                                                                                                                                                                                                                                                                                                                                                                                                                                                                                                                                                                                                                                                                                                                                                                                                                                                                                                                                                                                                                                                                                                                                                                                                                                                                                                                                                                                                                                                                                                                                                                                                                                                                                                                                                                                                                                                                                                                                                                                                                             | see above                                                                                                | Dutch COVID-19 response team                                                                    | National Institute for Public Health and the Environment (RIVM)                                                                                                                                                                                                                                                                                                                                                                                                                                                                                                   | Adam Meijer; AnneMarie van den Brandt; Annelies Kroneman; Bas van der Veer; Chantal Reusken; Dennis Schmitz; Dirk Eggink; Eunice Then; Florian Zwaagmaker; Harry Venema; Ivo van Walle; Jeroen Cremer; Karim Hajji; Kim Freriks; Lisa Wijsman; Lynn Aarts; Rynne Jaarsma; Sanne Bos; Sharon van den Brink; Stijn van Rossum; on behalf of the national COVID-19 response team |
| EPI_ISL_5802165                                                                                                                                                                                                                                                                                                                                                                                                                                                                                                                                                                                                                                                                                                                                                                                                                                                                                                                                                                                                                                                                                                                                                                                                                                                                                                                                                                                                                                                                                                                                                                                                                                                                                                                                                                                                                                                                                                                                                                                                                                                                                                                                                                                                                                                                                                                                                                                                                                                                                                                                                                                                                                                                                                                                                                                                                                                                                                                                                                                                                                                                                                                                                                                                                                                                                                                                                                                                                                                                                                                                                                                                                                                                                                                                                                                                                                                                                                                                                                                                                                                                                                                                                                                                                                                                                                                                                                                                                                                                                                                                                                                                                                                                                                                                                                                                                                                                                                                                                                                                                                                                                                                                                                                                                                                                                                                                                                                                                                                                                                                                                                                                                                                                                                                                                                                                                                                                                                                                                                                                                                                                                                                                                                                                                                                                                                                                                                                                                                                                                                                                                                                                                                                                                                                                                                                                                                                                                                                                                                                                                                                                                                                                                                                                                                                                                                                                                                                                                                                                                                                                                                                                                                                                                                                                                                                                                                                                                                                                                                                                                                                                                                                                                                                                                                                                                                                                                                                                                                                                                                                                                                                                                                                                                                                                                                                                                                                                                                                                                                                                                                                                                                                                                                                                                                                                                                                                                                                                                                                                                                                                                                                                                                                                                                                                                                                                                                                                                                                                                                                                                                                                                                                                                                                                                                                                                                                                                                                                                                                                | Emergencia Respiratoria De Nova Granada                                                                  | Instituto Butantan                                                                              | Antonio Jorge Martins; Claudia Renata dos Santos Barros; David Schlesinger; Debora Botequiu Moretti; Dimas Tadeu Covas; Elaine Cristina Marqueze; Elaine Vieira Santos; Evandra Strazza Rodrigues; Heidge Fukumasu; Jayme Augusto de Souza-Neto; José Salvatore Leister Patané; Luiz Alcantara; Luiz Lehmann Coutinho; Maria Carolina Elias; Mauricio Lacerda Nogueira; Rafael dos Santos Bezerra; Raul Machado Neto; Rejane Maria Tommasini Grotto; Ricardo Haddad; Sandra Coccuzzo Sampaio Vessoni; Simone Kashima; Svetoslav Nanev Slavov; Vincent Louis Viala |                                                                                                                                                                                                                                                                                                                                                                               |
| EPI_ISL_5800822                                                                                                                                                                                                                                                                                                                                                                                                                                                                                                                                                                                                                                                                                                                                                                                                                                                                                                                                                                                                                                                                                                                                                                                                                                                                                                                                                                                                                                                                                                                                                                                                                                                                                                                                                                                                                                                                                                                                                                                                                                                                                                                                                                                                                                                                                                                                                                                                                                                                                                                                                                                                                                                                                                                                                                                                                                                                                                                                                                                                                                                                                                                                                                                                                                                                                                                                                                                                                                                                                                                                                                                                                                                                                                                                                                                                                                                                                                                                                                                                                                                                                                                                                                                                                                                                                                                                                                                                                                                                                                                                                                                                                                                                                                                                                                                                                                                                                                                                                                                                                                                                                                                                                                                                                                                                                                                                                                                                                                                                                                                                                                                                                                                                                                                                                                                                                                                                                                                                                                                                                                                                                                                                                                                                                                                                                                                                                                                                                                                                                                                                                                                                                                                                                                                                                                                                                                                                                                                                                                                                                                                                                                                                                                                                                                                                                                                                                                                                                                                                                                                                                                                                                                                                                                                                                                                                                                                                                                                                                                                                                                                                                                                                                                                                                                                                                                                                                                                                                                                                                                                                                                                                                                                                                                                                                                                                                                                                                                                                                                                                                                                                                                                                                                                                                                                                                                                                                                                                                                                                                                                                                                                                                                                                                                                                                                                                                                                                                                                                                                                                                                                                                                                                                                                                                                                                                                                                                                                                                                                                | Esf M1 Ozi Jaquim Rezende Jales                                                                          | Instituto Butantan                                                                              | Antonio Jorge Martins; Claudia Renata dos Santos Barros; David Schlesinger; Debora Botequiu Moretti; Dimas Tadeu Covas; Elaine Cristina Marqueze; Elaine Vieira Santos; Evandra Strazza Rodrigues; Heidge Fukumasu; Jayme Augusto de Souza-Neto; José Salvatore Leister Patané; Luiz Alcantara; Luiz Lehmann Coutinho; Maria Carolina Elias; Mauricio Lacerda Nogueira; Rafael dos Santos Bezerra; Raul Machado Neto; Rejane Maria Tommasini Grotto; Ricardo Haddad; Sandra Coccuzzo Sampaio Vessoni; Simone Kashima; Svetoslav Nanev Slavov; Vincent Louis Viala |                                                                                                                                                                                                                                                                                                                                                                               |
| EPI_ISL_6166385                                                                                                                                                                                                                                                                                                                                                                                                                                                                                                                                                                                                                                                                                                                                                                                                                                                                                                                                                                                                                                                                                                                                                                                                                                                                                                                                                                                                                                                                                                                                                                                                                                                                                                                                                                                                                                                                                                                                                                                                                                                                                                                                                                                                                                                                                                                                                                                                                                                                                                                                                                                                                                                                                                                                                                                                                                                                                                                                                                                                                                                                                                                                                                                                                                                                                                                                                                                                                                                                                                                                                                                                                                                                                                                                                                                                                                                                                                                                                                                                                                                                                                                                                                                                                                                                                                                                                                                                                                                                                                                                                                                                                                                                                                                                                                                                                                                                                                                                                                                                                                                                                                                                                                                                                                                                                                                                                                                                                                                                                                                                                                                                                                                                                                                                                                                                                                                                                                                                                                                                                                                                                                                                                                                                                                                                                                                                                                                                                                                                                                                                                                                                                                                                                                                                                                                                                                                                                                                                                                                                                                                                                                                                                                                                                                                                                                                                                                                                                                                                                                                                                                                                                                                                                                                                                                                                                                                                                                                                                                                                                                                                                                                                                                                                                                                                                                                                                                                                                                                                                                                                                                                                                                                                                                                                                                                                                                                                                                                                                                                                                                                                                                                                                                                                                                                                                                                                                                                                                                                                                                                                                                                                                                                                                                                                                                                                                                                                                                                                                                                                                                                                                                                                                                                                                                                                                                                                                                                                                                                                | Ethiopian Public Health Institute                                                                        | EPHI Pathogen Genomic Sequence Lab                                                              | ; Abraham Ali; Adamu Tayachew; Adugna Abera; Ahyong, V.; Atsbeha G Weldemariam; Dereje Leta; Detweiler, A.; Eleni Kidane; Fahs Bender, E.; Gadissa Gutema; Getachew Abichu; Getachew Tollera; Gizaw Teka; Kalantar, K.; Neff, N.; Rajiha Abubeker; S.K.; Saro Abdella; Tan, M.; Tato, C.; Tefayse Rufael; Tessema; Vanaerschot, M.                                                                                                                                                                                                                                |                                                                                                                                                                                                                                                                                                                                                                               |
| EPI_ISL_6166358                                                                                                                                                                                                                                                                                                                                                                                                                                                                                                                                                                                                                                                                                                                                                                                                                                                                                                                                                                                                                                                                                                                                                                                                                                                                                                                                                                                                                                                                                                                                                                                                                                                                                                                                                                                                                                                                                                                                                                                                                                                                                                                                                                                                                                                                                                                                                                                                                                                                                                                                                                                                                                                                                                                                                                                                                                                                                                                                                                                                                                                                                                                                                                                                                                                                                                                                                                                                                                                                                                                                                                                                                                                                                                                                                                                                                                                                                                                                                                                                                                                                                                                                                                                                                                                                                                                                                                                                                                                                                                                                                                                                                                                                                                                                                                                                                                                                                                                                                                                                                                                                                                                                                                                                                                                                                                                                                                                                                                                                                                                                                                                                                                                                                                                                                                                                                                                                                                                                                                                                                                                                                                                                                                                                                                                                                                                                                                                                                                                                                                                                                                                                                                                                                                                                                                                                                                                                                                                                                                                                                                                                                                                                                                                                                                                                                                                                                                                                                                                                                                                                                                                                                                                                                                                                                                                                                                                                                                                                                                                                                                                                                                                                                                                                                                                                                                                                                                                                                                                                                                                                                                                                                                                                                                                                                                                                                                                                                                                                                                                                                                                                                                                                                                                                                                                                                                                                                                                                                                                                                                                                                                                                                                                                                                                                                                                                                                                                                                                                                                                                                                                                                                                                                                                                                                                                                                                                                                                                                                                                | Ethiopian Public Health Institute                                                                        | EPHI Pathogen Genomic Sequence Lab and KEMRI-Wellcome Trust Research Programme                  | ; Abraham Ali; Adamu Tayachew; Adugna Abera; Ahyong, V.; Atsbeha G Weldemariam; Dereje Leta; Detweiler, A.; Eleni Kidane; Fahs Bender, E.; Gadissa Gutema; Getachew Abichu; Getachew Tollera; Gizaw Teka; Kalantar, K.; Neff, N.; Rajiha Abubeker; S.K.; Saro Abdella; Tan, M.; Tato, C.; Tefayse Rufael; Tessema; Vanaerschot, M.                                                                                                                                                                                                                                |                                                                                                                                                                                                                                                                                                                                                                               |
| EPI_ISL_5934859, EPI_ISL_5934860, EPI_ISL_5934861, EPI_ISL_5934868, EPI_ISL_5934869, EPI_ISL_5934870, EPI_ISL_5934871, EPI_ISL_5934875, EPI_ISL_5934880                                                                                                                                                                                                                                                                                                                                                                                                                                                                                                                                                                                                                                                                                                                                                                                                                                                                                                                                                                                                                                                                                                                                                                                                                                                                                                                                                                                                                                                                                                                                                                                                                                                                                                                                                                                                                                                                                                                                                                                                                                                                                                                                                                                                                                                                                                                                                                                                                                                                                                                                                                                                                                                                                                                                                                                                                                                                                                                                                                                                                                                                                                                                                                                                                                                                                                                                                                                                                                                                                                                                                                                                                                                                                                                                                                                                                                                                                                                                                                                                                                                                                                                                                                                                                                                                                                                                                                                                                                                                                                                                                                                                                                                                                                                                                                                                                                                                                                                                                                                                                                                                                                                                                                                                                                                                                                                                                                                                                                                                                                                                                                                                                                                                                                                                                                                                                                                                                                                                                                                                                                                                                                                                                                                                                                                                                                                                                                                                                                                                                                                                                                                                                                                                                                                                                                                                                                                                                                                                                                                                                                                                                                                                                                                                                                                                                                                                                                                                                                                                                                                                                                                                                                                                                                                                                                                                                                                                                                                                                                                                                                                                                                                                                                                                                                                                                                                                                                                                                                                                                                                                                                                                                                                                                                                                                                                                                                                                                                                                                                                                                                                                                                                                                                                                                                                                                                                                                                                                                                                                                                                                                                                                                                                                                                                                                                                                                                                                                                                                                                                                                                                                                                                                                                                                                                                                                                                        | see above                                                                                                | Finlab Laboratoriot Oy Tampere                                                                  | Expert Microbiology, National Institute for Health and Welfare                                                                                                                                                                                                                                                                                                                                                                                                                                                                                                    | Carita Savolainen-Koppa; Erika Lindh; Haider al-Helilo; Jani Halkihti; Kirsi Liitsola; Niina Ikonen; Olli Vapalahti; Pekka Ellonen; Phuoc Truong; Päivi Laurila; Ravi Kant; Sari Hannula; Soile Blomqvist; Teemu Smura                                                                                                                                                        |
| EPI_ISL_5866403, EPI_ISL_5866404, EPI_ISL_5866405, EPI_ISL_5866406, EPI_ISL_5866407, EPI_ISL_5866408, EPI_ISL_5866409, EPI_ISL_5866410, EPI_ISL_5866413, EPI_ISL_5866416, EPI_ISL_5866417, EPI_ISL_5866418, EPI_ISL_5866419, EPI_ISL_5866422, EPI_ISL_5866423, EPI_ISL_5866424, EPI_ISL_5866425, EPI_ISL_5866426, EPI_ISL_5866427, EPI_ISL_5866428, EPI_ISL_5866429, EPI_ISL_5866430, EPI_ISL_5866431, EPI_ISL_5866432, EPI_ISL_5866433, EPI_ISL_5866434, EPI_ISL_5866435, EPI_ISL_5866436, EPI_ISL_5866437, EPI_ISL_5866438, EPI_ISL_5866439, EPI_ISL_5866440, EPI_ISL_5866441, EPI_ISL_5866442, EPI_ISL_5866443, EPI_ISL_5866444, EPI_ISL_5866445, EPI_ISL_5866446, EPI_ISL_5866447, EPI_ISL_5866448, EPI_ISL_5866449, EPI_ISL_5866450, EPI_ISL_5866451, EPI_ISL_5866452, EPI_ISL_5866453, EPI_ISL_5866454, EPI_ISL_5866455, EPI_ISL_5866456, EPI_ISL_5866457, EPI_ISL_5866458, EPI_ISL_5866459, EPI_ISL_5866460, EPI_ISL_5866461, EPI_ISL_5866462, EPI_ISL_5866463, EPI_ISL_5866464, EPI_ISL_5866465, EPI_ISL_5866466, EPI_ISL_5866467, EPI_ISL_5866468, EPI_ISL_5866469, EPI_ISL_5866470, EPI_ISL_5866471, EPI_ISL_5866472, EPI_ISL_5866473, EPI_ISL_5866474, EPI_ISL_5866475, EPI_ISL_5866476, EPI_ISL_5866477, EPI_ISL_5866478, EPI_ISL_5866479, EPI_ISL_5866480, EPI_ISL_5866481, EPI_ISL_5866482, EPI_ISL_5866483, EPI_ISL_5866484, EPI_ISL_5866485, EPI_ISL_5866486, EPI_ISL_5866487, EPI_ISL_5866488, EPI_ISL_5866489, EPI_ISL_5866490, EPI_ISL_5866491, EPI_ISL_5866492, EPI_ISL_5866493, EPI_ISL_5866494, EPI_ISL_5866495, EPI_ISL_5866496, EPI_ISL_5866497, EPI_ISL_5866498, EPI_ISL_5866499, EPI_ISL_5866500, EPI_ISL_5866501, EPI_ISL_5866502, EPI_ISL_5866503, EPI_ISL_5866504, EPI_ISL_5866505, EPI_ISL_5866506, EPI_ISL_5866507, EPI_ISL_5866508, EPI_ISL_5866509, EPI_ISL_5866510, EPI_ISL_5866511, EPI_ISL_5866512, EPI_ISL_5866513, EPI_ISL_5866514, EPI_ISL_5866515, EPI_ISL_5866516, EPI_ISL_5866517, EPI_ISL_5866518, EPI_ISL_5866519, EPI_ISL_5866520, EPI_ISL_5866521, EPI_ISL_5866522, EPI_ISL_5866523, EPI_ISL_5866524, EPI_ISL_5866525, EPI_ISL_5866526, EPI_ISL_5866527, EPI_ISL_5866528, EPI_ISL_5866529, EPI_ISL_5866530, EPI_ISL_5866531, EPI_ISL_5866532, EPI_ISL_5866533, EPI_ISL_5866534, EPI_ISL_5866535, EPI_ISL_5866536, EPI_ISL_5866537, EPI_ISL_5866538, EPI_ISL_5866539, EPI_ISL_5866540, EPI_ISL_5866541, EPI_ISL_5866542, EPI_ISL_5866543, EPI_ISL_5866544, EPI_ISL_5866545, EPI_ISL_5866546, EPI_ISL_5866547, EPI_ISL_5866548, EPI_ISL_5866549, EPI_ISL_5866550, EPI_ISL_5866551, EPI_ISL_5866552, EPI_ISL_5866553, EPI_ISL_5866554, EPI_ISL_5866555, EPI_ISL_5866556, EPI_ISL_5866557, EPI_ISL_5866558, EPI_ISL_5866559, EPI_ISL_5866560, EPI_ISL_5866561, EPI_ISL_5866562, EPI_ISL_5866563, EPI_ISL_5866564, EPI_ISL_5866565, EPI_ISL_5866566, EPI_ISL_5866567, EPI_ISL_5866568, EPI_ISL_5866569, EPI_ISL_5866570, EPI_ISL_5866571, EPI_ISL_5866572, EPI_ISL_5866573, EPI_ISL_5866574, EPI_ISL_5866575, EPI_ISL_5866576, EPI_ISL_5866577, EPI_ISL_5866578, EPI_ISL_5866579, EPI_ISL_5866580, EPI_ISL_5866581, EPI_ISL_5866582, EPI_ISL_5866583, EPI_ISL_5866584, EPI_ISL_5866585, EPI_ISL_5866586, EPI_ISL_5866587, EPI_ISL_5866588, EPI_ISL_5866589, EPI_ISL_5866590, EPI_ISL_5866591, EPI_ISL_5866592, EPI_ISL_5866593, EPI_ISL_5866594, EPI_ISL_5866595, EPI_ISL_5866596, EPI_ISL_5866597, EPI_ISL_5866598, EPI_ISL_5866599, EPI_ISL_5866600, EPI_ISL_5866601, EPI_ISL_5866602, EPI_ISL_5866603, EPI_ISL_5866604, EPI_ISL_5866605, EPI_ISL_5866606, EPI_ISL_5866607, EPI_ISL_5866608, EPI_ISL_5866609, EPI_ISL_5866610, EPI_ISL_5866611, EPI_ISL_5866612, EPI_ISL_5866613, EPI_ISL_5866614, EPI_ISL_5866615, EPI_ISL_5866616, EPI_ISL_5866617, EPI_ISL_5866618, EPI_ISL_5866619, EPI_ISL_5866620, EPI_ISL_5866621, EPI_ISL_5866622, EPI_ISL_5866623, EPI_ISL_5866624, EPI_ISL_5866625, EPI_ISL_5866626, EPI_ISL_5866627, EPI_ISL_5866628, EPI_ISL_5866629, EPI_ISL_5866630, EPI_ISL_5866631, EPI_ISL_5866632, EPI_ISL_5866633, EPI_ISL_5866634, EPI_ISL_5866635, EPI_ISL_5866636, EPI_ISL_5866637, EPI_ISL_5866638, EPI_ISL_5866639, EPI_ISL_5866640, EPI_ISL_5866641, EPI_ISL_5866642, EPI_ISL_5866643, EPI_ISL_5866644, EPI_ISL_5866645, EPI_ISL_5866646, EPI_ISL_5866647, EPI_ISL_5866648, EPI_ISL_5866649, EPI_ISL_5866650, EPI_ISL_5866651, EPI_ISL_5866652, EPI_ISL_5866653, EPI_ISL_5866654, EPI_ISL_5866655, EPI_ISL_5866656, EPI_ISL_5866657, EPI_ISL_5866658, EPI_ISL_5866659, EPI_ISL_5866660, EPI_ISL_5866661, EPI_ISL_5866662, EPI_ISL_5866663, EPI_ISL_5866664, EPI_ISL_5866665, EPI_ISL_5866666, EPI_ISL_5866667, EPI_ISL_5866668, EPI_ISL_5866669, EPI_ISL_5866670, EPI_ISL_5866671, EPI_ISL_5866672, EPI_ISL_5866673, EPI_ISL_5866674, EPI_ISL_5866675, EPI_ISL_5866676, EPI_ISL_5866677, EPI_ISL_5866678, EPI_ISL_5866679, EPI_ISL_5866680, EPI_ISL_5866681, EPI_ISL_5866682, EPI_ISL_5866683, EPI_ISL_5866684, EPI_ISL_5866685, EPI_ISL_5866686, EPI_ISL_5866687, EPI_ISL_5866688, EPI_ISL_5866689, EPI_ISL_5866690, EPI_ISL_5866691, EPI_ISL_5866692, EPI_ISL_5866693, EPI_ISL_5866694, EPI_ISL_5866695, EPI_ISL_5866696, EPI_ISL_5866697, EPI_ISL_5866698, EPI_ISL_5866699, EPI_ISL_5866700, EPI_ISL_5866701, EPI_ISL_5866702, EPI_ISL_5866703, EPI_ISL_5866704, EPI_ISL_5866705, EPI_ISL_5866706, EPI_ISL_5866707, EPI_ISL_5866708, EPI_ISL_5866709, EPI_ISL_5866710, EPI_ISL_5866711, EPI_ISL_5866712, EPI_ISL_5866713, EPI_ISL_5866714, EPI_ISL_5866715, EPI_ISL_5866716, EPI_ISL_5866717, EPI_ISL_5866718, EPI_ISL_5866719, EPI_ISL_5866720, EPI_ISL_5866721, EPI_ISL_5866722, EPI_ISL_5866723, EPI_ISL_5866724, EPI_ISL_5866725, EPI_ISL_5866726, EPI_ISL_5866727, EPI_ISL_5866728, EPI_ISL_5866729, EPI_ISL_5866730, EPI_ISL_5866731, EPI_ISL_5866732, EPI_ISL_5866733, EPI_ISL_5866734, EPI_ISL_5866735, EPI_ISL_5866736, EPI_ISL_5866737, EPI_ISL_5866738, EPI_ISL_5866739, EPI_ISL_5866740, EPI_ISL_5866741, EPI_ISL_5866742, EPI_ISL_5866743, EPI_ISL_5866744, EPI_ISL_5866745, EPI_ISL_5866746, EPI_ISL_5866747, EPI_ISL_5866748, EPI_ISL_5866749, EPI_ISL_5866750, EPI_ISL_5866751, EPI_ISL_5866752, EPI_ISL_5866753, EPI_ISL_5866754, EPI_ISL_5866755, EPI_ISL_5866756, EPI_ISL_5866757, EPI_ISL_5866758, EPI_ISL_5866759, EPI_ISL_5866760, EPI_ISL_5866761, EPI_ISL_5866762, EPI_ISL_5866763, EPI_ISL_5866764, EPI_ISL_5866765, EPI_ISL_5866766, EPI_ISL_5866767, EPI_ISL_5866768, EPI_ISL_5866769, EPI_ISL_5866770, EPI_ISL_5866771, EPI_ISL_5866772, EPI_ISL_5866773, EPI_ISL_5866774, EPI_ISL_5866775, EPI_ISL_5866776, EPI_ISL_5866777, EPI_ISL_5866778, EPI_ISL_5866779, EPI_ISL_5866780, EPI_ISL_5866781, EPI_ISL_5866782, EPI_ISL_5866783, EPI_ISL_5866784, EPI_ISL_5866785, EPI_ISL_5866786, EPI_ISL_5866787, EPI_ISL_5866788, EPI_ISL_5866789, EPI_ISL_5866790, EPI_ISL_5866791, EPI_ISL_5866792, EPI_ISL_5866793, EPI_ISL_5866794, EPI_ISL_5866795, EPI_ISL_5866796, EPI_ISL_5866797, EPI_ISL_5866798, EPI_ISL_5866799, EPI_ISL_5866800, EPI_ISL_5866801, EPI_ISL_5866802, EPI_ISL_5866803, EPI_ISL_5866804, EPI_ISL_5866805, EPI_ISL_5866806, EPI_ISL_5866807, EPI_ISL_5866808, EPI_ISL_5866809, EPI_ISL_5866810, EPI_ISL_5866811, EPI_ISL_5866812, EPI_ISL_5866813, EPI_ISL_5866814, EPI_ISL_5866815, EPI_ISL_5866816, EPI_ISL_5866817, EPI_ISL_5866818, EPI_ISL_5866819, EPI_ISL_5866820, EPI_ISL_5866821, EPI_ISL_5866822, EPI_ISL_5866823, EPI_ISL_5866824, EPI_ISL_5866825, EPI_ISL_5866826, EPI_ISL_5866827, EPI_ISL_5866828, EPI_ISL_5866829, EPI_ISL_5866830, EPI_ISL_5866831, EPI_ISL_5866832, EPI_ISL_5866833, EPI_ISL_5866834, EPI_ISL_5866835, EPI_ISL_5866836, EPI_ISL_5866837, EPI_ISL_5866838, EPI_ISL_5866839, EPI_ISL_5866840, EPI_ISL_5866841, EPI_ISL_5866842, EPI_ISL_5866843, EPI_ISL_5866844, EPI_ISL_5866845, EPI_ISL_5866846, EPI_ISL_5866847, EPI_ISL_5866848, EPI_ISL_5866849, EPI_ISL_5866850, EPI_ISL_5866851, EPI_ISL_5866852, EPI_ISL_5866853, EPI_ISL_5866854, EPI_ISL_5866855, EPI_ISL_5866856, EPI_ISL_5866857, EPI_ISL_5866858, EPI_ISL_5866859, EPI_ISL_5866860, EPI_ISL_5866861, EPI_ISL_5866862, EPI_ISL_5866863, EPI_ISL_5866864, EPI_ISL_5866865, EPI_ISL_5866866, EPI_ISL_5866867, EPI_ISL_5866868, EPI_ISL_5866869, EPI_ISL_5866870, EPI_ISL_5866871, EPI_ISL_5866872, EPI_ISL_5866873, EPI_ISL_5866874, EPI_ISL_5866875, EPI_ISL_5866876, EPI_ISL_5866877, EPI_ISL_5866878, EPI_ISL_5866879, EPI_ISL_5866880, EPI_ISL_5866881, EPI_ISL_5866882, EPI_ISL_5866883, EPI_ISL_5866884, EPI_ISL_5866885, EPI_ISL_5866886, EPI_ISL_5866887, EPI_ISL_5866888, EPI_ISL_5866889, EPI_ISL_5866890, EPI_ISL_5866891, EPI_ISL_5866892, EPI_ISL_5866893, EPI_ISL_5866894, EPI_ISL_5866895, EPI_ISL_5866896, EPI_ISL_5866897, EPI_ISL_5866898, EPI_ISL_5866899, EPI_ISL_5866900, EPI_ISL_5866901, EPI_ISL_5866902, EPI_ISL_5866903, EPI_ISL_5866904, EPI_ISL_5866905, EPI_ISL_5866906, EPI_ISL_5866907, EPI_ISL_5866908, EPI_ISL_5866909, EPI_ISL_5866910, EPI_ISL_5866911, EPI_ISL_5866912, EPI_ISL_5866913, EPI_ISL_5866914, EPI_ISL_5866915, EPI_ISL_5866916, EPI_ISL_5866917, EPI_ISL_5866918, EPI_ISL_5866919, EPI_ISL_5866920, EPI_ISL_5866921, EPI_ISL_5866922, EPI_ISL_5866923, EPI_ISL_5866924, EPI_ISL_5866925, EPI_ISL_5866926, EPI_ISL_5866927, EPI_ISL_5866928, EPI_ISL_5866929, EPI_ISL_5866930, EPI_ISL_5866931, EPI_ISL_5866932, EPI_ISL_5866933, EPI_ISL_5866934, EPI_ISL_5866935, EPI_ISL_5866936, EPI_ISL_5866937, EPI_ISL_5866938, EPI_ISL_5866939, EPI_ISL_5866940, EPI_ISL_5866941, EPI_ISL_5866942, EPI_ISL_5866943, EPI_ISL_5866944, EPI_ISL_5866945, EPI_ISL_5866946, EPI_ISL_5866947, EPI_ISL_5866948, EPI_ISL_5866949, EPI_ISL_5866950, EPI_ISL_5866951, EPI_ISL_5866952, EPI_ISL_5866953, EPI_ISL_5866954, EPI_ISL_5866955, EPI_ISL_5866956, EPI_ISL_5866957, EPI_ISL_5866958, EPI_ISL_5866959, EPI_ISL_5866960, EPI_ISL_5866961, EPI_ISL_5866962, EPI_ISL_5866963, EPI_ISL_5866964, EPI_ISL_5866965, EPI_ISL_5866966, EPI_ISL_5866967, EPI_ISL_5866968, EPI_ISL_5866969, EPI_ISL_5866970, EPI_ISL_5866971, EPI_ISL_5866972, EPI_ISL_5866973, EPI_ISL_5866974, EPI_ISL_5866975, EPI_ISL_5866976, EPI_ISL_5866977, EPI_ISL_5866978, EPI_ISL_5866979, EPI_ISL_5866980, EPI_ISL_5866981, EPI_ISL_5866982, EPI_ISL_5866983, EPI_ISL_5866984, EPI_ISL_5866985, EPI_ISL_5866986, EPI_ISL_5866987, EPI_ISL_5866988, EPI_ISL_5866989, EPI_ISL_5866990, EPI_ISL_5866991, EPI_ISL_5866992, EPI_ISL_5866993, EPI_ISL_5866994, EPI_ISL_5866995, EPI_ISL_5866996, EPI_ISL_5866997, EPI_ISL_5866998, EPI_ISL_5866999, EPI_ISL_5867000 |                                                                                                          |                                                                                                 |                                                                                                                                                                                                                                                                                                                                                                                                                                                                                                                                                                   |                                                                                                                                                                                                                                                                                                                                                                               |
| see above                                                                                                                                                                                                                                                                                                                                                                                                                                                                                                                                                                                                                                                                                                                                                                                                                                                                                                                                                                                                                                                                                                                                                                                                                                                                                                                                                                                                                                                                                                                                                                                                                                                                                                                                                                                                                                                                                                                                                                                                                                                                                                                                                                                                                                                                                                                                                                                                                                                                                                                                                                                                                                                                                                                                                                                                                                                                                                                                                                                                                                                                                                                                                                                                                                                                                                                                                                                                                                                                                                                                                                                                                                                                                                                                                                                                                                                                                                                                                                                                                                                                                                                                                                                                                                                                                                                                                                                                                                                                                                                                                                                                                                                                                                                                                                                                                                                                                                                                                                                                                                                                                                                                                                                                                                                                                                                                                                                                                                                                                                                                                                                                                                                                                                                                                                                                                                                                                                                                                                                                                                                                                                                                                                                                                                                                                                                                                                                                                                                                                                                                                                                                                                                                                                                                                                                                                                                                                                                                                                                                                                                                                                                                                                                                                                                                                                                                                                                                                                                                                                                                                                                                                                                                                                                                                                                                                                                                                                                                                                                                                                                                                                                                                                                                                                                                                                                                                                                                                                                                                                                                                                                                                                                                                                                                                                                                                                                                                                                                                                                                                                                                                                                                                                                                                                                                                                                                                                                                                                                                                                                                                                                                                                                                                                                                                                                                                                                                                                                                                                                                                                                                                                                                                                                                                                                                                                                                                                                                                                                                      | Florida Bureau of Public Health Laboratories                                                             | Florida Bureau of Public Health Laboratories                                                    |                                                                                                                                                                                                                                                                                                                                                                                                                                                                                                                                                                   | Jason Blanton; Namratha Tarigopula; Sarah Schmedes; Tiffany Splatt                                                                                                                                                                                                                                                                                                            |
| EPI_ISL_5798552, EPI_ISL_5798564, EPI_ISL_5798588, EPI_ISL_5798628, EPI_ISL_5798638                                                                                                                                                                                                                                                                                                                                                                                                                                                                                                                                                                                                                                                                                                                                                                                                                                                                                                                                                                                                                                                                                                                                                                                                                                                                                                                                                                                                                                                                                                                                                                                                                                                                                                                                                                                                                                                                                                                                                                                                                                                                                                                                                                                                                                                                                                                                                                                                                                                                                                                                                                                                                                                                                                                                                                                                                                                                                                                                                                                                                                                                                                                                                                                                                                                                                                                                                                                                                                                                                                                                                                                                                                                                                                                                                                                                                                                                                                                                                                                                                                                                                                                                                                                                                                                                                                                                                                                                                                                                                                                                                                                                                                                                                                                                                                                                                                                                                                                                                                                                                                                                                                                                                                                                                                                                                                                                                                                                                                                                                                                                                                                                                                                                                                                                                                                                                                                                                                                                                                                                                                                                                                                                                                                                                                                                                                                                                                                                                                                                                                                                                                                                                                                                                                                                                                                                                                                                                                                                                                                                                                                                                                                                                                                                                                                                                                                                                                                                                                                                                                                                                                                                                                                                                                                                                                                                                                                                                                                                                                                                                                                                                                                                                                                                                                                                                                                                                                                                                                                                                                                                                                                                                                                                                                                                                                                                                                                                                                                                                                                                                                                                                                                                                                                                                                                                                                                                                                                                                                                                                                                                                                                                                                                                                                                                                                                                                                                                                                                                                                                                                                                                                                                                                                                                                                                                                                                                                                                            | GENEPATH                                                                                                 | NCL, Pune                                                                                       |                                                                                                                                                                                                                                                                                                                                                                                                                                                                                                                                                                   | ; Ajinkya Khilari; Anu Raghunathan; Bhagyashree Litkar; Dhanasekaran Shanmugam; Divya Niveditha; Shikha Takur; Sucheta                                                                                                                                                                                                                                                        |
| EPI_ISL_6153235, EPI_ISL_6153238                                                                                                                                                                                                                                                                                                                                                                                                                                                                                                                                                                                                                                                                                                                                                                                                                                                                                                                                                                                                                                                                                                                                                                                                                                                                                                                                                                                                                                                                                                                                                                                                                                                                                                                                                                                                                                                                                                                                                                                                                                                                                                                                                                                                                                                                                                                                                                                                                                                                                                                                                                                                                                                                                                                                                                                                                                                                                                                                                                                                                                                                                                                                                                                                                                                                                                                                                                                                                                                                                                                                                                                                                                                                                                                                                                                                                                                                                                                                                                                                                                                                                                                                                                                                                                                                                                                                                                                                                                                                                                                                                                                                                                                                                                                                                                                                                                                                                                                                                                                                                                                                                                                                                                                                                                                                                                                                                                                                                                                                                                                                                                                                                                                                                                                                                                                                                                                                                                                                                                                                                                                                                                                                                                                                                                                                                                                                                                                                                                                                                                                                                                                                                                                                                                                                                                                                                                                                                                                                                                                                                                                                                                                                                                                                                                                                                                                                                                                                                                                                                                                                                                                                                                                                                                                                                                                                                                                                                                                                                                                                                                                                                                                                                                                                                                                                                                                                                                                                                                                                                                                                                                                                                                                                                                                                                                                                                                                                                                                                                                                                                                                                                                                                                                                                                                                                                                                                                                                                                                                                                                                                                                                                                                                                                                                                                                                                                                                                                                                                                                                                                                                                                                                                                                                                                                                                                                                                                                                                                                               | Genepath, Pune                                                                                           | RF-IISER Pune                                                                                   |                                                                                                                                                                                                                                                                                                                                                                                                                                                                                                                                                                   | Aurnab Ghose; Joy Merwin Monteiro; Krishanpal Karmodiya; Nikhil Phadke; Shatakshi Ranade                                                                                                                                                                                                                                                                                      |
| EPI_ISL_5804847, EPI_ISL_5804854                                                                                                                                                                                                                                                                                                                                                                                                                                                                                                                                                                                                                                                                                                                                                                                                                                                                                                                                                                                                                                                                                                                                                                                                                                                                                                                                                                                                                                                                                                                                                                                                                                                                                                                                                                                                                                                                                                                                                                                                                                                                                                                                                                                                                                                                                                                                                                                                                                                                                                                                                                                                                                                                                                                                                                                                                                                                                                                                                                                                                                                                                                                                                                                                                                                                                                                                                                                                                                                                                                                                                                                                                                                                                                                                                                                                                                                                                                                                                                                                                                                                                                                                                                                                                                                                                                                                                                                                                                                                                                                                                                                                                                                                                                                                                                                                                                                                                                                                                                                                                                                                                                                                                                                                                                                                                                                                                                                                                                                                                                                                                                                                                                                                                                                                                                                                                                                                                                                                                                                                                                                                                                                                                                                                                                                                                                                                                                                                                                                                                                                                                                                                                                                                                                                                                                                                                                                                                                                                                                                                                                                                                                                                                                                                                                                                                                                                                                                                                                                                                                                                                                                                                                                                                                                                                                                                                                                                                                                                                                                                                                                                                                                                                                                                                                                                                                                                                                                                                                                                                                                                                                                                                                                                                                                                                                                                                                                                                                                                                                                                                                                                                                                                                                                                                                                                                                                                                                                                                                                                                                                                                                                                                                                                                                                                                                                                                                                                                                                                                                                                                                                                                                                                                                                                                                                                                                                                                                                                                                               | Genome Analysis Center, Yamanashi Central Hospital                                                       | Genome Analysis Center, Yamanashi Central Hospital                                              |                                                                                                                                                                                                                                                                                                                                                                                                                                                                                                                                                                   | Yosuke Hirotsu                                                                                                                                                                                                                                                                                                                                                                |
| EPI_ISL_6516221, EPI_ISL_6516226, EPI_ISL_6516227, EPI_ISL_6517114, EPI_ISL_6517116, EPI_ISL_6517123, EPI_ISL_6517138, EPI_ISL_6517145, EPI_ISL_6517152                                                                                                                                                                                                                                                                                                                                                                                                                                                                                                                                                                                                                                                                                                                                                                                                                                                                                                                                                                                                                                                                                                                                                                                                                                                                                                                                                                                                                                                                                                                                                                                                                                                                                                                                                                                                                                                                                                                                                                                                                                                                                                                                                                                                                                                                                                                                                                                                                                                                                                                                                                                                                                                                                                                                                                                                                                                                                                                                                                                                                                                                                                                                                                                                                                                                                                                                                                                                                                                                                                                                                                                                                                                                                                                                                                                                                                                                                                                                                                                                                                                                                                                                                                                                                                                                                                                                                                                                                                                                                                                                                                                                                                                                                                                                                                                                                                                                                                                                                                                                                                                                                                                                                                                                                                                                                                                                                                                                                                                                                                                                                                                                                                                                                                                                                                                                                                                                                                                                                                                                                                                                                                                                                                                                                                                                                                                                                                                                                                                                                                                                                                                                                                                                                                                                                                                                                                                                                                                                                                                                                                                                                                                                                                                                                                                                                                                                                                                                                                                                                                                                                                                                                                                                                                                                                                                                                                                                                                                                                                                                                                                                                                                                                                                                                                                                                                                                                                                                                                                                                                                                                                                                                                                                                                                                                                                                                                                                                                                                                                                                                                                                                                                                                                                                                                                                                                                                                                                                                                                                                                                                                                                                                                                                                                                                                                                                                                                                                                                                                                                                                                                                                                                                                                                                                                                                                                                        | see above                                                                                                | Genome Information Research Center, Research Institute for Microbial Diseases, Osaka University | Genome Information Research Center, Research Institute for Microbial Diseases, Osaka University                                                                                                                                                                                                                                                                                                                                                                                                                                                                   | Daisuke Motooka; Hiroya Oki; Kentaro Tanaka; and Shota Nakamura                                                                                                                                                                                                                                                                                                               |
| EPI_ISL_5917906                                                                                                                                                                                                                                                                                                                                                                                                                                                                                                                                                                                                                                                                                                                                                                                                                                                                                                                                                                                                                                                                                                                                                                                                                                                                                                                                                                                                                                                                                                                                                                                                                                                                                                                                                                                                                                                                                                                                                                                                                                                                                                                                                                                                                                                                                                                                                                                                                                                                                                                                                                                                                                                                                                                                                                                                                                                                                                                                                                                                                                                                                                                                                                                                                                                                                                                                                                                                                                                                                                                                                                                                                                                                                                                                                                                                                                                                                                                                                                                                                                                                                                                                                                                                                                                                                                                                                                                                                                                                                                                                                                                                                                                                                                                                                                                                                                                                                                                                                                                                                                                                                                                                                                                                                                                                                                                                                                                                                                                                                                                                                                                                                                                                                                                                                                                                                                                                                                                                                                                                                                                                                                                                                                                                                                                                                                                                                                                                                                                                                                                                                                                                                                                                                                                                                                                                                                                                                                                                                                                                                                                                                                                                                                                                                                                                                                                                                                                                                                                                                                                                                                                                                                                                                                                                                                                                                                                                                                                                                                                                                                                                                                                                                                                                                                                                                                                                                                                                                                                                                                                                                                                                                                                                                                                                                                                                                                                                                                                                                                                                                                                                                                                                                                                                                                                                                                                                                                                                                                                                                                                                                                                                                                                                                                                                                                                                                                                                                                                                                                                                                                                                                                                                                                                                                                                                                                                                                                                                                                                                | Glencore Rustenburg Smelter                                                                              | National Institute for Communicable Diseases of the National Health Laboratory Service          |                                                                                                                                                                                                                                                                                                                                                                                                                                                                                                                                                                   | Amaok DG; Bhiman JN; Everatt J; Ismail A; Mahlangu B; Mnguni A; Mohale T; Ntuli N; Scheepers C                                                                                                                                                                                                                                                                                |
| EPI_ISL_5802402                                                                                                                                                                                                                                                                                                                                                                                                                                                                                                                                                                                                                                                                                                                                                                                                                                                                                                                                                                                                                                                                                                                                                                                                                                                                                                                                                                                                                                                                                                                                                                                                                                                                                                                                                                                                                                                                                                                                                                                                                                                                                                                                                                                                                                                                                                                                                                                                                                                                                                                                                                                                                                                                                                                                                                                                                                                                                                                                                                                                                                                                                                                                                                                                                                                                                                                                                                                                                                                                                                                                                                                                                                                                                                                                                                                                                                                                                                                                                                                                                                                                                                                                                                                                                                                                                                                                                                                                                                                                                                                                                                                                                                                                                                                                                                                                                                                                                                                                                                                                                                                                                                                                                                                                                                                                                                                                                                                                                                                                                                                                                                                                                                                                                                                                                                                                                                                                                                                                                                                                                                                                                                                                                                                                                                                                                                                                                                                                                                                                                                                                                                                                                                                                                                                                                                                                                                                                                                                                                                                                                                                                                                                                                                                                                                                                                                                                                                                                                                                                                                                                                                                                                                                                                                                                                                                                                                                                                                                                                                                                                                                                                                                                                                                                                                                                                                                                                                                                                                                                                                                                                                                                                                                                                                                                                                                                                                                                                                                                                                                                                                                                                                                                                                                                                                                                                                                                                                                                                                                                                                                                                                                                                                                                                                                                                                                                                                                                                                                                                                                                                                                                                                                                                                                                                                                                                                                                                                                                                                                                | Grupo Tecnico De Vigilancia Sanitaria E Epidemiologica                                                   | Instituto Butantan                                                                              | Antonio Jorge Martins; Claudia Renata dos Santos Barros; David Schlesinger; Debora Botequiu Moretti; Dimas Tadeu Covas; Elaine Cristina Marqueze; Elaine Vieira Santos; Evandra Strazza Rodrigues; Heidge Fukumasu; Jayme Augusto de Souza-Neto; José Salvatore Leister Patané; Luiz Alcantara; Luiz Lehmann Coutinho; Maria Carolina Elias; Mauricio Lacerda Nogueira; Rafael dos Santos Bezerra; Raul Machado Neto; Rejane Maria Tommasini Grotto; Ricardo Haddad; Sandra Coccuzzo Sampaio Vessoni; Simone Kashima; Svetoslav Nanev Slavov; Vincent Louis Viala |                                                                                                                                                                                                                                                                                                                                                                               |
| EPI_ISL_6473478, EPI_ISL_6473482                                                                                                                                                                                                                                                                                                                                                                                                                                                                                                                                                                                                                                                                                                                                                                                                                                                                                                                                                                                                                                                                                                                                                                                                                                                                                                                                                                                                                                                                                                                                                                                                                                                                                                                                                                                                                                                                                                                                                                                                                                                                                                                                                                                                                                                                                                                                                                                                                                                                                                                                                                                                                                                                                                                                                                                                                                                                                                                                                                                                                                                                                                                                                                                                                                                                                                                                                                                                                                                                                                                                                                                                                                                                                                                                                                                                                                                                                                                                                                                                                                                                                                                                                                                                                                                                                                                                                                                                                                                                                                                                                                                                                                                                                                                                                                                                                                                                                                                                                                                                                                                                                                                                                                                                                                                                                                                                                                                                                                                                                                                                                                                                                                                                                                                                                                                                                                                                                                                                                                                                                                                                                                                                                                                                                                                                                                                                                                                                                                                                                                                                                                                                                                                                                                                                                                                                                                                                                                                                                                                                                                                                                                                                                                                                                                                                                                                                                                                                                                                                                                                                                                                                                                                                                                                                                                                                                                                                                                                                                                                                                                                                                                                                                                                                                                                                                                                                                                                                                                                                                                                                                                                                                                                                                                                                                                                                                                                                                                                                                                                                                                                                                                                                                                                                                                                                                                                                                                                                                                                                                                                                                                                                                                                                                                                                                                                                                                                                                                                                                                                                                                                                                                                                                                                                                                                                                                                                                                                                                                               | Guam Public Health Laboratory                                                                            | Centers for Disease Control and Prevention Division of Viral Diseases, Pathogen Discovery       | Alex Burgin; Ben Rambo-Martin; Clinton Paden; Dakota Howard; Dave Wentworth; Dhvani Batra; Jasmine Padilla; Joseph Maddox; Justin Lee; Kristen Nipke; Kristina Lacey; Mark Burroughs; Matthew Schmer; Meghan Bentz; Mill Sheth; Peter Cook; Sam Shepard; Sarah Nobes; Vivian Dugan; Yvette Unoarumhi                                                                                                                                                                                                                                                              |                                                                                                                                                                                                                                                                                                                                                                               |
| EPI_ISL_5967133, EPI_ISL_5967134, EPI_ISL_5967135                                                                                                                                                                                                                                                                                                                                                                                                                                                                                                                                                                                                                                                                                                                                                                                                                                                                                                                                                                                                                                                                                                                                                                                                                                                                                                                                                                                                                                                                                                                                                                                                                                                                                                                                                                                                                                                                                                                                                                                                                                                                                                                                                                                                                                                                                                                                                                                                                                                                                                                                                                                                                                                                                                                                                                                                                                                                                                                                                                                                                                                                                                                                                                                                                                                                                                                                                                                                                                                                                                                                                                                                                                                                                                                                                                                                                                                                                                                                                                                                                                                                                                                                                                                                                                                                                                                                                                                                                                                                                                                                                                                                                                                                                                                                                                                                                                                                                                                                                                                                                                                                                                                                                                                                                                                                                                                                                                                                                                                                                                                                                                                                                                                                                                                                                                                                                                                                                                                                                                                                                                                                                                                                                                                                                                                                                                                                                                                                                                                                                                                                                                                                                                                                                                                                                                                                                                                                                                                                                                                                                                                                                                                                                                                                                                                                                                                                                                                                                                                                                                                                                                                                                                                                                                                                                                                                                                                                                                                                                                                                                                                                                                                                                                                                                                                                                                                                                                                                                                                                                                                                                                                                                                                                                                                                                                                                                                                                                                                                                                                                                                                                                                                                                                                                                                                                                                                                                                                                                                                                                                                                                                                                                                                                                                                                                                                                                                                                                                                                                                                                                                                                                                                                                                                                                                                                                                                                                                                                                              | HOSPITAL COMARCAL DE MELILLA                                                                             | Instituto de Salud Carlos III                                                                   | A. Monzón; F. Casas; I. Jiménez; I.ROMAN SODIA; M. Sandonis; P. Zaballos; S. Cuesta; S. Iglesias-Caballero; S. Pozo; S. Varona; SERGIO; V. Camarero; Vázquez-Morón                                                                                                                                                                                                                                                                                                                                                                                                |                                                                                                                                                                                                                                                                                                                                                                               |
| EPI_ISL_5967131                                                                                                                                                                                                                                                                                                                                                                                                                                                                                                                                                                                                                                                                                                                                                                                                                                                                                                                                                                                                                                                                                                                                                                                                                                                                                                                                                                                                                                                                                                                                                                                                                                                                                                                                                                                                                                                                                                                                                                                                                                                                                                                                                                                                                                                                                                                                                                                                                                                                                                                                                                                                                                                                                                                                                                                                                                                                                                                                                                                                                                                                                                                                                                                                                                                                                                                                                                                                                                                                                                                                                                                                                                                                                                                                                                                                                                                                                                                                                                                                                                                                                                                                                                                                                                                                                                                                                                                                                                                                                                                                                                                                                                                                                                                                                                                                                                                                                                                                                                                                                                                                                                                                                                                                                                                                                                                                                                                                                                                                                                                                                                                                                                                                                                                                                                                                                                                                                                                                                                                                                                                                                                                                                                                                                                                                                                                                                                                                                                                                                                                                                                                                                                                                                                                                                                                                                                                                                                                                                                                                                                                                                                                                                                                                                                                                                                                                                                                                                                                                                                                                                                                                                                                                                                                                                                                                                                                                                                                                                                                                                                                                                                                                                                                                                                                                                                                                                                                                                                                                                                                                                                                                                                                                                                                                                                                                                                                                                                                                                                                                                                                                                                                                                                                                                                                                                                                                                                                                                                                                                                                                                                                                                                                                                                                                                                                                                                                                                                                                                                                                                                                                                                                                                                                                                                                                                                                                                                                                                                                                | HOSPITAL DE LA VEGA LORENZO GUIRAO                                                                       | Instituto de Salud Carlos III                                                                   | A. Monzón; F. Casas; I. Jiménez; I. ALVAREZ MELGARES DE AGUILAR; JOAQUIN; M. Sandonis; P. Zaballos; S. Cuesta; S. Iglesias-Caballero; S. Pozo; S. Varona; V. Camarero; Vázquez-Morón                                                                                                                                                                                                                                                                                                                                                                              |                                                                                                                                                                                                                                                                                                                                                                               |
| EPI_ISL_5967136, EPI_ISL_5967137, EPI_ISL_5967138, EPI_ISL_5967139, EPI_ISL_5967139, EPI_ISL_5967278, EPI_ISL_5967279                                                                                                                                                                                                                                                                                                                                                                                                                                                                                                                                                                                                                                                                                                                                                                                                                                                                                                                                                                                                                                                                                                                                                                                                                                                                                                                                                                                                                                                                                                                                                                                                                                                                                                                                                                                                                                                                                                                                                                                                                                                                                                                                                                                                                                                                                                                                                                                                                                                                                                                                                                                                                                                                                                                                                                                                                                                                                                                                                                                                                                                                                                                                                                                                                                                                                                                                                                                                                                                                                                                                                                                                                                                                                                                                                                                                                                                                                                                                                                                                                                                                                                                                                                                                                                                                                                                                                                                                                                                                                                                                                                                                                                                                                                                                                                                                                                                                                                                                                                                                                                                                                                                                                                                                                                                                                                                                                                                                                                                                                                                                                                                                                                                                                                                                                                                                                                                                                                                                                                                                                                                                                                                                                                                                                                                                                                                                                                                                                                                                                                                                                                                                                                                                                                                                                                                                                                                                                                                                                                                                                                                                                                                                                                                                                                                                                                                                                                                                                                                                                                                                                                                                                                                                                                                                                                                                                                                                                                                                                                                                                                                                                                                                                                                                                                                                                                                                                                                                                                                                                                                                                                                                                                                                                                                                                                                                                                                                                                                                                                                                                                                                                                                                                                                                                                                                                                                                                                                                                                                                                                                                                                                                                                                                                                                                                                                                                                                                                                                                                                                                                                                                                                                                                                                                                                                                                                                                                          | HOSPITAL DE SANTA BARBARA                                                                                | Instituto de Salud Carlos III                                                                   | A. Monzón; ALEJANDRA; F. Casas; I. Jiménez; I. ASENJO VILLAMAYOR; Iglesias-Caballero; M. Sandonis; P. Zaballos; S. Camarero; S. Cuesta; S. Iglesias-Caballero; S. Pozo; S. Varona; V. Camarero; V. Vázquez-Morón; Vázquez-Morón                                                                                                                                                                                                                                                                                                                                   |                                                                                                                                                                                                                                                                                                                                                                               |
| EPI_ISL_5967153, EPI_ISL_5967154, EPI_ISL_5967155                                                                                                                                                                                                                                                                                                                                                                                                                                                                                                                                                                                                                                                                                                                                                                                                                                                                                                                                                                                                                                                                                                                                                                                                                                                                                                                                                                                                                                                                                                                                                                                                                                                                                                                                                                                                                                                                                                                                                                                                                                                                                                                                                                                                                                                                                                                                                                                                                                                                                                                                                                                                                                                                                                                                                                                                                                                                                                                                                                                                                                                                                                                                                                                                                                                                                                                                                                                                                                                                                                                                                                                                                                                                                                                                                                                                                                                                                                                                                                                                                                                                                                                                                                                                                                                                                                                                                                                                                                                                                                                                                                                                                                                                                                                                                                                                                                                                                                                                                                                                                                                                                                                                                                                                                                                                                                                                                                                                                                                                                                                                                                                                                                                                                                                                                                                                                                                                                                                                                                                                                                                                                                                                                                                                                                                                                                                                                                                                                                                                                                                                                                                                                                                                                                                                                                                                                                                                                                                                                                                                                                                                                                                                                                                                                                                                                                                                                                                                                                                                                                                                                                                                                                                                                                                                                                                                                                                                                                                                                                                                                                                                                                                                                                                                                                                                                                                                                                                                                                                                                                                                                                                                                                                                                                                                                                                                                                                                                                                                                                                                                                                                                                                                                                                                                                                                                                                                                                                                                                                                                                                                                                                                                                                                                                                                                                                                                                                                                                                                                                                                                                                                                                                                                                                                                                                                                                                                                                                                                              | HOSPITAL GENERAL DE VALDEPEÑAS                                                                           | Instituto de Salud Carlos III                                                                   | A. Monzón; ESTHER; F. Casas; I. Jiménez; I. MANRIQUE GONZALEZ; M. Sandonis; P. Zaballos; S. Cuesta; S. Iglesias-Caballero; S. Pozo; S. Varona; V. Camarero; Vázquez-Morón                                                                                                                                                                                                                                                                                                                                                                                         |                                                                                                                                                                                                                                                                                                                                                                               |
| EPI_ISL_5967192                                                                                                                                                                                                                                                                                                                                                                                                                                                                                                                                                                                                                                                                                                                                                                                                                                                                                                                                                                                                                                                                                                                                                                                                                                                                                                                                                                                                                                                                                                                                                                                                                                                                                                                                                                                                                                                                                                                                                                                                                                                                                                                                                                                                                                                                                                                                                                                                                                                                                                                                                                                                                                                                                                                                                                                                                                                                                                                                                                                                                                                                                                                                                                                                                                                                                                                                                                                                                                                                                                                                                                                                                                                                                                                                                                                                                                                                                                                                                                                                                                                                                                                                                                                                                                                                                                                                                                                                                                                                                                                                                                                                                                                                                                                                                                                                                                                                                                                                                                                                                                                                                                                                                                                                                                                                                                                                                                                                                                                                                                                                                                                                                                                                                                                                                                                                                                                                                                                                                                                                                                                                                                                                                                                                                                                                                                                                                                                                                                                                                                                                                                                                                                                                                                                                                                                                                                                                                                                                                                                                                                                                                                                                                                                                                                                                                                                                                                                                                                                                                                                                                                                                                                                                                                                                                                                                                                                                                                                                                                                                                                                                                                                                                                                                                                                                                                                                                                                                                                                                                                                                                                                                                                                                                                                                                                                                                                                                                                                                                                                                                                                                                                                                                                                                                                                                                                                                                                                                                                                                                                                                                                                                                                                                                                                                                                                                                                                                                                                                                                                                                                                                                                                                                                                                                                                                                                                                                                                                                                                                | HOSPITAL GENERAL LA MANCHA                                                                               | Instituto de Salud Carlos III                                                                   | A. Monzón; F. Casas; I. GAITAN PITERA; I. Jiménez; JORGE; M. Camarero; P. Zaballos; S. Cuesta; S. Iglesias-Caballero; S. Pozo; S. Varona; Sandonis; V. Vázquez-Morón                                                                                                                                                                                                                                                                                                                                                                                              |                                                                                                                                                                                                                                                                                                                                                                               |











|                                                                                                                                                                                                                                                                                                                                                                                                                                                                                                                                                                                                                                                                                                                                                                                                                                                                                                                                                                                                                                                                                                                                                                                                                                                       |                                                                                                                                 |                                                                                                                          |                                                                                                                                                                                                                                                                                                                                                                                                                                                                                                                                                                           |
|-------------------------------------------------------------------------------------------------------------------------------------------------------------------------------------------------------------------------------------------------------------------------------------------------------------------------------------------------------------------------------------------------------------------------------------------------------------------------------------------------------------------------------------------------------------------------------------------------------------------------------------------------------------------------------------------------------------------------------------------------------------------------------------------------------------------------------------------------------------------------------------------------------------------------------------------------------------------------------------------------------------------------------------------------------------------------------------------------------------------------------------------------------------------------------------------------------------------------------------------------------|---------------------------------------------------------------------------------------------------------------------------------|--------------------------------------------------------------------------------------------------------------------------|---------------------------------------------------------------------------------------------------------------------------------------------------------------------------------------------------------------------------------------------------------------------------------------------------------------------------------------------------------------------------------------------------------------------------------------------------------------------------------------------------------------------------------------------------------------------------|
| EPI_ISL_6174386, EPI_ISL_6174388, EPI_ISL_6174389, EPI_ISL_6174391, EPI_ISL_6174392, EPI_ISL_6174394, EPI_ISL_6174396, EPI_ISL_6174400, EPI_ISL_6174402, EPI_ISL_6174404, EPI_ISL_6174406, EPI_ISL_6174407, EPI_ISL_6174410, EPI_ISL_6174413, EPI_ISL_6174414, EPI_ISL_6174431, EPI_ISL_6174432, EPI_ISL_6174437, EPI_ISL_6174443, EPI_ISL_6174446, EPI_ISL_6174448, EPI_ISL_6174458, EPI_ISL_6174461, EPI_ISL_6174462, EPI_ISL_6174464, EPI_ISL_6174465, EPI_ISL_6174466, EPI_ISL_6174468, EPI_ISL_6174469, EPI_ISL_6174470, EPI_ISL_6174471, EPI_ISL_6174472, EPI_ISL_6174473, EPI_ISL_6174474, EPI_ISL_6174476, EPI_ISL_6174477, EPI_ISL_6174479, EPI_ISL_6174480, EPI_ISL_6174481, EPI_ISL_6174482, EPI_ISL_6174483, EPI_ISL_6174484, EPI_ISL_6174485, EPI_ISL_6174486, EPI_ISL_6174487, EPI_ISL_6174488, EPI_ISL_6174489, EPI_ISL_6174490, EPI_ISL_6174491, EPI_ISL_6174492, EPI_ISL_6174493, EPI_ISL_6174494, EPI_ISL_6174495, EPI_ISL_6174496, EPI_ISL_6174497, EPI_ISL_6174498, EPI_ISL_6174499, EPI_ISL_6174500, EPI_ISL_6174501, EPI_ISL_6174502, EPI_ISL_6174503, EPI_ISL_6174509, EPI_ISL_6174510, EPI_ISL_6174545, EPI_ISL_6174553, EPI_ISL_6174601, EPI_ISL_6174609, EPI_ISL_6174622, EPI_ISL_6174624, EPI_ISL_6174655, EPI_ISL_6174680 | Molecular Biology Laboratory, Vidant Medical Center                                                                             | Brody Integrative Genomics Core, East Carolina University                                                                | Changhong Yin; Heather Duncan; John T. Fallon; Kimberley P. Briley; Weihua Huang                                                                                                                                                                                                                                                                                                                                                                                                                                                                                          |
| EPI_ISL_6121792                                                                                                                                                                                                                                                                                                                                                                                                                                                                                                                                                                                                                                                                                                                                                                                                                                                                                                                                                                                                                                                                                                                                                                                                                                       | Molecular Diagnostics laboratory, West Tehran Health Center, Health Deputy of Iran University of Medical Sciences, Tehran, Iran | Genetics Research Center, University of Social Welfare and Rehabilitation Sciences                                       | Anglia Ataei; Babak Shahbaz; Farah Bokharaei-Salim; Hossein Najmabadi.; Kimia Kahrizi; Maryam Beheshtian; Marzieh Mohseni; Seyed Jalal Kiani; Shohreh Azimi; Vahdat Poortahmasebi; Zohreh Fattahi                                                                                                                                                                                                                                                                                                                                                                         |
| EPI_ISL_6437536, EPI_ISL_6575670, EPI_ISL_6575678                                                                                                                                                                                                                                                                                                                                                                                                                                                                                                                                                                                                                                                                                                                                                                                                                                                                                                                                                                                                                                                                                                                                                                                                     | Molecular Virology section, department of infection & immunity, KFSHRC                                                          | Molecular Virology section, department of infection & immunity, KFSHRC                                                   | Ahmed A. Al-Qahtani; Basma M. Alahideb; Fatimah S. Alhamlan; Feda A. Alsuwairi; Maha Al-Abdulkarim; Maysoun S. Mutabagani; Mohamed S. Asiri; Reem S. Almaghrabi Madain S. Alsanana; Sahar I. Althawadi; Sara A. Altamimi                                                                                                                                                                                                                                                                                                                                                  |
| EPI_ISL_6258787, EPI_ISL_6258790, EPI_ISL_6314688                                                                                                                                                                                                                                                                                                                                                                                                                                                                                                                                                                                                                                                                                                                                                                                                                                                                                                                                                                                                                                                                                                                                                                                                     | Molecular diagnostics laboratory, West Tehran Health Center, Health Deputy of Iran University of Medical Sciences, Tehran, Iran | Genetics Research Center, University of Social Welfare and Rehabilitation Sciences                                       | Anglia Ataei; Babak Shahbaz; Farah Bokharaei-Salim; Hossein Najmabadi.; Kimia Kahrizi; Maryam Beheshtian; Marzieh Mohseni; Seyed Jalal Kiani; Shohreh Azimi; Vahdat Poortahmasebi; Zohreh Fattahi                                                                                                                                                                                                                                                                                                                                                                         |
| EPI_ISL_5854545                                                                                                                                                                                                                                                                                                                                                                                                                                                                                                                                                                                                                                                                                                                                                                                                                                                                                                                                                                                                                                                                                                                                                                                                                                       | NB-Hôpital Georges L. Dumont                                                                                                    | New Brunswick - Vitalité Health                                                                                          | Allain E.; Chacko S.; Crapoulet N.; Desnoyers G.; Garceau R.; Lacroix J.; Lyons P.; Shaw W.                                                                                                                                                                                                                                                                                                                                                                                                                                                                               |
| EPI_ISL_5854356, EPI_ISL_5854659, EPI_ISL_5854664, EPI_ISL_6157835, EPI_ISL_6157844, EPI_ISL_6157917                                                                                                                                                                                                                                                                                                                                                                                                                                                                                                                                                                                                                                                                                                                                                                                                                                                                                                                                                                                                                                                                                                                                                  | NB-Hôpital Georges L. Dumont                                                                                                    | New Brunswick - Vitalité Health Network                                                                                  | Allain E.; Chacko S.; Crapoulet N.; Desnoyers G.; Garceau R.; Lacroix J.; Lyons P.; Shaw W.                                                                                                                                                                                                                                                                                                                                                                                                                                                                               |
| EPI_ISL_5884513, EPI_ISL_5884514, EPI_ISL_5884515, EPI_ISL_5884516                                                                                                                                                                                                                                                                                                                                                                                                                                                                                                                                                                                                                                                                                                                                                                                                                                                                                                                                                                                                                                                                                                                                                                                    | Naradhiwas Rajanagarindra Hospital                                                                                              | Division of Genomic Medicine and Innovation support, Department of Medical Sciences, Ministry of Public Health, Thailand | Archawin Rojanawiwat; Jirapha Pakkdee; Natthakul Bunneang; Nuanjun Wichukhinda; Penpitcha Thawong; Pilailuk Akkapaiboon Okada; Pundharika Piboonsiri; Surakameth Mahasirimongkol; Waritta Sawangdee                                                                                                                                                                                                                                                                                                                                                                       |
| EPI_ISL_6105383                                                                                                                                                                                                                                                                                                                                                                                                                                                                                                                                                                                                                                                                                                                                                                                                                                                                                                                                                                                                                                                                                                                                                                                                                                       | National Center of Infectious and Parasitic Diseases                                                                            | National Center of Infectious and Parasitic Diseases                                                                     | Alexiev et al                                                                                                                                                                                                                                                                                                                                                                                                                                                                                                                                                             |
| EPI_ISL_5917908                                                                                                                                                                                                                                                                                                                                                                                                                                                                                                                                                                                                                                                                                                                                                                                                                                                                                                                                                                                                                                                                                                                                                                                                                                       | National Institute For Communicable Diseases Of The National Health Laboratory Service                                          | National Institute for Communicable Diseases of the National Health Laboratory Service                                   | Amoako DG; Bhiman JN; Everatt J; Ismail A; Mahlangu B; Mnguni A; Mohale T; Ntuli N; Scheepers C                                                                                                                                                                                                                                                                                                                                                                                                                                                                           |
| EPI_ISL_5863548, EPI_ISL_5863515, EPI_ISL_5863524, EPI_ISL_5863532, EPI_ISL_5863533, EPI_ISL_5863540, EPI_ISL_5863549                                                                                                                                                                                                                                                                                                                                                                                                                                                                                                                                                                                                                                                                                                                                                                                                                                                                                                                                                                                                                                                                                                                                 | National Virus Reference Laboratory                                                                                             | National Virus Reference Laboratory                                                                                      | Charlene Bennett; Cillian F De Gascun; Gabriel Gonzalez; Guerrino Macori; Jonathan Dean; Michael Carr; Seamus Fanning; Zoe Yandle                                                                                                                                                                                                                                                                                                                                                                                                                                         |
| EPI_ISL_6340186, EPI_ISL_6340187, EPI_ISL_6340242, EPI_ISL_6340249, EPI_ISL_6476045, EPI_ISL_6476047, EPI_ISL_6476048, EPI_ISL_6476054, EPI_ISL_6476055, EPI_ISL_6476129, EPI_ISL_6476131, EPI_ISL_6476132, EPI_ISL_6476138, EPI_ISL_6476139                                                                                                                                                                                                                                                                                                                                                                                                                                                                                                                                                                                                                                                                                                                                                                                                                                                                                                                                                                                                          | Nebraska Public Health Laboratory                                                                                               | NPHL COVID-19 Response Team                                                                                              | NPHL COVID-19 Response Team                                                                                                                                                                                                                                                                                                                                                                                                                                                                                                                                               |
| EPI_ISL_5934882                                                                                                                                                                                                                                                                                                                                                                                                                                                                                                                                                                                                                                                                                                                                                                                                                                                                                                                                                                                                                                                                                                                                                                                                                                       | NordLab Kajaani                                                                                                                 | Expert Microbiology, National Institute for Health and Welfare                                                           | Carita Savolainen-Kopra; Erika Lindh; Haider al-Hello; Jani Halkilaiti; Kirsi Liitsola; Niina Ikonen; Olli Vapaalhti; Pekka Ellonen; Phuoc Truong; Päivi Laurila; Ravi Kant; Sari Hannula; Soile Blomqvist; Teemu Smura                                                                                                                                                                                                                                                                                                                                                   |
| EPI_ISL_5800596, EPI_ISL_5800598, EPI_ISL_5801541, EPI_ISL_5801542, EPI_ISL_5801543                                                                                                                                                                                                                                                                                                                                                                                                                                                                                                                                                                                                                                                                                                                                                                                                                                                                                                                                                                                                                                                                                                                                                                   | Nucleo De Saude Mary Dota De Bauru                                                                                              | Instituto Butantan                                                                                                       | Antonio Jorge Martins; Claudia Renata dos Santos Barros; David Schlesinger; Debora Botequiao Moretti; Dimas Tadeu Covas; Elaine Cristina Marqueze; Elaine Vieira Santos; Evandra Strazza Rodrigues; Heidge Fukumasu; Jayme Augusto de Souza-Neto; José Salvatore Leister Patané; Luiz Alcantara; Luiz Lehmann Coutinho; Maria Carolina Elias; Mauricio Lacerda Nogueira; Rafael dos Santos Bezerra; Raul Machado Neto; Rejane Maria Tommasini Grotto; Ricardo Haddad; Sandra Cocuzzo Sampaio Vessoni; Simone Kashima; Svetoslav Nanev Slavov; Vincent Louis Viala         |
| EPI_ISL_5799802, EPI_ISL_5799804, EPI_ISL_5799805, EPI_ISL_5799806, EPI_ISL_5799807, EPI_ISL_5799809, EPI_ISL_5799810, EPI_ISL_5799811, EPI_ISL_5799812, EPI_ISL_5799813, EPI_ISL_5799814, EPI_ISL_5799816, EPI_ISL_5799866, EPI_ISL_5799903, EPI_ISL_5799908, EPI_ISL_5799911, EPI_ISL_5799933, EPI_ISL_5799941, EPI_ISL_5799959, EPI_ISL_5799964, EPI_ISL_5799974, EPI_ISL_5799984                                                                                                                                                                                                                                                                                                                                                                                                                                                                                                                                                                                                                                                                                                                                                                                                                                                                  | Nucleo De Saude Vila Falcao De Bauru                                                                                            | Instituto Butantan                                                                                                       | Antonio Jorge Martins; Claudia Renata dos Santos Barros; David Schlesinger; Debora Botequiao Moretti; Dimas Tadeu Covas; Elaine Cristina Marqueze; Elaine Vieira Santos; Evandra Strazza Rodrigues; Heidge Fukumasu; Jayme Augusto de Souza-Neto; José Salvatore Leister Patané; Luiz Alcantara; Luiz Lehmann Coutinho; Maria Carolina Elias; Mauricio Lacerda Nogueira; Rafael dos Santos Bezerra; Raul Machado Neto; Rejane Maria Tommasini Grotto; Ricardo Haddad; Sandra Cocuzzo Sampaio Vessoni; Simone Kashima; Svetoslav Nanev Slavov; Vincent Louis Viala         |
| EPI_ISL_5799780, EPI_ISL_5799786, EPI_ISL_5801120, EPI_ISL_5801182, EPI_ISL_5801247                                                                                                                                                                                                                                                                                                                                                                                                                                                                                                                                                                                                                                                                                                                                                                                                                                                                                                                                                                                                                                                                                                                                                                   | Nucleo Saude Ili N Habitacional Presidente Geisel Bauru                                                                         | Instituto Butantan                                                                                                       | Antonio Jorge Martins; Claudia Renata dos Santos Barros; David Schlesinger; Debora Botequiao Moretti; Dimas Tadeu Covas; Elaine Cristina Marqueze; Elaine Vieira Santos; Evandra Strazza Rodrigues; Heidge Fukumasu; Jayme Augusto de Souza-Neto; José Salvatore Leister Patané; Luiz Alcantara; Luiz Lehmann Coutinho; Maria Carolina Elias; Mauricio Lacerda Nogueira; Rafael dos Santos Bezerra; Raul Machado Neto; Rejane Maria Tommasini Grotto; Ricardo Haddad; Sandra Cocuzzo Sampaio Vessoni; Simone Kashima; Svetoslav Nanev Slavov; Vincent Louis Viala         |
| EPI_ISL_6282383, EPI_ISL_6282385, EPI_ISL_6282392, EPI_ISL_6282398, EPI_ISL_6282404, EPI_ISL_6282412, EPI_ISL_6282418, EPI_ISL_6282426, EPI_ISL_6282427, EPI_ISL_6282433, EPI_ISL_6282439, EPI_ISL_6282455, EPI_ISL_6282457, EPI_ISL_6282459, EPI_ISL_6282462, EPI_ISL_6282467, EPI_ISL_6282470, EPI_ISL_6282481, EPI_ISL_6282486, EPI_ISL_6282495, EPI_ISL_6282496, EPI_ISL_6282504, EPI_ISL_6282510, EPI_ISL_6282516, EPI_ISL_6282526, EPI_ISL_6282531, EPI_ISL_6282548, EPI_ISL_6282554, EPI_ISL_6282558, EPI_ISL_6282565, EPI_ISL_6282578, EPI_ISL_6282585, EPI_ISL_6282592, EPI_ISL_6282599, EPI_ISL_6282604, EPI_ISL_6282615, EPI_ISL_6282624, EPI_ISL_6282632, EPI_ISL_6282640, EPI_ISL_6282644, EPI_ISL_6282653, EPI_ISL_6282654, EPI_ISL_6282661, EPI_ISL_6282667, EPI_ISL_6282676, EPI_ISL_6282677, EPI_ISL_6282678, EPI_ISL_6282679, EPI_ISL_6282680, EPI_ISL_6282686, EPI_ISL_6282689, EPI_ISL_6282695, EPI_ISL_6282697, EPI_ISL_6282706, EPI_ISL_6282708, EPI_ISL_6282711, EPI_ISL_6282716, EPI_ISL_6282720, EPI_ISL_6282726, EPI_ISL_6282731, EPI_ISL_6282736, EPI_ISL_6282745, EPI_ISL_6282747, EPI_ISL_6282752, EPI_ISL_6282758, EPI_ISL_6282763, EPI_ISL_6282770                                                                     | Oslo University Hospital, Department of Microbiology                                                                            | Norwegian Institute of Public Health, Department of Virology                                                             | Arvind Yegambaram Meenakshi Sundaram; Cathrine Fladeby; Garcia Llorente Ignacio; Gregor D. Gillflann; Hilde Elishaug; Hilde Vollan; Jon Bråte; Kamilla Heddeland Instefjord; Karoline Braagstad; Kathrine Stene-Johansen; Line Victoria Moen; Lisa Andersen; Mariann Nilsen; Mona Holberg; Petersen; Olav Hungenes; Pedersen Benedikte Nevjen; Pål Marius Bjørnstad; Rasmus Riis Kopperud; Teodora Plamenova Ribarska                                                                                                                                                     |
| EPI_ISL_6368680                                                                                                                                                                                                                                                                                                                                                                                                                                                                                                                                                                                                                                                                                                                                                                                                                                                                                                                                                                                                                                                                                                                                                                                                                                       | Osmania Medical College                                                                                                         | CSIR-Centre for Cellular and Molecular Biology - INSACOG                                                                 | Amreshwar Vodapalli; Ara Sreenivas; Archana Bharadwaj Siva; B Himasri; Divya Tej Sompatti; Jandhyala Sai Krishna; Karthik Bharadwaj Tallapaka; Lamuk Zaveri; Onkar Kulkarni; Payel Mukherjee; Priya Nurkuthy; Rakesh K Mishra; Shreekant Verma; Sofia Banu; Sumedha Avadhula; Tulasi Nagabandi; Valli Nagalakshmi Undamata; Vidhyadhar Methuku                                                                                                                                                                                                                            |
| EPI_ISL_5808905, EPI_ISL_5808978                                                                                                                                                                                                                                                                                                                                                                                                                                                                                                                                                                                                                                                                                                                                                                                                                                                                                                                                                                                                                                                                                                                                                                                                                      | Oxford Viroomics, NDM, University of Oxford; Oxford University Hospitals; Basingstoke and North Hampshire Hospital              | COVID-19 Genomics UK (COG-UK) Consortium                                                                                 | Alex Mobbs; Amy Trebes; Anita Justice; Catrin Moore; Christophe Fraser; David Bonsall; David Buck; Emma Wise; George Macintyre; Jessica Lynch; John Todd; Mariateresa de Cesare; Matilde Mori; Monique Andersson; Nathan Moore; Nick Cortes; Robert Shaw; Stephen Kidd; Tanya Golubchik; Timothy Peto                                                                                                                                                                                                                                                                     |
| EPI_ISL_5885347                                                                                                                                                                                                                                                                                                                                                                                                                                                                                                                                                                                                                                                                                                                                                                                                                                                                                                                                                                                                                                                                                                                                                                                                                                       | POLICLINICA HORTALANDIA                                                                                                         | Instituto Butantan                                                                                                       | Antonio Jorge Martins; Claudia Renata dos Santos Barros; David Schlesinger; Debora Botequiao Moretti; Dimas Tadeu Covas; Elaine Cristina Marqueze; Elaine Vieira Santos; Evandra Strazza Rodrigues; Heidge Fukumasu; Jayme Augusto de Souza-Neto; José Salvatore Leister Patané; Luiz Alcantara; Luiz Lehmann Coutinho; Maria Carolina Elias; Mauricio Lacerda Nogueira; Rafael dos Santos Bezerra; Raul Machado Neto; Rejane Maria Tommasini Grotto; Ricardo Haddad; Sandra Cocuzzo Sampaio Vessoni; Simone Kashima; Svetoslav Nanev Slavov; Vincent Louis Viala         |
| EPI_ISL_5885342                                                                                                                                                                                                                                                                                                                                                                                                                                                                                                                                                                                                                                                                                                                                                                                                                                                                                                                                                                                                                                                                                                                                                                                                                                       | PRONTO SOCORRO DE MONTE ALTO                                                                                                    | Instituto Butantan                                                                                                       | Antonio Jorge Martins; Claudia Renata dos Santos Barros; David Schlesinger; Debora Botequiao Moretti; Dimas Tadeu Covas; Elaine Cristina Marqueze; Elaine Vieira Santos; Evandra Strazza Rodrigues; Heidge Fukumasu; Jayme Augusto de Souza-Neto; José Salvatore Leister Patané; Luiz Alcantara; Luiz Lehmann Coutinho; Maria Carolina Elias; Mauricio Lacerda Nogueira; Rafael dos Santos Bezerra; Raul Machado Neto; Rejane Maria Tommasini Grotto; Ricardo Haddad; Sandra Cocuzzo Sampaio Vessoni; Simone Kashima; Svetoslav Nanev Slavov; Vincent Louis Viala         |
| EPI_ISL_5797598, EPI_ISL_5797599, EPI_ISL_5798570, EPI_ISL_5798843, EPI_ISL_5798905, EPI_ISL_5799032, EPI_ISL_5799048, EPI_ISL_5799123                                                                                                                                                                                                                                                                                                                                                                                                                                                                                                                                                                                                                                                                                                                                                                                                                                                                                                                                                                                                                                                                                                                | Pathogen Genomics Center, National Institute of Infectious Diseases                                                             | Pathogen Genomics Center, National Institute of Infectious Diseases                                                      | Kentaro Itokawa; Makoto Kuroda; Masanori Hashino; Rina Tanaka; Tsuyoshi Sekizuka                                                                                                                                                                                                                                                                                                                                                                                                                                                                                          |
| EPI_ISL_5990483                                                                                                                                                                                                                                                                                                                                                                                                                                                                                                                                                                                                                                                                                                                                                                                                                                                                                                                                                                                                                                                                                                                                                                                                                                       | Pathology, UAB                                                                                                                  | Pathology, UAB                                                                                                           | E.J.; Hendrickson; Leal; Lefkowitz; Moates, D.; R.C.; S.M.; Van Der Pol; W.J.                                                                                                                                                                                                                                                                                                                                                                                                                                                                                             |
| EPI_ISL_6491530, EPI_ISL_6491531                                                                                                                                                                                                                                                                                                                                                                                                                                                                                                                                                                                                                                                                                                                                                                                                                                                                                                                                                                                                                                                                                                                                                                                                                      | Pennsylvania Department of Health Bureau of Laboratories                                                                        | Pennsylvania Department of Health Bureau of Laboratories                                                                 | Dongxiang Xia                                                                                                                                                                                                                                                                                                                                                                                                                                                                                                                                                             |
| EPI_ISL_5801702                                                                                                                                                                                                                                                                                                                                                                                                                                                                                                                                                                                                                                                                                                                                                                                                                                                                                                                                                                                                                                                                                                                                                                                                                                       | Policlinica Alcía Linea Vitti Rejani                                                                                            | Instituto Butantan                                                                                                       | Antonio Jorge Martins; Claudia Renata dos Santos Barros; David Schlesinger; Debora Botequiao Moretti; Dimas Tadeu Covas; Elaine Cristina Marqueze; Elaine Vieira Santos; Evandra Strazza Rodrigues; Heidge Fukumasu; Jayme Augusto de Souza-Neto; José Salvatore Leister Patané; Luiz Alcantara; Luiz Lehmann Coutinho; Maria Carolina Elias; Mauricio Lacerda Nogueira; Rafael dos Santos Bezerra; Raul Machado Neto; Rejane Maria Tommasini Grotto; Ricardo Haddad; Sandra Cocuzzo Sampaio Vessoni; Simone Kashima; Svetoslav Nanev Slavov; Vincent Louis Viala         |
| EPI_ISL_6036589, EPI_ISL_6036594                                                                                                                                                                                                                                                                                                                                                                                                                                                                                                                                                                                                                                                                                                                                                                                                                                                                                                                                                                                                                                                                                                                                                                                                                      | Prapokklao Hospital                                                                                                             | Division of Genomic Medicine and Innovation support, Department of Medical Sciences, Ministry of Public Health, Thailand | Archawin Rojanawiwat; Jirapha Pakkdee; Natthakul Bunneang; Nuanjun Wichukhinda; Penpitcha Thawong; Pilailuk Akkapaiboon Okada; Pundharika Piboonsiri; Surakameth Mahasirimongkol; Waritta Sawangdee                                                                                                                                                                                                                                                                                                                                                                       |
| EPI_ISL_5801820                                                                                                                                                                                                                                                                                                                                                                                                                                                                                                                                                                                                                                                                                                                                                                                                                                                                                                                                                                                                                                                                                                                                                                                                                                       | Pronto Atendimento Da Ponte De Sao Joao                                                                                         | Instituto Butantan                                                                                                       | Antonio Jorge Martins; Claudia Renata dos Santos Barros; David Schlesinger; Debora Botequiao Moretti; Dimas Tadeu Covas; Elaine Cristina Marqueze; Elaine Vieira Santos; Evandra Strazza Rodrigues; Heidge Fukumasu; Jayme Augusto de Souza-Neto; José Salvatore Leister Patané; Luiz Alcantara; Luiz Lehmann Coutinho; Maria Carolina Elias; Mauricio Lacerda Nogueira; Rafael dos Santos Bezerra; Raul Machado Neto; Rejane Maria Tommasini Grotto; Ricardo Haddad; Sandra Cocuzzo Sampaio Vessoni; Simone Kashima; Svetoslav Nanev Slavov; Vincent Louis Viala         |
| EPI_ISL_5801873                                                                                                                                                                                                                                                                                                                                                                                                                                                                                                                                                                                                                                                                                                                                                                                                                                                                                                                                                                                                                                                                                                                                                                                                                                       | Pronto Atendimento Sao Jose                                                                                                     | Instituto Butantan                                                                                                       | Antonio Jorge Martins; Claudia Renata dos Santos Barros; David Schlesinger; Debora Botequiao Moretti; Dimas Tadeu Covas; Elaine Cristina Marqueze; Elaine Vieira Santos; Evandra Strazza Rodrigues; Heidge Fukumasu; Jayme Augusto de Souza-Neto; José Salvatore Leister Patané; Luiz Alcantara; Luiz Lehmann Coutinho; Maria Carolina Elias; Mauricio Lacerda Nogueira; Rafael dos Santos Bezerra; Raul Machado Neto; Rejane Maria Tommasini Grotto; Ricardo Haddad; Sandra Cocuzzo Sampaio Vessoni; Simone Kashima; Svetoslav Nanev Slavov; Vincent Louis Viala         |
| EPI_ISL_5801795, EPI_ISL_5801874                                                                                                                                                                                                                                                                                                                                                                                                                                                                                                                                                                                                                                                                                                                                                                                                                                                                                                                                                                                                                                                                                                                                                                                                                      | Pronto Atendimento Vila Padre Anchietta                                                                                         | Instituto Butantan                                                                                                       | Antonio Jorge Martins; Claudia Renata dos Santos Barros; David Schlesinger; Debora Botequiao Moretti; Dimas Tadeu Covas; Elaine Cristina Marqueze; Elaine Vieira Santos; Evandra Strazza Rodrigues; Heidge Fukumasu; Jayme Augusto de Souza-Neto; José Salvatore Leister Patané; Luiz Alcantara; Luiz Lehmann Coutinho; Maria Carolina Elias; Mauricio Lacerda Nogueira; Rafael dos Santos Bezerra; Raul Machado Neto; Rejane Maria Tommasini Grotto; Ricardo Haddad; Sandra Cocuzzo Sampaio Vessoni; Simone Kashima; Svetoslav Nanev Slavov; Vincent Louis Viala         |
| EPI_ISL_5800532, EPI_ISL_5800533, EPI_ISL_5800534, EPI_ISL_5802242                                                                                                                                                                                                                                                                                                                                                                                                                                                                                                                                                                                                                                                                                                                                                                                                                                                                                                                                                                                                                                                                                                                                                                                    | Psf Parque Emilia                                                                                                               | Instituto Butantan                                                                                                       | Antonio Jorge Martins; Claudia Renata dos Santos Barros; David Schlesinger; Debora Botequiao Moretti; Dimas Tadeu Covas; Elaine Cristina Marqueze; Elaine Vieira Santos; Evandra Strazza Rodrigues; Heidge Fukumasu; Jayme Augusto de Souza-Neto; José Salvatore Leister Patané; Luiz Alcantara; Luiz Lehmann Coutinho; Maria Carolina Elias; Mauricio Lacerda Nogueira; Rafael dos Santos Bezerra; Raul Machado Neto; Rejane Maria Tommasini Grotto; Ricardo Haddad; Sandra Cocuzzo Sampaio Vessoni; Simone Kashima; Svetoslav Nanev Slavov; Vincent Louis Viala         |
| EPI_ISL_6410505                                                                                                                                                                                                                                                                                                                                                                                                                                                                                                                                                                                                                                                                                                                                                                                                                                                                                                                                                                                                                                                                                                                                                                                                                                       | Public Health Laboratory, Minnesota Department of Health                                                                        | University of Minnesota Genomics Center                                                                                  | Corbin Dirx; Daryl M. Gohl; Jaquelyn Kruger-Laber; John Garbe                                                                                                                                                                                                                                                                                                                                                                                                                                                                                                             |
| EPI_ISL_5806727, EPI_ISL_5806729,                                                                                                                                                                                                                                                                                                                                                                                                                                                                                                                                                                                                                                                                                                                                                                                                                                                                                                                                                                                                                                                                                                                                                                                                                     | Quadram Institute Bioscience                                                                                                    | COVID-19 Genomics UK (COG-UK) Consortium                                                                                 | Alexander J Trotter; Alison E. Mather; Alp Aydin; Ana P. Tedim; Anastasia Kolyva; Andrew Bell; Andrew J. Page; Christopher Jeanes; Claire Stuart; Dave J. Baker; Ebenezer Foster-Nyarko; Gemma L. Kay; John Wain; Justin O'Grady; Leonardo de Oliveira Martins; Lewis G. Spurgin; Lindsay Coupland; Lizzie Meadows; Luke Bedford; Maria Diaz; Mark Webber; Martin Lott; Michael Matthews; Muhammed Hasbi; Nabil-Fareed Alkhan; Ngozi Elumogo; Nicholas M. Thomson; Rachael Stanley; Rachel Gilroy; Reenesh Prakash; Rose K Davidson; Samir Dervisevic; Samuel Bloomfield; |



|                                                                                                                                                                                                                                                                                                                                                                                                                                                                                                                                                                                                                                                                                                                                                                                                                                                                                                                                                      |                                                            |                                                                                                                                          |                                                                                                                                                                                                                                                                                                                                                                                                                                                                                                                                                                   |                                                                                                                                                                                                                                                                                                                                                                                                                                                                        |
|------------------------------------------------------------------------------------------------------------------------------------------------------------------------------------------------------------------------------------------------------------------------------------------------------------------------------------------------------------------------------------------------------------------------------------------------------------------------------------------------------------------------------------------------------------------------------------------------------------------------------------------------------------------------------------------------------------------------------------------------------------------------------------------------------------------------------------------------------------------------------------------------------------------------------------------------------|------------------------------------------------------------|------------------------------------------------------------------------------------------------------------------------------------------|-------------------------------------------------------------------------------------------------------------------------------------------------------------------------------------------------------------------------------------------------------------------------------------------------------------------------------------------------------------------------------------------------------------------------------------------------------------------------------------------------------------------------------------------------------------------|------------------------------------------------------------------------------------------------------------------------------------------------------------------------------------------------------------------------------------------------------------------------------------------------------------------------------------------------------------------------------------------------------------------------------------------------------------------------|
| EPI_ISL_6075177                                                                                                                                                                                                                                                                                                                                                                                                                                                                                                                                                                                                                                                                                                                                                                                                                                                                                                                                      | Shizuoka Institute of Environment and Hygiene              | Japan COVID-19 Open Data Consortium                                                                                                      | Atsushi Toyoda; Hiromi Nagaoka; Hiroshi Mori; Ituro Inoue; Katsuyuki Ishigami; Ken Kurokawa; Masanori Arita; Satomi Asano; Shigeki Mitsunaga; Takatomo Fujisawa; Yasuhiro Tanizawa; Yono Arita                                                                                                                                                                                                                                                                                                                                                                    |                                                                                                                                                                                                                                                                                                                                                                                                                                                                        |
| EPI_ISL_6390800, EPI_ISL_6512866, EPI_ISL_6512868, EPI_ISL_6564629, EPI_ISL_6564841, EPI_ISL_6564910, EPI_ISL_6564911, EPI_ISL_6564913, EPI_ISL_6564914, EPI_ISL_6564916, EPI_ISL_6564917, EPI_ISL_6564920, EPI_ISL_6564944, EPI_ISL_6564945, EPI_ISL_6564946, EPI_ISL_6564947, EPI_ISL_6564948, EPI_ISL_6564949, EPI_ISL_6564950, EPI_ISL_6564951, EPI_ISL_6564952, EPI_ISL_6564953, EPI_ISL_6564954                                                                                                                                                                                                                                                                                                                                                                                                                                                                                                                                                | see above                                                  | Spitalul Clinic Cai Ferate Timisoara                                                                                                     | "Stefan cel Mare" University Metagenomics Lab                                                                                                                                                                                                                                                                                                                                                                                                                                                                                                                     | Georghita Puscaselu Roxana; Lobiuc Andrei                                                                                                                                                                                                                                                                                                                                                                                                                              |
| EPI_ISL_6512857, EPI_ISL_6512859, EPI_ISL_6564617, EPI_ISL_6564621, EPI_ISL_6564899, EPI_ISL_6564901, EPI_ISL_6564902, EPI_ISL_6564906, EPI_ISL_6564907, EPI_ISL_6564908, EPI_ISL_6564935, EPI_ISL_6564936, EPI_ISL_6564937, EPI_ISL_6564938, EPI_ISL_6564939, EPI_ISL_6564940, EPI_ISL_6564941, EPI_ISL_6564942, EPI_ISL_6564943                                                                                                                                                                                                                                                                                                                                                                                                                                                                                                                                                                                                                    | see above                                                  | Spitalul Clinic de Boli Infectioase si Tropicale "Dr. Victor Babeș" Timișoara                                                            | "Stefan cel Mare" University Metagenomics Lab                                                                                                                                                                                                                                                                                                                                                                                                                                                                                                                     | Georghita Puscaselu Roxana; Lobiuc Andrei                                                                                                                                                                                                                                                                                                                                                                                                                              |
| EPI_ISL_6390763, EPI_ISL_6390764, EPI_ISL_6390855, EPI_ISL_6436355, EPI_ISL_6436358, EPI_ISL_6436359, EPI_ISL_6436362, EPI_ISL_6436366, EPI_ISL_6436369, EPI_ISL_6564763, EPI_ISL_6564965                                                                                                                                                                                                                                                                                                                                                                                                                                                                                                                                                                                                                                                                                                                                                            | see above                                                  | Spitalul Clinic de Pneumoftiziologie Iasi                                                                                                | "Stefan cel Mare" University Metagenomics Lab                                                                                                                                                                                                                                                                                                                                                                                                                                                                                                                     | Georghita Puscaselu Roxana; Lobiuc Andrei                                                                                                                                                                                                                                                                                                                                                                                                                              |
| EPI_ISL_6333025, EPI_ISL_6357074, EPI_ISL_6436361, EPI_ISL_6564590, EPI_ISL_6564638, EPI_ISL_6564646, EPI_ISL_6564752, EPI_ISL_6564758, EPI_ISL_6564826, EPI_ISL_6564832, EPI_ISL_6564846, EPI_ISL_6564897, EPI_ISL_6564898, EPI_ISL_6564955, EPI_ISL_6564956, EPI_ISL_6564957, EPI_ISL_6564958, EPI_ISL_6564959, EPI_ISL_6564960, EPI_ISL_6564961, EPI_ISL_6564962, EPI_ISL_6564963, EPI_ISL_6564964, EPI_ISL_6564977, EPI_ISL_6564978, EPI_ISL_6564979                                                                                                                                                                                                                                                                                                                                                                                                                                                                                             | see above                                                  | Spitalul Clinic de Urgenta pentru Copii „Louis Turcanu” Timișoara                                                                        | "Stefan cel Mare" University Metagenomics Lab                                                                                                                                                                                                                                                                                                                                                                                                                                                                                                                     | Gheorghita Puscaselu Roxana; Lobiuc Andrei; Puscaselu Roxana                                                                                                                                                                                                                                                                                                                                                                                                           |
| EPI_ISL_6357137, EPI_ISL_6357183                                                                                                                                                                                                                                                                                                                                                                                                                                                                                                                                                                                                                                                                                                                                                                                                                                                                                                                     |                                                            | Spitalul Judetean de Urgenta Mavromati Botosani                                                                                          | "Stefan cel Mare" University Metagenomics Lab                                                                                                                                                                                                                                                                                                                                                                                                                                                                                                                     | Georghita Puscaselu Roxana; Lobiuc Andrei                                                                                                                                                                                                                                                                                                                                                                                                                              |
| EPI_ISL_6135092, EPI_ISL_6135097, EPI_ISL_6135098, EPI_ISL_6135099, EPI_ISL_6135105, EPI_ISL_6135106, EPI_ISL_6135111, EPI_ISL_6135112, EPI_ISL_6135113, EPI_ISL_6135114, EPI_ISL_6135115, EPI_ISL_6135116, EPI_ISL_6135117, EPI_ISL_6135118, EPI_ISL_6135119, EPI_ISL_6135120, EPI_ISL_6135121, EPI_ISL_6135122, EPI_ISL_6135123, EPI_ISL_6135124, EPI_ISL_6135125, EPI_ISL_6135126, EPI_ISL_6135127, EPI_ISL_6135128, EPI_ISL_6135129, EPI_ISL_6135130, EPI_ISL_6135131, EPI_ISL_6135132, EPI_ISL_6135133, EPI_ISL_6135134, EPI_ISL_6135135, EPI_ISL_6135136, EPI_ISL_6135137, EPI_ISL_6135138, EPI_ISL_6135139, EPI_ISL_6135140, EPI_ISL_6135141, EPI_ISL_6135142, EPI_ISL_6135143, EPI_ISL_6135144, EPI_ISL_6135145, EPI_ISL_6135146, EPI_ISL_6135147, EPI_ISL_6135148, EPI_ISL_6135149, EPI_ISL_6135150, EPI_ISL_6135151, EPI_ISL_6135152, EPI_ISL_6135153, EPI_ISL_6135154, EPI_ISL_6135155, EPI_ISL_6135156, EPI_ISL_6135157, EPI_ISL_6179493 | see above                                                  | Swedish national genomic surveillance program of SARS-CoV-2                                                                              | The Public Health Agency of Sweden                                                                                                                                                                                                                                                                                                                                                                                                                                                                                                                                | Alma Brölund; Maria Lind Karlberg; Maximilian Riess; Swedish national genomic surveillance program of SARS-CoV-2                                                                                                                                                                                                                                                                                                                                                       |
| EPI_ISL_6563376, EPI_ISL_6563389, EPI_ISL_6563399, EPI_ISL_6563401, EPI_ISL_6563402, EPI_ISL_6563416, EPI_ISL_6563426, EPI_ISL_6563433, EPI_ISL_6563435, EPI_ISL_6563445, EPI_ISL_6563448                                                                                                                                                                                                                                                                                                                                                                                                                                                                                                                                                                                                                                                                                                                                                            | see above                                                  | Synlab Medilab                                                                                                                           | Karolinska University Hospital                                                                                                                                                                                                                                                                                                                                                                                                                                                                                                                                    | Annelie Bjerkner; Isak Sylvin; Jan Albert; Karolina Innbergs; Lina Guerra Blomqvist; Lynda Eneh; Martin Ekman; Martina Wahlund; Robert Dyrdak; Sandra Broddesson; Tanja Normark; Tobias Allander; Valtteri Wirta; Zhibing Yun                                                                                                                                                                                                                                          |
| EPI_ISL_6253862, EPI_ISL_6253946, EPI_ISL_6253960, EPI_ISL_6253961                                                                                                                                                                                                                                                                                                                                                                                                                                                                                                                                                                                                                                                                                                                                                                                                                                                                                   |                                                            | TGen North                                                                                                                               | TGen North                                                                                                                                                                                                                                                                                                                                                                                                                                                                                                                                                        | "Jolene Bowers; Brett Van Tassel; Chris French; Darrin Lemmer; Dave Engelthaler"; Hayley Yaglom; Heather Centner                                                                                                                                                                                                                                                                                                                                                       |
| EPI_ISL_5887146, EPI_ISL_6491768, EPI_ISL_6582563                                                                                                                                                                                                                                                                                                                                                                                                                                                                                                                                                                                                                                                                                                                                                                                                                                                                                                    |                                                            | TN DOH Lab Services                                                                                                                      | TN DOH Lab Services                                                                                                                                                                                                                                                                                                                                                                                                                                                                                                                                               | Brian Selinsky; Karen Beasley-Maynard                                                                                                                                                                                                                                                                                                                                                                                                                                  |
| EPI_ISL_6253170                                                                                                                                                                                                                                                                                                                                                                                                                                                                                                                                                                                                                                                                                                                                                                                                                                                                                                                                      |                                                            | TPMG Regional Laboratory                                                                                                                 | California Department of Public Health                                                                                                                                                                                                                                                                                                                                                                                                                                                                                                                            | Emily Smith on behalf of CDPH-COVIDNet and UCSF Center for Advanced Technology                                                                                                                                                                                                                                                                                                                                                                                         |
| EPI_ISL_5937310, EPI_ISL_5937311, EPI_ISL_5937312, EPI_ISL_5937313, EPI_ISL_5937314, EPI_ISL_5937315, EPI_ISL_5937317, EPI_ISL_5937318, EPI_ISL_5937319, EPI_ISL_5937320, EPI_ISL_5937321, EPI_ISL_6011980                                                                                                                                                                                                                                                                                                                                                                                                                                                                                                                                                                                                                                                                                                                                           | see above                                                  | Temporary Specimen Collection Centre at the AsiaWorld-Expo                                                                               | Hong Kong Department of Health                                                                                                                                                                                                                                                                                                                                                                                                                                                                                                                                    | Alan K.L. Tsang; Edman T.K. Lam; Ken H.L. Ng; Peter C.W. Yip; Rickjason C.W. Chan                                                                                                                                                                                                                                                                                                                                                                                      |
| EPI_ISL_5937721, EPI_ISL_5937723, EPI_ISL_5937724, EPI_ISL_5937725, EPI_ISL_5937726, EPI_ISL_5937727, EPI_ISL_5937728                                                                                                                                                                                                                                                                                                                                                                                                                                                                                                                                                                                                                                                                                                                                                                                                                                | see above                                                  | Thai Red Cross Emerging Infectious Diseases Health Science Centre, Chulalongkorn Hospital, Faculty of Medicine, Chulalongkorn University | Thai Red Cross Emerging Infectious Diseases Center and Faculty of Medicine, Chulalongkorn University                                                                                                                                                                                                                                                                                                                                                                                                                                                              | Chanida Ruchrisrisard; Kanthita Worachotsueptrakun; Pasin Hemachudha; Piyanan Prueksapanich; Sinitat Petcharar; Teerada Ponpinit; Thirawat Hemachudha; Thirawat Supharpariyakorn; Weenassarin Ampoot; Yuthana Jojjinda                                                                                                                                                                                                                                                 |
| EPI_ISL_6268439, EPI_ISL_6268440, EPI_ISL_6268449, EPI_ISL_6268450, EPI_ISL_6268451, EPI_ISL_6268452, EPI_ISL_6268453, EPI_ISL_6268454                                                                                                                                                                                                                                                                                                                                                                                                                                                                                                                                                                                                                                                                                                                                                                                                               | see above                                                  | Tokyo Metropolitan Institute of Public Health                                                                                            | Tokyo Metropolitan Institute of Public Health                                                                                                                                                                                                                                                                                                                                                                                                                                                                                                                     | Hirofumi Miyake; Jun Suzuki; Kenji Sadamasu; Mami Nagashima; Masaki Hayashi; Takako Yamazaki; Takushi Fujiwara; Tomoki Igarashi; Yoshihiro Ohsawa; Yumi Ooba                                                                                                                                                                                                                                                                                                           |
| EPI_ISL_6565194, EPI_ISL_6565200                                                                                                                                                                                                                                                                                                                                                                                                                                                                                                                                                                                                                                                                                                                                                                                                                                                                                                                     |                                                            | Tropical Medicine Diagnostic Reference Laboratory, Faculty of Tropical Medicine, Mahidol University                                      | Center for Medical Genomics Ramathibodi Hospital                                                                                                                                                                                                                                                                                                                                                                                                                                                                                                                  | Akanitt Jittmittraphap; Amporn Rungruengkittkun; Insee Sensors; Inthuorn Ratchatsethakul; Jetsumon Sattabongkot Prachumsri; Kesinee Chotiwanich; Nantarat Chantawat; Narin Thippornchai; Parsakorn Tapaopong; Pichamon Sittikul; Pimolpachr Sribrurin; Poramate Jiaranai; Pornsawan Leaugwutiwong; Surachet Benjathummarak; Tanaya Sripoon; Vichapon Tiacharoen; Viravarn Lvura; Wang Nguitragool; Wasun Chantratita; Weena Janwitthayanan; Weearpong Phumratanaprapin |
| EPI_ISL_5977772, EPI_ISL_5977775, EPI_ISL_5978029, EPI_ISL_5978048, EPI_ISL_5978049, EPI_ISL_5978053, EPI_ISL_5978061, EPI_ISL_5978063, EPI_ISL_5978070                                                                                                                                                                                                                                                                                                                                                                                                                                                                                                                                                                                                                                                                                                                                                                                              | see above                                                  | UC Davis Genome Center                                                                                                                   | UC Davis Genome Center                                                                                                                                                                                                                                                                                                                                                                                                                                                                                                                                            | Healthy Davis Together; UC Davis                                                                                                                                                                                                                                                                                                                                                                                                                                       |
| EPI_ISL_6326628, EPI_ISL_6326630                                                                                                                                                                                                                                                                                                                                                                                                                                                                                                                                                                                                                                                                                                                                                                                                                                                                                                                     |                                                            | UCLA Clinical Micro Lab                                                                                                                  | Los Angeles County Public Health Laboratories                                                                                                                                                                                                                                                                                                                                                                                                                                                                                                                     | P. Hemarajata et al.                                                                                                                                                                                                                                                                                                                                                                                                                                                   |
| EPI_ISL_5885350                                                                                                                                                                                                                                                                                                                                                                                                                                                                                                                                                                                                                                                                                                                                                                                                                                                                                                                                      | UNIDADE DE PRONTO ATENDIMENTO CENTRAL DE CARAGUATATUBA     | Instituto Butantan                                                                                                                       | Antonio Jorge Martins; Claudia Renata dos Santos Barros; David Schlesinger; Debora Botequiu Moretti; Dimas Tadeu Covas; Elaine Cristina Marqueze; Elaine Vieira Santos; Evandra Strazza Rodrigues; Heidge Fukumasu; Jayme Augusto de Souza-Neto; José Salvatore Leister Patané; Luiz Alcântara; Luiz Lehmann Coutinho; Maria Carolina Elias; Maurício Lacerda Nogueira; Rafael dos Santos Bezerra; Raul Machado Neto; Rejane Maria Tommasini Grotto; Ricardo Haddad; Sandra Coccuzzo Sampaio Vessoni; Simone Kashima; Svetoslav Nanev Slavov; Vincent Louis Viala |                                                                                                                                                                                                                                                                                                                                                                                                                                                                        |
| EPI_ISL_5885348                                                                                                                                                                                                                                                                                                                                                                                                                                                                                                                                                                                                                                                                                                                                                                                                                                                                                                                                      | UNIDADE DE PRONTO ATENDIMENTO UPA SUL CARAGUATATUBA        | Instituto Butantan                                                                                                                       | Antonio Jorge Martins; Claudia Renata dos Santos Barros; David Schlesinger; Debora Botequiu Moretti; Dimas Tadeu Covas; Elaine Cristina Marqueze; Elaine Vieira Santos; Evandra Strazza Rodrigues; Heidge Fukumasu; Jayme Augusto de Souza-Neto; José Salvatore Leister Patané; Luiz Alcântara; Luiz Lehmann Coutinho; Maria Carolina Elias; Maurício Lacerda Nogueira; Rafael dos Santos Bezerra; Raul Machado Neto; Rejane Maria Tommasini Grotto; Ricardo Haddad; Sandra Coccuzzo Sampaio Vessoni; Simone Kashima; Svetoslav Nanev Slavov; Vincent Louis Viala |                                                                                                                                                                                                                                                                                                                                                                                                                                                                        |
| EPI_ISL_5885349                                                                                                                                                                                                                                                                                                                                                                                                                                                                                                                                                                                                                                                                                                                                                                                                                                                                                                                                      | UNIDADE RESPIRATORIA NOVA HORTOLANDIA                      | Instituto Butantan                                                                                                                       | Antonio Jorge Martins; Claudia Renata dos Santos Barros; David Schlesinger; Debora Botequiu Moretti; Dimas Tadeu Covas; Elaine Cristina Marqueze; Elaine Vieira Santos; Evandra Strazza Rodrigues; Heidge Fukumasu; Jayme Augusto de Souza-Neto; José Salvatore Leister Patané; Luiz Alcântara; Luiz Lehmann Coutinho; Maria Carolina Elias; Maurício Lacerda Nogueira; Rafael dos Santos Bezerra; Raul Machado Neto; Rejane Maria Tommasini Grotto; Ricardo Haddad; Sandra Coccuzzo Sampaio Vessoni; Simone Kashima; Svetoslav Nanev Slavov; Vincent Louis Viala |                                                                                                                                                                                                                                                                                                                                                                                                                                                                        |
| EPI_ISL_5885336                                                                                                                                                                                                                                                                                                                                                                                                                                                                                                                                                                                                                                                                                                                                                                                                                                                                                                                                      | UPA - LUIS ATILIO LOSI VIANA                               | Instituto Butantan                                                                                                                       | Antonio Jorge Martins; Claudia Renata dos Santos Barros; David Schlesinger; Debora Botequiu Moretti; Dimas Tadeu Covas; Elaine Cristina Marqueze; Elaine Vieira Santos; Evandra Strazza Rodrigues; Heidge Fukumasu; Jayme Augusto de Souza-Neto; José Salvatore Leister Patané; Luiz Alcântara; Luiz Lehmann Coutinho; Maria Carolina Elias; Maurício Lacerda Nogueira; Rafael dos Santos Bezerra; Raul Machado Neto; Rejane Maria Tommasini Grotto; Ricardo Haddad; Sandra Coccuzzo Sampaio Vessoni; Simone Kashima; Svetoslav Nanev Slavov; Vincent Louis Viala |                                                                                                                                                                                                                                                                                                                                                                                                                                                                        |
| EPI_ISL_5946187                                                                                                                                                                                                                                                                                                                                                                                                                                                                                                                                                                                                                                                                                                                                                                                                                                                                                                                                      | URMC LABS                                                  | URMC LABS                                                                                                                                | Andrew Cameron; Dwight Hardy; Ghinwa Dumyat; Kelly DeLary; Stepan Voljehn                                                                                                                                                                                                                                                                                                                                                                                                                                                                                         |                                                                                                                                                                                                                                                                                                                                                                                                                                                                        |
| EPI_ISL_5799910                                                                                                                                                                                                                                                                                                                                                                                                                                                                                                                                                                                                                                                                                                                                                                                                                                                                                                                                      | Ubs Dr Helio Migliari                                      | Instituto Butantan                                                                                                                       | Antonio Jorge Martins; Claudia Renata dos Santos Barros; David Schlesinger; Debora Botequiu Moretti; Dimas Tadeu Covas; Elaine Cristina Marqueze; Elaine Vieira Santos; Evandra Strazza Rodrigues; Heidge Fukumasu; Jayme Augusto de Souza-Neto; José Salvatore Leister Patané; Luiz Alcântara; Luiz Lehmann Coutinho; Maria Carolina Elias; Maurício Lacerda Nogueira; Rafael dos Santos Bezerra; Raul Machado Neto; Rejane Maria Tommasini Grotto; Ricardo Haddad; Sandra Coccuzzo Sampaio Vessoni; Simone Kashima; Svetoslav Nanev Slavov; Vincent Louis Viala |                                                                                                                                                                                                                                                                                                                                                                                                                                                                        |
| EPI_ISL_5801559, EPI_ISL_5801560                                                                                                                                                                                                                                                                                                                                                                                                                                                                                                                                                                                                                                                                                                                                                                                                                                                                                                                     | Ubs Glenda Rodella Dumas                                   | Instituto Butantan                                                                                                                       | Antonio Jorge Martins; Claudia Renata dos Santos Barros; David Schlesinger; Debora Botequiu Moretti; Dimas Tadeu Covas; Elaine Cristina Marqueze; Elaine Vieira Santos; Evandra Strazza Rodrigues; Heidge Fukumasu; Jayme Augusto de Souza-Neto; José Salvatore Leister Patané; Luiz Alcântara; Luiz Lehmann Coutinho; Maria Carolina Elias; Maurício Lacerda Nogueira; Rafael dos Santos Bezerra; Raul Machado Neto; Rejane Maria Tommasini Grotto; Ricardo Haddad; Sandra Coccuzzo Sampaio Vessoni; Simone Kashima; Svetoslav Nanev Slavov; Vincent Louis Viala |                                                                                                                                                                                                                                                                                                                                                                                                                                                                        |
| EPI_ISL_5801929                                                                                                                                                                                                                                                                                                                                                                                                                                                                                                                                                                                                                                                                                                                                                                                                                                                                                                                                      | Ubs Helena Marrey                                          | Instituto Butantan                                                                                                                       | Antonio Jorge Martins; Claudia Renata dos Santos Barros; David Schlesinger; Debora Botequiu Moretti; Dimas Tadeu Covas; Elaine Cristina Marqueze; Elaine Vieira Santos; Evandra Strazza Rodrigues; Heidge Fukumasu; Jayme Augusto de Souza-Neto; José Salvatore Leister Patané; Luiz Alcântara; Luiz Lehmann Coutinho; Maria Carolina Elias; Maurício Lacerda Nogueira; Rafael dos Santos Bezerra; Raul Machado Neto; Rejane Maria Tommasini Grotto; Ricardo Haddad; Sandra Coccuzzo Sampaio Vessoni; Simone Kashima; Svetoslav Nanev Slavov; Vincent Louis Viala |                                                                                                                                                                                                                                                                                                                                                                                                                                                                        |
| EPI_ISL_5802373                                                                                                                                                                                                                                                                                                                                                                                                                                                                                                                                                                                                                                                                                                                                                                                                                                                                                                                                      | Ubs Jardim Caiuby                                          | Instituto Butantan                                                                                                                       | Antonio Jorge Martins; Claudia Renata dos Santos Barros; David Schlesinger; Debora Botequiu Moretti; Dimas Tadeu Covas; Elaine Cristina Marqueze; Elaine Vieira Santos; Evandra Strazza Rodrigues; Heidge Fukumasu; Jayme Augusto de Souza-Neto; José Salvatore Leister Patané; Luiz Alcântara; Luiz Lehmann Coutinho; Maria Carolina Elias; Maurício Lacerda Nogueira; Rafael dos Santos Bezerra; Raul Machado Neto; Rejane Maria Tommasini Grotto; Ricardo Haddad; Sandra Coccuzzo Sampaio Vessoni; Simone Kashima; Svetoslav Nanev Slavov; Vincent Louis Viala |                                                                                                                                                                                                                                                                                                                                                                                                                                                                        |
| EPI_ISL_5801181, EPI_ISL_5801186                                                                                                                                                                                                                                                                                                                                                                                                                                                                                                                                                                                                                                                                                                                                                                                                                                                                                                                     | Ubs Jardim Parana                                          | Instituto Butantan                                                                                                                       | Antonio Jorge Martins; Claudia Renata dos Santos Barros; David Schlesinger; Debora Botequiu Moretti; Dimas Tadeu Covas; Elaine Cristina Marqueze; Elaine Vieira Santos; Evandra Strazza Rodrigues; Heidge Fukumasu; Jayme Augusto de Souza-Neto; José Salvatore Leister Patané; Luiz Alcântara; Luiz Lehmann Coutinho; Maria Carolina Elias; Maurício Lacerda Nogueira; Rafael dos Santos Bezerra; Raul Machado Neto; Rejane Maria Tommasini Grotto; Ricardo Haddad; Sandra Coccuzzo Sampaio Vessoni; Simone Kashima; Svetoslav Nanev Slavov; Vincent Louis Viala |                                                                                                                                                                                                                                                                                                                                                                                                                                                                        |
| EPI_ISL_5802035                                                                                                                                                                                                                                                                                                                                                                                                                                                                                                                                                                                                                                                                                                                                                                                                                                                                                                                                      | Unidade De Pronto Atendimento De Ageron De Campos          | Instituto Butantan                                                                                                                       | Antonio Jorge Martins; Claudia Renata dos Santos Barros; David Schlesinger; Debora Botequiu Moretti; Dimas Tadeu Covas; Elaine Cristina Marqueze; Elaine Vieira Santos; Evandra Strazza Rodrigues; Heidge Fukumasu; Jayme Augusto de Souza-Neto; José Salvatore Leister Patané; Luiz Alcântara; Luiz Lehmann Coutinho; Maria Carolina Elias; Maurício Lacerda Nogueira; Rafael dos Santos Bezerra; Raul Machado Neto; Rejane Maria Tommasini Grotto; Ricardo Haddad; Sandra Coccuzzo Sampaio Vessoni; Simone Kashima; Svetoslav Nanev Slavov; Vincent Louis Viala |                                                                                                                                                                                                                                                                                                                                                                                                                                                                        |
| EPI_ISL_5802275, EPI_ISL_5802276, EPI_ISL_5802277                                                                                                                                                                                                                                                                                                                                                                                                                                                                                                                                                                                                                                                                                                                                                                                                                                                                                                    | Unidade De Pronto Atendimento Upa I Santa Isabel           | Instituto Butantan                                                                                                                       | Antonio Jorge Martins; Claudia Renata dos Santos Barros; David Schlesinger; Debora Botequiu Moretti; Dimas Tadeu Covas; Elaine Cristina Marqueze; Elaine Vieira Santos; Evandra Strazza Rodrigues; Heidge Fukumasu; Jayme Augusto de Souza-Neto; José Salvatore Leister Patané; Luiz Alcântara; Luiz Lehmann Coutinho; Maria Carolina Elias; Maurício Lacerda Nogueira; Rafael dos Santos Bezerra; Raul Machado Neto; Rejane Maria Tommasini Grotto; Ricardo Haddad; Sandra Coccuzzo Sampaio Vessoni; Simone Kashima; Svetoslav Nanev Slavov; Vincent Louis Viala |                                                                                                                                                                                                                                                                                                                                                                                                                                                                        |
| EPI_ISL_5802098                                                                                                                                                                                                                                                                                                                                                                                                                                                                                                                                                                                                                                                                                                                                                                                                                                                                                                                                      | Unidade De Pronto Atendimento Upa Sul Caraguatatuba        | Instituto Butantan                                                                                                                       | Antonio Jorge Martins; Claudia Renata dos Santos Barros; David Schlesinger; Debora Botequiu Moretti; Dimas Tadeu Covas; Elaine Cristina Marqueze; Elaine Vieira Santos; Evandra Strazza Rodrigues; Heidge Fukumasu; Jayme Augusto de Souza-Neto; José Salvatore Leister Patané; Luiz Alcântara; Luiz Lehmann Coutinho; Maria Carolina Elias; Maurício Lacerda Nogueira; Rafael dos Santos Bezerra; Raul Machado Neto; Rejane Maria Tommasini Grotto; Ricardo Haddad; Sandra Coccuzzo Sampaio Vessoni; Simone Kashima; Svetoslav Nanev Slavov; Vincent Louis Viala |                                                                                                                                                                                                                                                                                                                                                                                                                                                                        |
| EPI_ISL_5802323                                                                                                                                                                                                                                                                                                                                                                                                                                                                                                                                                                                                                                                                                                                                                                                                                                                                                                                                      | Unidade De Saude Da Familia Jardim America Itaquaquecetuba | Instituto Butantan                                                                                                                       | Antonio Jorge Martins; Claudia Renata dos Santos Barros; David Schlesinger; Debora Botequiu Moretti; Dimas Tadeu Covas; Elaine Cristina Marqueze; Elaine Vieira Santos; Evandra Strazza Rodrigues; Heidge Fukumasu; Jayme Augusto de Souza-Neto; José Salvatore Leister Patané; Luiz Alcântara; Luiz Lehmann Coutinho; Maria Carolina Elias; Maurício Lacerda Nogueira; Rafael dos Santos Bezerra; Raul Machado Neto; Rejane Maria Tommasini Grotto; Ricardo Haddad; Sandra Coccuzzo Sampaio Vessoni; Simone Kashima; Svetoslav Nanev Slavov; Vincent Louis Viala |                                                                                                                                                                                                                                                                                                                                                                                                                                                                        |
| EPI_ISL_5800155                                                                                                                                                                                                                                                                                                                                                                                                                                                                                                                                                                                                                                                                                                                                                                                                                                                                                                                                      | Unidade De Vigilancia Em Saude                             | Instituto Butantan                                                                                                                       | Antonio Jorge Martins; Claudia Renata dos Santos Barros; David Schlesinger; Debora Botequiu Moretti; Dimas Tadeu Covas; Elaine Cristina Marqueze; Elaine Vieira Santos; Evandra Strazza Rodrigues; Heidge Fukumasu; Jayme Augusto de Souza-Neto; José Salvatore Leister Patané; Luiz Alcântara; Luiz Lehmann Coutinho; Maria Carolina Elias; Maurício Lacerda Nogueira; Rafael dos Santos Bezerra; Raul Machado Neto; Rejane Maria Tommasini Grotto; Ricardo Haddad; Sandra Coccuzzo Sampaio Vessoni; Simone Kashima; Svetoslav Nanev Slavov; Vincent Louis Viala |                                                                                                                                                                                                                                                                                                                                                                                                                                                                        |
| EPI_ISL_5799738                                                                                                                                                                                                                                                                                                                                                                                                                                                                                                                                                                                                                                                                                                                                                                                                                                                                                                                                      | Unidade De Vigilancia Epidemiologica                       | Instituto Butantan                                                                                                                       | Antonio Jorge Martins; Claudia Renata dos Santos Barros; David Schlesinger; Debora Botequiu Moretti; Dimas Tadeu Covas; Elaine Cristina Marqueze; Elaine Vieira Santos; Evandra Strazza Rodrigues; Heidge Fukumasu; Jayme Augusto de Souza-Neto; José Salvatore Leister Patané; Luiz Alcântara; Luiz Lehmann Coutinho; Maria Carolina Elias; Maurício Lacerda Nogueira; Rafael dos Santos Bezerra; Raul Machado Neto; Rejane Maria Tommasini Grotto; Ricardo Haddad; Sandra Coccuzzo Sampaio Vessoni; Simone Kashima; Svetoslav Nanev Slavov; Vincent Louis Viala |                                                                                                                                                                                                                                                                                                                                                                                                                                                                        |
| EPI_ISL_5802726                                                                                                                                                                                                                                                                                                                                                                                                                                                                                                                                                                                                                                                                                                                                                                                                                                                                                                                                      | Unidade Mista Osvaldo P Camargo Elias Fausto               | Instituto Butantan                                                                                                                       | Antonio Jorge Martins; Claudia Renata dos Santos Barros; David Schlesinger; Debora Botequiu Moretti; Dimas Tadeu Covas; Elaine Cristina Marqueze; Elaine Vieira Santos; Evandra Strazza Rodrigues; Heidge Fukumasu; Jayme Augusto de Souza-Neto; José Salvatore Leister Patané; Luiz Alcântara; Luiz Lehmann Coutinho; Maria Carolina Elias; Maurício Lacerda Nogueira; Rafael dos Santos Bezerra; Raul Machado Neto; Rejane Maria Tommasini Grotto; Ricardo Haddad; Sandra Coccuzzo Sampaio Vessoni; Simone Kashima; Svetoslav Nanev Slavov; Vincent Louis Viala |                                                                                                                                                                                                                                                                                                                                                                                                                                                                        |
| EPI_ISL_5799839, EPI_ISL_5799847, EPI_ISL_5801809                                                                                                                                                                                                                                                                                                                                                                                                                                                                                                                                                                                                                                                                                                                                                                                                                                                                                                    | Unidade Respiratoria Nova Hortolandia                      | Instituto Butantan                                                                                                                       | Antonio Jorge Martins; Claudia Renata dos Santos Barros; David Schlesinger; Debora Botequiu Moretti; Dimas Tadeu Covas; Elaine Cristina Marqueze; Elaine Vieira Santos; Evandra Strazza Rodrigues; Heidge Fukumasu; Jayme Augusto de Souza-Neto; José Salvatore Leister Patané; Luiz Alcântara; Luiz Lehmann Coutinho; Maria Carolina Elias; Maurício Lacerda Nogueira; Rafael dos Santos Bezerra; Raul Machado Neto; Rejane Maria Tommasini Grotto; Ricardo Haddad; Sandra Coccuzzo Sampaio Vessoni; Simone Kashima; Svetoslav Nanev Slavov; Vincent Louis Viala |                                                                                                                                                                                                                                                                                                                                                                                                                                                                        |

|                                                                                                                                                                                                                                                                                                                                                                                                                                                                                                                                                                                                                                                                                                                                                                                                                                                                                                                                                                                                                                                                                                               |                                                      |                                                                |                                                                                                                                                                                                                                                                                                                                                                                                                                                                                                                                                                   |                                                                                                                                                                                                                                  |
|---------------------------------------------------------------------------------------------------------------------------------------------------------------------------------------------------------------------------------------------------------------------------------------------------------------------------------------------------------------------------------------------------------------------------------------------------------------------------------------------------------------------------------------------------------------------------------------------------------------------------------------------------------------------------------------------------------------------------------------------------------------------------------------------------------------------------------------------------------------------------------------------------------------------------------------------------------------------------------------------------------------------------------------------------------------------------------------------------------------|------------------------------------------------------|----------------------------------------------------------------|-------------------------------------------------------------------------------------------------------------------------------------------------------------------------------------------------------------------------------------------------------------------------------------------------------------------------------------------------------------------------------------------------------------------------------------------------------------------------------------------------------------------------------------------------------------------|----------------------------------------------------------------------------------------------------------------------------------------------------------------------------------------------------------------------------------|
| EPI_ISL_5800275,<br>EPI_ISL_5800510                                                                                                                                                                                                                                                                                                                                                                                                                                                                                                                                                                                                                                                                                                                                                                                                                                                                                                                                                                                                                                                                           | Unidade Sentinela Covid19                            | Instituto Butantan                                             | Antonio Jorge Martins; Claudia Renata dos Santos Barros; David Schlesinger; Debora Botequiu Moretti; Dimas Tadeu Covas; Elaine Cristina Marqueze; Elaine Vieira Santos; Evandra Strazza Rodrigues; Heidge Fukumasu; Jayme Augusto de Souza-Neto; José Salvatore Leister Patané; Luiz Alcantara; Luiz Lehmann Coutinho; Maria Carolina Elias; Maurício Lacerda Nogueira; Rafael dos Santos Bezerra; Raul Machado Neto; Rejane Maria Tommasini Grotto; Ricardo Haddad; Sandra Coccuzzo Sampaio Vessoni; Simone Kashima; Svetoslav Nanev Slavov; Vincent Louis Viala |                                                                                                                                                                                                                                  |
| EPI_ISL_6563369, EPI_ISL_6563373, EPI_ISL_6563374, EPI_ISL_6563375, EPI_ISL_6563379, EPI_ISL_6563381, EPI_ISL_6563384, EPI_ISL_6563385, EPI_ISL_6563386, EPI_ISL_6563387, EPI_ISL_6563388, EPI_ISL_6563393, EPI_ISL_6563398, EPI_ISL_6563403, EPI_ISL_6563405, EPI_ISL_6563406, EPI_ISL_6563407, EPI_ISL_6563413, EPI_ISL_6563415, EPI_ISL_6563418, EPI_ISL_6563421, EPI_ISL_6563422, EPI_ISL_6563428, EPI_ISL_6563430, EPI_ISL_6563431, EPI_ISL_6563436, EPI_ISL_6563437, EPI_ISL_6563438, EPI_ISL_6563439, EPI_ISL_6563441, EPI_ISL_6563444, EPI_ISL_6563446                                                                                                                                                                                                                                                                                                                                                                                                                                                                                                                                                | Unilabs                                              | Karolinska University Hospital                                 | Annelie Bjerkner; Isak Sylvin; Jan Albert; Karolina Ininbergs; Lina Guerra Blomqvist; Lynda Eneh; Martin Ekman; Martina Wahlund; Robert Dyrdak; Sandra Broddesson; Tanja Normark; Tobias Allander; Valterri Wirta; Zhibing Yun                                                                                                                                                                                                                                                                                                                                    |                                                                                                                                                                                                                                  |
| EPI_ISL_6510633, EPI_ISL_6510637, EPI_ISL_6510640, EPI_ISL_6510641, EPI_ISL_6510642, EPI_ISL_6510643, EPI_ISL_6510644                                                                                                                                                                                                                                                                                                                                                                                                                                                                                                                                                                                                                                                                                                                                                                                                                                                                                                                                                                                         | see above                                            | Università degli Studi di Perugia, Perugia, Italy              | Istituto Superiore di Sanità (ISS)                                                                                                                                                                                                                                                                                                                                                                                                                                                                                                                                | Alessandra Lo Presti; Angela Di Martino; Antonella Mencacci; Barbara Camilloni; Luigina Ambrosio; Manuela Marra; Marco Crescenzi; Maria Carollo; Paola Stefanelli                                                                |
| EPI_ISL_5904573, EPI_ISL_5904575, EPI_ISL_5904577, EPI_ISL_5904580, EPI_ISL_5904581, EPI_ISL_5904582, EPI_ISL_5904935, EPI_ISL_5904937, EPI_ISL_5904938, EPI_ISL_5904939, EPI_ISL_5904940, EPI_ISL_5904941, EPI_ISL_5904942, EPI_ISL_5904943                                                                                                                                                                                                                                                                                                                                                                                                                                                                                                                                                                                                                                                                                                                                                                                                                                                                  | see above                                            | Universitätsklinikum Ulm - Institut für Virologie              | Robert Koch Institute                                                                                                                                                                                                                                                                                                                                                                                                                                                                                                                                             |                                                                                                                                                                                                                                  |
| EPI_ISL_5801899                                                                                                                                                                                                                                                                                                                                                                                                                                                                                                                                                                                                                                                                                                                                                                                                                                                                                                                                                                                                                                                                                               | Upa De Bebedouro                                     | Instituto Butantan                                             | Antonio Jorge Martins; Claudia Renata dos Santos Barros; David Schlesinger; Debora Botequiu Moretti; Dimas Tadeu Covas; Elaine Cristina Marqueze; Elaine Vieira Santos; Evandra Strazza Rodrigues; Heidge Fukumasu; Jayme Augusto de Souza-Neto; José Salvatore Leister Patané; Luiz Alcantara; Luiz Lehmann Coutinho; Maria Carolina Elias; Maurício Lacerda Nogueira; Rafael dos Santos Bezerra; Raul Machado Neto; Rejane Maria Tommasini Grotto; Ricardo Haddad; Sandra Coccuzzo Sampaio Vessoni; Simone Kashima; Svetoslav Nanev Slavov; Vincent Louis Viala |                                                                                                                                                                                                                                  |
| EPI_ISL_5800979                                                                                                                                                                                                                                                                                                                                                                                                                                                                                                                                                                                                                                                                                                                                                                                                                                                                                                                                                                                                                                                                                               | Upa Dr Akira Tada                                    | Instituto Butantan                                             | Antonio Jorge Martins; Claudia Renata dos Santos Barros; David Schlesinger; Debora Botequiu Moretti; Dimas Tadeu Covas; Elaine Cristina Marqueze; Elaine Vieira Santos; Evandra Strazza Rodrigues; Heidge Fukumasu; Jayme Augusto de Souza-Neto; José Salvatore Leister Patané; Luiz Alcantara; Luiz Lehmann Coutinho; Maria Carolina Elias; Maurício Lacerda Nogueira; Rafael dos Santos Bezerra; Raul Machado Neto; Rejane Maria Tommasini Grotto; Ricardo Haddad; Sandra Coccuzzo Sampaio Vessoni; Simone Kashima; Svetoslav Nanev Slavov; Vincent Louis Viala |                                                                                                                                                                                                                                  |
| EPI_ISL_5802328, EPI_ISL_5802338                                                                                                                                                                                                                                                                                                                                                                                                                                                                                                                                                                                                                                                                                                                                                                                                                                                                                                                                                                                                                                                                              | Upa Dr Franco Da Rocha                               | Instituto Butantan                                             | Antonio Jorge Martins; Claudia Renata dos Santos Barros; David Schlesinger; Debora Botequiu Moretti; Dimas Tadeu Covas; Elaine Cristina Marqueze; Elaine Vieira Santos; Evandra Strazza Rodrigues; Heidge Fukumasu; Jayme Augusto de Souza-Neto; José Salvatore Leister Patané; Luiz Alcantara; Luiz Lehmann Coutinho; Maria Carolina Elias; Maurício Lacerda Nogueira; Rafael dos Santos Bezerra; Raul Machado Neto; Rejane Maria Tommasini Grotto; Ricardo Haddad; Sandra Coccuzzo Sampaio Vessoni; Simone Kashima; Svetoslav Nanev Slavov; Vincent Louis Viala |                                                                                                                                                                                                                                  |
| EPI_ISL_5801534                                                                                                                                                                                                                                                                                                                                                                                                                                                                                                                                                                                                                                                                                                                                                                                                                                                                                                                                                                                                                                                                                               | Upa Mary Dota                                        | Instituto Butantan                                             | Antonio Jorge Martins; Claudia Renata dos Santos Barros; David Schlesinger; Debora Botequiu Moretti; Dimas Tadeu Covas; Elaine Cristina Marqueze; Elaine Vieira Santos; Evandra Strazza Rodrigues; Heidge Fukumasu; Jayme Augusto de Souza-Neto; José Salvatore Leister Patané; Luiz Alcantara; Luiz Lehmann Coutinho; Maria Carolina Elias; Maurício Lacerda Nogueira; Rafael dos Santos Bezerra; Raul Machado Neto; Rejane Maria Tommasini Grotto; Ricardo Haddad; Sandra Coccuzzo Sampaio Vessoni; Simone Kashima; Svetoslav Nanev Slavov; Vincent Louis Viala |                                                                                                                                                                                                                                  |
| EPI_ISL_5800067, EPI_ISL_5800084                                                                                                                                                                                                                                                                                                                                                                                                                                                                                                                                                                                                                                                                                                                                                                                                                                                                                                                                                                                                                                                                              | Upa Unidade De Pronto Atendimento 24 Horas Bom Jesus | Instituto Butantan                                             | Antonio Jorge Martins; Claudia Renata dos Santos Barros; David Schlesinger; Debora Botequiu Moretti; Dimas Tadeu Covas; Elaine Cristina Marqueze; Elaine Vieira Santos; Evandra Strazza Rodrigues; Heidge Fukumasu; Jayme Augusto de Souza-Neto; José Salvatore Leister Patané; Luiz Alcantara; Luiz Lehmann Coutinho; Maria Carolina Elias; Maurício Lacerda Nogueira; Rafael dos Santos Bezerra; Raul Machado Neto; Rejane Maria Tommasini Grotto; Ricardo Haddad; Sandra Coccuzzo Sampaio Vessoni; Simone Kashima; Svetoslav Nanev Slavov; Vincent Louis Viala |                                                                                                                                                                                                                                  |
| EPI_ISL_5799950                                                                                                                                                                                                                                                                                                                                                                                                                                                                                                                                                                                                                                                                                                                                                                                                                                                                                                                                                                                                                                                                                               | Usafa Guaramar                                       | Instituto Butantan                                             | Antonio Jorge Martins; Claudia Renata dos Santos Barros; David Schlesinger; Debora Botequiu Moretti; Dimas Tadeu Covas; Elaine Cristina Marqueze; Elaine Vieira Santos; Evandra Strazza Rodrigues; Heidge Fukumasu; Jayme Augusto de Souza-Neto; José Salvatore Leister Patané; Luiz Alcantara; Luiz Lehmann Coutinho; Maria Carolina Elias; Maurício Lacerda Nogueira; Rafael dos Santos Bezerra; Raul Machado Neto; Rejane Maria Tommasini Grotto; Ricardo Haddad; Sandra Coccuzzo Sampaio Vessoni; Simone Kashima; Svetoslav Nanev Slavov; Vincent Louis Viala |                                                                                                                                                                                                                                  |
| EPI_ISL_5801053                                                                                                                                                                                                                                                                                                                                                                                                                                                                                                                                                                                                                                                                                                                                                                                                                                                                                                                                                                                                                                                                                               | Vigilancia Em Saude De Fco Morato                    | Instituto Butantan                                             | Antonio Jorge Martins; Claudia Renata dos Santos Barros; David Schlesinger; Debora Botequiu Moretti; Dimas Tadeu Covas; Elaine Cristina Marqueze; Elaine Vieira Santos; Evandra Strazza Rodrigues; Heidge Fukumasu; Jayme Augusto de Souza-Neto; José Salvatore Leister Patané; Luiz Alcantara; Luiz Lehmann Coutinho; Maria Carolina Elias; Maurício Lacerda Nogueira; Rafael dos Santos Bezerra; Raul Machado Neto; Rejane Maria Tommasini Grotto; Ricardo Haddad; Sandra Coccuzzo Sampaio Vessoni; Simone Kashima; Svetoslav Nanev Slavov; Vincent Louis Viala |                                                                                                                                                                                                                                  |
| EPI_ISL_5799961                                                                                                                                                                                                                                                                                                                                                                                                                                                                                                                                                                                                                                                                                                                                                                                                                                                                                                                                                                                                                                                                                               | Vigilancia Em Saude Sae Vigilancia Epidemiologica    | Instituto Butantan                                             | Antonio Jorge Martins; Claudia Renata dos Santos Barros; David Schlesinger; Debora Botequiu Moretti; Dimas Tadeu Covas; Elaine Cristina Marqueze; Elaine Vieira Santos; Evandra Strazza Rodrigues; Heidge Fukumasu; Jayme Augusto de Souza-Neto; José Salvatore Leister Patané; Luiz Alcantara; Luiz Lehmann Coutinho; Maria Carolina Elias; Maurício Lacerda Nogueira; Rafael dos Santos Bezerra; Raul Machado Neto; Rejane Maria Tommasini Grotto; Ricardo Haddad; Sandra Coccuzzo Sampaio Vessoni; Simone Kashima; Svetoslav Nanev Slavov; Vincent Louis Viala |                                                                                                                                                                                                                                  |
| EPI_ISL_5799699                                                                                                                                                                                                                                                                                                                                                                                                                                                                                                                                                                                                                                                                                                                                                                                                                                                                                                                                                                                                                                                                                               | Vigilancia Epidemiologica De Leme                    | Instituto Butantan                                             | Antonio Jorge Martins; Claudia Renata dos Santos Barros; David Schlesinger; Debora Botequiu Moretti; Dimas Tadeu Covas; Elaine Cristina Marqueze; Elaine Vieira Santos; Evandra Strazza Rodrigues; Heidge Fukumasu; Jayme Augusto de Souza-Neto; José Salvatore Leister Patané; Luiz Alcantara; Luiz Lehmann Coutinho; Maria Carolina Elias; Maurício Lacerda Nogueira; Rafael dos Santos Bezerra; Raul Machado Neto; Rejane Maria Tommasini Grotto; Ricardo Haddad; Sandra Coccuzzo Sampaio Vessoni; Simone Kashima; Svetoslav Nanev Slavov; Vincent Louis Viala |                                                                                                                                                                                                                                  |
| EPI_ISL_5802965, EPI_ISL_5802969, EPI_ISL_5802970, EPI_ISL_5803007, EPI_ISL_5803018, EPI_ISL_5803029, EPI_ISL_6000214, EPI_ISL_6227805                                                                                                                                                                                                                                                                                                                                                                                                                                                                                                                                                                                                                                                                                                                                                                                                                                                                                                                                                                        | see above                                            | Virology Unit, Institut Pasteur du Cambodge                    | Virology Unit, Institut Pasteur du Cambodge                                                                                                                                                                                                                                                                                                                                                                                                                                                                                                                       | Cecile Troupin; Chau Darapeak; Chin Savuth; Erik A Karlsson; Jurre Y Siegers; Kraing Sidon; Leakhena Pum; Ly Sovann; Sophoannededh Rath; Veasna Duong; Yi Sengdoeum                                                              |
| EPI_ISL_5934863, EPI_ISL_5934864, EPI_ISL_5934878                                                                                                                                                                                                                                                                                                                                                                                                                                                                                                                                                                                                                                                                                                                                                                                                                                                                                                                                                                                                                                                             | Vita Laboratoriot Oy                                 | Expert Microbiology, National Institute for Health and Welfare | Carita Savolainen-Kopra; Erika Lindh; Haider al-Hello; Jani Halkilähti; Kirsi Liitsola; Niina Ikonen; Olli Vapalahti; Pekka Ellonen; Phuoc Truong; Päivi Laurila; Ravi Kant; Sari Hannula; Soile Blomqvist; Teemu Smura                                                                                                                                                                                                                                                                                                                                           |                                                                                                                                                                                                                                  |
| EPI_ISL_6262427                                                                                                                                                                                                                                                                                                                                                                                                                                                                                                                                                                                                                                                                                                                                                                                                                                                                                                                                                                                                                                                                                               | WVT Laboratory, Corvallis, Oregon                    | OSU Center for Quantitative Life Sciences                      | Oregon State University TRACE Project                                                                                                                                                                                                                                                                                                                                                                                                                                                                                                                             |                                                                                                                                                                                                                                  |
| EPI_ISL_5858127, EPI_ISL_5858163, EPI_ISL_6567280, EPI_ISL_6567281, EPI_ISL_6567285, EPI_ISL_6567306, EPI_ISL_6567307                                                                                                                                                                                                                                                                                                                                                                                                                                                                                                                                                                                                                                                                                                                                                                                                                                                                                                                                                                                         | see above                                            | Weill Cornell Medicine                                         | New York Genome Center                                                                                                                                                                                                                                                                                                                                                                                                                                                                                                                                            | Amy Baldwin; Andre Corvelo; Arryn Crane; Chris Mason; Dayna M. Oschwald; Hanna Rennert; Lars F Westblade; Margaret Elizabeth Ross; Melissa Cushing; Michael Zody; Olivier Elemento; Priya Velu; Samantha Fennessey; Tom Maniatis |
| EPI_ISL_5863362, EPI_ISL_5863363, EPI_ISL_5863364, EPI_ISL_5863365, EPI_ISL_5863366, EPI_ISL_5863367, EPI_ISL_5863368, EPI_ISL_5863369, EPI_ISL_5863370, EPI_ISL_5863371, EPI_ISL_5863372, EPI_ISL_5863373, EPI_ISL_5863374, EPI_ISL_5863375, EPI_ISL_5863376, EPI_ISL_5863377, EPI_ISL_5863378, EPI_ISL_5863379, EPI_ISL_5863380, EPI_ISL_5863381, EPI_ISL_5863382, EPI_ISL_5863383, EPI_ISL_5863384, EPI_ISL_5863385, EPI_ISL_5863386, EPI_ISL_5863387, EPI_ISL_5863388, EPI_ISL_5863389, EPI_ISL_5863390, EPI_ISL_5863391, EPI_ISL_5863392, EPI_ISL_5863393, EPI_ISL_5863394, EPI_ISL_5863395, EPI_ISL_5863396, EPI_ISL_5863397, EPI_ISL_5863398, EPI_ISL_5863399, EPI_ISL_5863400, EPI_ISL_5863401, EPI_ISL_5863402, EPI_ISL_5863403, EPI_ISL_5863404, EPI_ISL_5863405, EPI_ISL_5863406, EPI_ISL_5863407, EPI_ISL_5863408, EPI_ISL_6136221, EPI_ISL_6136222, EPI_ISL_6136223, EPI_ISL_6136224, EPI_ISL_6136225, EPI_ISL_6136226, EPI_ISL_6136227, EPI_ISL_6136228, EPI_ISL_6136229, EPI_ISL_6136230, EPI_ISL_6136231, EPI_ISL_6136232, EPI_ISL_6136233, EPI_ISL_6136234, EPI_ISL_6384778, EPI_ISL_6384785 | see above                                            | unknown                                                        | Nobilis                                                                                                                                                                                                                                                                                                                                                                                                                                                                                                                                                           | Katharine Jennings; Lauren Brinkac; Lee F. Kolakowski; Minh Tran; Shane Mitchell; Shiela Diepold; William M. Nelson                                                                                                              |



We gratefully acknowledge the following Authors from the Originating laboratories responsible for obtaining the specimens, as well as the Submitting laboratories where the genome data were generated and shared via GISAID, on which this research is based.

All Submitters of data may be contacted directly via [www.gisaid.org](http://www.gisaid.org)

Authors are sorted alphabetically.

| Accession ID                                                                                                                                                                                                                                                                                                                                                                                                                                                                                                                                                                                                                                                                                                                                                                                                                                                                                                                                                                                                                                                                                                                                                                                                                                                                                                                                                                                                                                                                                                                                                                                                                                                                                                                     | Originating Laboratory                                                                                                                                                                                                                                                                                                                                                                                                                                                                                                                 | Submitting Laboratory                                                                                                                        | Authors                                                                                                                                                                                                                                                                                                                                                                                                                                                                                                                                                                                                                                                                                                                                                                                                                                                                                                                                                                                                                                                                                                                                                                                                                                 |
|----------------------------------------------------------------------------------------------------------------------------------------------------------------------------------------------------------------------------------------------------------------------------------------------------------------------------------------------------------------------------------------------------------------------------------------------------------------------------------------------------------------------------------------------------------------------------------------------------------------------------------------------------------------------------------------------------------------------------------------------------------------------------------------------------------------------------------------------------------------------------------------------------------------------------------------------------------------------------------------------------------------------------------------------------------------------------------------------------------------------------------------------------------------------------------------------------------------------------------------------------------------------------------------------------------------------------------------------------------------------------------------------------------------------------------------------------------------------------------------------------------------------------------------------------------------------------------------------------------------------------------------------------------------------------------------------------------------------------------|----------------------------------------------------------------------------------------------------------------------------------------------------------------------------------------------------------------------------------------------------------------------------------------------------------------------------------------------------------------------------------------------------------------------------------------------------------------------------------------------------------------------------------------|----------------------------------------------------------------------------------------------------------------------------------------------|-----------------------------------------------------------------------------------------------------------------------------------------------------------------------------------------------------------------------------------------------------------------------------------------------------------------------------------------------------------------------------------------------------------------------------------------------------------------------------------------------------------------------------------------------------------------------------------------------------------------------------------------------------------------------------------------------------------------------------------------------------------------------------------------------------------------------------------------------------------------------------------------------------------------------------------------------------------------------------------------------------------------------------------------------------------------------------------------------------------------------------------------------------------------------------------------------------------------------------------------|
| EPI_ISL_2375948, EPI_ISL_2375994, EPI_ISL_2621099, EPI_ISL_2621100, EPI_ISL_2621103, EPI_ISL_2621136, EPI_ISL_2621144, EPI_ISL_2802148, EPI_ISL_2876958, EPI_ISL_2876982<br>see above                                                                                                                                                                                                                                                                                                                                                                                                                                                                                                                                                                                                                                                                                                                                                                                                                                                                                                                                                                                                                                                                                                                                                                                                                                                                                                                                                                                                                                                                                                                                            | 2 Military Hospital wc MAA                                                                                                                                                                                                                                                                                                                                                                                                                                                                                                             | NHLS/UCT                                                                                                                                     | Arash Iranzadeh; Bruna Galvao; Carolyn Williamson; Deelan Doolabh; Diana Hardie; Gert Marais; Innocent Mudau; Kruger Marais; Lynn Tyers; Marvin Hsiao; Stephen Korsman                                                                                                                                                                                                                                                                                                                                                                                                                                                                                                                                                                                                                                                                                                                                                                                                                                                                                                                                                                                                                                                                  |
| EPI_ISL_2547411, EPI_ISL_2547413, EPI_ISL_2547421, EPI_ISL_2547422                                                                                                                                                                                                                                                                                                                                                                                                                                                                                                                                                                                                                                                                                                                                                                                                                                                                                                                                                                                                                                                                                                                                                                                                                                                                                                                                                                                                                                                                                                                                                                                                                                                               | 2 Military Hospital wc MAA                                                                                                                                                                                                                                                                                                                                                                                                                                                                                                             | National Health Laboratory Service/University of Cape Town (NHLS/UCT)                                                                        | Arash Iranzadeh; Bruna Galvao; Carolyn Williamson; Deelan Doolabh; Diana Hardie; Gert Marais; Innocent Mudau; Lynn Tyers; Marvin Hsiao; Stephen Korsman                                                                                                                                                                                                                                                                                                                                                                                                                                                                                                                                                                                                                                                                                                                                                                                                                                                                                                                                                                                                                                                                                 |
| EPI_ISL_3545522, EPI_ISL_3545532                                                                                                                                                                                                                                                                                                                                                                                                                                                                                                                                                                                                                                                                                                                                                                                                                                                                                                                                                                                                                                                                                                                                                                                                                                                                                                                                                                                                                                                                                                                                                                                                                                                                                                 | 34, Alex. Fleming Str, 16672 Vari, Athens, Greece                                                                                                                                                                                                                                                                                                                                                                                                                                                                                      | Central National Laboratory ,Public Health Organization                                                                                      | A.Katsoulidou et al; G.Spanakos; Kyriaki Tryfinopoulou                                                                                                                                                                                                                                                                                                                                                                                                                                                                                                                                                                                                                                                                                                                                                                                                                                                                                                                                                                                                                                                                                                                                                                                  |
| EPI_ISL_5899302, EPI_ISL_5899310, EPI_ISL_5899314, EPI_ISL_5899407, EPI_ISL_5899672                                                                                                                                                                                                                                                                                                                                                                                                                                                                                                                                                                                                                                                                                                                                                                                                                                                                                                                                                                                                                                                                                                                                                                                                                                                                                                                                                                                                                                                                                                                                                                                                                                              | A. Krumbholz, Labor Dr. Krause und Kollegen MVZ GmbH, Kiel                                                                                                                                                                                                                                                                                                                                                                                                                                                                             | Charité Universitätsmedizin Berlin, Institut für Virologie                                                                                   | Barbara Mühlemann; Christian Drosten; Julia Schneider; Julia Tesch; Jörn Beheim-Schwarzbach; Talitha Veith; Terry Jones; Tobias Bleicker; Victor M Corman                                                                                                                                                                                                                                                                                                                                                                                                                                                                                                                                                                                                                                                                                                                                                                                                                                                                                                                                                                                                                                                                               |
| EPI_ISL_2720399                                                                                                                                                                                                                                                                                                                                                                                                                                                                                                                                                                                                                                                                                                                                                                                                                                                                                                                                                                                                                                                                                                                                                                                                                                                                                                                                                                                                                                                                                                                                                                                                                                                                                                                  | A.S.L. TO4                                                                                                                                                                                                                                                                                                                                                                                                                                                                                                                             | Fondazione del Piemonte per l'Oncologia IRCCS                                                                                                | Antonino Sottile; Giorgio Giardina; Paola Marino; Silvia Brossa                                                                                                                                                                                                                                                                                                                                                                                                                                                                                                                                                                                                                                                                                                                                                                                                                                                                                                                                                                                                                                                                                                                                                                         |
| EPI_ISL_2895114, EPI_ISL_3447712                                                                                                                                                                                                                                                                                                                                                                                                                                                                                                                                                                                                                                                                                                                                                                                                                                                                                                                                                                                                                                                                                                                                                                                                                                                                                                                                                                                                                                                                                                                                                                                                                                                                                                 | ABC Algarve<br>AHRI- Alex Sigal Lab                                                                                                                                                                                                                                                                                                                                                                                                                                                                                                    | Instituto Nacional de Saude (INSA)<br>KRISP, KZN Research Innovation and Sequencing Platform                                                 | Borges et al<br>Alex Sigal; Giandhari Jennifer; Mallory Bernstein; Naidoo Yeshee; Pillay Sureshnee; San E. James; Sandile Cele; Tegally Houriyah; Tshabuila Derek; Wilkinson Eduan; Yajna Ramphal; de Oliveira Tulio                                                                                                                                                                                                                                                                                                                                                                                                                                                                                                                                                                                                                                                                                                                                                                                                                                                                                                                                                                                                                    |
| EPI_ISL_3055356                                                                                                                                                                                                                                                                                                                                                                                                                                                                                                                                                                                                                                                                                                                                                                                                                                                                                                                                                                                                                                                                                                                                                                                                                                                                                                                                                                                                                                                                                                                                                                                                                                                                                                                  | AIID                                                                                                                                                                                                                                                                                                                                                                                                                                                                                                                                   | Irish Coronavirus Sequencing Consortium - National University of Ireland Galway                                                              | Dana Alalwan Alejandro Garcia; Grainne Mc Andrew; Kate Reddington; Patrick Mallon; Riya Negi; Sarah Miles; Simone Coughlan                                                                                                                                                                                                                                                                                                                                                                                                                                                                                                                                                                                                                                                                                                                                                                                                                                                                                                                                                                                                                                                                                                              |
| EPI_ISL_4459417                                                                                                                                                                                                                                                                                                                                                                                                                                                                                                                                                                                                                                                                                                                                                                                                                                                                                                                                                                                                                                                                                                                                                                                                                                                                                                                                                                                                                                                                                                                                                                                                                                                                                                                  | ALABANG MEDICAL CENTER                                                                                                                                                                                                                                                                                                                                                                                                                                                                                                                 | Research Institute for Tropical Medicine/Tohoku University                                                                                   | Allen Anthony Laraño; Ardiane Ysabelle Dolor; Catalino Demetria; Clyde Dapata; Emmanuel Kagning Tsinda; Francisco Gerardo Polotan; Hitoshi Oshitani; Inez Andrea Medado; Jefferson Earl Halog; Lei Lanna Dancel; Leilanie Nacion; Ma. Angelica Tujan; Machiko Okamoto; Maria Carmen Corpuz; Mariko Siato-Obata; Mayuko Saito                                                                                                                                                                                                                                                                                                                                                                                                                                                                                                                                                                                                                                                                                                                                                                                                                                                                                                            |
| EPI_ISL_2493041                                                                                                                                                                                                                                                                                                                                                                                                                                                                                                                                                                                                                                                                                                                                                                                                                                                                                                                                                                                                                                                                                                                                                                                                                                                                                                                                                                                                                                                                                                                                                                                                                                                                                                                  | AMPATH                                                                                                                                                                                                                                                                                                                                                                                                                                                                                                                                 | CERI, Centre for Epidemic Response and Innovation, Stellenbosch University and KRISP, KZN Research Innovation and Sequencing Platform, UKZN. | Emmanuel SJ; Giandhari J; Khan S; Lessells R; Mdlalose K; Naidoo Y; Pillay S; Ramphal U; Tegally H; Wilkinson E; York D; de Oliveira T                                                                                                                                                                                                                                                                                                                                                                                                                                                                                                                                                                                                                                                                                                                                                                                                                                                                                                                                                                                                                                                                                                  |
| EPI_ISL_2501090                                                                                                                                                                                                                                                                                                                                                                                                                                                                                                                                                                                                                                                                                                                                                                                                                                                                                                                                                                                                                                                                                                                                                                                                                                                                                                                                                                                                                                                                                                                                                                                                                                                                                                                  | AMPATH                                                                                                                                                                                                                                                                                                                                                                                                                                                                                                                                 | KRISP, KZN Research Innovation and Sequencing Platform                                                                                       | Emmanuel SJ; Giandhari J; Khan S; Lessells R; Mdlalose K; Naidoo Y; Pillay S; Ramphal U; Sisonke Team; Tegally H; Wilkinson E; York D; de Oliveira T                                                                                                                                                                                                                                                                                                                                                                                                                                                                                                                                                                                                                                                                                                                                                                                                                                                                                                                                                                                                                                                                                    |
| EPI_ISL_5603125                                                                                                                                                                                                                                                                                                                                                                                                                                                                                                                                                                                                                                                                                                                                                                                                                                                                                                                                                                                                                                                                                                                                                                                                                                                                                                                                                                                                                                                                                                                                                                                                                                                                                                                  | AMPATH                                                                                                                                                                                                                                                                                                                                                                                                                                                                                                                                 | National Institute for Communicable Diseases of the National Health Laboratory Service                                                       | Amoako DG; Bhiman JN; Everatt J; Ismail A; Mahlungu B; Mnguni A; Mohale T; Ntuli N; Scheepers C                                                                                                                                                                                                                                                                                                                                                                                                                                                                                                                                                                                                                                                                                                                                                                                                                                                                                                                                                                                                                                                                                                                                         |
| EPI_ISL_3155074, EPI_ISL_4537125, EPI_ISL_4537284                                                                                                                                                                                                                                                                                                                                                                                                                                                                                                                                                                                                                                                                                                                                                                                                                                                                                                                                                                                                                                                                                                                                                                                                                                                                                                                                                                                                                                                                                                                                                                                                                                                                                | ANOUAL<br>APHP Bichat-Claude Bernard                                                                                                                                                                                                                                                                                                                                                                                                                                                                                                   | ANOUAL<br>APHP Bichat-Claude Bernard                                                                                                         | Farah Jouali; Fatima zahra el ansari; Jamal Fekkek.; Mohcine Bennani Mechita; Rachid Benhida; Yassine Kasmi<br>Benoit Visseaux; Samuel Lebourgeois                                                                                                                                                                                                                                                                                                                                                                                                                                                                                                                                                                                                                                                                                                                                                                                                                                                                                                                                                                                                                                                                                      |
| EPI_ISL_3298317                                                                                                                                                                                                                                                                                                                                                                                                                                                                                                                                                                                                                                                                                                                                                                                                                                                                                                                                                                                                                                                                                                                                                                                                                                                                                                                                                                                                                                                                                                                                                                                                                                                                                                                  | AREA DE SALUD LIMON                                                                                                                                                                                                                                                                                                                                                                                                                                                                                                                    | Incienza, Instituto Costarricense de Investigación y Enseñanza en Nutrición y Salud                                                          | Adriana Godínez; Claudio Soto-Garita; Estela Cordero; Francisco Duarte; Hebleen Porras; Joselyn Prado & Karolina Hall; José Luis Vargas; Mariela Gutiérrez; Melany Calderón                                                                                                                                                                                                                                                                                                                                                                                                                                                                                                                                                                                                                                                                                                                                                                                                                                                                                                                                                                                                                                                             |
| EPI_ISL_2658275                                                                                                                                                                                                                                                                                                                                                                                                                                                                                                                                                                                                                                                                                                                                                                                                                                                                                                                                                                                                                                                                                                                                                                                                                                                                                                                                                                                                                                                                                                                                                                                                                                                                                                                  | AREA DE SALUD SAN RAFAEL                                                                                                                                                                                                                                                                                                                                                                                                                                                                                                               | Incienza, Instituto Costarricense de Investigación y Enseñanza en Nutrición y Salud                                                          | Adriana Godínez; Claudio Soto-Garita; Estela Cordero; Francisco Duarte; Hebleen Porras; Joselyn Prado & Javier Zárata-León; José Luis Vargas; Mariela Gutiérrez; Melany Calderón                                                                                                                                                                                                                                                                                                                                                                                                                                                                                                                                                                                                                                                                                                                                                                                                                                                                                                                                                                                                                                                        |
| EPI_ISL_3061204                                                                                                                                                                                                                                                                                                                                                                                                                                                                                                                                                                                                                                                                                                                                                                                                                                                                                                                                                                                                                                                                                                                                                                                                                                                                                                                                                                                                                                                                                                                                                                                                                                                                                                                  | ASST FBF Sacco                                                                                                                                                                                                                                                                                                                                                                                                                                                                                                                         | Laboratory of Clinical Microbiology, Virology and Bioemergencies, ASST Fatebenefratelli Sacco - Sacco Hospital                               | Valeria Micheli                                                                                                                                                                                                                                                                                                                                                                                                                                                                                                                                                                                                                                                                                                                                                                                                                                                                                                                                                                                                                                                                                                                                                                                                                         |
| EPI_ISL_2676706, EPI_ISL_2676708                                                                                                                                                                                                                                                                                                                                                                                                                                                                                                                                                                                                                                                                                                                                                                                                                                                                                                                                                                                                                                                                                                                                                                                                                                                                                                                                                                                                                                                                                                                                                                                                                                                                                                 | ASTRALAB TASSIGNY                                                                                                                                                                                                                                                                                                                                                                                                                                                                                                                      | CNR Virus des Infections Respiratoires - France SUD                                                                                          | Antonin Bal; Bruno Lina; Gregory Destras; Gwendolyne Burfin; Hadrien Regue; Laurence Josset; Martine Valette; Quentin Semanas                                                                                                                                                                                                                                                                                                                                                                                                                                                                                                                                                                                                                                                                                                                                                                                                                                                                                                                                                                                                                                                                                                           |
| EPI_ISL_2638109, EPI_ISL_2963482, EPI_ISL_2963483, EPI_ISL_2963484, EPI_ISL_2963486, EPI_ISL_2963487, EPI_ISL_2963488, EPI_ISL_2963489, EPI_ISL_2963490, EPI_ISL_2963492<br>see above                                                                                                                                                                                                                                                                                                                                                                                                                                                                                                                                                                                                                                                                                                                                                                                                                                                                                                                                                                                                                                                                                                                                                                                                                                                                                                                                                                                                                                                                                                                                            | AULSS 2 Marca Trevigiana                                                                                                                                                                                                                                                                                                                                                                                                                                                                                                               | Istituto Zooprofilattico Sperimentale delle Venzie                                                                                           | Adelaide Milani; Alessia Schivo; Alice Fusaro; Ambra Pastori; Annalisa Salviato; Antonia Ricci; Calogero Terregino; Edoardo Giussani; Elisa Palumbo; Erika Giorgia Quaranta; Isabella Monne; Luca Tassoni                                                                                                                                                                                                                                                                                                                                                                                                                                                                                                                                                                                                                                                                                                                                                                                                                                                                                                                                                                                                                               |
| EPI_ISL_2975230                                                                                                                                                                                                                                                                                                                                                                                                                                                                                                                                                                                                                                                                                                                                                                                                                                                                                                                                                                                                                                                                                                                                                                                                                                                                                                                                                                                                                                                                                                                                                                                                                                                                                                                  | AULSS 6 Euganea                                                                                                                                                                                                                                                                                                                                                                                                                                                                                                                        | Istituto Zooprofilattico Sperimentale delle Venzie                                                                                           | Adelaide Milani; Alessia Schivo; Alice Fusaro; Ambra Pastori; Annalisa Salviato; Antonia Ricci; Calogero Terregino; Edoardo Giussani; Elisa Palumbo; Erika Giorgia Quaranta; Isabella Monne; Luca Tassoni                                                                                                                                                                                                                                                                                                                                                                                                                                                                                                                                                                                                                                                                                                                                                                                                                                                                                                                                                                                                                               |
| EPI_ISL_3382714                                                                                                                                                                                                                                                                                                                                                                                                                                                                                                                                                                                                                                                                                                                                                                                                                                                                                                                                                                                                                                                                                                                                                                                                                                                                                                                                                                                                                                                                                                                                                                                                                                                                                                                  | AX BIO OCEAN                                                                                                                                                                                                                                                                                                                                                                                                                                                                                                                           | CNR Virus des Infections Respiratoires - France SUD                                                                                          | Antonin Bal; Bruno Lina; Gregory Destras; Gwendolyne Burfin; Hadrien Regue; Laurence Josset; Martine Valette; Quentin Semanas                                                                                                                                                                                                                                                                                                                                                                                                                                                                                                                                                                                                                                                                                                                                                                                                                                                                                                                                                                                                                                                                                                           |
| EPI_ISL_2462861, EPI_ISL_2462864, EPI_ISL_2462866, EPI_ISL_2462870                                                                                                                                                                                                                                                                                                                                                                                                                                                                                                                                                                                                                                                                                                                                                                                                                                                                                                                                                                                                                                                                                                                                                                                                                                                                                                                                                                                                                                                                                                                                                                                                                                                               | AZ Sint-Lucas Gent                                                                                                                                                                                                                                                                                                                                                                                                                                                                                                                     | AZ Sint-Lucas Gent                                                                                                                           | Charlotte Verfaille; Elke Vanlaere; Jos Van Acker; Klara De Rauw                                                                                                                                                                                                                                                                                                                                                                                                                                                                                                                                                                                                                                                                                                                                                                                                                                                                                                                                                                                                                                                                                                                                                                        |
| EPI_ISL_2442052                                                                                                                                                                                                                                                                                                                                                                                                                                                                                                                                                                                                                                                                                                                                                                                                                                                                                                                                                                                                                                                                                                                                                                                                                                                                                                                                                                                                                                                                                                                                                                                                                                                                                                                  | AZDelta                                                                                                                                                                                                                                                                                                                                                                                                                                                                                                                                | AZ Delta Medical Laboratories in Roeselare, Belgium                                                                                          | Dieter De Smet; Geert Martens; Merijn Vanhee; on behalf of AZ Delta COVID-19 Genomics core (member of Genomic surveillance of SARS-CoV-2 in Belgium network)                                                                                                                                                                                                                                                                                                                                                                                                                                                                                                                                                                                                                                                                                                                                                                                                                                                                                                                                                                                                                                                                            |
| EPI_ISL_2859321, EPI_ISL_2859333, EPI_ISL_2859339, EPI_ISL_5558848, EPI_ISL_5563175                                                                                                                                                                                                                                                                                                                                                                                                                                                                                                                                                                                                                                                                                                                                                                                                                                                                                                                                                                                                                                                                                                                                                                                                                                                                                                                                                                                                                                                                                                                                                                                                                                              | Adela Serra TY Memorial Center                                                                                                                                                                                                                                                                                                                                                                                                                                                                                                         | Philippine Genome Center                                                                                                                     | Alethea R. de Guzman; Alyssa Joyce E. Telles; Anna Ong-Lim; Arianne A. Zamora; Benedict A. Maralit; Carlo M. Lapid; Celia Carlos; Cynthia P. Saloma; Devon Ray Pacial; Diomedes A. Carino; Diomedes A. Cariño; Edsel Maurice Salvana; Edsel Maurice Salvana; El King D. Morado; Elcid Aaron R. Pangilinan; Eva Maria Cutiongco-de la Paz; Francis A. Tablizo; Henrietta Marie Rodriguez; Jaime C. Montoya; Jan Michael C. Yap; Jarvin E. Nipales; Jo-Hannah S. Llamas; John Michael Egana; John Q. Wong; Joshua Gregor A. Dizon; Joshua Jose Endozo; Juan Antonio R. Magalang; Karol Sophia Apape R. Padilla; Kenneth M. Kim; Kris P. Punsayan; Krisitna Patriz Dela Cruz; Kristina Patriz Dela Cruz; Lindsay Claire D.L. Carandang; Lindsay Clare D.L. Carandang; Ma. Ekamti Planting; Marc Edsel C. Ayes; Maria Rosario Singh-Vergéire; Maria Rosario Singh-Vergéire and Cynthia P. Saloma; Maria Sofia L. Yangzon; Marielle M Gamboa; Marielle M. Gamboa; Marissa Alejandria; Nina Francesca Bustamante; Niña Francesca Bustamante; Razel Nikka M. Hao; Renato Jacinto Q. Mantaring; Rianna Patricia S. Cruz; Sheila Mae M. Araiza; Shiela Mae M. Araiza; Yvonne Valerie Austria; Zipporah Mariebelle R. Enriquez; Zryel V. Mollejon |
| EPI_ISL_2368377, EPI_ISL_2421905, EPI_ISL_2482364, EPI_ISL_2600109, EPI_ISL_2600191, EPI_ISL_2687328, EPI_ISL_4359748, EPI_ISL_4359771, EPI_ISL_4359810, EPI_ISL_4359959, EPI_ISL_4359964, EPI_ISL_4359999, EPI_ISL_4360215, EPI_ISL_4360311, EPI_ISL_4360347, EPI_ISL_4360363, EPI_ISL_4360369, EPI_ISL_4360432, EPI_ISL_4360437, EPI_ISL_4360447, EPI_ISL_4360487, EPI_ISL_4360564, EPI_ISL_4360573, EPI_ISL_4360644, EPI_ISL_4360648, EPI_ISL_4360797, EPI_ISL_4360821, EPI_ISL_4360877, EPI_ISL_4360939, EPI_ISL_4360945, EPI_ISL_4360956, EPI_ISL_4361151, EPI_ISL_4361172, EPI_ISL_4361186, EPI_ISL_4361286, EPI_ISL_4361347, EPI_ISL_4361349, EPI_ISL_4361472, EPI_ISL_4361475, EPI_ISL_4361619, EPI_ISL_4361718, EPI_ISL_4361775, EPI_ISL_4361863, EPI_ISL_4362162, EPI_ISL_4362180, EPI_ISL_4362186, EPI_ISL_4362459, EPI_ISL_4362467, EPI_ISL_4362522, EPI_ISL_4362532, EPI_ISL_4362550, EPI_ISL_4362579, EPI_ISL_4362849, EPI_ISL_4362924, EPI_ISL_4362964, EPI_ISL_4363062, EPI_ISL_4363120, EPI_ISL_4363170, EPI_ISL_4363211, EPI_ISL_4363288, EPI_ISL_4363312, EPI_ISL_4363321, EPI_ISL_4363331, EPI_ISL_4363448, EPI_ISL_4363475, EPI_ISL_4363636, EPI_ISL_4363674, EPI_ISL_4363747, EPI_ISL_4363771, EPI_ISL_4363903, EPI_ISL_4363999, EPI_ISL_4364362, EPI_ISL_4364366, EPI_ISL_4364394, EPI_ISL_4364463, EPI_ISL_4364494, EPI_ISL_4364503, EPI_ISL_4364603, EPI_ISL_4364746, EPI_ISL_4364945, EPI_ISL_4365026, EPI_ISL_4365341, EPI_ISL_4365403, EPI_ISL_4365427, EPI_ISL_4365511, EPI_ISL_4365951, EPI_ISL_4366084, EPI_ISL_4366178, EPI_ISL_4366273, EPI_ISL_4366284, EPI_ISL_4366310, EPI_ISL_4366316, EPI_ISL_4366704, EPI_ISL_4369972, EPI_ISL_4960832, EPI_ISL_4960880, EPI_ISL_4960893, EPI_ISL_4960913 | Adrian Paskey; Alec Vest; Benjamin Rambo-Martin; Christopher Gulvick; Clinton Paden; Clinton R. Paden; Cyndi Clark; Dakota Howard; Darlene Wagner; Dhvani Batra; Dillon Nall; Duncan MacCannell; Erisa Sula; Ethan Sanders; Holly Houdeshell; Jason Caravus; Kara Moser; Kristine Lacek; Matthew Hardison; Matthew Schmerer; Ola Kvalvaag; Patrick Campbell; Peter Cook; Peter W. Cook; Rob Case; Scott Sammons; Shatavia Morrison; Shaun Westlund; Tymeckia Kendall; Victoria Caban Figueroa; Vikramsinha Ghorpade; Yvetta Unoarumhii |                                                                                                                                              |                                                                                                                                                                                                                                                                                                                                                                                                                                                                                                                                                                                                                                                                                                                                                                                                                                                                                                                                                                                                                                                                                                                                                                                                                                         |
| EPI_ISL_2617084, EPI_ISL_2617085, EPI_ISL_2617086                                                                                                                                                                                                                                                                                                                                                                                                                                                                                                                                                                                                                                                                                                                                                                                                                                                                                                                                                                                                                                                                                                                                                                                                                                                                                                                                                                                                                                                                                                                                                                                                                                                                                | Africa_CDC - Malawi P4 S2                                                                                                                                                                                                                                                                                                                                                                                                                                                                                                              | CERI, Centre for Epidemic Response and Innovation, Stellenbosch University and KRISP, KZN Research Innovation and Sequencing Platform, UKZN. | Auld A; Chilima B; Chiwaula M; Emmanuel SJ; Giandhari J; Kaba M; Kampira E; Kasambara W; Kim L; Lessells R; Maida A; Mvula B; Mwangomba W; Naidoo Y; Panja L; Pillay S; Tegally H; Wadonda N; Wilkinson E; de Oliveira T                                                                                                                                                                                                                                                                                                                                                                                                                                                                                                                                                                                                                                                                                                                                                                                                                                                                                                                                                                                                                |
| EPI_ISL_2617087, EPI_ISL_2617088, EPI_ISL_2617089                                                                                                                                                                                                                                                                                                                                                                                                                                                                                                                                                                                                                                                                                                                                                                                                                                                                                                                                                                                                                                                                                                                                                                                                                                                                                                                                                                                                                                                                                                                                                                                                                                                                                | Africa_CDC - Malawi P6 S2                                                                                                                                                                                                                                                                                                                                                                                                                                                                                                              | CERI, Centre for Epidemic Response and Innovation, Stellenbosch University and KRISP, KZN Research Innovation and Sequencing Platform, UKZN. | Auld A; Chilima B; Chiwaula M; Emmanuel SJ; Giandhari J; Kaba M; Kampira E; Kasambara W; Kim L; Lessells R; Maida A; Mvula B; Mwangomba W; Naidoo Y; Panja L; Pillay S; Tegally H; Wadonda N; Wilkinson E; de Oliveira T                                                                                                                                                                                                                                                                                                                                                                                                                                                                                                                                                                                                                                                                                                                                                                                                                                                                                                                                                                                                                |
| EPI_ISL_6510971, EPI_ISL_6511024                                                                                                                                                                                                                                                                                                                                                                                                                                                                                                                                                                                                                                                                                                                                                                                                                                                                                                                                                                                                                                                                                                                                                                                                                                                                                                                                                                                                                                                                                                                                                                                                                                                                                                 | Aga Khan University Hospital                                                                                                                                                                                                                                                                                                                                                                                                                                                                                                           | KEMRI-Wellcome Trust Research Programme,Kilifi                                                                                               | Adam R.Nokes DJ.; Agoti C.; Githinji G.; Lambisia A.Shah R.; Mburu M.W.; Mohamed K.S.; Morobe J.; Ndwiga L. Makori T.; Ochola I.; Ongera E.; Revathi G.; Sayed S.; de Laurent Z.                                                                                                                                                                                                                                                                                                                                                                                                                                                                                                                                                                                                                                                                                                                                                                                                                                                                                                                                                                                                                                                        |
| EPI_ISL_3299244, EPI_ISL_3299245, EPI_ISL_5333834, EPI_ISL_5333880, EPI_ISL_5406507, EPI_ISL_5433558, EPI_ISL_5433564, EPI_ISL_5437193, EPI_ISL_5437194, EPI_ISL_5595420, EPI_ISL_5595453<br>see above                                                                                                                                                                                                                                                                                                                                                                                                                                                                                                                                                                                                                                                                                                                                                                                                                                                                                                                                                                                                                                                                                                                                                                                                                                                                                                                                                                                                                                                                                                                           | Akademiska Sjukhuset, Clinical Microbiology and Hospital Hygiene                                                                                                                                                                                                                                                                                                                                                                                                                                                                       | Akademiska Sjukhuset, Clinical Microbiology and Hospital Hygiene                                                                             | Jonathan Haars; Julia Bergholm; Patrik Ellström; Rene Kaden; Steinar Mannsværk                                                                                                                                                                                                                                                                                                                                                                                                                                                                                                                                                                                                                                                                                                                                                                                                                                                                                                                                                                                                                                                                                                                                                          |

|                                                                                                                                                                                                                                                                                                                                                                                                                                                                                                                                                                                                                                                                                                                                                                                                                                                                                                                                                                                                                                                                                                                                                                                                                                                                                                                                                                                                                                                                                                                                                       |                                                                                                     |                                                                                                                                            |                                                                                                                                                                                                                                                                                                                                                                                                                                                                                                                                                                                                                                                                                                                                                                                                                                                                                                                                                                                           |                                                                                                                                                          |                                                                                                                                                                                 |
|-------------------------------------------------------------------------------------------------------------------------------------------------------------------------------------------------------------------------------------------------------------------------------------------------------------------------------------------------------------------------------------------------------------------------------------------------------------------------------------------------------------------------------------------------------------------------------------------------------------------------------------------------------------------------------------------------------------------------------------------------------------------------------------------------------------------------------------------------------------------------------------------------------------------------------------------------------------------------------------------------------------------------------------------------------------------------------------------------------------------------------------------------------------------------------------------------------------------------------------------------------------------------------------------------------------------------------------------------------------------------------------------------------------------------------------------------------------------------------------------------------------------------------------------------------|-----------------------------------------------------------------------------------------------------|--------------------------------------------------------------------------------------------------------------------------------------------|-------------------------------------------------------------------------------------------------------------------------------------------------------------------------------------------------------------------------------------------------------------------------------------------------------------------------------------------------------------------------------------------------------------------------------------------------------------------------------------------------------------------------------------------------------------------------------------------------------------------------------------------------------------------------------------------------------------------------------------------------------------------------------------------------------------------------------------------------------------------------------------------------------------------------------------------------------------------------------------------|----------------------------------------------------------------------------------------------------------------------------------------------------------|---------------------------------------------------------------------------------------------------------------------------------------------------------------------------------|
| EPI_ISL_3152005                                                                                                                                                                                                                                                                                                                                                                                                                                                                                                                                                                                                                                                                                                                                                                                                                                                                                                                                                                                                                                                                                                                                                                                                                                                                                                                                                                                                                                                                                                                                       | Akershus University Hospital, Department for Microbiology and Infectious Disease Control            | Norwegian Institute of Public Health, Department of Virology                                                                               | Atiya R Ali; Debec Nadia; Engebretsen Serina Beate; Garcia Lorente Ignacio; Hilde Elshaug; Hilde Volla; Jon Bråte; Kamilla Heddeland Instefjord; Karoline Braegstad; Kathrine Stene-Johansen; Line Victoria Moen; Marie Paulsen Madsen; Olav Hungnes; Pedersen Benedikte Nevjen; Rasmus Riis Kopperud                                                                                                                                                                                                                                                                                                                                                                                                                                                                                                                                                                                                                                                                                     |                                                                                                                                                          |                                                                                                                                                                                 |
| EPI_ISL_2467803                                                                                                                                                                                                                                                                                                                                                                                                                                                                                                                                                                                                                                                                                                                                                                                                                                                                                                                                                                                                                                                                                                                                                                                                                                                                                                                                                                                                                                                                                                                                       | Alaska State Virology Laboratory                                                                    | Alaska State Virology Laboratory                                                                                                           | Elva House; Jack Chen; Jacob Zidek; Lisa Smith; Ph.D.; Stephanie DeRonde                                                                                                                                                                                                                                                                                                                                                                                                                                                                                                                                                                                                                                                                                                                                                                                                                                                                                                                  |                                                                                                                                                          |                                                                                                                                                                                 |
| EPI_ISL_3506427                                                                                                                                                                                                                                                                                                                                                                                                                                                                                                                                                                                                                                                                                                                                                                                                                                                                                                                                                                                                                                                                                                                                                                                                                                                                                                                                                                                                                                                                                                                                       | Albertinia Clinic wc AAP                                                                            | NHLS/UCT                                                                                                                                   | Arash Iranzadeh; Bruna Galvao; Carolyn Williamson; Deelan Doolabh; Diana Hardie; Gert Marais; Innocent Mudau; Lynn Tyers; Marvin Hsiao; Rageema Joseph; Stephen Korsman                                                                                                                                                                                                                                                                                                                                                                                                                                                                                                                                                                                                                                                                                                                                                                                                                   |                                                                                                                                                          |                                                                                                                                                                                 |
| EPI_ISL_6010168                                                                                                                                                                                                                                                                                                                                                                                                                                                                                                                                                                                                                                                                                                                                                                                                                                                                                                                                                                                                                                                                                                                                                                                                                                                                                                                                                                                                                                                                                                                                       | Albow Gardens Clinic wc ALB                                                                         | NHLS/UCT                                                                                                                                   | Arash Iranzadeh; Bruna Galvao; Carolyn Williamson; Deelan Doolabh; Diana Hardie; Gert Marais; Innocent Mudau; Lynn Tyers; Marvin Hsiao; Rageema Joseph; Stephen Korsman                                                                                                                                                                                                                                                                                                                                                                                                                                                                                                                                                                                                                                                                                                                                                                                                                   |                                                                                                                                                          |                                                                                                                                                                                 |
| EPI_ISL_2375912, EPI_ISL_2375913                                                                                                                                                                                                                                                                                                                                                                                                                                                                                                                                                                                                                                                                                                                                                                                                                                                                                                                                                                                                                                                                                                                                                                                                                                                                                                                                                                                                                                                                                                                      | Alexander Bay Hospital                                                                              | NHLS/UCT                                                                                                                                   | Arash Iranzadeh; Bruna Galvao; Carolyn Williamson; Deelan Doolabh; Diana Hardie; Innocent Mudau; Kruger Marais; Lynn Tyers; Marvin Hsiao; Stephen Korsman                                                                                                                                                                                                                                                                                                                                                                                                                                                                                                                                                                                                                                                                                                                                                                                                                                 |                                                                                                                                                          |                                                                                                                                                                                 |
| EPI_ISL_3099526, EPI_ISL_3275454                                                                                                                                                                                                                                                                                                                                                                                                                                                                                                                                                                                                                                                                                                                                                                                                                                                                                                                                                                                                                                                                                                                                                                                                                                                                                                                                                                                                                                                                                                                      | Allergy, Immunology and Cell Biology Unit (AICBU)                                                   | Allergy, Immunology and Cell Biology Unit (AICBU)                                                                                          | Ayesha Wijesinghe; Chandima Jeewandara; Deshni Jayathilaka; Dinuka Ariyaratne; Diyanath Ranasinghe; Dumni Gunasinghe; Gathsaurie Neelika Malavige; Tibutius Thanesh                                                                                                                                                                                                                                                                                                                                                                                                                                                                                                                                                                                                                                                                                                                                                                                                                       |                                                                                                                                                          |                                                                                                                                                                                 |
| EPI_ISL_2375992, EPI_ISL_3506439                                                                                                                                                                                                                                                                                                                                                                                                                                                                                                                                                                                                                                                                                                                                                                                                                                                                                                                                                                                                                                                                                                                                                                                                                                                                                                                                                                                                                                                                                                                      | Alma CDC wc AHC                                                                                     | NHLS/UCT                                                                                                                                   | Arash Iranzadeh; Bruna Galvao; Carolyn Williamson; Deelan Doolabh; Diana Hardie; Gert Marais; Innocent Mudau; Kruger Marais; Lynn Tyers; Marvin Hsiao; Rageema Joseph; Sisonke; Stephen Korsman                                                                                                                                                                                                                                                                                                                                                                                                                                                                                                                                                                                                                                                                                                                                                                                           |                                                                                                                                                          |                                                                                                                                                                                 |
| EPI_ISL_5552610, EPI_ISL_5556214                                                                                                                                                                                                                                                                                                                                                                                                                                                                                                                                                                                                                                                                                                                                                                                                                                                                                                                                                                                                                                                                                                                                                                                                                                                                                                                                                                                                                                                                                                                      | Amal Pakpak Medical Center                                                                          | Philippine Genome Center                                                                                                                   | Alethea R. de Guzman; Alyssa Joyce E. Telles; Anna Ong-Lim; Arianne A. Zamora; Benedict A. Maralit; Carlo M. Lapid; Celia Carlos; Cynthia P. Saloma; Devon Ray Pacial; Diomedes A. Cariño; Edsel Maurice Salvana; El King D. Morado; Elcid Aaron R. Pangiliinan; Eva Maria Cutiongco-de la Paz; Francis A. Tablizo; Henrietta Marie Rodriguez; Jaime C. Montoya; Jan Michael C. Yap; Jarvin E. Nipales; Jo-Hannah S. Llames; John Michael Egan; John Q. Wong; Joshua Gregor A. Dizon; Joshua Jose Endozo; Juan Antonio R. Magalang; Karol Sophia Agape R. Padilla; Kris P. Punayan; Kristina Patriz Dela Cruz; Lindsay Clare D.L. Carandang; Ma. Exanil Planting; Marc Edsel C. Ayes; Maria Rosario Singh-Vergeire; Maria Sofia L. Yangzon; Marielle M. Gamboa; Marissa Alejandria; Niña Francisca Bustamante; Razel Nikka M. Hao; Renato Jacinto Q. Mantaring; Rianna Patricia S. Cruz; Shiela Mae M. Araiza; Yvonne Valerie Austria; Zipporah Mariebelle R. Enriquez; Zyrel V. Molljeon |                                                                                                                                                          |                                                                                                                                                                                 |
| EPI_ISL_3504618                                                                                                                                                                                                                                                                                                                                                                                                                                                                                                                                                                                                                                                                                                                                                                                                                                                                                                                                                                                                                                                                                                                                                                                                                                                                                                                                                                                                                                                                                                                                       | Ambry Genetics Corporation                                                                          | Fulgent Genetics                                                                                                                           | Becky Tsai; Benafsh Sapra; Doreen Ng; Harry Gao; James Xie; John Gao; Joseph Fierro; Mickey Li; Yan Meng                                                                                                                                                                                                                                                                                                                                                                                                                                                                                                                                                                                                                                                                                                                                                                                                                                                                                  |                                                                                                                                                          |                                                                                                                                                                                 |
| EPI_ISL_5195365, EPI_ISL_5195381                                                                                                                                                                                                                                                                                                                                                                                                                                                                                                                                                                                                                                                                                                                                                                                                                                                                                                                                                                                                                                                                                                                                                                                                                                                                                                                                                                                                                                                                                                                      | Ampath                                                                                              | NHLS/UCT                                                                                                                                   | Arash Iranzadeh; Bruna Galvao; Carolyn Williamson; Deelan Doolabh; Diana Hardie; Gert Marais; Innocent Mudau; Lynn Tyers; Marvin Hsiao; Rageema Joseph; Stephen Korsman                                                                                                                                                                                                                                                                                                                                                                                                                                                                                                                                                                                                                                                                                                                                                                                                                   |                                                                                                                                                          |                                                                                                                                                                                 |
| EPI_ISL_3243020                                                                                                                                                                                                                                                                                                                                                                                                                                                                                                                                                                                                                                                                                                                                                                                                                                                                                                                                                                                                                                                                                                                                                                                                                                                                                                                                                                                                                                                                                                                                       | Applied DNA Sciences Inc                                                                            | Applied DNA Sciences Inc                                                                                                                   | Huan Dong; Lucas Liu; Spencer William; Yuhua Sun                                                                                                                                                                                                                                                                                                                                                                                                                                                                                                                                                                                                                                                                                                                                                                                                                                                                                                                                          |                                                                                                                                                          |                                                                                                                                                                                 |
| EPI_ISL_2633511, EPI_ISL_3568448, EPI_ISL_3568454, EPI_ISL_3568461                                                                                                                                                                                                                                                                                                                                                                                                                                                                                                                                                                                                                                                                                                                                                                                                                                                                                                                                                                                                                                                                                                                                                                                                                                                                                                                                                                                                                                                                                    | Area of Virology, Serology and Virology Division (SAVID), New South Wales Health Pathology Randwick | Virology Research Laboratory; Area of Virology, Serology and Virology Division (SAVID), New South Wales Health Pathology Randwick          | Au, J.; Bull, R.; Deveson, I.; Foster, C.; Rawlinson, W.; Ruiz Silva, M.; Van Hal, S.                                                                                                                                                                                                                                                                                                                                                                                                                                                                                                                                                                                                                                                                                                                                                                                                                                                                                                     |                                                                                                                                                          |                                                                                                                                                                                 |
| EPI_ISL_2919092, EPI_ISL_3217148                                                                                                                                                                                                                                                                                                                                                                                                                                                                                                                                                                                                                                                                                                                                                                                                                                                                                                                                                                                                                                                                                                                                                                                                                                                                                                                                                                                                                                                                                                                      | Arizona State Public Health Laboratory                                                              | Arizona State Public Health Laboratory                                                                                                     | Jessica Escobar; Katherine Fullerton; Linda Getsinger; Matthew Contursi; Nobuko Fukushima; Stacy White; Trung Huynh; Victor Waddell                                                                                                                                                                                                                                                                                                                                                                                                                                                                                                                                                                                                                                                                                                                                                                                                                                                       |                                                                                                                                                          |                                                                                                                                                                                 |
| EPI_ISL_2484046                                                                                                                                                                                                                                                                                                                                                                                                                                                                                                                                                                                                                                                                                                                                                                                                                                                                                                                                                                                                                                                                                                                                                                                                                                                                                                                                                                                                                                                                                                                                       | Arizona State University                                                                            | Arizona State University                                                                                                                   | Efrem S. Lim; Joshua LaBae; Joy M. Blain; LaRinda A. Holland; Matthew F. Smith; Nicholas J. Mellor; Peter T. Skidmore; Rabia Maqsood; Valerie Harris; Vel Murugan                                                                                                                                                                                                                                                                                                                                                                                                                                                                                                                                                                                                                                                                                                                                                                                                                         |                                                                                                                                                          |                                                                                                                                                                                 |
| EPI_ISL_2464098                                                                                                                                                                                                                                                                                                                                                                                                                                                                                                                                                                                                                                                                                                                                                                                                                                                                                                                                                                                                                                                                                                                                                                                                                                                                                                                                                                                                                                                                                                                                       | Arnies                                                                                              | National Reference Center for Viruses of Respiratory Infections, Institut Pasteur, Paris                                                   | Angela Brisebarre; Camille Capel; Christophe Malabat; Corinne Mauffrais; Etienne Simon-Lorière; Frédéric Lemoine; Louise Lefrancès; Marine Desroches; Marion Barbet; Maud Vanpeenee; Méline Bizard; Sylvie Behillili; Sylvie Van der Werf; Vincent Enouf                                                                                                                                                                                                                                                                                                                                                                                                                                                                                                                                                                                                                                                                                                                                  |                                                                                                                                                          |                                                                                                                                                                                 |
| EPI_ISL_4741447, EPI_ISL_4741477, EPI_ISL_4741522, EPI_ISL_4741523, EPI_ISL_4741545, EPI_ISL_4741594                                                                                                                                                                                                                                                                                                                                                                                                                                                                                                                                                                                                                                                                                                                                                                                                                                                                                                                                                                                                                                                                                                                                                                                                                                                                                                                                                                                                                                                  | Army General Hospital Molecular Laboratory                                                          | Philippine Genome Center                                                                                                                   | Alethea R. de Guzman; Anna Ong-Lim; Arianne A. Zamora; Benedict A. Maralit; Carlo M. Lapid; Celia Carlos; Cynthia P. Saloma; Devon Ray Pacial; Diomedes A. Cariño; Edsel Maurice Salvana; El King D. Morado; Elcid Aaron R. Pangiliinan; Eva Maria Cutiongco-de la Paz; Francis A. Tablizo; Henrietta Marie Rodriguez; Jaime C. Montoya; Jan Michael C. Yap; Jarvin E. Nipales; Jo-Hannah S. Llames; John Q. Wong; Joshua Gregor A. Dizon; Juan Antonio R. Magalang; Karol Sophia Agape R. Padilla; Kenneth M. Kim; Kris P. Punayan; Kristina Patriz Dela Cruz; Lindsay Clare D.L. Carandang; Ma. Exanil Planting; Marc Edsel C. Ayes; Maria Rosario Singh-Vergeire; Maria Sofia L. Yangzon; Marielle M. Gamboa; Marissa Alejandria; Niña Francisca Bustamante; Razel Nikka M. Hao; Renato Jacinto Q. Mantaring; Rianna Patricia S. Cruz; Shiela Mae M. Araiza; Yvonne Valerie Austria; Zipporah Mariebelle R. Enriquez; Zyrel V. Molljeon                                                |                                                                                                                                                          |                                                                                                                                                                                 |
| EPI_ISL_5524594                                                                                                                                                                                                                                                                                                                                                                                                                                                                                                                                                                                                                                                                                                                                                                                                                                                                                                                                                                                                                                                                                                                                                                                                                                                                                                                                                                                                                                                                                                                                       | Askam Clinic                                                                                        | NHLS/UCT                                                                                                                                   | Arash Iranzadeh; Bruna Galvao; Carolyn Williamson; Deelan Doolabh; Diana Hardie; Gert Marais; Innocent Mudau; Lynn Tyers; Marvin Hsiao; Rageema Joseph; Stephen Korsman                                                                                                                                                                                                                                                                                                                                                                                                                                                                                                                                                                                                                                                                                                                                                                                                                   |                                                                                                                                                          |                                                                                                                                                                                 |
| EPI_ISL_2692239, EPI_ISL_2715018                                                                                                                                                                                                                                                                                                                                                                                                                                                                                                                                                                                                                                                                                                                                                                                                                                                                                                                                                                                                                                                                                                                                                                                                                                                                                                                                                                                                                                                                                                                      | Atlas Genomics                                                                                      | Seattle Flu Study                                                                                                                          | Amanda Adler; Barry R. Lutz; Benjamin Pelle; Brian Hiatt; Caitlin R. Wolf; Chris D. Frazar; Deborah A. Nickerson; Elisabeth Brandstetter; Erica Ryke; Geoff Melly; Helen Y. Chu; Janet A. Englund; Jay Shendure; Jover Lee; Kairsten Fay; Kristen Lacombe; Lea M. Starita; Mark J. Rieder; Matthew Richardson; Matthew Thompson; Melissa Truong; Michael Boeckh; Michael Boudreau; Misja Ilicisin; Peter D. Han; Philip Dykema; Romesh Guntong; Scott Lindquist; Thomas R. Sibley; Trevor Bedford                                                                                                                                                                                                                                                                                                                                                                                                                                                                                         |                                                                                                                                                          |                                                                                                                                                                                 |
| EPI_ISL_2616364, EPI_ISL_2985537                                                                                                                                                                                                                                                                                                                                                                                                                                                                                                                                                                                                                                                                                                                                                                                                                                                                                                                                                                                                                                                                                                                                                                                                                                                                                                                                                                                                                                                                                                                      | Austrian Agency for Health and Food Safety (AGES)                                                   | Bergthaler laboratory, CeMM Research Center for Molecular Medicine of the Austrian Academy of Sciences                                     | Andreas Bergthaler; Anna Schedl; Bekir Erguner; Benedikt Agerer; Christoph Bock; Fabian Amman; Jan Laine; Lukas Endler; Maelle Le Moing; Martin Senekowitsch; Matthew Thornton; Michael Schuster; Petr Triska; Thomas Penz                                                                                                                                                                                                                                                                                                                                                                                                                                                                                                                                                                                                                                                                                                                                                                |                                                                                                                                                          |                                                                                                                                                                                 |
| EPI_ISL_2389624                                                                                                                                                                                                                                                                                                                                                                                                                                                                                                                                                                                                                                                                                                                                                                                                                                                                                                                                                                                                                                                                                                                                                                                                                                                                                                                                                                                                                                                                                                                                       | B.J. Medical College and Civil Hospital, Ahmedabad                                                  | Gujarat Biotechnology Research Centre                                                                                                      | Chaitanya Joshi; Dinesh Kumar; Janvi Raval; Madhvi Joshi; Nitesh Shah; Nitin Savaiya; Pranay Shah; Ramesh Pandit; Sonal Sharma; Twinkle Soni; Umang Mishra; Zarna Patel; Zuber Saiyed                                                                                                                                                                                                                                                                                                                                                                                                                                                                                                                                                                                                                                                                                                                                                                                                     |                                                                                                                                                          |                                                                                                                                                                                 |
| EPI_ISL_2893314                                                                                                                                                                                                                                                                                                                                                                                                                                                                                                                                                                                                                                                                                                                                                                                                                                                                                                                                                                                                                                                                                                                                                                                                                                                                                                                                                                                                                                                                                                                                       | BARC - Sisonke                                                                                      | KRISP, KZN Research Innovation and Sequencing Platform                                                                                     | Giandhari Jennifer; Naidoo Yeshnee; Pillay Sureshnee; San James; Sisonke; Tegally Houriiyah; Tshabula Derek; Wilkinson Eduan; Yajna Ramphal; de Oliveira Tulio                                                                                                                                                                                                                                                                                                                                                                                                                                                                                                                                                                                                                                                                                                                                                                                                                            |                                                                                                                                                          |                                                                                                                                                                                 |
| EPI_ISL_2710309, EPI_ISL_2710310, EPI_ISL_2710311, EPI_ISL_2710317, EPI_ISL_2710321                                                                                                                                                                                                                                                                                                                                                                                                                                                                                                                                                                                                                                                                                                                                                                                                                                                                                                                                                                                                                                                                                                                                                                                                                                                                                                                                                                                                                                                                   | BARC / Lancet                                                                                       | KRISP, KZN Research Innovation and Sequencing Platform                                                                                     | Giandhari Jennifer; Naidoo Yeshnee; Pillay Sureshnee; San James; Sisonke; Tegally Houriiyah; Tshabula Derek; Wilkinson Eduan; Yajna Ramphal; de Oliveira Tulio                                                                                                                                                                                                                                                                                                                                                                                                                                                                                                                                                                                                                                                                                                                                                                                                                            |                                                                                                                                                          |                                                                                                                                                                                 |
| EPI_ISL_2497980, EPI_ISL_2498148, EPI_ISL_2498244, EPI_ISL_2498264, EPI_ISL_2498265, EPI_ISL_2498760, EPI_ISL_2498959, EPI_ISL_2499312, EPI_ISL_2499346, EPI_ISL_2499355, EPI_ISL_2499406, EPI_ISL_2499412, EPI_ISL_2499746, EPI_ISL_2499747, EPI_ISL_2522779, EPI_ISL_2522545, EPI_ISL_2522548, EPI_ISL_2522717, EPI_ISL_2523831, EPI_ISL_2523881, EPI_ISL_2523882, EPI_ISL_2523886, EPI_ISL_2524224, EPI_ISL_2524238, EPI_ISL_2524238, EPI_ISL_2524402, EPI_ISL_2524412, EPI_ISL_2524421, EPI_ISL_2524487, EPI_ISL_2524497, EPI_ISL_2524521, EPI_ISL_2524526, EPI_ISL_2524629, EPI_ISL_2524667, EPI_ISL_2525134, EPI_ISL_2525533, EPI_ISL_2525559, EPI_ISL_2525732, EPI_ISL_2525824, EPI_ISL_2525894, EPI_ISL_2526607, EPI_ISL_2527281, EPI_ISL_2527534, EPI_ISL_2528342, EPI_ISL_2530562, EPI_ISL_2531402, EPI_ISL_2531514, EPI_ISL_2531515, EPI_ISL_2531557, EPI_ISL_2531559, EPI_ISL_2531746, EPI_ISL_2531803, EPI_ISL_2532057, EPI_ISL_2532086, EPI_ISL_2532093, EPI_ISL_2532101, EPI_ISL_2532249, EPI_ISL_2653081, EPI_ISL_2653499, EPI_ISL_2653642, EPI_ISL_2653692, EPI_ISL_2653948, EPI_ISL_2654196, EPI_ISL_2654251, EPI_ISL_2654410, EPI_ISL_2654656, EPI_ISL_2654675, EPI_ISL_2654880, EPI_ISL_2654886, EPI_ISL_2655005, EPI_ISL_2655083, EPI_ISL_2656034, EPI_ISL_2656344, EPI_ISL_2656552, EPI_ISL_26567098, EPI_ISL_2656778, EPI_ISL_2656854, EPI_ISL_265718879, EPI_ISL_26571895, EPI_ISL_265719465, EPI_ISL_265719641, EPI_ISL_265720298, EPI_ISL_265720787, EPI_ISL_265720991, EPI_ISL_265721256, EPI_ISL_2721504, EPI_ISL_2721577 | see above                                                                                           | see above                                                                                                                                  | BCCDC Public Health Laboratory                                                                                                                                                                                                                                                                                                                                                                                                                                                                                                                                                                                                                                                                                                                                                                                                                                                                                                                                                            | BCCDC Public Health Laboratory                                                                                                                           | Ana Pacagnella; Corrinne Ng; Dan Fornika; John Tyson; Kim Macdonald; Kimia Kamelian; Linda Hoang; Loretta Janz; Mel Kraiden; Prystajczyk Natalie; Robert Azana; Shannon Russell |
| EPI_ISL_2637532, EPI_ISL_2637567, EPI_ISL_2637858, EPI_ISL_2637932, EPI_ISL_2983811, EPI_ISL_2983830, EPI_ISL_2983840, EPI_ISL_2983842, EPI_ISL_2983859, EPI_ISL_2983861, EPI_ISL_2983876, EPI_ISL_2983909, EPI_ISL_3391771, EPI_ISL_3393347, EPI_ISL_3393515                                                                                                                                                                                                                                                                                                                                                                                                                                                                                                                                                                                                                                                                                                                                                                                                                                                                                                                                                                                                                                                                                                                                                                                                                                                                                         | see above                                                                                           | BIO ARD/AISNE                                                                                                                              | Department of Virology, Henri Mondor University Hospital, Assistance Publique Hôpitaux de Paris, Université Paris-Est Créteil, INSERM U955                                                                                                                                                                                                                                                                                                                                                                                                                                                                                                                                                                                                                                                                                                                                                                                                                                                | Alexandre Soulier; Christophe Rodriguez; Elisabeth Trawinski; Guillaume Gricourt; Jean-Michel Pawlatsky; Melissa N'Debi; Slim Fourati; Vanessa Demontant |                                                                                                                                                                                 |
| EPI_ISL_3153872                                                                                                                                                                                                                                                                                                                                                                                                                                                                                                                                                                                                                                                                                                                                                                                                                                                                                                                                                                                                                                                                                                                                                                                                                                                                                                                                                                                                                                                                                                                                       | BIO AUSTRAL                                                                                         | UMR PIMIT                                                                                                                                  | Dr Camille Lebarbenchon; Dr David A Wilkinson; Dr Patrick Mavingui; Magali Turpin; Marie-Alice Simbi                                                                                                                                                                                                                                                                                                                                                                                                                                                                                                                                                                                                                                                                                                                                                                                                                                                                                      |                                                                                                                                                          |                                                                                                                                                                                 |
| EPI_ISL_2795729, EPI_ISL_2795759, EPI_ISL_2795827, EPI_ISL_2878469, EPI_ISL_2878513, EPI_ISL_2983889, EPI_ISL_2983919, EPI_ISL_2983928, EPI_ISL_3392126                                                                                                                                                                                                                                                                                                                                                                                                                                                                                                                                                                                                                                                                                                                                                                                                                                                                                                                                                                                                                                                                                                                                                                                                                                                                                                                                                                                               | see above                                                                                           | BIO67-BIOSPHERE                                                                                                                            | Department of Virology, Henri Mondor University Hospital, Assistance Publique Hôpitaux de Paris, Université Paris-Est Créteil, INSERM U955                                                                                                                                                                                                                                                                                                                                                                                                                                                                                                                                                                                                                                                                                                                                                                                                                                                | Alexandre Soulier; Christophe Rodriguez; Elisabeth Trawinski; Guillaume Gricourt; Jean-Michel Pawlatsky; Melissa N'Debi; Slim Fourati; Vanessa Demontant |                                                                                                                                                                                 |
| EPI_ISL_2448639                                                                                                                                                                                                                                                                                                                                                                                                                                                                                                                                                                                                                                                                                                                                                                                                                                                                                                                                                                                                                                                                                                                                                                                                                                                                                                                                                                                                                                                                                                                                       | BIO06                                                                                               | CHU Poitiers                                                                                                                               | Agnes BEBY-DEFAUX; Birama N'DIAYE; Caroline MICHAUD; Magali GARCIA; Manon PRAT; Maxime PICHON; Nicolas LEVEQUE; Valentin BON-BARET                                                                                                                                                                                                                                                                                                                                                                                                                                                                                                                                                                                                                                                                                                                                                                                                                                                        |                                                                                                                                                          |                                                                                                                                                                                 |
| EPI_ISL_2567469                                                                                                                                                                                                                                                                                                                                                                                                                                                                                                                                                                                                                                                                                                                                                                                                                                                                                                                                                                                                                                                                                                                                                                                                                                                                                                                                                                                                                                                                                                                                       | BIOGROUP LABORATOIRE ST DIE                                                                         | CNR Virus des Infections Respiratoires - France SUD                                                                                        | Antonin Bai; Bruno Lina; Bruno Simon; Gregory Destras; Gwendolynne Burfin; Hadrien Regue; Laurence Josset; Martine Valette; Quentin Semanas                                                                                                                                                                                                                                                                                                                                                                                                                                                                                                                                                                                                                                                                                                                                                                                                                                               |                                                                                                                                                          |                                                                                                                                                                                 |
| EPI_ISL_2637816, EPI_ISL_2637890, EPI_ISL_2637944, EPI_ISL_2795692, EPI_ISL_2878553, EPI_ISL_2983836, EPI_ISL_2983907, EPI_ISL_2984217                                                                                                                                                                                                                                                                                                                                                                                                                                                                                                                                                                                                                                                                                                                                                                                                                                                                                                                                                                                                                                                                                                                                                                                                                                                                                                                                                                                                                | see above                                                                                           | BIOMNIS EUROFINIS IVRY                                                                                                                     | Department of Virology, Henri Mondor University Hospital, Assistance Publique Hôpitaux de Paris, Université Paris-Est Créteil, INSERM U955                                                                                                                                                                                                                                                                                                                                                                                                                                                                                                                                                                                                                                                                                                                                                                                                                                                | Alexandre Soulier; Christophe Rodriguez; Elisabeth Trawinski; Guillaume Gricourt; Jean-Michel Pawlatsky; Melissa N'Debi; Slim Fourati; Vanessa Demontant |                                                                                                                                                                                 |
| EPI_ISL_2373847, EPI_ISL_2567340, EPI_ISL_2933331, EPI_ISL_2933332, EPI_ISL_2933333, EPI_ISL_2933463, EPI_ISL_2933464, EPI_ISL_2933465, EPI_ISL_2933466, EPI_ISL_2933467, EPI_ISL_2933468, EPI_ISL_2933469, EPI_ISL_2933470, EPI_ISL_2933471, EPI_ISL_2933472, EPI_ISL_2933473, EPI_ISL_2933474, EPI_ISL_2933475, EPI_ISL_2933476, EPI_ISL_2933477, EPI_ISL_2933478, EPI_ISL_2933479, EPI_ISL_2933480, EPI_ISL_2933481, EPI_ISL_2933482, EPI_ISL_2933483, EPI_ISL_2933484, EPI_ISL_2933485, EPI_ISL_2933487, EPI_ISL_2933488, EPI_ISL_3130393                                                                                                                                                                                                                                                                                                                                                                                                                                                                                                                                                                                                                                                                                                                                                                                                                                                                                                                                                                                                         | see above                                                                                           | BIOMNIS LYON                                                                                                                               | CNR Virus des Infections Respiratoires - France SUD                                                                                                                                                                                                                                                                                                                                                                                                                                                                                                                                                                                                                                                                                                                                                                                                                                                                                                                                       | Antonin Bai; Bruno Lina; Bruno Simon; Gregory Destras; Gwendolynne Burfin; Hadrien Regue; Laurence Josset; Martine Valette; Quentin Semanas              |                                                                                                                                                                                 |
| EPI_ISL_4459391, EPI_ISL_4459401, EPI_ISL_4459411                                                                                                                                                                                                                                                                                                                                                                                                                                                                                                                                                                                                                                                                                                                                                                                                                                                                                                                                                                                                                                                                                                                                                                                                                                                                                                                                                                                                                                                                                                     | BIÑAN CITY HEALTH OFFICE II                                                                         | Research Institute for Tropical Medicine/Tohoku University                                                                                 | Allen Anthony Laraño; Ardiane Ysabelle Dolor; Catalino Demetria; Clyde Dapal; Emmanuel Kagning Tsinda; Francisco Gerardo Polotan; Hitoshi Oshitani; Inez Andrea Medado; Jefferson Earl Halog; Lei Lanna Dancel; Leilanie Nacion; Ma. Angelica Tujan; Machiko Okamoto; Maria Carmen Corpuz; Mariko Siato-Obata; Mayuko Saito                                                                                                                                                                                                                                                                                                                                                                                                                                                                                                                                                                                                                                                               |                                                                                                                                                          |                                                                                                                                                                                 |
| EPI_ISL_4459404, EPI_ISL_4459407                                                                                                                                                                                                                                                                                                                                                                                                                                                                                                                                                                                                                                                                                                                                                                                                                                                                                                                                                                                                                                                                                                                                                                                                                                                                                                                                                                                                                                                                                                                      | BIÑAN DOCTORS' HOSPITAL, INC.                                                                       | Research Institute for Tropical Medicine/Tohoku University                                                                                 | Allen Anthony Laraño; Ardiane Ysabelle Dolor; Catalino Demetria; Clyde Dapal; Emmanuel Kagning Tsinda; Francisco Gerardo Polotan; Hitoshi Oshitani; Inez Andrea Medado; Jefferson Earl Halog; Lei Lanna Dancel; Leilanie Nacion; Ma. Angelica Tujan; Machiko Okamoto; Maria Carmen Corpuz; Mariko Siato-Obata; Mayuko Saito                                                                                                                                                                                                                                                                                                                                                                                                                                                                                                                                                                                                                                                               |                                                                                                                                                          |                                                                                                                                                                                 |
| EPI_ISL_2637653                                                                                                                                                                                                                                                                                                                                                                                                                                                                                                                                                                                                                                                                                                                                                                                                                                                                                                                                                                                                                                                                                                                                                                                                                                                                                                                                                                                                                                                                                                                                       | BROUSSAIS                                                                                           | Department of Virology, Henri Mondor University Hospital, Assistance Publique Hôpitaux de Paris, Université Paris-Est Créteil, INSERM U955 | Alexandre Soulier; Christophe Rodriguez; Elisabeth Trawinski; Guillaume Gricourt; Jean-Michel Pawlatsky; Melissa N'Debi; Slim Fourati; Vanessa Demontant                                                                                                                                                                                                                                                                                                                                                                                                                                                                                                                                                                                                                                                                                                                                                                                                                                  |                                                                                                                                                          |                                                                                                                                                                                 |
| EPI_ISL_5142896, EPI_ISL_5142897, EPI_ISL_5142898, EPI_ISL_5142899, EPI_ISL_5142900, EPI_ISL_5142901, EPI_ISL_5142902, EPI_ISL_5142903, EPI_ISL_5142904, EPI_ISL_5142905, EPI_ISL_5142906, EPI_ISL_5142907, EPI_ISL_5142908, EPI_ISL_5142909, EPI_ISL_5142910, EPI_ISL_5142911, EPI_ISL_5142912, EPI_ISL_5142913, EPI_ISL_5142914, EPI_ISL_5142915, EPI_ISL_5142916, EPI_ISL_5142917, EPI_ISL_5142918, EPI_ISL_5142919, EPI_ISL_5142921, EPI_ISL_5142992, EPI_ISL_5142993, EPI_ISL_5142994, EPI_ISL_5142995, EPI_ISL_5142996, EPI_ISL_5142997, EPI_ISL_5142998, EPI_ISL_5143000, EPI_ISL_5199389                                                                                                                                                                                                                                                                                                                                                                                                                                                                                                                                                                                                                                                                                                                                                                                                                                                                                                                                                      | see above                                                                                           | BTC, Khalifa University                                                                                                                    | BTC, Khalifa University                                                                                                                                                                                                                                                                                                                                                                                                                                                                                                                                                                                                                                                                                                                                                                                                                                                                                                                                                                   | Habiba Al Safar et al                                                                                                                                    |                                                                                                                                                                                 |







|                                                                                                                                                                                                                                                                                                                                                                                                                                                                                                                                                                                                                                                                                                                                                                                                                                                                                                   |                                                                                                      |                                                                                                                                            |                                                                                                                                                                                                                                                                                                                                                                                                                                                                                                                                                                                                                                                                                                                                                                                                                                                                                                                                                                                                         |
|---------------------------------------------------------------------------------------------------------------------------------------------------------------------------------------------------------------------------------------------------------------------------------------------------------------------------------------------------------------------------------------------------------------------------------------------------------------------------------------------------------------------------------------------------------------------------------------------------------------------------------------------------------------------------------------------------------------------------------------------------------------------------------------------------------------------------------------------------------------------------------------------------|------------------------------------------------------------------------------------------------------|--------------------------------------------------------------------------------------------------------------------------------------------|---------------------------------------------------------------------------------------------------------------------------------------------------------------------------------------------------------------------------------------------------------------------------------------------------------------------------------------------------------------------------------------------------------------------------------------------------------------------------------------------------------------------------------------------------------------------------------------------------------------------------------------------------------------------------------------------------------------------------------------------------------------------------------------------------------------------------------------------------------------------------------------------------------------------------------------------------------------------------------------------------------|
| EPI_ISL_2547356,<br>EPI_ISL_2547357,<br>EPI_ISL_2547358,<br>EPI_ISL_2547360,<br>EPI_ISL_2547361                                                                                                                                                                                                                                                                                                                                                                                                                                                                                                                                                                                                                                                                                                                                                                                                   | Calvinia RSC Clinic                                                                                  | National Health Laboratory Service/University of Cape Town (NHLS/UCT)                                                                      | Arash Iranzadeh; Bruna Galvao; Carolyn Williamson; Deelan Doolabh; Diana Hardie; Gert Marais; Innocent Mudau; Lynn Tyers; Marvin Hsiao; Stephen Korsman                                                                                                                                                                                                                                                                                                                                                                                                                                                                                                                                                                                                                                                                                                                                                                                                                                                 |
| EPI_ISL_5587895, EPI_ISL_5587896, EPI_ISL_5587897, EPI_ISL_5587898, EPI_ISL_5587899, EPI_ISL_5587900, EPI_ISL_5587901, EPI_ISL_5587902, EPI_ISL_5587903, EPI_ISL_5587904, EPI_ISL_5587905, EPI_ISL_5587906, EPI_ISL_5587907, EPI_ISL_5587908, EPI_ISL_5587910, EPI_ISL_5587911, EPI_ISL_5587912                                                                                                                                                                                                                                                                                                                                                                                                                                                                                                                                                                                                   | see above                                                                                            | Caraga Regional Hospital GeneXpert Laboratory                                                                                              | Philippine Genome Center                                                                                                                                                                                                                                                                                                                                                                                                                                                                                                                                                                                                                                                                                                                                                                                                                                                                                                                                                                                |
| EPI_ISL_3120416                                                                                                                                                                                                                                                                                                                                                                                                                                                                                                                                                                                                                                                                                                                                                                                                                                                                                   | Carl-Thiem-Klinikum Cottbus - Zentrum für Laboratoriumsmedizin Mikrobiologie und Krankenhaushygiene  | Robert Koch Institute                                                                                                                      | Alethea R. de Guzman; Alyssa Joyce E. Telles; Anna Ong-Lim; Arianne A. Zamora; Benedict A. Maralit; Carlo M. Lapid; Celia Carlos; Cynthia P. Saloma; Devon Ray Pacial; Diomedes A. Cariño; Edsel Maurice Salvana; El King D. Morado; Elcid Aaron R. Pangilinan; Eva Maria Cutiongco-de la Paz; Francis A. Tablizo; Henrietta Marie Rodriguez; Jaime C. Montoya; Jan Michael C. Yap; Jarvin E. Nipales; Jo-Hannah S. Llames; John Michael Egana; John Q. Wong; Joshua Gregor A. Dizon; Joshua Jose Endozo; Juan Antonio R. Magalang; Karol Sophia Agape R. Padilla; Kris P. Punayan; Kristina Patriz Dela Cruz; Lindsay Clare D.L. Carandang; Ma. Exanii Plantig; Marc Edsel C. Ayes; Maria Rosario Singh-Vergeire; Maria Sofia L. Yangzon; Marielle M. Gamboa; Marissa Alejandra; Niña Francesca Bustamante; Razel Nikka M. Hao; Renato Jacinto Q. Mantaring; Rianna Patricia S. Cruz; Shiela Mae M. Araiza; Yvonne Valerie Austria; Zipporah Mariebelle R. Enriquez; Zyrel V. Mollejon                 |
| EPI_ISL_5524593                                                                                                                                                                                                                                                                                                                                                                                                                                                                                                                                                                                                                                                                                                                                                                                                                                                                                   | Carnarvon Municipal Clinic                                                                           | NHLS/UCT                                                                                                                                   | Arash Iranzadeh; Bruna Galvao; Carolyn Williamson; Deelan Doolabh; Diana Hardie; Gert Marais; Innocent Mudau; Lynn Tyers; Marvin Hsiao; Rageema Joseph; Stephen Korsman                                                                                                                                                                                                                                                                                                                                                                                                                                                                                                                                                                                                                                                                                                                                                                                                                                 |
| EPI_ISL_4713556, EPI_ISL_5538445, EPI_ISL_5540428, EPI_ISL_5540446, EPI_ISL_5540453, EPI_ISL_5543245, EPI_ISL_5543246, EPI_ISL_5543279, EPI_ISL_5543280, EPI_ISL_5543295, EPI_ISL_5543299, EPI_ISL_5543304, EPI_ISL_5544099, EPI_ISL_5547535, EPI_ISL_5547650                                                                                                                                                                                                                                                                                                                                                                                                                                                                                                                                                                                                                                     | see above                                                                                            | Cebu TB Reference Laboratory                                                                                                               | Philippine Genome Center                                                                                                                                                                                                                                                                                                                                                                                                                                                                                                                                                                                                                                                                                                                                                                                                                                                                                                                                                                                |
| EPI_ISL_2574071,<br>EPI_ISL_2750849                                                                                                                                                                                                                                                                                                                                                                                                                                                                                                                                                                                                                                                                                                                                                                                                                                                               | Center for Laboratory Medicine                                                                       | Center for Laboratory Medicine                                                                                                             | Alethea R. de Guzman; Anna Ong-Lim; Arianne A. Zamora; Benedict A. Maralit; Carlo M. Lapid; Celia Carlos; Cynthia P. Saloma; Devon Ray Pacial; Diomedes A. Cariño; Edsel Maurice Salvana; El King D. Morado; Elcid Aaron R. Pangilinan; Eva Maria Cutiongco-de la Paz; Francis A. Tablizo; Henrietta Marie Rodriguez; Jaime C. Montoya; Jan Michael C. Yap; Jarvin E. Nipales; Jo-Hannah S. Llames; John Q. Wong; Joshua Gregor A. Dizon; Juan Antonio R. Magalang; Karol Sophia Agape R. Padilla; Kenneth M. Kim; Kris P. Punayan; Kristina Patriz Dela Cruz; Lindsay Clare D.L. Carandang; Ma. Exanii Plantig; Marc Edsel C. Ayes; Maria Rosario Singh-Vergeire; Maria Sofia L. Yangzon; Marielle M. Gamboa; Marissa Alejandra; Niña Francesca Bustamante; Razel Nikka M. Hao; Renato Jacinto Q. Mantaring; Rianna Patricia S. Cruz; Shiela Mae M. Araiza; Yvonne Valerie Austria; Zipporah Mariebelle R. Enriquez; Zyrel V. Mollejon                                                                 |
| EPI_ISL_4236051                                                                                                                                                                                                                                                                                                                                                                                                                                                                                                                                                                                                                                                                                                                                                                                                                                                                                   | Center for Virology                                                                                  | Center for Virology                                                                                                                        | Jeremy V. Camp; Karin Stiasny; Monika Redlberger-Fritz; Stephan W. Aberle                                                                                                                                                                                                                                                                                                                                                                                                                                                                                                                                                                                                                                                                                                                                                                                                                                                                                                                               |
| EPI_ISL_5879609                                                                                                                                                                                                                                                                                                                                                                                                                                                                                                                                                                                                                                                                                                                                                                                                                                                                                   | Center of Excellence in Clinical Virology                                                            | Research Unit of Systems Microbiology                                                                                                      | Amormmas Kongkhiang; Jira Chansanenroj; Jiratchaya Puenpa; Kamolthip Atsawararunant; Nungruthai Suntronwong; Nutsada Saengdao; Oraphan Mayuramarat; Pakkapor Panwijitkul; Pattaraporn Nimsamer; Pathaya Rattanakomol; Ritthideach Yorsaeng; Rijupat Wasitthankasem; Sunchai Payungporn; Suwanna Petto; Vichan Pawun; Vorthon Sawaswong; Yong Poovorawan                                                                                                                                                                                                                                                                                                                                                                                                                                                                                                                                                                                                                                                 |
| EPI_ISL_2385354,<br>EPI_ISL_2385404                                                                                                                                                                                                                                                                                                                                                                                                                                                                                                                                                                                                                                                                                                                                                                                                                                                               | Center of Hygiene and Epidemiology in Belgorod Region                                                | WHO National Influenza Centre Russian Federation                                                                                           | Alexey Masharsky; Andrey Komissarov; Artem Fadeev; Daria Danilenko; Dmitry Lioznov; Elena Nabieva; Georgii Bazykin; Kirill Varchenko; Ksenia Safina; Kseniya Komissarova; Maria Baturova; Maria Pisareva; Maria Timofeeva; Mikhail Bakaev; Nikita Yolshin; Oula Masour; Tamila Musaeva; Veronika Eder                                                                                                                                                                                                                                                                                                                                                                                                                                                                                                                                                                                                                                                                                                   |
| EPI_ISL_5854267                                                                                                                                                                                                                                                                                                                                                                                                                                                                                                                                                                                                                                                                                                                                                                                                                                                                                   | Centers for Disease Control, R.O.C. (Taiwan)                                                         | Centers for Disease Control, R.O.C. (Taiwan)                                                                                               | Ji-Rong Yang; Jung-Jung Mu; Ming-Tsan-Liu; Yu-Chi-Lin                                                                                                                                                                                                                                                                                                                                                                                                                                                                                                                                                                                                                                                                                                                                                                                                                                                                                                                                                   |
| EPI_ISL_2402615,<br>EPI_ISL_2612528                                                                                                                                                                                                                                                                                                                                                                                                                                                                                                                                                                                                                                                                                                                                                                                                                                                               | Centracare Laboratory Services                                                                       | Minnesota Department of Health, Public Health Laboratory                                                                                   | Alexandra Lorentz; Jacob Garfin; Matt Plumb; and Xiong Wang                                                                                                                                                                                                                                                                                                                                                                                                                                                                                                                                                                                                                                                                                                                                                                                                                                                                                                                                             |
| EPI_ISL_2834926                                                                                                                                                                                                                                                                                                                                                                                                                                                                                                                                                                                                                                                                                                                                                                                                                                                                                   | Central Health Laboratory/Airport Health Laboratory                                                  | Central Health Laboratory ,Victoria Hospital, Candos,Ministry of Health and Wellness, Mauritius                                            | Bahadoor BS; Jannoo N; Manraj SS; Mathur H; Patoo M; Ramuth M; Sonoo J; Sujeewon C                                                                                                                                                                                                                                                                                                                                                                                                                                                                                                                                                                                                                                                                                                                                                                                                                                                                                                                      |
| EPI_ISL_2502516                                                                                                                                                                                                                                                                                                                                                                                                                                                                                                                                                                                                                                                                                                                                                                                                                                                                                   | Central Laboratory, Bureau of Public Health (BOG) and Academic Hospital Paramaribo                   | Erasmus Medical Center                                                                                                                     | Bas B Oude Munnink; Cherise Beek; Consuella Partowidjojo; Dion Gajadin; Ed PF IJzerman; Emmanuelle Munger; Gary Gummels; Ingrid SK Krishnath; Lycke Woittiez; Marion PG Koopmans; Mireille Van de Veer; Phyllis Pinas; Princes Wongsowidjojo; Radjesh Ori; Ranisha Doerballie; Rohma Banwari; Soeradj Harkisoen; Stephen Vreden; Tilotmadebie Ramlal; Verne Nanhoe                                                                                                                                                                                                                                                                                                                                                                                                                                                                                                                                                                                                                                      |
| EPI_ISL_5547421                                                                                                                                                                                                                                                                                                                                                                                                                                                                                                                                                                                                                                                                                                                                                                                                                                                                                   | Central Luzon Doctor's Hospital Inc.                                                                 | Philippine Genome Center                                                                                                                   | Alethea R. de Guzman; Anna Ong-Lim; Arianne A. Zamora; Benedict A. Maralit; Carlo M. Lapid; Celia Carlos; Cynthia P. Saloma; Devon Ray Pacial; Diomedes A. Cariño; Edsel Maurice Salvana; El King D. Morado; Elcid Aaron R. Pangilinan; Eva Maria Cutiongco-de la Paz; Francis A. Tablizo; Henrietta Marie Rodriguez; Jaime C. Montoya; Jan Michael C. Yap; Jarvin E. Nipales; Jo-Hannah S. Llames; John Q. Wong; Joshua Gregor A. Dizon; Juan Antonio R. Magalang; Karol Sophia Agape R. Padilla; Kenneth M. Kim; Kris P. Punayan; Kristina Patriz Dela Cruz; Lindsay Clare D.L. Carandang; Ma. Exanii Plantig; Marc Edsel C. Ayes; Maria Rosario Singh-Vergeire; Maria Sofia L. Yangzon; Marielle M. Gamboa; Marissa Alejandra; Niña Francesca Bustamante; Razel Nikka M. Hao; Renato Jacinto Q. Mantaring; Rianna Patricia S. Cruz; Shiela Mae M. Araiza; Yvonne Valerie Austria; Zipporah Mariebelle R. Enriquez; Zyrel V. Mollejon                                                                 |
| EPI_ISL_2463960                                                                                                                                                                                                                                                                                                                                                                                                                                                                                                                                                                                                                                                                                                                                                                                                                                                                                   | Central Public Health Lab, National Public Health Organization                                       | Central Public Health Lab, National Public Health Organization                                                                             | Gregory Spanakos et al; Kyriaki Tryfinopoulou                                                                                                                                                                                                                                                                                                                                                                                                                                                                                                                                                                                                                                                                                                                                                                                                                                                                                                                                                           |
| EPI_ISL_3944571                                                                                                                                                                                                                                                                                                                                                                                                                                                                                                                                                                                                                                                                                                                                                                                                                                                                                   | Central Public Health Laboratory - LACEN -Bahia, Salvador, Brazil                                    | Central Public Health Laboratory - LACEN -Bahia, Salvador, Brazil                                                                          | Arabela Leal; Felicidade Pereira; Gabriela Menezes; Jaqueline Gomes; Lenisa Dandara; Luciana Oliveira; Luiz Alcantara; Marcela Gómez; Marta Giovanetti; Stephane Tosta; Vagner Fonseca; Vanessa Nardy                                                                                                                                                                                                                                                                                                                                                                                                                                                                                                                                                                                                                                                                                                                                                                                                   |
| EPI_ISL_3045179,<br>EPI_ISL_3045180,<br>EPI_ISL_3597641,<br>EPI_ISL_3598628                                                                                                                                                                                                                                                                                                                                                                                                                                                                                                                                                                                                                                                                                                                                                                                                                       | Central Public Health Laboratory, National Public Health Organization                                | Central Public Health Laboratory, National Public Health Organization                                                                      | A.Katsoulidou et al; G.Spanakos; Kyriaki Tryfinopoulou                                                                                                                                                                                                                                                                                                                                                                                                                                                                                                                                                                                                                                                                                                                                                                                                                                                                                                                                                  |
| EPI_ISL_4169885                                                                                                                                                                                                                                                                                                                                                                                                                                                                                                                                                                                                                                                                                                                                                                                                                                                                                   | Central Virology Laboratory, Israel Ministry of Health                                               | Israel Institute for Biological Research                                                                                                   | Adi Beth-Din; Anat Zvi; Inbar Cohen-Gihon; Nir Paran; Ofir Israeli; Yfat Yahalom Ronen                                                                                                                                                                                                                                                                                                                                                                                                                                                                                                                                                                                                                                                                                                                                                                                                                                                                                                                  |
| EPI_ISL_5062255,<br>EPI_ISL_5062256                                                                                                                                                                                                                                                                                                                                                                                                                                                                                                                                                                                                                                                                                                                                                                                                                                                               | Centre Hospitalier Eure Seine                                                                        | Centre Hospitalier Universitaire de Rouen Laboratoire de Virologie                                                                         | Alice Moisan; Fabienne De Oliveira; Marie Leoz                                                                                                                                                                                                                                                                                                                                                                                                                                                                                                                                                                                                                                                                                                                                                                                                                                                                                                                                                          |
| EPI_ISL_2491660                                                                                                                                                                                                                                                                                                                                                                                                                                                                                                                                                                                                                                                                                                                                                                                                                                                                                   | Centre Hospitalier Universitaire Clermont-Ferrand                                                    | CHU Clermont-Ferrand, service de virologie                                                                                                 | Bisseux Maxime; Combes Patricia; Henquell Cécile; Mirand Audrey                                                                                                                                                                                                                                                                                                                                                                                                                                                                                                                                                                                                                                                                                                                                                                                                                                                                                                                                         |
| EPI_ISL_2688658,<br>EPI_ISL_2688660,<br>EPI_ISL_2688661,<br>EPI_ISL_2688687,<br>EPI_ISL_2688754,<br>EPI_ISL_2688780                                                                                                                                                                                                                                                                                                                                                                                                                                                                                                                                                                                                                                                                                                                                                                               | Centre Hospitalier Universitaire de Rouen Laboratoire de Virologie                                   | Centre Hospitalier Universitaire de Rouen Laboratoire de Virologie                                                                         | Alice Moisan; Fabienne De Oliveira; Marie Leoz                                                                                                                                                                                                                                                                                                                                                                                                                                                                                                                                                                                                                                                                                                                                                                                                                                                                                                                                                          |
| EPI_ISL_2401762                                                                                                                                                                                                                                                                                                                                                                                                                                                                                                                                                                                                                                                                                                                                                                                                                                                                                   | Centre Hospitalier du Nord                                                                           | Laboratoire national de sante. Microbiology, Microbial Genomics Platform                                                                   | Anke Wienecke-Baldacchino; Catherine Ragimbeau; Fatiha Boulmerka; Fatu Djabi; Jacqueline Parmentier; Jessica Tapp; Lise Pignon; Raoul Salmon; Tamir Abdelrahman                                                                                                                                                                                                                                                                                                                                                                                                                                                                                                                                                                                                                                                                                                                                                                                                                                         |
| EPI_ISL_2491664                                                                                                                                                                                                                                                                                                                                                                                                                                                                                                                                                                                                                                                                                                                                                                                                                                                                                   | Centre hospitalier D'AURILLAC                                                                        | CHU Clermont-Ferrand, service de virologie                                                                                                 | Bisseux Maxime; Combes Patricia; Henquell Cécile; Mirand Audrey                                                                                                                                                                                                                                                                                                                                                                                                                                                                                                                                                                                                                                                                                                                                                                                                                                                                                                                                         |
| EPI_ISL_2442084, EPI_ISL_2442087, EPI_ISL_2442090, EPI_ISL_2442091, EPI_ISL_2442096, EPI_ISL_2442097, EPI_ISL_2442098, EPI_ISL_2442099, EPI_ISL_2442103, EPI_ISL_2442104, EPI_ISL_2442107, EPI_ISL_2442108, EPI_ISL_2442109, EPI_ISL_2442110, EPI_ISL_2442112, EPI_ISL_2442113, EPI_ISL_2442115, EPI_ISL_2442116, EPI_ISL_2442117, EPI_ISL_2442122, EPI_ISL_2442123, EPI_ISL_2442124, EPI_ISL_2442127, EPI_ISL_2442128, EPI_ISL_2442132, EPI_ISL_2442136, EPI_ISL_2442138, EPI_ISL_2442140, EPI_ISL_2442145, EPI_ISL_2442146, EPI_ISL_2442148, EPI_ISL_2442149, EPI_ISL_2442152, EPI_ISL_2442156, EPI_ISL_2442159, EPI_ISL_2442162, EPI_ISL_2442163, EPI_ISL_2442165, EPI_ISL_2442167, EPI_ISL_2442169, EPI_ISL_2442172, EPI_ISL_2442173, EPI_ISL_2442174, EPI_ISL_2442175, EPI_ISL_2442176, EPI_ISL_2442177, EPI_ISL_2442178, EPI_ISL_2442185, EPI_ISL_2442194, EPI_ISL_2442195, EPI_ISL_3246531 | Centro de Investigación em Saúde de Manhiça (CISM) & ISGlobal, Institut de Salut Global de Barcelona | Instituto de Biomedicina de València - CSIC                                                                                                |                                                                                                                                                                                                                                                                                                                                                                                                                                                                                                                                                                                                                                                                                                                                                                                                                                                                                                                                                                                                         |
| see above                                                                                                                                                                                                                                                                                                                                                                                                                                                                                                                                                                                                                                                                                                                                                                                                                                                                                         | Centro de Investigación em Saúde de Manhiça (CISM) & ISGlobal, Institut de Salut Global de Barcelona | Instituto de Biomedicina de València - CSIC                                                                                                | Alfredo Mayor; Arsenia Massinga; Inacio Mandomando; Irving Cancino; Iñaki Comas; Manoli Torres Puente; Santiago Jiménez-Serrano                                                                                                                                                                                                                                                                                                                                                                                                                                                                                                                                                                                                                                                                                                                                                                                                                                                                         |
| EPI_ISL_2798716                                                                                                                                                                                                                                                                                                                                                                                                                                                                                                                                                                                                                                                                                                                                                                                                                                                                                   | Centrālā Laboratorija, SIA                                                                           | Riga East University Hospital, National Microbiology Reference Laboratory; Eurofins Genomics Europe Sequencing GmbH                        | Arzu Aļģuleiva; Diāna Dušacka; Dārta Pūpola; Ilva Pole; Jana Osīte; Jevgenijs Bodrenko; Jūlija Čevere; Reinis Vangravs; Reinis Zeltmatis; Sergejs Nikišins; Stella Lapina; Girts Šķenders                                                                                                                                                                                                                                                                                                                                                                                                                                                                                                                                                                                                                                                                                                                                                                                                               |
| EPI_ISL_2795794,<br>EPI_ISL_2878483,<br>EPI_ISL_3477743                                                                                                                                                                                                                                                                                                                                                                                                                                                                                                                                                                                                                                                                                                                                                                                                                                           | Cerballiance Paris IDF est Saint-Denis                                                               | Department of Virology, Henri Mondor University Hospital, Assistance Publique Hôpitaux de Paris, Université Paris-Est Créteil, INSERM U955 | Alexandre Soulier; Christophe Rodriguez; Elisabeth Trawinski; Guillaume Gricourt; Jean-Michel Pawlowsky; Melissa N'Debi; Slim Fourati; Vanessa Demontant                                                                                                                                                                                                                                                                                                                                                                                                                                                                                                                                                                                                                                                                                                                                                                                                                                                |
| EPI_ISL_2446013, EPI_ISL_2446014, EPI_ISL_2446017, EPI_ISL_2446018, EPI_ISL_2446019, EPI_ISL_2446026, EPI_ISL_2446027, EPI_ISL_2446028, EPI_ISL_3071111, EPI_ISL_3341975                                                                                                                                                                                                                                                                                                                                                                                                                                                                                                                                                                                                                                                                                                                          | see above                                                                                            | Child Health Research Foundation                                                                                                           | Child Health Research Foundation                                                                                                                                                                                                                                                                                                                                                                                                                                                                                                                                                                                                                                                                                                                                                                                                                                                                                                                                                                        |
| EPI_ISL_4714975, EPI_ISL_5542770, EPI_ISL_5542774, EPI_ISL_5542787, EPI_ISL_5542922, EPI_ISL_5569893, EPI_ISL_5570531                                                                                                                                                                                                                                                                                                                                                                                                                                                                                                                                                                                                                                                                                                                                                                             | see above                                                                                            | Chinese General Hospital                                                                                                                   | Philippine Genome Center                                                                                                                                                                                                                                                                                                                                                                                                                                                                                                                                                                                                                                                                                                                                                                                                                                                                                                                                                                                |
| EPI_ISL_2445981,<br>EPI_ISL_2445994,<br>EPI_ISL_2445996                                                                                                                                                                                                                                                                                                                                                                                                                                                                                                                                                                                                                                                                                                                                                                                                                                           | Chittagong General Hospital                                                                          | Child Health Research Foundation                                                                                                           | Alethea R. de Guzman; Alyssa Joyce E. Telles; Anna Ong-Lim; Arianne A. Zamora; Benedict A. Maralit; Carlo M. Lapid; Celia Carlos; Cynthia P. Saloma; Devon Ray Pacial; Diomedes A. Cariño; Edsel Maurice Salvana; El King D. Morado; Elcid Aaron R. Pangilinan; Eva Maria Cutiongco-de la Paz; Francis A. Tablizo; Henrietta Marie Rodriguez; Jaime C. Montoya; Jan Michael C. Yap; Jarvin E. Nipales; Jo-Hannah S. Llames; John Michael Egana; John Q. Wong; Joshua Gregor A. Dizon; Joshua Jose Endozo; Juan Antonio R. Magalang; Karol Sophia Agape R. Padilla; Kenneth M. Kim; Kris P. Punayan; Kristina Patriz Dela Cruz; Lindsay Clare D.L. Carandang; Ma. Exanii Plantig; Marc Edsel C. Ayes; Maria Rosario Singh-Vergeire; Maria Sofia L. Yangzon; Marielle M. Gamboa; Marissa Alejandra; Niña Francesca Bustamante; Razel Nikka M. Hao; Renato Jacinto Q. Mantaring; Rianna Patricia S. Cruz; Shiela Mae M. Araiza; Yvonne Valerie Austria; Zipporah Mariebelle R. Enriquez; Zyrel V. Mollejon |
| EPI_ISL_2445981,<br>EPI_ISL_2445994,<br>EPI_ISL_2445996                                                                                                                                                                                                                                                                                                                                                                                                                                                                                                                                                                                                                                                                                                                                                                                                                                           | Chittagong General Hospital                                                                          | Child Health Research Foundation                                                                                                           | Adnan Mannan; CHRf Bangladesh Genomics Team; H. M. Hamidullah Mehedi; Md. Abdur Rob; Md. Minhazul Hoque; Rajdeep Biswas                                                                                                                                                                                                                                                                                                                                                                                                                                                                                                                                                                                                                                                                                                                                                                                                                                                                                 |
| EPI_ISL_3118689,<br>EPI_ISL_3118694,<br>EPI_ISL_3118695                                                                                                                                                                                                                                                                                                                                                                                                                                                                                                                                                                                                                                                                                                                                                                                                                                           | Chris Hanı Baragwanath Academic Hospital POC laboratory                                              | KRISP, KZn Research Innovation and Sequencing Platform                                                                                     | Brown MJ; Emmanuel SJ; Giandhari J; Lessells R; Omar S; Pillay S; Tegally H; Wadula J; Wilkinson E; Yajna R; de Oliveira T                                                                                                                                                                                                                                                                                                                                                                                                                                                                                                                                                                                                                                                                                                                                                                                                                                                                              |
| EPI_ISL_2920282                                                                                                                                                                                                                                                                                                                                                                                                                                                                                                                                                                                                                                                                                                                                                                                                                                                                                   | City of Milwaukee Health Department Laboratory                                                       | City of Milwaukee Health Department Laboratory                                                                                             | Amy Bauer; Jennifer Lentz; Manjeet Khubbar; Samantha Scott; Sanjib Bhattacharyya                                                                                                                                                                                                                                                                                                                                                                                                                                                                                                                                                                                                                                                                                                                                                                                                                                                                                                                        |

|                                                                                                                                                                                                                                                                                                                                                                                                                                                                                                                                                                                                                                                                                                                                                                                                                                                                                                                                                                                                                                                                                                                                                                                                                                                                                                          |                                                            |                                                                                                                                            |                                                                                                                                                                                                                                                                                                                                                                                                                                                                                                                                                                                                                                                                                                                                                                                                                                                                                                                                                                                                                                                                                   |
|----------------------------------------------------------------------------------------------------------------------------------------------------------------------------------------------------------------------------------------------------------------------------------------------------------------------------------------------------------------------------------------------------------------------------------------------------------------------------------------------------------------------------------------------------------------------------------------------------------------------------------------------------------------------------------------------------------------------------------------------------------------------------------------------------------------------------------------------------------------------------------------------------------------------------------------------------------------------------------------------------------------------------------------------------------------------------------------------------------------------------------------------------------------------------------------------------------------------------------------------------------------------------------------------------------|------------------------------------------------------------|--------------------------------------------------------------------------------------------------------------------------------------------|-----------------------------------------------------------------------------------------------------------------------------------------------------------------------------------------------------------------------------------------------------------------------------------------------------------------------------------------------------------------------------------------------------------------------------------------------------------------------------------------------------------------------------------------------------------------------------------------------------------------------------------------------------------------------------------------------------------------------------------------------------------------------------------------------------------------------------------------------------------------------------------------------------------------------------------------------------------------------------------------------------------------------------------------------------------------------------------|
| EPI_ISL_2859300, EPI_ISL_5547415, EPI_ISL_5547721                                                                                                                                                                                                                                                                                                                                                                                                                                                                                                                                                                                                                                                                                                                                                                                                                                                                                                                                                                                                                                                                                                                                                                                                                                                        | Ciudad Medical Zamboanga                                   | Philippine Genome Center                                                                                                                   | Alethea R. de Guzman; Anna Ong-Lim; Arianne A. Zamora; Benedict A. Maralit; Carlo M. Lapid; Celia Carlos; Cynthia P. Saloma; Devon Ray Pacial; Diomedes A. Carino; Diomedes A. Cariño; Edsel Maurice Salvana; Edsel Maurice Salvaña; El King D. Morado; Elcid Aaron R. Pangilinan; Eva Maria Cutiongco-de la Paz; Francis A. Tablizo; Henrietta Marie Rodriguez; Jaime C. Montoya; Jan Michael C. Yap; Jarvin E. Nipales; Jo-Hannah S. Llames; John Q. Wong; Joshua Gregor A. Dizon; Juan Antonio R. Magalang; Karol Sophia Agape R. Padilla; Kenneth M. Kim; Kris P. Punayan; Kristina Patriz Dela Cruz; Kristina Patriz Dela Cruz; Lindsay Claire D.L. Carandang; Ma. Exanil Plantig; Marc Edsel C. Ayes; Maria Rosario Singh-Vergeire and Cynthia P. Saloma; Maria Sofia L. Yangzon; Marielle M Gamba; Marielle M. Gamba; Marissa Alejandria; Nina Francesca Bustamante; Niña Francesca Bustamante; Razel Nikka M. Hao; Renato Jacinto Q. Mantaring; Rianna Patricia S. Cruz; Sheila Mae M. Araiza; Yvonne Valerie Austria; Zipporah Mariebelle R. Enriquez; Zyrel V. Molljeon |
| EPI_ISL_2375926                                                                                                                                                                                                                                                                                                                                                                                                                                                                                                                                                                                                                                                                                                                                                                                                                                                                                                                                                                                                                                                                                                                                                                                                                                                                                          | Clanwilliam Hospital wc CLH                                | NHLS/UCT                                                                                                                                   | Arash Iranzadeh; Bruna Galvao; Carolyn Williamson; Deelan Doolabh; Diana Hardie; Innocent Mudau; Kruger Marais; Lynn Tyers; Marvin Hsiao; Stephen Korsman                                                                                                                                                                                                                                                                                                                                                                                                                                                                                                                                                                                                                                                                                                                                                                                                                                                                                                                         |
| EPI_ISL_3506438                                                                                                                                                                                                                                                                                                                                                                                                                                                                                                                                                                                                                                                                                                                                                                                                                                                                                                                                                                                                                                                                                                                                                                                                                                                                                          | Claremont Clinic wc CLA                                    | NHLS/UCT                                                                                                                                   | Arash Iranzadeh; Bruna Galvao; Carolyn Williamson; Deelan Doolabh; Diana Hardie; Gert Marais; Innocent Mudau; Lynn Tyers; Marvin Hsiao; Rageema Joseph; Sisonke; Stephen Korsman                                                                                                                                                                                                                                                                                                                                                                                                                                                                                                                                                                                                                                                                                                                                                                                                                                                                                                  |
| EPI_ISL_3207534                                                                                                                                                                                                                                                                                                                                                                                                                                                                                                                                                                                                                                                                                                                                                                                                                                                                                                                                                                                                                                                                                                                                                                                                                                                                                          | Clinic-in-Asla                                             | NHLS/UCT                                                                                                                                   | Arash Iranzadeh; Bruna Galvao; Carolyn Williamson; Deelan Doolabh; Diana Hardie; Gert Marais; Innocent Mudau; Lynn Tyers; Marvin Hsiao; Rageema Joseph; Stephen Korsman                                                                                                                                                                                                                                                                                                                                                                                                                                                                                                                                                                                                                                                                                                                                                                                                                                                                                                           |
| EPI_ISL_2429049, EPI_ISL_2429077                                                                                                                                                                                                                                                                                                                                                                                                                                                                                                                                                                                                                                                                                                                                                                                                                                                                                                                                                                                                                                                                                                                                                                                                                                                                         | Clinical Microbiology, Infection Prevention and Control    | Section for Molecular Diagnostics                                                                                                          | Björn Hallström; Jonas Björkman                                                                                                                                                                                                                                                                                                                                                                                                                                                                                                                                                                                                                                                                                                                                                                                                                                                                                                                                                                                                                                                   |
| EPI_ISL_2626081, EPI_ISL_2885693                                                                                                                                                                                                                                                                                                                                                                                                                                                                                                                                                                                                                                                                                                                                                                                                                                                                                                                                                                                                                                                                                                                                                                                                                                                                         | Clinique Saint-Pierre Ottignies                            | UCLouvain/IREC/MBLG                                                                                                                        | Benoit Kabamba Mukadi; Bertrand Bearzatto; Jean Ruelle                                                                                                                                                                                                                                                                                                                                                                                                                                                                                                                                                                                                                                                                                                                                                                                                                                                                                                                                                                                                                            |
| EPI_ISL_2492428, EPI_ISL_2778045, EPI_ISL_2778065, EPI_ISL_2778093, EPI_ISL_2778096, EPI_ISL_3133068                                                                                                                                                                                                                                                                                                                                                                                                                                                                                                                                                                                                                                                                                                                                                                                                                                                                                                                                                                                                                                                                                                                                                                                                     | Cliniques universitaires Saint-Luc                         | UCLouvain/IREC/MBLG                                                                                                                        | Benoit Kabamba Mukadi; Bertrand Bearzatto; Jean Ruelle                                                                                                                                                                                                                                                                                                                                                                                                                                                                                                                                                                                                                                                                                                                                                                                                                                                                                                                                                                                                                            |
| EPI_ISL_4300304, EPI_ISL_4300499, EPI_ISL_4300539, EPI_ISL_4300586, EPI_ISL_5323418, EPI_ISL_5323456, EPI_ISL_5323498, EPI_ISL_5323499, EPI_ISL_5323500, EPI_ISL_5323501                                                                                                                                                                                                                                                                                                                                                                                                                                                                                                                                                                                                                                                                                                                                                                                                                                                                                                                                                                                                                                                                                                                                 | see above                                                  | Color Genomics                                                                                                                             | Chiu Laboratory, University of California, San Francisco                                                                                                                                                                                                                                                                                                                                                                                                                                                                                                                                                                                                                                                                                                                                                                                                                                                                                                                                                                                                                          |
| EPI_ISL_2715286, EPI_ISL_2932681                                                                                                                                                                                                                                                                                                                                                                                                                                                                                                                                                                                                                                                                                                                                                                                                                                                                                                                                                                                                                                                                                                                                                                                                                                                                         | Communicable Disease Laboratory, Public Health Directorate | Communicable Disease Laboratory, Public Health Directorate                                                                                 | AlAbbass, Z.; AlHujairi, Z.; Almoamen, G.; Alwasti, H.; Marhoon, A.                                                                                                                                                                                                                                                                                                                                                                                                                                                                                                                                                                                                                                                                                                                                                                                                                                                                                                                                                                                                               |
| EPI_ISL_2375910, EPI_ISL_2375911, EPI_ISL_2375921                                                                                                                                                                                                                                                                                                                                                                                                                                                                                                                                                                                                                                                                                                                                                                                                                                                                                                                                                                                                                                                                                                                                                                                                                                                        | Concordia Clinic                                           | NHLS/UCT                                                                                                                                   | Arash Iranzadeh; Bruna Galvao; Carolyn Williamson; Deelan Doolabh; Diana Hardie; Innocent Mudau; Kruger Marais; Lynn Tyers; Marvin Hsiao; Stephen Korsman                                                                                                                                                                                                                                                                                                                                                                                                                                                                                                                                                                                                                                                                                                                                                                                                                                                                                                                         |
| EPI_ISL_2375934, EPI_ISL_2621068, EPI_ISL_2621070, EPI_ISL_2621075, EPI_ISL_2802133, EPI_ISL_3207532                                                                                                                                                                                                                                                                                                                                                                                                                                                                                                                                                                                                                                                                                                                                                                                                                                                                                                                                                                                                                                                                                                                                                                                                     | Convulle CDC wc CVC                                        | NHLS/UCT                                                                                                                                   | Arash Iranzadeh; Bruna Galvao; Carolyn Williamson; Deelan Doolabh; Diana Hardie; Gert Marais; Innocent Mudau; Kruger Marais; Lynn Tyers; Marvin Hsiao; Rageema Joseph; Stephen Korsman                                                                                                                                                                                                                                                                                                                                                                                                                                                                                                                                                                                                                                                                                                                                                                                                                                                                                            |
| EPI_ISL_2859302, EPI_ISL_2860215, EPI_ISL_5544037, EPI_ISL_5544059, EPI_ISL_5544061, EPI_ISL_5544087, EPI_ISL_5544103, EPI_ISL_5568940, EPI_ISL_5569110, EPI_ISL_5569291, EPI_ISL_5569409, EPI_ISL_5570578                                                                                                                                                                                                                                                                                                                                                                                                                                                                                                                                                                                                                                                                                                                                                                                                                                                                                                                                                                                                                                                                                               | see above                                                  | Cotabato Regional and Medical Center                                                                                                       | Philippine Genome Center                                                                                                                                                                                                                                                                                                                                                                                                                                                                                                                                                                                                                                                                                                                                                                                                                                                                                                                                                                                                                                                          |
| EPI_ISL_5934886, EPI_ISL_5934887, EPI_ISL_5934898                                                                                                                                                                                                                                                                                                                                                                                                                                                                                                                                                                                                                                                                                                                                                                                                                                                                                                                                                                                                                                                                                                                                                                                                                                                        | Cotabato Regional and Medical Center                       | Philippine Genome Center Mindanao                                                                                                          | April Mae Numeron; Bai Halima Solaiman; Giovanna Fae R. Oguis; Homer Sajonia II; Ineke Knot; Isha Maria Sibong; Joan T. Acaso; Kahili Corazo; Lyre Anni E. Mura; Michael G. Bacus; Paul Lorenzo A. Gait; Ritchie Mae T. Gamot; Sherjan P. Kalim                                                                                                                                                                                                                                                                                                                                                                                                                                                                                                                                                                                                                                                                                                                                                                                                                                   |
| EPI_ISL_3957818                                                                                                                                                                                                                                                                                                                                                                                                                                                                                                                                                                                                                                                                                                                                                                                                                                                                                                                                                                                                                                                                                                                                                                                                                                                                                          | Crags Clinic wc CRG                                        | NHLS/UCT                                                                                                                                   | Arash Iranzadeh; Bruna Galvao; Carolyn Williamson; Deelan Doolabh; Diana Hardie; Gert Marais; Innocent Mudau; Lynn Tyers; Marvin Hsiao; Rageema Joseph; Stephen Korsman                                                                                                                                                                                                                                                                                                                                                                                                                                                                                                                                                                                                                                                                                                                                                                                                                                                                                                           |
| EPI_ISL_2658470, EPI_ISL_2658481, EPI_ISL_2658482, EPI_ISL_2658485, EPI_ISL_2658492, EPI_ISL_2658502, EPI_ISL_2658508, EPI_ISL_2658509, EPI_ISL_2658511                                                                                                                                                                                                                                                                                                                                                                                                                                                                                                                                                                                                                                                                                                                                                                                                                                                                                                                                                                                                                                                                                                                                                  | see above                                                  | Croatian Institute of Public Health                                                                                                        | Croatian Institute of Public Health                                                                                                                                                                                                                                                                                                                                                                                                                                                                                                                                                                                                                                                                                                                                                                                                                                                                                                                                                                                                                                               |
| EPI_ISL_2621143, EPI_ISL_3207535, EPI_ISL_3207536                                                                                                                                                                                                                                                                                                                                                                                                                                                                                                                                                                                                                                                                                                                                                                                                                                                                                                                                                                                                                                                                                                                                                                                                                                                        | D'Almeida Clinic wc DAL                                    | NHLS/UCT                                                                                                                                   | Arash Iranzadeh; Bruna Galvao; Carolyn Williamson; Deelan Doolabh; Diana Hardie; Gert Marais; Innocent Mudau; Lynn Tyers; Marvin Hsiao; Rageema Joseph; Stephen Korsman                                                                                                                                                                                                                                                                                                                                                                                                                                                                                                                                                                                                                                                                                                                                                                                                                                                                                                           |
| EPI_ISL_4459365                                                                                                                                                                                                                                                                                                                                                                                                                                                                                                                                                                                                                                                                                                                                                                                                                                                                                                                                                                                                                                                                                                                                                                                                                                                                                          | D.T. PROTACIO HOSPITAL                                     | Research Institute for Tropical Medicine/Tohoku University                                                                                 | Allen Anthony Laraño; Ariadne Ysabelle Dolor; Catalino Demetria; Clyde Dapata; Emmanuel Kagning Tsinda; Francisco Gerardo Polotan; Hitoshi Oshitani; Inez Andrea Medado; Jefferson Earl Halog; Lei Lanna Dancel; Leilanie Nacion; Ma. Angelica Tujan; Machiko Okamoto; Maria Carmen Corpuz; Mariko Siato-Obata; Mayuko Saito                                                                                                                                                                                                                                                                                                                                                                                                                                                                                                                                                                                                                                                                                                                                                      |
| EPI_ISL_4742264                                                                                                                                                                                                                                                                                                                                                                                                                                                                                                                                                                                                                                                                                                                                                                                                                                                                                                                                                                                                                                                                                                                                                                                                                                                                                          | DAVAO REGIONAL MEDICAL CENTER                              | Philippine Genome Center                                                                                                                   | Alethea R. de Guzman; Anna Ong-Lim; Arianne A. Zamora; Benedict A. Maralit; Carlo M. Lapid; Celia Carlos; Cynthia P. Saloma; Devon Ray Pacial; Diomedes A. Cariño; Edsel Maurice Salvana; El King D. Morado; Elcid Aaron R. Pangilinan; Eva Maria Cutiongco-de la Paz; Francis A. Tablizo; Henrietta Marie Rodriguez; Jaime C. Montoya; Jan Michael C. Yap; Jarvin E. Nipales; Jo-Hannah S. Llames; John Q. Wong; Joshua Gregor A. Dizon; Juan Antonio R. Magalang; Karol Sophia Agape R. Padilla; Kenneth M. Kim; Kris P. Punayan; Kristina Patriz Dela Cruz; Lindsay Claire D.L. Carandang; Ma. Exanil Plantig; Marc Edsel C. Ayes; Maria Rosario Singh-Vergeire; Maria Sofia L. Yangzon; Marielle M. Gamba; Marissa Alejandria; Niña Francesca Bustamante; Razel Nikka M. Hao; Renato Jacinto Q. Mantaring; Rianna Patricia S. Cruz; Sheila Mae M. Araiza; Yvonne Valerie Austria; Zipporah Mariebelle R. Enriquez; Zyrel V. Molljeon                                                                                                                                          |
| EPI_ISL_3354737, EPI_ISL_3354979, EPI_ISL_3355287                                                                                                                                                                                                                                                                                                                                                                                                                                                                                                                                                                                                                                                                                                                                                                                                                                                                                                                                                                                                                                                                                                                                                                                                                                                        | DC Public Health Lab/ Dept. of Forensic Sciences           | Centers for Disease Control and Prevention Division of Viral Diseases, Pathogen Discovery                                                  | Alex Burgin; Ben Rambo-Martin; Clinton Paden; Dakota Howard; Dave Wentworth; Dhwani Batra; Jasmine Padilla; Justin Lee; Krista Queen; Kristen Knipe; Kristine Lacey; Mark Burroughs; Matthew Schmerer; Meghan Bentz; Mili Sheth; Peter Cook; Sam Shepard; Sarah Nobles; Suxiang Tong; Vivien Dugan; Yvette Unoarumhi                                                                                                                                                                                                                                                                                                                                                                                                                                                                                                                                                                                                                                                                                                                                                              |
| EPI_ISL_2930629, EPI_ISL_3481998                                                                                                                                                                                                                                                                                                                                                                                                                                                                                                                                                                                                                                                                                                                                                                                                                                                                                                                                                                                                                                                                                                                                                                                                                                                                         | DC Public Health Lab/ Dept. of Forensic Sciences           | DC Public Health Lab/ Dept. of Forensic Sciences                                                                                           | Brittany Hamilton; Connie Maza; David Payne; Elizabeth Zelaya; Janis Doss; Jocelyn Hauser; Monica Mann; Sarah Scott; Scott Nguyen                                                                                                                                                                                                                                                                                                                                                                                                                                                                                                                                                                                                                                                                                                                                                                                                                                                                                                                                                 |
| EPI_ISL_3342336, EPI_ISL_3342347                                                                                                                                                                                                                                                                                                                                                                                                                                                                                                                                                                                                                                                                                                                                                                                                                                                                                                                                                                                                                                                                                                                                                                                                                                                                         | DGM Laboratory                                             | National Institute for Communicable Diseases of the National Health Laboratory Service                                                     | Amoako DG; Bhiman JN; Everatt J; Ismail A; Mahlangu B; Mnguni A; Mohale T; Ntuli N; Scheepers C                                                                                                                                                                                                                                                                                                                                                                                                                                                                                                                                                                                                                                                                                                                                                                                                                                                                                                                                                                                   |
| EPI_ISL_2662511, EPI_ISL_2662514, EPI_ISL_2662518, EPI_ISL_2662528, EPI_ISL_2662538, EPI_ISL_2662541, EPI_ISL_2662542, EPI_ISL_2662543, EPI_ISL_2662545, EPI_ISL_2662550                                                                                                                                                                                                                                                                                                                                                                                                                                                                                                                                                                                                                                                                                                                                                                                                                                                                                                                                                                                                                                                                                                                                 | see above                                                  | DR GEORGE MUKHARI LABORATORY                                                                                                               | National Institute for Communicable Diseases of the National Health Laboratory Service                                                                                                                                                                                                                                                                                                                                                                                                                                                                                                                                                                                                                                                                                                                                                                                                                                                                                                                                                                                            |
| EPI_ISL_2637832                                                                                                                                                                                                                                                                                                                                                                                                                                                                                                                                                                                                                                                                                                                                                                                                                                                                                                                                                                                                                                                                                                                                                                                                                                                                                          | DYNALAB                                                    | Department of Virology, Henri Mondor University Hospital, Assistance Publique Hôpitaux de Paris, Université Paris-Est Créteil, INSERM U955 | Alexandre Soulier; Christophe Rodriguez; Elisabeth Trawinsky; Guillaume Griocourt; Jean-Michel Pawlowsky; Melissa N'Debi; Slim Fourati; Vanessa Demontant                                                                                                                                                                                                                                                                                                                                                                                                                                                                                                                                                                                                                                                                                                                                                                                                                                                                                                                         |
| EPI_ISL_5552638, EPI_ISL_5556206, EPI_ISL_5556368                                                                                                                                                                                                                                                                                                                                                                                                                                                                                                                                                                                                                                                                                                                                                                                                                                                                                                                                                                                                                                                                                                                                                                                                                                                        | Davao International Airport Laboratory                     | Philippine Genome Center                                                                                                                   | Alethea R. de Guzman; Alyssa Joyce E. Telles; Anna Ong-Lim; Arianne A. Zamora; Benedict A. Maralit; Carlo M. Lapid; Celia Carlos; Cynthia P. Saloma; Devon Ray Pacial; Diomedes A. Cariño; Edsel Maurice Salvana; El King D. Morado; Elcid Aaron R. Pangilinan; Eva Maria Cutiongco-de la Paz; Francis A. Tablizo; Henrietta Marie Rodriguez; Jaime C. Montoya; Jan Michael C. Yap; Jarvin E. Nipales; Jo-Hannah S. Llames; John Michael Egan; John Q. Wong; Joshua Gregor A. Dizon; Joshua Jose Endozo; Juan Antonio R. Magalang; Karol Sophia Agape R. Padilla; Kenneth M. Kim; Kris P. Punayan; Kristina Patriz Dela Cruz; Lindsay Clare D.L. Carandang; Ma. Exanil Plantig; Marc Edsel C. Ayes; Maria Rosario Singh-Vergeire; Maria Sofia L. Yangzon; Marielle M. Gamba; Marissa Alejandria; Niña Francesca Bustamante; Razel Nikka M. Hao; Renato Jacinto Q. Mantaring; Rianna Patricia S. Cruz; Sheila Mae M. Araiza; Yvonne Valerie Austria; Zipporah Mariebelle R. Enriquez; Zyrel V. Molljeon                                                                            |
| EPI_ISL_4712031, EPI_ISL_4742095, EPI_ISL_4742156, EPI_ISL_4742241, EPI_ISL_5541113, EPI_ISL_5541117, EPI_ISL_5541237, EPI_ISL_5541488, EPI_ISL_5543291, EPI_ISL_5543305, EPI_ISL_5543958, EPI_ISL_5544033, EPI_ISL_5544085, EPI_ISL_5544104, EPI_ISL_5544115, EPI_ISL_5545273, EPI_ISL_5568944, EPI_ISL_5569796, EPI_ISL_5570185, EPI_ISL_5570263                                                                                                                                                                                                                                                                                                                                                                                                                                                                                                                                                                                                                                                                                                                                                                                                                                                                                                                                                       | see above                                                  | Davao One World Diagnostic Center Incorporated                                                                                             | Philippine Genome Center                                                                                                                                                                                                                                                                                                                                                                                                                                                                                                                                                                                                                                                                                                                                                                                                                                                                                                                                                                                                                                                          |
| EPI_ISL_4630042, EPI_ISL_4712045, EPI_ISL_4712050, EPI_ISL_4712089, EPI_ISL_4712115, EPI_ISL_4712175, EPI_ISL_4713056, EPI_ISL_4713115, EPI_ISL_4713185, EPI_ISL_4713358, EPI_ISL_4713359, EPI_ISL_4713411, EPI_ISL_4713472, EPI_ISL_4713495, EPI_ISL_4713571, EPI_ISL_4713588, EPI_ISL_4713607, EPI_ISL_4713631, EPI_ISL_4713673, EPI_ISL_4713689, EPI_ISL_4714716, EPI_ISL_4714745, EPI_ISL_4714757, EPI_ISL_4714810, EPI_ISL_4714840, EPI_ISL_4714896, EPI_ISL_4714981, EPI_ISL_4715039, EPI_ISL_4715098, EPI_ISL_4715102, EPI_ISL_4715154, EPI_ISL_4715188, EPI_ISL_4715262, EPI_ISL_4715295, EPI_ISL_4715299, EPI_ISL_4714146, EPI_ISL_4741532, EPI_ISL_4742076, EPI_ISL_4742081, EPI_ISL_4742101, EPI_ISL_4742113, EPI_ISL_4742119, EPI_ISL_4742153, EPI_ISL_4742199, EPI_ISL_4742262, EPI_ISL_4742208, EPI_ISL_4742224, EPI_ISL_4742232, EPI_ISL_4742237, EPI_ISL_4742237, EPI_ISL_4742252, EPI_ISL_4742259, EPI_ISL_4742261, EPI_ISL_5537755, EPI_ISL_5538200, EPI_ISL_5538278, EPI_ISL_5538406, EPI_ISL_5538460, EPI_ISL_5539111, EPI_ISL_5539563, EPI_ISL_5543244, EPI_ISL_5543263, EPI_ISL_5543269, EPI_ISL_5543272, EPI_ISL_5544106, EPI_ISL_5552481, EPI_ISL_5552589, EPI_ISL_5556179, EPI_ISL_5556255, EPI_ISL_5558783, EPI_ISL_5558804, EPI_ISL_5570047, EPI_ISL_5570620, EPI_ISL_5587743 | see above                                                  | Davao Regional Medical Center                                                                                                              | Philippine Genome Center                                                                                                                                                                                                                                                                                                                                                                                                                                                                                                                                                                                                                                                                                                                                                                                                                                                                                                                                                                                                                                                          |
| EPI_ISL_5934991, EPI_ISL_6540246, EPI_ISL_6540259                                                                                                                                                                                                                                                                                                                                                                                                                                                                                                                                                                                                                                                                                                                                                                                                                                                                                                                                                                                                                                                                                                                                                                                                                                                        | Davao de Oro Provincial Hospital- Montevista               | Philippine Genome Center Mindanao                                                                                                          | Anna Jessa Carnicer; April Mae Numeron; Chad Barrete; Charmen Mae Cava; Cheelvin Rey Maglasang; Giovanna Fae R. Oguis; Hanani Ramos; Homer Sajonia II; Ineke Knot; Jessa Marie Guliban; Joan T. Acaso; Kahili Corazo; Lyre Anni E. Mura; Megan Balders; Michael G. Bacus; Nerilyn B. Kunnang; Paul Lorenzo A. Gait; Quoelen Xandra Benar; Rannie John Diano; Renalyn SeNoran; Renalyn SeNoran; Ritchie Mae T. Gamot                                                                                                                                                                                                                                                                                                                                                                                                                                                                                                                                                                                                                                                               |
| EPI_ISL_3342402, EPI_ISL_3342411                                                                                                                                                                                                                                                                                                                                                                                                                                                                                                                                                                                                                                                                                                                                                                                                                                                                                                                                                                                                                                                                                                                                                                                                                                                                         | De Aar Laboratory                                          | National Institute for Communicable Diseases of the National Health Laboratory Service                                                     | Amoako DG; Bhiman JN; Everatt J; Ismail A; Mahlangu B; Mnguni A; Mohale T; Ntuli N; Scheepers C                                                                                                                                                                                                                                                                                                                                                                                                                                                                                                                                                                                                                                                                                                                                                                                                                                                                                                                                                                                   |
| EPI_ISL_5524603                                                                                                                                                                                                                                                                                                                                                                                                                                                                                                                                                                                                                                                                                                                                                                                                                                                                                                                                                                                                                                                                                                                                                                                                                                                                                          | De Aar Municipal Clinic                                    | NHLS/UCT                                                                                                                                   | Arash Iranzadeh; Bruna Galvao; Carolyn Williamson; Deelan Doolabh; Diana Hardie; Innocent Mudau; Lynn Tyers; Marvin Hsiao; Rageema Joseph; Stephen Korsman                                                                                                                                                                                                                                                                                                                                                                                                                                                                                                                                                                                                                                                                                                                                                                                                                                                                                                                        |
| EPI_ISL_2648206, EPI_ISL_5503095                                                                                                                                                                                                                                                                                                                                                                                                                                                                                                                                                                                                                                                                                                                                                                                                                                                                                                                                                                                                                                                                                                                                                                                                                                                                         | Debswana Orapa Mine Hospital Laboratory                    | Botswana Harvard HIV Reference Laboratory                                                                                                  | Boitumelo J. L. Zuze; Boitumelo Zuze; Botshelo Radibe; Dorcas Maruapula; Joseph Makhema; Keoratlhe Ntshambiwa; Kgamoletso Mosisi; Koketso Motwane; Legodile Koepel; Lesedi Magama; Letsi boggo Gaoralwe; Madisa Mine; Mosepele Mosepele; Mphaphi B. Mbulawa; Mpo Molapisi; Ontlametse T. Bareng; Pamela Smith-Lawrence; Roger Shapiro; Sefetogi Ramoagala; Shahn Lockman; Sikhulile Moyo; Simani Gasetlwi; Thela Tefelo; Thongbotho Mphoyakgosi; Wonderful T. Choga                                                                                                                                                                                                                                                                                                                                                                                                                                                                                                                                                                                                               |









|                                                                                                                                                                                                                                                                                                                                                                                                                                                                                                                                                                                                                                                                                                                                                                                                                                                                                                                                                                       |                                                                                                              |                                                                                                                                                                                                                                                                                                                                                                                                                                                                                                                                                                                                                                                                                                                                                                                                                             |                                                                                                                                                                                                                                                                                                                                                                                                                                                                                                                                                                                                                                            |
|-----------------------------------------------------------------------------------------------------------------------------------------------------------------------------------------------------------------------------------------------------------------------------------------------------------------------------------------------------------------------------------------------------------------------------------------------------------------------------------------------------------------------------------------------------------------------------------------------------------------------------------------------------------------------------------------------------------------------------------------------------------------------------------------------------------------------------------------------------------------------------------------------------------------------------------------------------------------------|--------------------------------------------------------------------------------------------------------------|-----------------------------------------------------------------------------------------------------------------------------------------------------------------------------------------------------------------------------------------------------------------------------------------------------------------------------------------------------------------------------------------------------------------------------------------------------------------------------------------------------------------------------------------------------------------------------------------------------------------------------------------------------------------------------------------------------------------------------------------------------------------------------------------------------------------------------|--------------------------------------------------------------------------------------------------------------------------------------------------------------------------------------------------------------------------------------------------------------------------------------------------------------------------------------------------------------------------------------------------------------------------------------------------------------------------------------------------------------------------------------------------------------------------------------------------------------------------------------------|
| EPI_ISL_2876989, EPI_ISL_3207493, EPI_ISL_3207533, EPI_ISL_3506426, EPI_ISL_3506431, EPI_ISL_3506432, EPI_ISL_3506434, EPI_ISL_3690576, EPI_ISL_3957777, EPI_ISL_3957796, EPI_ISL_3957808, EPI_ISL_4884455, EPI_ISL_5195382, EPI_ISL_5524585, EPI_ISL_5524646, EPI_ISL_5524647, EPI_ISL_5524656                                                                                                                                                                                                                                                                                                                                                                                                                                                                                                                                                                                                                                                                       | see above                                                                                                    | Groote Schuur Hospital wc GSH<br>NHLS/UJCT                                                                                                                                                                                                                                                                                                                                                                                                                                                                                                                                                                                                                                                                                                                                                                                  | Arash Iranzadeh; Bruna Galvao; Carolyn Williamson; Deelan Doolabh; Diana Hardie; Gert Marais; Innocent Mudau; Kruger Marais; Lynn Tyers; Marvin Hsiao; Rageema Joseph; Sisonke; Stephen Korsman                                                                                                                                                                                                                                                                                                                                                                                                                                            |
| EPI_ISL_2547373, EPI_ISL_2547374, EPI_ISL_2547375, EPI_ISL_2547377, EPI_ISL_2547378, EPI_ISL_2547379, EPI_ISL_2547380, EPI_ISL_2547381, EPI_ISL_2547382, EPI_ISL_2547383, EPI_ISL_2547384, EPI_ISL_2547386, EPI_ISL_2547388, EPI_ISL_2547389, EPI_ISL_2547392, EPI_ISL_2547393, EPI_ISL_2547396, EPI_ISL_2547398, EPI_ISL_2547399, EPI_ISL_2547403, EPI_ISL_2547405, EPI_ISL_2547406, EPI_ISL_2547418, EPI_ISL_2547419, EPI_ISL_2547424, EPI_ISL_2547425                                                                                                                                                                                                                                                                                                                                                                                                                                                                                                              | see above                                                                                                    | Groote Schuur Hospital wc GSH<br>National Health Laboratory Service/University of Cape Town (NHLS/UJCT)                                                                                                                                                                                                                                                                                                                                                                                                                                                                                                                                                                                                                                                                                                                     | Arash Iranzadeh; Bruna Galvao; Carolyn Williamson; Deelan Doolabh; Diana Hardie; Gert Marais; Innocent Mudau; Lynn Tyers; Marvin Hsiao; Stephen Korsman                                                                                                                                                                                                                                                                                                                                                                                                                                                                                    |
| EPI_ISL_2451662, EPI_ISL_3355171                                                                                                                                                                                                                                                                                                                                                                                                                                                                                                                                                                                                                                                                                                                                                                                                                                                                                                                                      | Guam Public Health Laboratory                                                                                | Centers for Disease Control and Prevention Division of Viral Diseases, Pathogen Discovery                                                                                                                                                                                                                                                                                                                                                                                                                                                                                                                                                                                                                                                                                                                                   | Alex Burgin; Alison Laufer Halpin; Ben L. Rambo-Martin; Ben Rambo-Martin; Clinton Paden; Clinton R. Paden; Dakota Howard; Darlene Wagner; Dave Wentworth; Dhvani Batra; Jasmine Padilla; Justin Lee; Katie Dillon; Krista Queen; Kristen Knipe; Kristine Lacek; Mark Burroughs; Matthew Schmerer; Meghan Bentz; Mili Sheth; Peter Cook; Sam Shepard; Sarah Nobles; Shoshona Le; Suxiang Tong; Vivien Dugan; Yvette Unoarumhi                                                                                                                                                                                                               |
| EPI_ISL_2375983, EPI_ISL_2376256                                                                                                                                                                                                                                                                                                                                                                                                                                                                                                                                                                                                                                                                                                                                                                                                                                                                                                                                      | Guguletu CHC wc GDH<br>Gundersen Clinical Microbiology Laboratory                                            | NHLS/UJCT<br>Kabara Cancer Research Institute                                                                                                                                                                                                                                                                                                                                                                                                                                                                                                                                                                                                                                                                                                                                                                               | Arash Iranzadeh; Bruna Galvao; Carolyn Williamson; Deelan Doolabh; Diana Hardie; Innocent Mudau; Kruger Marais; Lynn Tyers; Marvin Hsiao; Stephen Korsman<br>Craig S. Richmond; Paraic A. Kenny                                                                                                                                                                                                                                                                                                                                                                                                                                            |
| EPI_ISL_2445776, EPI_ISL_3204875                                                                                                                                                                                                                                                                                                                                                                                                                                                                                                                                                                                                                                                                                                                                                                                                                                                                                                                                      | H Braga<br>H Divino Espirito Santo - Ponta Delgada                                                           | Instituto Nacional de Saude (INSA)<br>Instituto Nacional de Saude (INSA) and Institute of Biomedicine (iBiMed), Universidade de Aveiro                                                                                                                                                                                                                                                                                                                                                                                                                                                                                                                                                                                                                                                                                      | Borges et al<br>Borges et al                                                                                                                                                                                                                                                                                                                                                                                                                                                                                                                                                                                                               |
| EPI_ISL_2895237, EPI_ISL_4459397, EPI_ISL_4459420                                                                                                                                                                                                                                                                                                                                                                                                                                                                                                                                                                                                                                                                                                                                                                                                                                                                                                                     | H Evora<br>H.M. CORACHEA GENERAL HOSPITAL                                                                    | Instituto Nacional de Saude (INSA)<br>Research Institute for Tropical Medicine/Tohoku University                                                                                                                                                                                                                                                                                                                                                                                                                                                                                                                                                                                                                                                                                                                            | Borges et al<br>Allen Anthony Laraño; Ardiane Ysabelle Dolor; Catalino Demetria; Clyde Daput; Emmanuel Kagning Tsinda; Francisco Gerardo Polotan; Hitoshi Oshitani; Inez Andrea Medado; Jefferson Earl Halog; Lei Lanna Dancel; Leilanie Nacion; Ma. Angelica Tujan; Machiko Okamoto; Maria Carmen Corpuz; Mariko Siato-Obata; Mayuko Saito                                                                                                                                                                                                                                                                                                |
| EPI_ISL_2629002, EPI_ISL_2629011, EPI_ISL_2629032, EPI_ISL_2629043, EPI_ISL_2629044, EPI_ISL_2629057, EPI_ISL_2629061, EPI_ISL_2629063, EPI_ISL_2629065, EPI_ISL_2629088, EPI_ISL_2629089, EPI_ISL_2629090, EPI_ISL_2629109, EPI_ISL_2629117, EPI_ISL_2629155                                                                                                                                                                                                                                                                                                                                                                                                                                                                                                                                                                                                                                                                                                         | see above<br>HEGP - Laboratoire de Virologie                                                                 | HEGP - Laboratoire de Virologie                                                                                                                                                                                                                                                                                                                                                                                                                                                                                                                                                                                                                                                                                                                                                                                             | David Veyer; Hélène Pére; Julien Puech; Maxime Wack; Nicolas Robillard; Sandrine Imbeaud                                                                                                                                                                                                                                                                                                                                                                                                                                                                                                                                                   |
| EPI_ISL_2695590, EPI_ISL_2695606, EPI_ISL_2695732, EPI_ISL_2709863, EPI_ISL_2709872, EPI_ISL_2709875, EPI_ISL_2709878, EPI_ISL_2709885                                                                                                                                                                                                                                                                                                                                                                                                                                                                                                                                                                                                                                                                                                                                                                                                                                | see above<br>HELEN JOSEPH                                                                                    | National Institute for Communicable Diseases of the National Health Laboratory Service                                                                                                                                                                                                                                                                                                                                                                                                                                                                                                                                                                                                                                                                                                                                      | Amoako DG; Bhiman JN; Everatt J; Ismail A; Mahlangu B; Mnguni A; Mohale T; Ntuli N; Scheepers C                                                                                                                                                                                                                                                                                                                                                                                                                                                                                                                                            |
| EPI_ISL_2827076, EPI_ISL_2827084, EPI_ISL_2827104, EPI_ISL_2827118, EPI_ISL_2827119, EPI_ISL_2827127, EPI_ISL_2942285, EPI_ISL_4253622, EPI_ISL_4253623                                                                                                                                                                                                                                                                                                                                                                                                                                                                                                                                                                                                                                                                                                                                                                                                               | see above<br>HELEN JOSEPH LABORATORY                                                                         | National Institute for Communicable Diseases of the National Health Laboratory Service                                                                                                                                                                                                                                                                                                                                                                                                                                                                                                                                                                                                                                                                                                                                      | Amoako DG; Bhiman JN; Everatt J; Ismail A; Mahlangu B; Mnguni A; Mohale T; Ntuli N; Scheepers C                                                                                                                                                                                                                                                                                                                                                                                                                                                                                                                                            |
| EPI_ISL_2385219, EPI_ISL_2523862                                                                                                                                                                                                                                                                                                                                                                                                                                                                                                                                                                                                                                                                                                                                                                                                                                                                                                                                      | HELIX LLC                                                                                                    | WHO National Influenza Centre Russian Federation                                                                                                                                                                                                                                                                                                                                                                                                                                                                                                                                                                                                                                                                                                                                                                            | Andrey Komissarov; Artem Fadeev; Daria Danilenko; Dmitry Lioznov; Elena Nabieva; Georgii Bazynkin; Kirill Varchenko; Ksenia Safina; Kseniya Komissarova; Maria Pisareva; Maria Timofeeva; Mikhail Bakeev; Nikita Yolshin; Oula Mansour; Oula Masour; Tamila Musaeva; Veronika Eder                                                                                                                                                                                                                                                                                                                                                         |
| EPI_ISL_2484760, EPI_ISL_2484763, EPI_ISL_2484772, EPI_ISL_2484775, EPI_ISL_2484777, EPI_ISL_2484778, EPI_ISL_2484780, EPI_ISL_2484781, EPI_ISL_2484782, EPI_ISL_2484783, EPI_ISL_2484785, EPI_ISL_2484790, EPI_ISL_2484793, EPI_ISL_2484794, EPI_ISL_2484795, EPI_ISL_2600361, EPI_ISL_2600363, EPI_ISL_2600364                                                                                                                                                                                                                                                                                                                                                                                                                                                                                                                                                                                                                                                      | see above<br>HOME QUARANTINE TASKFORCE                                                                       | Hong Kong Department of Health                                                                                                                                                                                                                                                                                                                                                                                                                                                                                                                                                                                                                                                                                                                                                                                              | Alan K.L. Tsang; Dominic N.C. Tsang; Edman T.K. Lam; Gannon C.K. Mak; Ken H.L. Ng; Peter C.W. Yip; Peter K.C. Cheng; Rickjason C.W. Chan                                                                                                                                                                                                                                                                                                                                                                                                                                                                                                   |
| EPI_ISL_2482829                                                                                                                                                                                                                                                                                                                                                                                                                                                                                                                                                                                                                                                                                                                                                                                                                                                                                                                                                       | HOPITAL ALBI                                                                                                 | CNR Virus des Infections Respiratoires - France SUD                                                                                                                                                                                                                                                                                                                                                                                                                                                                                                                                                                                                                                                                                                                                                                         | Antonin Bal; Bruno Lina; Bruno Simon; Gregory Destras; Gwendolyne Burfin; Hadrien Regue; Laurence Josset; Martine Valette; Quentin Semanas                                                                                                                                                                                                                                                                                                                                                                                                                                                                                                 |
| EPI_ISL_2464508, EPI_ISL_2464521                                                                                                                                                                                                                                                                                                                                                                                                                                                                                                                                                                                                                                                                                                                                                                                                                                                                                                                                      | HOPITAL EMILE ROUX                                                                                           | Department of Virology, Henri Mondor University Hospital, Assistance Publique Hôpitaux de Paris, Université Paris-Est Créteil, INSERM U955                                                                                                                                                                                                                                                                                                                                                                                                                                                                                                                                                                                                                                                                                  | Alexandre Soulier; Christophe Rodriguez; Elisabeth Trawinski; Guillaume Gricourt; Jean-Michel Pawlotsky; Melissa N'Debi; Slim Fourati; Vanessa Demontant                                                                                                                                                                                                                                                                                                                                                                                                                                                                                   |
| EPI_ISL_2482799                                                                                                                                                                                                                                                                                                                                                                                                                                                                                                                                                                                                                                                                                                                                                                                                                                                                                                                                                       | HOPITAL SAINT ANDRE                                                                                          | CNR Virus des Infections Respiratoires - France SUD                                                                                                                                                                                                                                                                                                                                                                                                                                                                                                                                                                                                                                                                                                                                                                         | Antonin Bal; Bruno Lina; Bruno Simon; Gregory Destras; Gwendolyne Burfin; Hadrien Regue; Laurence Josset; Martine Valette; Quentin Semanas                                                                                                                                                                                                                                                                                                                                                                                                                                                                                                 |
| EPI_ISL_2710196, EPI_ISL_4601273                                                                                                                                                                                                                                                                                                                                                                                                                                                                                                                                                                                                                                                                                                                                                                                                                                                                                                                                      | HOSPITAL CAN MISSES<br>HOSPITAL GENERAL LA MANCHA CENTRO                                                     | HOSPITAL UNIVERSITARIO SON ESPASES<br>Instituto de Salud Carlos III                                                                                                                                                                                                                                                                                                                                                                                                                                                                                                                                                                                                                                                                                                                                                         | Hospital Universitario Son Espases; Servicio de Microbiología<br>A. Monzón; F. Casas; I. Jiménez; I.GAITAN PITERA; JORGE; M. Sandonis; P. Zaballos; S. Cuesta; S. Iglesias-Caballero; S. Pozo; S. Varona; V. Camarero; Vázquez-Morón                                                                                                                                                                                                                                                                                                                                                                                                       |
| EPI_ISL_3260829, EPI_ISL_5433761, EPI_ISL_3502567, EPI_ISL_3502636, EPI_ISL_3502730, EPI_ISL_3502735, EPI_ISL_3532479, EPI_ISL_4205909                                                                                                                                                                                                                                                                                                                                                                                                                                                                                                                                                                                                                                                                                                                                                                                                                                | HOSPITAL J.M. MORALES MESEGUER<br>HOSPITAL UNIVERSITARI DE BELLVITGE<br>HOSPITAL UNIVERSITARIO 12 DE OCTUBRE | Instituto de Salud Carlos III<br>Microbiology Department<br>HOSPITAL UNIVERSITARIO 12 DE OCTUBRE                                                                                                                                                                                                                                                                                                                                                                                                                                                                                                                                                                                                                                                                                                                            | A. Monzón; F. Casas; I. Jiménez; I.ANTEQUERA RODRIGUEZ; M. Sandonis; P. Zaballos; PEDRO; S. Cuesta; S. Iglesias-Caballero; S. Pozo; S. Varona; V. Camarero; Vázquez-Morón<br>Aida Gonzalez-Diaz; Carmen Ardanuy; Jordi Camara; Jordi Niubó; Laura Calatayud; M Angeles Domínguez; Sara Marti; Yolanda Hernandez<br>Carmen Martín-Higuera; Esther Viedma; Irene Muñoz-Gallego; M.ª Dolores Folgueira; Mar Aguilera; Noelia Moral; Rafael Delgado; Sagrario Zurita                                                                                                                                                                           |
| EPI_ISL_2626175                                                                                                                                                                                                                                                                                                                                                                                                                                                                                                                                                                                                                                                                                                                                                                                                                                                                                                                                                       | HOSPITAL UNIVERSITARIO SON ESPASES                                                                           | HOSPITAL UNIVERSITARIO SON ESPASES                                                                                                                                                                                                                                                                                                                                                                                                                                                                                                                                                                                                                                                                                                                                                                                          | Hospital Universitario Son Espases; Servicio de Microbiología                                                                                                                                                                                                                                                                                                                                                                                                                                                                                                                                                                              |
| EPI_ISL_4425308, EPI_ISL_4425310, EPI_ISL_4601290, EPI_ISL_4601291, EPI_ISL_5967174                                                                                                                                                                                                                                                                                                                                                                                                                                                                                                                                                                                                                                                                                                                                                                                                                                                                                   | HOSPITAL VIRGEN DE LA SALUD DE TOLEDO                                                                        | Instituto de Salud Carlos III                                                                                                                                                                                                                                                                                                                                                                                                                                                                                                                                                                                                                                                                                                                                                                                               | A. Monzón; EVA; F. Casas; I. HEREDERO GALVEZ; I. Jiménez; I.HEREDERO GALVEZ; Iglesias-Caballero; M. Camarero; M. Sandonis; P. Zaballos; S. Camarero; S. Cuesta; S. Iglesias-Caballero; S. Pozo; S. Varona; Sandonis; V. Vázquez-Morón                                                                                                                                                                                                                                                                                                                                                                                                      |
| EPI_ISL_2375982, EPI_ISL_4273911                                                                                                                                                                                                                                                                                                                                                                                                                                                                                                                                                                                                                                                                                                                                                                                                                                                                                                                                      | Hanover Park CHC wc HPH<br>Haugesund Hospital, laboratory for Medical Microbiology                           | NHLS/UJCT<br>Norwegian Institute of Public Health, Department of Virology                                                                                                                                                                                                                                                                                                                                                                                                                                                                                                                                                                                                                                                                                                                                                   | Arash Iranzadeh; Bruna Galvao; Carolyn Williamson; Deelan Doolabh; Diana Hardie; Innocent Mudau; Kruger Marais; Lynn Tyers; Marvin Hsiao; Stephen Korsman<br>Atiya R Ali; Debech Nadia; Engebretsen Serina Beate; Garcia Llorente Ignacio; Hilde Elishaug; Hilde Vollan; Jon Bråte; Kamilla Heddeland Instefjord; Karoline Bragstad; Kathrine Stene-Johansen; Line Victoria Moen; Marie Paulsen Madsen; Olav Hungenes; Pedersen Benedikte Nevjen; Rasmus Riis Kopperud                                                                                                                                                                     |
| EPI_ISL_2436953, EPI_ISL_2437088, EPI_ISL_2437128, EPI_ISL_4884456, EPI_ISL_3207501, EPI_ISL_4816948                                                                                                                                                                                                                                                                                                                                                                                                                                                                                                                                                                                                                                                                                                                                                                                                                                                                  | Health Services Laboratories<br>Heidelberg Clinic wc HBC<br>Heideveld CDC wc HVP                             | Wellcome Sanger Institute for the COVID-19 Genomics UK (COG-UK) Consortium<br>NHLS/UJCT<br>NHLS/UJCT                                                                                                                                                                                                                                                                                                                                                                                                                                                                                                                                                                                                                                                                                                                        | Cordelia Langford; David K. Jackson; Dominic Kwiatkowski; Ewan Harrison; Health Services Laboratories and Alex Alderton; Ian Johnston; Jeffrey Barrett; John Sillitoe on behalf of the Wellcome Sanger Institute COVID-19 Surveillance Team; Roberto Amato; Sonia Goncalves<br>Arash Iranzadeh; Bruna Galvao; Carolyn Williamson; Deelan Doolabh; Diana Hardie; Gert Marais; Innocent Mudau; Lynn Tyers; Marvin Hsiao; Rageema Joseph; Stephen Korsman<br>Arash Iranzadeh; Bruna Galvao; Carolyn Williamson; Deelan Doolabh; Diana Hardie; Gert Marais; Innocent Mudau; Lynn Tyers; Marvin Hsiao; Rageema Joseph; Sisonke; Stephen Korsman |
| EPI_ISL_3506428, EPI_ISL_3506429, EPI_ISL_3690577, EPI_ISL_2375927, EPI_ISL_4816941, EPI_ISL_5195383                                                                                                                                                                                                                                                                                                                                                                                                                                                                                                                                                                                                                                                                                                                                                                                                                                                                  | Heideveld Emergency Centre<br>Helderberg Hospital wc HHH                                                     | NHLS/UJCT<br>NHLS/UJCT                                                                                                                                                                                                                                                                                                                                                                                                                                                                                                                                                                                                                                                                                                                                                                                                      | Arash Iranzadeh; Bruna Galvao; Carolyn Williamson; Deelan Doolabh; Diana Hardie; Gert Marais; Innocent Mudau; Lynn Tyers; Marvin Hsiao; Rageema Joseph; Stephen Korsman<br>Arash Iranzadeh; Bruna Galvao; Carolyn Williamson; Deelan Doolabh; Diana Hardie; Gert Marais; Innocent Mudau; Kruger Marais; Lynn Tyers; Marvin Hsiao; Rageema Joseph; Stephen Korsman                                                                                                                                                                                                                                                                          |
| EPI_ISL_2547372                                                                                                                                                                                                                                                                                                                                                                                                                                                                                                                                                                                                                                                                                                                                                                                                                                                                                                                                                       | Helderberg Hospital wc HHH                                                                                   | National Health Laboratory Service/University of Cape Town (NHLS/UJCT)                                                                                                                                                                                                                                                                                                                                                                                                                                                                                                                                                                                                                                                                                                                                                      | Arash Iranzadeh; Bruna Galvao; Carolyn Williamson; Deelan Doolabh; Diana Hardie; Gert Marais; Innocent Mudau; Lynn Tyers; Marvin Hsiao; Stephen Korsman                                                                                                                                                                                                                                                                                                                                                                                                                                                                                    |
| EPI_ISL_2367607, EPI_ISL_2440109, EPI_ISL_2440306, EPI_ISL_2598937, EPI_ISL_2599133, EPI_ISL_4345772, EPI_ISL_4345780, EPI_ISL_4345782, EPI_ISL_4345822, EPI_ISL_4345827, EPI_ISL_4345856, EPI_ISL_4345857, EPI_ISL_4345869, EPI_ISL_4345888, EPI_ISL_4345901, EPI_ISL_4345958, EPI_ISL_4345976, EPI_ISL_4346013, EPI_ISL_4346015, EPI_ISL_4346125, EPI_ISL_4346129, EPI_ISL_4346179, EPI_ISL_4346184, EPI_ISL_4346234, EPI_ISL_4346273, EPI_ISL_4346295, EPI_ISL_4346303, EPI_ISL_4346412, EPI_ISL_4346418, EPI_ISL_4346429, EPI_ISL_4346471, EPI_ISL_4346490, EPI_ISL_4346493, EPI_ISL_4346514, EPI_ISL_4346530, EPI_ISL_4346769, EPI_ISL_4346810, EPI_ISL_4346835, EPI_ISL_4346916, EPI_ISL_4346925, EPI_ISL_4347055, EPI_ISL_4347066, EPI_ISL_4347078, EPI_ISL_4347251, EPI_ISL_4347269, EPI_ISL_4347323, EPI_ISL_4347547, EPI_ISL_4347612, EPI_ISL_4347637, EPI_ISL_4347689, EPI_ISL_4347714, EPI_ISL_4961867, EPI_ISL_4961991, EPI_ISL_4962180, EPI_ISL_4962224 | Centers for Disease Control and Prevention Division of Viral Diseases, Pathogen Discovery                    | Adrian Pasksey; Alexandre Bolze; Ary Ascencio; Benjamin Rambo-Martin; Brad Sickler; Charlotte Rivera-Garcia; Christine Tran; Christopher Gulvick; Chrstine Tran; Clinton Paden; Clinton R. Paden; Dakota Howard; Darlene Wagner; David Becker; Dhvani Batra; Duncan MacCannell; Efrén Sandovál; Eileen De Feo; Eileen de Feo; Elizabeth Cirilli; Eric Allen; Geraint Levan; James Lu; Jan Antico; Jason Caravas; Jason Nguyen; Jimmy Ramirez; Jingtao Liu; Kara Moser; Kelly Barrett; Kelly Schiabor Barrett; Kim Gietzen; Kristine Lacek; Magnus Isaksson; Marc Laurent; Matthew Schmerer; Tolentino; Nicole L. Washington; Nicole Washington; Peter Cook; Peter W. Cook; Phil Febbo; Ryan Cho; Scott Sammons; Shannon Wickline; Shatavia Morrison; Sherry Wang; Simon White; Tyler Cassens; William Lee; Yvette Unoarumhi |                                                                                                                                                                                                                                                                                                                                                                                                                                                                                                                                                                                                                                            |
| EPI_ISL_2464414                                                                                                                                                                                                                                                                                                                                                                                                                                                                                                                                                                                                                                                                                                                                                                                                                                                                                                                                                       | Hellenic National Blood Transfusion Center - EKEA                                                            | Greek Genome Center, Biomedical Research Foundation of the Academy of Athens (BRFAA)                                                                                                                                                                                                                                                                                                                                                                                                                                                                                                                                                                                                                                                                                                                                        | Dimitrios Thanos; Eftimia Petinaki; Emmanouil Athanasiadis; Giannis Vatsellas; Katerina Zoi; Kostas Stamoulis; Theodoros Loupis                                                                                                                                                                                                                                                                                                                                                                                                                                                                                                            |
| EPI_ISL_2365047, EPI_ISL_2365080                                                                                                                                                                                                                                                                                                                                                                                                                                                                                                                                                                                                                                                                                                                                                                                                                                                                                                                                      | Hellenic National Blood Transfusion Center - EKEA                                                            | Greek Genome Center, Biomedical Research Foundation of the Academy of Athens (BRFAA)                                                                                                                                                                                                                                                                                                                                                                                                                                                                                                                                                                                                                                                                                                                                        | Dimitrios Thanos; Eftimia Petinaki; Emmanouil Athanasiadis; Giannis Vatsellas; Katerina Zoi; Kostas Stamoulis; Theodoros Loupis                                                                                                                                                                                                                                                                                                                                                                                                                                                                                                            |
| EPI_ISL_5195440                                                                                                                                                                                                                                                                                                                                                                                                                                                                                                                                                                                                                                                                                                                                                                                                                                                                                                                                                       | Hermanus Hospital wc HER                                                                                     | NHLS/UJCT                                                                                                                                                                                                                                                                                                                                                                                                                                                                                                                                                                                                                                                                                                                                                                                                                   | Arash Iranzadeh; Bruna Galvao; Carolyn Williamson; Deelan Doolabh; Diana Hardie; Gert Marais; Innocent Mudau; Lynn Tyers; Marvin Hsiao; Rageema Joseph; Stephen Korsman                                                                                                                                                                                                                                                                                                                                                                                                                                                                    |

|                                                                                                                                                                                                                                                                                                                                                                                                                                                                                                                                                                                                                                                                                                                                                                                                                                                                                                                                                                                                                                                                                                                                                                                                                                      |                                                                                                           |                                     |                                                                                                                                                                                                                                                                                                                                                                                                                                                                                                                                                                                                                                                                                                                                                                                                                                                                                                                                         |                                                                                                                                                                                                                                                                                                                                                                                                                                                                                                                                                                                                                                                                                                                                                                                                                                                                                                                                                                                                                                                                                                                                                                                                                                         |
|--------------------------------------------------------------------------------------------------------------------------------------------------------------------------------------------------------------------------------------------------------------------------------------------------------------------------------------------------------------------------------------------------------------------------------------------------------------------------------------------------------------------------------------------------------------------------------------------------------------------------------------------------------------------------------------------------------------------------------------------------------------------------------------------------------------------------------------------------------------------------------------------------------------------------------------------------------------------------------------------------------------------------------------------------------------------------------------------------------------------------------------------------------------------------------------------------------------------------------------|-----------------------------------------------------------------------------------------------------------|-------------------------------------|-----------------------------------------------------------------------------------------------------------------------------------------------------------------------------------------------------------------------------------------------------------------------------------------------------------------------------------------------------------------------------------------------------------------------------------------------------------------------------------------------------------------------------------------------------------------------------------------------------------------------------------------------------------------------------------------------------------------------------------------------------------------------------------------------------------------------------------------------------------------------------------------------------------------------------------------|-----------------------------------------------------------------------------------------------------------------------------------------------------------------------------------------------------------------------------------------------------------------------------------------------------------------------------------------------------------------------------------------------------------------------------------------------------------------------------------------------------------------------------------------------------------------------------------------------------------------------------------------------------------------------------------------------------------------------------------------------------------------------------------------------------------------------------------------------------------------------------------------------------------------------------------------------------------------------------------------------------------------------------------------------------------------------------------------------------------------------------------------------------------------------------------------------------------------------------------------|
| EPI_ISL_6182088, EPI_ISL_6182089, EPI_ISL_6182090, EPI_ISL_6182091, EPI_ISL_6182092, EPI_ISL_6182093, EPI_ISL_6182094                                                                                                                                                                                                                                                                                                                                                                                                                                                                                                                                                                                                                                                                                                                                                                                                                                                                                                                                                                                                                                                                                                                | see above                                                                                                 | HerpeZ                              | HerpeZ                                                                                                                                                                                                                                                                                                                                                                                                                                                                                                                                                                                                                                                                                                                                                                                                                                                                                                                                  | Alimuddin Zumla; Edgar Simulundu; Franklyn Egbe Nkongho; John Tembo; Kangwa Mulonga; Kwitaka Maluzi; Le Thi Kieu Linh; Lloyd Mulenga; Matthew Bates; Moses Chilufya; Nathan Kapata; Prof. Dr. Thirumalaisamy P Velavan; Sivaramakrishna Rachakonda; Sombo Fwoloshi; Srinivas Reddy Pallerla; Victor Mukonka                                                                                                                                                                                                                                                                                                                                                                                                                                                                                                                                                                                                                                                                                                                                                                                                                                                                                                                             |
| EPI_ISL_2625632, EPI_ISL_2638048, EPI_ISL_2678283, EPI_ISL_2678284, EPI_ISL_2678285, EPI_ISL_2678287, EPI_ISL_2678288, EPI_ISL_2678289, EPI_ISL_2678290, EPI_ISL_2678291, EPI_ISL_2678292, EPI_ISL_2678294, EPI_ISL_2678297, EPI_ISL_2678299, EPI_ISL_2678301, EPI_ISL_2678303, EPI_ISL_2678304, EPI_ISL_2678305, EPI_ISL_2678306, EPI_ISL_2678308, EPI_ISL_2678309, EPI_ISL_2678312, EPI_ISL_2678313, EPI_ISL_2678314, EPI_ISL_2678316, EPI_ISL_2678318                                                                                                                                                                                                                                                                                                                                                                                                                                                                                                                                                                                                                                                                                                                                                                             | see above                                                                                                 | HerpeZ                              | Institute of Tropical Medicine                                                                                                                                                                                                                                                                                                                                                                                                                                                                                                                                                                                                                                                                                                                                                                                                                                                                                                          | Alimuddin Zumla; Edgar Simulundu; Franklyn Egbe Nkongho; John Tembo; Kangwa Mulonga; Kwitaka Maluzi; Le Thi Kieu Linh; Lloyd Mulenga; Matthew Bates; Moses Chilufya; Nathan Kapata; Prof. Dr. Thirumalaisamy P Velavan; Sivaramakrishna Rachakonda; Sombo Fwoloshi; Srinivas Reddy Pallerla; Victor Mukonka                                                                                                                                                                                                                                                                                                                                                                                                                                                                                                                                                                                                                                                                                                                                                                                                                                                                                                                             |
| EPI_ISL_2859981, EPI_ISL_2860008, EPI_ISL_2860028, EPI_ISL_2860105, EPI_ISL_2860164, EPI_ISL_4713618, EPI_ISL_4716525, EPI_ISL_5570775                                                                                                                                                                                                                                                                                                                                                                                                                                                                                                                                                                                                                                                                                                                                                                                                                                                                                                                                                                                                                                                                                               | see above                                                                                                 | Hi-Precision Diagnostic Center (QC) | Philippine Genome Center                                                                                                                                                                                                                                                                                                                                                                                                                                                                                                                                                                                                                                                                                                                                                                                                                                                                                                                | Alethea R. de Guzman; Alyssa Joyce E. Telles; Anna Ong-Lim; Arianne A. Zamora; Benedict A. Maralit; Carlo M. Lapid; Celia Carlos; Cynthia P. Saloma; Devon Ray Pacial; Diomedes A. Carino; Diomedes A. Cariño; Edsel Maurice Salvana; Edsel Maurice Salvaña; El King D. Morado; Elcid Aaron R. Pangllinan; Eva Maria Cutiongco-de la Paz; Francis A. Tablizo; Henrietta Marie Rodriguez; Jaime C. Montoya; Jan Michael C. Yap; Jarvin E. Nipales; Jo-Hannah S. Llames; John Michael Egana; John Q. Wong; Joshua Gregor A. Dizon; Joshua Jose Endozo; Juan Antonio R. Magalang; Karol Sophia Agape R. Padilla; Kenneth M. Kim; Kris P. Punayan; Kristina Patriz Dela Cruz; Kristina Patriz Dela Cruz; Lindsay Claire D.L. Carandang; Lindsay Claire D.L. Carandang; Ma. Exanil Planting; Marc Edsel C. Ayes; Maria Rosario Singh-Vergeire; Maria Rosario Singh-Vergeire and Cynthia P. Saloma; Maria Sofia L. Yangzon; Marielle M Gamboa; Marielle M. Gamboa; Marissa Alejandria; Nina Francesca Bustamante; Niña Francesca Bustamante; Razel Nikka M. Hao; Renato Jacinto Q. Mantaring; Rianna Patricia S. Cruz; Sheila Mae M. Araiza; Shiela Mae M. Araiza; Yvonne Valerie Austria; Zipporah Mariebelle R. Enriquez; Zryel V. Mollejon |
| EPI_ISL_2547352                                                                                                                                                                                                                                                                                                                                                                                                                                                                                                                                                                                                                                                                                                                                                                                                                                                                                                                                                                                                                                                                                                                                                                                                                      | Hondeklipbaai Clinic                                                                                      |                                     | National Health Laboratory Service/University of Cape Town (NHLS/UCT)                                                                                                                                                                                                                                                                                                                                                                                                                                                                                                                                                                                                                                                                                                                                                                                                                                                                   | Arash Iranzadeh; Bruna Galvao; Carolyn Williamson; Deelan Doolabh; Diana Hardie; Gert Marais; Innocent Mudau; Lynn Tyers; Marvin Hsiao; Stephen Korsman                                                                                                                                                                                                                                                                                                                                                                                                                                                                                                                                                                                                                                                                                                                                                                                                                                                                                                                                                                                                                                                                                 |
| EPI_ISL_2621096, EPI_ISL_2621107                                                                                                                                                                                                                                                                                                                                                                                                                                                                                                                                                                                                                                                                                                                                                                                                                                                                                                                                                                                                                                                                                                                                                                                                     | Hornlee Clinic wc HLC                                                                                     |                                     | NHLS/UCT                                                                                                                                                                                                                                                                                                                                                                                                                                                                                                                                                                                                                                                                                                                                                                                                                                                                                                                                | Arash Iranzadeh; Bruna Galvao; Carolyn Williamson; Deelan Doolabh; Diana Hardie; Gert Marais; Innocent Mudau; Lynn Tyers; Marvin Hsiao; Stephen Korsman                                                                                                                                                                                                                                                                                                                                                                                                                                                                                                                                                                                                                                                                                                                                                                                                                                                                                                                                                                                                                                                                                 |
| EPI_ISL_2547427                                                                                                                                                                                                                                                                                                                                                                                                                                                                                                                                                                                                                                                                                                                                                                                                                                                                                                                                                                                                                                                                                                                                                                                                                      | Hornlee Clinic wc HLC                                                                                     |                                     | National Health Laboratory Service/University of Cape Town (NHLS/UCT)                                                                                                                                                                                                                                                                                                                                                                                                                                                                                                                                                                                                                                                                                                                                                                                                                                                                   | Arash Iranzadeh; Bruna Galvao; Carolyn Williamson; Deelan Doolabh; Diana Hardie; Gert Marais; Innocent Mudau; Lynn Tyers; Marvin Hsiao; Stephen Korsman                                                                                                                                                                                                                                                                                                                                                                                                                                                                                                                                                                                                                                                                                                                                                                                                                                                                                                                                                                                                                                                                                 |
| EPI_ISL_2374189, EPI_ISL_2374190, EPI_ISL_2374191, EPI_ISL_2374446, EPI_ISL_2374453, EPI_ISL_2374474, EPI_ISL_2462953, EPI_ISL_2462956, EPI_ISL_2462957, EPI_ISL_2462958, EPI_ISL_2462959, EPI_ISL_2462960, EPI_ISL_2462961, EPI_ISL_2462962, EPI_ISL_2462963, EPI_ISL_2464081, EPI_ISL_2464082, EPI_ISL_2464088, EPI_ISL_2464089, EPI_ISL_2464242, EPI_ISL_2464248, EPI_ISL_2531827, EPI_ISL_2531855, EPI_ISL_2531859, EPI_ISL_2531864, EPI_ISL_2531868, EPI_ISL_2532312, EPI_ISL_2532313, EPI_ISL_2532315, EPI_ISL_2532388, EPI_ISL_2532394, EPI_ISL_2532395, EPI_ISL_2532396, EPI_ISL_2535271, EPI_ISL_2535272, EPI_ISL_2535274, EPI_ISL_2535474, EPI_ISL_2535555, EPI_ISL_2535559, EPI_ISL_2627948, EPI_ISL_2627953, EPI_ISL_2627954, EPI_ISL_2627955, EPI_ISL_2627961, EPI_ISL_2627963, EPI_ISL_2627975, EPI_ISL_2627976, EPI_ISL_2627978, EPI_ISL_2627993, EPI_ISL_2627994, EPI_ISL_2627995, EPI_ISL_2627996, EPI_ISL_2627997, EPI_ISL_2627998, EPI_ISL_2627999, EPI_ISL_2835742, EPI_ISL_2835843, EPI_ISL_2835844, EPI_ISL_2835845, EPI_ISL_2835908, EPI_ISL_2835909, EPI_ISL_2835910, EPI_ISL_2923116, EPI_ISL_2923166, EPI_ISL_3031656, EPI_ISL_3031913, EPI_ISL_3058231, EPI_ISL_3153383, EPI_ISL_3154732, EPI_ISL_3801685 | see above                                                                                                 | Hospital                            | National Reference Centre for Viruses of Respiratory Infections, Institut Pasteur, Paris<br>Agnès Scanvic; Alexandra Ducancelli; Alice Moisan; Amaury Vayssé; Angela Brisebarre; Axelle Paquin; Camille Capel; Christophe Malabat; Corinne Maufrais; CéCile Farrugia; CéLine Ramanantsoa; Damien Mornico; Emmanuelle Permal; Etienne Simon-Lorière; Franck Griscelli; Frédéric Lemoine; GUINARD Jérôme; Guillaume Aubin (G); Hub Bioinformatique Biostatistiques; Hub de Bioinformatique et Biostatistique; Hub de Bioinformatique et Statistique; Isabelle Woerzel; Jérôme Guinard; Laura Djamdjan; Louise Lefrançois; LéA Pilorge; Marianne Burgard; Marie-Christine Legrand-Quillien; Marie-Hélène Glaudon Louveau De La Guignery; Marion Barbet; Maud Vanpeene; Méline Bizard; Nabil Gastli; Odile Petsaris; Pascale Martres; Patrice Combe; Sylvie Behillil; Sylvie Van der Werf; Valérie Serazin; Victoire Baillet; Vincent Enouf |                                                                                                                                                                                                                                                                                                                                                                                                                                                                                                                                                                                                                                                                                                                                                                                                                                                                                                                                                                                                                                                                                                                                                                                                                                         |
| EPI_ISL_5428560                                                                                                                                                                                                                                                                                                                                                                                                                                                                                                                                                                                                                                                                                                                                                                                                                                                                                                                                                                                                                                                                                                                                                                                                                      | Hospital Canselor Tuanku Muhriz UKM                                                                       |                                     | Malaysia Genome Institute                                                                                                                                                                                                                                                                                                                                                                                                                                                                                                                                                                                                                                                                                                                                                                                                                                                                                                               | Abdul Hamdy A Hamid; Ainihayati Noordin; Anita Sulong; Azrin Ahmad; Enizza Kasim; Haslina Mahbob; Irni Suhayu Sapian; Kon Ken Wong; Mohd Faizal Abu Bakar; Mohd Noor Mat Isa; Muttalillah Najihan A Samat; Najma Kori; Noor Hamiza Ghulam; Nor Maslini Ismail; Nordiana Ismail; Nur Sahairah Awang; Nurhezreen Md Iqbal; Patrick Periasamy; Shamsidar Sophie; Siti Noraini Othman; Siti Nurazizah M Asripin; Umi Kalsom Ali; Yusuf Muhammad Noor; Zetti Zainol Rashid                                                                                                                                                                                                                                                                                                                                                                                                                                                                                                                                                                                                                                                                                                                                                                   |
| EPI_ISL_2401799, EPI_ISL_2401823, EPI_ISL_2401840, EPI_ISL_2401864                                                                                                                                                                                                                                                                                                                                                                                                                                                                                                                                                                                                                                                                                                                                                                                                                                                                                                                                                                                                                                                                                                                                                                   | Hospital Center Emile Mayrisch                                                                            |                                     | Laboratoire national de sante, Microbiology, Microbial Genomics Platform                                                                                                                                                                                                                                                                                                                                                                                                                                                                                                                                                                                                                                                                                                                                                                                                                                                                | Anke Wienecke-Baldacchino; Catherine Ragimbeau; Cynthia Oxacelay; Fatu Djabi; Jessica Tapp; Lise Pignon; Raoul Salmon; Tamir Abdelrahman                                                                                                                                                                                                                                                                                                                                                                                                                                                                                                                                                                                                                                                                                                                                                                                                                                                                                                                                                                                                                                                                                                |
| EPI_ISL_2401895, EPI_ISL_3147617                                                                                                                                                                                                                                                                                                                                                                                                                                                                                                                                                                                                                                                                                                                                                                                                                                                                                                                                                                                                                                                                                                                                                                                                     | Hospital Center Luxembourg                                                                                |                                     | Laboratoire national de sante, Microbiology, Microbial Genomics Platform                                                                                                                                                                                                                                                                                                                                                                                                                                                                                                                                                                                                                                                                                                                                                                                                                                                                | Anke Wienecke-Baldacchino; Catherine Ragimbeau; Elodie Solarino; Fatu Djabi; Jean-Hugues Francois; Jessica Tapp; Lise Pignon; Michel Kohnen; Raoul Salmon; Tamir Abdelrahman; Virginie Jover                                                                                                                                                                                                                                                                                                                                                                                                                                                                                                                                                                                                                                                                                                                                                                                                                                                                                                                                                                                                                                            |
| EPI_ISL_3505928, EPI_ISL_3505945, EPI_ISL_3505964                                                                                                                                                                                                                                                                                                                                                                                                                                                                                                                                                                                                                                                                                                                                                                                                                                                                                                                                                                                                                                                                                                                                                                                    | Hospital General Universitario Gregorio Marañón                                                           |                                     | Hospital General Universitario Gregorio Marañón                                                                                                                                                                                                                                                                                                                                                                                                                                                                                                                                                                                                                                                                                                                                                                                                                                                                                         | Cristina Rodriguez-Grande; Darío García de Viedma; Julia Suárez; Laura Pérez-Lago; Marta Herranz Martin; Patricia Muñoz; Pedro Sola Campoy; Pilar Catalán; Sergio Buenestado Serrano; Victor Manuel de la Cueva                                                                                                                                                                                                                                                                                                                                                                                                                                                                                                                                                                                                                                                                                                                                                                                                                                                                                                                                                                                                                         |
| EPI_ISL_2374125, EPI_ISL_2598363, EPI_ISL_3925378, EPI_ISL_3925379                                                                                                                                                                                                                                                                                                                                                                                                                                                                                                                                                                                                                                                                                                                                                                                                                                                                                                                                                                                                                                                                                                                                                                   | Hospital General Universitario de Alicante - Instituto de Investigación Sanitaria y Biomédica de Alicante |                                     | SeqCOVID-SPAIN consortium/IBV(CSIC)                                                                                                                                                                                                                                                                                                                                                                                                                                                                                                                                                                                                                                                                                                                                                                                                                                                                                                     | Carmen Molina Pardines and SeqCOVID-SPAIN consortium; Maripaz Ventero Martín                                                                                                                                                                                                                                                                                                                                                                                                                                                                                                                                                                                                                                                                                                                                                                                                                                                                                                                                                                                                                                                                                                                                                            |
| EPI_ISL_4853972                                                                                                                                                                                                                                                                                                                                                                                                                                                                                                                                                                                                                                                                                                                                                                                                                                                                                                                                                                                                                                                                                                                                                                                                                      | Hospital Lahad Datu                                                                                       |                                     | Malaysia Genome Institute                                                                                                                                                                                                                                                                                                                                                                                                                                                                                                                                                                                                                                                                                                                                                                                                                                                                                                               | Azrin Ahmad; Enizza Kasim; Irni Suhayu Sapian; Mohd Faizal Abu Bakar; Mohd Ghows Mohd Azzam.; Mohd Noor Mat Isa; Nor Azfa Johari; Nurhezreen Md Iqbal; Shamsidar Sophie; Siti Noraini Othman; Yusuf Muhammad Noor                                                                                                                                                                                                                                                                                                                                                                                                                                                                                                                                                                                                                                                                                                                                                                                                                                                                                                                                                                                                                       |
| EPI_ISL_2650001                                                                                                                                                                                                                                                                                                                                                                                                                                                                                                                                                                                                                                                                                                                                                                                                                                                                                                                                                                                                                                                                                                                                                                                                                      | Hospital Sultanah Nur Zahirah Kuala Terengganu                                                            |                                     | Institute for Medical Research, Infectious Disease Research Centre, National Institutes of Health, Ministry of Health Malaysia                                                                                                                                                                                                                                                                                                                                                                                                                                                                                                                                                                                                                                                                                                                                                                                                          | Azizan MA; Kamel K; Mohd Zawawi Z; Ramly N; Robert F; Suppiah J; Thayan R                                                                                                                                                                                                                                                                                                                                                                                                                                                                                                                                                                                                                                                                                                                                                                                                                                                                                                                                                                                                                                                                                                                                                               |
| EPI_ISL_2620716                                                                                                                                                                                                                                                                                                                                                                                                                                                                                                                                                                                                                                                                                                                                                                                                                                                                                                                                                                                                                                                                                                                                                                                                                      | Hospital Tuanku Fauziah, Kangar                                                                           |                                     | Institute for Medical Research, Infectious Disease Research Centre, National Institutes of Health, Ministry of Health Malaysia                                                                                                                                                                                                                                                                                                                                                                                                                                                                                                                                                                                                                                                                                                                                                                                                          | Azizan MA; Kamel K; Mohd Zawawi Z; Ramly N; Robert F; Suppiah J; Thayan R                                                                                                                                                                                                                                                                                                                                                                                                                                                                                                                                                                                                                                                                                                                                                                                                                                                                                                                                                                                                                                                                                                                                                               |
| EPI_ISL_2620715                                                                                                                                                                                                                                                                                                                                                                                                                                                                                                                                                                                                                                                                                                                                                                                                                                                                                                                                                                                                                                                                                                                                                                                                                      | Hospital Tuanku Fauziah, Kangar                                                                           |                                     | Institute for Medical Research, Infectious Disease Research Centre, National Institutes of Health, Ministry of Health Malaysia                                                                                                                                                                                                                                                                                                                                                                                                                                                                                                                                                                                                                                                                                                                                                                                                          | Azizan MA; Kamel K; Mohd Zawawi Z; Ramly N; Robert F; Suppiah J; Thayan R                                                                                                                                                                                                                                                                                                                                                                                                                                                                                                                                                                                                                                                                                                                                                                                                                                                                                                                                                                                                                                                                                                                                                               |
| EPI_ISL_2516520, EPI_ISL_2516556, EPI_ISL_2637242, EPI_ISL_2637243                                                                                                                                                                                                                                                                                                                                                                                                                                                                                                                                                                                                                                                                                                                                                                                                                                                                                                                                                                                                                                                                                                                                                                   | Hospital Universitari Bellvitge                                                                           |                                     | Microbiology Department                                                                                                                                                                                                                                                                                                                                                                                                                                                                                                                                                                                                                                                                                                                                                                                                                                                                                                                 | Aida Gonzalez-Diaz; Carmen Ardanuy; Jordi Camara; Jordi Niubó; Laura Calatayud; M Angeles Domínguez; Miguel Fernandez-Huerta; Sara Marti                                                                                                                                                                                                                                                                                                                                                                                                                                                                                                                                                                                                                                                                                                                                                                                                                                                                                                                                                                                                                                                                                                |
| EPI_ISL_2566591                                                                                                                                                                                                                                                                                                                                                                                                                                                                                                                                                                                                                                                                                                                                                                                                                                                                                                                                                                                                                                                                                                                                                                                                                      | Hospital Universitari Joan XXIII                                                                          |                                     | Hospital Universitari Joan XXIII                                                                                                                                                                                                                                                                                                                                                                                                                                                                                                                                                                                                                                                                                                                                                                                                                                                                                                        | Carla Martín; Clara Benavent; Cristina Gutiérrez; Ester Picó; Gemma Recio; Margarida Terrón; Natalia Bastón                                                                                                                                                                                                                                                                                                                                                                                                                                                                                                                                                                                                                                                                                                                                                                                                                                                                                                                                                                                                                                                                                                                             |
| EPI_ISL_2391889, EPI_ISL_2458139, EPI_ISL_2628151                                                                                                                                                                                                                                                                                                                                                                                                                                                                                                                                                                                                                                                                                                                                                                                                                                                                                                                                                                                                                                                                                                                                                                                    | Hospital Universitari Vall d'Hebron - Vall d'Hebron Institut de Recerca                                   |                                     | Hospital Universitari Vall d'Hebron - Vall d'Hebron Institut de Recerca                                                                                                                                                                                                                                                                                                                                                                                                                                                                                                                                                                                                                                                                                                                                                                                                                                                                 | Alejandra González-Sánchez; Andrés Antón; Ariadna Rando; Carla Castillo; Cristina Andrés; Damir Garcia-Cehic; Josep Quer; Juliana Esperalba; Maria Carmen Martín; Maria Gema Codina; Maria Piñana; Tomás Pumarola                                                                                                                                                                                                                                                                                                                                                                                                                                                                                                                                                                                                                                                                                                                                                                                                                                                                                                                                                                                                                       |
| EPI_ISL_2597496, EPI_ISL_2597593, EPI_ISL_2597613, EPI_ISL_3022581, EPI_ISL_3022737                                                                                                                                                                                                                                                                                                                                                                                                                                                                                                                                                                                                                                                                                                                                                                                                                                                                                                                                                                                                                                                                                                                                                  | Hospital of the University of Pennsylvania Molecular Pathology Lab                                        |                                     | Bushman Lab - University of Pennsylvania                                                                                                                                                                                                                                                                                                                                                                                                                                                                                                                                                                                                                                                                                                                                                                                                                                                                                                | Aoife M. Roche; Arupa Ganguly; Ayannah S. Fitzgerald; Brendan Kelly; Jevon Graham-Wooten; John K. Everett; Kyle Rodino; Layla A. Khatib; Mike Feldman; Ronald G. Colman and Frederic Bushan; Samantha A. Whiteside; Scott Sherrill-Mix; Shantanu Reddy; Young Hwang                                                                                                                                                                                                                                                                                                                                                                                                                                                                                                                                                                                                                                                                                                                                                                                                                                                                                                                                                                     |
| EPI_ISL_2637449                                                                                                                                                                                                                                                                                                                                                                                                                                                                                                                                                                                                                                                                                                                                                                                                                                                                                                                                                                                                                                                                                                                                                                                                                      | Hôpital Ambroise-Paré                                                                                     |                                     | Department of Virology, Henri Mondor University Hospital, Assistance Publique Hôpitaux de Paris, Université Paris-Est Créteil, INSERM U955                                                                                                                                                                                                                                                                                                                                                                                                                                                                                                                                                                                                                                                                                                                                                                                              | Alexandre Soulier; Christophe Rodriguez; Elisabeth Trawinski; Guillaume Gricourt; Jean-Michel Pawlowsky; Melissa N'Debi; Slim Fourati; Vanessa Demontant                                                                                                                                                                                                                                                                                                                                                                                                                                                                                                                                                                                                                                                                                                                                                                                                                                                                                                                                                                                                                                                                                |
| EPI_ISL_2464483, EPI_ISL_2464484, EPI_ISL_2464493, EPI_ISL_2464495, EPI_ISL_2637399, EPI_ISL_2791265, EPI_ISL_2791336, EPI_ISL_3393432, EPI_ISL_3393462                                                                                                                                                                                                                                                                                                                                                                                                                                                                                                                                                                                                                                                                                                                                                                                                                                                                                                                                                                                                                                                                              | see above                                                                                                 | Hôpital Avicenne                    | Department of Virology, Henri Mondor University Hospital, Assistance Publique Hôpitaux de Paris, Université Paris-Est Créteil, INSERM U955                                                                                                                                                                                                                                                                                                                                                                                                                                                                                                                                                                                                                                                                                                                                                                                              | Alexandre Soulier; Christophe Rodriguez; Elisabeth Trawinski; Guillaume Gricourt; Jean-Michel Pawlowsky; Melissa N'Debi; Slim Fourati; Vanessa Demontant                                                                                                                                                                                                                                                                                                                                                                                                                                                                                                                                                                                                                                                                                                                                                                                                                                                                                                                                                                                                                                                                                |
| EPI_ISL_2467715                                                                                                                                                                                                                                                                                                                                                                                                                                                                                                                                                                                                                                                                                                                                                                                                                                                                                                                                                                                                                                                                                                                                                                                                                      | Hôpital Bichat Claude Bernard, Laboratoire de Virologie                                                   |                                     | IAME UMR1137 Inserm, Université de Paris, Hôpital Bichat                                                                                                                                                                                                                                                                                                                                                                                                                                                                                                                                                                                                                                                                                                                                                                                                                                                                                | Alexandre Storto; Amélie Recoing; Antoine Bridier-Nahmias; Benoit Visseaux; Charlotte Charpentier; Diane Descamps; Gilles Collin; Lena Daniel; Mélanie Bertine; Nadhira Houhou-Fidouh; Quentin Le Hingrat; Siham Hamri                                                                                                                                                                                                                                                                                                                                                                                                                                                                                                                                                                                                                                                                                                                                                                                                                                                                                                                                                                                                                  |
| EPI_ISL_2637398                                                                                                                                                                                                                                                                                                                                                                                                                                                                                                                                                                                                                                                                                                                                                                                                                                                                                                                                                                                                                                                                                                                                                                                                                      | Hôpital Bichat-Claude Bernard                                                                             |                                     | Department of Virology, Henri Mondor University Hospital, Assistance Publique Hôpitaux de Paris, Université Paris-Est Créteil, INSERM U955                                                                                                                                                                                                                                                                                                                                                                                                                                                                                                                                                                                                                                                                                                                                                                                              | Alexandre Soulier; Christophe Rodriguez; Elisabeth Trawinski; Guillaume Gricourt; Jean-Michel Pawlowsky; Melissa N'Debi; Slim Fourati; Vanessa Demontant                                                                                                                                                                                                                                                                                                                                                                                                                                                                                                                                                                                                                                                                                                                                                                                                                                                                                                                                                                                                                                                                                |
| EPI_ISL_2464442                                                                                                                                                                                                                                                                                                                                                                                                                                                                                                                                                                                                                                                                                                                                                                                                                                                                                                                                                                                                                                                                                                                                                                                                                      | Hôpital Bicêtre                                                                                           |                                     | Department of Virology, Henri Mondor University Hospital, Assistance Publique Hôpitaux de Paris, Université Paris-Est Créteil, INSERM U955                                                                                                                                                                                                                                                                                                                                                                                                                                                                                                                                                                                                                                                                                                                                                                                              | Alexandre Soulier; Christophe Rodriguez; Elisabeth Trawinski; Guillaume Gricourt; Jean-Michel Pawlowsky; Melissa N'Debi; Slim Fourati; Vanessa Demontant                                                                                                                                                                                                                                                                                                                                                                                                                                                                                                                                                                                                                                                                                                                                                                                                                                                                                                                                                                                                                                                                                |
| EPI_ISL_2464548, EPI_ISL_2464549, EPI_ISL_2464551, EPI_ISL_2637494, EPI_ISL_2637615, EPI_ISL_2637815, EPI_ISL_3392224, EPI_ISL_3392248                                                                                                                                                                                                                                                                                                                                                                                                                                                                                                                                                                                                                                                                                                                                                                                                                                                                                                                                                                                                                                                                                               | see above                                                                                                 | Hôpital Cochin                      | Department of Virology, Henri Mondor University Hospital, Assistance Publique Hôpitaux de Paris, Université Paris-Est Créteil, INSERM U955                                                                                                                                                                                                                                                                                                                                                                                                                                                                                                                                                                                                                                                                                                                                                                                              | Alexandre Soulier; Christophe Rodriguez; Elisabeth Trawinski; Guillaume Gricourt; Jean-Michel Pawlowsky; Melissa N'Debi; Slim Fourati; Vanessa Demontant                                                                                                                                                                                                                                                                                                                                                                                                                                                                                                                                                                                                                                                                                                                                                                                                                                                                                                                                                                                                                                                                                |
| EPI_ISL_2464481, EPI_ISL_2637537                                                                                                                                                                                                                                                                                                                                                                                                                                                                                                                                                                                                                                                                                                                                                                                                                                                                                                                                                                                                                                                                                                                                                                                                     | Hôpital Paul Brousse                                                                                      |                                     | Department of Virology, Henri Mondor University Hospital, Assistance Publique                                                                                                                                                                                                                                                                                                                                                                                                                                                                                                                                                                                                                                                                                                                                                                                                                                                           | Alexandre Soulier; Christophe Rodriguez; Elisabeth Trawinski; Guillaume Gricourt; Jean-Michel Pawlowsky; Melissa N'Debi; Slim Fourati; Vanessa Demontant                                                                                                                                                                                                                                                                                                                                                                                                                                                                                                                                                                                                                                                                                                                                                                                                                                                                                                                                                                                                                                                                                |

|                                                                                                                                                                                                                                                                                                                                                                                                                                                                                                                                                                                                                                                                                                                                                                                                                                                                                                                                                                                                                                                                                                                                                                                                                                                                                         |                                                                                           |                                                                                                                                                                                                                                                                                                                                                                                                                                                           |                                                                                                                                                                                                                                                                                                                                                                                                                                                                                                                                                                                                                                                                                                                                                                                                                                                                                                                                                                                    |
|-----------------------------------------------------------------------------------------------------------------------------------------------------------------------------------------------------------------------------------------------------------------------------------------------------------------------------------------------------------------------------------------------------------------------------------------------------------------------------------------------------------------------------------------------------------------------------------------------------------------------------------------------------------------------------------------------------------------------------------------------------------------------------------------------------------------------------------------------------------------------------------------------------------------------------------------------------------------------------------------------------------------------------------------------------------------------------------------------------------------------------------------------------------------------------------------------------------------------------------------------------------------------------------------|-------------------------------------------------------------------------------------------|-----------------------------------------------------------------------------------------------------------------------------------------------------------------------------------------------------------------------------------------------------------------------------------------------------------------------------------------------------------------------------------------------------------------------------------------------------------|------------------------------------------------------------------------------------------------------------------------------------------------------------------------------------------------------------------------------------------------------------------------------------------------------------------------------------------------------------------------------------------------------------------------------------------------------------------------------------------------------------------------------------------------------------------------------------------------------------------------------------------------------------------------------------------------------------------------------------------------------------------------------------------------------------------------------------------------------------------------------------------------------------------------------------------------------------------------------------|
|                                                                                                                                                                                                                                                                                                                                                                                                                                                                                                                                                                                                                                                                                                                                                                                                                                                                                                                                                                                                                                                                                                                                                                                                                                                                                         |                                                                                           | Hôpitaux de Paris, Université Paris-Est Créteil, INSERM U955                                                                                                                                                                                                                                                                                                                                                                                              |                                                                                                                                                                                                                                                                                                                                                                                                                                                                                                                                                                                                                                                                                                                                                                                                                                                                                                                                                                                    |
| EPI_ISL_2637420                                                                                                                                                                                                                                                                                                                                                                                                                                                                                                                                                                                                                                                                                                                                                                                                                                                                                                                                                                                                                                                                                                                                                                                                                                                                         | Hôpital Pitié-Salpêtrière                                                                 | Department of Virology, Henri Mondor University Hospital, Assistance Publique Hôpitaux de Paris, Université Paris-Est Créteil, INSERM U955                                                                                                                                                                                                                                                                                                                | Alexandre Soulier; Christophe Rodriguez; Elisabeth Trawinski; Guillaume Gricourt; Jean-Michel Pawlowsky; Melissa N'Debi; Slim Fourati; Vanessa Demontant                                                                                                                                                                                                                                                                                                                                                                                                                                                                                                                                                                                                                                                                                                                                                                                                                           |
| EPI_ISL_2637598                                                                                                                                                                                                                                                                                                                                                                                                                                                                                                                                                                                                                                                                                                                                                                                                                                                                                                                                                                                                                                                                                                                                                                                                                                                                         | Hôpital Saint-Louis                                                                       | Department of Virology, Henri Mondor University Hospital, Assistance Publique Hôpitaux de Paris, Université Paris-Est Créteil, INSERM U955                                                                                                                                                                                                                                                                                                                | Alexandre Soulier; Christophe Rodriguez; Elisabeth Trawinski; Guillaume Gricourt; Jean-Michel Pawlowsky; Melissa N'Debi; Slim Fourati; Vanessa Demontant                                                                                                                                                                                                                                                                                                                                                                                                                                                                                                                                                                                                                                                                                                                                                                                                                           |
| EPI_ISL_3127991                                                                                                                                                                                                                                                                                                                                                                                                                                                                                                                                                                                                                                                                                                                                                                                                                                                                                                                                                                                                                                                                                                                                                                                                                                                                         | IA State Hygienic Laboratory                                                              | Centers for Disease Control and Prevention Division of Viral Diseases, Pathogen Discovery                                                                                                                                                                                                                                                                                                                                                                 | Alex Burgin; Ben L. Rambo-Martin; Clinton R. Paden; Dakota Howard; Dave Wentworth; Dhvani Batra; Jasmine Padilla; Justin Lee; Krista Queen; Kristen Knipe; Kristine Lacey; Mark Burroughs; Matthew Schmerer; Meghan Bentz; Mili Sheth; Peter Cook; Sam Shepard; Sarah Nobles; Suxiang Tong; Vivien Dugan; Yvette Unoarumhi                                                                                                                                                                                                                                                                                                                                                                                                                                                                                                                                                                                                                                                         |
| EPI_ISL_2546348                                                                                                                                                                                                                                                                                                                                                                                                                                                                                                                                                                                                                                                                                                                                                                                                                                                                                                                                                                                                                                                                                                                                                                                                                                                                         | ICMR-National Institute of Virology - INSCOG                                              | NIV Influenza                                                                                                                                                                                                                                                                                                                                                                                                                                             | NIV; Potdar; Pune; Varsha on behalf of National Influenza Centre                                                                                                                                                                                                                                                                                                                                                                                                                                                                                                                                                                                                                                                                                                                                                                                                                                                                                                                   |
| EPI_ISL_3355128                                                                                                                                                                                                                                                                                                                                                                                                                                                                                                                                                                                                                                                                                                                                                                                                                                                                                                                                                                                                                                                                                                                                                                                                                                                                         | ID Bureau of Laboratories                                                                 | Centers for Disease Control and Prevention Division of Viral Diseases, Pathogen Discovery                                                                                                                                                                                                                                                                                                                                                                 | Alex Burgin; Ben Rambo-Martin; Clinton Paden; Dakota Howard; Dave Wentworth; Dhvani Batra; Jasmine Padilla; Justin Lee; Krista Queen; Kristen Knipe; Kristine Lacey; Mark Burroughs; Matthew Schmerer; Meghan Bentz; Mili Sheth; Peter Cook; Sam Shepard; Sarah Nobles; Suxiang Tong; Vivien Dugan; Yvette Unoarumhi                                                                                                                                                                                                                                                                                                                                                                                                                                                                                                                                                                                                                                                               |
| EPI_ISL_4297807                                                                                                                                                                                                                                                                                                                                                                                                                                                                                                                                                                                                                                                                                                                                                                                                                                                                                                                                                                                                                                                                                                                                                                                                                                                                         | IHU Mediterranean Infection                                                               | IHU Mediterranean Infection                                                                                                                                                                                                                                                                                                                                                                                                                               | Philippe Colson et al.                                                                                                                                                                                                                                                                                                                                                                                                                                                                                                                                                                                                                                                                                                                                                                                                                                                                                                                                                             |
| EPI_ISL_2451794, EPI_ISL_2451799                                                                                                                                                                                                                                                                                                                                                                                                                                                                                                                                                                                                                                                                                                                                                                                                                                                                                                                                                                                                                                                                                                                                                                                                                                                        | IL Dept. of Public Health Springfield Laboratory                                          | Centers for Disease Control and Prevention Division of Viral Diseases, Pathogen Discovery                                                                                                                                                                                                                                                                                                                                                                 | Alison Laufer Halpin; Ben L. Rambo-Martin; Clinton R. Paden; Dakota Howard; Darlene Wagner; Dave Wentworth; Dhvani Batra; Jasmine Padilla; Justin Lee; Krista Queen; Kristen Knipe; Kristine Lacey; Mark Burroughs; Matthew Schmerer; Mili Sheth; Peter Cook; Sam Shepard; Sarah Nobles; Shoshona Le; Suxiang Tong; Vivien Dugan; Yvette Unoarumhi                                                                                                                                                                                                                                                                                                                                                                                                                                                                                                                                                                                                                                 |
| EPI_ISL_3230208                                                                                                                                                                                                                                                                                                                                                                                                                                                                                                                                                                                                                                                                                                                                                                                                                                                                                                                                                                                                                                                                                                                                                                                                                                                                         | INMI Lazzaro Spallanzani IRCCS                                                            | INMI Lazzaro Spallanzani IRCCS                                                                                                                                                                                                                                                                                                                                                                                                                            | ; A Di Caro; B Bartolini; CEM Gruber; E Giombini; F Colavita; F Messina; F Santini; G Bonfiglio; M Rueca; MR Capobianchi; O Butera; S Meschi                                                                                                                                                                                                                                                                                                                                                                                                                                                                                                                                                                                                                                                                                                                                                                                                                                       |
| EPI_ISL_2879016, EPI_ISL_2879486                                                                                                                                                                                                                                                                                                                                                                                                                                                                                                                                                                                                                                                                                                                                                                                                                                                                                                                                                                                                                                                                                                                                                                                                                                                        | INSCOG Surveillance                                                                       | INSCOG at CSIR Institute of Genomics and Integrative Biology                                                                                                                                                                                                                                                                                                                                                                                              | INSCOG                                                                                                                                                                                                                                                                                                                                                                                                                                                                                                                                                                                                                                                                                                                                                                                                                                                                                                                                                                             |
| EPI_ISL_3614345                                                                                                                                                                                                                                                                                                                                                                                                                                                                                                                                                                                                                                                                                                                                                                                                                                                                                                                                                                                                                                                                                                                                                                                                                                                                         | INSCOG-MANIPUR                                                                            | National Institute of Biomedical Genomics - INSCOG                                                                                                                                                                                                                                                                                                                                                                                                        | Arindam Maitra; Kh. Ranjana Devi; L. Shivadutta Singh; Nidhan Kumar Biswas; R.K.Manojkumar Singh; Saumitra Das; Sreedhar Chinnaswamy                                                                                                                                                                                                                                                                                                                                                                                                                                                                                                                                                                                                                                                                                                                                                                                                                                               |
| EPI_ISL_2547487                                                                                                                                                                                                                                                                                                                                                                                                                                                                                                                                                                                                                                                                                                                                                                                                                                                                                                                                                                                                                                                                                                                                                                                                                                                                         | INSCOG-MEGHALAYA                                                                          | National Institute of Biomedical Genomics - INSCOG                                                                                                                                                                                                                                                                                                                                                                                                        | Arindam Maitra; E Marak; E Shadap; Nidhan Kumar Biswas; R. Lyngdoh; Saumitra Das; Sreedhar Chinnaswamy                                                                                                                                                                                                                                                                                                                                                                                                                                                                                                                                                                                                                                                                                                                                                                                                                                                                             |
| EPI_ISL_2433265                                                                                                                                                                                                                                                                                                                                                                                                                                                                                                                                                                                                                                                                                                                                                                                                                                                                                                                                                                                                                                                                                                                                                                                                                                                                         | INSCOG-Tripura                                                                            | National Institute of Biomedical Genomics - INSCOG                                                                                                                                                                                                                                                                                                                                                                                                        | Apurba Sarkar; Arindam Maitra; Nidhan Kumar Biswas; Saikat Majumder; Saumitra Das; Sreedhar Chinnaswamy; Tapan Majumdar                                                                                                                                                                                                                                                                                                                                                                                                                                                                                                                                                                                                                                                                                                                                                                                                                                                            |
| EPI_ISL_2503441, EPI_ISL_2503558, EPI_ISL_2503610, EPI_ISL_2503681, EPI_ISL_2503683, EPI_ISL_2503756, EPI_ISL_2548645, EPI_ISL_2548826                                                                                                                                                                                                                                                                                                                                                                                                                                                                                                                                                                                                                                                                                                                                                                                                                                                                                                                                                                                                                                                                                                                                                  | see above                                                                                 | INSCOG-WB                                                                                                                                                                                                                                                                                                                                                                                                                                                 | Ajay Chakraborti; Arindam Maitra; Bhaswati Bandyopadhyay; Nidhan Kumar Biswas; Saumitra Das; Sreedhar Chinnaswamy; Tamal Ghosh                                                                                                                                                                                                                                                                                                                                                                                                                                                                                                                                                                                                                                                                                                                                                                                                                                                     |
| EPI_ISL_2860027, EPI_ISL_2860061, EPI_ISL_2860067, EPI_ISL_2860133                                                                                                                                                                                                                                                                                                                                                                                                                                                                                                                                                                                                                                                                                                                                                                                                                                                                                                                                                                                                                                                                                                                                                                                                                      | IOM- Manila Health Centre Laboratory                                                      | Philippine Genome Center                                                                                                                                                                                                                                                                                                                                                                                                                                  | Alethea R. de Guzman; Anna Ong-Lim; Arianne A. Zamora; Benedict A. Maralit; Carlo M. Lapid; Celia Carlos; Devon Ray Pacial; Diomedes A. Carino; Edsel Maurice Salvaña; El King D. Morado; Elcid Aaron R. Pangilinan; Eva Maria Cutiongco-de la Paz; Francis A. Tablizo; Henrietta Marie Rodriguez; Jaime C. Montoya; Jan Michael C. Yap; Jarvin E. Nipales; Jo-Hannah S. Llamas; John Q. Wong; Joshua Gregor A. Dizon; Juan Antonio R. Magalang; Karol Sophia Agape R. Padilla; Kenneth M. Kim; Kris P. Punayan; Kristina Patriz Dela Cruz; Lindsay Claire D.L. Carandang; Ma. Exanil Planting; Marc Edsel C. Ayes; Maria Rosario Singh-Vergeire and Cynthia P. Saloma; Maria Sofia L. Yangzon; Marielle M Gamboa; Marissa Alejandria; Nina Francesca Bustamante; Razel Nikka M. Hao; Renato Jacinto Q. Mantaring; Rianna Patricia S. Cruz; Sheila Mae M. Araiza; Yvonne Valerie Austria; Zipporah Mariebelle R. Enriquez; Zyrrel V. Mollejon                                      |
| EPI_ISL_2774216                                                                                                                                                                                                                                                                                                                                                                                                                                                                                                                                                                                                                                                                                                                                                                                                                                                                                                                                                                                                                                                                                                                                                                                                                                                                         | IRCCS San Gallicano Dermatological Institute                                              | IRCCS Regina Elena National Cancer Institute                                                                                                                                                                                                                                                                                                                                                                                                              | Aldo Morrone; Alice Massacci; Fabrizio Ensoli; Francisco Obregon; Frauke Goeman; Fulvia Pimpinelli; Gennaro Ciliberto; Giovanni Blandino; Giulia Orlandi; Maurizia Fanciulli                                                                                                                                                                                                                                                                                                                                                                                                                                                                                                                                                                                                                                                                                                                                                                                                       |
| EPI_ISL_2427302, EPI_ISL_2427315, EPI_ISL_2500404, EPI_ISL_2500406, EPI_ISL_2789959, EPI_ISL_3010146                                                                                                                                                                                                                                                                                                                                                                                                                                                                                                                                                                                                                                                                                                                                                                                                                                                                                                                                                                                                                                                                                                                                                                                    | IVY3 Central Lab, Vanderbilt University Medical Center                                    | Lauring Lab, University of Michigan, Department of Microbiology and Immunology                                                                                                                                                                                                                                                                                                                                                                            | Gilbert; Valesano                                                                                                                                                                                                                                                                                                                                                                                                                                                                                                                                                                                                                                                                                                                                                                                                                                                                                                                                                                  |
| EPI_ISL_2800816                                                                                                                                                                                                                                                                                                                                                                                                                                                                                                                                                                                                                                                                                                                                                                                                                                                                                                                                                                                                                                                                                                                                                                                                                                                                         | Illinois Department of Public Health                                                      | Illinois Department of Public Health - Chicago Lab                                                                                                                                                                                                                                                                                                                                                                                                        | Ira Heimler; Joel Price; Vineet K. Dhiman                                                                                                                                                                                                                                                                                                                                                                                                                                                                                                                                                                                                                                                                                                                                                                                                                                                                                                                                          |
| EPI_ISL_4716613, EPI_ISL_4716980, EPI_ISL_4741449, EPI_ISL_5542583, EPI_ISL_5542709, EPI_ISL_5542760, EPI_ISL_5542796, EPI_ISL_5542883, EPI_ISL_5547560, EPI_ISL_5562406                                                                                                                                                                                                                                                                                                                                                                                                                                                                                                                                                                                                                                                                                                                                                                                                                                                                                                                                                                                                                                                                                                                | see above                                                                                 | Ilocos Training and Regional Medical Center                                                                                                                                                                                                                                                                                                                                                                                                               | Alethea R. de Guzman; Alyssa Joyce E. Telles; Anna Ong-Lim; Arianne A. Zamora; Benedict A. Maralit; Carlo M. Lapid; Celia Carlos; Cynthia P. Saloma; Devon Ray Pacial; Diomedes A. Carino; Edsel Maurice Salvaña; El King D. Morado; Elcid Aaron R. Pangilinan; Eva Maria Cutiongco-de la Paz; Francis A. Tablizo; Henrietta Marie Rodriguez; Jaime C. Montoya; Jan Michael C. Yap; Jarvin E. Nipales; Jo-Hannah S. Llamas; John Michael Egana; John Q. Wong; Joshua Jose Endozo; Juan Antonio R. Magalang; Karol Sophia Agape R. Padilla; Kenneth M. Kim; Kris P. Punayan; Kristina Patriz Dela Cruz; Lindsay Clare D.L. Carandang; Ma. Exanil Planting; Marc Edsel C. Ayes; Maria Rosario Singh-Vergeire; Maria Sofia L. Yangzon; Marielle M. Gamboa; Marissa Alejandria; Niña Francesca Bustamante; Razel Nikka M. Hao; Renato Jacinto Q. Mantaring; Rianna Patricia S. Cruz; Sheila Mae M. Araiza; Yvonne Valerie Austria; Zipporah Mariebelle R. Enriquez; Zyrrel V. Mollejon |
| EPI_ISL_5563362                                                                                                                                                                                                                                                                                                                                                                                                                                                                                                                                                                                                                                                                                                                                                                                                                                                                                                                                                                                                                                                                                                                                                                                                                                                                         | Iloilo Provincial Hospital                                                                | Philippine Genome Center                                                                                                                                                                                                                                                                                                                                                                                                                                  | Alethea R. de Guzman; Alyssa Joyce E. Telles; Anna Ong-Lim; Arianne A. Zamora; Benedict A. Maralit; Carlo M. Lapid; Celia Carlos; Cynthia P. Saloma; Devon Ray Pacial; Diomedes A. Carino; Edsel Maurice Salvaña; El King D. Morado; Elcid Aaron R. Pangilinan; Eva Maria Cutiongco-de la Paz; Francis A. Tablizo; Henrietta Marie Rodriguez; Jaime C. Montoya; Jan Michael C. Yap; Jarvin E. Nipales; Jo-Hannah S. Llamas; John Michael Egana; John Q. Wong; Joshua Jose Endozo; Juan Antonio R. Magalang; Karol Sophia Agape R. Padilla; Kenneth M. Kim; Kris P. Punayan; Kristina Patriz Dela Cruz; Lindsay Clare D.L. Carandang; Ma. Exanil Planting; Marc Edsel C. Ayes; Maria Rosario Singh-Vergeire; Maria Sofia L. Yangzon; Marielle M. Gamboa; Marissa Alejandria; Niña Francesca Bustamante; Razel Nikka M. Hao; Renato Jacinto Q. Mantaring; Rianna Patricia S. Cruz; Sheila Mae M. Araiza; Yvonne Valerie Austria; Zipporah Mariebelle R. Enriquez; Zyrrel V. Mollejon |
| EPI_ISL_4056005, EPI_ISL_4056006, EPI_ISL_4056008                                                                                                                                                                                                                                                                                                                                                                                                                                                                                                                                                                                                                                                                                                                                                                                                                                                                                                                                                                                                                                                                                                                                                                                                                                       | Indrapura Field Hospital Surabaya                                                         | Institute of Tropical Disease, Universitas Airlangga                                                                                                                                                                                                                                                                                                                                                                                                      | Aldise M Nastri; Gatot Soegiarto; Jezzy R Dewantari; Kazufumi Shimizu; Kohar Hari Santoso; Krisnoadi Rahardjo; Laksmi Wulandari; Maria I Lusida; Resti Yudhawati; Rima R Prasetya; Soetjipto; Yasuko Mori                                                                                                                                                                                                                                                                                                                                                                                                                                                                                                                                                                                                                                                                                                                                                                          |
| EPI_ISL_2375591, EPI_ISL_2652536, EPI_ISL_2652577, EPI_ISL_2652723, EPI_ISL_2652753, EPI_ISL_2652755, EPI_ISL_2652798, EPI_ISL_2652920, EPI_ISL_3305218, EPI_ISL_4382666, EPI_ISL_4382962, EPI_ISL_4382977, EPI_ISL_4383202, EPI_ISL_4383243, EPI_ISL_4383443, EPI_ISL_4383671, EPI_ISL_4383687, EPI_ISL_4383828, EPI_ISL_4384048, EPI_ISL_4384149, EPI_ISL_4384161, EPI_ISL_4384569, EPI_ISL_4384693, EPI_ISL_4384737, EPI_ISL_4384806, EPI_ISL_4384925, EPI_ISL_4385214, EPI_ISL_4385270, EPI_ISL_4385331, EPI_ISL_4385357, EPI_ISL_4385469, EPI_ISL_4385648, EPI_ISL_4385700, EPI_ISL_4385757, EPI_ISL_4385878, EPI_ISL_4385928, EPI_ISL_4386075, EPI_ISL_4386228, EPI_ISL_4386401, EPI_ISL_4386951, EPI_ISL_4387009, EPI_ISL_4387046, EPI_ISL_4387626, EPI_ISL_4387659, EPI_ISL_4387733, EPI_ISL_4387733, EPI_ISL_4387912, EPI_ISL_4388101, EPI_ISL_4388194, EPI_ISL_4388270, EPI_ISL_4388284, EPI_ISL_4388320, EPI_ISL_4388343, EPI_ISL_4388355, EPI_ISL_4388770, EPI_ISL_4388822, EPI_ISL_4388880, EPI_ISL_4389669, EPI_ISL_4389820, EPI_ISL_4389422, EPI_ISL_4389682, EPI_ISL_4389978, EPI_ISL_4390047, EPI_ISL_4390172, EPI_ISL_4390219, EPI_ISL_4390223, EPI_ISL_4390267, EPI_ISL_4390292, EPI_ISL_4390331, EPI_ISL_4390401, EPI_ISL_4390492, EPI_ISL_4390698, EPI_ISL_4390796 | Centers for Disease Control and Prevention Division of Viral Diseases, Pathogen Discovery | Adrian Paskey; Benjamin Rambo-Martin; Chirayu Goswami; Christian Bixby; Christopher Gulvick; Clinton Paden; Clinton R. Paden; Dakota Howard; Darlene Wagner; Dhvani Batra; Duncan MacCannell; Erisa Sula; Jason Caravas; Jonathan Schultz; Kara Moser; Kristine Lacey; Matthew Schmerer; Peter Cook; Peter W. Cook; Robin Greenwood; Russ Hager; Scott Sammons; Shatavia Morrison; Tymeckia Kendall; Victoria Caban Figueroa; Yihe Wang; Yvette Unoarumhi |                                                                                                                                                                                                                                                                                                                                                                                                                                                                                                                                                                                                                                                                                                                                                                                                                                                                                                                                                                                    |
| EPI_ISL_2820831                                                                                                                                                                                                                                                                                                                                                                                                                                                                                                                                                                                                                                                                                                                                                                                                                                                                                                                                                                                                                                                                                                                                                                                                                                                                         | Innlandet Hospital Trust, Division Lillehammer                                            | Norwegian Institute of Public Health, Department of Virology                                                                                                                                                                                                                                                                                                                                                                                              | Atiya R Ali; Debech Nadia; Engebretsen Serina Beate; Garcia Llorente Ignacio; Hilde Elishaug; Hilde Volla; Jon Bråte; Kamilla Heddeland Instefjord; Karoline Bragstad; Kathrine Stene-Johansen; Line Victoria Moen; Marie Paulsen Madsen; Olav Hungnes; Pedersen Benedikte Nevjen; Rasmus Riis Kopperud                                                                                                                                                                                                                                                                                                                                                                                                                                                                                                                                                                                                                                                                            |
| EPI_ISL_3914942, EPI_ISL_3914946, EPI_ISL_3914957                                                                                                                                                                                                                                                                                                                                                                                                                                                                                                                                                                                                                                                                                                                                                                                                                                                                                                                                                                                                                                                                                                                                                                                                                                       | Institut National D'hygiene, Lome, Togo                                                   | Noguchi Memorial Institute for Medical Research, University of Ghana, Legon, Ghana                                                                                                                                                                                                                                                                                                                                                                        | Afiwa W. Halatoko; Ameyo Dorkenoo; Anoumou Dagnran; Djimabi Salah; Hamadi Assane; Hilda Opoku Frempong; Issaka Maman; Joseph H.K. Bonney; Joyce Appiah-Kubi; Keren O. Attiku; Komlan Kossi; Lallepak Lamboni; Mounero Salou; Peace O. Uche; Quaneeta Mohktar; Sena Awunyo; Seyram B. Agbenyo; Yao Layibo; Yawo A. Sadi; Zoukaneriri Issa; and Bright Adu                                                                                                                                                                                                                                                                                                                                                                                                                                                                                                                                                                                                                           |
| EPI_ISL_2625633, EPI_ISL_2625635, EPI_ISL_2684231, EPI_ISL_2684232, EPI_ISL_2684233, EPI_ISL_2684545, EPI_ISL_2685359, EPI_ISL_2685766, EPI_ISL_2685835, EPI_ISL_2685836, EPI_ISL_2685841, EPI_ISL_2685842, EPI_ISL_2685843, EPI_ISL_2685844, EPI_ISL_2685845, EPI_ISL_2811887, EPI_ISL_2815375                                                                                                                                                                                                                                                                                                                                                                                                                                                                                                                                                                                                                                                                                                                                                                                                                                                                                                                                                                                         | see above                                                                                 | Institute for Medical Research, Infectious Disease Research Centre, National Institutes of Health, Ministry of Health Malaysia                                                                                                                                                                                                                                                                                                                            | Azizan MA; Kamel K; Mohd Zawawi Z; Ramly N; Robert F; Suppiah J; Thayan R                                                                                                                                                                                                                                                                                                                                                                                                                                                                                                                                                                                                                                                                                                                                                                                                                                                                                                          |
| EPI_ISL_2695882                                                                                                                                                                                                                                                                                                                                                                                                                                                                                                                                                                                                                                                                                                                                                                                                                                                                                                                                                                                                                                                                                                                                                                                                                                                                         | Institute of Diagnostic Virology, Friedrich-Loeffler-Institut                             | Institute of Diagnostic Virology, Friedrich-Loeffler-Institut                                                                                                                                                                                                                                                                                                                                                                                             | A. and Beer, M.; Breithaupt, A.; Corleis, B.; Dorhoi; Fricke, C.; Halwe; Hoffmann, D.; Kraft, A.; Mettenleiter; Michelitsch, A.; Muehe, J.; Mueller, N.J.; Petsch, B.; Rauch, S.; Roth, N.; S.O.; Schoen, J.; Sick, F.; T.C.; Ulrich, L.; Wernicke, K.; Wylezich, C.                                                                                                                                                                                                                                                                                                                                                                                                                                                                                                                                                                                                                                                                                                               |
| EPI_ISL_2600365, EPI_ISL_2600370, EPI_ISL_2600371, EPI_ISL_2774047                                                                                                                                                                                                                                                                                                                                                                                                                                                                                                                                                                                                                                                                                                                                                                                                                                                                                                                                                                                                                                                                                                                                                                                                                      | Institute of Epidemiology, Disease Control and Research (IEDCR)                           | IEDCR-ideShi-icddr,b                                                                                                                                                                                                                                                                                                                                                                                                                                      | Firdausi Qadri; Hassan Afrad; Manjur Hossain Khan; Sadia Rahman; Tahmina Shirin                                                                                                                                                                                                                                                                                                                                                                                                                                                                                                                                                                                                                                                                                                                                                                                                                                                                                                    |
| EPI_ISL_3031993                                                                                                                                                                                                                                                                                                                                                                                                                                                                                                                                                                                                                                                                                                                                                                                                                                                                                                                                                                                                                                                                                                                                                                                                                                                                         | Institute of Virology, Medical Center, University of Freiburg, Freiburg, Germany          | Institute of Virology, Clinical Virus Genomics, Medical Center, University of Freiburg, Freiburg, Germany                                                                                                                                                                                                                                                                                                                                                 | Hajo Grundmann; Jonas Fuchs; Lena Jaki; Lisa Kern; Marcus Panning; Sandra Reuter                                                                                                                                                                                                                                                                                                                                                                                                                                                                                                                                                                                                                                                                                                                                                                                                                                                                                                   |
| EPI_ISL_2493039, EPI_ISL_2685980, EPI_ISL_2685981, EPI_ISL_2685990, EPI_ISL_2685997, EPI_ISL_2841656, EPI_ISL_3730476, EPI_ISL_3860117, EPI_ISL_3860123, EPI_ISL_4575064, EPI_ISL_4575065, EPI_ISL_4575066, EPI_ISL_4575067, EPI_ISL_4575075                                                                                                                                                                                                                                                                                                                                                                                                                                                                                                                                                                                                                                                                                                                                                                                                                                                                                                                                                                                                                                            | see above                                                                                 | Instituto Nacional de Investigación em Saúde                                                                                                                                                                                                                                                                                                                                                                                                              | Afonso P; David K; Emmanuel SJ; Freitas RH; Giandhari J; Inglês L; Lutucuta S; Miranda J; Morais J; Mufinda M; Naidoo Y; Neto Z; Paulo A Carralero RR Paixão JP; Pereira A; Pillay S; Tegally H; Wilkinson E; de Oliveira T                                                                                                                                                                                                                                                                                                                                                                                                                                                                                                                                                                                                                                                                                                                                                        |
| EPI_ISL_2495048                                                                                                                                                                                                                                                                                                                                                                                                                                                                                                                                                                                                                                                                                                                                                                                                                                                                                                                                                                                                                                                                                                                                                                                                                                                                         | Instituto Nacional de Investigación em Saúde                                              | KRISP, KZN Research Innovation and Sequencing Platform                                                                                                                                                                                                                                                                                                                                                                                                    | Afonso P; David K; Emmanuel SJ; Freitas RH; Giandhari J; Inglês L; Lutucuta S; Miranda J; Morais J; Mufinda M; Naidoo Y; Neto Z; Paulo A Carralero RR Paixão JP; Pereira A; Pillay S; Tegally H; Wilkinson E; de Oliveira T                                                                                                                                                                                                                                                                                                                                                                                                                                                                                                                                                                                                                                                                                                                                                        |
| EPI_ISL_2617184, EPI_ISL_2617185, EPI_ISL_2688576, EPI_ISL_2688578, EPI_ISL_3447989, EPI_ISL_3447993, EPI_ISL_3447994, EPI_ISL_3447995, EPI_ISL_3447996, EPI_ISL_3447997, EPI_ISL_3447998                                                                                                                                                                                                                                                                                                                                                                                                                                                                                                                                                                                                                                                                                                                                                                                                                                                                                                                                                                                                                                                                                               |                                                                                           |                                                                                                                                                                                                                                                                                                                                                                                                                                                           |                                                                                                                                                                                                                                                                                                                                                                                                                                                                                                                                                                                                                                                                                                                                                                                                                                                                                                                                                                                    |



| Laboratory Service                                                                                                                                                                                                                                                                                                                                                                                                                                                                                                                                                                                                                                                                                                                                                                                                                                                                                                                                                                                                                                                                                                                                                                                                                                                                                                                                                                                                                                                                                                                                                                                                                                                                                                                                                                                                                                                                                                                                                                                                                                                                                                                                                                                                                                                                                                                                                                                                                                                                                                                                                                                                 |           |                                                                  |                                                                                                                                                                                                                                                                                                                                                                                                                                                                                                                                                                                                                                                                                                                                                                                                                                                                                                                                                                        |                                                                         |
|--------------------------------------------------------------------------------------------------------------------------------------------------------------------------------------------------------------------------------------------------------------------------------------------------------------------------------------------------------------------------------------------------------------------------------------------------------------------------------------------------------------------------------------------------------------------------------------------------------------------------------------------------------------------------------------------------------------------------------------------------------------------------------------------------------------------------------------------------------------------------------------------------------------------------------------------------------------------------------------------------------------------------------------------------------------------------------------------------------------------------------------------------------------------------------------------------------------------------------------------------------------------------------------------------------------------------------------------------------------------------------------------------------------------------------------------------------------------------------------------------------------------------------------------------------------------------------------------------------------------------------------------------------------------------------------------------------------------------------------------------------------------------------------------------------------------------------------------------------------------------------------------------------------------------------------------------------------------------------------------------------------------------------------------------------------------------------------------------------------------------------------------------------------------------------------------------------------------------------------------------------------------------------------------------------------------------------------------------------------------------------------------------------------------------------------------------------------------------------------------------------------------------------------------------------------------------------------------------------------------|-----------|------------------------------------------------------------------|------------------------------------------------------------------------------------------------------------------------------------------------------------------------------------------------------------------------------------------------------------------------------------------------------------------------------------------------------------------------------------------------------------------------------------------------------------------------------------------------------------------------------------------------------------------------------------------------------------------------------------------------------------------------------------------------------------------------------------------------------------------------------------------------------------------------------------------------------------------------------------------------------------------------------------------------------------------------|-------------------------------------------------------------------------|
| EPI_ISL_2382261, EPI_ISL_2382262, EPI_ISL_2382263, EPI_ISL_2382265, EPI_ISL_2382266, EPI_ISL_2582996, EPI_ISL_2662664, EPI_ISL_2695760, EPI_ISL_2695761, EPI_ISL_2895767, EPI_ISL_3342250, EPI_ISL_3411812, EPI_ISL_3411813, EPI_ISL_3451493, EPI_ISL_3643960, EPI_ISL_3643961, EPI_ISL_3643969, EPI_ISL_3643974, EPI_ISL_3643980, EPI_ISL_3643981, EPI_ISL_3643982                                                                                                                                                                                                                                                                                                                                                                                                                                                                                                                                                                                                                                                                                                                                                                                                                                                                                                                                                                                                                                                                                                                                                                                                                                                                                                                                                                                                                                                                                                                                                                                                                                                                                                                                                                                                                                                                                                                                                                                                                                                                                                                                                                                                                                                | see above | KOPANONG LABORATORY                                              | National Institute for Communicable Diseases of the National Health Laboratory Service<br>Amaoko DG; Bhiman JN; Everatt J; Ismail A; Mahlangu B; Mnguni A; Mohale T; Ntuli N; Scheepers C                                                                                                                                                                                                                                                                                                                                                                                                                                                                                                                                                                                                                                                                                                                                                                              |                                                                         |
| EPI_ISL_2688547, EPI_ISL_2688548                                                                                                                                                                                                                                                                                                                                                                                                                                                                                                                                                                                                                                                                                                                                                                                                                                                                                                                                                                                                                                                                                                                                                                                                                                                                                                                                                                                                                                                                                                                                                                                                                                                                                                                                                                                                                                                                                                                                                                                                                                                                                                                                                                                                                                                                                                                                                                                                                                                                                                                                                                                   |           | KRISP, KZn Research Innovation and Sequencing Platform           | KRISP, KZn Research Innovation and Sequencing Platform<br>Giandhari Jennifer; Naidoo Yeshnee; Pillay Sureshnee; San James; Tegally Houriyah; Tshabulia Derek; Wilkinson Eduan; Yajna Ramphal; de Oliveira Tulio                                                                                                                                                                                                                                                                                                                                                                                                                                                                                                                                                                                                                                                                                                                                                        |                                                                         |
| EPI_ISL_2690056                                                                                                                                                                                                                                                                                                                                                                                                                                                                                                                                                                                                                                                                                                                                                                                                                                                                                                                                                                                                                                                                                                                                                                                                                                                                                                                                                                                                                                                                                                                                                                                                                                                                                                                                                                                                                                                                                                                                                                                                                                                                                                                                                                                                                                                                                                                                                                                                                                                                                                                                                                                                    |           | KS Health and Environmental Laboratories                         | Centers for Disease Control and Prevention Division of Viral Diseases, Pathogen Discovery<br>Alison Laufer Halpin; Ben L. Rambo-Martin; Clinton R. Paden; Dakota Howard; Darlene Wagner; Dave Wentworth; Dhvani Batra; Jasmine Padilla; Justin Lee; Katie Dillon; Krista Queen; Kristen Knipe; Kristine Lacek; Mark Burrroughs; Matthew Schmerer; Mili Sheth; Peter Cook; Sam Shepard; Sarah Nobles; Shoshona Le; Suxiang Tong; Vivien Dugan; Yvette Unoramhli                                                                                                                                                                                                                                                                                                                                                                                                                                                                                                         |                                                                         |
| EPI_ISL_4174530                                                                                                                                                                                                                                                                                                                                                                                                                                                                                                                                                                                                                                                                                                                                                                                                                                                                                                                                                                                                                                                                                                                                                                                                                                                                                                                                                                                                                                                                                                                                                                                                                                                                                                                                                                                                                                                                                                                                                                                                                                                                                                                                                                                                                                                                                                                                                                                                                                                                                                                                                                                                    |           | KSL Diagnostics                                                  | University at Buffalo Genomics and Bioinformatics Core<br>Alyssa Pohlman; Amanda Boccolucci; Brandon Marzullo; Donald Yergeau; Jennifer Surtees; Jonathan Bard; Natalie Lamb; Norma Nowak                                                                                                                                                                                                                                                                                                                                                                                                                                                                                                                                                                                                                                                                                                                                                                              |                                                                         |
| EPI_ISL_2403871, EPI_ISL_2403872, EPI_ISL_2403873, EPI_ISL_2403874, EPI_ISL_2403875, EPI_ISL_2403876, EPI_ISL_2403877, EPI_ISL_2403878, EPI_ISL_2403879, EPI_ISL_2403881, EPI_ISL_2403937, EPI_ISL_2403938, EPI_ISL_2403951, EPI_ISL_2403957, EPI_ISL_2403992, EPI_ISL_2403993, EPI_ISL_2403998, EPI_ISL_2404000, EPI_ISL_2404050, EPI_ISL_2404064, EPI_ISL_2404069, EPI_ISL_2404070, EPI_ISL_2404071, EPI_ISL_2404072, EPI_ISL_2404080, EPI_ISL_2404081, EPI_ISL_2404085, EPI_ISL_2404199, EPI_ISL_2404200, EPI_ISL_2404623, EPI_ISL_2425081, EPI_ISL_2425246, EPI_ISL_2425259, EPI_ISL_2425260, EPI_ISL_2425312, EPI_ISL_2425313, EPI_ISL_2425314, EPI_ISL_2425315, EPI_ISL_2425320, EPI_ISL_2425321, EPI_ISL_2425322, EPI_ISL_2425323, EPI_ISL_2425324, EPI_ISL_2425325, EPI_ISL_2726326, EPI_ISL_2726327, EPI_ISL_2726328, EPI_ISL_2726330, EPI_ISL_2726331, EPI_ISL_2726332, EPI_ISL_2726333, EPI_ISL_2726334, EPI_ISL_2726336, EPI_ISL_2726337, EPI_ISL_2726338, EPI_ISL_2726339, EPI_ISL_2726341, EPI_ISL_2726342, EPI_ISL_2726506, EPI_ISL_2726508, EPI_ISL_2726512, EPI_ISL_2726513, EPI_ISL_2840514, EPI_ISL_2840516, EPI_ISL_2840517, EPI_ISL_2840518, EPI_ISL_2840519, EPI_ISL_2840520, EPI_ISL_2840521, EPI_ISL_2840522, EPI_ISL_2840523, EPI_ISL_2840524, EPI_ISL_2840525, EPI_ISL_2840526, EPI_ISL_2840527, EPI_ISL_2840528, EPI_ISL_2840529, EPI_ISL_2840530, EPI_ISL_2840531, EPI_ISL_2840532, EPI_ISL_2840533, EPI_ISL_2840534, EPI_ISL_2840535, EPI_ISL_2840536, EPI_ISL_2840537, EPI_ISL_2840538, EPI_ISL_2840539, EPI_ISL_2840540, EPI_ISL_2840541, EPI_ISL_2840542, EPI_ISL_2840543, EPI_ISL_2840544, EPI_ISL_2840545, EPI_ISL_2840546, EPI_ISL_2840547, EPI_ISL_2840548, EPI_ISL_2840549, EPI_ISL_2840550, EPI_ISL_2840551, EPI_ISL_2840552, EPI_ISL_2840553, EPI_ISL_2840554, EPI_ISL_2840555, EPI_ISL_2840556, EPI_ISL_2840557, EPI_ISL_2840558, EPI_ISL_2840559, EPI_ISL_2840560, EPI_ISL_2840561, EPI_ISL_2840562, EPI_ISL_2840563, EPI_ISL_2840564, EPI_ISL_2840565, EPI_ISL_2840566, EPI_ISL_2840567, EPI_ISL_2840568, EPI_ISL_2840569, EPI_ISL_2840570, EPI_ISL_2840571, EPI_ISL_2840572, EPI_ISL_2840573, EPI_ISL_2840574, EPI_ISL_2840575, EPI_ISL_2840576, EPI_ISL_2840577, EPI_ISL_2840578, EPI_ISL_2840579, EPI_ISL_2840580, EPI_ISL_2840581, EPI_ISL_2840582, EPI_ISL_2840583, EPI_ISL_2840584, EPI_ISL_2840585, EPI_ISL_2840586, EPI_ISL_2840587, EPI_ISL_2840588, EPI_ISL_2840589, EPI_ISL_2840590, EPI_ISL_2840591, EPI_ISL_2840592, EPI_ISL_2840593, EPI_ISL_2840594, EPI_ISL_2840595, EPI_ISL_2840596, EPI_ISL_2840597, EPI_ISL_2840598, EPI_ISL_2840599, EPI_ISL_2840600 | see above | KU Leuven, Rega Institute, Clinical and Epidemiological Virology | KU Leuven, Rega Institute, Clinical and Epidemiological Virology                                                                                                                                                                                                                                                                                                                                                                                                                                                                                                                                                                                                                                                                                                                                                                                                                                                                                                       | Bert Vanmechelen; Joan Marti-Carreras; Piet Maes; Tony Wawina-Bokalanga |
| EPI_ISL_4714666, EPI_ISL_4715057, EPI_ISL_5544044, EPI_ISL_5544065, EPI_ISL_5544072                                                                                                                                                                                                                                                                                                                                                                                                                                                                                                                                                                                                                                                                                                                                                                                                                                                                                                                                                                                                                                                                                                                                                                                                                                                                                                                                                                                                                                                                                                                                                                                                                                                                                                                                                                                                                                                                                                                                                                                                                                                                                                                                                                                                                                                                                                                                                                                                                                                                                                                                |           | Kairos Diagnostics Laboratory                                    | Philippine Genome Center<br>Alethea R. de Guzman; Anna Ong-Lim; Arianne A. Zamora; Benedict A. Maralit; Carlo M. Lapid; Celia Carlos; Cynthia P. Saloma; Devon Ray Pacial; Diomedes A. Carño; Edsel Maurice Salvana; El King D. Morado; Elcid Aaron R. Pangilinan; Eva Maria Cutiongco-de la Paz; Francis A. Tablizo; Henrietta Marie Rodriguez; Jaime C. Montoya; Jan Michael C. Yap; Jarvin E. Nipales; Jo-Hannah S. Llames; John Q. Wong; Joshua Gregor A. Dizon; Juan Antonio R. Magalang; Karol Sophia Agape R. Padilla; Kenneth M. Kim; Kris P. Punayag; Kristina Patriz Dela Cruz; Lindsay Clare D.L. Carandang; Ma. Exanill Planting; Marc Edsel C. Ayes; Maria Rosario Singh-Vergeire; Maria Sofia L. Yangzon; Marielle M. Gamboa; Marissa Alejandria; Niña Francesca Bustamante; Razel Nikka M. Hao; Renato Jacinto Q. Mantaring; Rianna Patricia S. Cruz; Shieila Mae M. Araiza; Yvonne Valerie Austria; Zipporah Mariebelle R. Enriquez; Zryel V. Molejjon |                                                                         |
| EPI_ISL_3561499                                                                                                                                                                                                                                                                                                                                                                                                                                                                                                                                                                                                                                                                                                                                                                                                                                                                                                                                                                                                                                                                                                                                                                                                                                                                                                                                                                                                                                                                                                                                                                                                                                                                                                                                                                                                                                                                                                                                                                                                                                                                                                                                                                                                                                                                                                                                                                                                                                                                                                                                                                                                    |           | Kaiser Permanente NW Reginal Lab                                 | OHSU MM Lab<br>Yun Wu                                                                                                                                                                                                                                                                                                                                                                                                                                                                                                                                                                                                                                                                                                                                                                                                                                                                                                                                                  |                                                                         |
| EPI_ISL_2662929                                                                                                                                                                                                                                                                                                                                                                                                                                                                                                                                                                                                                                                                                                                                                                                                                                                                                                                                                                                                                                                                                                                                                                                                                                                                                                                                                                                                                                                                                                                                                                                                                                                                                                                                                                                                                                                                                                                                                                                                                                                                                                                                                                                                                                                                                                                                                                                                                                                                                                                                                                                                    |           | Kaleida Health Laboratories                                      | University at Buffalo Genomics and Bioinformatics Core<br>Alyssa Pohlman; Amanda Boccolucci; Brandon Marzullo; Donald Yergeau; Jennifer Surtees; Jonathan Bard; Natalie Lamb; Norma Nowak                                                                                                                                                                                                                                                                                                                                                                                                                                                                                                                                                                                                                                                                                                                                                                              |                                                                         |
| EPI_ISL_2443143, EPI_ISL_2443194                                                                                                                                                                                                                                                                                                                                                                                                                                                                                                                                                                                                                                                                                                                                                                                                                                                                                                                                                                                                                                                                                                                                                                                                                                                                                                                                                                                                                                                                                                                                                                                                                                                                                                                                                                                                                                                                                                                                                                                                                                                                                                                                                                                                                                                                                                                                                                                                                                                                                                                                                                                   |           | Kansas Health and Environmental Lab                              | Kansas Health and Environmental Lab<br>Ben Olsen; Jonathan Barnell; Katherine Wiggins; Mike Grose; and Phil Adam                                                                                                                                                                                                                                                                                                                                                                                                                                                                                                                                                                                                                                                                                                                                                                                                                                                       |                                                                         |
| EPI_ISL_2365961                                                                                                                                                                                                                                                                                                                                                                                                                                                                                                                                                                                                                                                                                                                                                                                                                                                                                                                                                                                                                                                                                                                                                                                                                                                                                                                                                                                                                                                                                                                                                                                                                                                                                                                                                                                                                                                                                                                                                                                                                                                                                                                                                                                                                                                                                                                                                                                                                                                                                                                                                                                                    |           | Karolinska University Hospital                                   | Karolinska University Hospital<br>Annelie Bjerkner; Isak Sylvin; Jan Albert; Karolina Ininbergs; Lina Guerra Blomqvist; Lynda Eneh; Martin Ekman; Martina Wahlund; Robert Dyrdak; Sandra Broddesson; Tanja Normark; Tobias Allander; Valtteri Wirta; Zhibing Yun                                                                                                                                                                                                                                                                                                                                                                                                                                                                                                                                                                                                                                                                                                       |                                                                         |
| EPI_ISL_2897441, EPI_ISL_2897444, EPI_ISL_2898049, EPI_ISL_2898042, EPI_ISL_2898049, EPI_ISL_2898259, EPI_ISL_2898272, EPI_ISL_2898769                                                                                                                                                                                                                                                                                                                                                                                                                                                                                                                                                                                                                                                                                                                                                                                                                                                                                                                                                                                                                                                                                                                                                                                                                                                                                                                                                                                                                                                                                                                                                                                                                                                                                                                                                                                                                                                                                                                                                                                                                                                                                                                                                                                                                                                                                                                                                                                                                                                                             |           | Karolinska University Hospital                                   | Karolinska University Hospital<br>Annelie Bjerkner; Isak Sylvin; Jan Albert; Karolina Ininbergs; Lina Guerra Blomqvist; Lynda Eneh; Martin Ekman; Martina Wahlund; Robert Dyrdak; Sandra Broddesson; Tanja Normark; Tobias Allander; Valtteri Wirta; Zhibing Yun                                                                                                                                                                                                                                                                                                                                                                                                                                                                                                                                                                                                                                                                                                       |                                                                         |
| EPI_ISL_2898369, EPI_ISL_2898387, EPI_ISL_3461970, EPI_ISL_6308198, EPI_ISL_6308232, EPI_ISL_6324703, EPI_ISL_6324708, EPI_ISL_6343184, EPI_ISL_6373949, EPI_ISL_6374200, EPI_ISL_6374707, EPI_ISL_6374782, EPI_ISL_6374795, EPI_ISL_6374831, EPI_ISL_6374836, EPI_ISL_6374956, EPI_ISL_6374972, EPI_ISL_6374998, EPI_ISL_6375189, EPI_ISL_6375201, EPI_ISL_6375206, EPI_ISL_6375220, EPI_ISL_6375229, EPI_ISL_6375309, EPI_ISL_6375365, EPI_ISL_6375372, EPI_ISL_6375377, EPI_ISL_6375380, EPI_ISL_6375381, EPI_ISL_6375430, EPI_ISL_6375455, EPI_ISL_6375463, EPI_ISL_6375576, EPI_ISL_6375580, EPI_ISL_6375585, EPI_ISL_6377034, EPI_ISL_6377070, EPI_ISL_6563323, EPI_ISL_6563328, EPI_ISL_6563346, EPI_ISL_6563350, EPI_ISL_6563567, EPI_ISL_6563568, EPI_ISL_6563600, EPI_ISL_6563943, EPI_ISL_6564020, EPI_ISL_6564054, EPI_ISL_6564266, EPI_ISL_6564470, EPI_ISL_6564536, EPI_ISL_6564554                                                                                                                                                                                                                                                                                                                                                                                                                                                                                                                                                                                                                                                                                                                                                                                                                                                                                                                                                                                                                                                                                                                                                                                                                                                                                                                                                                                                                                                                                                                                                                                                                                                                                                                  | see above | Karolinska University Hospital Solna                             | Karolinska University Hospital<br>Annelie Bjerkner; Isak Sylvin; Jan Albert; Karolina Ininbergs; Lina Guerra Blomqvist; Lynda Eneh; Martin Ekman; Martina Wahlund; Robert Dyrdak; Sandra Broddesson; Tanja Normark; Tobias Allander; Valtteri Wirta; Zhibing Yun                                                                                                                                                                                                                                                                                                                                                                                                                                                                                                                                                                                                                                                                                                       |                                                                         |
| EPI_ISL_2648239, EPI_ISL_2820290, EPI_ISL_2820310, EPI_ISL_2820388                                                                                                                                                                                                                                                                                                                                                                                                                                                                                                                                                                                                                                                                                                                                                                                                                                                                                                                                                                                                                                                                                                                                                                                                                                                                                                                                                                                                                                                                                                                                                                                                                                                                                                                                                                                                                                                                                                                                                                                                                                                                                                                                                                                                                                                                                                                                                                                                                                                                                                                                                 |           | Kasane Primary Hospital Laboratory                               | Botswana Harvard HIV Reference Laboratory<br>Agnes Karutswaeng; Boitumelo Zuze; Botshelo Radibe; Dorcas Maruapula; Joseph Makhema; Keoratile Ntshambisa; Legodile Kooepile; Madisa Mine; Mosepele Mosepele; Ontlametse T. Bareng; Roger Shapiro; Rose Munyere; Shahin Lockman; Sikhulile Moyo; Simani Gaseitsiwe; Thongbotho Mphoyakgosi; Wonderful T. Choga                                                                                                                                                                                                                                                                                                                                                                                                                                                                                                                                                                                                           |                                                                         |
| EPI_ISL_2812576, EPI_ISL_2854053                                                                                                                                                                                                                                                                                                                                                                                                                                                                                                                                                                                                                                                                                                                                                                                                                                                                                                                                                                                                                                                                                                                                                                                                                                                                                                                                                                                                                                                                                                                                                                                                                                                                                                                                                                                                                                                                                                                                                                                                                                                                                                                                                                                                                                                                                                                                                                                                                                                                                                                                                                                   |           | Kemaman Hospital                                                 | Institute for Medical Research, Infectious Disease Research Centre, National Institutes of Health, Ministry of Health Malaysia<br>Anasir MI; Azizan MA; Kamel K; Mohd Zawawi Z; Ramly N; Robert F; Suppiah J; Thayan R                                                                                                                                                                                                                                                                                                                                                                                                                                                                                                                                                                                                                                                                                                                                                 |                                                                         |
| EPI_ISL_2375933                                                                                                                                                                                                                                                                                                                                                                                                                                                                                                                                                                                                                                                                                                                                                                                                                                                                                                                                                                                                                                                                                                                                                                                                                                                                                                                                                                                                                                                                                                                                                                                                                                                                                                                                                                                                                                                                                                                                                                                                                                                                                                                                                                                                                                                                                                                                                                                                                                                                                                                                                                                                    |           | Khayeletu Clinic wc KLC                                          | NHL/UCT<br>Arash Iranzadeh; Bruna Galvao; Carolyn Williamson; Deelan Doolabh; Diana Hardie; Innocent Mudau; Kruger Marais; Lynn Tyers; Marvin Hsiao; Stephen Korsman                                                                                                                                                                                                                                                                                                                                                                                                                                                                                                                                                                                                                                                                                                                                                                                                   |                                                                         |
| EPI_ISL_5510287                                                                                                                                                                                                                                                                                                                                                                                                                                                                                                                                                                                                                                                                                                                                                                                                                                                                                                                                                                                                                                                                                                                                                                                                                                                                                                                                                                                                                                                                                                                                                                                                                                                                                                                                                                                                                                                                                                                                                                                                                                                                                                                                                                                                                                                                                                                                                                                                                                                                                                                                                                                                    |           | Kimberley                                                        | National Institute for Communicable Diseases of the National Health Laboratory Service<br>Amaoko DG; Bhiman JN; Everatt J; Ismail A; Mahlangu B; Mnguni A; Mohale T; Ntuli N; Scheepers C                                                                                                                                                                                                                                                                                                                                                                                                                                                                                                                                                                                                                                                                                                                                                                              |                                                                         |
| EPI_ISL_4891707                                                                                                                                                                                                                                                                                                                                                                                                                                                                                                                                                                                                                                                                                                                                                                                                                                                                                                                                                                                                                                                                                                                                                                                                                                                                                                                                                                                                                                                                                                                                                                                                                                                                                                                                                                                                                                                                                                                                                                                                                                                                                                                                                                                                                                                                                                                                                                                                                                                                                                                                                                                                    |           | Kimberley Laboratory                                             | National Institute for Communicable Diseases of the National Health Laboratory Service<br>Amaoko DG; Bhiman JN; Everatt J; Ismail A; Mahlangu B; Mnguni A; Mohale T; Ntuli N; Scheepers C                                                                                                                                                                                                                                                                                                                                                                                                                                                                                                                                                                                                                                                                                                                                                                              |                                                                         |
| EPI_ISL_3342357, EPI_ISL_3342390, EPI_ISL_3342405, EPI_ISL_3342406, EPI_ISL_3342408, EPI_ISL_3342417                                                                                                                                                                                                                                                                                                                                                                                                                                                                                                                                                                                                                                                                                                                                                                                                                                                                                                                                                                                                                                                                                                                                                                                                                                                                                                                                                                                                                                                                                                                                                                                                                                                                                                                                                                                                                                                                                                                                                                                                                                                                                                                                                                                                                                                                                                                                                                                                                                                                                                               |           | Kimberley laboratory                                             | National Institute for Communicable Diseases of the National Health Laboratory Service<br>Amaoko DG; Bhiman JN; Everatt J; Ismail A; Mahlangu B; Mnguni A; Mohale T; Ntuli N; Scheepers C                                                                                                                                                                                                                                                                                                                                                                                                                                                                                                                                                                                                                                                                                                                                                                              |                                                                         |
| EPI_ISL_2811874                                                                                                                                                                                                                                                                                                                                                                                                                                                                                                                                                                                                                                                                                                                                                                                                                                                                                                                                                                                                                                                                                                                                                                                                                                                                                                                                                                                                                                                                                                                                                                                                                                                                                                                                                                                                                                                                                                                                                                                                                                                                                                                                                                                                                                                                                                                                                                                                                                                                                                                                                                                                    |           | Klinik Kesihatan Pasir Akar                                      | Institute for Medical Research, Infectious Disease Research Centre, National Institutes of Health, Ministry of Health Malaysia<br>Azizan MA; Kamel K; Mohd Zawawi Z; Ramly N; Robert F; Suppiah J; Thayan R                                                                                                                                                                                                                                                                                                                                                                                                                                                                                                                                                                                                                                                                                                                                                            |                                                                         |
| EPI_ISL_2674449                                                                                                                                                                                                                                                                                                                                                                                                                                                                                                                                                                                                                                                                                                                                                                                                                                                                                                                                                                                                                                                                                                                                                                                                                                                                                                                                                                                                                                                                                                                                                                                                                                                                                                                                                                                                                                                                                                                                                                                                                                                                                                                                                                                                                                                                                                                                                                                                                                                                                                                                                                                                    |           | Klinički bolnički centar Split                                   | Hrvatski zavod za javno zdravstvo<br>Irena Tabain; Ivana Ferencak                                                                                                                                                                                                                                                                                                                                                                                                                                                                                                                                                                                                                                                                                                                                                                                                                                                                                                      |                                                                         |
| EPI_ISL_2375944, EPI_ISL_2621097, EPI_ISL_2621145                                                                                                                                                                                                                                                                                                                                                                                                                                                                                                                                                                                                                                                                                                                                                                                                                                                                                                                                                                                                                                                                                                                                                                                                                                                                                                                                                                                                                                                                                                                                                                                                                                                                                                                                                                                                                                                                                                                                                                                                                                                                                                                                                                                                                                                                                                                                                                                                                                                                                                                                                                  |           | Knysna CDC wc WLC                                                | NHL/UCT<br>Arash Iranzadeh; Bruna Galvao; Carolyn Williamson; Deelan Doolabh; Diana Hardie; Gert Marais; Innocent Mudau; Kruger Marais; Lynn Tyers; Marvin Hsiao; Stephen Korsman                                                                                                                                                                                                                                                                                                                                                                                                                                                                                                                                                                                                                                                                                                                                                                                      |                                                                         |
| EPI_ISL_2375945, EPI_ISL_2375951                                                                                                                                                                                                                                                                                                                                                                                                                                                                                                                                                                                                                                                                                                                                                                                                                                                                                                                                                                                                                                                                                                                                                                                                                                                                                                                                                                                                                                                                                                                                                                                                                                                                                                                                                                                                                                                                                                                                                                                                                                                                                                                                                                                                                                                                                                                                                                                                                                                                                                                                                                                   |           | Knysna Hospital wc KNY                                           | NHL/UCT<br>Arash Iranzadeh; Bruna Galvao; Carolyn Williamson; Deelan Doolabh; Diana Hardie; Innocent Mudau; Kruger Marais; Lynn Tyers; Marvin Hsiao; Stephen Korsman                                                                                                                                                                                                                                                                                                                                                                                                                                                                                                                                                                                                                                                                                                                                                                                                   |                                                                         |
| EPI_ISL_2547415                                                                                                                                                                                                                                                                                                                                                                                                                                                                                                                                                                                                                                                                                                                                                                                                                                                                                                                                                                                                                                                                                                                                                                                                                                                                                                                                                                                                                                                                                                                                                                                                                                                                                                                                                                                                                                                                                                                                                                                                                                                                                                                                                                                                                                                                                                                                                                                                                                                                                                                                                                                                    |           | Knysna Hospital wc KNY                                           | National Health Laboratory Service/University of Cape Town (NHL/UCT)<br>Arash Iranzadeh; Bruna Galvao; Carolyn Williamson; Deelan Doolabh; Diana Hardie; Gert Marais; Innocent Mudau; Lynn Tyers; Marvin Hsiao; Stephen Korsman                                                                                                                                                                                                                                                                                                                                                                                                                                                                                                                                                                                                                                                                                                                                        |                                                                         |
| EPI_ISL_3333593                                                                                                                                                                                                                                                                                                                                                                                                                                                                                                                                                                                                                                                                                                                                                                                                                                                                                                                                                                                                                                                                                                                                                                                                                                                                                                                                                                                                                                                                                                                                                                                                                                                                                                                                                                                                                                                                                                                                                                                                                                                                                                                                                                                                                                                                                                                                                                                                                                                                                                                                                                                                    |           | Kota Bharu Public Health Laboratory                              | Institute for Medical Research, Infectious Disease Research Centre, National Institutes of Health, Ministry of Health Malaysia<br>Anasir MI; Azizan MA; Kamel K; Mohd Zawawi Z; Ramly N; Robert F; Suppiah J; Thayan R                                                                                                                                                                                                                                                                                                                                                                                                                                                                                                                                                                                                                                                                                                                                                 |                                                                         |
| EPI_ISL_4101547                                                                                                                                                                                                                                                                                                                                                                                                                                                                                                                                                                                                                                                                                                                                                                                                                                                                                                                                                                                                                                                                                                                                                                                                                                                                                                                                                                                                                                                                                                                                                                                                                                                                                                                                                                                                                                                                                                                                                                                                                                                                                                                                                                                                                                                                                                                                                                                                                                                                                                                                                                                                    |           | Kota Marudu District Health Office                               | Institute for Medical Research, Infectious Disease Research Centre, National Institutes of Health, Ministry of Health Malaysia<br>Ahmad FA; Ahmad Fazilah NA; Anasir MI; Azizan MA; Kamel K; Mohd Zawawi Z; Norhisham SN; Ramly N; Robert F; Suppiah J; Thayan R                                                                                                                                                                                                                                                                                                                                                                                                                                                                                                                                                                                                                                                                                                       |                                                                         |
| EPI_ISL_2375946                                                                                                                                                                                                                                                                                                                                                                                                                                                                                                                                                                                                                                                                                                                                                                                                                                                                                                                                                                                                                                                                                                                                                                                                                                                                                                                                                                                                                                                                                                                                                                                                                                                                                                                                                                                                                                                                                                                                                                                                                                                                                                                                                                                                                                                                                                                                                                                                                                                                                                                                                                                                    |           | Kranshoek Clinic wc KSH                                          | NHL/UCT<br>Arash Iranzadeh; Bruna Galvao; Carolyn Williamson; Deelan Doolabh; Diana Hardie; Innocent Mudau; Kruger Marais; Lynn Tyers; Marvin Hsiao; Stephen Korsman                                                                                                                                                                                                                                                                                                                                                                                                                                                                                                                                                                                                                                                                                                                                                                                                   |                                                                         |
| EPI_ISL_3120236                                                                                                                                                                                                                                                                                                                                                                                                                                                                                                                                                                                                                                                                                                                                                                                                                                                                                                                                                                                                                                                                                                                                                                                                                                                                                                                                                                                                                                                                                                                                                                                                                                                                                                                                                                                                                                                                                                                                                                                                                                                                                                                                                                                                                                                                                                                                                                                                                                                                                                                                                                                                    |           | Kuala Pilah Health District Office                               | Institute for Medical Research, Infectious Disease Research Centre, National Institutes of Health, Ministry of Health Malaysia<br>Anasir MI; Azizan MA; Kamel K; Mohd Zawawi Z; Ramly N; Robert F; Suppiah J; Thayan R                                                                                                                                                                                                                                                                                                                                                                                                                                                                                                                                                                                                                                                                                                                                                 |                                                                         |
| EPI_ISL_4096812                                                                                                                                                                                                                                                                                                                                                                                                                                                                                                                                                                                                                                                                                                                                                                                                                                                                                                                                                                                                                                                                                                                                                                                                                                                                                                                                                                                                                                                                                                                                                                                                                                                                                                                                                                                                                                                                                                                                                                                                                                                                                                                                                                                                                                                                                                                                                                                                                                                                                                                                                                                                    |           | Kudat District Health Office                                     | Institute for Medical Research, Infectious Disease Research Centre, National Institutes of Health, Ministry of Health Malaysia<br>Ahmad FA; Ahmad Fazilah NA; Anasir MI; Azizan MA; Kamel K; Mohd Zawawi Z; Norhisham SN; Ramly N; Robert F; Suppiah J; Thayan R                                                                                                                                                                                                                                                                                                                                                                                                                                                                                                                                                                                                                                                                                                       |                                                                         |
| EPI_ISL_2649991                                                                                                                                                                                                                                                                                                                                                                                                                                                                                                                                                                                                                                                                                                                                                                                                                                                                                                                                                                                                                                                                                                                                                                                                                                                                                                                                                                                                                                                                                                                                                                                                                                                                                                                                                                                                                                                                                                                                                                                                                                                                                                                                                                                                                                                                                                                                                                                                                                                                                                                                                                                                    |           | Kudat Hospital                                                   | Institute for Medical Research, Infectious Disease Research Centre, National Institutes of Health, Ministry of Health Malaysia<br>Azizan MA; Kamel K; Mohd Zawawi Z; Ramly N; Robert F; Suppiah J; Thayan R                                                                                                                                                                                                                                                                                                                                                                                                                                                                                                                                                                                                                                                                                                                                                            |                                                                         |
| EPI_ISL_2802116                                                                                                                                                                                                                                                                                                                                                                                                                                                                                                                                                                                                                                                                                                                                                                                                                                                                                                                                                                                                                                                                                                                                                                                                                                                                                                                                                                                                                                                                                                                                                                                                                                                                                                                                                                                                                                                                                                                                                                                                                                                                                                                                                                                                                                                                                                                                                                                                                                                                                                                                                                                                    |           | Kuils river                                                      | NHL/UCT<br>Arash Iranzadeh; Bruna Galvao; Carolyn Williamson; Deelan Doolabh; Diana Hardie; Gert Marais; Innocent Mudau; Lynn Tyers; Marvin Hsiao; Stephen Korsman                                                                                                                                                                                                                                                                                                                                                                                                                                                                                                                                                                                                                                                                                                                                                                                                     |                                                                         |
| EPI_ISL_5524579                                                                                                                                                                                                                                                                                                                                                                                                                                                                                                                                                                                                                                                                                                                                                                                                                                                                                                                                                                                                                                                                                                                                                                                                                                                                                                                                                                                                                                                                                                                                                                                                                                                                                                                                                                                                                                                                                                                                                                                                                                                                                                                                                                                                                                                                                                                                                                                                                                                                                                                                                                                                    |           | Kuruman Hospital                                                 | NHL/UCT<br>Arash Iranzadeh; Bruna Galvao; Carolyn Williamson; Deelan Doolabh; Diana Hardie; Gert Marais; Innocent Mudau; Lynn Tyers; Marvin Hsiao; Rageema Joseph; Stephen Korsman                                                                                                                                                                                                                                                                                                                                                                                                                                                                                                                                                                                                                                                                                                                                                                                     |                                                                         |





|                                                                                                                                                                                                                                                                                                                                                                                                                                                                                                                                                                                                                                                                                                                                                                                                                                                                                                                                                                                                                                                                                              |                                                                                                       |                                                                                                                                            |                                                                                                                                                                                                                                                                                                                                                                                                                                                                                                                                                                      |
|----------------------------------------------------------------------------------------------------------------------------------------------------------------------------------------------------------------------------------------------------------------------------------------------------------------------------------------------------------------------------------------------------------------------------------------------------------------------------------------------------------------------------------------------------------------------------------------------------------------------------------------------------------------------------------------------------------------------------------------------------------------------------------------------------------------------------------------------------------------------------------------------------------------------------------------------------------------------------------------------------------------------------------------------------------------------------------------------|-------------------------------------------------------------------------------------------------------|--------------------------------------------------------------------------------------------------------------------------------------------|----------------------------------------------------------------------------------------------------------------------------------------------------------------------------------------------------------------------------------------------------------------------------------------------------------------------------------------------------------------------------------------------------------------------------------------------------------------------------------------------------------------------------------------------------------------------|
| EPI_ISL_2709304                                                                                                                                                                                                                                                                                                                                                                                                                                                                                                                                                                                                                                                                                                                                                                                                                                                                                                                                                                                                                                                                              |                                                                                                       |                                                                                                                                            |                                                                                                                                                                                                                                                                                                                                                                                                                                                                                                                                                                      |
| EPI_ISL_2386811, EPI_ISL_2386825, EPI_ISL_2386841, EPI_ISL_2389926, EPI_ISL_2389929, EPI_ISL_2389932, EPI_ISL_2389934, EPI_ISL_2389937, EPI_ISL_2389941, EPI_ISL_2389951, EPI_ISL_2389957, EPI_ISL_2389960, EPI_ISL_2635538, EPI_ISL_2635908, EPI_ISL_2635920, EPI_ISL_2678394, EPI_ISL_2678397, EPI_ISL_2845707, EPI_ISL_2845735, EPI_ISL_2845796, EPI_ISL_2845806                                                                                                                                                                                                                                                                                                                                                                                                                                                                                                                                                                                                                                                                                                                          | see above                                                                                             | Labor Becker & Kollegen (Standort München)                                                                                                 | Robert Koch Institute                                                                                                                                                                                                                                                                                                                                                                                                                                                                                                                                                |
| EPI_ISL_5946946                                                                                                                                                                                                                                                                                                                                                                                                                                                                                                                                                                                                                                                                                                                                                                                                                                                                                                                                                                                                                                                                              | Labor Berlin Charité Vivantes GmbH / Institut für Virologie                                           | Charité Universitätsmedizin Berlin, Institut für Virologie/Labor Berlin                                                                    | Barbara Mühlemann; Christian Drosten; Christine Stephan; Peter Menzel; Rolf Schwarzer; Terry Jones; Victor M Corman                                                                                                                                                                                                                                                                                                                                                                                                                                                  |
| EPI_ISL_3947624                                                                                                                                                                                                                                                                                                                                                                                                                                                                                                                                                                                                                                                                                                                                                                                                                                                                                                                                                                                                                                                                              | Labor Dr. Fenner und Kollegen                                                                         | Heinrich Pette Institute, Leibniz Institute for Experimental Virology                                                                      | Adam Grundhoff; Alexis Robitaille; Johannes Knobloch; Martin Aepfelbacher; Nicole Fischer; Thomas Günther                                                                                                                                                                                                                                                                                                                                                                                                                                                            |
| EPI_ISL_2389351, EPI_ISL_2471047, EPI_ISL_2471057                                                                                                                                                                                                                                                                                                                                                                                                                                                                                                                                                                                                                                                                                                                                                                                                                                                                                                                                                                                                                                            | Labor Dr. Heidrich & Kollegen MVZ GmbH Hamburg                                                        | Robert Koch Institute                                                                                                                      |                                                                                                                                                                                                                                                                                                                                                                                                                                                                                                                                                                      |
| EPI_ISL_2472547                                                                                                                                                                                                                                                                                                                                                                                                                                                                                                                                                                                                                                                                                                                                                                                                                                                                                                                                                                                                                                                                              | Labor Dr. Spranger                                                                                    | Robert Koch Institute                                                                                                                      |                                                                                                                                                                                                                                                                                                                                                                                                                                                                                                                                                                      |
| EPI_ISL_2386546, EPI_ISL_2631828, EPI_ISL_2845282                                                                                                                                                                                                                                                                                                                                                                                                                                                                                                                                                                                                                                                                                                                                                                                                                                                                                                                                                                                                                                            | Labor Dr. Wisplinghoff - Köln                                                                         | Robert Koch Institute                                                                                                                      |                                                                                                                                                                                                                                                                                                                                                                                                                                                                                                                                                                      |
| EPI_ISL_2761710                                                                                                                                                                                                                                                                                                                                                                                                                                                                                                                                                                                                                                                                                                                                                                                                                                                                                                                                                                                                                                                                              | Labor Mönchengladbach MVZ Dr. Stein + Kollegen GbR                                                    | Robert Koch Institute                                                                                                                      |                                                                                                                                                                                                                                                                                                                                                                                                                                                                                                                                                                      |
| EPI_ISL_2408469                                                                                                                                                                                                                                                                                                                                                                                                                                                                                                                                                                                                                                                                                                                                                                                                                                                                                                                                                                                                                                                                              | Labor Team W Ag                                                                                       | Clinical Bacteriology                                                                                                                      | Adrian Egli; Alfredo Mari; Fanny Wegner; Hans Hirsch; Helena MB Seth-Smith; Julia Bielicki; Karoline Leuzinger; Manuel Battegay; Tim Roloff                                                                                                                                                                                                                                                                                                                                                                                                                          |
| EPI_ISL_2386796, EPI_ISL_2472859                                                                                                                                                                                                                                                                                                                                                                                                                                                                                                                                                                                                                                                                                                                                                                                                                                                                                                                                                                                                                                                             | Labor ZOTZ KLIMAS; MVZ Düsseldorf-Centrum                                                             | Robert Koch Institute                                                                                                                      |                                                                                                                                                                                                                                                                                                                                                                                                                                                                                                                                                                      |
| EPI_ISL_2388210, EPI_ISL_2633408, EPI_ISL_2633420, EPI_ISL_2633452, EPI_ISL_2633457, EPI_ISL_2636891                                                                                                                                                                                                                                                                                                                                                                                                                                                                                                                                                                                                                                                                                                                                                                                                                                                                                                                                                                                         | Laborarztpraxis Osnabrück                                                                             | Robert Koch Institute                                                                                                                      |                                                                                                                                                                                                                                                                                                                                                                                                                                                                                                                                                                      |
| EPI_ISL_2984040                                                                                                                                                                                                                                                                                                                                                                                                                                                                                                                                                                                                                                                                                                                                                                                                                                                                                                                                                                                                                                                                              | Laboratoire Ana-L                                                                                     | Department of Virology, Henri Mondor University Hospital, Assistance Publique Hôpitaux de Paris, Université Paris-Est Créteil, INSERM U955 | Alexandre Soulier; Christophe Rodriguez; Elisabeth Trawinski; Guillaume Gricourt; Jean-Michel Pawlotsky; Melissa N'Debi; Slim Fourati; Vanessa Demontant                                                                                                                                                                                                                                                                                                                                                                                                             |
| EPI_ISL_2464780                                                                                                                                                                                                                                                                                                                                                                                                                                                                                                                                                                                                                                                                                                                                                                                                                                                                                                                                                                                                                                                                              | Laboratoire CBM 25 TERRE ROUGE                                                                        | Department of Virology, Henri Mondor University Hospital, Assistance Publique Hôpitaux de Paris, Université Paris-Est Créteil, INSERM U955 | Alexandre Soulier; Christophe Rodriguez; Elisabeth Trawinski; Guillaume Gricourt; Jean-Michel Pawlotsky; Melissa N'Debi; Slim Fourati; Vanessa Demontant                                                                                                                                                                                                                                                                                                                                                                                                             |
| EPI_ISL_2835991                                                                                                                                                                                                                                                                                                                                                                                                                                                                                                                                                                                                                                                                                                                                                                                                                                                                                                                                                                                                                                                                              | Laboratoire Carage                                                                                    | Institut Pasteur de la Guyane                                                                                                              | Anne Lavergne; Antoine Enfissi; Arielle Salmier; Dominique Rousset                                                                                                                                                                                                                                                                                                                                                                                                                                                                                                   |
| EPI_ISL_2637767, EPI_ISL_2795701, EPI_ISL_2795732, EPI_ISL_2878494, EPI_ISL_2983849                                                                                                                                                                                                                                                                                                                                                                                                                                                                                                                                                                                                                                                                                                                                                                                                                                                                                                                                                                                                          | Laboratoire LÉNYS                                                                                     | Department of Virology, Henri Mondor University Hospital, Assistance Publique Hôpitaux de Paris, Université Paris-Est Créteil, INSERM U955 | Alexandre Soulier; Christophe Rodriguez; Elisabeth Trawinski; Guillaume Gricourt; Jean-Michel Pawlotsky; Melissa N'Debi; Slim Fourati; Vanessa Demontant                                                                                                                                                                                                                                                                                                                                                                                                             |
| EPI_ISL_3461145                                                                                                                                                                                                                                                                                                                                                                                                                                                                                                                                                                                                                                                                                                                                                                                                                                                                                                                                                                                                                                                                              | Laboratoire Professeur Daniel GAHOUMA (LPDG)                                                          | Centre de Recherches Médicales de Lambaréné (CERMEL)                                                                                       | ; Ayong More; Bertrand Lell; Davy Leger Mouangala; Davy-Christ Angoune Ndong; Elyvre Mbongo-Nkama; Emilio Skarwan; Georgelin Nguema Ondo; Guy Paterne Malonga Mbembo; Guy Stéphane Padzys; Gédéon Prince Manouana; Jean Bernard Lekana-Douki; Joël-Fleury Djoba Siawaya and Ayola Akim Adegnika; Kevin Zang Ella; Ludovic Mewono; Moustapha Nzamba Maloum; Noé Patrick Mbondoukwe; Rodrigue Bikangui; Rodrigue Mintsa Nguema; Sam O'neilla Oye Binongo; Samira Zoa Assoumou; Sandrine Zeh Mfor; Srinivas reddy Pallerla; Steffen Borrmann; Thirumalaisamy P. Velavan |
| EPI_ISL_2374000, EPI_ISL_2374001, EPI_ISL_2374002, EPI_ISL_2374003, EPI_ISL_2374004, EPI_ISL_2374005, EPI_ISL_2374006, EPI_ISL_2374007, EPI_ISL_2374008, EPI_ISL_2374010, EPI_ISL_2374011, EPI_ISL_2374013, EPI_ISL_2374014, EPI_ISL_2374015, EPI_ISL_2374016, EPI_ISL_2374017, EPI_ISL_2374018, EPI_ISL_2374019, EPI_ISL_2374020, EPI_ISL_2374021, EPI_ISL_2374022, EPI_ISL_2374023, EPI_ISL_2374024, EPI_ISL_2374025, EPI_ISL_2374026, EPI_ISL_2374028, EPI_ISL_2374029, EPI_ISL_2374030, EPI_ISL_2374031, EPI_ISL_2374032, EPI_ISL_2374033, EPI_ISL_2374034, EPI_ISL_2374035, EPI_ISL_2374036, EPI_ISL_2374037, EPI_ISL_2374039, EPI_ISL_2374040, EPI_ISL_2374041, EPI_ISL_2374042, EPI_ISL_2374043, EPI_ISL_2374044, EPI_ISL_2374045, EPI_ISL_2374046, EPI_ISL_2374047, EPI_ISL_2374049, EPI_ISL_2374050, EPI_ISL_2374052, EPI_ISL_2374053, EPI_ISL_2406499, EPI_ISL_2406502, EPI_ISL_2533826                                                                                                                                                                                            | see above                                                                                             | Laboratoire Virologie Saint Louis APHP                                                                                                     | Constance Delauguerre; Jérôme Le Goff; Linda Feghoul; Marie Laure Chaix; Marie Laure Néré; Maud Salmona; Severine Mercier Delarue; Sophia Achaibou                                                                                                                                                                                                                                                                                                                                                                                                                   |
| EPI_ISL_5135696, EPI_ISL_5135942, EPI_ISL_5135956, EPI_ISL_5136191, EPI_ISL_5136239, EPI_ISL_5136447                                                                                                                                                                                                                                                                                                                                                                                                                                                                                                                                                                                                                                                                                                                                                                                                                                                                                                                                                                                         | Laboratoire de Virologie - CHU François Mitterrand - Dijon - France                                   | INSERM U1231 - Equipe GAD                                                                                                                  | Ali SI-MOHAMMED; Hélène GIRAUDON; Lionel PIROTH; Yannis DUFFOURD                                                                                                                                                                                                                                                                                                                                                                                                                                                                                                     |
| EPI_ISL_2970554, EPI_ISL_2976307, EPI_ISL_3143040, EPI_ISL_3143041, EPI_ISL_3143042, EPI_ISL_3143043, EPI_ISL_3143044, EPI_ISL_3143045, EPI_ISL_3143414, EPI_ISL_3143415, EPI_ISL_3143416, EPI_ISL_3458129, EPI_ISL_3458130, EPI_ISL_3458175, EPI_ISL_3458271, EPI_ISL_3458278, EPI_ISL_3458281, EPI_ISL_3458289, EPI_ISL_3458300, EPI_ISL_3458316, EPI_ISL_3458348, EPI_ISL_3458352, EPI_ISL_3458359, EPI_ISL_3458361, EPI_ISL_3458362, EPI_ISL_3458363, EPI_ISL_3458395, EPI_ISL_3458399, EPI_ISL_3458406, EPI_ISL_3458416, EPI_ISL_3458475, EPI_ISL_3458480, EPI_ISL_3458575, EPI_ISL_3458866, EPI_ISL_3458873, EPI_ISL_3508429, EPI_ISL_5867815, EPI_ISL_5872851, EPI_ISL_5872877, EPI_ISL_5872913, EPI_ISL_5873098, EPI_ISL_5873136, EPI_ISL_5873244, EPI_ISL_5873273, EPI_ISL_5873503, EPI_ISL_5887665, EPI_ISL_5887853, EPI_ISL_5887872, EPI_ISL_5891525, EPI_ISL_5891530, EPI_ISL_5891540, EPI_ISL_5891590, EPI_ISL_5891622, EPI_ISL_5897843                                                                                                                                         | see above                                                                                             | Laboratoire de santé publique du Québec                                                                                                    | Guillaume Bourque; Ioannis Ragoussis; Jesse Shapiro; Mark Lathrop and Michel Roger on behalf of the CoVSeQ research group; Sandrine Moreira                                                                                                                                                                                                                                                                                                                                                                                                                          |
| EPI_ISL_2441791, EPI_ISL_2646294, EPI_ISL_2646295, EPI_ISL_2646296, EPI_ISL_2651278, EPI_ISL_2651281, EPI_ISL_2651282, EPI_ISL_2651385, EPI_ISL_2886440, EPI_ISL_2886446, EPI_ISL_2886448, EPI_ISL_2886456, EPI_ISL_2886457, EPI_ISL_2886458, EPI_ISL_2886460, EPI_ISL_2886461                                                                                                                                                                                                                                                                                                                                                                                                                                                                                                                                                                                                                                                                                                                                                                                                               | see above                                                                                             | Laboratoire du CHOR                                                                                                                        | Etienne Frumence; Marie-Christine Jaffar Bandjee; Nicolas Traversier; Sabrina Petit Genet                                                                                                                                                                                                                                                                                                                                                                                                                                                                            |
| EPI_ISL_2401081, EPI_ISL_2401090, EPI_ISL_2401115                                                                                                                                                                                                                                                                                                                                                                                                                                                                                                                                                                                                                                                                                                                                                                                                                                                                                                                                                                                                                                            | Laboratoire national de sante, Microbiology, Virology                                                 | Laboratoire national de sante, Microbiology, Microbial Genomics Platform                                                                   | Anke Wienecke-Baldacchino; Catherine Ragimbeau; Fatu Djabi; Jessica Tapp; Lise Pignon; Raoul Salmon; Tamir Abdelrahman; Trung Nguyen Nguyen                                                                                                                                                                                                                                                                                                                                                                                                                          |
| EPI_ISL_2400881, EPI_ISL_3147609, EPI_ISL_3147610, EPI_ISL_3147611, EPI_ISL_3147612, EPI_ISL_3147613, EPI_ISL_3147614, EPI_ISL_3147615, EPI_ISL_3147616, EPI_ISL_3147618, EPI_ISL_3147619, EPI_ISL_3147620                                                                                                                                                                                                                                                                                                                                                                                                                                                                                                                                                                                                                                                                                                                                                                                                                                                                                   | see above                                                                                             | Laboratoires Reunis                                                                                                                        | Anke Wienecke-Baldacchino; Bernard Weber; Catherine Ragimbeau; Elodie Solarino; Fatu Djabi; Jessica Tapp; Lise Pignon; Raoul Salmon; Tamir Abdelrahman; Virginie Jover                                                                                                                                                                                                                                                                                                                                                                                               |
| EPI_ISL_3334787                                                                                                                                                                                                                                                                                                                                                                                                                                                                                                                                                                                                                                                                                                                                                                                                                                                                                                                                                                                                                                                                              | Laboratoires Reunis, 38 Rue Hiel, 6131 Junglinster, Luxembourg                                        | Laboratoire national de sante, Microbiology, Microbial Genomics Platform                                                                   | Anke Wienecke-Baldacchino; Bernard Weber; Catherine Ragimbeau; Elodie Solarino; Fatu Djabi; Jessica Tapp; Lise Pignon; Raoul Salmon; Tamir Abdelrahman; Virginie Jover                                                                                                                                                                                                                                                                                                                                                                                               |
| EPI_ISL_2400545, EPI_ISL_2400546, EPI_ISL_2400549, EPI_ISL_2400573, EPI_ISL_2400576, EPI_ISL_2400579, EPI_ISL_2400580, EPI_ISL_2400607, EPI_ISL_2400608, EPI_ISL_2400609, EPI_ISL_2400610, EPI_ISL_2400616, EPI_ISL_2400644, EPI_ISL_2400653, EPI_ISL_2400690, EPI_ISL_2400719, EPI_ISL_2400808, EPI_ISL_3148063, EPI_ISL_3148312, EPI_ISL_3148313, EPI_ISL_3148314, EPI_ISL_3148315, EPI_ISL_3148317, EPI_ISL_3148318, EPI_ISL_3148319, EPI_ISL_3148321, EPI_ISL_3148322, EPI_ISL_3148323, EPI_ISL_3148324, EPI_ISL_3148325, EPI_ISL_3148326, EPI_ISL_3148327, EPI_ISL_3148328, EPI_ISL_3148329, EPI_ISL_3148330, EPI_ISL_3148331, EPI_ISL_3148332, EPI_ISL_3148333, EPI_ISL_3148334, EPI_ISL_3148335, EPI_ISL_3148336, EPI_ISL_3148337, EPI_ISL_3148338, EPI_ISL_3148339, EPI_ISL_3148340, EPI_ISL_3148341, EPI_ISL_3148342, EPI_ISL_3148343, EPI_ISL_3148344, EPI_ISL_3148345, EPI_ISL_3148346, EPI_ISL_3148347, EPI_ISL_3148348, EPI_ISL_3148349, EPI_ISL_3148350, EPI_ISL_3148351, EPI_ISL_3148352, EPI_ISL_3148353, EPI_ISL_3148354, EPI_ISL_3148355, EPI_ISL_3148356, EPI_ISL_3148357 | see above                                                                                             | Laboratoires d'analyses medicales - Ketterthill                                                                                            | Anke Wienecke-Baldacchino; Caroline Scheiber; Catherine Ragimbeau; Elodie Solarino; Fatu Djabi; Jessica Tapp; Lise Pignon; Raoul Salmon; Serge Vedy; Tamir Abdelrahman; Virginie Jover                                                                                                                                                                                                                                                                                                                                                                               |
| EPI_ISL_2421288, EPI_ISL_2497872, EPI_ISL_2626434, EPI_ISL_3667293                                                                                                                                                                                                                                                                                                                                                                                                                                                                                                                                                                                                                                                                                                                                                                                                                                                                                                                                                                                                                           | Laboratori de Referencia de Catalunya                                                                 | Laboratori de Referencia de Catalunya                                                                                                      | Bellosillo B.; Canal M.; Hernandez JJ.; Padilla E.; Ramirez A.; Vilas A.                                                                                                                                                                                                                                                                                                                                                                                                                                                                                             |
| EPI_ISL_2925994                                                                                                                                                                                                                                                                                                                                                                                                                                                                                                                                                                                                                                                                                                                                                                                                                                                                                                                                                                                                                                                                              | Laboratorio CQRC                                                                                      | CQRC_QUALITY CONTROL CHEMICAL BIOLOGICAL RISK_AOOR Villa Sofia Cervello Palermo                                                            | Brunacci G.; Contino F.; Di Gaudio F.                                                                                                                                                                                                                                                                                                                                                                                                                                                                                                                                |
| EPI_ISL_3275215                                                                                                                                                                                                                                                                                                                                                                                                                                                                                                                                                                                                                                                                                                                                                                                                                                                                                                                                                                                                                                                                              | Laboratorio Nacional de Salud, Ministerio de Salud Publica y Asistencia Social                        | Genomics and Proteomics Department, Gorgas Memorial Institute For Health Studies                                                           | Alexander A Martinez; Ambar Moreno; Claudia Estrada; Claudia Gonzalez V; César Roberto Conde Pereira; Jessica Gondola; Leyda Abrego; Marlene Castillo; Oris Chavarria                                                                                                                                                                                                                                                                                                                                                                                                |
| EPI_ISL_2931425                                                                                                                                                                                                                                                                                                                                                                                                                                                                                                                                                                                                                                                                                                                                                                                                                                                                                                                                                                                                                                                                              | Laboratorio de Biología Molecular. Servicio de Análisis Clínicos y Microbiología. Hospital de Sagunto | SeqCOVID-SPAIN consortium/IBV(CSIC)                                                                                                        | Agustín Irazo Tatay; Dra. Victoria Simón García; Gonzalo Llop Furquet; Noelia Lozano Rodríguez and SeqCOVID-SPAIN consortium; Sandra Moreno Marro                                                                                                                                                                                                                                                                                                                                                                                                                    |
| EPI_ISL_2602434                                                                                                                                                                                                                                                                                                                                                                                                                                                                                                                                                                                                                                                                                                                                                                                                                                                                                                                                                                                                                                                                              | Laboratorio di Genetica Medica Ospedale Belcolle                                                      | INMI Lazzaro Spallanzani IRCCS                                                                                                             | E Giombini; F Messina; F Natoni; F Santini; G Pessina; M Pallocca; M Rueca; O Butera; S Donzelli                                                                                                                                                                                                                                                                                                                                                                                                                                                                     |
| EPI_ISL_6202082                                                                                                                                                                                                                                                                                                                                                                                                                                                                                                                                                                                                                                                                                                                                                                                                                                                                                                                                                                                                                                                                              | Laboratorio di Riferimento Regionale della Sicilia Occidentale per l'Emergenza COVID-19               | Laboratorio di Riferimento Regionale della Sicilia Occidentale per l'Emergenza COVID-19                                                    | Carmelo Massimo Maida; Claudio Costantino; Daniela Di Naro; Fabio Tramuto; Francesco Vitale; Giorgio Graziano; Giulia Randazzo; Vincenzo Restivo; Walter Mazzucco                                                                                                                                                                                                                                                                                                                                                                                                    |

|                                                                                                                                                                                                                                                                                                                                                                                                                                                                                                                                                                                                                                                                                                                                                                                                                                                                                                                                                      |                                                                                                                |                                                                                                                                                                                                                                                                                                                                                                                                                                                                                                                                                                                                                                                                                                                                                                                                                                                                                                                                                                                                                                                                                                                                                                                                           |                                                                                                                                                                                                                                                                                                                                                                                                                                                                                                                                                                                                                                                                                                                                                                                                                                                                                                                                                                                             |
|------------------------------------------------------------------------------------------------------------------------------------------------------------------------------------------------------------------------------------------------------------------------------------------------------------------------------------------------------------------------------------------------------------------------------------------------------------------------------------------------------------------------------------------------------------------------------------------------------------------------------------------------------------------------------------------------------------------------------------------------------------------------------------------------------------------------------------------------------------------------------------------------------------------------------------------------------|----------------------------------------------------------------------------------------------------------------|-----------------------------------------------------------------------------------------------------------------------------------------------------------------------------------------------------------------------------------------------------------------------------------------------------------------------------------------------------------------------------------------------------------------------------------------------------------------------------------------------------------------------------------------------------------------------------------------------------------------------------------------------------------------------------------------------------------------------------------------------------------------------------------------------------------------------------------------------------------------------------------------------------------------------------------------------------------------------------------------------------------------------------------------------------------------------------------------------------------------------------------------------------------------------------------------------------------|---------------------------------------------------------------------------------------------------------------------------------------------------------------------------------------------------------------------------------------------------------------------------------------------------------------------------------------------------------------------------------------------------------------------------------------------------------------------------------------------------------------------------------------------------------------------------------------------------------------------------------------------------------------------------------------------------------------------------------------------------------------------------------------------------------------------------------------------------------------------------------------------------------------------------------------------------------------------------------------------|
| EPI_ISL_4056004                                                                                                                                                                                                                                                                                                                                                                                                                                                                                                                                                                                                                                                                                                                                                                                                                                                                                                                                      | Laboratorium Kesehatan Daerah Surabaya                                                                         | Institute of Tropical Disease, Universitas Airlangga                                                                                                                                                                                                                                                                                                                                                                                                                                                                                                                                                                                                                                                                                                                                                                                                                                                                                                                                                                                                                                                                                                                                                      | Aldise M Nastri; Gatot Soegiarto; Jezzy R Dewantari; Kazufumi Shimizu; Kohar Hari Santoso; Krisnoadi Rahardjo; Laksmi Wulandari; Maria I Lusida; Resti Yudhawati; Rima R Prasetya; Soetjipto; Yasuko Mori                                                                                                                                                                                                                                                                                                                                                                                                                                                                                                                                                                                                                                                                                                                                                                                   |
| EPI_ISL_2398631, EPI_ISL_2398802, EPI_ISL_2398951, EPI_ISL_2398994, EPI_ISL_2399066, EPI_ISL_2399251, EPI_ISL_2399285, EPI_ISL_2480245, EPI_ISL_2481076, EPI_ISL_2481340, EPI_ISL_2481776, EPI_ISL_3016940, EPI_ISL_4331663, EPI_ISL_4372674, EPI_ISL_4373215, EPI_ISL_4373256, EPI_ISL_4373892, EPI_ISL_4373957, EPI_ISL_4374029, EPI_ISL_4374278, EPI_ISL_4374663, EPI_ISL_4374990, EPI_ISL_4375324, EPI_ISL_4375497, EPI_ISL_4375508, EPI_ISL_4375983, EPI_ISL_4376047, EPI_ISL_4376435, EPI_ISL_4376527, EPI_ISL_4376754, EPI_ISL_4376931, EPI_ISL_4377257, EPI_ISL_4377315, EPI_ISL_4377827, EPI_ISL_4378055, EPI_ISL_4378401, EPI_ISL_4378699, EPI_ISL_4379112, EPI_ISL_4379367, EPI_ISL_4379373, EPI_ISL_4379824, EPI_ISL_4379865, EPI_ISL_4380216, EPI_ISL_4380224, EPI_ISL_4380226, EPI_ISL_4380813, EPI_ISL_4380992, EPI_ISL_4381139, EPI_ISL_4381326, EPI_ISL_4381492, EPI_ISL_4381923, EPI_ISL_4382153, EPI_ISL_4382466, EPI_ISL_4382469 | Centers for Disease Control and Prevention Division of Viral Diseases, Pathogen Discovery                      | Adrian Paskie; Amanda Douglas; Amanda Suchanek; Andrea Throop; Ayla Burns; Benjamin Rambo-Martin; Bobbi Croy; Brian Krueger; Brian Norvell; Christopher Gulvick; Christos Petropoulos; Clinton Paden; Clinton R. Paden; Craig Lukasik; Dakota Howard; Darlene Wagner; Debbie Boles; Dhvani Batra; Duncan MacCannell; Eyad Almasri; Goran Stevovic; Howard Engler; Hrushikesh Deshmukh; Jake Humphrey; Jana Schroth; Jason Caravas; Joe Voshell; John Pruitt; Jonathan Meltzer; Jonathan Williams; Kara Moser; Kimberly Wagner; Kristine Lacek; Lax Iyer; Lisa Pfefferle; Lyndon Tilson; Manoj Jain; Marcia Eisenberg; Mary Ann Cristobal; Mary Cristobal; Mary Williamson; Matthew Robinson; Matthew Schmeer; Michael Levandoski; Mike Sapeta; Mindy Nyre; Minoo Agarwal; Mohan Koli; Nuthawin Charoensri; Oren Cohen; Peter Cook; Peter W. Cook; Prashant Gupta; Qian Zeng; Rama Ghatti; Scott Parker; Scott Ryan; Scott Sammons; Shatavia Morrison; Stanley Letovsky; Steven Ragan; Suresh Babu Selvaraju; Suresh Selvaraju; Susan Countryman; Susan Hicks; Suzanne Dale; Thomas Urban; Tim Kuphal; Tricia Zwiefelhofer; Tymeckia Kendall; Victoria Caban Figueroa; Vincent Drouillon; Yvette Unourumhi |                                                                                                                                                                                                                                                                                                                                                                                                                                                                                                                                                                                                                                                                                                                                                                                                                                                                                                                                                                                             |
| EPI_ISL_2811860                                                                                                                                                                                                                                                                                                                                                                                                                                                                                                                                                                                                                                                                                                                                                                                                                                                                                                                                      | Laboratory Medicine, University of Washington                                                                  | Laboratory Medicine, University of Washington                                                                                                                                                                                                                                                                                                                                                                                                                                                                                                                                                                                                                                                                                                                                                                                                                                                                                                                                                                                                                                                                                                                                                             | Castor; J.L.                                                                                                                                                                                                                                                                                                                                                                                                                                                                                                                                                                                                                                                                                                                                                                                                                                                                                                                                                                                |
| EPI_ISL_2501859                                                                                                                                                                                                                                                                                                                                                                                                                                                                                                                                                                                                                                                                                                                                                                                                                                                                                                                                      | Laboratory of Clinical Microbiology, Virology and Bioemergencies, ASST Fatebenefratelli Sacco - Sacco Hospital | Laboratory of Clinical Microbiology, Virology and Bioemergencies, ASST Fatebenefratelli Sacco - Sacco Hospital                                                                                                                                                                                                                                                                                                                                                                                                                                                                                                                                                                                                                                                                                                                                                                                                                                                                                                                                                                                                                                                                                            | Alberto Rizzo; Alessandro Mancon; Fiorenza Bracchitta; Maria Rita Gismondo; Valeria Micheli                                                                                                                                                                                                                                                                                                                                                                                                                                                                                                                                                                                                                                                                                                                                                                                                                                                                                                 |
| EPI_ISL_3025539                                                                                                                                                                                                                                                                                                                                                                                                                                                                                                                                                                                                                                                                                                                                                                                                                                                                                                                                      | Laboratory, Gravity Diagnostics                                                                                | Laboratory, Gravity Diagnostics                                                                                                                                                                                                                                                                                                                                                                                                                                                                                                                                                                                                                                                                                                                                                                                                                                                                                                                                                                                                                                                                                                                                                                           | Diagnostics, G.                                                                                                                                                                                                                                                                                                                                                                                                                                                                                                                                                                                                                                                                                                                                                                                                                                                                                                                                                                             |
| EPI_ISL_2471027                                                                                                                                                                                                                                                                                                                                                                                                                                                                                                                                                                                                                                                                                                                                                                                                                                                                                                                                      | Labormedizin Darmstadt                                                                                         | Robert Koch Institute                                                                                                                                                                                                                                                                                                                                                                                                                                                                                                                                                                                                                                                                                                                                                                                                                                                                                                                                                                                                                                                                                                                                                                                     |                                                                                                                                                                                                                                                                                                                                                                                                                                                                                                                                                                                                                                                                                                                                                                                                                                                                                                                                                                                             |
| EPI_ISL_2484227, EPI_ISL_2484372, EPI_ISL_2484502                                                                                                                                                                                                                                                                                                                                                                                                                                                                                                                                                                                                                                                                                                                                                                                                                                                                                                    | Labormedizinisches Zentrum Dr Risch                                                                            | Clinical Bacteriology                                                                                                                                                                                                                                                                                                                                                                                                                                                                                                                                                                                                                                                                                                                                                                                                                                                                                                                                                                                                                                                                                                                                                                                     | Adrian Egli; Alfredo Mari; Fanny Wegner; Hans Hirsch; Helena MB Seth-Smith; Julia Bielicki; Karoline Leuzinger; Lorenz Risch; Manuel Battegay; Martin Risch; Nadia Wohlwend; Tim Roloff                                                                                                                                                                                                                                                                                                                                                                                                                                                                                                                                                                                                                                                                                                                                                                                                     |
| EPI_ISL_4201711                                                                                                                                                                                                                                                                                                                                                                                                                                                                                                                                                                                                                                                                                                                                                                                                                                                                                                                                      | Lagos State Biobank, Lagos, Nigeria                                                                            | 54gene Molecular Genetics Laboratory, Nigeria                                                                                                                                                                                                                                                                                                                                                                                                                                                                                                                                                                                                                                                                                                                                                                                                                                                                                                                                                                                                                                                                                                                                                             | Bankole Johnson; Chiamaka Nwuba; Chinyere Anyika; Dr Abasi Ene Obong; Dr Olajumoke Popoola; Dr Olukunle Oluwaseunmowo; Dr. Olufemi Obafemi; Emame Edu; Ifunanya Ego; Lagos State Government; Mary Lalemi; Moyniloluwa Odugbemi; Nigerian Centre for Disease Control; Nonso Nduka; Ofonime Ebono; Oluwatimilehin Adewumi; Subomi Olorunsami; Tomiwa Adepetan                                                                                                                                                                                                                                                                                                                                                                                                                                                                                                                                                                                                                                 |
| EPI_ISL_2860012, EPI_ISL_2860034, EPI_ISL_2860054, EPI_ISL_2860085, EPI_ISL_2860115, EPI_ISL_2860116, EPI_ISL_2860152, EPI_ISL_2860171, EPI_ISL_4713129, EPI_ISL_4713172, EPI_ISL_4713237, EPI_ISL_4713280, EPI_ISL_4713289, EPI_ISL_4713441, EPI_ISL_4713490, EPI_ISL_4713568, EPI_ISL_4741457, EPI_ISL_4741459, EPI_ISL_4741491, EPI_ISL_4741500, EPI_ISL_4741507, EPI_ISL_4741509, EPI_ISL_4741520, EPI_ISL_4741528, EPI_ISL_4741540, EPI_ISL_4741540, EPI_ISL_4741547, EPI_ISL_4741548, EPI_ISL_4741549, EPI_ISL_4741555, EPI_ISL_4741568, EPI_ISL_4741573, EPI_ISL_4741581, EPI_ISL_4741590, EPI_ISL_4742029, EPI_ISL_4742174, EPI_ISL_4742182, EPI_ISL_5538099, EPI_ISL_5562812, EPI_ISL_5568737, EPI_ISL_5569572, EPI_ISL_5569669, EPI_ISL_5570041, EPI_ISL_5570107                                                                                                                                                                           | Philippine Genome Center                                                                                       | Alethea R. de Guzman; Alyssa Joyce E. Telles; Anna Ong-Lim; Arianne A. Zamora; Benedict A. Maralit; Carlo M. Lapid; Celia Carlos; Cynthia P. Saloma; Devon Ray Pacial; Diomedes A. Carino; Diomedes A. Carifio; Edsel Maurice Salvana; Edsel Maurice Salvaña; El King D. Morado; Elicid Aaron R. Pangilinan; Eva Maria Cutiongco-de la Paz; Francis A. Tablizo; Henrietta Marie Rodriguez; Jaime C. Montoya; Jan Michael C. Yap; Jarvin E. Nipales; Jo-Hannah S. Llamas; John Michael Egan; John Q. Wong; Joshua Gregor A. Dizon; Joshua Jose Endozo; Juan Antonio R. Magalang; Karol Sophia Agape R. Padilla; Kenneth M. Kim; Kris P. Punayan; Kristina Patriz Dela Cruz; Kristina Patriz Dela Cruz; Lindsay Claire D.L. Carandang; Lindsay Clare D.L. Carandang; Marc Edsel C. Ayes; Maria Rosario Singh-Vergeire; Maria Sofia L. Yangzon; Marielle M Gamboa; Marielle M. Gamboa; Marissa Alejandria; Nina Francesca Bustamante; Niña Francesca Bustamante; Razel Nikka M. Hao; Renato Jacinto Q. Mantaring; Rianna Patricia S. Cruz; Sheila Mae M. Araiza; Yvonne Valerie Austria; Zipporah Mariebelle R. Enriquez; Zyrel V. Mollejon                                                                  |                                                                                                                                                                                                                                                                                                                                                                                                                                                                                                                                                                                                                                                                                                                                                                                                                                                                                                                                                                                             |
| EPI_ISL_4730425                                                                                                                                                                                                                                                                                                                                                                                                                                                                                                                                                                                                                                                                                                                                                                                                                                                                                                                                      | Lahad Datu Hospital                                                                                            | Institute for Medical Research, Infectious Disease Research Centre, National Institutes of Health, Ministry of Health Malaysia                                                                                                                                                                                                                                                                                                                                                                                                                                                                                                                                                                                                                                                                                                                                                                                                                                                                                                                                                                                                                                                                            | Ahmad FA; Ahmad Fazilah NA; Anasir MI; Azizan MA; Kamel K; Mohd Zawawi Z; Norhisham SN; Ramly N; Robert F; Suppiah J; Thayyan R                                                                                                                                                                                                                                                                                                                                                                                                                                                                                                                                                                                                                                                                                                                                                                                                                                                             |
| EPI_ISL_3506440, EPI_ISL_5524663                                                                                                                                                                                                                                                                                                                                                                                                                                                                                                                                                                                                                                                                                                                                                                                                                                                                                                                     | Lancet                                                                                                         | NHL/UCT                                                                                                                                                                                                                                                                                                                                                                                                                                                                                                                                                                                                                                                                                                                                                                                                                                                                                                                                                                                                                                                                                                                                                                                                   | Arash Iranzadeh; Bruna Galvao; Carolyn Williamson; Deelan Doolabh; Diana Hardie; Gert Marais; Innocent Mudau; Lynn Tyers; Marvin Hsiao; Rageama Joseph; Sisonke; Stephen Korsman                                                                                                                                                                                                                                                                                                                                                                                                                                                                                                                                                                                                                                                                                                                                                                                                            |
| EPI_ISL_3073902, EPI_ISL_3073905, EPI_ISL_3074042, EPI_ISL_3074043                                                                                                                                                                                                                                                                                                                                                                                                                                                                                                                                                                                                                                                                                                                                                                                                                                                                                   | Lancet Laboratory                                                                                              | National Institute for Communicable Diseases of the National Health Laboratory Service                                                                                                                                                                                                                                                                                                                                                                                                                                                                                                                                                                                                                                                                                                                                                                                                                                                                                                                                                                                                                                                                                                                    | Amoako DG; Bhiman JN; Everatt J; Ismail A; Mahlungu B; Mnguni A; Mohale T; Ntuli N; Scheepers C                                                                                                                                                                                                                                                                                                                                                                                                                                                                                                                                                                                                                                                                                                                                                                                                                                                                                             |
| EPI_ISL_3207576                                                                                                                                                                                                                                                                                                                                                                                                                                                                                                                                                                                                                                                                                                                                                                                                                                                                                                                                      | Lancet lab                                                                                                     | NHL/UCT                                                                                                                                                                                                                                                                                                                                                                                                                                                                                                                                                                                                                                                                                                                                                                                                                                                                                                                                                                                                                                                                                                                                                                                                   | Arash Iranzadeh; Bruna Galvao; Carolyn Williamson; Deelan Doolabh; Diana Hardie; Gert Marais; Innocent Mudau; Lynn Tyers; Marvin Hsiao; Rageama Joseph; Sisonke; Stephen Korsman                                                                                                                                                                                                                                                                                                                                                                                                                                                                                                                                                                                                                                                                                                                                                                                                            |
| EPI_ISL_2375918                                                                                                                                                                                                                                                                                                                                                                                                                                                                                                                                                                                                                                                                                                                                                                                                                                                                                                                                      | Langebaan Clinic wc LBC                                                                                        | NHL/UCT                                                                                                                                                                                                                                                                                                                                                                                                                                                                                                                                                                                                                                                                                                                                                                                                                                                                                                                                                                                                                                                                                                                                                                                                   | Arash Iranzadeh; Bruna Galvao; Carolyn Williamson; Deelan Doolabh; Diana Hardie; Innocent Mudau; Kruger Marais; Lynn Tyers; Marvin Hsiao; Stephen Korsman                                                                                                                                                                                                                                                                                                                                                                                                                                                                                                                                                                                                                                                                                                                                                                                                                                   |
| EPI_ISL_5587863                                                                                                                                                                                                                                                                                                                                                                                                                                                                                                                                                                                                                                                                                                                                                                                                                                                                                                                                      | Las Piñas General Hospital and Satellite Trauma Center                                                         | Philippine Genome Center                                                                                                                                                                                                                                                                                                                                                                                                                                                                                                                                                                                                                                                                                                                                                                                                                                                                                                                                                                                                                                                                                                                                                                                  | Alethea R. de Guzman; Alyssa Joyce E. Telles; Anna Ong-Lim; Arianne A. Zamora; Benedict A. Maralit; Carlo M. Lapid; Celia Carlos; Cynthia P. Saloma; Devon Ray Pacial; Diomedes A. Carifio; Edsel Maurice Salvana; El King D. Morado; Elicid Aaron R. Pangilinan; Eva Maria Cutiongco-de la Paz; Francis A. Tablizo; Henrietta Marie Rodriguez; Jaime C. Montoya; Jan Michael C. Yap; Jarvin E. Nipales; Jo-Hannah S. Llamas; John Michael Egan; John Q. Wong; Joshua Gregor A. Dizon; Joshua Jose Endozo; Juan Antonio R. Magalang; Karol Sophia Agape R. Padilla; Kris P. Punayan; Kristina Patriz Dela Cruz; Lindsay Clare D.L. Carandang; Ma. Exanill Planting; Marc Edsel C. Ayes; Maria Rosario Singh-Vergeire; Maria Sofia L. Yangzon; Marielle M. Gamboa; Marissa Alejandria; Niña Francesca Bustamante; Razel Nikka M. Hao; Renato Jacinto Q. Mantaring; Rianna Patricia S. Cruz; Shiela Mae M. Araiza; Yvonne Valerie Austria; Zipporah Mariebelle R. Enriquez; Zyrel V. Mollejon |
| EPI_ISL_2437530, EPI_ISL_2554885                                                                                                                                                                                                                                                                                                                                                                                                                                                                                                                                                                                                                                                                                                                                                                                                                                                                                                                     | Lighthouse Lab in Alderley Park                                                                                | Wellcome Sanger Institute for the COVID-19 Genomics UK (COG-UK) Consortium                                                                                                                                                                                                                                                                                                                                                                                                                                                                                                                                                                                                                                                                                                                                                                                                                                                                                                                                                                                                                                                                                                                                | Cordelia Langford; David K. Jackson; Dominic Kwiatkowski; Ewan Harrison; Ian Johnston; Jacquelyn Wynn; Jeffrey Barrett; John Sillitoe on behalf of the Wellcome Sanger Institute COVID-19 Surveillance Team; Mairead Hyland; Roberto Amato; Sonia Goncalves; The Lighthouse Lab in Alderley Park and Alex Alderton                                                                                                                                                                                                                                                                                                                                                                                                                                                                                                                                                                                                                                                                          |
| EPI_ISL_2608288, EPI_ISL_2608289, EPI_ISL_2641722, EPI_ISL_2704677                                                                                                                                                                                                                                                                                                                                                                                                                                                                                                                                                                                                                                                                                                                                                                                                                                                                                   | Lighthouse Lab in Cambridge                                                                                    | Wellcome Sanger Institute for the COVID-19 Genomics UK (COG-UK) Consortium                                                                                                                                                                                                                                                                                                                                                                                                                                                                                                                                                                                                                                                                                                                                                                                                                                                                                                                                                                                                                                                                                                                                | Cordelia Langford; David K. Jackson; Dominic Kwiatkowski; Ewan Harrison; Ian Johnston; Jeffrey Barrett; John Sillitoe on behalf of the Wellcome Sanger Institute COVID-19 Surveillance Team; Rob Howes; Roberto Amato; Sonia Goncalves; The Lighthouse Lab in Cambridge and Alex Alderton                                                                                                                                                                                                                                                                                                                                                                                                                                                                                                                                                                                                                                                                                                   |
| EPI_ISL_3203770                                                                                                                                                                                                                                                                                                                                                                                                                                                                                                                                                                                                                                                                                                                                                                                                                                                                                                                                      | Lighthouse Lab in Glasgow                                                                                      | Wellcome Sanger Institute for the COVID-19 Genomics UK (COG-UK) Consortium                                                                                                                                                                                                                                                                                                                                                                                                                                                                                                                                                                                                                                                                                                                                                                                                                                                                                                                                                                                                                                                                                                                                | Anna Dominiczak and Alex Alderton; Carol Clugston; Cordelia Langford; David Gray; David K. Jackson; Dominic Kwiatkowski; Ewan Harrison; Harper VanSteenhouse; Ian Johnston; Jeffrey Barrett; John Sillitoe on behalf of the Wellcome Sanger Institute COVID-19 Surveillance Team; Roberto Amato; Sonia Goncalves; Yumi Kasai                                                                                                                                                                                                                                                                                                                                                                                                                                                                                                                                                                                                                                                                |
| EPI_ISL_2366297, EPI_ISL_2392826, EPI_ISL_2438544, EPI_ISL_2456639, EPI_ISL_2487022, EPI_ISL_2511447, EPI_ISL_2511597, EPI_ISL_2511807, EPI_ISL_2538830, EPI_ISL_2568858, EPI_ISL_2568983, EPI_ISL_2570464, EPI_ISL_2606531, EPI_ISL_2606787, EPI_ISL_2608284, EPI_ISL_2703634, EPI_ISL_2717907, EPI_ISL_2765728, EPI_ISL_2767868, EPI_ISL_2780700, EPI_ISL_2781539, EPI_ISL_3335428, EPI_ISL_3365200, EPI_ISL_3440003                                                                                                                                                                                                                                                                                                                                                                                                                                                                                                                               | Lighthouse Lab in Milton Keynes                                                                                | Wellcome Sanger Institute for the COVID-19 Genomics UK (COG-UK) Consortium                                                                                                                                                                                                                                                                                                                                                                                                                                                                                                                                                                                                                                                                                                                                                                                                                                                                                                                                                                                                                                                                                                                                | Cordelia Langford; David K. Jackson; Dominic Kwiatkowski; Ewan Harrison; Ian Johnston; Jeffrey Barrett; John Sillitoe on behalf of the Wellcome Sanger Institute COVID-19 Surveillance Team; Roberto Amato; Sonia Goncalves; The Lighthouse Lab in Milton Keynes and Alex Alderton                                                                                                                                                                                                                                                                                                                                                                                                                                                                                                                                                                                                                                                                                                          |
| EPI_ISL_5195384                                                                                                                                                                                                                                                                                                                                                                                                                                                                                                                                                                                                                                                                                                                                                                                                                                                                                                                                      | Lotus River CDC wc LRC                                                                                         | NHL/UCT                                                                                                                                                                                                                                                                                                                                                                                                                                                                                                                                                                                                                                                                                                                                                                                                                                                                                                                                                                                                                                                                                                                                                                                                   | Arash Iranzadeh; Bruna Galvao; Carolyn Williamson; Deelan Doolabh; Diana Hardie; Gert Marais; Innocent Mudau; Lynn Tyers; Marvin Hsiao; Rageama Joseph; Stephen Korsman                                                                                                                                                                                                                                                                                                                                                                                                                                                                                                                                                                                                                                                                                                                                                                                                                     |
| EPI_ISL_5562768                                                                                                                                                                                                                                                                                                                                                                                                                                                                                                                                                                                                                                                                                                                                                                                                                                                                                                                                      | Lucena United Doctors Hospital And Medical Center                                                              | Philippine Genome Center                                                                                                                                                                                                                                                                                                                                                                                                                                                                                                                                                                                                                                                                                                                                                                                                                                                                                                                                                                                                                                                                                                                                                                                  | Alethea R. de Guzman; Alyssa Joyce E. Telles; Anna Ong-Lim; Arianne A. Zamora; Benedict A. Maralit; Carlo M. Lapid; Celia Carlos; Cynthia P. Saloma; Devon Ray Pacial; Diomedes A. Carifio; Edsel Maurice Salvana; El King D. Morado; Elicid Aaron R. Pangilinan; Eva Maria Cutiongco-de la Paz; Francis A. Tablizo; Henrietta Marie Rodriguez; Jaime C. Montoya; Jan Michael C. Yap; Jarvin E. Nipales; Jo-Hannah S. Llamas; John Michael Egan; John Q. Wong; Joshua Gregor A. Dizon; Joshua Jose Endozo; Juan Antonio R. Magalang; Karol Sophia Agape R. Padilla; Kris P. Punayan; Kristina Patriz Dela Cruz; Lindsay Clare D.L. Carandang; Ma. Exanill Planting; Marc Edsel C. Ayes; Maria Rosario Singh-Vergeire; Maria Sofia L. Yangzon; Marielle M. Gamboa; Marissa Alejandria; Niña Francesca Bustamante; Razel Nikka M. Hao; Renato Jacinto Q. Mantaring; Rianna Patricia S. Cruz; Shiela Mae M. Araiza; Yvonne Valerie Austria; Zipporah Mariebelle R. Enriquez; Zyrel V. Mollejon |
| EPI_ISL_2859315, EPI_ISL_4741537, EPI_ISL_5540523, EPI_ISL_5543265, EPI_ISL_5547388, EPI_ISL_5568762, EPI_ISL_5569469, EPI_ISL_5569490                                                                                                                                                                                                                                                                                                                                                                                                                                                                                                                                                                                                                                                                                                                                                                                                               | see above                                                                                                      | Lung Center of the Philippines (LCP)                                                                                                                                                                                                                                                                                                                                                                                                                                                                                                                                                                                                                                                                                                                                                                                                                                                                                                                                                                                                                                                                                                                                                                      | Philippine Genome Center                                                                                                                                                                                                                                                                                                                                                                                                                                                                                                                                                                                                                                                                                                                                                                                                                                                                                                                                                                    |
| EPI_ISL_2376587                                                                                                                                                                                                                                                                                                                                                                                                                                                                                                                                                                                                                                                                                                                                                                                                                                                                                                                                      | M Health Fairview                                                                                              | Minnesota Department of Health, Public Health Laboratory                                                                                                                                                                                                                                                                                                                                                                                                                                                                                                                                                                                                                                                                                                                                                                                                                                                                                                                                                                                                                                                                                                                                                  | Alexandra Lorentz; Jacob Garfin; Matt Plumb; and Xiong Wang                                                                                                                                                                                                                                                                                                                                                                                                                                                                                                                                                                                                                                                                                                                                                                                                                                                                                                                                 |
| EPI_ISL_3354254                                                                                                                                                                                                                                                                                                                                                                                                                                                                                                                                                                                                                                                                                                                                                                                                                                                                                                                                      | MA State Public Health Laboratory                                                                              | Centers for Disease Control and Prevention Division of Viral Diseases, Pathogen Discovery                                                                                                                                                                                                                                                                                                                                                                                                                                                                                                                                                                                                                                                                                                                                                                                                                                                                                                                                                                                                                                                                                                                 | Alex Burgin; Ben Rambo-Martin; Clinton Paden; Dakota Howard; Dave Wentworth; Dhvani Batra; Jasmine Padilla; Justin Lee; Krista Queen; Kristen Knipe; Kristine Lacek; Mark Burrows; Matthew Schmeer; Meghan Bentz; Mili Sheth; Peter Cook; Sam Shepard; Sarah Nobles; Suxiang Tong; Vivien Dugan; Yvette Unourumhi                                                                                                                                                                                                                                                                                                                                                                                                                                                                                                                                                                                                                                                                           |
| EPI_ISL_2827165, EPI_ISL_3073925                                                                                                                                                                                                                                                                                                                                                                                                                                                                                                                                                                                                                                                                                                                                                                                                                                                                                                                     | MANKWENG LABORATORY                                                                                            | National Institute for Communicable Diseases of the National Health Laboratory Service                                                                                                                                                                                                                                                                                                                                                                                                                                                                                                                                                                                                                                                                                                                                                                                                                                                                                                                                                                                                                                                                                                                    | Amoako DG; Bhiman JN; Everatt J; Ismail A; Mahlungu B; Mnguni A; Mohale T; Ntuli N; Scheepers C                                                                                                                                                                                                                                                                                                                                                                                                                                                                                                                                                                                                                                                                                                                                                                                                                                                                                             |
| EPI_ISL_4459430                                                                                                                                                                                                                                                                                                                                                                                                                                                                                                                                                                                                                                                                                                                                                                                                                                                                                                                                      | MATAAS NA KAHOY RURAL HEALTH UNIT                                                                              | Research Institute for Tropical Medicine/Tohoku University                                                                                                                                                                                                                                                                                                                                                                                                                                                                                                                                                                                                                                                                                                                                                                                                                                                                                                                                                                                                                                                                                                                                                | Allen Anthony Laraño; Ardiane Ysabelle Dolor; Catalino Demetria; Clyde Dapag; Emmanuel Kagning Tsinda; Francisco Gerardo Polotan; Hitoshi Oshitani; Inez Andrea Medado; Jefferson Earl Halog; Lei Lanna Dancel; Leilanie Nacion; Ma. Angelica Tujan; Machiko Okamoto; Maria Carmen Corpuz; Mariko Siat-Obata; Mayuko Saito                                                                                                                                                                                                                                                                                                                                                                                                                                                                                                                                                                                                                                                                  |
| EPI_ISL_3356778, EPI_ISL_3356813, EPI_ISL_4494381, EPI_ISL_4494413, EPI_ISL_4494419, EPI_ISL_4494497                                                                                                                                                                                                                                                                                                                                                                                                                                                                                                                                                                                                                                                                                                                                                                                                                                                 | MB-Cadham Provincial laboratory                                                                                | Manitoba Cadham Provincial Laboratory                                                                                                                                                                                                                                                                                                                                                                                                                                                                                                                                                                                                                                                                                                                                                                                                                                                                                                                                                                                                                                                                                                                                                                     | Adam Hedley; Anna Majer; Anneliese Landgraff; CanCOGen's metadata curation team; Darian Hole; David Alexander; Elsie Grudeski; Gary Van Domselaar; Grace Seo; Jana Holowick; Jared Bullard; Jennifer Tanner; Kerry Dust; Kirsten Biggar; Lori Johnson; Madison Chapel; Morag Graham; Nat; Natalie Knox; Nathalie Bastien; Paul Van Caesele; Philip Mabon; Public Health Agency of Canada CanCOGen team; Rhiannon Huzarewich; Russell Mandes; Shari Tyson; Timothy Booth; Yan Li                                                                                                                                                                                                                                                                                                                                                                                                                                                                                                             |
| EPI_ISL_2495603, EPI_ISL_2495604, EPI_ISL_3356844, EPI_ISL_3356863, EPI_ISL_4494289, EPI_ISL_4494290, EPI_ISL_4494291, EPI_ISL_4494296                                                                                                                                                                                                                                                                                                                                                                                                                                                                                                                                                                                                                                                                                                                                                                                                               | see above                                                                                                      | National Microbiology Laboratory (NML)                                                                                                                                                                                                                                                                                                                                                                                                                                                                                                                                                                                                                                                                                                                                                                                                                                                                                                                                                                                                                                                                                                                                                                    | Anna Majer; Anneliese Landgraff; CanCOGen's metadata curation team; Darian Hole; David Alexander; Elsie Grudeski; Gary Van Domselaar; Grace Seo; Jared Bullard; Jennifer Tanner; Kerry Dust; Kirsten Biggar; Madison Chapel; Morag Graham; Nat; Natalie Knox; Nathalie Bastien; Paul Van Caesele; Philip Mabon; Public Health Agency of Canada CanCOGen team; Rhiannon Huzarewich; Russell Mandes; Shari Tyson; Timothy Booth; Yan Li                                                                                                                                                                                                                                                                                                                                                                                                                                                                                                                                                       |
| EPI_ISL_2544783                                                                                                                                                                                                                                                                                                                                                                                                                                                                                                                                                                                                                                                                                                                                                                                                                                                                                                                                      | MD PHL                                                                                                         | MD PHL                                                                                                                                                                                                                                                                                                                                                                                                                                                                                                                                                                                                                                                                                                                                                                                                                                                                                                                                                                                                                                                                                                                                                                                                    | Maryland Department of Health Laboratories Administration                                                                                                                                                                                                                                                                                                                                                                                                                                                                                                                                                                                                                                                                                                                                                                                                                                                                                                                                   |
| EPI_ISL_2472394                                                                                                                                                                                                                                                                                                                                                                                                                                                                                                                                                                                                                                                                                                                                                                                                                                                                                                                                      | MDI Limbach Berlin GmbH; MVZ Labor Berlin                                                                      | Robert Koch Institute                                                                                                                                                                                                                                                                                                                                                                                                                                                                                                                                                                                                                                                                                                                                                                                                                                                                                                                                                                                                                                                                                                                                                                                     |                                                                                                                                                                                                                                                                                                                                                                                                                                                                                                                                                                                                                                                                                                                                                                                                                                                                                                                                                                                             |

|                                                                                                                                                                                                                                                                                                                                                                                                       |                                                                                                 |                                                                                                                                |                                                                                           |                                                                                                                                                                                                                                                                                                                                                                                                                                                                                                                                                                                                                                                                                                                                                                                                                                                                                                                                                                                        |                                                                                                                                            |
|-------------------------------------------------------------------------------------------------------------------------------------------------------------------------------------------------------------------------------------------------------------------------------------------------------------------------------------------------------------------------------------------------------|-------------------------------------------------------------------------------------------------|--------------------------------------------------------------------------------------------------------------------------------|-------------------------------------------------------------------------------------------|----------------------------------------------------------------------------------------------------------------------------------------------------------------------------------------------------------------------------------------------------------------------------------------------------------------------------------------------------------------------------------------------------------------------------------------------------------------------------------------------------------------------------------------------------------------------------------------------------------------------------------------------------------------------------------------------------------------------------------------------------------------------------------------------------------------------------------------------------------------------------------------------------------------------------------------------------------------------------------------|--------------------------------------------------------------------------------------------------------------------------------------------|
| EPI_ISL_2453353, EPI_ISL_2453345, EPI_ISL_2453446, EPI_ISL_2453607, EPI_ISL_2453698, EPI_ISL_2453909, EPI_ISL_2597076, EPI_ISL_2597084, EPI_ISL_2597194, EPI_ISL_2597210, EPI_ISL_2659730, EPI_ISL_2757073, EPI_ISL_2757079, EPI_ISL_2843361, EPI_ISL_2843883, EPI_ISL_3054757, EPI_ISL_3054758, EPI_ISL_3432992, EPI_ISL_3432993, EPI_ISL_3432994, EPI_ISL_3432995                                   | see above                                                                                       | MEPHI, Aix Marseille University                                                                                                | MEPHI, Aix Marseille University                                                           |                                                                                                                                                                                                                                                                                                                                                                                                                                                                                                                                                                                                                                                                                                                                                                                                                                                                                                                                                                                        | Anthony LEVASSEUR                                                                                                                          |
| EPI_ISL_4459427                                                                                                                                                                                                                                                                                                                                                                                       | METRO LEMERY MEDICAL CENTER                                                                     | Research Institute for Tropical Medicine/Tohoku University                                                                     |                                                                                           | Allen Anthony Laraño; Ardiانة Ysabelle Dolor; Catalino Demetria; Clyde Dapa; Emmanuel Kagning Tsiinda; Francisco Gerardo Polotan; Hitoshi Oshitani; Inez Andrea Medado; Jefferson Earl Halog; Lei Lanna Dancel; Leilanie Nacion; Ma, Angelica Tujan; Machiko Okamoto; Maria Carmen Corpuz; Mariko                                                                                                                                                                                                                                                                                                                                                                                                                                                                                                                                                                                                                                                                                      |                                                                                                                                            |
| EPI_ISL_2895749, EPI_ISL_2895752, EPI_ISL_2895755, EPI_ISL_2895760                                                                                                                                                                                                                                                                                                                                    | MIDDELBURG LABORATORY                                                                           | National Institute for Communicable Diseases of the National Health Laboratory Service                                         |                                                                                           |                                                                                                                                                                                                                                                                                                                                                                                                                                                                                                                                                                                                                                                                                                                                                                                                                                                                                                                                                                                        | Amoako DG; Bhiman JN; Everatt J; Ismail A; Mahlangu B; Mnguni A; Mohale T; Ntuli N; Scheepers C                                            |
| EPI_ISL_2482608, EPI_ISL_2567437, EPI_ISL_2567460, EPI_ISL_2676748, EPI_ISL_2893870                                                                                                                                                                                                                                                                                                                   | MIRIALIS CLUSES BECHET                                                                          | CNR Virus des Infections Respiratoires - France SUD                                                                            |                                                                                           |                                                                                                                                                                                                                                                                                                                                                                                                                                                                                                                                                                                                                                                                                                                                                                                                                                                                                                                                                                                        | Antonin Bal; Bruno Lina; Bruno Simon; Gregory Destras; Gwendolyne Burfin; Hadrien Regue; Laurence Josset; Martine Valette; Quentin Semanas |
| EPI_ISL_2421103                                                                                                                                                                                                                                                                                                                                                                                       | MONTEFIORE MEDICAL CENTER LABORATORIES                                                          | Wadsworth Center, New York State Department of Health                                                                          |                                                                                           | Alexis Russell; Catharine Prussing; Daryl M. Lamson; Erasmus Schneider; Erica Lasek-Nesselquist; John Kelly; Jonathan Piltnick; Kirsten St. George; Matthew Shudt; Melissa A Leisner; Navjot Singh                                                                                                                                                                                                                                                                                                                                                                                                                                                                                                                                                                                                                                                                                                                                                                                     |                                                                                                                                            |
| EPI_ISL_3149433, EPI_ISL_3149435                                                                                                                                                                                                                                                                                                                                                                      | MRC/UVRI & LSHTM Uganda Research Unit, Uganda Virus Research Institute                          | MRC/UVRI & LSHTM Uganda Research Unit, Uganda Virus Research Institute                                                         |                                                                                           |                                                                                                                                                                                                                                                                                                                                                                                                                                                                                                                                                                                                                                                                                                                                                                                                                                                                                                                                                                                        | ; Dan Lule Bugembe; John Kayiwa; Matthew Cotten; My V.T Phan; Pontiano Kaleebu                                                             |
| EPI_ISL_2689875, EPI_ISL_2689877, EPI_ISL_2689878, EPI_ISL_2689879, EPI_ISL_2689880, EPI_ISL_2689881, EPI_ISL_2689882, EPI_ISL_2689884, EPI_ISL_2689886, EPI_ISL_2709553                                                                                                                                                                                                                              | see above                                                                                       | MS Public Health Laboratory                                                                                                    | Centers for Disease Control and Prevention Division of Viral Diseases, Pathogen Discovery | Alison Laufer Halpin; Ben L. Rambo-Martin; Clinton R. Paden; Dakota Howard; Darlene Wagner; Dave Wentworth; Dhwani Batra; Jasmine Padilla; Justin Lee; Katie Dillon; Krista Queen; Kristen Knipe; Kristine Lacek; Mark Burroughs; Matthew Schmeer; Mill Sheth; Peter Cook; Sam Shepard; Sarah Nobles; Shoshona Le; Suxiang Tong; Vivien Dugan; Yvette Unoarumhi                                                                                                                                                                                                                                                                                                                                                                                                                                                                                                                                                                                                                        |                                                                                                                                            |
| EPI_ISL_6492804                                                                                                                                                                                                                                                                                                                                                                                       | MSHS Clinical Microbiology Laboratories                                                         | MSHS Pathogen Surveillance Program Laboratories                                                                                |                                                                                           | Adolfo Garcia-Sastre; Adriana van de Guchte; Ajay Obia; Alberto Paniz-Mondolfi; Ana S. Gonzalez-Reiche; Angela Amoako; Ashley Salimbangon; Betsaida Salom Melo; Bremy Albuquerque; Brianne Ciferri; Charles Gleason; Daniel Floda; Deena R. Altman; Denise Jurczynszak; Emilia Mia Sordillo; Gintaras Deikus; Giulio Kleiner; Gopi Patel; Hala Alshammy; Harm van Bakel; Irina Oussenko; Jayeeta Datta; Juan Soto; Julia Matthews; Katherine Beach; Kathryn Twyman; Kayla Russo; Komal Srivastava; Levy Sominsky; Mahmoud Awawda; Marta Luksza; Matthew M. Hernandez; Melissa Gitman; Michael D. Nowak; Mitchell J. Sullivan; Nancy Francoeur; Robert Sebra; Sarah Schaefer; Sheldie Fabre; Shweta Hara Sridhar; Viviana Simon; Ying-Chih Wang; Zenab Khan                                                                                                                                                                                                                             |                                                                                                                                            |
| EPI_ISL_2390144                                                                                                                                                                                                                                                                                                                                                                                       | MVZ Labor Dr. Fenner und Kollegen (Standort Hamburg)                                            | Robert Koch Institute                                                                                                          |                                                                                           |                                                                                                                                                                                                                                                                                                                                                                                                                                                                                                                                                                                                                                                                                                                                                                                                                                                                                                                                                                                        |                                                                                                                                            |
| EPI_ISL_2471910, EPI_ISL_2472470, EPI_ISL_2472488, EPI_ISL_2472491, EPI_ISL_2472494, EPI_ISL_2472499                                                                                                                                                                                                                                                                                                  | MVZ Labor Dr. Limbach & Kollegen GbR                                                            | Robert Koch Institute                                                                                                          |                                                                                           |                                                                                                                                                                                                                                                                                                                                                                                                                                                                                                                                                                                                                                                                                                                                                                                                                                                                                                                                                                                        |                                                                                                                                            |
| EPI_ISL_2471126, EPI_ISL_2636778                                                                                                                                                                                                                                                                                                                                                                      | MVZ Labor Krone GbR                                                                             | Robert Koch Institute                                                                                                          |                                                                                           |                                                                                                                                                                                                                                                                                                                                                                                                                                                                                                                                                                                                                                                                                                                                                                                                                                                                                                                                                                                        |                                                                                                                                            |
| EPI_ISL_2471529                                                                                                                                                                                                                                                                                                                                                                                       | MVZ Medizinisches Labor Hannover GmbH                                                           | Robert Koch Institute                                                                                                          |                                                                                           |                                                                                                                                                                                                                                                                                                                                                                                                                                                                                                                                                                                                                                                                                                                                                                                                                                                                                                                                                                                        |                                                                                                                                            |
| EPI_ISL_2386188, EPI_ISL_2635143, EPI_ISL_2635807                                                                                                                                                                                                                                                                                                                                                     | MVZ für Laboratoriumsmedizin und Mikrobiologie Koblenz-Mittelrhein (Labor Koblenz)              | Robert Koch Institute                                                                                                          |                                                                                           |                                                                                                                                                                                                                                                                                                                                                                                                                                                                                                                                                                                                                                                                                                                                                                                                                                                                                                                                                                                        |                                                                                                                                            |
| EPI_ISL_4817051                                                                                                                                                                                                                                                                                                                                                                                       | Macassar CDC wc MCP                                                                             | NHLS/UCT                                                                                                                       |                                                                                           | Arash Iranzadeh; Bruna Galvao; Carolyn Williamson; Deelan Doolabh; Diana Hardie; Gert Marais; Innocent Mudau; Lynn Tyers; Marvin Hsiao; Rageema Joseph; Sisonke; Stephen Korsman                                                                                                                                                                                                                                                                                                                                                                                                                                                                                                                                                                                                                                                                                                                                                                                                       |                                                                                                                                            |
| EPI_ISL_2647296, EPI_ISL_2647311, EPI_ISL_2647330, EPI_ISL_2647389, EPI_ISL_2647449, EPI_ISL_3604114, EPI_ISL_4196457, EPI_ISL_4259753, EPI_ISL_4347777, EPI_ISL_4347943, EPI_ISL_4347953, EPI_ISL_4348089, EPI_ISL_4348144, EPI_ISL_4348205, EPI_ISL_4348234                                                                                                                                         | see above                                                                                       | Mako Medical                                                                                                                   | Centers for Disease Control and Prevention Division of Viral Diseases, Pathogen Discovery | Adrian Paskey; Benjamin Rambo-Martin; Christopher Gulvick; Clinton Paden; Clinton R. Paden; Dakota Howard; Darlene Wagner; Dhwani Batra; Duncan MacCannell; Erisa Sula; Jason Caravas; Kara Moser; Kara Moser; Kristine Lacek; Lauren Moon; Matthew Schmeer; Matthew Tugwell; Peter Cook; Peter W. Cook; Scott Sammons; Shatavia Morrison; Tymecia Kendall; Victoria Caban Figueroa; Yvette Unoarumhi                                                                                                                                                                                                                                                                                                                                                                                                                                                                                                                                                                                  |                                                                                                                                            |
| EPI_ISL_5524610                                                                                                                                                                                                                                                                                                                                                                                       | Mamre CDC wc MRC                                                                                | NHLS/UCT                                                                                                                       |                                                                                           | Arash Iranzadeh; Bruna Galvao; Carolyn Williamson; Deelan Doolabh; Diana Hardie; Gert Marais; Innocent Mudau; Lynn Tyers; Marvin Hsiao; Rageema Joseph; Stephen Korsman                                                                                                                                                                                                                                                                                                                                                                                                                                                                                                                                                                                                                                                                                                                                                                                                                |                                                                                                                                            |
| EPI_ISL_4715305, EPI_ISL_5537969, EPI_ISL_5538216, EPI_ISL_5539266, EPI_ISL_5542592                                                                                                                                                                                                                                                                                                                   | Manila Doctors Hospital                                                                         | Philippine Genome Center                                                                                                       |                                                                                           | Alethea R. de Guzman; Anna Ong-Lim; Arienne A. Zamora; Benedict A. Maralit; Carlo M. Lapid; Celia Carlos; Cynthia P. Saloma; Devon Ray Pacial; Diomedes A. Cariño; Edsel Maurice Salvana; El King D. Morado; Elcid Aaron R. Pangilinan; Eva Maria Cutiongo-de la Paz; Francis A. Tablizo; Henrietta Marie Rodriguez; Jaime C. Montoya; Jan Michael C. Yap; Jarvin E. Nipales; Jo-Hannah S. Llames; John Q. Wong; Joshua Gregor A. Dizon; Juan Antonio R. Magalang; Karol Sophia Agape R. Padilla; Kenneth M. Kim; Kris P. Punayan; Kristina Patriz Dela Cruz; Lindsay Clare D.L. Carandang; Ma. Exanii Plantig; Marc Edsel C. Ayes; Maria Rosario Singh-Vergeire; Maria Sofia L. Yangzon; Marielle M. Gamboa; Marissa Alejandria; Niña Francesca Bustamante; Razel Nikka M. Hao; Renato Jacinto Q. Mantaring; Rianna Patricia S. Cruz; Shiela Mae M. Araiza; Yvonne Valerie Austria; Zipporah Mariebelle R. Enriquez; Zyrel V. Mollejon                                                |                                                                                                                                            |
| EPI_ISL_4714657, EPI_ISL_4714729, EPI_ISL_4714833, EPI_ISL_4741517, EPI_ISL_5562648, EPI_ISL_5562982, EPI_ISL_5568699, EPI_ISL_5568776, EPI_ISL_5569476, EPI_ISL_5569761, EPI_ISL_5570561                                                                                                                                                                                                             | see above                                                                                       | Manuel J. Santos Hospital                                                                                                      | Philippine Genome Center                                                                  | Alethea R. de Guzman; Alyssa Joyce E. Telles; Anna Ong-Lim; Arienne A. Zamora; Benedict A. Maralit; Carlo M. Lapid; Celia Carlos; Cynthia P. Saloma; Devon Ray Pacial; Diomedes A. Cariño; Edsel Maurice Salvana; El King D. Morado; Elcid Aaron R. Pangilinan; Eva Maria Cutiongo-de la Paz; Francis A. Tablizo; Henrietta Marie Rodriguez; Jaime C. Montoya; Jan Michael C. Yap; Jarvin E. Nipales; Jo-Hannah S. Llames; John Q. Wong; Joshua Gregor A. Dizon; Juan Antonio R. Magalang; Karol Sophia Agape R. Padilla; Kenneth M. Kim; Kris P. Punayan; Kristina Patriz Dela Cruz; Lindsay Clare D.L. Carandang; Ma. Exanii Plantig; Marc Edsel C. Ayes; Maria Rosario Singh-Vergeire; Maria Sofia L. Yangzon; Marielle M. Gamboa; Marissa Alejandria; Niña Francesca Bustamante; Razel Nikka M. Hao; Renato Jacinto Q. Mantaring; Rianna Patricia S. Cruz; Shiela Mae M. Araiza; Yvonne Valerie Austria; Zipporah Mariebelle R. Enriquez; Zyrel V. Mollejon                        |                                                                                                                                            |
| EPI_ISL_2373322, EPI_ISL_2373324, EPI_ISL_2373338, EPI_ISL_2441362, EPI_ISL_2441363, EPI_ISL_2774637, EPI_ISL_2774654, EPI_ISL_2774656, EPI_ISL_2774670, EPI_ISL_2774711, EPI_ISL_2774712                                                                                                                                                                                                             | see above                                                                                       | Mapmygenome                                                                                                                    | CSIR-Centre for Cellular and Molecular Biology-INSACOG                                    | ; Amreshwar Vodapalli; Ara Sreenivas; Archana Bharadwaj Siva; B Himasri; Blessy B John; Divya Tej Sowpatti; Jandhyala Sai Krishna; Karthik Bharadwaj Tallapaka; Lamuk Zaveri; Onkar Kulkarni; Payel Mukherjee; Priya Nukurthy; Rakesh K Mishra; Sharath Chandra Thota; Shreekant Verma; Sofia Banu; Sumedha Avadhania; Tulasi Nagabandi; Valli Nagalakshmi Undamatia; Vidhyadhari Methuku; Viswagithe S L                                                                                                                                                                                                                                                                                                                                                                                                                                                                                                                                                                              |                                                                                                                                            |
| EPI_ISL_2854188                                                                                                                                                                                                                                                                                                                                                                                       | Marang District Health Office                                                                   | Institute for Medical Research, Infectious Disease Research Centre, National Institutes of Health, Ministry of Health Malaysia |                                                                                           | Anasir Mi; Azizan MA; Kamel K; Mohd Zawawi Z; Ramly N; Robert F; Suppiah J; Thayran R                                                                                                                                                                                                                                                                                                                                                                                                                                                                                                                                                                                                                                                                                                                                                                                                                                                                                                  |                                                                                                                                            |
| EPI_ISL_4713039, EPI_ISL_4713066, EPI_ISL_4713419, EPI_ISL_4713613, EPI_ISL_4713662, EPI_ISL_4714685, EPI_ISL_4714783, EPI_ISL_4715232, EPI_ISL_4741511, EPI_ISL_4742176, EPI_ISL_5562580, EPI_ISL_5562896, EPI_ISL_5563582, EPI_ISL_5569207, EPI_ISL_5569400, EPI_ISL_5569404, EPI_ISL_5569447, EPI_ISL_5569705, EPI_ISL_5570445, EPI_ISL_5570477, EPI_ISL_5570569, EPI_ISL_5570577, EPI_ISL_5570615 | see above                                                                                       | Maria Reyna Xavier University Hospital                                                                                         | Philippine Genome Center                                                                  | Alethea R. de Guzman; Alyssa Joyce E. Telles; Anna Ong-Lim; Arienne A. Zamora; Benedict A. Maralit; Carlo M. Lapid; Celia Carlos; Cynthia P. Saloma; Devon Ray Pacial; Diomedes A. Cariño; Edsel Maurice Salvana; El King D. Morado; Elcid Aaron R. Pangilinan; Eva Maria Cutiongo-de la Paz; Francis A. Tablizo; Henrietta Marie Rodriguez; Jaime C. Montoya; Jan Michael C. Yap; Jarvin E. Nipales; Jo-Hannah S. Llames; John Q. Wong; Joshua Gregor A. Dizon; Juan Antonio R. Magalang; Karol Sophia Agape R. Padilla; Kenneth M. Kim; Kris P. Punayan; Kristina Patriz Dela Cruz; Lindsay Clare D.L. Carandang; Ma. Exanii Plantig; Marc Edsel C. Ayes; Maria Rosario Singh-Vergeire; Maria Sofia L. Yangzon; Marielle M. Gamboa; Marissa Alejandria; Niña Francesca Bustamante; Razel Nikka M. Hao; Renato Jacinto Q. Mantaring; Rianna Patricia S. Cruz; Shiela Mae M. Araiza; Yvonne Valerie Austria; Zipporah Mariebelle R. Enriquez; Zyrel V. Mollejon                        |                                                                                                                                            |
| EPI_ISL_4715049, EPI_ISL_4715241, EPI_ISL_4716520, EPI_ISL_4716734, EPI_ISL_4717075, EPI_ISL_4717204, EPI_ISL_4717370, EPI_ISL_4741441, EPI_ISL_5541141, EPI_ISL_5543283, EPI_ISL_5562464, EPI_ISL_5569276, EPI_ISL_5570741, EPI_ISL_5570746                                                                                                                                                          | see above                                                                                       | Mariano Marcos Memorial Hospital Medical Center                                                                                | Philippine Genome Center                                                                  | Alethea R. de Guzman; Alyssa Joyce E. Telles; Anna Ong-Lim; Arienne A. Zamora; Benedict A. Maralit; Carlo M. Lapid; Celia Carlos; Cynthia P. Saloma; Devon Ray Pacial; Diomedes A. Cariño; Edsel Maurice Salvana; El King D. Morado; Elcid Aaron R. Pangilinan; Eva Maria Cutiongo-de la Paz; Francis A. Tablizo; Henrietta Marie Rodriguez; Jaime C. Montoya; Jan Michael C. Yap; Jarvin E. Nipales; Jo-Hannah S. Llames; John Q. Wong; Joshua Gregor A. Dizon; Juan Antonio R. Magalang; Karol Sophia Agape R. Padilla; Kenneth M. Kim; Kris P. Punayan; Kristina Patriz Dela Cruz; Lindsay Clare D.L. Carandang; Ma. Exanii Plantig; Marc Edsel C. Ayes; Maria Rosario Singh-Vergeire; Maria Sofia L. Yangzon; Marielle M. Gamboa; Marissa Alejandria; Niña Francesca Bustamante; Razel Nikka M. Hao; Renato Jacinto Q. Mantaring; Rianna Patricia S. Cruz; Shiela Mae M. Araiza; Yvonne Valerie Austria; Zipporah Mariebelle R. Enriquez; Zyrel V. Mollejon                        |                                                                                                                                            |
| EPI_ISL_2859990, EPI_ISL_2860005, EPI_ISL_2860021, EPI_ISL_2860029, EPI_ISL_2860125, EPI_ISL_2860156, EPI_ISL_2860158, EPI_ISL_2860166, EPI_ISL_2860167, EPI_ISL_4741453, EPI_ISL_4741578, EPI_ISL_4741586, EPI_ISL_4741598, EPI_ISL_5542832, EPI_ISL_5542932, EPI_ISL_5568873, EPI_ISL_5569943, EPI_ISL_5570318, EPI_ISL_5570456, EPI_ISL_5570519, EPI_ISL_5570760, EPI_ISL_5570811                  | see above                                                                                       | Mary Mediatrix Medical Center                                                                                                  | Philippine Genome Center                                                                  | Alethea R. de Guzman; Alyssa Joyce E. Telles; Anna Ong-Lim; Arienne A. Zamora; Benedict A. Maralit; Carlo M. Lapid; Celia Carlos; Cynthia P. Saloma; Devon Ray Pacial; Diomedes A. Cariño; Edsel Maurice Salvana; Edsel Maurice Salvana; El King D. Morado; Elcid Aaron R. Pangilinan; Eva Maria Cutiongo-de la Paz; Francis A. Tablizo; Henrietta Marie Rodriguez; Jaime C. Montoya; Jan Michael C. Yap; Jarvin E. Nipales; Jo-Hannah S. Llames; John Q. Wong; Joshua Gregor A. Dizon; Juan Antonio R. Magalang; Karol Sophia Agape R. Padilla; Kenneth M. Kim; Kris P. Punayan; Kristina Patriz Dela Cruz; Lindsay Clare D.L. Carandang; Ma. Exanii Plantig; Marc Edsel C. Ayes; Maria Rosario Singh-Vergeire; Maria Sofia L. Yangzon; Marielle M. Gamboa; Marissa Alejandria; Niña Francesca Bustamante; Razel Nikka M. Hao; Renato Jacinto Q. Mantaring; Rianna Patricia S. Cruz; Shiela Mae M. Araiza; Yvonne Valerie Austria; Zipporah Mariebelle R. Enriquez; Zyrel V. Mollejon |                                                                                                                                            |
| EPI_ISL_2464602, EPI_ISL_2464620, EPI_ISL_3012075, EPI_ISL_3012176                                                                                                                                                                                                                                                                                                                                    | Maryland Genomics, Institute for Genome Sciences, University of Maryland School of Medicine     | Maryland Genomics, Institute for Genome Sciences, University of Maryland School of Medicine                                    |                                                                                           | Aditya; Claire M; Fraser; Hazen; Holly; Humphrys; Ivette; Jacques; Jonathan; Kranthi; Lim; Lisa D; Luke J; Mehta; Mike; Ott; Ravel; Roussey; Sadzewicz; Sandra; Santana-Cruz; Tallon; Tracy; Vavikolanu                                                                                                                                                                                                                                                                                                                                                                                                                                                                                                                                                                                                                                                                                                                                                                                |                                                                                                                                            |
| EPI_ISL_2550772                                                                                                                                                                                                                                                                                                                                                                                       | Maryland Public Health Laboratory (MD PHL)                                                      | Maryland Public Health Laboratory (MD PHL)                                                                                     |                                                                                           |                                                                                                                                                                                                                                                                                                                                                                                                                                                                                                                                                                                                                                                                                                                                                                                                                                                                                                                                                                                        | Maryland Department of Health Laboratories Administration                                                                                  |
| EPI_ISL_2400253                                                                                                                                                                                                                                                                                                                                                                                       | Massachusetts State Public Health Laboratory                                                    | Massachusetts State Public Health Laboratory                                                                                   |                                                                                           |                                                                                                                                                                                                                                                                                                                                                                                                                                                                                                                                                                                                                                                                                                                                                                                                                                                                                                                                                                                        | Andrew Lang; Glen Gallagher; Sandra Smole; Timelia Fink                                                                                    |
| EPI_ISL_2547354                                                                                                                                                                                                                                                                                                                                                                                       | Max Shapiro Clinic                                                                              | National Health Laboratory Service/University of Cape Town (NHLS/UCT)                                                          |                                                                                           | Arash Iranzadeh; Bruna Galvao; Carolyn Williamson; Deelan Doolabh; Diana Hardie; Gert Marais; Innocent Mudau; Lynn Tyers; Marvin Hsiao; Stephen Korsman                                                                                                                                                                                                                                                                                                                                                                                                                                                                                                                                                                                                                                                                                                                                                                                                                                |                                                                                                                                            |
| EPI_ISL_3233463, EPI_ISL_5050968                                                                                                                                                                                                                                                                                                                                                                      | Max von Pettenkofer Institute, Virology, National Reference Center for Retroviruses, LMU Munich | Laboratory for Functional Genome Analysis; Dept. Genomics; Gene Center of the LMU Munich                                       |                                                                                           |                                                                                                                                                                                                                                                                                                                                                                                                                                                                                                                                                                                                                                                                                                                                                                                                                                                                                                                                                                                        | Alexander Graf; Helmut Blum; Max Muenchhoff; Oliver Keppler; Stefan Krebs                                                                  |
| EPI_ISL_4301809                                                                                                                                                                                                                                                                                                                                                                                       | Mbabane Public Health Unit                                                                      | National Institute for Communicable                                                                                            |                                                                                           |                                                                                                                                                                                                                                                                                                                                                                                                                                                                                                                                                                                                                                                                                                                                                                                                                                                                                                                                                                                        | Amoako DG; Bhiman JN; Everatt J; Ismail A; Mahlangu B; Maphalala G; Mnguni A; Mohale T; Ntuli N; Scheepers C                               |



|                                                                                                                                                                                                                                                                                                                                                                                      |                                                                                              |                                                                                                                                              |                                                                                                                                                                                                                                                                                                                                                                                                                   |
|--------------------------------------------------------------------------------------------------------------------------------------------------------------------------------------------------------------------------------------------------------------------------------------------------------------------------------------------------------------------------------------|----------------------------------------------------------------------------------------------|----------------------------------------------------------------------------------------------------------------------------------------------|-------------------------------------------------------------------------------------------------------------------------------------------------------------------------------------------------------------------------------------------------------------------------------------------------------------------------------------------------------------------------------------------------------------------|
| see above                                                                                                                                                                                                                                                                                                                                                                            | NB-Hôpital Georges L. Dumont                                                                 | National Microbiology Laboratory (NML)                                                                                                       | Anna Majer; Anneliese Landgraff; CanCOGen's metadata curation team; Darian Hole; Elsie Grudskii; Gary Van Domselaar; Grace Seo; Guillaume Desnoyers; Jennifer Tanner; Kirsten Biggar; Madison Chapel; Morag Graham; Natalie Knox; Nathalie Bastien; Phiip Mabon; Public Health Agency of Canada CanCOGen team; Rhiannon Huzarewich; Richard Garceau; Russell Mandes; Shari Tyson; Timothy Booth; Yan Li           |
| EPI_ISL_4025743, EPI_ISL_4025863, EPI_ISL_4025864, EPI_ISL_4025869, EPI_ISL_4025873, EPI_ISL_4025875, EPI_ISL_4025876, EPI_ISL_4025877                                                                                                                                                                                                                                               | see above                                                                                    | NB-Hôpital Georges L. Dumont                                                                                                                 | New Brunswick - Vitalité Health Network<br>Allain E.; Chacko S.; Crapoulet N.; Desnoyers G.; Garceau R.; Lacroix J.; Shaw W.                                                                                                                                                                                                                                                                                      |
| EPI_ISL_3354090, EPI_ISL_3354104, EPI_ISL_3354281, EPI_ISL_3354349, EPI_ISL_3354354, EPI_ISL_3354644, EPI_ISL_3354654                                                                                                                                                                                                                                                                | see above                                                                                    | NC State Laboratory of Public Health                                                                                                         | Centers for Disease Control and Prevention Division of Viral Diseases, Pathogen Discovery<br>Alex Burgin; Ben Rambo-Martin; Clinton Paden; Dakota Howard; Dave Wentworth; Dhwani Batra; Jasmine Padilla; Justin Lee; Krista Queen; Kristen Knipe; Kristine Lacek; Mark Burroughs; Matthew Schmerer; Meghan Bentz; Mili Sheth; Peter Cook; Sam Shepard; Sarah Nobles; Suxiang Tong; Vivien Dugan; Yvette Unoarumhi |
| EPI_ISL_2467881, EPI_ISL_2562728                                                                                                                                                                                                                                                                                                                                                     | NC State Laboratory of Public Health                                                         | Genomics and Discovery, Respiratory Viruses Branch, Division of Viral Diseases, Centers for Disease Control and Prevention                   | Adam Retchless; Anna Kelleher; Anna Uehara; Brian Lynch; Clinton R. Paden; Dhwani Batra; Haibin Wang; Han Jia Justin Ng; Jasmine Padilla; Jing Zhang; Justin Lee; Krista Queen; Mark Burroughs; Mili Sheth; Morgan Davis; Peter Cook; Rachel Marine; Sarah Nobles; Suxiang Tong; Tara Coalter; Yan Li; Ying Tao                                                                                                   |
| EPI_ISL_3354829                                                                                                                                                                                                                                                                                                                                                                      | ND Dept. of Health Laboratory Services-Microbiology                                          | Centers for Disease Control and Prevention Division of Viral Diseases, Pathogen Discovery                                                    | Alex Burgin; Ben Rambo-Martin; Clinton Paden; Dakota Howard; Dave Wentworth; Dhwani Batra; Jasmine Padilla; Justin Lee; Krista Queen; Kristen Knipe; Kristine Lacek; Mark Burroughs; Matthew Schmerer; Meghan Bentz; Mili Sheth; Peter Cook; Sam Shepard; Sarah Nobles; Suxiang Tong; Vivien Dugan; Yvette Unoarumhi                                                                                              |
| EPI_ISL_3354835                                                                                                                                                                                                                                                                                                                                                                      | NE Public Health Laboratory                                                                  | Centers for Disease Control and Prevention Division of Viral Diseases, Pathogen Discovery                                                    | Alex Burgin; Ben Rambo-Martin; Clinton Paden; Dakota Howard; Dave Wentworth; Dhwani Batra; Jasmine Padilla; Justin Lee; Krista Queen; Kristen Knipe; Kristine Lacek; Mark Burroughs; Matthew Schmerer; Meghan Bentz; Mili Sheth; Peter Cook; Sam Shepard; Sarah Nobles; Suxiang Tong; Vivien Dugan; Yvette Unoarumhi                                                                                              |
| EPI_ISL_2710263, EPI_ISL_2710289, EPI_ISL_2710291, EPI_ISL_2770441, EPI_ISL_2770481                                                                                                                                                                                                                                                                                                  | NHLS Charlotte Maxeke Johannesburg Academic Hospital and the University of the Witwatersrand | KRISP, KZN Research Innovation and Sequencing Platform                                                                                       | Bulelani Manene; Florette Treurnicht; Giandhari Jennifer; Kathleen Subramoney; Naidoo Yeshnee; Pillay Sureshnee; San James; Tegally Houriiyah; Tshabula Derek; Wilkinson Eduan; Yajna Ramphal; de Oliveira Tulio                                                                                                                                                                                                  |
| EPI_ISL_2841643, EPI_ISL_2841648, EPI_ISL_3132522, EPI_ISL_3132552                                                                                                                                                                                                                                                                                                                   | NHLS Charlotte Maxeke Johannesburg Academic Hospital and the University of the Witwatersrand | KRISP, KZN Research Innovation and Sequencing Platform                                                                                       | Bulelani Manene; Florette Treurnicht; Giandhari Jennifer; Kathleen Subramoney; Naidoo Yeshnee; Pillay Sureshnee; San James; Tegally Houriiyah; Tshabula Derek; Wilkinson Eduan; Yajna Ramphal; de Oliveira Tulio                                                                                                                                                                                                  |
| EPI_ISL_3447850, EPI_ISL_3447851                                                                                                                                                                                                                                                                                                                                                     | NHLS Port Elizabeth Laboratory                                                               | KRISP, KZN Research Innovation and Sequencing Platform                                                                                       | Giandhari Jennifer; Naidoo Yeshnee; Pillay Sureshnee; San James; Tegally Houriiyah; Tshabula Derek; Wilkinson Eduan; Yajna Ramphal; de Oliveira Tulio                                                                                                                                                                                                                                                             |
| EPI_ISL_2802183, EPI_ISL_2802197                                                                                                                                                                                                                                                                                                                                                     | NHLS/UCT                                                                                     | NHLS/UCT                                                                                                                                     | Arash Iranzadeh; Bruna Galvao; Carolyn Williamson; Deelan Doolabh; Diana Hardie; Gert Marais; Innocent Mudau; Lynn Tyers; Marvin Hsiao; Stephen Korsman                                                                                                                                                                                                                                                           |
| EPI_ISL_3447715                                                                                                                                                                                                                                                                                                                                                                      | NHLS_JHB                                                                                     | KRISP, KZN Research Innovation and Sequencing Platform                                                                                       | Bulelani Manene; Florette Treurnicht; Giandhari Jennifer; Kathleen Subramoney; Naidoo Yeshnee; Pillay Sureshnee; San James; Tegally Houriiyah; Tshabula Derek; Wilkinson Eduan; Yajna Ramphal; de Oliveira Tulio                                                                                                                                                                                                  |
| EPI_ISL_2693074, EPI_ISL_2693075                                                                                                                                                                                                                                                                                                                                                     | NHLS_VIRO                                                                                    | KRISP, KZN Research Innovation and Sequencing Platform                                                                                       | Giandhari Jennifer; Naidoo Yeshnee; Pillay Sureshnee; San James; Tegally Houriiyah; Tshabula Derek; Wilkinson Eduan; Yajna Ramphal; de Oliveira Tulio                                                                                                                                                                                                                                                             |
| EPI_ISL_2494617, EPI_ISL_2494618, EPI_ISL_2494619, EPI_ISL_2494620, EPI_ISL_2494621, EPI_ISL_2494622, EPI_ISL_2494623, EPI_ISL_2494624, EPI_ISL_2494625, EPI_ISL_2494626                                                                                                                                                                                                             | see above                                                                                    | NHLS_VIRO                                                                                                                                    | KRISP, KZN Research Innovation and Sequencing Platform<br>Baillie Vicky; Giandhari Jennifer; Madhi Shabir; Naidoo Yeshnee; Pillay Sureshnee; San James; Tegally Houriiyah; Tshabula Derek; Wilkinson Eduan; de Oliveira Tulio; du Plessis Jeanine                                                                                                                                                                 |
| EPI_ISL_2693857, EPI_ISL_3275350, EPI_ISL_3275362, EPI_ISL_3275363, EPI_ISL_3275365, EPI_ISL_3275369, EPI_ISL_3275371, EPI_ISL_3275374, EPI_ISL_3275377, EPI_ISL_3275379                                                                                                                                                                                                             | see above                                                                                    | NHLS_VIRO Eastern Cape                                                                                                                       | KRISP, KZN Research Innovation and Sequencing Platform<br>Giandhari Jennifer; Laguda-Akingba O; Naidoo Yeshnee; Pillay Sureshnee; San James; Tegally Houriiyah; Tshabula Derek; Wilkinson Eduan; Yajna Ramphal; de Oliveira Tulio                                                                                                                                                                                 |
| EPI_ISL_2727195, EPI_ISL_2955454, EPI_ISL_2955487, EPI_ISL_2955488, EPI_ISL_2955497                                                                                                                                                                                                                                                                                                  | NHLS_VIRO Eastern Cape                                                                       | KRISP, KZN Research Innovation and Sequencing Platform                                                                                       | Emmanuel SJ; Giandhari J; Khan S; Laguda-Akingba O; Lessells R; Mdlalose K; Pillay S; Tegally H; Wilkinson E; York D; de Oliveira T                                                                                                                                                                                                                                                                               |
| EPI_ISL_2376117, EPI_ISL_3232180                                                                                                                                                                                                                                                                                                                                                     | NJDOH, Public Health and Environmental Laboratories                                          | NJ_PHEL                                                                                                                                      | Allison Roder; Byeong Jeong; Chelsea San Filippo; Dana Woell; Jacquelyn Deverell; Lindsey Bodnar; Ryan Pachucki; Shiv K. Verma                                                                                                                                                                                                                                                                                    |
| EPI_ISL_2547343                                                                                                                                                                                                                                                                                                                                                                      | NababEEP Hospital                                                                            | National Health Laboratory Service/University of Cape Town (NHLS/UCT)                                                                        | Arash Iranzadeh; Bruna Galvao; Carolyn Williamson; Deelan Doolabh; Diana Hardie; Gert Marais; Innocent Mudau; Lynn Tyers; Marvin Hsiao; Stephen Korsman                                                                                                                                                                                                                                                           |
| EPI_ISL_2798362                                                                                                                                                                                                                                                                                                                                                                      | Nacionālais medicīnas serviss - laboratorija, SIA                                            | Riga East University Hospital, National Microbiology Reference Laboratory; Eurofins Genomics Europe Sequencing GmbH                          | Arzu Alguleva; Diāna Dušacka; Dārta Pūpola; Ilva Pole; Inita Balta; Jevgenijs Bodrenko; Jūlija Čevere; Nataļja Mikena; Reinis Vangravs; Reinis Zeltmatis; Sergejs Nikišins; Ģirts Šķendērs                                                                                                                                                                                                                        |
| EPI_ISL_6506310, EPI_ISL_6506316, EPI_ISL_6506321, EPI_ISL_6506329, EPI_ISL_6506363, EPI_ISL_6506366, EPI_ISL_6506387, EPI_ISL_6506396, EPI_ISL_6506405, EPI_ISL_6506424, EPI_ISL_6506435, EPI_ISL_6506439, EPI_ISL_6506446, EPI_ISL_6506474, EPI_ISL_6506487, EPI_ISL_6506491, EPI_ISL_6506496, EPI_ISL_6506505, EPI_ISL_6506540, EPI_ISL_6506549, EPI_ISL_6506569, EPI_ISL_6506573 | see above                                                                                    | Namibia Institute of Pathology LTD                                                                                                           | CERI, Centre for Epidemic Response and Innovation, Stellenbosch University and KRISP, KZN Research Innovation and Sequencing Platform, UKZN.<br>Andreas Shiningavamwe; Giandhari Jennifer; Iyaloo Constantinus; Naidoo Yeshnee; Nathalia Garus-Oas; Ndahafa Frans; Ndumbu Pentikainen; Pillay Sureshnee; San James; Tegally Houriiyah; Tshabula Derek; Wilkinson Eduan; Yajna Ramphal; de Oliveira Tulio          |
| EPI_ISL_5327886, EPI_ISL_5327887, EPI_ISL_5327888, EPI_ISL_5327891, EPI_ISL_5327894, EPI_ISL_5327898, EPI_ISL_5327899, EPI_ISL_5327901, EPI_ISL_5327902, EPI_ISL_5327905, EPI_ISL_5327907, EPI_ISL_5327913, EPI_ISL_5327914, EPI_ISL_5327915                                                                                                                                         | see above                                                                                    | Namibia Institute of Pathology LTD, Windhoek Central Hospital                                                                                | CERI, Centre for Epidemic Response and Innovation, Stellenbosch University and KRISP, KZN Research Innovation and Sequencing Platform, UKZN.<br>Andreas Shiningavamwe; Giandhari Jennifer; Iyaloo Constantinus; Naidoo Yeshnee; Nathalia Garus-Oas; Ndahafa Frans; Ndumbu Pentikainen; Pillay Sureshnee; San James; Tegally Houriiyah; Tshabula Derek; Wilkinson Eduan; Yajna Ramphal; de Oliveira Tulio          |
| EPI_ISL_2433559, EPI_ISL_2433560, EPI_ISL_2433561, EPI_ISL_2433562, EPI_ISL_2433563, EPI_ISL_2433564, EPI_ISL_2433565, EPI_ISL_2433566, EPI_ISL_2433567, EPI_ISL_2433568, EPI_ISL_2433569, EPI_ISL_2433570, EPI_ISL_2433571, EPI_ISL_5030214, EPI_ISL_5030215, EPI_ISL_5030216                                                                                                       | see above                                                                                    | Naradhiwas Rajanagarindra Hospital                                                                                                           | Division of Genomic Medicine and Innovation support, Department of Medical Sciences, Ministry of Public Health, Thailand<br>Archawin Rojanawiwat; Jirapha Pakdee; Natthakul Bunneang; Nuanjun Wichukhinda; Penpitcha Thawong; Pailiuk Akkapaiboon Okada; Puntharika Pibonsiri; Surakameth Mahasirimongkol; Waritta Sawaengdee                                                                                     |
| EPI_ISL_2772528                                                                                                                                                                                                                                                                                                                                                                      | National Center of Infectious and Parasitic Diseases                                         | National Center of Infectious and Parasitic Diseases                                                                                         | Alexiev et al                                                                                                                                                                                                                                                                                                                                                                                                     |
| EPI_ISL_2460606, EPI_ISL_2460741, EPI_ISL_2460768, EPI_ISL_2460867, EPI_ISL_2460880, EPI_ISL_2461361, EPI_ISL_2461390                                                                                                                                                                                                                                                                | see above                                                                                    | National Centre for Disease Control (NCDC) Biotechnology Division, Delhi                                                                     | NCDC Delhi, Biotechnology Division INSACOG<br>Hema Gogia; Hemlata Lall; Kalaiarasan Ponnusamy; Mahesh S Dhar; Manoj K Singh; Meena Datta; Partha Rakshit; Preeti Madan; Priyanka Singh; Radhakrishnan V. S; Robin Marwal; Sandhya Kabra; Sujeet K Singh; Uma Sharma                                                                                                                                               |
| EPI_ISL_2493049, EPI_ISL_2493050, EPI_ISL_2493051, EPI_ISL_2493052, EPI_ISL_2493053, EPI_ISL_2493054, EPI_ISL_2493055, EPI_ISL_2493056, EPI_ISL_2493057, EPI_ISL_2686018, EPI_ISL_3730369                                                                                                                                                                                            | see above                                                                                    | National HIV Reference Laboratory, Ministry of Health, Public Health Institute of Malawi                                                     | CERI, Centre for Epidemic Response and Innovation, Stellenbosch University and KRISP, KZN Research Innovation and Sequencing Platform, UKZN.<br>Auld A; Chilima B; Chiwaula M; Emmanuel SJ; Giandhari J; Kaba M; Kampira E; Kasambara W; Kim L; Lessells R; Maida A; Mvula B; Mwangomba W; Naidoo Y; Panja L; Pillay S; Tegally H; Tshabula Derek; Wadonda N; Wilkinson E; de Oliveira T                          |
| EPI_ISL_2609566, EPI_ISL_2609567, EPI_ISL_2609568, EPI_ISL_2609569, EPI_ISL_2609570, EPI_ISL_2609571, EPI_ISL_2609572, EPI_ISL_2609573, EPI_ISL_2609574, EPI_ISL_2609575, EPI_ISL_2609576, EPI_ISL_2609579, EPI_ISL_2609580, EPI_ISL_2609583, EPI_ISL_2609584, EPI_ISL_2609585, EPI_ISL_2609586, EPI_ISL_2609588, EPI_ISL_2609589, EPI_ISL_2609591, EPI_ISL_2609592, EPI_ISL_2609593 | see above                                                                                    | National HIV Reference Laboratory, Ministry of Health, Public Health Institute of Malawi                                                     | KRISP, KZN Research Innovation and Sequencing Platform<br>Auld A; Chilima B; Chiwaula M; Emmanuel SJ; Giandhari J; Kaba M; Kampira E; Kasambara W; Kim L; Lessells R; Maida A; Mvula B; Mwangomba W; Naidoo Y; Panja L; Pillay S; Tegally H; Wadonda N; Wilkinson E; de Oliveira T                                                                                                                                |
| EPI_ISL_3663666                                                                                                                                                                                                                                                                                                                                                                      | National HIV Reference Laboratory, Ministry of Health, Public Health Institute of Malawi     | KRISP, KZN Research Innovation and Sequencing Platform                                                                                       | Auld A; Chilima B; Chiwaula M; Emmanuel SJ; Giandhari J; Kaba M; Kampira E; Kasambara W; Kim L; Lessells R; Maida A; Mvula B; Mwangomba W; Naidoo Y; Panja L; Pillay S; Tegally H; Tshabula Derek; Wadonda N; Wilkinson E; de Oliveira T                                                                                                                                                                          |
| EPI_ISL_6422293                                                                                                                                                                                                                                                                                                                                                                      | National Health Laboratory Service, Kwazulu-Natal, South Africa                              | CERI, Centre for Epidemic Response and Innovation, Stellenbosch University and KRISP, KZN Research Innovation and Sequencing Platform, UKZN. | Emmanuel SJ; Giandhari J; Naidoo Y; Nokukhanya Mdlalose; Pillay S; Tegally H; Wilkinson E; de Oliveira T                                                                                                                                                                                                                                                                                                          |

|                                                                                                                                                                                                                                                                                                                                                                                                                                         |                                                                                                |                                                                                        |                                                                                                                                              |                                                                                                                                                                                                                                                                                                                                                                                                                                                                                                                                                                                                                                                                                                                                                                                                                                                                                                                                                                   |
|-----------------------------------------------------------------------------------------------------------------------------------------------------------------------------------------------------------------------------------------------------------------------------------------------------------------------------------------------------------------------------------------------------------------------------------------|------------------------------------------------------------------------------------------------|----------------------------------------------------------------------------------------|----------------------------------------------------------------------------------------------------------------------------------------------|-------------------------------------------------------------------------------------------------------------------------------------------------------------------------------------------------------------------------------------------------------------------------------------------------------------------------------------------------------------------------------------------------------------------------------------------------------------------------------------------------------------------------------------------------------------------------------------------------------------------------------------------------------------------------------------------------------------------------------------------------------------------------------------------------------------------------------------------------------------------------------------------------------------------------------------------------------------------|
| EPI_ISL_2494886, EPI_ISL_2494887, EPI_ISL_2495046, EPI_ISL_2495047, EPI_ISL_2495049, EPI_ISL_2495050, EPI_ISL_2495051, EPI_ISL_2495052, EPI_ISL_2495053                                                                                                                                                                                                                                                                                 |                                                                                                |                                                                                        |                                                                                                                                              | Emmanuel SJ; Giandhari J; Khan S; Lessells R; Mdlalose K; Naidoo Y; Pillay S; Ramphal U; Tegally H; Wilkinson E; York D; de Oliveira T                                                                                                                                                                                                                                                                                                                                                                                                                                                                                                                                                                                                                                                                                                                                                                                                                            |
| see above                                                                                                                                                                                                                                                                                                                                                                                                                               | National Health Laboratory Service, South Africa                                               | KRISP, KZN Research Innovation and Sequencing Platform                                 |                                                                                                                                              |                                                                                                                                                                                                                                                                                                                                                                                                                                                                                                                                                                                                                                                                                                                                                                                                                                                                                                                                                                   |
| EPI_ISL_2617203, EPI_ISL_2617204, EPI_ISL_2617205, EPI_ISL_2617206, EPI_ISL_2617207, EPI_ISL_2617208, EPI_ISL_2617209, EPI_ISL_2617210, EPI_ISL_2617211, EPI_ISL_2617212, EPI_ISL_2617213, EPI_ISL_2617214, EPI_ISL_2617215, EPI_ISL_2688532, EPI_ISL_2688534, EPI_ISL_2688537, EPI_ISL_2688549, EPI_ISL_2688557, EPI_ISL_2688560, EPI_ISL_2688561, EPI_ISL_2688562, EPI_ISL_2688570, EPI_ISL_2688571, EPI_ISL_2688572, EPI_ISL_2688574 |                                                                                                |                                                                                        |                                                                                                                                              |                                                                                                                                                                                                                                                                                                                                                                                                                                                                                                                                                                                                                                                                                                                                                                                                                                                                                                                                                                   |
| see above                                                                                                                                                                                                                                                                                                                                                                                                                               | National Health Laboratory Service, South Africa                                               | KRISP, KZN Research Innovation and Sequencing Platform                                 |                                                                                                                                              | Giandhari Jennifer; Naidoo Yeshnee; Pillay Sureshnee; San James; Tegally Houriyah; Tshabulia Derek; Wilkinson Eduan; Yajna Ramphal; de Oliveira Tulo                                                                                                                                                                                                                                                                                                                                                                                                                                                                                                                                                                                                                                                                                                                                                                                                              |
| EPI_ISL_2873865, EPI_ISL_5751057, EPI_ISL_5751061                                                                                                                                                                                                                                                                                                                                                                                       | National Influenza Centre                                                                      | National Influenza Centre                                                              |                                                                                                                                              | ; Benjamin B. Lindsey; Benjamin H. Foulkes; Dennis La; Dennis Laryea; Ernest Asiedu; Franklin Asiedu-Bekoe; Gordon Awandare; Ivy A. Asante; Joseph Oliver-Commey; Joyce Ngoi; Linda Boatemaa; Lorreta Kwasa; Mathew D. Parker; Michael Marks; Mildred Adusei-Poku; Sharon Hsu; Thushan I de Silva; William K. Ampofo                                                                                                                                                                                                                                                                                                                                                                                                                                                                                                                                                                                                                                              |
| EPI_ISL_2447877, EPI_ISL_2447880, EPI_ISL_2447888, EPI_ISL_2662710, EPI_ISL_2662712, EPI_ISL_2662714, EPI_ISL_2662716, EPI_ISL_2662723, EPI_ISL_2662725, EPI_ISL_3101640, EPI_ISL_3219773, EPI_ISL_5477497                                                                                                                                                                                                                              |                                                                                                |                                                                                        |                                                                                                                                              |                                                                                                                                                                                                                                                                                                                                                                                                                                                                                                                                                                                                                                                                                                                                                                                                                                                                                                                                                                   |
| see above                                                                                                                                                                                                                                                                                                                                                                                                                               | National Institute for Communicable Diseases of the National Health Laboratory Service         | National Institute for Communicable Diseases of the National Health Laboratory Service |                                                                                                                                              | Amoako DG; Bhiman JN; Everatt J; Ismail A; Mahlangu B; Mnguni A; Mohale T; Ntuli N; Scheepers C                                                                                                                                                                                                                                                                                                                                                                                                                                                                                                                                                                                                                                                                                                                                                                                                                                                                   |
| EPI_ISL_2433937, EPI_ISL_2444396, EPI_ISL_2467934, EPI_ISL_2467941, EPI_ISL_2467942, EPI_ISL_2469470, EPI_ISL_2765569, EPI_ISL_2768014, EPI_ISL_2796519, EPI_ISL_2796521                                                                                                                                                                                                                                                                |                                                                                                |                                                                                        |                                                                                                                                              |                                                                                                                                                                                                                                                                                                                                                                                                                                                                                                                                                                                                                                                                                                                                                                                                                                                                                                                                                                   |
| see above                                                                                                                                                                                                                                                                                                                                                                                                                               | National Institute of Laboratory Medicine and Referral Center                                  | Genomic Research Lab, BCSIR                                                            |                                                                                                                                              | Abu Sayeed Mohammad Mahmud; Arifa Akram; Ashish Kumar Ghosh; Barna Goswami; Eshrar Osman; Iffat Jahani; Mahmuda Yeasmin; Md. Ahasan Habib; Md. Kamrul Islam; Md. Maruf Ahmed Molla; Md. Murshed Hasan Sarkar; Md. Salim Khan; Mohammad Mohi Uddin; Mohammad Samir Uzzaman; Shahina Akter; Tanjina Akhter Banu; Tasnim Nafisa                                                                                                                                                                                                                                                                                                                                                                                                                                                                                                                                                                                                                                      |
| EPI_ISL_2763640                                                                                                                                                                                                                                                                                                                                                                                                                         | National Institute of Laboratory Medicine and Referral Center,                                 | Genomic Research Lab, BCSIR                                                            |                                                                                                                                              | Arifa Akram; Ashish Kumar Ghosh; Barna Goswami; Eshrar Osman; Iffat Jahani; Mahmuda Yeasmin; Md. Ahasan Habib; Md. Kamrul Islam; Md. Maruf Ahmed Molla; Md. Murshed Hasan Sarkar; Md. Salim Khan; Mohammad Mohi Uddin; Mohammad Samir Uzzaman; Shahina Akter; Tanjina Akhter Banu; Tasnim Nafisa                                                                                                                                                                                                                                                                                                                                                                                                                                                                                                                                                                                                                                                                  |
| EPI_ISL_2686278, EPI_ISL_2686279, EPI_ISL_2932472, EPI_ISL_2932485, EPI_ISL_2932486, EPI_ISL_2932488, EPI_ISL_2932490, EPI_ISL_2932491                                                                                                                                                                                                                                                                                                  |                                                                                                |                                                                                        |                                                                                                                                              |                                                                                                                                                                                                                                                                                                                                                                                                                                                                                                                                                                                                                                                                                                                                                                                                                                                                                                                                                                   |
| see above                                                                                                                                                                                                                                                                                                                                                                                                                               | National Institute of Public Health                                                            | National Institute of Public Health                                                    |                                                                                                                                              | Alexander Nagy; Dusan Trnka; Helena Jirincova; Jaromira Vecerova; Timotej Suri                                                                                                                                                                                                                                                                                                                                                                                                                                                                                                                                                                                                                                                                                                                                                                                                                                                                                    |
| EPI_ISL_2466510, EPI_ISL_2674251                                                                                                                                                                                                                                                                                                                                                                                                        | National Institute of Public Health                                                            | State Veterinary Institute Prague                                                      |                                                                                                                                              | A; Cernikov; D; H; J; Jirincova; L; M; Nagy; Stara; Suri; T; Trnka; Vecerova                                                                                                                                                                                                                                                                                                                                                                                                                                                                                                                                                                                                                                                                                                                                                                                                                                                                                      |
| EPI_ISL_2928004, EPI_ISL_2928005, EPI_ISL_2928009, EPI_ISL_2928010, EPI_ISL_2928012                                                                                                                                                                                                                                                                                                                                                     | National Institute of Public Health, Bujumbura, Burundi, MRC/JVRI & LSHTM Uganda Research Unit | MRC/JVRI & LSHTM Uganda Research Unit, National Institute of Public Health             |                                                                                                                                              | Alexis Niyomwungere; Anatole Nkeshimana; Dan Lule Bugemba; Deogratius Ssemwanga; Jerome Nkurunziza; Léopold Ouedraogo; Matthew Cotten; My V.T. Phan; Pontiano Kaleebu                                                                                                                                                                                                                                                                                                                                                                                                                                                                                                                                                                                                                                                                                                                                                                                             |
| EPI_ISL_4741539, EPI_ISL_4741554, EPI_ISL_4741597, EPI_ISL_5540283, EPI_ISL_5541100, EPI_ISL_5541404, EPI_ISL_5541459, EPI_ISL_5541468, EPI_ISL_5541484, EPI_ISL_5562673, EPI_ISL_5570455, EPI_ISL_5570536                                                                                                                                                                                                                              |                                                                                                |                                                                                        |                                                                                                                                              |                                                                                                                                                                                                                                                                                                                                                                                                                                                                                                                                                                                                                                                                                                                                                                                                                                                                                                                                                                   |
| see above                                                                                                                                                                                                                                                                                                                                                                                                                               | National Kidney and Transplant Institute (NKT)                                                 | Philippine Genome Center                                                               |                                                                                                                                              | Alethea R. de Guzman; Alyssa Joyce E. Telles; Anna Ong-Lim; Arianne A. Zamora; Benedict A. Maralit; Carlo M. Lapid; Celia Carlos; Cynthia P. Saloma; Devon Ray Pacial; Diomedes A. Cariño; Edsel Maurice Salvana; El King D. Morado; Elcid Aaron R. Pangilinan; Eva Maria Cutiongo-de la Paz; Francis A. Tablizo; Henrietta Marie Rodriguez; Jaime C. Montoya; Jan Michael C. Yap; Jarvin E. Nipales; Jo-Hannah S. Llames; John Q. Wong; Joshua Gregor A. Dizon; Juan Antonio R. Magalang; Karol Sophia Agape R. Padilla; Kenneth M. Kim; Kris P. Punayan; Kristina Patriz Dela Cruz; Lindsay Clare D.L. Carandang; Ma. Exanii Planting; Marc Edsel C. Ayes; Maria Rosario Singh-Vergeire; Maria Sofia L. Yangzon; Marielle M. Gamboa; Marissa Alejandria; Niña Francesca Bustamante; Razel Nikka M. Hao; Renato Jacinto Q. Mantaring; Rianna Patricia S. Cruz; Shiela Mae M. Araiza; Yvonne Valerie Austria; Zipporah Mariebelle R. Enriquez; Zylrel V. Mollejon |
| EPI_ISL_2492741, EPI_ISL_2493038, EPI_ISL_2493042, EPI_ISL_2493043, EPI_ISL_2493044, EPI_ISL_2493045, EPI_ISL_2493046, EPI_ISL_2493047, EPI_ISL_2493048, EPI_ISL_2493058, EPI_ISL_2493059, EPI_ISL_2493060, EPI_ISL_2493061, EPI_ISL_2493062, EPI_ISL_2493063, EPI_ISL_2493064, EPI_ISL_2493065, EPI_ISL_2493066                                                                                                                        | see above                                                                                      | National Microbiology Reference Laboratory, Ministry of Health, Harare, Zimbabwe       | CERI, Centre for Epidemic Response and Innovation, Stellenbosch University and KRISP, KZN Research Innovation and Sequencing Platform, UKZN. | Agnes Juru; Air Comodor Dr J. Chimedza; Charles Nyagupe; Dr Raiva Simbi; Emmanuel SJ; Giandhari J; Hlanai Gumbo; Kenneth Maeka; Naidoo Y; Pillay S; Tapfumeani Mashe; Tatenda Takawira; Tegally H; Wilkinson E; de Oliveira T                                                                                                                                                                                                                                                                                                                                                                                                                                                                                                                                                                                                                                                                                                                                     |
| EPI_ISL_2379302, EPI_ISL_2379426, EPI_ISL_2466325, EPI_ISL_2483708, EPI_ISL_2687946                                                                                                                                                                                                                                                                                                                                                     | National Platform bis UMONS/Jolimont                                                           | National Platform bis UMONS/Jolimont                                                   |                                                                                                                                              | Florian Juszcak; François Dufrasne; Gautier Detry; Guillaume Bayon-Vicente; Ruddy Wattiez                                                                                                                                                                                                                                                                                                                                                                                                                                                                                                                                                                                                                                                                                                                                                                                                                                                                         |
| EPI_ISL_4739606, EPI_ISL_4739607, EPI_ISL_4739608, EPI_ISL_4739610, EPI_ISL_4739611, EPI_ISL_4739612, EPI_ISL_4739613                                                                                                                                                                                                                                                                                                                   | see above                                                                                      | National Public Health Laboratory (NPHL)                                               | National Institute for Communicable Diseases of the National Health Laboratory Service                                                       | Adba Alfatih AlEmam; Amira sulieman wadi; Bhiman JN; Elamin Abualas; Elham Rizgalla; Everatt J; Hatem ahmed babekher Tamadar tag elser; Ismail A; Mahlangu B; Mnguni A; Mohale T; Mohamed Hassan Abdoelraheem Amoako DG; Muntaser elTayeb Ibrahim; Ntuli N; Shahinaz.A. Bedri; Youusif Bahih Makki                                                                                                                                                                                                                                                                                                                                                                                                                                                                                                                                                                                                                                                                |
| EPI_ISL_2508715, EPI_ISL_2508716, EPI_ISL_2508723, EPI_ISL_2508724, EPI_ISL_2508725, EPI_ISL_2508801, EPI_ISL_2508802, EPI_ISL_2508803, EPI_ISL_2508804, EPI_ISL_2508888, EPI_ISL_2509024, EPI_ISL_2509025, EPI_ISL_2509026, EPI_ISL_2509027, EPI_ISL_2509028, EPI_ISL_2621921, EPI_ISL_2627533, EPI_ISL_2790332, EPI_ISL_2978661, EPI_ISL_2982258                                                                                      | see above                                                                                      | National Public Health Laboratory, National Centre for Infectious Diseases             | National Public Health Laboratory, National Centre for Infectious Diseases                                                                   | Katherine Ching; Lin Cui; Raymond Tzer Pin Lin; Royce Ang; Tze Minn Mak; Zhenyang Zhou                                                                                                                                                                                                                                                                                                                                                                                                                                                                                                                                                                                                                                                                                                                                                                                                                                                                            |
| EPI_ISL_2858682, EPI_ISL_3845417, EPI_ISL_3920372, EPI_ISL_3920373                                                                                                                                                                                                                                                                                                                                                                      | Naval Medical Research Unit No. 3                                                              | Naval Medical Research Center Biological Defense Research Directorate                  |                                                                                                                                              | Andrea E. Luquette; Andrew J. Bennett; Bishwo N. Adhikari; Catherine E. Arnold; Chaselynn M. Watters; Emily K. Stefanov; Francisco Malagon; Kyle A. Long; Lindsay A. Glang; Logan J. Voegtly; Luis A. Estrella; Michael V. Deschenes; Regina Z. Cer; Robin H. Miller; Stephen M. Eggan; and Kimberly A. Bishop-Lilly                                                                                                                                                                                                                                                                                                                                                                                                                                                                                                                                                                                                                                              |
| EPI_ISL_2466736, EPI_ISL_2466737, EPI_ISL_2466738, EPI_ISL_2645761, EPI_ISL_2645786, EPI_ISL_2774546, EPI_ISL_3347502                                                                                                                                                                                                                                                                                                                   | see above                                                                                      | Nebraska Public Health Laboratory                                                      | NPHL COVID-19 Response Team                                                                                                                  | NPHL COVID-19 Response Team                                                                                                                                                                                                                                                                                                                                                                                                                                                                                                                                                                                                                                                                                                                                                                                                                                                                                                                                       |
| EPI_ISL_5547884                                                                                                                                                                                                                                                                                                                                                                                                                         | Negros Oriental Provincial Hospital                                                            | Philippine Genome Center                                                               |                                                                                                                                              | Alethea R. de Guzman; Anna Ong-Lim; Arianne A. Zamora; Benedict A. Maralit; Carlo M. Lapid; Celia Carlos; Cynthia P. Saloma; Devon Ray Pacial; Diomedes A. Cariño; Edsel Maurice Salvana; El King D. Morado; Elcid Aaron R. Pangilinan; Eva Maria Cutiongo-de la Paz; Francis A. Tablizo; Henrietta Marie Rodriguez; Jaime C. Montoya; Jan Michael C. Yap; Jarvin E. Nipales; Jo-Hannah S. Llames; John Q. Wong; Joshua Gregor A. Dizon; Juan Antonio R. Magalang; Karol Sophia Agape R. Padilla; Kenneth M. Kim; Kris P. Punayan; Kristina Patriz Dela Cruz; Lindsay Clare D.L. Carandang; Ma. Exanii Planting; Marc Edsel C. Ayes; Maria Rosario Singh-Vergeire; Maria Sofia L. Yangzon; Marielle M. Gamboa; Marissa Alejandria; Niña Francesca Bustamante; Razel Nikka M. Hao; Renato Jacinto Q. Mantaring; Rianna Patricia S. Cruz; Shiela Mae M. Araiza; Yvonne Valerie Austria; Zipporah Mariebelle R. Enriquez; Zylrel V. Mollejon                         |
| EPI_ISL_3506437                                                                                                                                                                                                                                                                                                                                                                                                                         | Nelspoort Clinic wc NPP                                                                        | NHLs/UCT                                                                               |                                                                                                                                              | Arash Iranzadeh; Bruna Galvao; Carolyn Williamson; Deelan Doolabh; Diana Hardie; Gert Marais; Innocent Mudau; Lynn Tyers; Marvin Hsiao; Rageema Joseph; Sisonke; Stephen Korsman                                                                                                                                                                                                                                                                                                                                                                                                                                                                                                                                                                                                                                                                                                                                                                                  |
| EPI_ISL_2547420                                                                                                                                                                                                                                                                                                                                                                                                                         | Nelspoort Clinic wc NPP                                                                        | National Health Laboratory Service/University of Cape Town (NHLs/UCT)                  |                                                                                                                                              | Arash Iranzadeh; Bruna Galvao; Carolyn Williamson; Deelan Doolabh; Diana Hardie; Gert Marais; Innocent Mudau; Lynn Tyers; Marvin Hsiao; Stephen Korsman                                                                                                                                                                                                                                                                                                                                                                                                                                                                                                                                                                                                                                                                                                                                                                                                           |
| EPI_ISL_2770489                                                                                                                                                                                                                                                                                                                                                                                                                         | Netcare Kingsway                                                                               | KRISP, KZN Research Innovation and Sequencing Platform                                 |                                                                                                                                              | Giandhari Jennifer; Naidoo Yeshnee; Pillay Sureshnee; San James; Tegally Houriyah; Tshabulia Derek; Wilkinson Eduan; Yajna Ramphal; de Oliveira Tulo                                                                                                                                                                                                                                                                                                                                                                                                                                                                                                                                                                                                                                                                                                                                                                                                              |
| EPI_ISL_2501092, EPI_ISL_2501094, EPI_ISL_2501095                                                                                                                                                                                                                                                                                                                                                                                       | Netcare St Augustines Hospital                                                                 | KRISP, KZN Research Innovation and Sequencing Platform                                 |                                                                                                                                              | Emmanuel SJ; Giandhari J; Khan S; Lessells R; Mdlalose K; Naidoo Y; Pillay S; Ramphal U; Sisonke Team; Tegally H; Wilkinson E; York D; de Oliveira T                                                                                                                                                                                                                                                                                                                                                                                                                                                                                                                                                                                                                                                                                                                                                                                                              |
| EPI_ISL_3132631                                                                                                                                                                                                                                                                                                                                                                                                                         | Netcare Umhlanga - Chronic patient                                                             | KRISP, KZN Research Innovation and Sequencing Platform                                 |                                                                                                                                              | Giandhari Jennifer; Naidoo Yeshnee; Pillay Sureshnee; San James; Tegally Houriyah; Tshabulia Derek; Wilkinson Eduan; Yajna Ramphal; de Oliveira Tulo                                                                                                                                                                                                                                                                                                                                                                                                                                                                                                                                                                                                                                                                                                                                                                                                              |
| EPI_ISL_4877878                                                                                                                                                                                                                                                                                                                                                                                                                         | Nevada State Public Health Laboratory                                                          | Nevada State Public Health Laboratory                                                  |                                                                                                                                              | Andrew Gorzalski; Mark Pandori                                                                                                                                                                                                                                                                                                                                                                                                                                                                                                                                                                                                                                                                                                                                                                                                                                                                                                                                    |
| EPI_ISL_2375950                                                                                                                                                                                                                                                                                                                                                                                                                         | New Horizon Clinic wc NZC                                                                      | NHLs/UCT                                                                               |                                                                                                                                              | Arash Iranzadeh; Bruna Galvao; Carolyn Williamson; Deelan Doolabh; Diana Hardie; Innocent Mudau; Kruger Marais; Lynn Tyers; Marvin Hsiao; Stephen Korsman                                                                                                                                                                                                                                                                                                                                                                                                                                                                                                                                                                                                                                                                                                                                                                                                         |
| EPI_ISL_3548416                                                                                                                                                                                                                                                                                                                                                                                                                         | New Mexico Department of Health Scientific Laboratory                                          | Center for Global Health, University of New Mexico Health Sciences Center              |                                                                                                                                              | Anastacia Griego; Darrell Dinwiddie; Daryl Domman; Joseph Hicks; Kurt Schwalm; Michael Edwards; Twila Kunde; Valerie Morley                                                                                                                                                                                                                                                                                                                                                                                                                                                                                                                                                                                                                                                                                                                                                                                                                                       |
| EPI_ISL_2802124, EPI_ISL_5524621                                                                                                                                                                                                                                                                                                                                                                                                        | New Somerset Hospital wc NSH                                                                   | NHLs/UCT                                                                               |                                                                                                                                              | Arash Iranzadeh; Bruna Galvao; Carolyn Williamson; Deelan Doolabh; Diana Hardie; Gert Marais; Innocent Mudau; Lynn Tyers; Marvin Hsiao; Rageema Joseph; Stephen Korsman                                                                                                                                                                                                                                                                                                                                                                                                                                                                                                                                                                                                                                                                                                                                                                                           |
| EPI_ISL_2455229                                                                                                                                                                                                                                                                                                                                                                                                                         | New South Wales Health Pathology Royal Prince Alfred Hospital                                  | Microbiology RPAH                                                                      |                                                                                                                                              | Au, J.; Bull, R.; Deveson, I.; Foster, C.; Rawlinson, W.; Ruiz Silva, M.; Van Hal, S.                                                                                                                                                                                                                                                                                                                                                                                                                                                                                                                                                                                                                                                                                                                                                                                                                                                                             |
| EPI_ISL_2632328, EPI_ISL_2632814, EPI_ISL_2632815, EPI_ISL_2632822                                                                                                                                                                                                                                                                                                                                                                      | Niedersächsisches Landesgesundheitsamt (NLGA)                                                  | Robert Koch Institute                                                                  |                                                                                                                                              |                                                                                                                                                                                                                                                                                                                                                                                                                                                                                                                                                                                                                                                                                                                                                                                                                                                                                                                                                                   |
| EPI_ISL_2506764, EPI_ISL_2507538, EPI_ISL_2507539, EPI_ISL_2507540, EPI_ISL_2507541, EPI_ISL_2507542, EPI_ISL_2507778, EPI_ISL_2507779, EPI_ISL_2507961, EPI_ISL_2508140, EPI_ISL_2508199                                                                                                                                                                                                                                               | see above                                                                                      | NordLab Kajaani                                                                        | Expert Microbiology, National Institute for Health and Welfare                                                                               | Carita Savolainen-Kopra; Erika Lindh; Haider al-Hello; Jani Halkilahti; Kirsi Liitsola; Niina Ikonen; Olli Vapalahti; Pekka Ellonen; Phuoc Truong; Päivi Laurila; Ravi Kant; Sari Hannula; Soile Blomqvist; Teemu Smura                                                                                                                                                                                                                                                                                                                                                                                                                                                                                                                                                                                                                                                                                                                                           |
| EPI_ISL_2363846                                                                                                                                                                                                                                                                                                                                                                                                                         | NordLab Kemi                                                                                   | Expert Microbiology, National Institute for Health and Welfare                         |                                                                                                                                              | Carita Savolainen-Kopra; Erika Lindh; Haider al-Hello; Jani Halkilahti; Kirsi Liitsola; Niina Ikonen; Pekka Ellonen; Päivi Laurila; Sari Hannula; Soile Blomqvist; Teemu Smura                                                                                                                                                                                                                                                                                                                                                                                                                                                                                                                                                                                                                                                                                                                                                                                    |
| EPI_ISL_2508315                                                                                                                                                                                                                                                                                                                                                                                                                         | NordLab Kokkola                                                                                | Expert Microbiology, National Institute for Health and Welfare                         |                                                                                                                                              | Carita Savolainen-Kopra; Erika Lindh; Haider al-Hello; Jani Halkilahti; Kirsi Liitsola; Niina Ikonen; Olli Vapalahti; Pekka Ellonen; Phuoc Truong; Päivi Laurila; Ravi Kant; Sari Hannula; Soile Blomqvist; Teemu Smura                                                                                                                                                                                                                                                                                                                                                                                                                                                                                                                                                                                                                                                                                                                                           |
| EPI_ISL_2363940, EPI_ISL_2363951, EPI_ISL_2363966, EPI_ISL_2505377, EPI_ISL_2505378, EPI_ISL_2505386, EPI_ISL_2505598, EPI_ISL_2505600, EPI_ISL_2505710, EPI_ISL_2505830, EPI_ISL_2506207, EPI_ISL_2506643, EPI_ISL_2506793, EPI_ISL_2506797, EPI_ISL_2506800, EPI_ISL_2506801, EPI_ISL_2506802, EPI_ISL_2507429, EPI_ISL_2507430, EPI_ISL_2507433, EPI_ISL_2507446, EPI_ISL_2507447,                                                   |                                                                                                |                                                                                        |                                                                                                                                              |                                                                                                                                                                                                                                                                                                                                                                                                                                                                                                                                                                                                                                                                                                                                                                                                                                                                                                                                                                   |



|                                                                                                                                                                                                                                                                                                                                                                                                                                                                                                                                                                                                                                                                                                                                                                                                                                                                                                                                                                                                                                                                                                                                |                                                                                                                     |                                                                                                                                |                                                                                                                                                                                                                                                                                                                                                                                                                                                                                                                                                                                                                                                                                                                                                                                                                                                                                                                                                                                                               |
|--------------------------------------------------------------------------------------------------------------------------------------------------------------------------------------------------------------------------------------------------------------------------------------------------------------------------------------------------------------------------------------------------------------------------------------------------------------------------------------------------------------------------------------------------------------------------------------------------------------------------------------------------------------------------------------------------------------------------------------------------------------------------------------------------------------------------------------------------------------------------------------------------------------------------------------------------------------------------------------------------------------------------------------------------------------------------------------------------------------------------------|---------------------------------------------------------------------------------------------------------------------|--------------------------------------------------------------------------------------------------------------------------------|---------------------------------------------------------------------------------------------------------------------------------------------------------------------------------------------------------------------------------------------------------------------------------------------------------------------------------------------------------------------------------------------------------------------------------------------------------------------------------------------------------------------------------------------------------------------------------------------------------------------------------------------------------------------------------------------------------------------------------------------------------------------------------------------------------------------------------------------------------------------------------------------------------------------------------------------------------------------------------------------------------------|
| EPI_ISL_5541466                                                                                                                                                                                                                                                                                                                                                                                                                                                                                                                                                                                                                                                                                                                                                                                                                                                                                                                                                                                                                                                                                                                |                                                                                                                     |                                                                                                                                | Marie Rodriguez; Jaime C. Montoya; Jan Michael C. Yap; Jarvin E. Nipales; Jo-Hannah S. Llames; John Q. Wong; Joshua Gregor A. Dizon; Juan Antonio R. Magalang; Karol Sophia Agape R. Padilla; Kenneth M. Kim; Kris P. Punayan; Kristina Patriz Dela Cruz; Lindsay Clare D.L. Carandang; Ma. Exanii Plantig; Marc Edsel C. Ayes; Maria Rosario Singh-Vergeire; Maria Sofia L. Yangzon; Marielle M. Gamboa; Marissa Alejandria; Niña Francesca Bustamante; Razel Nikka M. Hao; Renato Jacinto Q. Mantaring; Rianna Patricia S. Cruz; Shiela Mae M. Araiza; Yvonne Valerie Austria; Zipporah Mariebelle R. Enriquez; Zyrel V. Mollejon                                                                                                                                                                                                                                                                                                                                                                           |
| EPI_ISL_5051473                                                                                                                                                                                                                                                                                                                                                                                                                                                                                                                                                                                                                                                                                                                                                                                                                                                                                                                                                                                                                                                                                                                | Ospital ng Parañaque                                                                                                | Research Institute for Tropical Medicine                                                                                       | Allen Anthony Laraño; Catalino Demetria; Francisco Gerardo Polotan; Hannah Leah Morito; Inez Andrea Medado; Jefferson Earl Halog; Lei Lanna Dancel; Leilanie Nacion; Ma. Angelica Tujan                                                                                                                                                                                                                                                                                                                                                                                                                                                                                                                                                                                                                                                                                                                                                                                                                       |
| EPI_ISL_2483103                                                                                                                                                                                                                                                                                                                                                                                                                                                                                                                                                                                                                                                                                                                                                                                                                                                                                                                                                                                                                                                                                                                | Ostfold Hospital Trust - Kalmes, Centre for Laboratory Medicine, Section for gene technology and infection serology | Norwegian Institute of Public Health, Department of Virology                                                                   | Atiya R Ali; Debec Nadia; Engebretsen Serina Beate; Garcia Llorente Ignacio; Hilde Elshaug; Hilde Vollan; Jon Bråte; Kamilla Heddeland Instefjord; Karoline Bragstad; Kathrine Stene-Johansen; Line Victoria Moen; Marie Paulsen Madsen; Olav Hugnnes; Pedersen Benedikte Nevjen; Rasmus Riis Kopperud                                                                                                                                                                                                                                                                                                                                                                                                                                                                                                                                                                                                                                                                                                        |
| EPI_ISL_3957790                                                                                                                                                                                                                                                                                                                                                                                                                                                                                                                                                                                                                                                                                                                                                                                                                                                                                                                                                                                                                                                                                                                | Oudtshoorn Hospital wc OUD                                                                                          | NHLS/UCT                                                                                                                       | Arash Iranzadeh; Bruna Galvao; Carolyn Williamson; Deelan Doolabh; Diana Hardie; Gert Marais; Innocent Mudau; Lynn Tyers; Marvin Hsiao; Rageema Joseph; Stephen Korsman                                                                                                                                                                                                                                                                                                                                                                                                                                                                                                                                                                                                                                                                                                                                                                                                                                       |
| EPI_ISL_3979687                                                                                                                                                                                                                                                                                                                                                                                                                                                                                                                                                                                                                                                                                                                                                                                                                                                                                                                                                                                                                                                                                                                | Outre Mer                                                                                                           | National Reference Centre for Viruses of Respiratory Infections, Institut Pasteur, Paris                                       | Angela Brisebarre; Camille Capel; Christophe Malabat; Corinne Maufrais; Etienne Simon-Lorière; Frédéric Lemoine; Julien Fumey; Louise Lefrançois; Marion Barbet; Maud Vanpeene; Méline Bizard; Patrice Combe; Slim El-Khiari; Sylvie Behilli; Sylvie Van der Werf; Vincent Enouf                                                                                                                                                                                                                                                                                                                                                                                                                                                                                                                                                                                                                                                                                                                              |
| EPI_ISL_2695584, EPI_ISL_2695585                                                                                                                                                                                                                                                                                                                                                                                                                                                                                                                                                                                                                                                                                                                                                                                                                                                                                                                                                                                                                                                                                               | PATHCARE LABORATORY                                                                                                 | National Institute for Communicable Diseases of the National Health Laboratory Service                                         | Amoako DG; Bhiman JN; Everatt J; Ismail A; Mahlangu B; Mnguni A; Mohale T; Ntuli N; Scheepers C                                                                                                                                                                                                                                                                                                                                                                                                                                                                                                                                                                                                                                                                                                                                                                                                                                                                                                               |
| EPI_ISL_4122479                                                                                                                                                                                                                                                                                                                                                                                                                                                                                                                                                                                                                                                                                                                                                                                                                                                                                                                                                                                                                                                                                                                | PEJ KESIHATAN BARAT DAYA                                                                                            | iPROMISE, UTM                                                                                                                  | Ariza Adnan; Fadzilah Mohd Nor; Lim Wei Feng; Mohd Asif Mohd Sukri; Mohd Nur Fakhruzzaman Noorizhab; Mohd Zaki Salleh; Sazzil Shahlan Kassim; Siti Farah Alwani Mohd Nawil; Siti Hamimah Sheikh Abdul Kadir; Teh Lay Kay; Wang Seok Mui                                                                                                                                                                                                                                                                                                                                                                                                                                                                                                                                                                                                                                                                                                                                                                       |
| EPI_ISL_4549096, EPI_ISL_4549100                                                                                                                                                                                                                                                                                                                                                                                                                                                                                                                                                                                                                                                                                                                                                                                                                                                                                                                                                                                                                                                                                               | PGR Soins de Suite Gériatrique                                                                                      | CHU Pontchaillou                                                                                                               | DE TAYRAC Marie; DENOUEL Florent; ETCHEVERRY Amandine; FEBREAU Christine; GALIBERT Marie Dominique; GROULHER Claire; JAGLINE Steven; PRONIER Charlotte; QUENET Benjamin; SASSI Mohamed; THIBAUT Vincent                                                                                                                                                                                                                                                                                                                                                                                                                                                                                                                                                                                                                                                                                                                                                                                                       |
| EPI_ISL_5542622, EPI_ISL_5542946, EPI_ISL_5543262, EPI_ISL_5543302, EPI_ISL_5544052, EPI_ISL_5544096                                                                                                                                                                                                                                                                                                                                                                                                                                                                                                                                                                                                                                                                                                                                                                                                                                                                                                                                                                                                                           | PHILIPPINE GENERAL HOSPITAL (PGH)                                                                                   | Philippine Genome Center                                                                                                       | Alethea R. de Guzman; Anna Ong-Lim; Arianne A. Zamora; Benedict A. Maralit; Carlo M. Lapid; Celia Carlos; Cynthia P. Saloma; Devon Ray Pacial; Diomedes A. Cariño; Edsel Maurice Salvana; El King D. Morado; Elcid Aaron R. Pangilinan; Eva Maria Cutiongo-de la Paz; Francis A. Tablizo; Henrietta Marie Rodriguez; Jaime C. Montoya; Jan Michael C. Yap; Jarvin E. Nipales; Jo-Hannah S. Llames; John Q. Wong; Joshua Gregor A. Dizon; Juan Antonio R. Magalang; Karol Sophia Agape R. Padilla; Kenneth M. Kim; Kris P. Punayan; Kristina Patriz Dela Cruz; Lindsay Clare D.L. Carandang; Ma. Exanii Plantig; Marc Edsel C. Ayes; Maria Rosario Singh-Vergeire; Maria Sofia L. Yangzon; Marielle M. Gamboa; Marissa Alejandria; Niña Francesca Bustamante; Razel Nikka M. Hao; Renato Jacinto Q. Mantaring; Rianna Patricia S. Cruz; Shiela Mae M. Araiza; Yvonne Valerie Austria; Zipporah Mariebelle R. Enriquez; Zyrel V. Mollejon                                                                       |
| EPI_ISL_2629520                                                                                                                                                                                                                                                                                                                                                                                                                                                                                                                                                                                                                                                                                                                                                                                                                                                                                                                                                                                                                                                                                                                | PLATEAU TECHNIQUE L'ABO+                                                                                            | CNR Virus des Infections Respiratoires - France SUD                                                                            | Antonin Bal; Bruno Lina; Bruno Simon; Gregory Destras; Gwendolynne Burfin; Hadrien Reque; Laurence Josset; Martine Valette; Quentin Semanas                                                                                                                                                                                                                                                                                                                                                                                                                                                                                                                                                                                                                                                                                                                                                                                                                                                                   |
| EPI_ISL_2827168, EPI_ISL_3030426                                                                                                                                                                                                                                                                                                                                                                                                                                                                                                                                                                                                                                                                                                                                                                                                                                                                                                                                                                                                                                                                                               | POLOKWANE LABORATORY                                                                                                | National Institute for Communicable Diseases of the National Health Laboratory Service                                         | Amoako DG; Bhiman JN; Everatt J; Ismail A; Mahlangu B; Mnguni A; Mohale T; Ntuli N; Scheepers C                                                                                                                                                                                                                                                                                                                                                                                                                                                                                                                                                                                                                                                                                                                                                                                                                                                                                                               |
| EPI_ISL_2695541, EPI_ISL_2695542, EPI_ISL_2695544, EPI_ISL_2695545, EPI_ISL_2695546, EPI_ISL_2695547, EPI_ISL_2695552, EPI_ISL_2695553, EPI_ISL_2695554, EPI_ISL_2695558, EPI_ISL_2695559, EPI_ISL_2695560, EPI_ISL_2695563, EPI_ISL_2695567, EPI_ISL_2695568, EPI_ISL_2695571, EPI_ISL_2695575, EPI_ISL_2695577, EPI_ISL_2695582, EPI_ISL_2709851, EPI_ISL_2709862                                                                                                                                                                                                                                                                                                                                                                                                                                                                                                                                                                                                                                                                                                                                                            | see above<br>POLOKWANE MANKWENG HOSPITAL                                                                            | National Institute for Communicable Diseases of the National Health Laboratory Service                                         | Amoako DG; Bhiman JN; Everatt J; Ismail A; Mahlangu B; Mnguni A; Mohale T; Ntuli N; Scheepers C                                                                                                                                                                                                                                                                                                                                                                                                                                                                                                                                                                                                                                                                                                                                                                                                                                                                                                               |
| EPI_ISL_2582702, EPI_ISL_2582710, EPI_ISL_2582720, EPI_ISL_2895733, EPI_ISL_2895743, EPI_ISL_2895748, EPI_ISL_3411644, EPI_ISL_3451075, EPI_ISL_3643878, EPI_ISL_3643975, EPI_ISL_3643976, EPI_ISL_3643977, EPI_ISL_3643978, EPI_ISL_3643979, EPI_ISL_3717933, EPI_ISL_3717997, EPI_ISL_3718001, EPI_ISL_3718002                                                                                                                                                                                                                                                                                                                                                                                                                                                                                                                                                                                                                                                                                                                                                                                                               | see above<br>PORT ELIZABETH LABORATORY                                                                              | National Institute for Communicable Diseases of the National Health Laboratory Service                                         | Amoako DG; Bhiman JN; Everatt J; Ismail A; Mahlangu B; Mnguni A; Mohale T; Ntuli N; Scheepers C                                                                                                                                                                                                                                                                                                                                                                                                                                                                                                                                                                                                                                                                                                                                                                                                                                                                                                               |
| EPI_ISL_2984939                                                                                                                                                                                                                                                                                                                                                                                                                                                                                                                                                                                                                                                                                                                                                                                                                                                                                                                                                                                                                                                                                                                | POTCHEFSTROOM                                                                                                       | National Institute for Communicable Diseases of the National Health Laboratory Service                                         | Amoako DG; Bhiman JN; Everatt J; Ismail A; Mahlangu B; Mnguni A; Mohale T; Ntuli N; Scheepers C                                                                                                                                                                                                                                                                                                                                                                                                                                                                                                                                                                                                                                                                                                                                                                                                                                                                                                               |
| EPI_ISL_2827909, EPI_ISL_2827922, EPI_ISL_2827926, EPI_ISL_3838309                                                                                                                                                                                                                                                                                                                                                                                                                                                                                                                                                                                                                                                                                                                                                                                                                                                                                                                                                                                                                                                             | POTCHEFSTROOM LABORATORY                                                                                            | National Institute for Communicable Diseases of the National Health Laboratory Service                                         | Amoako DG; Bhiman JN; Everatt J; Ismail A; Mahlangu B; Mnguni A; Mohale T; Ntuli N; Scheepers C                                                                                                                                                                                                                                                                                                                                                                                                                                                                                                                                                                                                                                                                                                                                                                                                                                                                                                               |
| EPI_ISL_4712048                                                                                                                                                                                                                                                                                                                                                                                                                                                                                                                                                                                                                                                                                                                                                                                                                                                                                                                                                                                                                                                                                                                | PRC SUBIC MOLECULAR LABORATORY                                                                                      | Philippine Genome Center                                                                                                       | Alethea R. de Guzman; Anna Ong-Lim; Arianne A. Zamora; Benedict A. Maralit; Carlo M. Lapid; Celia Carlos; Cynthia P. Saloma; Devon Ray Pacial; Diomedes A. Cariño; Edsel Maurice Salvana; El King D. Morado; Elcid Aaron R. Pangilinan; Eva Maria Cutiongo-de la Paz; Francis A. Tablizo; Henrietta Marie Rodriguez; Jaime C. Montoya; Jan Michael C. Yap; Jarvin E. Nipales; Jo-Hannah S. Llames; John Q. Wong; Joshua Gregor A. Dizon; Juan Antonio R. Magalang; Karol Sophia Agape R. Padilla; Kenneth M. Kim; Kris P. Punayan; Kristina Patriz Dela Cruz; Lindsay Clare D.L. Carandang; Ma. Exanii Plantig; Marc Edsel C. Ayes; Maria Rosario Singh-Vergeire; Maria Sofia L. Yangzon; Marielle M. Gamboa; Marissa Alejandria; Niña Francesca Bustamante; Razel Nikka M. Hao; Renato Jacinto Q. Mantaring; Rianna Patricia S. Cruz; Shiela Mae M. Araiza; Yvonne Valerie Austria; Zipporah Mariebelle R. Enriquez; Zyrel V. Mollejon                                                                       |
| EPI_ISL_5195385, EPI_ISL_5524611, EPI_ISL_5524620                                                                                                                                                                                                                                                                                                                                                                                                                                                                                                                                                                                                                                                                                                                                                                                                                                                                                                                                                                                                                                                                              | Paarl Hospital wc PAH                                                                                               | NHLS/UCT                                                                                                                       | Arash Iranzadeh; Bruna Galvao; Carolyn Williamson; Deelan Doolabh; Diana Hardie; Gert Marais; Innocent Mudau; Lynn Tyers; Marvin Hsiao; Rageema Joseph; Stephen Korsman                                                                                                                                                                                                                                                                                                                                                                                                                                                                                                                                                                                                                                                                                                                                                                                                                                       |
| EPI_ISL_2375937, EPI_ISL_2375942, EPI_ISL_2802159, EPI_ISL_2876935                                                                                                                                                                                                                                                                                                                                                                                                                                                                                                                                                                                                                                                                                                                                                                                                                                                                                                                                                                                                                                                             | Pacaltsdorp Clinic wc PAC                                                                                           | NHLS/UCT                                                                                                                       | Arash Iranzadeh; Bruna Galvao; Carolyn Williamson; Deelan Doolabh; Diana Hardie; Gert Marais; Innocent Mudau; Kruger Marais; Lynn Tyers; Marvin Hsiao; Stephen Korsman                                                                                                                                                                                                                                                                                                                                                                                                                                                                                                                                                                                                                                                                                                                                                                                                                                        |
| EPI_ISL_2504114, EPI_ISL_2509334                                                                                                                                                                                                                                                                                                                                                                                                                                                                                                                                                                                                                                                                                                                                                                                                                                                                                                                                                                                                                                                                                               | Palapye Primary Hospital Laboratory                                                                                 | Botswana Harvard HIV Reference Laboratory                                                                                      | Botumelo Zuze; Botshelo Radibe; Dorcas Maruapula; Joseph Makhema; Keoratile Ntshambiwa; Legodile Kooepile; Letsibogo Gaoraalwe; Madisa Mine; Modisa Motswaledi; Mosepele Mosepele; Ontlametse T. Barend; Roger Shapiro; Rohayn Lockman; Sikhulile Moyo; Simani Gaseitsiwe; Thela Tefelo                                                                                                                                                                                                                                                                                                                                                                                                                                                                                                                                                                                                                                                                                                                       |
| EPI_ISL_2484774                                                                                                                                                                                                                                                                                                                                                                                                                                                                                                                                                                                                                                                                                                                                                                                                                                                                                                                                                                                                                                                                                                                | Pamela Youde Nethersole Eastern Hospital                                                                            | Hong Kong Department of Health                                                                                                 | Thongbotho Mphoyakagosi; Wonderful T. Choga<br>Alan K.L. Tsang; Dominic N.C. Tsang; Edman T.K. Lam; Gannon C.K. Mak; Ken H.L. Ng; Peter C.W. Yip; Peter K.C. Cheng; Rickjason C.W. Chan                                                                                                                                                                                                                                                                                                                                                                                                                                                                                                                                                                                                                                                                                                                                                                                                                       |
| EPI_ISL_2631347, EPI_ISL_5438548                                                                                                                                                                                                                                                                                                                                                                                                                                                                                                                                                                                                                                                                                                                                                                                                                                                                                                                                                                                                                                                                                               | Pandemic Response Lab - NYC                                                                                         | Pandemic Response Lab, R&D                                                                                                     | Alex Carpio; Cybill del Castillo; Dylan Law; Haiping Hao; Henry Lee; Isabel Fernandez Escapa; Jon Laurent; Katharine Nelson; Melissa Hopkins; Michael Hammerling; Pradeep Bugga; Shinyoung Clair Kang; Sol Rey; William Ward                                                                                                                                                                                                                                                                                                                                                                                                                                                                                                                                                                                                                                                                                                                                                                                  |
| EPI_ISL_5537900, EPI_ISL_5538657, EPI_ISL_5556286                                                                                                                                                                                                                                                                                                                                                                                                                                                                                                                                                                                                                                                                                                                                                                                                                                                                                                                                                                                                                                                                              | Parkway Medical And Diagnostic Center                                                                               | Philippine Genome Center                                                                                                       | Alethea R. de Guzman; Alyssa Joyce E. Telles; Anna Ong-Lim; Arianne A. Zamora; Benedict A. Maralit; Carlo M. Lapid; Celia Carlos; Cynthia P. Saloma; Devon Ray Pacial; Diomedes A. Cariño; Edsel Maurice Salvana; El King D. Morado; Elcid Aaron R. Pangilinan; Eva Maria Cutiongo-de la Paz; Francis A. Tablizo; Henrietta Marie Rodriguez; Jaime C. Montoya; Jan Michael C. Yap; Jarvin E. Nipales; Jo-Hannah S. Llames; John Q. Wong; Joshua Gregor A. Dizon; Juan Antonio R. Magalang; Karol Sophia Agape R. Padilla; Kenneth M. Kim; Kris P. Punayan; Kristina Patriz Dela Cruz; Lindsay Clare D.L. Carandang; Ma. Exanii Plantig; Marc Edsel C. Ayes; Maria Rosario Singh-Vergeire; Maria Sofia L. Yangzon; Marielle M. Gamboa; Marissa Alejandria; Niña Francesca Bustamante; Razel Nikka M. Hao; Renato Jacinto Q. Mantaring; Rianna Patricia S. Cruz; Shiela Mae M. Araiza; Yvonne Valerie Austria; Zipporah Mariebelle R. Enriquez; Zyrel V. Mollejon                                               |
| EPI_ISL_2860001, EPI_ISL_4714700, EPI_ISL_4714879                                                                                                                                                                                                                                                                                                                                                                                                                                                                                                                                                                                                                                                                                                                                                                                                                                                                                                                                                                                                                                                                              | Parkway Medical and Diagnostic Center                                                                               | Philippine Genome Center                                                                                                       | Alethea R. de Guzman; Anna Ong-Lim; Arianne A. Zamora; Benedict A. Maralit; Carlo M. Lapid; Celia Carlos; Cynthia P. Saloma; Devon Ray Pacial; Diomedes A. Carino; Diomedes A. Cariño; Edsel Maurice Salvana; Edsel Maurice Salvaña; El King D. Morado; Elcid Aaron R. Pangilinan; Eva Maria Cutiongo-de la Paz; Francis A. Tablizo; Henrietta Marie Rodriguez; Jaime C. Montoya; Jan Michael C. Yap; Jarvin E. Nipales; Jo-Hannah S. Llames; John Q. Wong; Joshua Jose Endozo; Juan Antonio R. Magalang; Karol Sophia Agape R. Padilla; Kenneth M. Kim; Kris P. Punayan; Kristina Patriz Dela Cruz; Lindsay Claire D.L. Carandang; Lindsay Clare D.L. Carandang; Ma. Exanii Plantig; Marc Edsel C. Ayes; Maria Rosario Singh-Vergeire; Maria Sofia L. Yangzon; Marielle M. Gamboa; Marissa Alejandria; Niña Francesca Bustamante; Razel Nikka M. Hao; Renato Jacinto Q. Mantaring; Rianna Patricia S. Cruz; Shiela Mae M. Araiza; Yvonne Valerie Austria; Zipporah Mariebelle R. Enriquez; Zyrel V. Mollejon |
| EPI_ISL_2802115                                                                                                                                                                                                                                                                                                                                                                                                                                                                                                                                                                                                                                                                                                                                                                                                                                                                                                                                                                                                                                                                                                                | Parow                                                                                                               | NHLS/UCT                                                                                                                       | Arash Iranzadeh; Bruna Galvao; Carolyn Williamson; Deelan Doolabh; Diana Hardie; Gert Marais; Innocent Mudau; Lynn Tyers; Marvin Hsiao; Stephen Korsman                                                                                                                                                                                                                                                                                                                                                                                                                                                                                                                                                                                                                                                                                                                                                                                                                                                       |
| EPI_ISL_4713009, EPI_ISL_4713021, EPI_ISL_4713027, EPI_ISL_4713044, EPI_ISL_4713077, EPI_ISL_4713107, EPI_ISL_4713146, EPI_ISL_4713179, EPI_ISL_4713193, EPI_ISL_4713210, EPI_ISL_4713216, EPI_ISL_4713255, EPI_ISL_4713290, EPI_ISL_4713338, EPI_ISL_4713292, EPI_ISL_4713338, EPI_ISL_4713380, EPI_ISL_4713395, EPI_ISL_4713448, EPI_ISL_4713455, EPI_ISL_4713523, EPI_ISL_4713539, EPI_ISL_4713541, EPI_ISL_4713561, EPI_ISL_4713601, EPI_ISL_4713656, EPI_ISL_4713668, EPI_ISL_4714338, EPI_ISL_4714527, EPI_ISL_4741546, EPI_ISL_4741574, EPI_ISL_4741577, EPI_ISL_4741583, EPI_ISL_4741599, EPI_ISL_4742167, EPI_ISL_4742169, EPI_ISL_5540270, EPI_ISL_5540426, EPI_ISL_5540434, EPI_ISL_5540548, EPI_ISL_5542870, EPI_ISL_5543250, EPI_ISL_5556376, EPI_ISL_5562479, EPI_ISL_5563447, EPI_ISL_5568994, EPI_ISL_5569119, EPI_ISL_5569212, EPI_ISL_5569344, EPI_ISL_5569375, EPI_ISL_5569690, EPI_ISL_5569417, EPI_ISL_5569525, EPI_ISL_5569690, EPI_ISL_5569161, EPI_ISL_5570161, EPI_ISL_5570499, EPI_ISL_5570530, EPI_ISL_5570597, EPI_ISL_5570644, EPI_ISL_5570738, EPI_ISL_5570745, EPI_ISL_5570804, EPI_ISL_5570863 | see above<br>Pasig City Children's Hospital - Child's Hope                                                          | Philippine Genome Center                                                                                                       | Alethea R. de Guzman; Alyssa Joyce E. Telles; Anna Ong-Lim; Arianne A. Zamora; Benedict A. Maralit; Carlo M. Lapid; Celia Carlos; Cynthia P. Saloma; Devon Ray Pacial; Diomedes A. Cariño; Edsel Maurice Salvana; El King D. Morado; Elcid Aaron R. Pangilinan; Eva Maria Cutiongo-de la Paz; Francis A. Tablizo; Henrietta Marie Rodriguez; Jaime C. Montoya; Jan Michael C. Yap; Jarvin E. Nipales; Jo-Hannah S. Llames; John Q. Wong; Joshua Jose Endozo; Juan Antonio R. Magalang; Karol Sophia Agape R. Padilla; Kenneth M. Kim; Kris P. Punayan; Kristina Patriz Dela Cruz; Lindsay Clare D.L. Carandang; Ma. Exanii Plantig; Marc Edsel C. Ayes; Maria Rosario Singh-Vergeire; Maria Sofia L. Yangzon; Marielle M. Gamboa; Marissa Alejandria; Niña Francesca Bustamante; Razel Nikka M. Hao; Renato Jacinto Q. Mantaring; Rianna Patricia S. Cruz; Shiela Mae M. Araiza; Yvonne Valerie Austria; Zipporah Mariebelle R. Enriquez; Zyrel V. Mollejon                                                   |
| EPI_ISL_2811871, EPI_ISL_2811873                                                                                                                                                                                                                                                                                                                                                                                                                                                                                                                                                                                                                                                                                                                                                                                                                                                                                                                                                                                                                                                                                               | Pasir Mas Town Health Clinic                                                                                        | Institute for Medical Research, Infectious Disease Research Centre, National Institutes of Health, Ministry of Health Malaysia | Azizan MA; Kamel K; Mohd Zawawi Z; Ramly N; Robert F; Suppiah J; Thayyan R                                                                                                                                                                                                                                                                                                                                                                                                                                                                                                                                                                                                                                                                                                                                                                                                                                                                                                                                    |
| EPI_ISL_2695811, EPI_ISL_2695812, EPI_ISL_2695813, EPI_ISL_2695814, EPI_ISL_2695816, EPI_ISL_2695824, EPI_ISL_2695826, EPI_ISL_2695827, EPI_ISL_2695830, EPI_ISL_2695831, EPI_ISL_2695832, EPI_ISL_2695833, EPI_ISL_2695838, EPI_ISL_2695839, EPI_ISL_2695840, EPI_ISL_2695848, EPI_ISL_2876338, EPI_ISL_2876385, EPI_ISL_3032532                                                                                                                                                                                                                                                                                                                                                                                                                                                                                                                                                                                                                                                                                                                                                                                              | see above<br>PathCare, Cape Town                                                                                    | Division of Medical Virology, National Health Laboratory Service (NHLS), Tygerberg Hospital / Stellenbosch University          | Bronwyn Kleinhans; Gert van Zyl; Jean Maritz; Kamela Mahlakwane; Petra Raimond; San Emmanuel James; Susan Engelbrecht; Tania Stander; Tongai Maponga; Tulo de Oliveira; Wolfgang Preiser                                                                                                                                                                                                                                                                                                                                                                                                                                                                                                                                                                                                                                                                                                                                                                                                                      |
| EPI_ISL_3220302                                                                                                                                                                                                                                                                                                                                                                                                                                                                                                                                                                                                                                                                                                                                                                                                                                                                                                                                                                                                                                                                                                                | PathWest Laboratory Medicine WA                                                                                     | PathWest Laboratory Medicine WA Microbial Surveillance Unit                                                                    | PathWest Laboratory Medicine WA Microbial Surveillance Unit                                                                                                                                                                                                                                                                                                                                                                                                                                                                                                                                                                                                                                                                                                                                                                                                                                                                                                                                                   |
| EPI_ISL_3717999                                                                                                                                                                                                                                                                                                                                                                                                                                                                                                                                                                                                                                                                                                                                                                                                                                                                                                                                                                                                                                                                                                                | Pathcare                                                                                                            | National Institute for Communicable Diseases of the National Health Laboratory Service                                         | Amoako DG; Bhiman JN; Everatt J; Ismail A; Mahlangu B; Mnguni A; Mohale T; Ntuli N; Scheepers C; Sisonke Team                                                                                                                                                                                                                                                                                                                                                                                                                                                                                                                                                                                                                                                                                                                                                                                                                                                                                                 |
| EPI_ISL_2828741, EPI_ISL_2828746                                                                                                                                                                                                                                                                                                                                                                                                                                                                                                                                                                                                                                                                                                                                                                                                                                                                                                                                                                                                                                                                                               | Pathcare Vaal                                                                                                       | National Institute for Communicable Diseases of the National Health Laboratory Service                                         | Amoako DG; Bhiman JN; Everatt J; Ismail A; Mahlangu B; Mnguni A; Mohale T; Ntuli N; Scheepers C                                                                                                                                                                                                                                                                                                                                                                                                                                                                                                                                                                                                                                                                                                                                                                                                                                                                                                               |
| EPI_ISL_3207489,                                                                                                                                                                                                                                                                                                                                                                                                                                                                                                                                                                                                                                                                                                                                                                                                                                                                                                                                                                                                                                                                                                               | Pathcare lab                                                                                                        | NHLS/UCT                                                                                                                       | Arash Iranzadeh; Bruna Galvao; Carolyn Williamson; Deelan Doolabh; Diana Hardie; Gert Marais; Innocent Mudau; Lynn Tyers; Marvin Hsiao; Rageema Joseph; Sisonke; Stephen Korsman                                                                                                                                                                                                                                                                                                                                                                                                                                                                                                                                                                                                                                                                                                                                                                                                                              |



|                                                                                                                                                                                                                                                                                                                                                                                                                                                                                                                                                                                                                                                                                                                                                                                                                                                                                                                                                                                                                                                                                                                                                                                                                                                                                                                                                                                                                                                                                                                                                                                                                                                                                                                                                                                                                                                                                                                                                                                                                                                                                                                                                                                                                                                                                                                                                                                       |                                                                     |                                                                                                                                |                                                                                                                                                                                                                                                                                                                                                                                                                                                                                                                                                                                                                                                                                                                                                                                                                                                                                                                                                                                                                                                                                                                                                                                      |                                                                                                                                                                                                                 |  |
|---------------------------------------------------------------------------------------------------------------------------------------------------------------------------------------------------------------------------------------------------------------------------------------------------------------------------------------------------------------------------------------------------------------------------------------------------------------------------------------------------------------------------------------------------------------------------------------------------------------------------------------------------------------------------------------------------------------------------------------------------------------------------------------------------------------------------------------------------------------------------------------------------------------------------------------------------------------------------------------------------------------------------------------------------------------------------------------------------------------------------------------------------------------------------------------------------------------------------------------------------------------------------------------------------------------------------------------------------------------------------------------------------------------------------------------------------------------------------------------------------------------------------------------------------------------------------------------------------------------------------------------------------------------------------------------------------------------------------------------------------------------------------------------------------------------------------------------------------------------------------------------------------------------------------------------------------------------------------------------------------------------------------------------------------------------------------------------------------------------------------------------------------------------------------------------------------------------------------------------------------------------------------------------------------------------------------------------------------------------------------------------|---------------------------------------------------------------------|--------------------------------------------------------------------------------------------------------------------------------|--------------------------------------------------------------------------------------------------------------------------------------------------------------------------------------------------------------------------------------------------------------------------------------------------------------------------------------------------------------------------------------------------------------------------------------------------------------------------------------------------------------------------------------------------------------------------------------------------------------------------------------------------------------------------------------------------------------------------------------------------------------------------------------------------------------------------------------------------------------------------------------------------------------------------------------------------------------------------------------------------------------------------------------------------------------------------------------------------------------------------------------------------------------------------------------|-----------------------------------------------------------------------------------------------------------------------------------------------------------------------------------------------------------------|--|
| EPI_ISL_3207491, EPI_ISL_3207492, EPI_ISL_3207494, EPI_ISL_3207497, EPI_ISL_3207498                                                                                                                                                                                                                                                                                                                                                                                                                                                                                                                                                                                                                                                                                                                                                                                                                                                                                                                                                                                                                                                                                                                                                                                                                                                                                                                                                                                                                                                                                                                                                                                                                                                                                                                                                                                                                                                                                                                                                                                                                                                                                                                                                                                                                                                                                                   |                                                                     |                                                                                                                                |                                                                                                                                                                                                                                                                                                                                                                                                                                                                                                                                                                                                                                                                                                                                                                                                                                                                                                                                                                                                                                                                                                                                                                                      |                                                                                                                                                                                                                 |  |
| EPI_ISL_5510288, EPI_ISL_5510289, EPI_ISL_5510290, EPI_ISL_5510291, EPI_ISL_5510464                                                                                                                                                                                                                                                                                                                                                                                                                                                                                                                                                                                                                                                                                                                                                                                                                                                                                                                                                                                                                                                                                                                                                                                                                                                                                                                                                                                                                                                                                                                                                                                                                                                                                                                                                                                                                                                                                                                                                                                                                                                                                                                                                                                                                                                                                                   | Pathcare/Vermaak Centurion                                          | National Institute for Communicable Diseases of the National Health Laboratory Service                                         |                                                                                                                                                                                                                                                                                                                                                                                                                                                                                                                                                                                                                                                                                                                                                                                                                                                                                                                                                                                                                                                                                                                                                                                      | Amoako DG; Bhiman JN; Everatt J; Ismail A; Mahlangu B; Mnguni A; Mohale T; Ntuli N; Scheepers C                                                                                                                 |  |
| EPI_ISL_3888452                                                                                                                                                                                                                                                                                                                                                                                                                                                                                                                                                                                                                                                                                                                                                                                                                                                                                                                                                                                                                                                                                                                                                                                                                                                                                                                                                                                                                                                                                                                                                                                                                                                                                                                                                                                                                                                                                                                                                                                                                                                                                                                                                                                                                                                                                                                                                                       | Pathogen Genomics Center, National Institute of Infectious Diseases | Pathogen Genomics Center, National Institute of Infectious Diseases                                                            |                                                                                                                                                                                                                                                                                                                                                                                                                                                                                                                                                                                                                                                                                                                                                                                                                                                                                                                                                                                                                                                                                                                                                                                      | Kentaro Itokawa; Makoto Kuroda; Masanori Hashino; Rina Tanaka; Tsuyoshi Sekizuka                                                                                                                                |  |
| EPI_ISL_2993437                                                                                                                                                                                                                                                                                                                                                                                                                                                                                                                                                                                                                                                                                                                                                                                                                                                                                                                                                                                                                                                                                                                                                                                                                                                                                                                                                                                                                                                                                                                                                                                                                                                                                                                                                                                                                                                                                                                                                                                                                                                                                                                                                                                                                                                                                                                                                                       | Pathology, UAB                                                      | Pathology, UAB                                                                                                                 |                                                                                                                                                                                                                                                                                                                                                                                                                                                                                                                                                                                                                                                                                                                                                                                                                                                                                                                                                                                                                                                                                                                                                                                      | E.J.; Hendrickson; Heredia, J.; Leal; Lefkowitz; Moates, D.; R.C.; S.M.                                                                                                                                         |  |
| EPI_ISL_4558237, EPI_ISL_4558238                                                                                                                                                                                                                                                                                                                                                                                                                                                                                                                                                                                                                                                                                                                                                                                                                                                                                                                                                                                                                                                                                                                                                                                                                                                                                                                                                                                                                                                                                                                                                                                                                                                                                                                                                                                                                                                                                                                                                                                                                                                                                                                                                                                                                                                                                                                                                      | Pejabat Kesihatan Daerah Kota Marudu                                | Malaysia Genome Institute                                                                                                      |                                                                                                                                                                                                                                                                                                                                                                                                                                                                                                                                                                                                                                                                                                                                                                                                                                                                                                                                                                                                                                                                                                                                                                                      | Azrin Ahmad; Enizza Kasim; Irni Suhayu Sapian; Mohd Faizal Abu Bakar; Mohd Ghows Mohd Azam.; Mohd Noor Mat Isa; Nor Azfa Johari; Nurhezreen Md Iqbal; Shamsidar Sopie; Siti Noraini Othman; Yusuf Muhammad Noor |  |
| EPI_ISL_2649998, EPI_ISL_2649999                                                                                                                                                                                                                                                                                                                                                                                                                                                                                                                                                                                                                                                                                                                                                                                                                                                                                                                                                                                                                                                                                                                                                                                                                                                                                                                                                                                                                                                                                                                                                                                                                                                                                                                                                                                                                                                                                                                                                                                                                                                                                                                                                                                                                                                                                                                                                      | Penang General Hospital                                             | Institute for Medical Research, Infectious Disease Research Centre, National Institutes of Health, Ministry of Health Malaysia |                                                                                                                                                                                                                                                                                                                                                                                                                                                                                                                                                                                                                                                                                                                                                                                                                                                                                                                                                                                                                                                                                                                                                                                      | Azizan MA; Kamel K; Mohd Zawawi Z; Ramly N; Robert F; Suppiah J; Thayvan R                                                                                                                                      |  |
| EPI_ISL_2484791, EPI_ISL_2484797                                                                                                                                                                                                                                                                                                                                                                                                                                                                                                                                                                                                                                                                                                                                                                                                                                                                                                                                                                                                                                                                                                                                                                                                                                                                                                                                                                                                                                                                                                                                                                                                                                                                                                                                                                                                                                                                                                                                                                                                                                                                                                                                                                                                                                                                                                                                                      | Penny's Bay Quarantine Centre                                       | Hong Kong Department of Health                                                                                                 |                                                                                                                                                                                                                                                                                                                                                                                                                                                                                                                                                                                                                                                                                                                                                                                                                                                                                                                                                                                                                                                                                                                                                                                      | Alan K.L. Tsang; Dominic N.C. Tsang; Edman T.K. Lam; Gannon C.K. Mak; Ken H.L. Ng; Peter C.W. Yip; Peter K.C. Cheng; Rickjason C.W. Chan                                                                        |  |
| EPI_ISL_3247358, EPI_ISL_3247403                                                                                                                                                                                                                                                                                                                                                                                                                                                                                                                                                                                                                                                                                                                                                                                                                                                                                                                                                                                                                                                                                                                                                                                                                                                                                                                                                                                                                                                                                                                                                                                                                                                                                                                                                                                                                                                                                                                                                                                                                                                                                                                                                                                                                                                                                                                                                      | Perak State Health Department                                       | Institute for Medical Research, Infectious Disease Research Centre, National Institutes of Health, Ministry of Health Malaysia |                                                                                                                                                                                                                                                                                                                                                                                                                                                                                                                                                                                                                                                                                                                                                                                                                                                                                                                                                                                                                                                                                                                                                                                      | Anasir Mi; Azizan MA; Kamel K; Mohd Zawawi Z; Ramly N; Robert F; Suppiah J; Thayvan R                                                                                                                           |  |
| EPI_ISL_3800206, EPI_ISL_3800565, EPI_ISL_3800654, EPI_ISL_3800656, EPI_ISL_3800657, EPI_ISL_3800658                                                                                                                                                                                                                                                                                                                                                                                                                                                                                                                                                                                                                                                                                                                                                                                                                                                                                                                                                                                                                                                                                                                                                                                                                                                                                                                                                                                                                                                                                                                                                                                                                                                                                                                                                                                                                                                                                                                                                                                                                                                                                                                                                                                                                                                                                  | Pfizer, Inc                                                         | Pfizer, Inc                                                                                                                    |                                                                                                                                                                                                                                                                                                                                                                                                                                                                                                                                                                                                                                                                                                                                                                                                                                                                                                                                                                                                                                                                                                                                                                                      | Huiqing Si; Kena Swanson and the C4591001 study team; Kwok Lee; Paul Liberator; Qi Yang; Zhenghui Li                                                                                                            |  |
| EPI_ISL_5101090                                                                                                                                                                                                                                                                                                                                                                                                                                                                                                                                                                                                                                                                                                                                                                                                                                                                                                                                                                                                                                                                                                                                                                                                                                                                                                                                                                                                                                                                                                                                                                                                                                                                                                                                                                                                                                                                                                                                                                                                                                                                                                                                                                                                                                                                                                                                                                       | Pharmgenetix GmbH                                                   | Pharmgenetix GmbH                                                                                                              |                                                                                                                                                                                                                                                                                                                                                                                                                                                                                                                                                                                                                                                                                                                                                                                                                                                                                                                                                                                                                                                                                                                                                                                      | A. Matulevicius; B. Avdiu; C. Nofziger; G. Scantamburlo; S. Vanoni                                                                                                                                              |  |
| EPI_ISL_3354934                                                                                                                                                                                                                                                                                                                                                                                                                                                                                                                                                                                                                                                                                                                                                                                                                                                                                                                                                                                                                                                                                                                                                                                                                                                                                                                                                                                                                                                                                                                                                                                                                                                                                                                                                                                                                                                                                                                                                                                                                                                                                                                                                                                                                                                                                                                                                                       | Philadelphia Department of Public Health                            | Centers for Disease Control and Prevention Division of Viral Diseases, Pathogen Discovery                                      | Alex Burgin; Ben Rambo-Martin; Clinton Paden; Dakota Howard; Dave Wentworth; Dhvani Batra; Jasmine Padilla; Justin Lee; Krista Queen; Kristen Knipe; Kristine Lacey; Mark Burroughs; Matthew Schmerer; Meghan Bentz; Mill Sheth; Peter Cook; Sam Shepari; Sarah Nobles; Suxiang Tong; Vivien Duen; Yvette Unoarumhi                                                                                                                                                                                                                                                                                                                                                                                                                                                                                                                                                                                                                                                                                                                                                                                                                                                                  |                                                                                                                                                                                                                 |  |
| EPI_ISL_2859303, EPI_ISL_2859316, EPI_ISL_2859320, EPI_ISL_2859329, EPI_ISL_2859337, EPI_ISL_2859338, EPI_ISL_2859342, EPI_ISL_2859354, EPI_ISL_2859360, EPI_ISL_2860036, EPI_ISL_2860045, EPI_ISL_4715244, EPI_ISL_4716632, EPI_ISL_4717276, EPI_ISL_4741910, EPI_ISL_4741919, EPI_ISL_4741929, EPI_ISL_4741930, EPI_ISL_4741932, EPI_ISL_4741936, EPI_ISL_4741937, EPI_ISL_4741940, EPI_ISL_4741946, EPI_ISL_4741954, EPI_ISL_4742085, EPI_ISL_4742219, EPI_ISL_4742331, EPI_ISL_4742332, EPI_ISL_4742341, EPI_ISL_4742342, EPI_ISL_4742345, EPI_ISL_4742346, EPI_ISL_4742347, EPI_ISL_5541475, EPI_ISL_5542678, EPI_ISL_5542713, EPI_ISL_5542754, EPI_ISL_5542843, EPI_ISL_5542848, EPI_ISL_5542954, EPI_ISL_5542955, EPI_ISL_5562515, EPI_ISL_5562789, EPI_ISL_5563078, EPI_ISL_5563324, EPI_ISL_5563852, EPI_ISL_5569025, EPI_ISL_5569126, EPI_ISL_5569169, EPI_ISL_5569627, EPI_ISL_5569997, EPI_ISL_5570008, EPI_ISL_5570008, EPI_ISL_5570153, EPI_ISL_5570202, EPI_ISL_5570446, EPI_ISL_5570491, EPI_ISL_5570567, EPI_ISL_5570637, EPI_ISL_5570667, EPI_ISL_5570730, EPI_ISL_5570737                                                                                                                                                                                                                                                                                                                                                                                                                                                                                                                                                                                                                                                                                                                                                                                                                                                                                                                                                                                                                                                                                                                                                                                                                                                                                          | Philippine General Hospital (PGH)                                   | Philippine Genome Center                                                                                                       | Alethea R. de Guzman; Alyssa Joyce E. Telles; Anna Ong-Lim; Arianne A. Zamora; Benedict A. Maralit; Carlo M. Lapid; Celia Carlos; Cynthia P. Saloma; Devon Ray Pacial; Diomedes A. Carino; Diomedes A. Cariño; Edsel Maurice Salvana; Edsel Maurice Salvaña; El King D. Morado; Elcid Aaron R. Pangilinan; Eva Maria Cutiongco-de la Paz; Francis A. Tablizo; Henrietta Marie Rodriguez; Jaime C. Montoya; Jan Michael C. Yap; Jarvin E. Nipales; Jo-Hannah S. Llamas; John Michael Egana; John Q. Wong; Joshua Gregor A. Dizon; Joshua Jose Endozo; Juan Antonio R. Magalang; Karol Sophia Agape R. Padilla; Kenneth M. Kim; Kris P. Punayan; Kristina Patriz Dela Cruz; Kristina Patriz Dela Cruz; Lindsay Claire D.L. Carandang; Lindsay Clare D.L. Carandang; Ma. Exanil Plantig; Marc Edsel C. Ayes; Maria Rosario Singh-Vergeire; Maria Rosario Singh-Vergeire and Cynthia P. Saloma; Maria Sofia L. Yangzon; Marielle M Gamboa; Marielle M. Gamboa; Marissa Alejandria; Nina Francesca Bustamante; Razel Nikka M. Hao; Renato Jacinto Q. Mantaring; Rianna Patricia S. Cruz; Sheila Mae M. Araiza; Yvonne Valerie Austria; Zipporah Mariebelle R. Enriquez; Zyrel V. Mollejon |                                                                                                                                                                                                                 |  |
| EPI_ISL_4716551, EPI_ISL_4717128, EPI_ISL_5570060, EPI_ISL_5570469                                                                                                                                                                                                                                                                                                                                                                                                                                                                                                                                                                                                                                                                                                                                                                                                                                                                                                                                                                                                                                                                                                                                                                                                                                                                                                                                                                                                                                                                                                                                                                                                                                                                                                                                                                                                                                                                                                                                                                                                                                                                                                                                                                                                                                                                                                                    | Philippine National Police Crime Laboratory (PNP Crime Lab.)        | Philippine Genome Center                                                                                                       | Alethea R. de Guzman; Alyssa Joyce E. Telles; Anna Ong-Lim; Arianne A. Zamora; Benedict A. Maralit; Carlo M. Lapid; Celia Carlos; Cynthia P. Saloma; Devon Ray Pacial; Diomedes A. Carino; Diomedes A. Cariño; Edsel Maurice Salvana; El King D. Morado; Elcid Aaron R. Pangilinan; Eva Maria Cutiongco-de la Paz; Francis A. Tablizo; Henrietta Marie Rodriguez; Jaime C. Montoya; Jan Michael C. Yap; Jarvin E. Nipales; Jo-Hannah S. Llamas; John Michael Egana; John Q. Wong; Joshua Gregor A. Dizon; Joshua Jose Endozo; Juan Antonio R. Magalang; Karol Sophia Agape R. Padilla; Kenneth M. Kim; Kris P. Punayan; Kristina Patriz Dela Cruz; Lindsay Clare D.L. Carandang; Ma. Exanil Plantig; Marc Edsel C. Ayes; Maria Rosario Singh-Vergeire; Maria Sofia L. Yangzon; Marielle M Gamboa; Marielle M. Gamboa; Marissa Alejandria; Nina Francesca Bustamante; Razel Nikka M. Hao; Renato Jacinto Q. Mantaring; Rianna Patricia S. Cruz; Sheila Mae M. Araiza; Yvonne Valerie Austria; Zipporah Mariebelle R. Enriquez; Zyrel V. Mollejon                                                                                                                                      |                                                                                                                                                                                                                 |  |
| EPI_ISL_2859965, EPI_ISL_2860018, EPI_ISL_2860038, EPI_ISL_4717361, EPI_ISL_5544051, EPI_ISL_5544073, EPI_ISL_5544074, EPI_ISL_5544121                                                                                                                                                                                                                                                                                                                                                                                                                                                                                                                                                                                                                                                                                                                                                                                                                                                                                                                                                                                                                                                                                                                                                                                                                                                                                                                                                                                                                                                                                                                                                                                                                                                                                                                                                                                                                                                                                                                                                                                                                                                                                                                                                                                                                                                | Philippine Red Cross - Clark Molecular Laboratory                   | Philippine Genome Center                                                                                                       | Alethea R. de Guzman; Anna Ong-Lim; Arianne A. Zamora; Benedict A. Maralit; Carlo M. Lapid; Celia Carlos; Cynthia P. Saloma; Devon Ray Pacial; Diomedes A. Carino; Diomedes A. Cariño; Edsel Maurice Salvana; Edsel Maurice Salvaña; El King D. Morado; Elcid Aaron R. Pangilinan; Eva Maria Cutiongco-de la Paz; Francis A. Tablizo; Henrietta Marie Rodriguez; Jaime C. Montoya; Jan Michael C. Yap; Jarvin E. Nipales; Jo-Hannah S. Llamas; John Michael Egana; John Q. Wong; Joshua Gregor A. Dizon; Joshua Jose Endozo; Juan Antonio R. Magalang; Karol Sophia Agape R. Padilla; Kenneth M. Kim; Kris P. Punayan; Kristina Patriz Dela Cruz; Lindsay Claire D.L. Carandang; Lindsay Clare D.L. Carandang; Ma. Exanil Plantig; Marc Edsel C. Ayes; Maria Rosario Singh-Vergeire; Maria Rosario Singh-Vergeire and Cynthia P. Saloma; Maria Sofia L. Yangzon; Marielle M Gamboa; Marielle M. Gamboa; Marissa Alejandria; Nina Francesca Bustamante; Razel Nikka M. Hao; Renato Jacinto Q. Mantaring; Rianna Patricia S. Cruz; Sheila Mae M. Araiza; Yvonne Valerie Austria; Zipporah Mariebelle R. Enriquez; Zyrel V. Mollejon                                                    |                                                                                                                                                                                                                 |  |
| EPI_ISL_2859980, EPI_ISL_2860096, EPI_ISL_2860140                                                                                                                                                                                                                                                                                                                                                                                                                                                                                                                                                                                                                                                                                                                                                                                                                                                                                                                                                                                                                                                                                                                                                                                                                                                                                                                                                                                                                                                                                                                                                                                                                                                                                                                                                                                                                                                                                                                                                                                                                                                                                                                                                                                                                                                                                                                                     | Philippine Red Cross - National Blood Center                        | Philippine Genome Center                                                                                                       | Alethea R. de Guzman; Anna Ong-Lim; Arianne A. Zamora; Benedict A. Maralit; Carlo M. Lapid; Celia Carlos; Cynthia P. Saloma; Devon Ray Pacial; Diomedes A. Carino; Diomedes A. Cariño; Edsel Maurice Salvana; El King D. Morado; Elcid Aaron R. Pangilinan; Eva Maria Cutiongco-de la Paz; Francis A. Tablizo; Henrietta Marie Rodriguez; Jaime C. Montoya; Jan Michael C. Yap; Jarvin E. Nipales; Jo-Hannah S. Llamas; John Q. Wong; Joshua Gregor A. Dizon; Juan Antonio R. Magalang; Karol Sophia Agape R. Padilla; Kenneth M. Kim; Kris P. Punayan; Kristina Patriz Dela Cruz; Lindsay Claire D.L. Carandang; Ma. Exanil Plantig; Marc Edsel C. Ayes; Maria Rosario Singh-Vergeire and Cynthia P. Saloma; Maria Sofia L. Yangzon; Marielle M Gamboa; Marissa Alejandria; Nina Francesca Bustamante; Razel Nikka M. Hao; Renato Jacinto Q. Mantaring; Rianna Patricia S. Cruz; Sheila Mae M. Araiza; Yvonne Valerie Austria; Zipporah Mariebelle R. Enriquez; Zyrel V. Mollejon                                                                                                                                                                                                   |                                                                                                                                                                                                                 |  |
| EPI_ISL_2859964, EPI_ISL_2859966, EPI_ISL_2859974, EPI_ISL_2859976, EPI_ISL_2859984, EPI_ISL_2859977, EPI_ISL_2859984, EPI_ISL_2859986, EPI_ISL_2859988, EPI_ISL_2859992, EPI_ISL_2859994, EPI_ISL_2859995, EPI_ISL_2859996, EPI_ISL_2860002, EPI_ISL_2860006, EPI_ISL_2860023, EPI_ISL_2860024, EPI_ISL_2860025, EPI_ISL_2860026, EPI_ISL_2860037, EPI_ISL_2860039, EPI_ISL_2860041, EPI_ISL_2860042, EPI_ISL_2860043, EPI_ISL_2860044, EPI_ISL_2860048, EPI_ISL_2860049, EPI_ISL_2860052, EPI_ISL_2860055, EPI_ISL_2860057, EPI_ISL_2860058, EPI_ISL_2860060, EPI_ISL_2860062, EPI_ISL_2860066, EPI_ISL_2860070, EPI_ISL_2860072, EPI_ISL_2860073, EPI_ISL_2860075, EPI_ISL_2860076, EPI_ISL_2860078, EPI_ISL_2860082, EPI_ISL_2860086, EPI_ISL_2860087, EPI_ISL_2860090, EPI_ISL_2860093, EPI_ISL_2860100, EPI_ISL_2860103, EPI_ISL_2860104, EPI_ISL_2860107, EPI_ISL_2860110, EPI_ISL_2860111, EPI_ISL_2860113, EPI_ISL_2860124, EPI_ISL_2860127, EPI_ISL_2860128, EPI_ISL_2860131, EPI_ISL_2860132, EPI_ISL_2860139, EPI_ISL_2860142, EPI_ISL_2860145, EPI_ISL_2860148, EPI_ISL_2860154, EPI_ISL_2860157, EPI_ISL_2860160, EPI_ISL_2860163, EPI_ISL_2860174, EPI_ISL_2860212, EPI_ISL_2860214, EPI_ISL_4712140, EPI_ISL_4713061, EPI_ISL_4713128, EPI_ISL_4713155, EPI_ISL_4713287, EPI_ISL_4713407, EPI_ISL_4713467, EPI_ISL_4714639, EPI_ISL_4714903, EPI_ISL_4715216, EPI_ISL_4716563, EPI_ISL_4716650, EPI_ISL_4716758, EPI_ISL_4716781, EPI_ISL_4716934, EPI_ISL_4717042, EPI_ISL_4717042, EPI_ISL_4717108, EPI_ISL_4717114, EPI_ISL_4717219, EPI_ISL_4717228, EPI_ISL_4717238, EPI_ISL_4717238, EPI_ISL_4717248, EPI_ISL_4717263, EPI_ISL_4717270, EPI_ISL_4717280, EPI_ISL_4717288, EPI_ISL_4717337, EPI_ISL_5539345, EPI_ISL_5540287, EPI_ISL_5540295, EPI_ISL_5540400, EPI_ISL_5540415, EPI_ISL_5540438, EPI_ISL_5540438, EPI_ISL_5540462, EPI_ISL_5540465, EPI_ISL_5540522, EPI_ISL_5541188, EPI_ISL_5541205, EPI_ISL_5541297, EPI_ISL_5544042, EPI_ISL_5562442, EPI_ISL_5562929, EPI_ISL_5562952, EPI_ISL_5562952, EPI_ISL_5563275, EPI_ISL_5568751, EPI_ISL_5568789, EPI_ISL_5568816, EPI_ISL_5568855, EPI_ISL_5568910, EPI_ISL_5569228, EPI_ISL_5569251, EPI_ISL_5569321, EPI_ISL_5569336, EPI_ISL_5569370, EPI_ISL_5569453, EPI_ISL_5569638, EPI_ISL_5569654, EPI_ISL_5569654, EPI_ISL_5570026, EPI_ISL_5570424, EPI_ISL_5570430, EPI_ISL_5570751, EPI_ISL_5570843 | Philippine Red Cross - Port Area                                    | Philippine Genome Center                                                                                                       | Alethea R. de Guzman; Alyssa Joyce E. Telles; Anna Ong-Lim; Arianne A. Zamora; Benedict A. Maralit; Carlo M. Lapid; Celia Carlos; Cynthia P. Saloma; Devon Ray Pacial; Diomedes A. Carino; Diomedes A. Cariño; Edsel Maurice Salvana; Edsel Maurice Salvaña; El King D. Morado; Elcid Aaron R. Pangilinan; Eva Maria Cutiongco-de la Paz; Francis A. Tablizo; Henrietta Marie Rodriguez; Jaime C. Montoya; Jan Michael C. Yap; Jarvin E. Nipales; Jo-Hannah S. Llamas; John Michael Egana; John Q. Wong; Joshua Gregor A. Dizon; Joshua Jose Endozo; Juan Antonio R. Magalang; Karol Sophia Agape R. Padilla; Kenneth M. Kim; Kris P. Punayan; Kristina Patriz Dela Cruz; Kristina Patriz Dela Cruz; Lindsay Claire D.L. Carandang; Lindsay Clare D.L. Carandang; Ma. Exanil Plantig; Marc Edsel C. Ayes; Maria Rosario Singh-Vergeire; Maria Rosario Singh-Vergeire and Cynthia P. Saloma; Maria Sofia L. Yangzon; Marielle M Gamboa; Marielle M. Gamboa; Marissa Alejandria; Nina Francesca Bustamante; Razel Nikka M. Hao; Renato Jacinto Q. Mantaring; Rianna Patricia S. Cruz; Sheila Mae M. Araiza; Yvonne Valerie Austria; Zipporah Mariebelle R. Enriquez; Zyrel V. Mollejon |                                                                                                                                                                                                                 |  |
| EPI_ISL_4713223, EPI_ISL_4713249, EPI_ISL_4713394, EPI_ISL_4713479, EPI_ISL_4713484, EPI_ISL_4713574, EPI_ISL_4713741, EPI_ISL_4714751, EPI_ISL_4714816, EPI_ISL_4714852, EPI_ISL_4715159, EPI_ISL_4715276, EPI_ISL_4741489, EPI_ISL_4741561, EPI_ISL_4741565, EPI_ISL_4742231, EPI_ISL_5537910, EPI_ISL_5540346, EPI_ISL_5540456, EPI_ISL_5543268, EPI_ISL_5544022, EPI_ISL_5544032, EPI_ISL_5544109, EPI_ISL_5563001, EPI_ISL_5563212, EPI_ISL_5568847, EPI_ISL_5570285, EPI_ISL_5570692, EPI_ISL_5570849                                                                                                                                                                                                                                                                                                                                                                                                                                                                                                                                                                                                                                                                                                                                                                                                                                                                                                                                                                                                                                                                                                                                                                                                                                                                                                                                                                                                                                                                                                                                                                                                                                                                                                                                                                                                                                                                           | Philippine Red Cross - Subic Molecular Laboratory                   | Philippine Genome Center                                                                                                       | Alethea R. de Guzman; Alyssa Joyce E. Telles; Anna Ong-Lim; Arianne A. Zamora; Benedict A. Maralit; Carlo M. Lapid; Celia Carlos; Cynthia P. Saloma; Devon Ray Pacial; Diomedes A. Carino; Diomedes A. Cariño; Edsel Maurice Salvana; El King D. Morado; Elcid Aaron R. Pangilinan; Eva Maria Cutiongco-de la Paz; Francis A. Tablizo; Henrietta Marie Rodriguez; Jaime C. Montoya; Jan Michael C. Yap; Jarvin E. Nipales; Jo-Hannah S. Llamas; John Michael Egana; John Q. Wong; Joshua Gregor A. Dizon; Joshua Jose Endozo; Juan Antonio R. Magalang; Karol Sophia Agape R. Padilla; Kenneth M. Kim; Kris P. Punayan; Kristina Patriz Dela Cruz; Kristina Patriz Dela Cruz; Lindsay Claire D.L. Carandang; Lindsay Clare D.L. Carandang; Ma. Exanil Plantig; Marc Edsel C. Ayes; Maria Rosario Singh-Vergeire; Maria Sofia L. Yangzon; Marielle M Gamboa; Marielle M. Gamboa; Marissa Alejandria; Nina Francesca Bustamante; Razel Nikka M. Hao; Renato Jacinto Q. Mantaring; Rianna Patricia S. Cruz; Sheila Mae M. Araiza; Yvonne Valerie Austria; Zipporah Mariebelle R. Enriquez; Zyrel V. Mollejon                                                                            |                                                                                                                                                                                                                 |  |
| EPI_ISL_2859312, EPI_ISL_2859318, EPI_ISL_2859325, EPI_ISL_2859332, EPI_ISL_2859353, EPI_ISL_2859361, EPI_ISL_2859365, EPI_ISL_2859370, EPI_ISL_4715184, EPI_ISL_4741448, EPI_ISL_4741513, EPI_ISL_4741519, EPI_ISL_4741566, EPI_ISL_4741569, EPI_ISL_4741588, EPI_ISL_4741596, EPI_ISL_5537993, EPI_ISL_5538351, EPI_ISL_5540271, EPI_ISL_5540419, EPI_ISL_5540423, EPI_ISL_5540469, EPI_ISL_5547407, EPI_ISL_5547549, EPI_ISL_5547918, EPI_ISL_5552594, EPI_ISL_5562341, EPI_ISL_5562487, EPI_ISL_5563159, EPI_ISL_5569280, EPI_ISL_5570658                                                                                                                                                                                                                                                                                                                                                                                                                                                                                                                                                                                                                                                                                                                                                                                                                                                                                                                                                                                                                                                                                                                                                                                                                                                                                                                                                                                                                                                                                                                                                                                                                                                                                                                                                                                                                                         | Philippine Red Cross - Zamboanga Molecular Laboratory               | Philippine Genome Center                                                                                                       | Alethea R. de Guzman; Alyssa Joyce E. Telles; Anna Ong-Lim; Arianne A. Zamora; Benedict A. Maralit; Carlo M. Lapid; Celia Carlos; Cynthia P. Saloma; Devon Ray Pacial; Diomedes A. Carino; Diomedes A. Cariño; Edsel Maurice Salvana; El King D. Morado; Elcid Aaron R. Pangilinan; Eva Maria Cutiongco-de la Paz; Francis A. Tablizo; Henrietta Marie Rodriguez; Jaime C. Montoya; Jan Michael C. Yap; Jarvin E. Nipales; Jo-Hannah S. Llamas; John Michael Egana; John Q. Wong; Joshua Gregor A. Dizon; Joshua Jose Endozo; Juan Antonio R. Magalang; Karol Sophia Agape R. Padilla; Kenneth M. Kim; Kris P. Punayan; Kristina Patriz Dela Cruz; Kristina Patriz Dela Cruz; Lindsay Claire D.L. Carandang; Lindsay Clare D.L. Carandang; Ma. Exanil Plantig; Marc Edsel C. Ayes; Maria Rosario Singh-Vergeire; Maria Rosario Singh-Vergeire and Cynthia P. Saloma; Maria Sofia L. Yangzon; Marielle M Gamboa; Marielle M. Gamboa; Marissa Alejandria; Nina Francesca Bustamante; Razel Nikka M. Hao; Renato Jacinto Q. Mantaring; Rianna Patricia S. Cruz; Sheila Mae M. Araiza; Yvonne Valerie Austria; Zipporah Mariebelle R. Enriquez; Zyrel V. Mollejon                        |                                                                                                                                                                                                                 |  |
| EPI_ISL_2859985, EPI_ISL_2860031, EPI_ISL_2860059, EPI_ISL_2860083, EPI_ISL_2860117, EPI_ISL_2860153, EPI_ISL_4715126, EPI_ISL_5568695                                                                                                                                                                                                                                                                                                                                                                                                                                                                                                                                                                                                                                                                                                                                                                                                                                                                                                                                                                                                                                                                                                                                                                                                                                                                                                                                                                                                                                                                                                                                                                                                                                                                                                                                                                                                                                                                                                                                                                                                                                                                                                                                                                                                                                                | Philippine Red Cross Logistics and Multipurpose Center              | Philippine Genome Center                                                                                                       | Alethea R. de Guzman; Alyssa Joyce E. Telles; Anna Ong-Lim; Arianne A. Zamora; Benedict A. Maralit; Carlo M. Lapid; Celia Carlos; Cynthia P. Saloma; Devon Ray Pacial; Diomedes A. Carino; Diomedes A. Cariño; Edsel Maurice Salvana; Edsel Maurice Salvaña; El King D. Morado; Elcid Aaron R. Pangilinan; Eva Maria Cutiongco-de la Paz; Francis A. Tablizo; Henrietta Marie Rodriguez; Jaime C. Montoya; Jan Michael C. Yap; Jarvin E. Nipales; Jo-Hannah S. Llamas; John Michael Egana; John Q. Wong; Joshua Gregor A. Dizon; Joshua Jose Endozo; Juan Antonio R. Magalang; Karol Sophia Agape R. Padilla; Kenneth M. Kim; Kris P. Punayan; Kristina Patriz Dela Cruz; Kristina Patriz Dela Cruz; Lindsay Claire D.L. Carandang; Lindsay Clare D.L. Carandang; Ma. Exanil Plantig; Marc Edsel C. Ayes; Maria Rosario Singh-Vergeire; Maria Rosario Singh-Vergeire and Cynthia P. Saloma; Maria Sofia L. Yangzon; Marielle M Gamboa; Marielle M. Gamboa; Marissa Alejandria; Nina Francesca Bustamante; Razel Nikka M. Hao; Renato Jacinto Q. Mantaring; Rianna Patricia S. Cruz; Sheila Mae M. Araiza; Yvonne Valerie Austria; Zipporah Mariebelle R. Enriquez; Zyrel V. Mollejon |                                                                                                                                                                                                                 |  |
| EPI_ISL_2860248, EPI_ISL_2860249, EPI_ISL_2860250, EPI_ISL_4715165, EPI_ISL_4716706, EPI_ISL_4716722, EPI_ISL_4716786, EPI_ISL_4716821, EPI_ISL_4716906, EPI_ISL_4716925, EPI_ISL_4717015, EPI_ISL_4741490, EPI_ISL_5542864, EPI_ISL_5547758, EPI_ISL_5552489, EPI_ISL_5552565, EPI_ISL_5568965, EPI_ISL_5570053, EPI_ISL_5570470, EPI_ISL_5570552, EPI_ISL_5570627                                                                                                                                                                                                                                                                                                                                                                                                                                                                                                                                                                                                                                                                                                                                                                                                                                                                                                                                                                                                                                                                                                                                                                                                                                                                                                                                                                                                                                                                                                                                                                                                                                                                                                                                                                                                                                                                                                                                                                                                                   | Philippine Red Cross- Batangas Chapter Molecular Laboratory         | Philippine Genome Center                                                                                                       | Alethea R. de Guzman; Alyssa Joyce E. Telles; Anna Ong-Lim; Arianne A. Zamora; Benedict A. Maralit; Carlo M. Lapid; Celia Carlos; Cynthia P. Saloma; Devon Ray Pacial; Diomedes A. Carino; Diomedes A. Cariño; Edsel Maurice Salvana; Edsel Maurice Salvaña; El King D. Morado; Elcid Aaron R. Pangilinan; Eva Maria Cutiongco-de la Paz; Francis A. Tablizo; Henrietta Marie Rodriguez; Jaime C. Montoya; Jan Michael C. Yap; Jarvin E. Nipales; Jo-Hannah S. Llamas; John Michael Egana; John Q. Wong; Joshua Gregor A. Dizon; Joshua Jose Endozo; Juan Antonio R. Magalang; Karol Sophia Agape R. Padilla; Kenneth M. Kim; Kris P. Punayan; Kristina Patriz Dela Cruz; Kristina Patriz Dela Cruz; Lindsay Claire D.L. Carandang; Lindsay Clare D.L. Carandang; Ma. Exanil Plantig; Marc Edsel C. Ayes; Maria Rosario Singh-Vergeire; Maria Rosario Singh-Vergeire and Cynthia P. Saloma; Maria Sofia L. Yangzon; Marielle M Gamboa; Marielle M. Gamboa; Marissa Alejandria; Nina Francesca Bustamante; Razel Nikka M. Hao; Renato Jacinto Q. Mantaring; Rianna Patricia S. Cruz; Sheila Mae M. Araiza; Yvonne Valerie Austria; Zipporah Mariebelle R. Enriquez; Zyrel V. Mollejon |                                                                                                                                                                                                                 |  |
| EPI_ISL_2878425, EPI_ISL_2878498                                                                                                                                                                                                                                                                                                                                                                                                                                                                                                                                                                                                                                                                                                                                                                                                                                                                                                                                                                                                                                                                                                                                                                                                                                                                                                                                                                                                                                                                                                                                                                                                                                                                                                                                                                                                                                                                                                                                                                                                                                                                                                                                                                                                                                                                                                                                                      | Plateau technique Biomer Metz Verriers                              | Department of Virology, Henri Mondor University Hospital, Assistance Publique Hôpitaux de Paris, Université Paris-Est          | Alexandre Soulier; Christophe Rodriguez; Elisabeth Trawinski; Guillaume Gricourt; Jean-Michel Pawlowski; Melissa N'Debi; Slim Fournati; Vanessa Demontant                                                                                                                                                                                                                                                                                                                                                                                                                                                                                                                                                                                                                                                                                                                                                                                                                                                                                                                                                                                                                            |                                                                                                                                                                                                                 |  |



|                                                                                                                                                                                                                                                                                                                                                                                                                                                                                                                                                                                                                                                                                                                                                                                                                                                                                                                                                                                                                                                                                                                                                                                                                                      |                                                                                |                                                                                                                                |                                                                                                                                                                                                                                                                                                                                                                                                                                                                                                                                                                                                                                                                                                                                                                                                                                                                                                                                                                                                                                                                                                               |
|--------------------------------------------------------------------------------------------------------------------------------------------------------------------------------------------------------------------------------------------------------------------------------------------------------------------------------------------------------------------------------------------------------------------------------------------------------------------------------------------------------------------------------------------------------------------------------------------------------------------------------------------------------------------------------------------------------------------------------------------------------------------------------------------------------------------------------------------------------------------------------------------------------------------------------------------------------------------------------------------------------------------------------------------------------------------------------------------------------------------------------------------------------------------------------------------------------------------------------------|--------------------------------------------------------------------------------|--------------------------------------------------------------------------------------------------------------------------------|---------------------------------------------------------------------------------------------------------------------------------------------------------------------------------------------------------------------------------------------------------------------------------------------------------------------------------------------------------------------------------------------------------------------------------------------------------------------------------------------------------------------------------------------------------------------------------------------------------------------------------------------------------------------------------------------------------------------------------------------------------------------------------------------------------------------------------------------------------------------------------------------------------------------------------------------------------------------------------------------------------------------------------------------------------------------------------------------------------------|
| EPI_ISL_2382651                                                                                                                                                                                                                                                                                                                                                                                                                                                                                                                                                                                                                                                                                                                                                                                                                                                                                                                                                                                                                                                                                                                                                                                                                      | ROB FERREIRA HOSPITAL                                                          | National Institute for Communicable Diseases of the National Health Laboratory Service                                         | Amoako DG; Bhiman JN; Ismail A; Mahlangu B; Mohale T; Ntuli N; Scheepers C                                                                                                                                                                                                                                                                                                                                                                                                                                                                                                                                                                                                                                                                                                                                                                                                                                                                                                                                                                                                                                    |
| EPI_ISL_2454664, EPI_ISL_2454665, EPI_ISL_2454669, EPI_ISL_2454670, EPI_ISL_2454671, EPI_ISL_2454676, EPI_ISL_2454679, EPI_ISL_2454682, EPI_ISL_2454683, EPI_ISL_2454688, EPI_ISL_2454694, EPI_ISL_2458287, EPI_ISL_2662475, EPI_ISL_2695608, EPI_ISL_2695609, EPI_ISL_2695611, EPI_ISL_2695620, EPI_ISL_2695755, EPI_ISL_3451453, EPI_ISL_3451462, EPI_ISL_3451463, EPI_ISL_3451464, EPI_ISL_3451470, EPI_ISL_3451479, EPI_ISL_3451488, EPI_ISL_3643973, EPI_ISL_4650621, EPI_ISL_4650622, EPI_ISL_4650628                                                                                                                                                                                                                                                                                                                                                                                                                                                                                                                                                                                                                                                                                                                          | ROB FERREIRA LABORATORY                                                        | National Institute for Communicable Diseases of the National Health Laboratory Service                                         | Amoako DG; Bhiman JN; Everatt J; Ismail A; Mahlangu B; Mnguni A; Mohale T; Ntuli N; Scheepers C                                                                                                                                                                                                                                                                                                                                                                                                                                                                                                                                                                                                                                                                                                                                                                                                                                                                                                                                                                                                               |
| EPI_ISL_3138807                                                                                                                                                                                                                                                                                                                                                                                                                                                                                                                                                                                                                                                                                                                                                                                                                                                                                                                                                                                                                                                                                                                                                                                                                      | RSPI Sulianti Saroso                                                           | National Institute of Health Research and Development                                                                          | Arie Ardiansyah Nugraha; Fajar Nur Sulistiyohadi; Hana Aparsi Pawestri; Hartanti Dian Ikawati; Kartika Dewi Puspa; Krisna Pangesti; Nelly Puspandari; Subangkit; Triyani Soekarso; Vivi Setiawaty                                                                                                                                                                                                                                                                                                                                                                                                                                                                                                                                                                                                                                                                                                                                                                                                                                                                                                             |
| EPI_ISL_3138796, EPI_ISL_3138799                                                                                                                                                                                                                                                                                                                                                                                                                                                                                                                                                                                                                                                                                                                                                                                                                                                                                                                                                                                                                                                                                                                                                                                                     | RSU Kartika Pulomas                                                            | National Institute of Health Research and Development                                                                          | Arie Ardiansyah Nugraha; Fajar Nur Sulistiyohadi; Hana Aparsi Pawestri; Hartanti Dian Ikawati; Kartika Dewi Puspa; Krisna Pangesti; Nelly Puspandari; Subangkit; Triyani Soekarso; Vivi Setiawaty                                                                                                                                                                                                                                                                                                                                                                                                                                                                                                                                                                                                                                                                                                                                                                                                                                                                                                             |
| EPI_ISL_2854722                                                                                                                                                                                                                                                                                                                                                                                                                                                                                                                                                                                                                                                                                                                                                                                                                                                                                                                                                                                                                                                                                                                                                                                                                      | RSUP Dr. Hasan Sadikin Bandung                                                 | National Institute of Health Research and Development                                                                          | ; Arie Ardiansyah Nugraha; Hana Aparsi Pawestri; Hartanti Dian Ikawati; Kartika Dewi Puspa; Krisna Pangesti; Nelly Puspandari; Subangkit; Triyani Soekarso; Vivi Setiawaty                                                                                                                                                                                                                                                                                                                                                                                                                                                                                                                                                                                                                                                                                                                                                                                                                                                                                                                                    |
| EPI_ISL_2811886                                                                                                                                                                                                                                                                                                                                                                                                                                                                                                                                                                                                                                                                                                                                                                                                                                                                                                                                                                                                                                                                                                                                                                                                                      | Raja Perempuan Zainab II Hospital, Kota Bharu                                  | Institute for Medical Research, Infectious Disease Research Centre, National Institutes of Health, Ministry of Health Malaysia | Azizan MA; Kamel K; Mohd Zawawi Z; Ramly N; Robert F; Suppiah J; Thayan R                                                                                                                                                                                                                                                                                                                                                                                                                                                                                                                                                                                                                                                                                                                                                                                                                                                                                                                                                                                                                                     |
| EPI_ISL_3999690                                                                                                                                                                                                                                                                                                                                                                                                                                                                                                                                                                                                                                                                                                                                                                                                                                                                                                                                                                                                                                                                                                                                                                                                                      | Recherche                                                                      | National Reference Centre for Viruses of Respiratory Infections, Institut Pasteur, Paris                                       | Angela Brisebarre; Camille Capel; Christophe Malabat; Corinne Maufrais; Etienne Simon-Lorière; Frédéric Lemoine; Julien Fumey; Louise Lefrançois; Marion Barbet; Maud Vanpeene; Méline Bizard; Slim El-Khiari; Sylvie Behillil; Sylvie Van der Werf; Vincent Enouf                                                                                                                                                                                                                                                                                                                                                                                                                                                                                                                                                                                                                                                                                                                                                                                                                                            |
| EPI_ISL_6010155                                                                                                                                                                                                                                                                                                                                                                                                                                                                                                                                                                                                                                                                                                                                                                                                                                                                                                                                                                                                                                                                                                                                                                                                                      | Reed Street CDC w/ RSC                                                         | NHLS/UJCT                                                                                                                      | Arash Iranzadeh; Bruna Galva; Carolyn Williamson; Deelan Doolabh; Diana Hardie; Gert Marais; Innocent Mudau; Lynn Tyers; Marvin Hsiao; Rageema Joseph; Stephen Korsman                                                                                                                                                                                                                                                                                                                                                                                                                                                                                                                                                                                                                                                                                                                                                                                                                                                                                                                                        |
| EPI_ISL_5556149                                                                                                                                                                                                                                                                                                                                                                                                                                                                                                                                                                                                                                                                                                                                                                                                                                                                                                                                                                                                                                                                                                                                                                                                                      | Region 1 Medical Center                                                        | Philippine Genome Center                                                                                                       | Alethea R. de Guzman; Alyssa Joyce E. Telles; Anna Ong-Lim; Arianne A. Zamora; Benedict A. Maralit; Carlo M. Lapid; Celia Carlos; Cynthia P. Saloma; Devon Ray Pacial; Diomedes A. Cariño; Edsel Maurice Salvana; El King D. Morado; Elcid Aaron R. Pangilinan; Eva Maria Cutiongco-de la Paz; Francis A. Tablizo; Henrietta Marie Rodriguez; Jaime C. Montoya; Jan Michael C. Yap; Jarvin E. Nipales; Jo-Hannah S. Llamas; John Michael Egana; John Q. Wong; Joshua Gregor A. Dizon; Joshua Jose Endozo; Juan Antonio R. Magalang; Karol Sophia Agape R. Padilla; Kris P. Punayan; Kristina Patriz Dela Cruz; Lindsay Clare D.L. Carandang; Ma. Exanil Plantig; Marc Edsel C. Ayes; Maria Rosario Singh-Vergeire; Maria Sofia L. Yangzon; Marielle M. Gamboa; Marissa Alejandria; Niña Francesca Bustamante; Razel Nikka M. Hao; Renato Jacinto Q. Mantaring; Rianna Patricia S. Cruz; Sheila Mae M. Araiza; Yvonne Valerie Austria; Zipporah Mariebelle R. Enriquez; Zyrel V. Mollejon                                                                                                                      |
| EPI_ISL_3402017, EPI_ISL_3403344, EPI_ISL_3471403, EPI_ISL_3471411, EPI_ISL_3471413                                                                                                                                                                                                                                                                                                                                                                                                                                                                                                                                                                                                                                                                                                                                                                                                                                                                                                                                                                                                                                                                                                                                                  | Regional Medical Sciences Center 11/1 Phuket                                   | National Institute of Health, Department of Medical Sciences, Ministry of Public Health, Thailand                              | ; Natchaya Khadsang; Nuttida Thongpramol; Pakorn Piromtong; Pilailuk Okada; Ratana Tacharoenmuang; Siripaporn Phuygun; Sittiporn Parmnen; Sunthareeya Waicharoen; Thanutsapa Thanadachakul; Warawan Wongboot; sirikanda wimol                                                                                                                                                                                                                                                                                                                                                                                                                                                                                                                                                                                                                                                                                                                                                                                                                                                                                 |
| EPI_ISL_2840595, EPI_ISL_2840596, EPI_ISL_2840597, EPI_ISL_3403352, EPI_ISL_3403353, EPI_ISL_3403354, EPI_ISL_3403355, EPI_ISL_3407844, EPI_ISL_3407848, EPI_ISL_3407860, EPI_ISL_3797056, EPI_ISL_3797057, EPI_ISL_3797058, EPI_ISL_4262471, EPI_ISL_4262472, EPI_ISL_4635432, EPI_ISL_4635434, EPI_ISL_4636421, EPI_ISL_4636435, EPI_ISL_4636436                                                                                                                                                                                                                                                                                                                                                                                                                                                                                                                                                                                                                                                                                                                                                                                                                                                                                   | Regional Medical Sciences Center 12 Songkhla                                   | National Institute of Health, Department of Medical Sciences, Ministry of Public Health, Thailand                              | ; Archawan Rojanawiwat; Natchaya Khadsang; Natchaya Khadsang; Nuttida Thongpramol; Pakorn Piromtong; Pilailuk Okada; Ratana Tacharoenmuang; Siripaporn Phuygun; Sittiporn Parmnen; Sunthareeya Waicharoen; Thanutsapa Thanadachakul; Warawan Wongboot; sirikanda wimol                                                                                                                                                                                                                                                                                                                                                                                                                                                                                                                                                                                                                                                                                                                                                                                                                                        |
| EPI_ISL_3403350, EPI_ISL_3471414, EPI_ISL_3471415, EPI_ISL_3534195, EPI_ISL_3534196, EPI_ISL_3534197                                                                                                                                                                                                                                                                                                                                                                                                                                                                                                                                                                                                                                                                                                                                                                                                                                                                                                                                                                                                                                                                                                                                 | Regional Medical Sciences Center 12/1 Trang                                    | National Institute of Health, Department of Medical Sciences, Ministry of Public Health, Thailand                              | ; Natchaya Khadsang; Nuttida Thongpramol; Pakorn Piromtong; Pilailuk Okada; Ratana Tacharoenmuang; Siripaporn Phuygun; Sittiporn Parmnen; Sunthareeya Waicharoen; Thanutsapa Thanadachakul; Warawan Wongboot; sirikanda wimol                                                                                                                                                                                                                                                                                                                                                                                                                                                                                                                                                                                                                                                                                                                                                                                                                                                                                 |
| EPI_ISL_3471404                                                                                                                                                                                                                                                                                                                                                                                                                                                                                                                                                                                                                                                                                                                                                                                                                                                                                                                                                                                                                                                                                                                                                                                                                      | Regional Medical Sciences Center 9 Nakhon Ratchasima                           | National Institute of Health, Department of Medical Sciences, Ministry of Public Health, Thailand                              | ; Natchaya Khadsang; Nuttida Thongpramol; Pakorn Piromtong; Pilailuk Okada; Ratana Tacharoenmuang; Siripaporn Phuygun; Sittiporn Parmnen; Sunthareeya Waicharoen; Thanutsapa Thanadachakul; Warawan Wongboot; sirikanda wimol                                                                                                                                                                                                                                                                                                                                                                                                                                                                                                                                                                                                                                                                                                                                                                                                                                                                                 |
| EPI_ISL_2374156, EPI_ISL_2374157                                                                                                                                                                                                                                                                                                                                                                                                                                                                                                                                                                                                                                                                                                                                                                                                                                                                                                                                                                                                                                                                                                                                                                                                     | Research                                                                       | National Reference Centre for Viruses of Respiratory Infections, Institut Pasteur, Paris                                       | Angela Brisebarre; Camille Capel; Christophe Malabat; Corinne Maufrais; Etienne Simon-Lorière; Frédéric Lemoine; Louise Lefrançois; Marianne Leruez-Ville; Marion Barbet; Maud Vanpeene; Méline Bizard; Sylvie Behillil; Sylvie Van der Werf; Vincent Enouf                                                                                                                                                                                                                                                                                                                                                                                                                                                                                                                                                                                                                                                                                                                                                                                                                                                   |
| EPI_ISL_2859307, EPI_ISL_2859310, EPI_ISL_2859311, EPI_ISL_2859314, EPI_ISL_2859322, EPI_ISL_2859326, EPI_ISL_2859331, EPI_ISL_2859335, EPI_ISL_2859346, EPI_ISL_2859347, EPI_ISL_2859350, EPI_ISL_2859351, EPI_ISL_2859355, EPI_ISL_2859357, EPI_ISL_2859362, EPI_ISL_2859363, EPI_ISL_2859364, EPI_ISL_2859959, EPI_ISL_2860014, EPI_ISL_2860066, EPI_ISL_2860081, EPI_ISL_2860126, EPI_ISL_2860136, EPI_ISL_2860162, EPI_ISL_4713304, EPI_ISL_4714962, EPI_ISL_4715008, EPI_ISL_4715142, EPI_ISL_4716258, EPI_ISL_4716628, EPI_ISL_4716508, EPI_ISL_4716676, EPI_ISL_4716703, EPI_ISL_4716739, EPI_ISL_4716863, EPI_ISL_4717155, EPI_ISL_4742120, EPI_ISL_4742185, EPI_ISL_4742248, EPI_ISL_4742267, EPI_ISL_5541130, EPI_ISL_5541196, EPI_ISL_5541366, EPI_ISL_5541458, EPI_ISL_5541465, EPI_ISL_5541467, EPI_ISL_5541477, EPI_ISL_5541491, EPI_ISL_5543278, EPI_ISL_5543282, EPI_ISL_5543285, EPI_ISL_5543286, EPI_ISL_5543292, EPI_ISL_5544005, EPI_ISL_5544026, EPI_ISL_5544088, EPI_ISL_5544089, EPI_ISL_5544122, EPI_ISL_5547805, EPI_ISL_5556134, EPI_ISL_5562695, EPI_ISL_5562784, EPI_ISL_5562830, EPI_ISL_5563053, EPI_ISL_5568901, EPI_ISL_5568952, EPI_ISL_5569327, EPI_ISL_5570136, EPI_ISL_5570217, EPI_ISL_5570545 | Research Institute for Tropical Medicine, Inc. (RITM)                          | Philippine Genome Center                                                                                                       | Alethea R. de Guzman; Alyssa Joyce E. Telles; Anna Ong-Lim; Arianne A. Zamora; Benedict A. Maralit; Carlo M. Lapid; Celia Carlos; Cynthia P. Saloma; Devon Ray Pacial; Diomedes A. Cariño; Edsel Maurice Salvana; Edsel Maurice Salvaña; El King D. Morado; Elcid Aaron R. Pangilinan; Eva Maria Cutiongco-de la Paz; Francis A. Tablizo; Henrietta Marie Rodriguez; Jaime C. Montoya; Jan Michael C. Yap; Jarvin E. Nipales; Jo-Hannah S. Llamas; John Michael Egana; John Q. Wong; Joshua Gregor A. Dizon; Joshua Jose Endozo; Juan Antonio R. Magalang; Karol Sophia Agape R. Padilla; Kenneth M. Kim; Kris P. Punayan; Kristina Patriz Dela Cruz; Kristina Patriz Dela Cruz; Lindsay Claire D.L. Carandang; Lindsay Clare D.L. Carandang; Ma. Exanil Plantig; Marc Edsel C. Ayes; Maria Rosario Singh-Vergeire; Maria Sofia L. Yangzon; Marielle M. Gamboa; Marielle M. Gamboa; Marissa Alejandria; Niña Francesca Bustamante; Razel Nikka M. Hao; Renato Jacinto Q. Mantaring; Rianna Patricia S. Cruz; Sheila Mae M. Araiza; Yvonne Valerie Austria; Zipporah Mariebelle R. Enriquez; Zyrel V. Mollejon |
| EPI_ISL_2735816, EPI_ISL_2735859, EPI_ISL_2736007, EPI_ISL_2736553, EPI_ISL_2736559, EPI_ISL_2736566, EPI_ISL_2736870, EPI_ISL_2737090, EPI_ISL_2737095, EPI_ISL_2737107, EPI_ISL_2737500, EPI_ISL_2737535, EPI_ISL_2738128, EPI_ISL_2738659, EPI_ISL_2740251, EPI_ISL_2740296, EPI_ISL_2740298, EPI_ISL_2741276, EPI_ISL_2742206, EPI_ISL_2742234, EPI_ISL_2742239, EPI_ISL_2742342, EPI_ISL_3776012, EPI_ISL_3776303, EPI_ISL_3776308, EPI_ISL_3776699, EPI_ISL_3776701, EPI_ISL_3776707, EPI_ISL_3776727, EPI_ISL_3776826, EPI_ISL_3776865, EPI_ISL_3776862, EPI_ISL_3776993, EPI_ISL_3777015, EPI_ISL_3777017, EPI_ISL_3777102, EPI_ISL_4308514, EPI_ISL_5274500                                                                                                                                                                                                                                                                                                                                                                                                                                                                                                                                                                 | Respiratory Virus Unit, Microbiology Services Colindale, Public Health England | COVID-19 Genomics UK (COG-UK) Consortium                                                                                       | PHE Covid Sequencing Team                                                                                                                                                                                                                                                                                                                                                                                                                                                                                                                                                                                                                                                                                                                                                                                                                                                                                                                                                                                                                                                                                     |
| EPI_ISL_5541323                                                                                                                                                                                                                                                                                                                                                                                                                                                                                                                                                                                                                                                                                                                                                                                                                                                                                                                                                                                                                                                                                                                                                                                                                      | Roxas Memorial Provincial Hospital Molecular Laboratory                        | Philippine Genome Center                                                                                                       | Alethea R. de Guzman; Anna Ong-Lim; Arianne A. Zamora; Benedict A. Maralit; Carlo M. Lapid; Celia Carlos; Cynthia P. Saloma; Devon Ray Pacial; Diomedes A. Cariño; Edsel Maurice Salvana; El King D. Morado; Elcid Aaron R. Pangilinan; Eva Maria Cutiongco-de la Paz; Francis A. Tablizo; Henrietta Marie Rodriguez; Jaime C. Montoya; Jan Michael C. Yap; Jarvin E. Nipales; Jo-Hannah S. Llamas; John Q. Wong; Joshua Gregor A. Dizon; Juan Antonio R. Magalang; Karol Sophia Agape R. Padilla; Kenneth M. Kim; Kris P. Punayan; Kristina Patriz Dela Cruz; Kristina Patriz Dela Cruz; Lindsay Claire D.L. Carandang; Lindsay Clare D.L. Carandang; Ma. Exanil Plantig; Marc Edsel C. Ayes; Maria Rosario Singh-Vergeire; Maria Sofia L. Yangzon; Marielle M. Gamboa; Marielle M. Gamboa; Marissa Alejandria; Niña Francesca Bustamante; Razel Nikka M. Hao; Renato Jacinto Q. Mantaring; Rianna Patricia S. Cruz; Sheila Mae M. Araiza; Yvonne Valerie Austria; Zipporah Mariebelle R. Enriquez; Zyrel V. Mollejon                                                                                        |
| EPI_ISL_2691915, EPI_ISL_2691928, EPI_ISL_3388732                                                                                                                                                                                                                                                                                                                                                                                                                                                                                                                                                                                                                                                                                                                                                                                                                                                                                                                                                                                                                                                                                                                                                                                    | Rush University Medical Center                                                 | RIPHL at Rush University Medical Center                                                                                        | Diane Springer; Edith Perez; Felix Araujo Perez; Joyce Houlihan; Kevin Kunstman; Laura Furtado; Marieta Hyde; Mary Hayden; Max Kolton; Stefan Green                                                                                                                                                                                                                                                                                                                                                                                                                                                                                                                                                                                                                                                                                                                                                                                                                                                                                                                                                           |
| EPI_ISL_4768119                                                                                                                                                                                                                                                                                                                                                                                                                                                                                                                                                                                                                                                                                                                                                                                                                                                                                                                                                                                                                                                                                                                                                                                                                      | Rwanda National Joint Taskforce COVID-51                                       | Africa Centre for Excellence for Genomics of Infectious Diseases (ACEGID), Redeemer's University                               | A.N.; A.T.; Abechi; Ahmed, M.; Ajogbasile; Akano; Alice Kabanda; Ariene Uwituze; Ayo-Ale, B.; Ayoade, F.; C.A.; C.T.; Chukwu, G.; Dieudonne Mutangana; Enatha Mukantwari; Eromon; Esperance Umumararungu; F.V.; Folarin, O.; Happi; I.B.; Izuwayo Gerard; J.N.; J.U.; K.O.; Kayode; Leon Mutesa; Murebwayire Clarisse; Nosamiefan, I.; Oguzie; Okolie, J.; Olawoye; Olumade; Oluniyi; Ope-Ewe, O.; P.E.; P.S.; Philip, C.; Robert Rutayisire; Sindayiheba Reuben; Sobajo, T.; T.J.; Ugwu; Umuringa Jeanne d'Arc; Uwanibe; Yvan Butera                                                                                                                                                                                                                                                                                                                                                                                                                                                                                                                                                                         |
| EPI_ISL_4768081                                                                                                                                                                                                                                                                                                                                                                                                                                                                                                                                                                                                                                                                                                                                                                                                                                                                                                                                                                                                                                                                                                                                                                                                                      | Rwanda National Joint Taskforce COVID-53                                       | Africa Centre for Excellence for Genomics of Infectious Diseases (ACEGID), Redeemer's University                               | A.N.; A.T.; Abechi; Ahmed, M.; Ajogbasile; Akano; Alice Kabanda; Ariene Uwituze; Ayo-Ale, B.; Ayoade, F.; C.A.; C.T.; Chukwu, G.; Dieudonne Mutangana; Enatha Mukantwari; Eromon; Esperance Umumararungu; F.V.; Folarin, O.; Happi; I.B.; Izuwayo Gerard; J.N.; J.U.; K.O.; Kayode; Leon Mutesa; Murebwayire Clarisse; Nosamiefan, I.; Oguzie; Okolie, J.; Olawoye; Olumade; Oluniyi; Ope-Ewe, O.; P.E.; P.S.; Philip, C.; Robert Rutayisire; Sindayiheba Reuben; Sobajo, T.; T.J.; Ugwu; Umuringa Jeanne d'Arc; Uwanibe; Yvan Butera                                                                                                                                                                                                                                                                                                                                                                                                                                                                                                                                                                         |
| EPI_ISL_4768099                                                                                                                                                                                                                                                                                                                                                                                                                                                                                                                                                                                                                                                                                                                                                                                                                                                                                                                                                                                                                                                                                                                                                                                                                      | Rwanda National Joint Taskforce COVID-67                                       | Africa Centre for Excellence for Genomics of Infectious Diseases (ACEGID), Redeemer's University                               | A.N.; A.T.; Abechi; Ahmed, M.; Ajogbasile; Akano; Alice Kabanda; Ariene Uwituze; Ayo-Ale, B.; Ayoade, F.; C.A.; C.T.; Chukwu, G.; Dieudonne Mutangana; Enatha Mukantwari; Eromon; Esperance Umumararungu; F.V.; Folarin, O.; Happi; I.B.; Izuwayo Gerard; J.N.; J.U.; K.O.; Kayode; Leon Mutesa; Murebwayire Clarisse; Nosamiefan, I.; Oguzie; Okolie, J.; Olawoye; Olumade; Oluniyi; Ope-Ewe, O.; P.E.; P.S.; Philip, C.; Robert Rutayisire; Sindayiheba Reuben; Sobajo, T.; T.J.; Ugwu; Umuringa Jeanne d'Arc; Uwanibe; Yvan Butera                                                                                                                                                                                                                                                                                                                                                                                                                                                                                                                                                                         |
| EPI_ISL_4768105                                                                                                                                                                                                                                                                                                                                                                                                                                                                                                                                                                                                                                                                                                                                                                                                                                                                                                                                                                                                                                                                                                                                                                                                                      | Rwanda National Joint Taskforce COVID-74                                       | Africa Centre for Excellence for Genomics of Infectious Diseases (ACEGID), Redeemer's University                               | A.N.; A.T.; Abechi; Ahmed, M.; Ajogbasile; Akano; Alice Kabanda; Ariene Uwituze; Ayo-Ale, B.; Ayoade, F.; C.A.; C.T.; Chukwu, G.; Dieudonne Mutangana; Enatha Mukantwari; Eromon; Esperance Umumararungu; F.V.; Folarin, O.; Happi; I.B.; Izuwayo Gerard; J.N.; J.U.; K.O.; Kayode; Leon Mutesa; Murebwayire Clarisse; Nosamiefan, I.; Oguzie; Okolie, J.; Olawoye; Olumade; Oluniyi; Ope-Ewe, O.; P.E.; P.S.; Philip, C.; Robert Rutayisire; Sindayiheba Reuben; Sobajo, T.; T.J.; Ugwu; Umuringa Jeanne d'Arc; Uwanibe; Yvan Butera                                                                                                                                                                                                                                                                                                                                                                                                                                                                                                                                                                         |
| EPI_ISL_4768072                                                                                                                                                                                                                                                                                                                                                                                                                                                                                                                                                                                                                                                                                                                                                                                                                                                                                                                                                                                                                                                                                                                                                                                                                      | Rwanda National Joint Taskforce COVID-87                                       | Africa Centre for Excellence for Genomics of Infectious Diseases (ACEGID), Redeemer's University                               | A.N.; A.T.; Abechi; Ahmed, M.; Ajogbasile; Akano; Alice Kabanda; Ariene Uwituze; Ayo-Ale, B.; Ayoade, F.; C.A.; C.T.; Chukwu, G.; Dieudonne Mutangana; Enatha Mukantwari; Eromon; Esperance Umumararungu; F.V.; Folarin, O.; Happi; I.B.; Izuwayo Gerard; J.N.; J.U.; K.O.; Kayode; Leon Mutesa; Murebwayire Clarisse; Nosamiefan, I.; Oguzie; Okolie, J.; Olawoye; Olumade; Oluniyi; Ope-Ewe, O.; P.E.; P.S.; Philip, C.; Robert Rutayisire; Sindayiheba Reuben; Sobajo, T.; T.J.; Ugwu; Umuringa Jeanne d'Arc; Uwanibe; Yvan Butera                                                                                                                                                                                                                                                                                                                                                                                                                                                                                                                                                                         |
| EPI_ISL_3154153, EPI_ISL_3154164                                                                                                                                                                                                                                                                                                                                                                                                                                                                                                                                                                                                                                                                                                                                                                                                                                                                                                                                                                                                                                                                                                                                                                                                     | Réunilab                                                                       | UMR PIMIT                                                                                                                      | Dr Camille Lebarbenchon; Dr David A Wilkinson; Dr Patrick Mavingui; Magali Turpin; Marie-Alice Simbi                                                                                                                                                                                                                                                                                                                                                                                                                                                                                                                                                                                                                                                                                                                                                                                                                                                                                                                                                                                                          |
| EPI_ISL_2996807                                                                                                                                                                                                                                                                                                                                                                                                                                                                                                                                                                                                                                                                                                                                                                                                                                                                                                                                                                                                                                                                                                                                                                                                                      | S.C. Laboratorio Analiis, ASL 3 Liguria                                        | U.O. Igiene, Ospedale Policlinico San Martino                                                                                  | Bruzzoze Bianca; Caligiuri Patrizia; De Pace Vanessa; Domnich Alexander; Icardi Giancarlo on behalf of SARS-CoV-2 ITALIAN RESEARCH ENTERPRISE (SCIRE) Collaborative Group; Orsi Andrea; Ricucci Valentina; Spitaleri Antonio                                                                                                                                                                                                                                                                                                                                                                                                                                                                                                                                                                                                                                                                                                                                                                                                                                                                                  |
| EPI_ISL_2839981, EPI_ISL_3153873, EPI_ISL_3154090, EPI_ISL_3154091                                                                                                                                                                                                                                                                                                                                                                                                                                                                                                                                                                                                                                                                                                                                                                                                                                                                                                                                                                                                                                                                                                                                                                   | SA Pathology SAINT BENOIT                                                      | SA Pathology UMR PIMIT                                                                                                         | Caitlin Selway; Chuan Kok Lim; Geoff Higgins; Ivan Bastian; Lex Leong; Mark Turra<br>Dr Camille Lebarbenchon; Dr David A Wilkinson; Dr Patrick Mavingui; Magali Turpin; Marie-Alice Simbi                                                                                                                                                                                                                                                                                                                                                                                                                                                                                                                                                                                                                                                                                                                                                                                                                                                                                                                     |
| EPI_ISL_4459414                                                                                                                                                                                                                                                                                                                                                                                                                                                                                                                                                                                                                                                                                                                                                                                                                                                                                                                                                                                                                                                                                                                                                                                                                      | SAN JOSE MUNICIPAL HEALTH OFFICE                                               | Research Institute for Tropical Medicine/Tohoku University                                                                     | Allen Anthony Laraño; Ardiane Ysabelle Dolor; Catalino Demetria; Clyde Dapag; Emmanuel Kagning Tsinda; Francisco Gerardo Polotan; Hitoshi Oshitani; Inez Andrea Medado; Jefferson Earl Halog; Lei Lanna Dancel; Leilanie Nacion; Ma. Angelica Tujan; Machiko Okamoto; Maria Carmen Corpuz; Mariko Siato-Obata; Mayuko Saito                                                                                                                                                                                                                                                                                                                                                                                                                                                                                                                                                                                                                                                                                                                                                                                   |
| EPI_ISL_2649033, EPI_ISL_2982092, EPI_ISL_2982093                                                                                                                                                                                                                                                                                                                                                                                                                                                                                                                                                                                                                                                                                                                                                                                                                                                                                                                                                                                                                                                                                                                                                                                    | SARS-CoV-2 Sequencing Castilla y Leon-Spain Consortium                         | SARS-CoV-2 Sequencing Castilla y Leon-Spain Consortium                                                                         | Antonio Orduña-Domingo; Carlos Fuster Foz; Carmen Aldea-Mansilla; Carmen Gimeno Crespo; David Abad; Gabriel March Rosello; Gregoria Mejias Lobón; Jose Maria Eiros Bouza; Laura Sánchez de Prada; M. Isabel Fernandez-Natal; Marta Dominguez-Gil; Marta Hernandez; María Antonia García Castro; M <sup>re</sup> Fe Bрезmes-Valdivieso; Noelia Arenal Andrés; Sílvia Rojo; Sonsoles Garcinuño Pérez                                                                                                                                                                                                                                                                                                                                                                                                                                                                                                                                                                                                                                                                                                            |

|                                                                                                                                                                                                                                                                                                                                                                                                                                                          |                                                                    |                                                                                                                                            |                                                                                                                                                                                                                                                                                                                                                                                                                                                                                                                                                                                                                                                                                                                                                                                                                                                                                                                                                                                                          |
|----------------------------------------------------------------------------------------------------------------------------------------------------------------------------------------------------------------------------------------------------------------------------------------------------------------------------------------------------------------------------------------------------------------------------------------------------------|--------------------------------------------------------------------|--------------------------------------------------------------------------------------------------------------------------------------------|----------------------------------------------------------------------------------------------------------------------------------------------------------------------------------------------------------------------------------------------------------------------------------------------------------------------------------------------------------------------------------------------------------------------------------------------------------------------------------------------------------------------------------------------------------------------------------------------------------------------------------------------------------------------------------------------------------------------------------------------------------------------------------------------------------------------------------------------------------------------------------------------------------------------------------------------------------------------------------------------------------|
| EPI_ISL_2982094,<br>EPI_ISL_3646345                                                                                                                                                                                                                                                                                                                                                                                                                      |                                                                    |                                                                                                                                            |                                                                                                                                                                                                                                                                                                                                                                                                                                                                                                                                                                                                                                                                                                                                                                                                                                                                                                                                                                                                          |
| EPI_ISL_2447604, EPI_ISL_2447608, EPI_ISL_2447610, EPI_ISL_2447639, EPI_ISL_2447662, EPI_ISL_2621738, EPI_ISL_2621752, EPI_ISL_2621763, EPI_ISL_2621765, EPI_ISL_2621769, EPI_ISL_2621773, EPI_ISL_2674806, EPI_ISL_2760182, EPI_ISL_2760183, EPI_ISL_2828277, EPI_ISL_2828286, EPI_ISL_2828296, EPI_ISL_2828297, EPI_ISL_2828298, EPI_ISL_2930571, EPI_ISL_2930611, EPI_ISL_3076630, EPI_ISL_3076635, EPI_ISL_3076655, EPI_ISL_3076713, EPI_ISL_3392277 |                                                                    |                                                                                                                                            |                                                                                                                                                                                                                                                                                                                                                                                                                                                                                                                                                                                                                                                                                                                                                                                                                                                                                                                                                                                                          |
| see above                                                                                                                                                                                                                                                                                                                                                                                                                                                | SARS-CoV-2 testing team, National Institute of Infectious Diseases | Pathogen Genomics Center, National Institute of Infectious Diseases                                                                        | Hazuka Y Furihata; Hiromizu Takahashi; Kentaro Itokawa; Makoto Kuroda; Masanori Hashino; Masumichi Saito; Naomi Nojiri; Nozomu Hanaoka; Rina Tanaka; Sana Uchikoba; Tsugoto Fujimoto; Tsuyoshi Sekizuka                                                                                                                                                                                                                                                                                                                                                                                                                                                                                                                                                                                                                                                                                                                                                                                                  |
| EPI_ISL_2567592,<br>EPI_ISL_3242443                                                                                                                                                                                                                                                                                                                                                                                                                      | SC (UCO) Igiene e Sanità Pubblica, ASUGI, Trieste                  | ARGO Laboratorio Genomica ed Epigenomica                                                                                                   | Barbone F; Braida C; Busetti M; D'Agaro P; Dal Monego S; Degasperri M; Fontana F; Licastro D; Marcello A; Piscianz E; Segat L                                                                                                                                                                                                                                                                                                                                                                                                                                                                                                                                                                                                                                                                                                                                                                                                                                                                            |
| EPI_ISL_2383950, EPI_ISL_3354066, EPI_ISL_3354150, EPI_ISL_3354165, EPI_ISL_3354246, EPI_ISL_3354248, EPI_ISL_3354406, EPI_ISL_3354948                                                                                                                                                                                                                                                                                                                   | see above                                                          | SC Dept of Health and Env. Control- Bureau of Laboratories                                                                                 | Centers for Disease Control and Prevention Division of Viral Diseases, Pathogen Discovery                                                                                                                                                                                                                                                                                                                                                                                                                                                                                                                                                                                                                                                                                                                                                                                                                                                                                                                |
| EPI_ISL_2465017                                                                                                                                                                                                                                                                                                                                                                                                                                          | SELAS CERBALLIANCE Normandieu                                      | Department of Virology, Henri Mondor University Hospital, Assistance Publique Hôpitaux de Paris, Université Paris-Est Créteil, INSERM U955 | Alexandre Soulier; Christophe Rodriguez; Elisabeth Trawinski; Guillaume Gricourt; Jean-Michel Pawlotsky; Melissa N'Debi; Slim Fourati; Vanessa Demontant                                                                                                                                                                                                                                                                                                                                                                                                                                                                                                                                                                                                                                                                                                                                                                                                                                                 |
| EPI_ISL_2637723,<br>EPI_ISL_2795681,<br>EPI_ISL_2795852,<br>EPI_ISL_2878293                                                                                                                                                                                                                                                                                                                                                                              | SELAS MEDILYS                                                      | Department of Virology, Henri Mondor University Hospital, Assistance Publique Hôpitaux de Paris, Université Paris-Est Créteil, INSERM U955 | Alexandre Soulier; Christophe Rodriguez; Elisabeth Trawinski; Guillaume Gricourt; Jean-Michel Pawlotsky; Melissa N'Debi; Slim Fourati; Vanessa Demontant                                                                                                                                                                                                                                                                                                                                                                                                                                                                                                                                                                                                                                                                                                                                                                                                                                                 |
| EPI_ISL_2586689                                                                                                                                                                                                                                                                                                                                                                                                                                          | SK-Roy Romanow Provincial Laboratory                               | National Microbiology Laboratory (NML)                                                                                                     | Amanda Lang; Anna Majer; Anneliese Landgraff; CanCOGeN's metadata curation team; Darian Hole; Elsie Grudski; Gary Van Domselaar; Grace Seo; Jennifer Tanner; Jessica Minion; Kirsten Biggar; Madison Chapel; Morag Graham; Natalie Knox; Nathalie Bastien; Philip Mabon; Public Health Agency of Canada CanCOGeN team; Rachel DePaulo; Rhiannon Huzarewich; Russell Mandes; Ryan McDonald; Shari Tyson; Timothy Booth; Yan Li                                                                                                                                                                                                                                                                                                                                                                                                                                                                                                                                                                            |
| EPI_ISL_4052969,<br>EPI_ISL_4052970                                                                                                                                                                                                                                                                                                                                                                                                                      | SLR Research                                                       | Abbott                                                                                                                                     | Ana Olivo; Ana Vallari; Barbara Harris; Gavin Cloherty; Mary Rodgers; Todd Meyer                                                                                                                                                                                                                                                                                                                                                                                                                                                                                                                                                                                                                                                                                                                                                                                                                                                                                                                         |
| EPI_ISL_2450588                                                                                                                                                                                                                                                                                                                                                                                                                                          | SOGAZ PROFMEDICINA LLC                                             | WHO National Influenza Centre Russian Federation                                                                                           | Andrey Komissarov; Artem Fadeev; Daria Danilenko; Dmitry Lioznov; Elena Nabieva; Galina Razbitskova; Georgii Bazykin; Kirill Varchenko; Ksenia Safina; Kseniya Komissarova; Larisa Gritsay; Maria Pisareva; Maria Timofeeva; Mikhail Bakaev; Nikita Yolshin; Oleg Lezhnev; Oula Mansour; Tamila Museeva; Veronika Eder                                                                                                                                                                                                                                                                                                                                                                                                                                                                                                                                                                                                                                                                                   |
| EPI_ISL_6492245                                                                                                                                                                                                                                                                                                                                                                                                                                          | SRC VB "Vector", "Collection of microorganisms" Department.        | State Research Center of Virology and Biotechnology (VECTOR) Collection of microorganisms Department                                       | Alexander N. Shvalov; Anastasiya A. Nazarenko; Anastasiya M. Smirnova; Elena V. Gavrilova; Oleg V. Pyankov; Rinat A. Maksyutov; Sergey A. Bodnev; Tatyana V. Tregubchak                                                                                                                                                                                                                                                                                                                                                                                                                                                                                                                                                                                                                                                                                                                                                                                                                                  |
| EPI_ISL_2421055, EPI_ISL_2421058, EPI_ISL_2421060, EPI_ISL_2422284, EPI_ISL_2422287, EPI_ISL_2422291, EPI_ISL_2422310, EPI_ISL_3030928, EPI_ISL_3030929, EPI_ISL_3030931                                                                                                                                                                                                                                                                                 | see above                                                          | SUNY UPSTATE MEDICAL UNIVERSITY                                                                                                            | Wadsworth Center, New York State Department of Health                                                                                                                                                                                                                                                                                                                                                                                                                                                                                                                                                                                                                                                                                                                                                                                                                                                                                                                                                    |
| EPI_ISL_5156366,<br>EPI_ISL_5156367,<br>EPI_ISL_5156368,<br>EPI_ISL_5156369,<br>EPI_ISL_5156370,<br>EPI_ISL_5156653                                                                                                                                                                                                                                                                                                                                      | SUNY Upstate Medical University                                    | 505 Irving Avenue, Syracuse, NY 13210 - Frank Middleton Lab                                                                                | Brian Pavlovitz; Frank Middleton                                                                                                                                                                                                                                                                                                                                                                                                                                                                                                                                                                                                                                                                                                                                                                                                                                                                                                                                                                         |
| EPI_ISL_2402429, EPI_ISL_2426579, EPI_ISL_2426605, EPI_ISL_2426610, EPI_ISL_2483910, EPI_ISL_2612834, EPI_ISL_2612835, EPI_ISL_2612836                                                                                                                                                                                                                                                                                                                   | see above                                                          | SYNLAB                                                                                                                                     | GIGA Medical Genomics                                                                                                                                                                                                                                                                                                                                                                                                                                                                                                                                                                                                                                                                                                                                                                                                                                                                                                                                                                                    |
| EPI_ISL_2642143, EPI_ISL_2642151, EPI_ISL_2642162, EPI_ISL_2642280, EPI_ISL_2642324, EPI_ISL_2642914, EPI_ISL_2642927, EPI_ISL_2642928, EPI_ISL_2642947, EPI_ISL_2642952, EPI_ISL_2642956, EPI_ISL_2643081, EPI_ISL_2643090, EPI_ISL_2643148                                                                                                                                                                                                             | see above                                                          | SYNLAB Eesti OÜ                                                                                                                            | Department of Microbiology, Institute of Biomedicine and Translational Medicine, University of Tartu                                                                                                                                                                                                                                                                                                                                                                                                                                                                                                                                                                                                                                                                                                                                                                                                                                                                                                     |
| EPI_ISL_2389582                                                                                                                                                                                                                                                                                                                                                                                                                                          | SYNLAB MVZ Berlin                                                  | Robert Koch Institute                                                                                                                      | Aare Abroi; Andrio Lahaesara; Arina Shablinskaja; Dagmar Hoidmets; Ene-Ly Jõgeda; Eveli Kallas; Heiki Niglas; Irja Lutsar; Kai Truusalu; Kaisa Truus; Katrin Kaarna; Kristi Huik; Liidia Dotsenko; Lili Azin Milani; Mari-Anne Härma; Mats Hansen; Meri Pauskar; Olga Sadikova; Paul Naaber; Radko Avi; Taavi Päll; Tuuli Reitsberg; Ulvi Gerst Talas                                                                                                                                                                                                                                                                                                                                                                                                                                                                                                                                                                                                                                                    |
| EPI_ISL_2389848                                                                                                                                                                                                                                                                                                                                                                                                                                          | SYNLAB MVZ Heidelberg                                              | Robert Koch Institute                                                                                                                      |                                                                                                                                                                                                                                                                                                                                                                                                                                                                                                                                                                                                                                                                                                                                                                                                                                                                                                                                                                                                          |
| EPI_ISL_2469571,<br>EPI_ISL_2631566,<br>EPI_ISL_2631582,<br>EPI_ISL_2631616,<br>EPI_ISL_2631694                                                                                                                                                                                                                                                                                                                                                          | SYNLAB MVZ Leinfelden-Echterdingen                                 | Robert Koch Institute                                                                                                                      |                                                                                                                                                                                                                                                                                                                                                                                                                                                                                                                                                                                                                                                                                                                                                                                                                                                                                                                                                                                                          |
| EPI_ISL_2389619                                                                                                                                                                                                                                                                                                                                                                                                                                          | SYNLAB MVZ Leverkusen                                              | Robert Koch Institute                                                                                                                      |                                                                                                                                                                                                                                                                                                                                                                                                                                                                                                                                                                                                                                                                                                                                                                                                                                                                                                                                                                                                          |
| EPI_ISL_2389744,<br>EPI_ISL_3239075                                                                                                                                                                                                                                                                                                                                                                                                                      | SYNLAB MVZ Trier                                                   | Robert Koch Institute                                                                                                                      |                                                                                                                                                                                                                                                                                                                                                                                                                                                                                                                                                                                                                                                                                                                                                                                                                                                                                                                                                                                                          |
| EPI_ISL_2635450,<br>EPI_ISL_3238961                                                                                                                                                                                                                                                                                                                                                                                                                      | SYNLAB MVZ Weiden                                                  | Robert Koch Institute                                                                                                                      |                                                                                                                                                                                                                                                                                                                                                                                                                                                                                                                                                                                                                                                                                                                                                                                                                                                                                                                                                                                                          |
| EPI_ISL_2364025, EPI_ISL_2364029, EPI_ISL_2506274, EPI_ISL_2506664, EPI_ISL_2506948, EPI_ISL_2506951, EPI_ISL_2507503, EPI_ISL_2507514, EPI_ISL_2507518, EPI_ISL_2507759, EPI_ISL_2507763, EPI_ISL_2507768, EPI_ISL_2507770, EPI_ISL_2507771, EPI_ISL_2507969, EPI_ISL_2507971, EPI_ISL_2507978, EPI_ISL_2508194, EPI_ISL_2509015, EPI_ISL_2509019, EPI_ISL_2509042, EPI_ISL_2509054                                                                     | see above                                                          | SYNLAB Suomi                                                                                                                               | Expert Microbiology, National Institute for Health and Welfare                                                                                                                                                                                                                                                                                                                                                                                                                                                                                                                                                                                                                                                                                                                                                                                                                                                                                                                                           |
| EPI_ISL_4713592,<br>EPI_ISL_4741551,<br>EPI_ISL_4741585,<br>EPI_ISL_5538611,<br>EPI_ISL_5543985,<br>EPI_ISL_5562302                                                                                                                                                                                                                                                                                                                                      | Safeguard DNA Diagnostic, Inc.                                     | Philippine Genome Center                                                                                                                   | Carita Savolainen-Kopra; Erika Lindh; Haider al-Hello; Jani Halkilaiti; Kirsi Liitsola; Niina Ikonen; Olli Vapalahti; Pekka Elonen; Phuoc Truong; Päivi Laurila; Ravi Kant; Sari Hannula; Soile Blomqvist; Teemu Smura                                                                                                                                                                                                                                                                                                                                                                                                                                                                                                                                                                                                                                                                                                                                                                                   |
| EPI_ISL_5544036,<br>EPI_ISL_5544092,<br>EPI_ISL_5547524,<br>EPI_ISL_5569736                                                                                                                                                                                                                                                                                                                                                                              | San Antonio City of Ilagan Hospital                                | Philippine Genome Center                                                                                                                   | Alethea R. de Guzman; Alyssa Joyce E. Telles; Anna Ong-Lim; Arianne A. Zamora; Benedict A. Maralit; Carlo M. Lapid; Celia Carlos; Cynthia P. Saloma; Devon Ray Pacial; Diomedes A. Cariño; Edsel Maurice Salvana; El King D. Morado; Elcid Aaron R. Pangilinan; Eva Maria Cutiungco-de la Paz; Francis A. Tablizo; Henrietta Marie Rodriguez; Jaime C. Montoya; Jan Michael C. Yap; Jarvin E. Nipales; Jo-Hannah S. Llamas; John Michael Egana; John Q. Wong; Joshua Gregor A. Dizon; Joshua Jose Endozo; Juan Antonio R. Magalang; Karol Sophia Agape R. Padilla; Kenneth M. Kim; Kris P. Punayan; Kristina Patriz Dela Cruz; Lindsay Clare D.L. Carandang; Ma. Exanil Plantig; Marc Edsel C. Ayes; Maria Rosario Singh-Vergeire; Maria Sofia L. Yangzon; Marielle M. Gamboa; Marissa Alejandria; Niña Francesca Bustamante; Razel Nikka M. Hao; Renato Jacinto Q. Mantaring; Rianna Patricia S. Cruz; Shiela Mae M. Araiza; Yvonne Valerie Austria; Zipporah Mariebelle R. Enriquez; Zyrel V. Mollejon |
| EPI_ISL_5051476                                                                                                                                                                                                                                                                                                                                                                                                                                          | San Juan de Dios Educational Foundation Inc.                       | Research Institute for Tropical Medicine                                                                                                   | Allen Anthony Laraño; Catalino Demetria; Francisco Gerardo Polotan; Hannah Leah Morito; Inez Andrea Medado; Jefferson Earl Halog; Lei Lanna Dancel; Leilanie Nacion; Ma. Angelica Tujan                                                                                                                                                                                                                                                                                                                                                                                                                                                                                                                                                                                                                                                                                                                                                                                                                  |
| EPI_ISL_5562963                                                                                                                                                                                                                                                                                                                                                                                                                                          | San Lazaro Hospital (SLH)                                          | Philippine Genome Center                                                                                                                   | Alethea R. de Guzman; Alyssa Joyce E. Telles; Anna Ong-Lim; Arianne A. Zamora; Benedict A. Maralit; Carlo M. Lapid; Celia Carlos; Cynthia P. Saloma; Devon Ray Pacial; Diomedes A. Cariño; Edsel Maurice Salvana; El King D. Morado; Elcid Aaron R. Pangilinan; Eva Maria Cutiungco-de la Paz; Francis A. Tablizo; Henrietta Marie Rodriguez; Jaime C. Montoya; Jan Michael C. Yap; Jarvin E. Nipales; Jo-Hannah S. Llamas; John Michael Egana; John Q. Wong; Joshua Gregor A. Dizon; Joshua Jose Endozo; Juan Antonio R. Magalang; Karol Sophia Agape R. Padilla; Kris P. Punayan; Kristina Patriz Dela Cruz; Lindsay Clare D.L. Carandang; Ma. Exanil Plantig; Marc Edsel C. Ayes; Maria Rosario Singh-Vergeire; Maria Sofia L. Yangzon; Marielle M. Gamboa; Marissa Alejandria; Niña Francesca Bustamante; Razel Nikka M. Hao; Renato Jacinto Q. Mantaring; Rianna Patricia S. Cruz; Shiela Mae M. Araiza; Yvonne Valerie Austria; Zipporah Mariebelle R. Enriquez; Zyrel V. Mollejon                 |
| EPI_ISL_2547346,<br>EPI_ISL_2547347                                                                                                                                                                                                                                                                                                                                                                                                                      | Sanddrift nc Clinic                                                | National Health Laboratory Service/University of Cape Town (NHLS/UCT)                                                                      | Arash Iranzadeh; Bruna Galvao; Carolyn Williamson; Deelan Doolabh; Diana Hardie; Gert Marais; Innocent Mudau; Lynn Tyers; Marvin Hsiao; Stephen Korsman                                                                                                                                                                                                                                                                                                                                                                                                                                                                                                                                                                                                                                                                                                                                                                                                                                                  |
| EPI_ISL_3650611,<br>EPI_ISL_3654244                                                                                                                                                                                                                                                                                                                                                                                                                      | Sanquin B.V.                                                       | Sanquin B.V.                                                                                                                               | Anton van Weert; Karin van Leeuwen; Lianne Koets; Maaike Derlagen; Marco Koppelman; Nadia Keijzer                                                                                                                                                                                                                                                                                                                                                                                                                                                                                                                                                                                                                                                                                                                                                                                                                                                                                                        |
| EPI_ISL_2691237                                                                                                                                                                                                                                                                                                                                                                                                                                          | Santa Clara Valley Medical Center                                  | Santa Clara County Public Health Laboratory                                                                                                | Santa Clara County Public Health Department                                                                                                                                                                                                                                                                                                                                                                                                                                                                                                                                                                                                                                                                                                                                                                                                                                                                                                                                                              |
| EPI_ISL_5524592                                                                                                                                                                                                                                                                                                                                                                                                                                          | Sarah Strauss Clinic Upington                                      | NHLS/UCT                                                                                                                                   | Arash Iranzadeh; Bruna Galvao; Carolyn Williamson; Deelan Doolabh; Diana Hardie; Gert Marais; Innocent Mudau; Lynn Tyers; Marvin Hsiao; Rageema Joseph; Stephen Korsman                                                                                                                                                                                                                                                                                                                                                                                                                                                                                                                                                                                                                                                                                                                                                                                                                                  |
| EPI_ISL_2506982, EPI_ISL_2506984, EPI_ISL_2507560, EPI_ISL_2507564, EPI_ISL_2507565, EPI_ISL_2507956, EPI_ISL_2507958, EPI_ISL_2508343                                                                                                                                                                                                                                                                                                                   | see above                                                          | SataDiag                                                                                                                                   | Expert Microbiology, National Institute for Health and Welfare                                                                                                                                                                                                                                                                                                                                                                                                                                                                                                                                                                                                                                                                                                                                                                                                                                                                                                                                           |
| EPI_ISL_2735860,<br>EPI_ISL_2736453                                                                                                                                                                                                                                                                                                                                                                                                                      | Seattle Flu Study                                                  | Seattle Flu Study                                                                                                                          | Amanda Adler; Barry R. Lutz; Benjamin Pelle; Caitlin R. Wolf; Chris D. Frazar; Deborah A. Nickerson; Elisabeth Brandstetter; Erica Ryke; Helen Y. Chu; Janet A. Englund; Jay Shendure; Jeff Duchin; Jover Lee; Kairsten Fay; Karen Cowgill; Kirsten Lacombe; Lea M. Starita; Mark J. Rieder; Matthew Richardson; Matthew Thompson; Melissa Truong; Michael Boeckh; Michael Famulare; Misja Ilicisin; Peter D. Han; Stephanie Schrag; Thomas R. Sibley; Trevor Bedford                                                                                                                                                                                                                                                                                                                                                                                                                                                                                                                                    |
| EPI_ISL_5800066                                                                                                                                                                                                                                                                                                                                                                                                                                          | Secao Centro De Diagnostico Secedi                                 | Instituto Butantan                                                                                                                         | Antonio Jorge Martins; Claudia Renata dos Santos Barros; David Schlesinger; Debora Botequão Moretti; Dimas Tadeu Covas; Elaine Cristina Marquez; Elaine Vieira Santos; Evandra Strazza Rodrigues; Heidge Fukumasu; Jayme Augusto de Souza-Neto; José Salvatore Leister Patané; Luiz Alcantara; Luiz Lehmann Coutinho; Maria Carolina Elias; Maurício Lacerda Nogueira; Rafael dos Santos Bezerra; Raul Machado Neto; Rejane Maria Tommasini Grotto; Ricardo Haddad; Sandra Coccuzo Sampaio Vessoni; Simone Kashima; Svetoslav Nanev Slavov; Vincent Louis Viala                                                                                                                                                                                                                                                                                                                                                                                                                                          |
| EPI_ISL_5801861,                                                                                                                                                                                                                                                                                                                                                                                                                                         | Secretaria Municipal De Saude                                      | Instituto Butantan                                                                                                                         | Antonio Jorge Martins; Claudia Renata dos Santos Barros; David Schlesinger; Debora Botequão Moretti; Dimas Tadeu Covas; Elaine Cristina Marquez; Elaine Vieira Santos; Evandra Strazza Rodrigues; Heidge Fukumasu; Jayme Augusto de Souza-Neto; José Salvatore Leister Patané; Luiz Alcantara; Luiz                                                                                                                                                                                                                                                                                                                                                                                                                                                                                                                                                                                                                                                                                                      |

|                                                                                                                                                                                                                                                                                                                                                                                                                                                                                                                                                                                                                                                                                                                                                                                                                                                |                                                                                                                                                                                            |                                                                                                                                |                                                                                                                                                                                                                                                                                                                                                                                                                                                                                                                                                                                                                                                                                                                                                                                                                                                                                                                                                                                      |
|------------------------------------------------------------------------------------------------------------------------------------------------------------------------------------------------------------------------------------------------------------------------------------------------------------------------------------------------------------------------------------------------------------------------------------------------------------------------------------------------------------------------------------------------------------------------------------------------------------------------------------------------------------------------------------------------------------------------------------------------------------------------------------------------------------------------------------------------|--------------------------------------------------------------------------------------------------------------------------------------------------------------------------------------------|--------------------------------------------------------------------------------------------------------------------------------|--------------------------------------------------------------------------------------------------------------------------------------------------------------------------------------------------------------------------------------------------------------------------------------------------------------------------------------------------------------------------------------------------------------------------------------------------------------------------------------------------------------------------------------------------------------------------------------------------------------------------------------------------------------------------------------------------------------------------------------------------------------------------------------------------------------------------------------------------------------------------------------------------------------------------------------------------------------------------------------|
| EPI_ISL_5802461,<br>EPI_ISL_5802462                                                                                                                                                                                                                                                                                                                                                                                                                                                                                                                                                                                                                                                                                                                                                                                                            | Sorocaba                                                                                                                                                                                   |                                                                                                                                | Lehmann Coutinho; Maria Carolina Elias; Maurício Lacerda Nogueira; Rafael dos Santos Bezerra; Raul Machado Neto; Rejane Maria Tommasini Grotto; Ricardo Haddad; Sandra Coccuzzo Sampaio Vessoni; Simone Kashima; Svetoslav Nanev Slavov; Vincent Louis Vilaia                                                                                                                                                                                                                                                                                                                                                                                                                                                                                                                                                                                                                                                                                                                        |
| EPI_ISL_2621121                                                                                                                                                                                                                                                                                                                                                                                                                                                                                                                                                                                                                                                                                                                                                                                                                                | Sedgefield Clinic wc SGE                                                                                                                                                                   | NHLS/UCT                                                                                                                       | Arash Iranzadeh; Bruna Galvao; Carolyn Williamson; Deelan Doolabh; Diana Hardie; Gert Marais; Innocent Mudau; Lynn Tyers; Marvin Hsiao; Stephen Korsman                                                                                                                                                                                                                                                                                                                                                                                                                                                                                                                                                                                                                                                                                                                                                                                                                              |
| EPI_ISL_2364038, EPI_ISL_2506400, EPI_ISL_2506401, EPI_ISL_2506406, EPI_ISL_2506755, EPI_ISL_2507952, EPI_ISL_2507982, EPI_ISL_2507983                                                                                                                                                                                                                                                                                                                                                                                                                                                                                                                                                                                                                                                                                                         |                                                                                                                                                                                            |                                                                                                                                |                                                                                                                                                                                                                                                                                                                                                                                                                                                                                                                                                                                                                                                                                                                                                                                                                                                                                                                                                                                      |
| see above                                                                                                                                                                                                                                                                                                                                                                                                                                                                                                                                                                                                                                                                                                                                                                                                                                      | Seinäjoken keskussairaala                                                                                                                                                                  | Expert Microbiology, National Institute for Health and Welfare                                                                 | Carita Savolainen-Kopra; Erika Lindh; Haider al-Hello; Jani Halkkilahti; Kirsi Liitsola; Niina Ikonen; Olli Vapalahti; Pekka Elonen; Phuoc Truong; Päivi Laurila; Ravi Kant; Sari Hannula; Soile Blomqvist; Teemu Smura                                                                                                                                                                                                                                                                                                                                                                                                                                                                                                                                                                                                                                                                                                                                                              |
| EPI_ISL_3071859                                                                                                                                                                                                                                                                                                                                                                                                                                                                                                                                                                                                                                                                                                                                                                                                                                | Selayang Hospital                                                                                                                                                                          | Institute for Medical Research, Infectious Disease Research Centre, National Institutes of Health, Ministry of Health Malaysia | Anasir Mi; Kamel K; Mohd Zawawi Z; Ramiy N; Robert F; Suppiah J; Thayan R                                                                                                                                                                                                                                                                                                                                                                                                                                                                                                                                                                                                                                                                                                                                                                                                                                                                                                            |
| EPI_ISL_4274515                                                                                                                                                                                                                                                                                                                                                                                                                                                                                                                                                                                                                                                                                                                                                                                                                                | Servicio Microbiología H.U. Dr. Negrín                                                                                                                                                     | Servicio Microbiología H.U. Dr. Negrín                                                                                         | Ana Bordes Benitez; Bartolomé Gómez Arroyo; Francisco Javier Chamizo López                                                                                                                                                                                                                                                                                                                                                                                                                                                                                                                                                                                                                                                                                                                                                                                                                                                                                                           |
| EPI_ISL_2510596, EPI_ISL_2934674, EPI_ISL_2934682, EPI_ISL_2934683, EPI_ISL_2934723, EPI_ISL_2934724, EPI_ISL_2934725, EPI_ISL_2934726, EPI_ISL_2934727, EPI_ISL_2934731, EPI_ISL_2934732, EPI_ISL_2934733, EPI_ISL_2934734, EPI_ISL_2934735, EPI_ISL_2934736, EPI_ISL_2934737, EPI_ISL_2934845, EPI_ISL_2934849, EPI_ISL_2934850, EPI_ISL_2934854, EPI_ISL_2934855, EPI_ISL_2934896, EPI_ISL_3265721, EPI_ISL_3265724, EPI_ISL_3265961, EPI_ISL_3265965, EPI_ISL_3265966, EPI_ISL_3265967, EPI_ISL_3265968, EPI_ISL_3265972, EPI_ISL_3265973, EPI_ISL_3265974, EPI_ISL_3265977, EPI_ISL_3265978, EPI_ISL_3265992, EPI_ISL_3266003, EPI_ISL_3266008, EPI_ISL_3266019                                                                                                                                                                           |                                                                                                                                                                                            | Ana Miqueleiz; Ana Navascués; Carmen Expeleta Baquedano                                                                        |                                                                                                                                                                                                                                                                                                                                                                                                                                                                                                                                                                                                                                                                                                                                                                                                                                                                                                                                                                                      |
| see above                                                                                                                                                                                                                                                                                                                                                                                                                                                                                                                                                                                                                                                                                                                                                                                                                                      | Servicio de Microbiología Clínica (Complejo Hospitalario de Navarra, Pamplona)                                                                                                             | Centro de Secuenciación NASERTIC                                                                                               |                                                                                                                                                                                                                                                                                                                                                                                                                                                                                                                                                                                                                                                                                                                                                                                                                                                                                                                                                                                      |
| EPI_ISL_2545403, EPI_ISL_2545404                                                                                                                                                                                                                                                                                                                                                                                                                                                                                                                                                                                                                                                                                                                                                                                                               | Servicio de Microbiología, Laboratori Clinic Metropolitana Nord, Hospital Universitari Germans Trias i Pujol, Institut d'Investigació en Ciències de la Salut Germans Trias i Pujol (IGTP) | SeqCOVID-SPAIN consortium/IBV(CSIC)                                                                                            | Adrián Antuori; Anabel Fernández; Anna Not; Antoni E. Bordoy; Cristina Casañ and SeqCOVID-SPAIN consortium; Elisa Martró; Nona Romani; Verónica Saludes                                                                                                                                                                                                                                                                                                                                                                                                                                                                                                                                                                                                                                                                                                                                                                                                                              |
| EPI_ISL_2776001                                                                                                                                                                                                                                                                                                                                                                                                                                                                                                                                                                                                                                                                                                                                                                                                                                | Servicio de Microbiología, Hospital General Universitario de Castellón                                                                                                                     | SeqCOVID-SPAIN consortium/IBV(CSIC)                                                                                            | Maria Dolores Tirado Balaguer and SeqCOVID-SPAIN consortium; Rosario Moreno Muñoz                                                                                                                                                                                                                                                                                                                                                                                                                                                                                                                                                                                                                                                                                                                                                                                                                                                                                                    |
| EPI_ISL_2438670, EPI_ISL_2438676, EPI_ISL_2491688, EPI_ISL_2600565                                                                                                                                                                                                                                                                                                                                                                                                                                                                                                                                                                                                                                                                                                                                                                             | Servizo de Microbioloxía, Complexo Hospitalario de Santiago de Compostela                                                                                                                  | Servizo de Microbioloxía, Complexo Hospitalario de Santiago de Compostela                                                      | Amparo Coira; Antonio Aguilera; Carlos Garcia_Riestra; Daniel Navarro; Gema Barbeito; Iria Roca; José Llovo; Laura Millán; Manuela Hernández; María Luisa Pérez_del_Molino; Mercedes Treviño; Rocío trastoy; Teresa Lopez_Valiño; Xosé Costa                                                                                                                                                                                                                                                                                                                                                                                                                                                                                                                                                                                                                                                                                                                                         |
| EPI_ISL_4880571                                                                                                                                                                                                                                                                                                                                                                                                                                                                                                                                                                                                                                                                                                                                                                                                                                | Seychelles Public Health Laboratory                                                                                                                                                        | KEMRI-Wellcome Trust Research Programme,Kilifi                                                                                 | Agoti C.; Brigitte Pool; Githinji G.; Jude Gedeon; Lambisia A. Nokes D J.; Leon Biscornet.; Mburu M.W.; Meggy Louange; Mohamed K.S.; Morobe J.; Ndwiwa L. Makori T.; Ochola I.; Onger E.; de Laurent Z.                                                                                                                                                                                                                                                                                                                                                                                                                                                                                                                                                                                                                                                                                                                                                                              |
| EPI_ISL_2567051, EPI_ISL_2567063                                                                                                                                                                                                                                                                                                                                                                                                                                                                                                                                                                                                                                                                                                                                                                                                               | Shamir Medical Center (Asaf Harofe)                                                                                                                                                        | Shamir Medical Center (Asaf Harofe)                                                                                            | Abu Hamad Ramzia; Adina Bar Chaim; Anna Vishnevsky; Chen Weiner; Nir Rainy; Patricia Benveniste-Lekovitz; Reut Sorek Abramovich; Yevgeni Yegorov                                                                                                                                                                                                                                                                                                                                                                                                                                                                                                                                                                                                                                                                                                                                                                                                                                     |
| EPI_ISL_5315385, EPI_ISL_5315412, EPI_ISL_5315422, EPI_ISL_5315426, EPI_ISL_5315511, EPI_ISL_5315513, EPI_ISL_5315514, EPI_ISL_5315516, EPI_ISL_5315526, EPI_ISL_5315532, EPI_ISL_5315543, EPI_ISL_5315876, EPI_ISL_5315893, EPI_ISL_5315894, EPI_ISL_5315915, EPI_ISL_5315922, EPI_ISL_5315970, EPI_ISL_5315995, EPI_ISL_5315998, EPI_ISL_5316015, EPI_ISL_5316160, EPI_ISL_5316203, EPI_ISL_5316227, EPI_ISL_5316312, EPI_ISL_5316317, EPI_ISL_5316318, EPI_ISL_5316329, EPI_ISL_5316380, EPI_ISL_5316391, EPI_ISL_5316431, EPI_ISL_5316436, EPI_ISL_5316464, EPI_ISL_5316477, EPI_ISL_5316515, EPI_ISL_5316529, EPI_ISL_5316537, EPI_ISL_5316586, EPI_ISL_5316592, EPI_ISL_5316598, EPI_ISL_5316620, EPI_ISL_5316621, EPI_ISL_5316634, EPI_ISL_5316644, EPI_ISL_5316659, EPI_ISL_5316668, EPI_ISL_5316697, EPI_ISL_5316708, EPI_ISL_5316716 |                                                                                                                                                                                            | Christie Vermeiren; Finlay Maguire; Kevin Katz; Patryk Aftanas; Robert Kozak; Samira Mubareka                                  |                                                                                                                                                                                                                                                                                                                                                                                                                                                                                                                                                                                                                                                                                                                                                                                                                                                                                                                                                                                      |
| see above                                                                                                                                                                                                                                                                                                                                                                                                                                                                                                                                                                                                                                                                                                                                                                                                                                      | Shared Hospital Laboratory                                                                                                                                                                 | Shared Hospital Laboratory                                                                                                     | Bo Peng; Can Zhu; Jiancheng Chen; Kai Nie; Long Chen; Peihua Niu; Renli Zhang; Shimin Li; Yijun Tang; Zidan Lin and Yaqin He                                                                                                                                                                                                                                                                                                                                                                                                                                                                                                                                                                                                                                                                                                                                                                                                                                                         |
| EPI_ISL_2931278                                                                                                                                                                                                                                                                                                                                                                                                                                                                                                                                                                                                                                                                                                                                                                                                                                | Shenzhen Center for Disease Control and Prevention                                                                                                                                         | National Institute for Viral Disease Control and Prevention, China CDC                                                         |                                                                                                                                                                                                                                                                                                                                                                                                                                                                                                                                                                                                                                                                                                                                                                                                                                                                                                                                                                                      |
| EPI_ISL_5603122, EPI_ISL_5603123                                                                                                                                                                                                                                                                                                                                                                                                                                                                                                                                                                                                                                                                                                                                                                                                               | Siyanda Bakgatla Platinum Mine- Swart Klip                                                                                                                                                 | National Institute for Communicable Diseases of the National Health Laboratory Service                                         | Amoako DG; Bhiman JN; Everatt J.; Ismail A; Mahlangu B; Mnguni A; Mohale T; Ntuli N; Scheepers C                                                                                                                                                                                                                                                                                                                                                                                                                                                                                                                                                                                                                                                                                                                                                                                                                                                                                     |
| EPI_ISL_5477254, EPI_ISL_5477274, EPI_ISL_5477288, EPI_ISL_5477329, EPI_ISL_5477351                                                                                                                                                                                                                                                                                                                                                                                                                                                                                                                                                                                                                                                                                                                                                            | Siyanda Swartklip                                                                                                                                                                          | National Institute for Communicable Diseases of the National Health Laboratory Service                                         | Amoako DG; Bhiman JN; Everatt J.; Ismail A; Mahlangu B; Mnguni A; Mohale T; Ntuli N; Scheepers C                                                                                                                                                                                                                                                                                                                                                                                                                                                                                                                                                                                                                                                                                                                                                                                                                                                                                     |
| EPI_ISL_2388347, EPI_ISL_2388957, EPI_ISL_2470249, EPI_ISL_2470309, EPI_ISL_2632382, EPI_ISL_2761252, EPI_ISL_2761339, EPI_ISL_2762010, EPI_ISL_2762020, EPI_ISL_2762037, EPI_ISL_2762074, EPI_ISL_2762691, EPI_ISL_2845333                                                                                                                                                                                                                                                                                                                                                                                                                                                                                                                                                                                                                    |                                                                                                                                                                                            |                                                                                                                                |                                                                                                                                                                                                                                                                                                                                                                                                                                                                                                                                                                                                                                                                                                                                                                                                                                                                                                                                                                                      |
| see above                                                                                                                                                                                                                                                                                                                                                                                                                                                                                                                                                                                                                                                                                                                                                                                                                                      | Sonic - Bioscientia - MVZ Labor Saar GmbH                                                                                                                                                  | Robert Koch Institute                                                                                                          |                                                                                                                                                                                                                                                                                                                                                                                                                                                                                                                                                                                                                                                                                                                                                                                                                                                                                                                                                                                      |
| EPI_ISL_2845326                                                                                                                                                                                                                                                                                                                                                                                                                                                                                                                                                                                                                                                                                                                                                                                                                                | Sonic - Dr. Staber & Kollegen GmbH München                                                                                                                                                 | Robert Koch Institute                                                                                                          |                                                                                                                                                                                                                                                                                                                                                                                                                                                                                                                                                                                                                                                                                                                                                                                                                                                                                                                                                                                      |
| EPI_ISL_2388665, EPI_ISL_2761601                                                                                                                                                                                                                                                                                                                                                                                                                                                                                                                                                                                                                                                                                                                                                                                                               | Sonic - Labor Dr. von Frreich GmbH                                                                                                                                                         | Robert Koch Institute                                                                                                          |                                                                                                                                                                                                                                                                                                                                                                                                                                                                                                                                                                                                                                                                                                                                                                                                                                                                                                                                                                                      |
| EPI_ISL_2388569                                                                                                                                                                                                                                                                                                                                                                                                                                                                                                                                                                                                                                                                                                                                                                                                                                | Sonic - MVZ Medizinisches Labor Bremen GmbH                                                                                                                                                | Robert Koch Institute                                                                                                          |                                                                                                                                                                                                                                                                                                                                                                                                                                                                                                                                                                                                                                                                                                                                                                                                                                                                                                                                                                                      |
| EPI_ISL_2828016                                                                                                                                                                                                                                                                                                                                                                                                                                                                                                                                                                                                                                                                                                                                                                                                                                | South Eastern Area Laboratory Services (SEALS)                                                                                                                                             | NSW Health Pathology - Institute of Clinical Pathology and Medical Research; Westmead Hospital; University of Sydney           | CIDM-PH et al.                                                                                                                                                                                                                                                                                                                                                                                                                                                                                                                                                                                                                                                                                                                                                                                                                                                                                                                                                                       |
| EPI_ISL_2928013, EPI_ISL_2928019                                                                                                                                                                                                                                                                                                                                                                                                                                                                                                                                                                                                                                                                                                                                                                                                               | South Sudan Ministry of Health, WHO South Sudan, MRC/UVRI & LSHTM Uganda Research Unit                                                                                                     | MRC/UVRI & LSHTM Uganda Research Unit, South Sudan Ministry of Health, WHO South Sudan                                         | Abe G. Abias; Dan Lule Bugembe; Dennis Kenyi Lodiongo; James Ayei; John Rumunu; Joseph Francis Wamala; Juma John HM; Lul Lojok Deng; Matthew Cotten; My V.T. Phan; Pontiano Kaleebu; Richard Lino Loro Lako; Sudhir Bunga                                                                                                                                                                                                                                                                                                                                                                                                                                                                                                                                                                                                                                                                                                                                                            |
| EPI_ISL_4713344, EPI_ISL_4713651, EPI_ISL_4713667, EPI_ISL_5562399, EPI_ISL_5569545, EPI_ISL_5569580, EPI_ISL_5569876, EPI_ISL_5570011                                                                                                                                                                                                                                                                                                                                                                                                                                                                                                                                                                                                                                                                                                         |                                                                                                                                                                                            |                                                                                                                                |                                                                                                                                                                                                                                                                                                                                                                                                                                                                                                                                                                                                                                                                                                                                                                                                                                                                                                                                                                                      |
| see above                                                                                                                                                                                                                                                                                                                                                                                                                                                                                                                                                                                                                                                                                                                                                                                                                                      | South Super Highway Molecular Diagnostic Laboratory                                                                                                                                        | Philippine Genome Center                                                                                                       | Alethea R. de Guzman; Alyssa Joyce E. Telles; Anna Ong-Lim; Arianne A. Zamora; Benedict A. Maralit; Carlo M. Lapid; Celia Carlos; Cynthia P. Saloma; Devon Ray Pacial; Diomedes A. Cariño; Edsel Maurice Salvana; El King D. Morado; Elcid Aaron R. Pangilinan; Eva Maria Cutiungco-de la Paz; Francis A. Tablizo; Henrietta Marie Rodriguez; Jaime C. Montoya; Jan Michael C. Yap; Jarvin E. Nipales; Jo-Hannah S. Llames; John Michael Egana; John Q. Wong; Joshua Gregor A. Dizon; Juan Antonio R. Magalang; Karol Sophia Agape R. Padilla; Kenneth M. Kim; Kris P. Punayan; Kristina Patriz Dela Cruz; Lindsay Clare D.L. Carandang; Ma. Exanil Plantig; Marc Edsel C. Ayes; Maria Rosario Singh-Vergeire; Maria Sofia L. Yangzon; Marielle M. Gamboa; Marissa Alejandria; Niña Francesca Bustamante; Razel Nikka M. Hao; Renato Jacinto Q. Mantaring; Rianna Patricia S. Cruz; Shiela Mae M. Araiza; Yvonne Valerie Austria; Zipporah Mariebelle R. Enriquez; Zyrel V. Mollejon |
| EPI_ISL_5547449, EPI_ISL_5547633, EPI_ISL_5547802, EPI_ISL_5547851                                                                                                                                                                                                                                                                                                                                                                                                                                                                                                                                                                                                                                                                                                                                                                             | Southern Isabela Medical Center Molecular Diagnostic & Research Laboratory (SIMC - MDRL)                                                                                                   | Philippine Genome Center                                                                                                       | Alethea R. de Guzman; Anna Ong-Lim; Arianne A. Zamora; Benedict A. Maralit; Carlo M. Lapid; Celia Carlos; Cynthia P. Saloma; Devon Ray Pacial; Diomedes A. Cariño; Edsel Maurice Salvana; El King D. Morado; Elcid Aaron R. Pangilinan; Eva Maria Cutiungco-de la Paz; Francis A. Tablizo; Henrietta Marie Rodriguez; Jaime C. Montoya; Jan Michael C. Yap; Jarvin E. Nipales; Jo-Hannah S. Llames; John Q. Wong; Joshua Gregor A. Dizon; Juan Antonio R. Magalang; Karol Sophia Agape R. Padilla; Kenneth M. Kim; Kris P. Punayan; Kristina Patriz Dela Cruz; Lindsay Clare D.L. Carandang; Ma. Exanil Plantig; Marc Edsel C. Ayes; Maria Rosario Singh-Vergeire; Maria Sofia L. Yangzon; Marielle M. Gamboa; Marissa Alejandria; Niña Francesca Bustamante; Razel Nikka M. Hao; Renato Jacinto Q. Mantaring; Rianna Patricia S. Cruz; Shiela Mae M. Araiza; Yvonne Valerie Austria; Zipporah Mariebelle R. Enriquez; Zyrel V. Mollejon                                             |
| EPI_ISL_2484882                                                                                                                                                                                                                                                                                                                                                                                                                                                                                                                                                                                                                                                                                                                                                                                                                                | Southern Nevada Public Health Laboratory                                                                                                                                                   | Southern Nevada Public Health Laboratory                                                                                       | Michael Pickler                                                                                                                                                                                                                                                                                                                                                                                                                                                                                                                                                                                                                                                                                                                                                                                                                                                                                                                                                                      |
| EPI_ISL_5542654, EPI_ISL_5542757, EPI_ISL_5542821, EPI_ISL_5542890, EPI_ISL_5542952, EPI_ISL_5543276, EPI_ISL_5543294, EPI_ISL_5543296, EPI_ISL_5543309, EPI_ISL_5562942                                                                                                                                                                                                                                                                                                                                                                                                                                                                                                                                                                                                                                                                       |                                                                                                                                                                                            |                                                                                                                                |                                                                                                                                                                                                                                                                                                                                                                                                                                                                                                                                                                                                                                                                                                                                                                                                                                                                                                                                                                                      |
| see above                                                                                                                                                                                                                                                                                                                                                                                                                                                                                                                                                                                                                                                                                                                                                                                                                                      | Southern Philippines Medical Center (SPMC)                                                                                                                                                 | Philippine Genome Center                                                                                                       | Alethea R. de Guzman; Alyssa Joyce E. Telles; Anna Ong-Lim; Arianne A. Zamora; Benedict A. Maralit; Carlo M. Lapid; Celia Carlos; Cynthia P. Saloma; Devon Ray Pacial; Diomedes A. Cariño; Edsel Maurice Salvana; El King D. Morado; Elcid Aaron R. Pangilinan; Eva Maria Cutiungco-de la Paz; Francis A. Tablizo; Henrietta Marie Rodriguez; Jaime C. Montoya; Jan Michael C. Yap; Jarvin E. Nipales; Jo-Hannah S. Llames; John Michael Egana; John Q. Wong; Joshua Gregor A. Dizon; Juan Antonio R. Magalang; Karol Sophia Agape R. Padilla; Kenneth M. Kim; Kris P. Punayan; Kristina Patriz Dela Cruz; Lindsay Clare D.L. Carandang; Ma. Exanil Plantig; Marc Edsel C. Ayes; Maria Rosario Singh-Vergeire; Maria Sofia L. Yangzon; Marielle M. Gamboa; Marissa Alejandria; Niña Francesca Bustamante; Razel Nikka M. Hao; Renato Jacinto Q. Mantaring; Rianna Patricia S. Cruz; Shiela Mae M. Araiza; Yvonne Valerie Austria; Zipporah Mariebelle R. Enriquez; Zyrel V. Mollejon |
| EPI_ISL_5543968, EPI_ISL_5544011, EPI_ISL_5544040, EPI_ISL_5544066, EPI_ISL_5544086, EPI_ISL_5544105, EPI_ISL_5547597, EPI_ISL_5547794, EPI_ISL_5547940                                                                                                                                                                                                                                                                                                                                                                                                                                                                                                                                                                                                                                                                                        |                                                                                                                                                                                            |                                                                                                                                |                                                                                                                                                                                                                                                                                                                                                                                                                                                                                                                                                                                                                                                                                                                                                                                                                                                                                                                                                                                      |
| see above                                                                                                                                                                                                                                                                                                                                                                                                                                                                                                                                                                                                                                                                                                                                                                                                                                      | Southern Philippines Medical Center (SPMC-SNL-MBL)                                                                                                                                         | Philippine Genome Center                                                                                                       | Alethea R. de Guzman; Anna Ong-Lim; Arianne A. Zamora; Benedict A. Maralit; Carlo M. Lapid; Celia Carlos; Cynthia P. Saloma; Devon Ray Pacial; Diomedes A. Cariño; Edsel Maurice Salvana; El King D. Morado; Elcid Aaron R. Pangilinan; Eva Maria Cutiungco-de la Paz; Francis A. Tablizo; Henrietta Marie Rodriguez; Jaime C. Montoya; Jan Michael C. Yap; Jarvin E. Nipales; Jo-Hannah S. Llames; John Michael Egana; John Q. Wong; Joshua Gregor A. Dizon; Juan Antonio R. Magalang; Karol Sophia Agape R. Padilla; Kenneth M. Kim; Kris P. Punayan; Kristina Patriz Dela Cruz; Lindsay Clare D.L. Carandang; Ma. Exanil Plantig; Marc Edsel C. Ayes; Maria Rosario Singh-Vergeire; Maria Sofia L. Yangzon; Marielle M. Gamboa; Marissa Alejandria; Niña Francesca Bustamante; Razel Nikka M. Hao; Renato Jacinto Q. Mantaring; Rianna Patricia S. Cruz; Shiela Mae M. Araiza; Yvonne Valerie Austria; Zipporah Mariebelle R. Enriquez; Zyrel V. Mollejon                         |
| EPI_ISL_4717318, EPI_ISL_4742192, EPI_ISL_4742225, EPI_ISL_5537915, EPI_ISL_5538231, EPI_ISL_5542723, EPI_ISL_5542838                                                                                                                                                                                                                                                                                                                                                                                                                                                                                                                                                                                                                                                                                                                          |                                                                                                                                                                                            |                                                                                                                                |                                                                                                                                                                                                                                                                                                                                                                                                                                                                                                                                                                                                                                                                                                                                                                                                                                                                                                                                                                                      |
| see above                                                                                                                                                                                                                                                                                                                                                                                                                                                                                                                                                                                                                                                                                                                                                                                                                                      | St. Luke's Medical Center - BGC (HB)                                                                                                                                                       | Philippine Genome Center                                                                                                       | Alethea R. de Guzman; Anna Ong-Lim; Arianne A. Zamora; Benedict A. Maralit; Carlo M. Lapid; Celia Carlos; Cynthia P. Saloma; Devon Ray Pacial; Diomedes A. Cariño; Edsel Maurice Salvana; El King D. Morado; Elcid Aaron R. Pangilinan; Eva Maria Cutiungco-de la Paz; Francis A. Tablizo; Henrietta Marie Rodriguez; Jaime C. Montoya; Jan Michael C. Yap; Jarvin E. Nipales; Jo-Hannah S. Llames; John Michael Egana; John Q. Wong; Joshua Gregor A. Dizon; Juan Antonio R. Magalang; Karol Sophia Agape R. Padilla; Kenneth M. Kim; Kris P. Punayan; Kristina Patriz Dela Cruz; Lindsay Clare D.L. Carandang; Ma. Exanil Plantig; Marc Edsel C. Ayes; Maria Rosario Singh-Vergeire; Maria Sofia L. Yangzon; Marielle M. Gamboa; Marissa Alejandria; Niña Francesca Bustamante; Razel Nikka M. Hao; Renato Jacinto Q. Mantaring; Rianna Patricia S. Cruz; Shiela Mae M. Araiza; Yvonne Valerie Austria; Zipporah Mariebelle R. Enriquez; Zyrel V. Mollejon                         |
| EPI_ISL_5570268                                                                                                                                                                                                                                                                                                                                                                                                                                                                                                                                                                                                                                                                                                                                                                                                                                | St. Luke's Medical Center- QC                                                                                                                                                              | Philippine Genome Center                                                                                                       | Alethea R. de Guzman; Alyssa Joyce E. Telles; Anna Ong-Lim; Arianne A. Zamora; Benedict A. Maralit; Carlo M. Lapid; Celia Carlos; Cynthia P. Saloma; Devon Ray Pacial; Diomedes A. Cariño; Edsel Maurice Salvana; El King D. Morado; Elcid Aaron R. Pangilinan; Eva Maria Cutiungco-de la Paz; Francis A. Tablizo; Henrietta Marie Rodriguez; Jaime C. Montoya; Jan Michael C. Yap; Jarvin E. Nipales; Jo-Hannah S. Llames; John Michael Egana; John Q. Wong; Joshua Gregor A. Dizon; Juan Antonio R. Magalang; Karol Sophia Agape R. Padilla; Kenneth M. Kim; Kris P. Punayan; Kristina Patriz Dela Cruz; Lindsay Clare D.L. Carandang; Ma. Exanil Plantig; Marc Edsel C. Ayes; Maria Rosario Singh-Vergeire; Maria Sofia L. Yangzon; Marielle M. Gamboa; Marissa Alejandria; Niña Francesca Bustamante; Razel Nikka M. Hao; Renato Jacinto Q. Mantaring; Rianna Patricia S. Cruz; Shiela Mae M. Araiza; Yvonne Valerie Austria; Zipporah Mariebelle R. Enriquez; Zyrel V. Mollejon |
| EPI_ISL_2859978, EPI_ISL_2859999, EPI_ISL_4714887, EPI_ISL_4715109, EPI_ISL_4715190, EPI_ISL_4741508, EPI_ISL_5541433, EPI_ISL_5569306                                                                                                                                                                                                                                                                                                                                                                                                                                                                                                                                                                                                                                                                                                         |                                                                                                                                                                                            |                                                                                                                                |                                                                                                                                                                                                                                                                                                                                                                                                                                                                                                                                                                                                                                                                                                                                                                                                                                                                                                                                                                                      |
| see above                                                                                                                                                                                                                                                                                                                                                                                                                                                                                                                                                                                                                                                                                                                                                                                                                                      | Sta. Ana Hospital                                                                                                                                                                          | Philippine Genome Center                                                                                                       | Alethea R. de Guzman; Alyssa Joyce E. Telles; Anna Ong-Lim; Arianne A. Zamora; Benedict A. Maralit; Carlo M. Lapid; Celia Carlos; Cynthia P. Saloma; Devon Ray Pacial; Diomedes A. Carino; Diomedes A. Cariño; Edsel Maurice Salvana; Edsel Maurice Salvana; El King D. Morado; Elcid Aaron R. Pangilinan; Eva Maria Cutiungco-de la Paz; Francis A. Tablizo; Henrietta Marie Rodriguez; Jaime C. Montoya; Jan Michael C. Yap; Jarvin E. Nipales; Jo-Hannah S. Llames; John Michael Egana; John Q. Wong; Joshua Gregor A. Dizon; Juan Antonio R. Magalang; Karol Sophia Agape R.                                                                                                                                                                                                                                                                                                                                                                                                     |



|                                                                                                                                                                                                                                                                                                                                                                                                                                                                                                                                                                                                                                                                                                                                                                                                                                                                                                                                                                                                                                                                                                                                |                                                             |                                                                                                                                |                                                                                                                                                                                                                                                                                                                                                                                                                                                                                                                                                                                                                                                                                                                                                                                                                                                                                                                                                                                                                                      |
|--------------------------------------------------------------------------------------------------------------------------------------------------------------------------------------------------------------------------------------------------------------------------------------------------------------------------------------------------------------------------------------------------------------------------------------------------------------------------------------------------------------------------------------------------------------------------------------------------------------------------------------------------------------------------------------------------------------------------------------------------------------------------------------------------------------------------------------------------------------------------------------------------------------------------------------------------------------------------------------------------------------------------------------------------------------------------------------------------------------------------------|-------------------------------------------------------------|--------------------------------------------------------------------------------------------------------------------------------|--------------------------------------------------------------------------------------------------------------------------------------------------------------------------------------------------------------------------------------------------------------------------------------------------------------------------------------------------------------------------------------------------------------------------------------------------------------------------------------------------------------------------------------------------------------------------------------------------------------------------------------------------------------------------------------------------------------------------------------------------------------------------------------------------------------------------------------------------------------------------------------------------------------------------------------------------------------------------------------------------------------------------------------|
| EPI_ISL_2545909                                                                                                                                                                                                                                                                                                                                                                                                                                                                                                                                                                                                                                                                                                                                                                                                                                                                                                                                                                                                                                                                                                                | Synlab Eesti OÜ                                             | 1. Laboratory of Communicable Diseases (Estonia); 2. Eurofins Genomics Europe Sequencing GmbH                                  | Lidia Dotsenko et al.                                                                                                                                                                                                                                                                                                                                                                                                                                                                                                                                                                                                                                                                                                                                                                                                                                                                                                                                                                                                                |
| EPI_ISL_2386311                                                                                                                                                                                                                                                                                                                                                                                                                                                                                                                                                                                                                                                                                                                                                                                                                                                                                                                                                                                                                                                                                                                | Synlab MVZ Augsburg                                         | Robert Koch Institute                                                                                                          |                                                                                                                                                                                                                                                                                                                                                                                                                                                                                                                                                                                                                                                                                                                                                                                                                                                                                                                                                                                                                                      |
| EPI_ISL_2898431, EPI_ISL_2899393                                                                                                                                                                                                                                                                                                                                                                                                                                                                                                                                                                                                                                                                                                                                                                                                                                                                                                                                                                                                                                                                                               | Synlab Medialab                                             | Karolinska University Hospital                                                                                                 | Annelie Bjerkner; Isak Sylvin; Jan Albert; Karolina Ininbergs; Lina Guerra Blomqvist; Lynda Eneh; Martin Ekman; Martina Wahlund; Robert Dyrdak; Sandra Broddesson; Tanja Normark; Tobias Allander; Valterri Wirta; Zhibing Yun                                                                                                                                                                                                                                                                                                                                                                                                                                                                                                                                                                                                                                                                                                                                                                                                       |
| EPI_ISL_2694612, EPI_ISL_2694618, EPI_ISL_2694620, EPI_ISL_2694625, EPI_ISL_2694682, EPI_ISL_2694695, EPI_ISL_2694703, EPI_ISL_2694707, EPI_ISL_2694712, EPI_ISL_2694717, EPI_ISL_2694720, EPI_ISL_2694721, EPI_ISL_2694722, EPI_ISL_2695504, EPI_ISL_2695509, EPI_ISL_2695511, EPI_ISL_2695528                                                                                                                                                                                                                                                                                                                                                                                                                                                                                                                                                                                                                                                                                                                                                                                                                                | see above                                                   | TAMBO MEMORIAL                                                                                                                 | National Institute for Communicable Diseases of the National Health Laboratory Service<br>Amoako DG; Bhiman JN; Everatt J; Ismail A; Mahlangu B; Mnguni A; Mohale T; Ntuli N; Scheepers C                                                                                                                                                                                                                                                                                                                                                                                                                                                                                                                                                                                                                                                                                                                                                                                                                                            |
| EPI_ISL_2662556, EPI_ISL_2662560, EPI_ISL_2662570, EPI_ISL_2662572, EPI_ISL_2662575, EPI_ISL_2662577, EPI_ISL_2662579, EPI_ISL_2662580, EPI_ISL_2662581, EPI_ISL_2662584, EPI_ISL_2662587, EPI_ISL_2662592, EPI_ISL_2662594, EPI_ISL_2662601, EPI_ISL_2662602, EPI_ISL_2662603, EPI_ISL_2662608, EPI_ISL_2662610, EPI_ISL_2662612, EPI_ISL_2662614, EPI_ISL_2662615, EPI_ISL_2709953, EPI_ISL_2709957, EPI_ISL_2709960, EPI_ISL_2709979, EPI_ISL_2709982, EPI_ISL_2709987, EPI_ISL_2709988, EPI_ISL_2827038, EPI_ISL_2827039, EPI_ISL_2827041, EPI_ISL_2827050, EPI_ISL_2827052, EPI_ISL_2827055, EPI_ISL_2827056, EPI_ISL_2827057, EPI_ISL_2827058, EPI_ISL_2827060, EPI_ISL_2827063, EPI_ISL_2827068, EPI_ISL_2827144, EPI_ISL_2827148, EPI_ISL_2827152, EPI_ISL_2827153, EPI_ISL_2827154                                                                                                                                                                                                                                                                                                                                    | see above                                                   | TAMBO MEMORIAL LABORATORY                                                                                                      | National Institute for Communicable Diseases of the National Health Laboratory Service<br>Amoako DG; Bhiman JN; Everatt J; Ismail A; Mahlangu B; Mnguni A; Mohale T; Ntuli N; Scheepers C                                                                                                                                                                                                                                                                                                                                                                                                                                                                                                                                                                                                                                                                                                                                                                                                                                            |
| EPI_ISL_3326301, EPI_ISL_3326704                                                                                                                                                                                                                                                                                                                                                                                                                                                                                                                                                                                                                                                                                                                                                                                                                                                                                                                                                                                                                                                                                               | TGen North                                                  | TGen North                                                                                                                     | Brett Van Tassel; Chris French; Darrin Lemmer; Dave Engenthaler; Hayley Yaglom; Heather Centner; Jolene Bowers                                                                                                                                                                                                                                                                                                                                                                                                                                                                                                                                                                                                                                                                                                                                                                                                                                                                                                                       |
| EPI_ISL_4713501                                                                                                                                                                                                                                                                                                                                                                                                                                                                                                                                                                                                                                                                                                                                                                                                                                                                                                                                                                                                                                                                                                                | THE LORD'S GRACE MEDICAL AND INDUSTRIAL CLINIC              | Philippine Genome Center                                                                                                       | Alethea R. de Guzman; Anna Ong-Lim; Arianne A. Zamora; Benedict A. Maralit; Carlo M. Lapid; Celia Carlos; Cynthia P. Saloma; Devon Ray Pacial; Diomedes A. Cariño; Edsel Maurice Salvana; El King D. Morado; Elcid Aaron R. Pangilinan; Eva Maria Cutiongco-de la Paz; Francis A. Tablizo; Henrietta Marie Rodriguez; Jaime C. Montoya; Jan Michael C. Yap; Jarvin E. Nipales; Jo-Hannah S. Llames; John Q. Wong; Joshua Gregor A. Dizon; Juan Antonio R. Magalang; Karol Sophia Agape R. Padilla; Kenneth M. Kim; Kris P. Punayan; Kristina Patriz Dela Cruz; Lindsay Clare D.L. Carandang; Ma. Exanil Plantig; Marc Edsel C. Ayes; Maria Rosario Singh-Vergeire; Maria Sofia L. Yangzon; Marielle M. Gamboa; Marissa Alejandria; Niña Francesca Bustamante; Razel Nikka M. Hao; Renato Jacinto Q. Mantaring; Rianna Patricia S. Cruz; Shiela Mae M. Araiza; Yvonne Valerie Austria; Zipporah Mariebelle R. Enriquez; Zryel V. Mollejon                                                                                             |
| EPI_ISL_4459375                                                                                                                                                                                                                                                                                                                                                                                                                                                                                                                                                                                                                                                                                                                                                                                                                                                                                                                                                                                                                                                                                                                | THE PREMIER MEDICAL CENTER                                  | Research Institute for Tropical Medicine/Tohoku University                                                                     | Allen Anthony Laraño; Ardiانة Isabelle Dolor; Catalino Demetria; Clyde Dapaz; Emmanuel Kagning Tsinda; Francisco Gerardo Polotan; Hitoshi Oshitan; Inez Andrea Medado; Jefferson Earl Halog; Lei Lanna Dancel; Leilanie Nacion; Ma. Angelica Tujan; Machiko Okamoto; Maria Carmen Corpuz; Mariko Siato-Obata; Mayuko Saito                                                                                                                                                                                                                                                                                                                                                                                                                                                                                                                                                                                                                                                                                                           |
| EPI_ISL_3800424                                                                                                                                                                                                                                                                                                                                                                                                                                                                                                                                                                                                                                                                                                                                                                                                                                                                                                                                                                                                                                                                                                                | TN Division of Laboratory Services                          | Centers for Disease Control and Prevention Division of Viral Diseases, Pathogen Discovery                                      | Alex Burgin; Ben Rambo-Martin; Clinton Paden; Dakota Howard; Dave Wentworth; Dhvani Batra; Jasmine Padilla; Justin Lee; Krista Queen; Kristen Knipe; Kristine Lacey; Mark Burroughs; Matthew Schmeer; Meghan Bentz; Mili Sheth; Peter Cook; Sam Shepard; Sarah Nobles; Suxiang Tong; Vivien Dugan; Yvette Unoarumhi                                                                                                                                                                                                                                                                                                                                                                                                                                                                                                                                                                                                                                                                                                                  |
| EPI_ISL_2693000, EPI_ISL_2693004                                                                                                                                                                                                                                                                                                                                                                                                                                                                                                                                                                                                                                                                                                                                                                                                                                                                                                                                                                                                                                                                                               | TSGH-CP molecular lab                                       | TSGH-CP molecular lab                                                                                                          | Cheng-Lih Perng; Chien-Wen Chen; Chih-Kai Chang; Feng-Yee Chang; Hsing-Yi Chung; Hung-Sheng Shang; Jung-Chung Lin; Kuo-Ming Yeh; Kuo-Sheng Hung; Ming-Jr JIAN; Sheng-Kang Chiu; Shih-Hung Tsai; Tien-Yao Chang                                                                                                                                                                                                                                                                                                                                                                                                                                                                                                                                                                                                                                                                                                                                                                                                                       |
| EPI_ISL_2987321                                                                                                                                                                                                                                                                                                                                                                                                                                                                                                                                                                                                                                                                                                                                                                                                                                                                                                                                                                                                                                                                                                                | TSHEPONG LABORATORY                                         | National Institute for Communicable Diseases of the National Health Laboratory Service                                         | Amoako DG; Bhiman JN; Everatt J; Ismail A; Mahlangu B; Mnguni A; Mohale T; Ntuli N; Scheepers C                                                                                                                                                                                                                                                                                                                                                                                                                                                                                                                                                                                                                                                                                                                                                                                                                                                                                                                                      |
| EPI_ISL_2827908, EPI_ISL_3073969, EPI_ISL_3073978, EPI_ISL_3073982, EPI_ISL_3073988, EPI_ISL_3342177, EPI_ISL_4253715, EPI_ISL_4253719, EPI_ISL_4253741, EPI_ISL_6201896, EPI_ISL_6201909                                                                                                                                                                                                                                                                                                                                                                                                                                                                                                                                                                                                                                                                                                                                                                                                                                                                                                                                      | see above                                                   | TSHEPONG LABORATORY                                                                                                            | National Institute for Communicable Diseases of the National Health Laboratory Service<br>Amoako DG; Bhiman JN; Everatt J; Ismail A; Mahlangu B; Mnguni A; Mohale T; Ntuli N; Scheepers C                                                                                                                                                                                                                                                                                                                                                                                                                                                                                                                                                                                                                                                                                                                                                                                                                                            |
| EPI_ISL_2713000, EPI_ISL_4009152                                                                                                                                                                                                                                                                                                                                                                                                                                                                                                                                                                                                                                                                                                                                                                                                                                                                                                                                                                                                                                                                                               | TXDSSH                                                      | TXDSSH                                                                                                                         | Anita Pokharel; Bonnie Oh; Chun Wang; Grace Kubin; Jenny Zhang; Karen Bobier; Lorraine Rodriguez; Maliha Rahman; Mayela Pedrueza; Myong Koag; Rachel Lee; Rashmi Tuladhar                                                                                                                                                                                                                                                                                                                                                                                                                                                                                                                                                                                                                                                                                                                                                                                                                                                            |
| EPI_ISL_2364014, EPI_ISL_2505213, EPI_ISL_2505874, EPI_ISL_2505907, EPI_ISL_2506164, EPI_ISL_2506173, EPI_ISL_2506431, EPI_ISL_2506513, EPI_ISL_2506516, EPI_ISL_2506518, EPI_ISL_2506519, EPI_ISL_2506520, EPI_ISL_2506527, EPI_ISL_2506582, EPI_ISL_2506807, EPI_ISL_2506809, EPI_ISL_2506810, EPI_ISL_2506816, EPI_ISL_2506817, EPI_ISL_2506858, EPI_ISL_2506868, EPI_ISL_2506869, EPI_ISL_2506871, EPI_ISL_2506872, EPI_ISL_2506873, EPI_ISL_2506874, EPI_ISL_2506876, EPI_ISL_2506881, EPI_ISL_2506882, EPI_ISL_2506883, EPI_ISL_2506885, EPI_ISL_2506889, EPI_ISL_2506893, EPI_ISL_2506896, EPI_ISL_2506907, EPI_ISL_2506908, EPI_ISL_2506910, EPI_ISL_2506915, EPI_ISL_2506916, EPI_ISL_2506917, EPI_ISL_2506922, EPI_ISL_2507005, EPI_ISL_2507008, EPI_ISL_2507010, EPI_ISL_2507014, EPI_ISL_2507029, EPI_ISL_2507035, EPI_ISL_2507037, EPI_ISL_2507040, EPI_ISL_2507069, EPI_ISL_2507628, EPI_ISL_2507721, EPI_ISL_2507783, EPI_ISL_2507805, EPI_ISL_2508178, EPI_ISL_2508180, EPI_ISL_2508338, EPI_ISL_2591301                                                                                                       | see above                                                   | TYKS, Kliininen mikrobiologia                                                                                                  | Expert Microbiology, National Institute for Health and Welfare<br>Carita Savolainen-Kopra; Erika Lindh; Haider al-Hello; Jani Halkitala; Kirsi Liitsola; Niina Ikonen; Olli Vapalahti; Pekka Elonen; Phuoc Truong; Päivi Laurila; Ravi Kant; Sari Hannula; Soile Blomqvist; Teemu Smura                                                                                                                                                                                                                                                                                                                                                                                                                                                                                                                                                                                                                                                                                                                                              |
| EPI_ISL_5051477                                                                                                                                                                                                                                                                                                                                                                                                                                                                                                                                                                                                                                                                                                                                                                                                                                                                                                                                                                                                                                                                                                                | Taguig-Pateros District Hospital                            | Research Institute for Tropical Medicine                                                                                       | Allen Anthony Laraño; Catalino Demetria; Francisco Gerardo Polotan; Hannah Leah Morito; Inez Andrea Medado; Jefferson Earl Halog; Lei Lanna Dancel; Leilanie Nacion; Ma. Angelica Tujan                                                                                                                                                                                                                                                                                                                                                                                                                                                                                                                                                                                                                                                                                                                                                                                                                                              |
| EPI_ISL_5918085                                                                                                                                                                                                                                                                                                                                                                                                                                                                                                                                                                                                                                                                                                                                                                                                                                                                                                                                                                                                                                                                                                                | Tambo Memorial Laboratory                                   | National Institute for Communicable Diseases of the National Health Laboratory Service                                         | Amoako DG; Bhiman JN; Everatt J; Ismail A; Mahlangu B; Mnguni A; Mohale T; Ntuli N; Scheepers C                                                                                                                                                                                                                                                                                                                                                                                                                                                                                                                                                                                                                                                                                                                                                                                                                                                                                                                                      |
| EPI_ISL_2383119                                                                                                                                                                                                                                                                                                                                                                                                                                                                                                                                                                                                                                                                                                                                                                                                                                                                                                                                                                                                                                                                                                                | Tampa General Hospital Esoteric Lab                         | Tampa General Hospital Esoteric Research & Development Lab                                                                     | Amorce Lima; Deanna Becker; Dominic Uy; Grant Vestal; Suzanne Silbert; Vicki Healer                                                                                                                                                                                                                                                                                                                                                                                                                                                                                                                                                                                                                                                                                                                                                                                                                                                                                                                                                  |
| EPI_ISL_5569751                                                                                                                                                                                                                                                                                                                                                                                                                                                                                                                                                                                                                                                                                                                                                                                                                                                                                                                                                                                                                                                                                                                | Tarlac Provincial Hospital - Molecular Pathology Laboratory | Philippine Genome Center                                                                                                       | Alethea R. de Guzman; Alyssa Joyce E. Telles; Anna Ong-Lim; Arianne A. Zamora; Benedict A. Maralit; Carlo M. Lapid; Celia Carlos; Cynthia P. Saloma; Devon Ray Pacial; Diomedes A. Cariño; Edsel Maurice Salvana; El King D. Morado; Elcid Aaron R. Pangilinan; Eva Maria Cutiongco-de la Paz; Francis A. Tablizo; Henrietta Marie Rodriguez; Jaime C. Montoya; Jan Michael C. Yap; Jarvin E. Nipales; Jo-Hannah S. Llames; John Michael Egana; John Q. Wong; Joshua Jose Endozo; Juan Antonio R. Magalang; Karol Sophia Agape R. Padilla; Kris P. Punayan; Kristina Patriz Dela Cruz; Lindsay Clare D.L. Carandang; Ma. Exanil Plantig; Marc Edsel C. Ayes; Maria Rosario Singh-Vergeire; Maria Sofia L. Yangzon; Marielle M. Gamboa; Marissa Alejandria; Niña Francesca Bustamante; Razel Nikka M. Hao; Renato Jacinto Q. Mantaring; Rianna Patricia S. Cruz; Shiela Mae M. Araiza; Yvonne Valerie Austria; Zipporah Mariebelle R. Enriquez; Zryel V. Mollejon                                                                     |
| EPI_ISL_2484762, EPI_ISL_2484764, EPI_ISL_2484765, EPI_ISL_2484766, EPI_ISL_2484767, EPI_ISL_2484769, EPI_ISL_2484771, EPI_ISL_2484776, EPI_ISL_2484787, EPI_ISL_2484789, EPI_ISL_2600353, EPI_ISL_2600360, EPI_ISL_2651123                                                                                                                                                                                                                                                                                                                                                                                                                                                                                                                                                                                                                                                                                                                                                                                                                                                                                                    | see above                                                   | Temporary Specimen Collection Centre at the AsiaWorld-Expo                                                                     | Hong Kong Department of Health<br>Alan K.L. Tsang; Dominic N.C. Tsang; Edman T.K. Lam; Gannon C.K. Mak; Ken H.L. Ng; Peter C.W. Yip; Peter K.C. Cheng; Rickjason C.W. Chan                                                                                                                                                                                                                                                                                                                                                                                                                                                                                                                                                                                                                                                                                                                                                                                                                                                           |
| EPI_ISL_5114317, EPI_ISL_5114619                                                                                                                                                                                                                                                                                                                                                                                                                                                                                                                                                                                                                                                                                                                                                                                                                                                                                                                                                                                                                                                                                               | Tengku Ampuan Afzan Hospital                                | Institute for Medical Research, Infectious Disease Research Centre, National Institutes of Health, Ministry of Health Malaysia | Ahmad FA; Ahmad Fazilah NA; Anasir MI; Azizan MA; Kamel K; Mohd Zawawi Z; Norhisham SN; Ramly N; Robert F; Suppiah J; Thayan R                                                                                                                                                                                                                                                                                                                                                                                                                                                                                                                                                                                                                                                                                                                                                                                                                                                                                                       |
| EPI_ISL_2811959                                                                                                                                                                                                                                                                                                                                                                                                                                                                                                                                                                                                                                                                                                                                                                                                                                                                                                                                                                                                                                                                                                                | Tengku Ampuan Afzan Hospital (HTAA)                         | Institute for Medical Research, Infectious Disease Research Centre, National Institutes of Health, Ministry of Health Malaysia | Azizan MA; Kamel K; Mohd Zawawi Z; Ramly N; Robert F; Suppiah J; Thayan R                                                                                                                                                                                                                                                                                                                                                                                                                                                                                                                                                                                                                                                                                                                                                                                                                                                                                                                                                            |
| EPI_ISL_2921997                                                                                                                                                                                                                                                                                                                                                                                                                                                                                                                                                                                                                                                                                                                                                                                                                                                                                                                                                                                                                                                                                                                | Tengku Ampuan Rahimah Hospital                              | Institute for Medical Research, Infectious Disease Research Centre, National Institutes of Health, Ministry of Health Malaysia | Anasir MI; Azizan MA; Kamel K; Mohd Zawawi Z; Ramly N; Robert F; Suppiah J; Thayan R                                                                                                                                                                                                                                                                                                                                                                                                                                                                                                                                                                                                                                                                                                                                                                                                                                                                                                                                                 |
| EPI_ISL_2921260, EPI_ISL_2921261                                                                                                                                                                                                                                                                                                                                                                                                                                                                                                                                                                                                                                                                                                                                                                                                                                                                                                                                                                                                                                                                                               | Terengganu State Health Department                          | Institute for Medical Research, Infectious Disease Research Centre, National Institutes of Health, Ministry of Health Malaysia | Anasir MI; Azizan MA; Kamel K; Mohd Zawawi Z; Ramly N; Robert F; Suppiah J; Thayan R                                                                                                                                                                                                                                                                                                                                                                                                                                                                                                                                                                                                                                                                                                                                                                                                                                                                                                                                                 |
| EPI_ISL_5552503                                                                                                                                                                                                                                                                                                                                                                                                                                                                                                                                                                                                                                                                                                                                                                                                                                                                                                                                                                                                                                                                                                                | Teresita Jalandoni Provincial Hospital                      | Philippine Genome Center                                                                                                       | Alethea R. de Guzman; Alyssa Joyce E. Telles; Anna Ong-Lim; Arianne A. Zamora; Benedict A. Maralit; Carlo M. Lapid; Celia Carlos; Cynthia P. Saloma; Devon Ray Pacial; Diomedes A. Cariño; Edsel Maurice Salvana; El King D. Morado; Elcid Aaron R. Pangilinan; Eva Maria Cutiongco-de la Paz; Francis A. Tablizo; Henrietta Marie Rodriguez; Jaime C. Montoya; Jan Michael C. Yap; Jarvin E. Nipales; Jo-Hannah S. Llames; John Michael Egana; John Q. Wong; Joshua Gregor A. Dizon; Joshua Jose Endozo; Juan Antonio R. Magalang; Karol Sophia Agape R. Padilla; Kenneth M. Kim; Kris P. Punayan; Kristina Patriz Dela Cruz; Lindsay Clare D.L. Carandang; Ma. Exanil Plantig; Marc Edsel C. Ayes; Maria Rosario Singh-Vergeire; Maria Sofia L. Yangzon; Marielle M. Gamboa; Marissa Alejandria; Niña Francesca Bustamante; Razel Nikka M. Hao; Renato Jacinto Q. Mantaring; Rianna Patricia S. Cruz; Shiela Mae M. Araiza; Yvonne Valerie Austria; Zipporah Mariebelle R. Enriquez; Zryel V. Mollejon                             |
| EPI_ISL_2377702                                                                                                                                                                                                                                                                                                                                                                                                                                                                                                                                                                                                                                                                                                                                                                                                                                                                                                                                                                                                                                                                                                                | Texas Department of State Health Services (TXDSSH)          | Texas Department of State Health Services (TXDSSH)                                                                             | Anita Pokharel; Bonnie Oh; Chun Wang; Grace Kubin; Jenny Zhang; Karen Bobier; Lorraine Rodriguez; Maliha Rahman; Mayela Pedrueza; Myong Koag; Rachel Lee; Rashmi Tuladhar                                                                                                                                                                                                                                                                                                                                                                                                                                                                                                                                                                                                                                                                                                                                                                                                                                                            |
| EPI_ISL_4714939, EPI_ISL_4716638, EPI_ISL_5562746, EPI_ISL_5568892, EPI_ISL_5569064                                                                                                                                                                                                                                                                                                                                                                                                                                                                                                                                                                                                                                                                                                                                                                                                                                                                                                                                                                                                                                            | The Lord's Grace Medical and Industrial Clinic              | Philippine Genome Center                                                                                                       | Alethea R. de Guzman; Alyssa Joyce E. Telles; Anna Ong-Lim; Arianne A. Zamora; Benedict A. Maralit; Carlo M. Lapid; Celia Carlos; Cynthia P. Saloma; Devon Ray Pacial; Diomedes A. Cariño; Edsel Maurice Salvana; El King D. Morado; Elcid Aaron R. Pangilinan; Eva Maria Cutiongco-de la Paz; Francis A. Tablizo; Henrietta Marie Rodriguez; Jaime C. Montoya; Jan Michael C. Yap; Jarvin E. Nipales; Jo-Hannah S. Llames; John Michael Egana; John Q. Wong; Joshua Gregor A. Dizon; Joshua Jose Endozo; Juan Antonio R. Magalang; Karol Sophia Agape R. Padilla; Kenneth M. Kim; Kris P. Punayan; Kristina Patriz Dela Cruz; Lindsay Clare D.L. Carandang; Ma. Exanil Plantig; Marc Edsel C. Ayes; Maria Rosario Singh-Vergeire; Maria Sofia L. Yangzon; Marielle M. Gamboa; Marissa Alejandria; Niña Francesca Bustamante; Razel Nikka M. Hao; Renato Jacinto Q. Mantaring; Rianna Patricia S. Cruz; Shiela Mae M. Araiza; Yvonne Valerie Austria; Zipporah Mariebelle R. Enriquez; Zryel V. Mollejon                             |
| EPI_ISL_2859960, EPI_ISL_2859967, EPI_ISL_2859972, EPI_ISL_2859976, EPI_ISL_2859983, EPI_ISL_2859989, EPI_ISL_2859991, EPI_ISL_2859993, EPI_ISL_2860003, EPI_ISL_2860004, EPI_ISL_2860011, EPI_ISL_2860015, EPI_ISL_2860016, EPI_ISL_2860020, EPI_ISL_2860030, EPI_ISL_2860047, EPI_ISL_2860051, EPI_ISL_2860056, EPI_ISL_2860065, EPI_ISL_2860068, EPI_ISL_2860079, EPI_ISL_2860084, EPI_ISL_2860088, EPI_ISL_2860089, EPI_ISL_2860092, EPI_ISL_2860095, EPI_ISL_2860109, EPI_ISL_2860120, EPI_ISL_2860123, EPI_ISL_2860130, EPI_ISL_2860141, EPI_ISL_2860143, EPI_ISL_2860144, EPI_ISL_2860151, EPI_ISL_2860169, EPI_ISL_2860170, EPI_ISL_4713227, EPI_ISL_4717134, EPI_ISL_5538728, EPI_ISL_5540463, EPI_ISL_5541341, EPI_ISL_5562285, EPI_ISL_5562373, EPI_ISL_5562595, EPI_ISL_5568821, EPI_ISL_5569043, EPI_ISL_5569069, EPI_ISL_5569162, EPI_ISL_5569428, EPI_ISL_5569437, EPI_ISL_5569517, EPI_ISL_5569630, EPI_ISL_5569833, EPI_ISL_5570065, EPI_ISL_5570173, EPI_ISL_5570281, EPI_ISL_5570485, EPI_ISL_5570513, EPI_ISL_5570583, EPI_ISL_5570621, EPI_ISL_5570674, EPI_ISL_5570682, EPI_ISL_5570861, EPI_ISL_5570862 | see above                                                   | The Medical City                                                                                                               | Philippine Genome Center<br>Alethea R. de Guzman; Alyssa Joyce E. Telles; Anna Ong-Lim; Arianne A. Zamora; Benedict A. Maralit; Carlo M. Lapid; Celia Carlos; Cynthia P. Saloma; Devon Ray Pacial; Diomedes A. Cariño; Edsel Maurice Salvana; El King D. Morado; Elcid Aaron R. Pangilinan; Eva Maria Cutiongco-de la Paz; Francis A. Tablizo; Henrietta Marie Rodriguez; Jaime C. Montoya; Jan Michael C. Yap; Jarvin E. Nipales; Jo-Hannah S. Llames; John Michael Egana; John Q. Wong; Joshua Gregor A. Dizon; Joshua Jose Endozo; Juan Antonio R. Magalang; Karol Sophia Agape R. Padilla; Kenneth M. Kim; Kris P. Punayan; Kristina Patriz Dela Cruz; Lindsay Clare D.L. Carandang; Ma. Exanil Plantig; Marc Edsel C. Ayes; Maria Rosario Singh-Vergeire; Maria Sofia L. Yangzon; Marielle M. Gamboa; Marissa Alejandria; Niña Francesca Bustamante; Razel Nikka M. Hao; Renato Jacinto Q. Mantaring; Rianna Patricia S. Cruz; Shiela Mae M. Araiza; Yvonne Valerie Austria; Zipporah Mariebelle R. Enriquez; Zryel V. Mollejon |
| EPI_ISL_3930213                                                                                                                                                                                                                                                                                                                                                                                                                                                                                                                                                                                                                                                                                                                                                                                                                                                                                                                                                                                                                                                                                                                | The National University Hospital of Iceland                 | deCODE genetics                                                                                                                | Agnar Helgason; Alma Moller; Arna B Agustsdottir; Arnaldur Gyflason; Asgeir Sigurdsson; Aslaug Jonasdottir; Berglind Eiriksdottir; Bjarni Thorbjornsson; Brynjar O Jenson; Daniel F Gudbjartsson; Droplaug N Magnúsdóttir; Elisabet E Gardarsdóttir; Emil A Thorarenson; Gardar Sveinbjornsson; Gisli Masson; Gudmundur Georgsson; Gudmundur L Norddahl; Gudrun Sigmundsdottir; Hakon Jonsson; Hannes Eiríksdóttir; Kamilla S Josefsdóttir; Karl Stefansson; Karl G Kristinnsson; Kjartan R Gudmundsson; Kristin E Sveinsdóttir; Kristján E Hjörleifsson; Louise le Roux; Maney Sveinsdóttir; Olafía S Gretarsdóttir; Olafur T Magnusson; Pall Melsted; Patrick Sulem; Run Fridriksdóttir; Solvi Rogvaldsson; Thora R Gunnarsdóttir; Thorður Kristjánsson; Thorólfur Guðnason; Unnur Thorsteinsdóttir                                                                                                                                                                                                                                |

|                                                                                                                                                                                                                                                                                                                                                                                                                                                                                                                                                                                                                   |                                                                                               |                                                                                                                                |                                                                                                                                                                                                                                                                                                                                                                                                                                                                                                                                                                                                                                                                                                                                                                                                                                                                                                                                                                                                                                                                                                                                                                                                                                                                                                                                                                                                                                                                                                                                                                                                       |
|-------------------------------------------------------------------------------------------------------------------------------------------------------------------------------------------------------------------------------------------------------------------------------------------------------------------------------------------------------------------------------------------------------------------------------------------------------------------------------------------------------------------------------------------------------------------------------------------------------------------|-----------------------------------------------------------------------------------------------|--------------------------------------------------------------------------------------------------------------------------------|-------------------------------------------------------------------------------------------------------------------------------------------------------------------------------------------------------------------------------------------------------------------------------------------------------------------------------------------------------------------------------------------------------------------------------------------------------------------------------------------------------------------------------------------------------------------------------------------------------------------------------------------------------------------------------------------------------------------------------------------------------------------------------------------------------------------------------------------------------------------------------------------------------------------------------------------------------------------------------------------------------------------------------------------------------------------------------------------------------------------------------------------------------------------------------------------------------------------------------------------------------------------------------------------------------------------------------------------------------------------------------------------------------------------------------------------------------------------------------------------------------------------------------------------------------------------------------------------------------|
| EPI_ISL_2758864, EPI_ISL_2758869, EPI_ISL_2834233                                                                                                                                                                                                                                                                                                                                                                                                                                                                                                                                                                 | The Ohio State University Applied Microbiology Services Laboratory                            | The Ohio State University Applied Microbiology Services Laboratory                                                             | Seth A. Faith PhD                                                                                                                                                                                                                                                                                                                                                                                                                                                                                                                                                                                                                                                                                                                                                                                                                                                                                                                                                                                                                                                                                                                                                                                                                                                                                                                                                                                                                                                                                                                                                                                     |
| EPI_ISL_2375939, EPI_ISL_2375940, EPI_ISL_2375941                                                                                                                                                                                                                                                                                                                                                                                                                                                                                                                                                                 | Thembalethu CDC wc THC                                                                        | NHLUS/UCT                                                                                                                      | Arash Iranzadeh; Bruna Galvao; Carolyn Williamson; Deelan Doolabh; Diana Hardie; Innocent Mudau; Kruger Marais; Lynn Tyers; Marvin Hsiao; Stephen Korsman                                                                                                                                                                                                                                                                                                                                                                                                                                                                                                                                                                                                                                                                                                                                                                                                                                                                                                                                                                                                                                                                                                                                                                                                                                                                                                                                                                                                                                             |
| EPI_ISL_3643199                                                                                                                                                                                                                                                                                                                                                                                                                                                                                                                                                                                                   | TriCore Reference Laboratory Inc.                                                             | New Mexico Department of Health Scientific Laboratory                                                                          | Anastacia Griego-Fisher; D'eldra Malone; Ellie Johnson; Jennifer Benoit                                                                                                                                                                                                                                                                                                                                                                                                                                                                                                                                                                                                                                                                                                                                                                                                                                                                                                                                                                                                                                                                                                                                                                                                                                                                                                                                                                                                                                                                                                                               |
| EPI_ISL_3342350, EPI_ISL_3342351, EPI_ISL_3342359, EPI_ISL_3342369, EPI_ISL_3342370, EPI_ISL_3342389, EPI_ISL_3342409                                                                                                                                                                                                                                                                                                                                                                                                                                                                                             | see above                                                                                     | Tshwaragano laboratory                                                                                                         | National Institute for Communicable Diseases of the National Health Laboratory Service                                                                                                                                                                                                                                                                                                                                                                                                                                                                                                                                                                                                                                                                                                                                                                                                                                                                                                                                                                                                                                                                                                                                                                                                                                                                                                                                                                                                                                                                                                                |
| EPI_ISL_2649994                                                                                                                                                                                                                                                                                                                                                                                                                                                                                                                                                                                                   | Tuanku Fauziah Hospital                                                                       | Institute for Medical Research, Infectious Disease Research Centre, National Institutes of Health, Ministry of Health Malaysia | Azizan MA; Kamel K; Mohd Zawawi Z; Ramly N; Robert F; Suppiah J; Thayan R                                                                                                                                                                                                                                                                                                                                                                                                                                                                                                                                                                                                                                                                                                                                                                                                                                                                                                                                                                                                                                                                                                                                                                                                                                                                                                                                                                                                                                                                                                                             |
| EPI_ISL_2650006, EPI_ISL_2811872                                                                                                                                                                                                                                                                                                                                                                                                                                                                                                                                                                                  | Tumpat Hospital                                                                               | Institute for Medical Research, Infectious Disease Research Centre, National Institutes of Health, Ministry of Health Malaysia | Azizan MA; Kamel K; Mohd Zawawi Z; Ramly N; Robert F; Suppiah J; Thayan R                                                                                                                                                                                                                                                                                                                                                                                                                                                                                                                                                                                                                                                                                                                                                                                                                                                                                                                                                                                                                                                                                                                                                                                                                                                                                                                                                                                                                                                                                                                             |
| EPI_ISL_3162297                                                                                                                                                                                                                                                                                                                                                                                                                                                                                                                                                                                                   | Turkish Society of Internal Medicine                                                          | Gen Era Diagnostics Corporation Life Science Research and Molecular Diagnostics                                                | Serhat Ünal                                                                                                                                                                                                                                                                                                                                                                                                                                                                                                                                                                                                                                                                                                                                                                                                                                                                                                                                                                                                                                                                                                                                                                                                                                                                                                                                                                                                                                                                                                                                                                                           |
| EPI_ISL_3045905, EPI_ISL_3215196                                                                                                                                                                                                                                                                                                                                                                                                                                                                                                                                                                                  | U.O. Microbiologia Laboratorio Unico Centro Servizi - AUSL della Romagna                      | U.O. Microbiologia, Laboratorio Unico Centro Servizi - AUSL della Romagna                                                      | Giorgio Dirani                                                                                                                                                                                                                                                                                                                                                                                                                                                                                                                                                                                                                                                                                                                                                                                                                                                                                                                                                                                                                                                                                                                                                                                                                                                                                                                                                                                                                                                                                                                                                                                        |
| EPI_ISL_3419538, EPI_ISL_3419548                                                                                                                                                                                                                                                                                                                                                                                                                                                                                                                                                                                  | UC Davis Genome Center and Healthy Davis Together                                             | UC Davis Genome Center                                                                                                         | UC Davis                                                                                                                                                                                                                                                                                                                                                                                                                                                                                                                                                                                                                                                                                                                                                                                                                                                                                                                                                                                                                                                                                                                                                                                                                                                                                                                                                                                                                                                                                                                                                                                              |
| EPI_ISL_3061931                                                                                                                                                                                                                                                                                                                                                                                                                                                                                                                                                                                                   | UCSC Genomics Institute                                                                       | UCSC Genomics Institute                                                                                                        | A. Marm Kilpatrick; Angie Hinrichs; Beth Shapiro; Bryan Thornlow; Ciara Wanket; David Haussler; Eric Beraut; Hugh Olsen; Ikenna Anigobug; Isabel Bjork; Jakob McBroom; Jeremy Sanford; Joshua Kapp; Mark Akeson; Maximilian Haeussler; Michael Stone; Miten Jain; Molly Cassatt-Johnstone; Namrita Dhillon; Russell Corbett-Detig; Terren Chang; Yatish Turakhia                                                                                                                                                                                                                                                                                                                                                                                                                                                                                                                                                                                                                                                                                                                                                                                                                                                                                                                                                                                                                                                                                                                                                                                                                                      |
| EPI_ISL_4003580, EPI_ISL_4003581, EPI_ISL_4003582, EPI_ISL_4003583, EPI_ISL_4003584                                                                                                                                                                                                                                                                                                                                                                                                                                                                                                                               | UFS Virology                                                                                  | KRISP, KZN Research Innovation and Sequencing Platform                                                                         | D Goedhals; Emmanuel Ogunbayo; Emmanuel S; Giandhari J; MM Nyaga; MT Mogotsi; Naidoo Yeshnee; P Nthiga; PA Bester; Pillay S; Tegally H; Tshabula Derek; Wilkinson E; Yajna Ramphal; de Oliveira T                                                                                                                                                                                                                                                                                                                                                                                                                                                                                                                                                                                                                                                                                                                                                                                                                                                                                                                                                                                                                                                                                                                                                                                                                                                                                                                                                                                                     |
| EPI_ISL_2812358, EPI_ISL_2812363, EPI_ISL_2812365, EPI_ISL_2812367, EPI_ISL_2812368, EPI_ISL_2812370, EPI_ISL_2812371, EPI_ISL_2812385, EPI_ISL_2812386, EPI_ISL_2812391, EPI_ISL_2812394, EPI_ISL_2812398, EPI_ISL_2812399, EPI_ISL_2812401, EPI_ISL_2812402, EPI_ISL_2812403, EPI_ISL_2812405, EPI_ISL_2812406, EPI_ISL_2812407, EPI_ISL_2812414, EPI_ISL_2812419, EPI_ISL_2812425, EPI_ISL_2812426, EPI_ISL_2812428, EPI_ISL_2841636, EPI_ISL_2841639, EPI_ISL_2841642, EPI_ISL_4108313, EPI_ISL_4108316, EPI_ISL_4108330, EPI_ISL_4108332, EPI_ISL_4108333, EPI_ISL_4108337, EPI_ISL_4108339, EPI_ISL_4108341 | see above                                                                                     | UFS Virology                                                                                                                   | KRISP, KZN Research Innovation and Sequencing Platform                                                                                                                                                                                                                                                                                                                                                                                                                                                                                                                                                                                                                                                                                                                                                                                                                                                                                                                                                                                                                                                                                                                                                                                                                                                                                                                                                                                                                                                                                                                                                |
| EPI_ISL_2376400, EPI_ISL_2448442, EPI_ISL_2448443                                                                                                                                                                                                                                                                                                                                                                                                                                                                                                                                                                 | ULSS 2 Marca Trevigiana                                                                       | Istituto Zooprofilattico Sperimentale delle Venezie                                                                            | Adelaide Milani; Alessia Schivo; Alice Fusaro; Ambra Pastori; Annalisa Salviato; Antonia Ricci; Calogero Terregino; Edoardo Giussani; Elisa Palumbo; Erika Giorgia Quaranta; Isabella Monne; Luca Tassoni                                                                                                                                                                                                                                                                                                                                                                                                                                                                                                                                                                                                                                                                                                                                                                                                                                                                                                                                                                                                                                                                                                                                                                                                                                                                                                                                                                                             |
| EPI_ISL_2392013                                                                                                                                                                                                                                                                                                                                                                                                                                                                                                                                                                                                   | ULSS 4 Veneto Orientale                                                                       | Istituto Zooprofilattico Sperimentale delle Venezie                                                                            | Adelaide Milani; Alessia Schivo; Alice Fusaro; Ambra Pastori; Annalisa Salviato; Antonia Ricci; Calogero Terregino; Edoardo Giussani; Elisa Palumbo; Erika Giorgia Quaranta; Isabella Monne; Luca Tassoni                                                                                                                                                                                                                                                                                                                                                                                                                                                                                                                                                                                                                                                                                                                                                                                                                                                                                                                                                                                                                                                                                                                                                                                                                                                                                                                                                                                             |
| EPI_ISL_3536069                                                                                                                                                                                                                                                                                                                                                                                                                                                                                                                                                                                                   | UMC Groningen, Clinical Virology, Department of Medical Microbiology and Infection Prevention | UMC Groningen, Clinical Virology, Department of Medical Microbiology and Infection Prevention                                  | Alexander Friedrich; Coretta Van Leer-Buter; Erley Lizarazo-Forero; Hubert Niesters; Lilli Gard; Marjolein Knoester; Monika Fliiss; Sigrid Rosema; Xuewei Zhou                                                                                                                                                                                                                                                                                                                                                                                                                                                                                                                                                                                                                                                                                                                                                                                                                                                                                                                                                                                                                                                                                                                                                                                                                                                                                                                                                                                                                                        |
| EPI_ISL_4459371                                                                                                                                                                                                                                                                                                                                                                                                                                                                                                                                                                                                   | UNIHEALTH PARANAQUE HOSPITAL AND MEDICAL CENTER, INC.                                         | Research Institute for Tropical Medicine/Tohoku University                                                                     | Allen Anthony Laraño; Ardiane Ysabelle Dolor; Catalino Demetria; Clyde Dapag; Emmanuel Kagning Tsinda; Francisco Gerardo Polotan; Hitoshi Oshitani; Inez Andrea Medado; Jefferson Earl Halog; Lei Lanna Dancel; Leilanie Nacion; Ma. Angelica Tujan; Machiko Okamoto; Maria Carmen Corpuz; Mariko Siato-Obata; Mayuko Saito                                                                                                                                                                                                                                                                                                                                                                                                                                                                                                                                                                                                                                                                                                                                                                                                                                                                                                                                                                                                                                                                                                                                                                                                                                                                           |
| EPI_ISL_2895467, EPI_ISL_2992016                                                                                                                                                                                                                                                                                                                                                                                                                                                                                                                                                                                  | UNILABS<br>UNR School of Medicine, Nevada State Public Health Laboratory                      | Instituto Nacional de Saude (INSA)<br>UNR School of Medicine, Nevada State Public Health Laboratory                            | Borges et al<br>A.J.; Gorzalski; Pandori, M.                                                                                                                                                                                                                                                                                                                                                                                                                                                                                                                                                                                                                                                                                                                                                                                                                                                                                                                                                                                                                                                                                                                                                                                                                                                                                                                                                                                                                                                                                                                                                          |
| EPI_ISL_4741530, EPI_ISL_4742099, EPI_ISL_4742246                                                                                                                                                                                                                                                                                                                                                                                                                                                                                                                                                                 | UPLB Covid-19 Molecular Diagnostic Laboratory                                                 | Philippine Genome Center                                                                                                       | Alethea R. de Guzman; Anna Ong-Lim; Arianne A. Zamora; Benedict A. Maralit; Carlo M. Lapid; Celia Carlos; Cynthia P. Saloma; Devon Ray Pacial; Diomedes A. Cariño; Edsel Maurice Salvana; El King D. Morado; Elcid Aaron R. Pangilinan; Eva Maria Cutiongco-de la Paz; Francis A. Tablizo; Henrietta Marie Rodriguez; Jaime C. Montoya; Jan Michael C. Yap; Jarvin E. Nipales; Jo-Hannah S. Llamas; John Q. Wong; Joshua Gregor A. Dizon; Juan Antonio R. Magalang; Karol Sophia Agape R. Padilla; Kenneth M. Kim; Kris P. Punayan; Kristina Patriz Dela Cruz; Lindsay Clare D.L. Carandang; Ma. Exanil Planting; Marc Edsel C. Ayes; Maria Rosario Singh-Vergeire; Maria Sofia L. Yangzon; Marielle M. Gamboa; Marissa Alejandria; Niña Francesca Bustamante; Razel Nikka M. Hao; Renato Jacinto Q. Mantaring; Rianna Patricia S. Cruz; Shiela Mae M. Araiza; Yvonne Valerie Austria; Zipporah Mariebelle R. Enriquez; Zyrel V. Mollejon                                                                                                                                                                                                                                                                                                                                                                                                                                                                                                                                                                                                                                                             |
| EPI_ISL_2775739, EPI_ISL_2775849                                                                                                                                                                                                                                                                                                                                                                                                                                                                                                                                                                                  | UPMC Clinical Microbiology Laboratory                                                         | Microbial Genome Sequencing Center; Microbial Genomic Epidemiology Laboratory, University of Pittsburgh                        | Daniel J. Snyder; Jane W. Marsh; Kady D. Waggle; Lee H. Harrison; Marissa P. Griffith; Vatsala R. Srinivasa; Vaughn S. Cooper                                                                                                                                                                                                                                                                                                                                                                                                                                                                                                                                                                                                                                                                                                                                                                                                                                                                                                                                                                                                                                                                                                                                                                                                                                                                                                                                                                                                                                                                         |
| EPI_ISL_2854710                                                                                                                                                                                                                                                                                                                                                                                                                                                                                                                                                                                                   | UPTDLABKESDA Kota Depok                                                                       | National Institute of Health Research and Development                                                                          | Arie Ardiansyah Nugraha; Hana Apsari Pawestri; Hartanti Dian Ikawati; Kartika Dewi Puspa; Krisna Pangesti; Nelly Puspandari; Subangkit; Triyani Soekaros; Vivi Setiawaty                                                                                                                                                                                                                                                                                                                                                                                                                                                                                                                                                                                                                                                                                                                                                                                                                                                                                                                                                                                                                                                                                                                                                                                                                                                                                                                                                                                                                              |
| EPI_ISL_2422357, EPI_ISL_2627062, EPI_ISL_3030947, EPI_ISL_3030999                                                                                                                                                                                                                                                                                                                                                                                                                                                                                                                                                | URMC LABS                                                                                     | Wadsworth Center, New York State Department of Health                                                                          | Alexis Russell; Catharine Prussing; Daryl M. Lamson; Erasmus Schneider; Erica Lasek-Nesselquist; John Kelly; Jonathan Piltnick; Kirsten St. George; Matthew Shudt; Melissa A Leisner; Navjot Singh                                                                                                                                                                                                                                                                                                                                                                                                                                                                                                                                                                                                                                                                                                                                                                                                                                                                                                                                                                                                                                                                                                                                                                                                                                                                                                                                                                                                    |
| EPI_ISL_2383564, EPI_ISL_2383565, EPI_ISL_2402321, EPI_ISL_2402329, EPI_ISL_2426776, EPI_ISL_2426777, EPI_ISL_2426779, EPI_ISL_2426780, EPI_ISL_2450395, EPI_ISL_2450426                                                                                                                                                                                                                                                                                                                                                                                                                                          | see above                                                                                     | US Air Force School of Aerospace Medicine                                                                                      | Amanda Javorina; Anthony Fries; Carol Garrett; Clarise Starr; Cole Anderson; Elizabeth Macias; Fritz Castillo; Jennifer Meyer; Sarah Purves; William Gruner                                                                                                                                                                                                                                                                                                                                                                                                                                                                                                                                                                                                                                                                                                                                                                                                                                                                                                                                                                                                                                                                                                                                                                                                                                                                                                                                                                                                                                           |
| EPI_ISL_3354824, EPI_ISL_3354827, EPI_ISL_3354828, EPI_ISL_3354830, EPI_ISL_3354833, EPI_ISL_3354834, EPI_ISL_3354867, EPI_ISL_3354869, EPI_ISL_3354974, EPI_ISL_3354977, EPI_ISL_3354993, EPI_ISL_3354994                                                                                                                                                                                                                                                                                                                                                                                                        | see above                                                                                     | UT-Unified State Labs: Public Health Utah DOH                                                                                  | Centers for Disease Control and Prevention Division of Viral Diseases, Pathogen Discovery                                                                                                                                                                                                                                                                                                                                                                                                                                                                                                                                                                                                                                                                                                                                                                                                                                                                                                                                                                                                                                                                                                                                                                                                                                                                                                                                                                                                                                                                                                             |
| EPI_ISL_2405005, EPI_ISL_2405006, EPI_ISL_2405025, EPI_ISL_2426477, EPI_ISL_2426495, EPI_ISL_2426505, EPI_ISL_2426555, EPI_ISL_2432662, EPI_ISL_2497353, EPI_ISL_2497382, EPI_ISL_2497422, EPI_ISL_2502909, EPI_ISL_2502920, EPI_ISL_2503036, EPI_ISL_2503127, EPI_ISL_2544916, EPI_ISL_2544922, EPI_ISL_2544951, EPI_ISL_2544960, EPI_ISL_2544970, EPI_ISL_2618122, EPI_ISL_2618346, EPI_ISL_2618581, EPI_ISL_2618719, EPI_ISL_2693736, EPI_ISL_2802875, EPI_ISL_2802877, EPI_ISL_2937938, EPI_ISL_3025982, EPI_ISL_3411448, EPI_ISL_3692589                                                                     | see above                                                                                     | UW Virology Lab                                                                                                                | Alexander Greninger; Hong Xie; Keith R Jerome; Lasata Shrestha; Maria Lukes; Meeli-Li Huang; Michelle Lin; Nathan Breit; Noah R. Baker; Patrick Mathias; Pavitra Roychoudhury; Ricardo Perez; Robert J. Livingston; Saraswathi Sathees; Savanna S. Carmack; Sean Ellis; Shah Mohamed Bakhsh; Tien V. Nguyen                                                                                                                                                                                                                                                                                                                                                                                                                                                                                                                                                                                                                                                                                                                                                                                                                                                                                                                                                                                                                                                                                                                                                                                                                                                                                           |
| EPI_ISL_2490418, EPI_ISL_2490419, EPI_ISL_2490420, EPI_ISL_2490421, EPI_ISL_2490422                                                                                                                                                                                                                                                                                                                                                                                                                                                                                                                               | Unidad de Investigación Médica de Yucatán (UIMY)                                              | Centro de Investigación en Enfermedades Infecciosas (CIENI), Instituto Nacional de Enfermedades Respiratorias (INER)           | ; Alejandra García-Gasca; Alejandra Hernández-Terán; Alejandro Sanchez-Flores; Alfredo Herrera-Estrella; Alicia Ocaña-Mondragón; Andreu Comas García; Angel Gustavo Salas-Lais; Antonio Loza Román; Bernardo Martínez-Miguel; Blanca Taboada; Brenda Irasema Maldonado-Meza; Bruno Gomez-Gil; Carla Ivón Herrera-Najera; Carlos F. Arias; Celia Boukadida; Clara Esperanza Santacruz-Tinoco; Concepción Grajales-Muñiz; Consorcio Mexicano de Vigilancia Genómica (CoViGen-Mex). Authors (in alphabetical order): Julio Elias Alvarado-Yaah; Cristóbal Cháidez-Quiróz; Célida Duque Molina; Célida Martínez- Rodríguez; Daniel Fregoso-Rueda; Daniel Lira Morales; Eduardo Becerril-Vargas; Fernando Fontove-Herrera; Fidencio Mejía-Nepomuceno; Francisco Pulido; Gloria Elena Espinosa-Ayala; Gloria María Molina-Salinas; Gloria Vazquez; Hector Esteban Paz-Juárez; Hector Montoya-Fuentes; Helen Haydee Fernanda Ramirez-Plascencia; Irvin González-López; Jean Pierre González; Joel Armando Vázquez-Pérez.; Jorge Salas-Hernández; José Antonio Enciso-Moreno; José Arturo Martínez-Orozco; José Esteban Muñoz-Medina; José de Jesús Nuñez-Contreras; Juan Bautista Chale-Dzul; Julissa Enciso-Ibarra; Luis Alberto Ochoa-Carrera; Margarita Matias-Florentino; Mario Mújica-Sánchez; Marissa Perez-Garcia; María Guadalupe Santiago-Mauricio; María Guadalupe de Jesús Mireles-Rivera; Nelly Selem-Mojica; Pavel Isa; Ricardo Ciria Merce; Ricardo Grande; Rosa María Gutierrez-Rios; Santiago Avila-Rios; Selene Zárate; Susana Lopez; Victor Eduardo García-Arias; Victor Hugo Borja-Aburto |
| EPI_ISL_2402044                                                                                                                                                                                                                                                                                                                                                                                                                                                                                                                                                                                                   | Unidad de Investigación Médica de Yucatán (UIMY)                                              | Unidad de Genómica Avanzada                                                                                                    | Alejandro Sanchez-Flores; Alfredo Herrera-Estrella; Alicia Ocana-Mondragon; Angel Gustavo Salas-Lais; Blanca Taboada; Brenda Irasema Maldonado-Meza; Carla Ivon Herrera-Najera; Carlos F. Arias; Celia Boukadida; Clara Esperanza Santacruz-Tinoco; Concepcion Grajales-Muniz; Consorcio Mexicano de Vigilancia Genómica (CoViGen-Mex). Authors (in alphabetical order): Julio Elias Alvarado-Yaah; Fernando Fontove-Herrera; Francisco Pulido; Gloria Elena Espinoza-Ayala; Gloria Maria Molina-Salinas; Gloria Vazquez; Hector Esteban Paz-Juarez; Hector Montoya-Fuentes; Helen Haydee Fernanda Ramirez-Plascencia; Jorge Ivan Salinal-Navarez; Jose Antonio Enciso-Moreno; Jose de Jesus Nunez-Contreras; Juan Bautista Chale-Dzul; Luis Alberto Ochoa-Carrera; Margarita Matias-Florentino; Maria Guadalupe Santiago-Mauricio; Maria Guadalupe de Jesus Mireles-Rivera; Nelly Selem-Mojica; Pavel Isa; Ricardo Grande; Santiago Avila-Rios; Victor Hugo Borja-Aburto                                                                                                                                                                                                                                                                                                                                                                                                                                                                                                                                                                                                                             |
| EPI_ISL_2898181, EPI_ISL_2898185, EPI_ISL_2898204, EPI_ISL_2898208, EPI_ISL_2898507, EPI_ISL_2898854, EPI_ISL_2899037, EPI_ISL_2899120                                                                                                                                                                                                                                                                                                                                                                                                                                                                            | see above                                                                                     | Unilabs                                                                                                                        | Karolinska University Hospital                                                                                                                                                                                                                                                                                                                                                                                                                                                                                                                                                                                                                                                                                                                                                                                                                                                                                                                                                                                                                                                                                                                                                                                                                                                                                                                                                                                                                                                                                                                                                                        |
| EPI_ISL_2811875                                                                                                                                                                                                                                                                                                                                                                                                                                                                                                                                                                                                   | Universiti Sains Malaysia Hospital                                                            | Institute for Medical Research, Infectious Disease Research Centre, National Institutes of Health, Ministry of Health Malaysia | Azizan MA; Kamel K; Mohd Zawawi Z; Ramly N; Robert F; Suppiah J; Thayan R                                                                                                                                                                                                                                                                                                                                                                                                                                                                                                                                                                                                                                                                                                                                                                                                                                                                                                                                                                                                                                                                                                                                                                                                                                                                                                                                                                                                                                                                                                                             |
| EPI_ISL_4458456                                                                                                                                                                                                                                                                                                                                                                                                                                                                                                                                                                                                   | University Hospital, San Antonio                                                              | STRL UT Health San Antonio, Greehey Children's Cancer Research Institute                                                       | Bethany Landry; Dawn Garcia; Guillermo Nunez; Hongxin Fan; Josefina Stoever; Korri Weldon; Kumari Vladamudi; Marjorie Parker David; San Antonio Metropolitan Health District; Weijing He; Yidong Chen; Zhao Lai; Zhenqing Ye                                                                                                                                                                                                                                                                                                                                                                                                                                                                                                                                                                                                                                                                                                                                                                                                                                                                                                                                                                                                                                                                                                                                                                                                                                                                                                                                                                          |



|                                                                                                                                                                                                                                                                                                                                                                                                                                                                                                                                                                                                                                                                                                                                                                                                                                                                                                   |                                                                                         |                                                                                      |                                                                                                                                                                                                                                                                                                                                                                                                                                                                                                                                                                                                                                                                                                                                                                                                                                                                                                                                                                                                                                       |
|---------------------------------------------------------------------------------------------------------------------------------------------------------------------------------------------------------------------------------------------------------------------------------------------------------------------------------------------------------------------------------------------------------------------------------------------------------------------------------------------------------------------------------------------------------------------------------------------------------------------------------------------------------------------------------------------------------------------------------------------------------------------------------------------------------------------------------------------------------------------------------------------------|-----------------------------------------------------------------------------------------|--------------------------------------------------------------------------------------|---------------------------------------------------------------------------------------------------------------------------------------------------------------------------------------------------------------------------------------------------------------------------------------------------------------------------------------------------------------------------------------------------------------------------------------------------------------------------------------------------------------------------------------------------------------------------------------------------------------------------------------------------------------------------------------------------------------------------------------------------------------------------------------------------------------------------------------------------------------------------------------------------------------------------------------------------------------------------------------------------------------------------------------|
| EPI_ISL_2405240,<br>EPI_ISL_2405241,<br>EPI_ISL_2405247,<br>EPI_ISL_2490653,<br>EPI_ISL_2790089,<br>EPI_ISL_2885475<br>EPI_ISL_2476355                                                                                                                                                                                                                                                                                                                                                                                                                                                                                                                                                                                                                                                                                                                                                            | University Hospitals of Geneva,<br>Laboratory of Virology                               | HUG, Laboratory of Virology and the<br>Health2030 Genome Center                      | Ana Rita Goncalves; Deborah Penet; Emmanouil Dermitzakis; Henri Pegeot; Ioannis Xenarios; Keith Harshman; Laurent Kaiser; Lorenzo Cerutti; Melyssa Elies; Samuel Cordey                                                                                                                                                                                                                                                                                                                                                                                                                                                                                                                                                                                                                                                                                                                                                                                                                                                               |
| EPI_ISL_3483748,<br>EPI_ISL_3483979,<br>EPI_ISL_3484066,<br>EPI_ISL_3484220                                                                                                                                                                                                                                                                                                                                                                                                                                                                                                                                                                                                                                                                                                                                                                                                                       | University of Chicago Medicine<br>University of Health Sciences                         | RIPHL at Rush University Medical Center<br>Quadram Institute Bioscience              | Felix Araujo Perez; Kevin Kunstman; Laura Furtado; Lauren Megger; Marieta Hyde; Max Kolton; Stefan Green<br>Amir Ashiq; Abdul Sattar; Alexander J Trotter; Alison E. Mather; Almira Shafiq; Alp Aydin; Ana P. Tedin; Anastasia Kolyva; Andrew Bell; Andrew J. Page; Asghar Javeed; Claire Stuart; Dave J. Baker; Gemma L. Kay; Hazir Rahman; Javed Akram; John Wain; Justin Grady; Khushbakhth kirm; Leonardo de Oliveira Martins; Lizzie Meadows; Maria Diaz; Mark Webber; Muhammad Asad Ali; Muhammad Asif Naveed; Muhammad Bilal Sarwar; Muhammad Nawaz; Muhammad Raza; Muhammad Shabbaz Hussain; Muhammed Yasir; Muhammad Ilyas; Nabil-Fareed Alikhan; Nadeem Afzal; Nadia Mukhtar; Naila Tariq; Ngozi Elumogo; Nicholas M. Thomson; Qadeer Ahmad; Rachael Stanley; Rachel Gilroy; Reenesh Prakash; Samir Dervisevic; Samuel Bloomfield; Shah Jahang; Sidra-tul-muntaha; Steven Rudder; Tahir Yaqoob; Thanh Le-Viet; Waseem Iqbal; Zahid Latif                                                                                    |
| EPI_ISL_2476389                                                                                                                                                                                                                                                                                                                                                                                                                                                                                                                                                                                                                                                                                                                                                                                                                                                                                   | University of Illinois at Chicago                                                       | RIPHL at Rush University Medical Center                                              | Felix Araujo Perez; Julie Bentea; Kevin Kunstman; Laura Furtado; Marieta Hyde; Max Kolton; Omar Perez; Stefan Green                                                                                                                                                                                                                                                                                                                                                                                                                                                                                                                                                                                                                                                                                                                                                                                                                                                                                                                   |
| EPI_ISL_2382840,<br>EPI_ISL_2382855,<br>EPI_ISL_2499991                                                                                                                                                                                                                                                                                                                                                                                                                                                                                                                                                                                                                                                                                                                                                                                                                                           | University of Liège COVID-19 testing<br>center                                          | GIGA Medical Genomics                                                                | Bouchra Boujemla; Cécile Meex; Fabrice Bureau; Keith Durkin; Laurent Gillet; Maria Artesi; Marie-Pierre Hayette; Nathalie Renotte; Sébastien Bontems; Vincent Bours; Wouter Coppieters                                                                                                                                                                                                                                                                                                                                                                                                                                                                                                                                                                                                                                                                                                                                                                                                                                                |
| EPI_ISL_2400368,<br>EPI_ISL_2400369                                                                                                                                                                                                                                                                                                                                                                                                                                                                                                                                                                                                                                                                                                                                                                                                                                                               | University of Michigan Clinical<br>Microbiology Laboratory                              | Lauring Lab, University of Michigan,<br>Department of Microbiology and<br>Immunology | Gilbert                                                                                                                                                                                                                                                                                                                                                                                                                                                                                                                                                                                                                                                                                                                                                                                                                                                                                                                                                                                                                               |
| EPI_ISL_2467794                                                                                                                                                                                                                                                                                                                                                                                                                                                                                                                                                                                                                                                                                                                                                                                                                                                                                   | University of Wisconsin-Madison AIDS<br>Vaccine Research Laboratories                   | University of Wisconsin-Madison AIDS<br>Vaccine Research Laboratories                | Gage Moreno; Katarina Braun; et al. AIDS Vaccine Research Laboratories                                                                                                                                                                                                                                                                                                                                                                                                                                                                                                                                                                                                                                                                                                                                                                                                                                                                                                                                                                |
| EPI_ISL_2803348, EPI_ISL_2803350, EPI_ISL_2803359, EPI_ISL_2803360, EPI_ISL_2803454, EPI_ISL_2803514, EPI_ISL_2803515, EPI_ISL_2803516, EPI_ISL_2803517, EPI_ISL_2803518, EPI_ISL_2803519, EPI_ISL_2803520, EPI_ISL_2803521, EPI_ISL_2803522, EPI_ISL_2803523, EPI_ISL_2803524, EPI_ISL_2803563, EPI_ISL_2803564, EPI_ISL_2803565, EPI_ISL_2803566, EPI_ISL_2803568, EPI_ISL_2803570, EPI_ISL_2803573, EPI_ISL_2803574, EPI_ISL_2803575, EPI_ISL_2803576, EPI_ISL_2803577, EPI_ISL_2803581, EPI_ISL_2803583, EPI_ISL_2803587, EPI_ISL_2803589, EPI_ISL_2803591, EPI_ISL_2803592, EPI_ISL_2803593, EPI_ISL_2803595, EPI_ISL_2803596, EPI_ISL_2803598, EPI_ISL_2803599, EPI_ISL_2803600, EPI_ISL_2803602, EPI_ISL_2803604, EPI_ISL_2803605, EPI_ISL_2803607, EPI_ISL_2803608, EPI_ISL_2803609, EPI_ISL_2803616, EPI_ISL_2803657, EPI_ISL_4513517, EPI_ISL_4513684, EPI_ISL_4513685, EPI_ISL_4513686 | University of Wisconsin-Madison AIDS<br>Vaccine Research Laboratories                   |                                                                                      |                                                                                                                                                                                                                                                                                                                                                                                                                                                                                                                                                                                                                                                                                                                                                                                                                                                                                                                                                                                                                                       |
| see above                                                                                                                                                                                                                                                                                                                                                                                                                                                                                                                                                                                                                                                                                                                                                                                                                                                                                         | University of Zambia, School of<br>Veterinary Medicine                                  | UNZAVET and PATH                                                                     | Daniel Bridges; Mulenga Mwenda-Chimfwembe; Ngonda Saasa; ZNPHI and ZGSC                                                                                                                                                                                                                                                                                                                                                                                                                                                                                                                                                                                                                                                                                                                                                                                                                                                                                                                                                               |
| EPI_ISL_5544071,<br>EPI_ISL_5544079,<br>EPI_ISL_5544098,<br>EPI_ISL_5569173                                                                                                                                                                                                                                                                                                                                                                                                                                                                                                                                                                                                                                                                                                                                                                                                                       | University of the East Ramon<br>Magsaysay Memorial Medical Center<br>(UERM)             | Philippine Genome Center                                                             | Alethea R. de Guzman; Alyssa Joyce E. Telles; Anna Ong-Lim; Arianne A. Zamora; Benedict A. Maralit; Carlo M. Lapid; Celia Carlos; Cynthia P. Saloma; Devon Ray Pacial; Diomedes A. Cariño; Edsel Maurice Salvana; El King D. Morado; Elcid Aaron R. Pangilinan; Eva Maria Cutiongco-de la Paz; Francis A. Tablizo; Henrietta Marie Rodriguez; Jaime C. Montoya; Jan Michael C. Yap; Jarvin E. Nipales; Jo-Hannah S. Llamas; John Michael Egana; John Q. Wong; Joshua Gregor A. Dizon; Joshua Jose Endozo; Juan Antonio R. Magalang; Karol Sophia Agape R. Padilla; Kenneth M. Kim; Kris P. Punayan; Kristina Patriz Dela Cruz; Lindsay Clare D.L. Carandang; Ma. Exanil Plantig; Marc Edsel C. Ayes; Maria Rosario Singh-Vergeire; Maria Sofia L. Yangzon; Marielle M. Gamboa; Mariella Alejandria; Niña Francesca Bustamante; Razel Nikka M. Hao; Renato Jacinto Q. Mantaring; Rianna Patricia S. Cruz; Shiela Mae M. Araiza; Yvonne Valerie Austria; Zipporah Mariebelle R. Enriquez; Zyrel V. Mollejon                             |
| EPI_ISL_4713121                                                                                                                                                                                                                                                                                                                                                                                                                                                                                                                                                                                                                                                                                                                                                                                                                                                                                   | University of the Philippines - PGH-MRL                                                 | Philippine Genome Center                                                             | Alethea R. de Guzman; Anna Ong-Lim; Arianne A. Zamora; Benedict A. Maralit; Carlo M. Lapid; Celia Carlos; Cynthia P. Saloma; Devon Ray Pacial; Diomedes A. Cariño; Edsel Maurice Salvana; El King D. Morado; Elcid Aaron R. Pangilinan; Eva Maria Cutiongco-de la Paz; Francis A. Tablizo; Marie Rodriguez; Jaime C. Montoya; Jan Michael C. Yap; Jarvin E. Nipales; Jo-Hannah S. Llamas; John Q. Wong; Joshua Gregor A. Dizon; Juan Antonio R. Magalang; Karol Sophia Agape R. Padilla; Kenneth M. Kim; Kris P. Punayan; Kristina Patriz Dela Cruz; Lindsay Clare D.L. Carandang; Ma. Exanil Plantig; Marc Edsel C. Ayes; Maria Rosario Singh-Vergeire; Maria Sofia L. Yangzon; Marielle M. Gamboa; Marissa Alejandria; Niña Francesca Bustamante; Razel Nikka M. Hao; Renato Jacinto Q. Mantaring; Rianna Patricia S. Cruz; Shiela Mae M. Araiza; Yvonne Valerie Austria; Zipporah Mariebelle R. Enriquez; Zyrel V. Mollejon                                                                                                        |
| EPI_ISL_5544039,<br>EPI_ISL_5544118,<br>EPI_ISL_5547624,<br>EPI_ISL_5547819,<br>EPI_ISL_5570167                                                                                                                                                                                                                                                                                                                                                                                                                                                                                                                                                                                                                                                                                                                                                                                                   | University of the Philippines National<br>Institutes Of Health (UP NIH)                 | Philippine Genome Center                                                             | Alethea R. de Guzman; Alyssa Joyce E. Telles; Anna Ong-Lim; Arianne A. Zamora; Benedict A. Maralit; Carlo M. Lapid; Celia Carlos; Cynthia P. Saloma; Devon Ray Pacial; Diomedes A. Cariño; Edsel Maurice Salvana; El King D. Morado; Elcid Aaron R. Pangilinan; Eva Maria Cutiongco-de la Paz; Francis A. Tablizo; Henrietta Marie Rodriguez; Jaime C. Montoya; Jan Michael C. Yap; Jarvin E. Nipales; Jo-Hannah S. Llamas; John Q. Wong; Joshua Gregor A. Dizon; Joshua Jose Endozo; Juan Antonio R. Magalang; Karol Sophia Agape R. Padilla; Kenneth M. Kim; Kris P. Punayan; Kristina Patriz Dela Cruz; Lindsay Clare D.L. Carandang; Ma. Exanil Plantig; Marc Edsel C. Ayes; Maria Rosario Singh-Vergeire; Maria Sofia L. Yangzon; Marielle M. Gamboa; Marissa Alejandria; Niña Francesca Bustamante; Razel Nikka M. Hao; Renato Jacinto Q. Mantaring; Rianna Patricia S. Cruz; Shiela Mae M. Araiza; Yvonne Valerie Austria; Zipporah Mariebelle R. Enriquez; Zyrel V. Mollejon                                                  |
| EPI_ISL_2859313,<br>EPI_ISL_2859323,<br>EPI_ISL_4742187,<br>EPI_ISL_4742235                                                                                                                                                                                                                                                                                                                                                                                                                                                                                                                                                                                                                                                                                                                                                                                                                       | University of the Philippines National<br>Institutes of Health (UP NIH)                 | Philippine Genome Center                                                             | Alethea R. de Guzman; Anna Ong-Lim; Arianne A. Zamora; Benedict A. Maralit; Carlo M. Lapid; Celia Carlos; Cynthia P. Saloma; Devon Ray Pacial; Diomedes A. Cariño; Edsel Maurice Salvana; Edsel Maurice Salvaña; El King D. Morado; Elcid Aaron R. Pangilinan; Eva Maria Cutiongco-de la Paz; Francis A. Tablizo; Henrietta Marie Rodriguez; Jaime C. Montoya; Jan Michael C. Yap; Jarvin E. Nipales; Jo-Hannah S. Llamas; John Q. Wong; Joshua Gregor A. Dizon; Juan Antonio R. Magalang; Karol Sophia Agape R. Padilla; Kenneth M. Kim; Kris P. Punayan; Kristina Patriz Dela Cruz; Lindsay Claire D.L. Carandang; Lindsay Clare D.L. Carandang; Ma. Exanil Plantig; Marc Edsel C. Ayes; Maria Rosario Singh-Vergeire; Maria Sofia L. Yangzon; Marielle M. Gamboa; Marissa Alejandria; Niña Francesca Bustamante; Razel Nikka M. Hao; Renato Jacinto Q. Mantaring; Rianna Patricia S. Cruz; Shiela Mae M. Araiza; Yvonne Valerie Austria; Zipporah Mariebelle R. Enriquez; Zyrel V. Mollejon                                        |
| EPI_ISL_2769141,<br>EPI_ISL_2769142                                                                                                                                                                                                                                                                                                                                                                                                                                                                                                                                                                                                                                                                                                                                                                                                                                                               | UniversitätsSpital Zürich                                                               | Institute of Medical Virology                                                        | Alexandra Trklo; Annette Audigé; Cyril Shah; Gabriela Ziltener; Guido Bloemberg; Jon Huder; Jürg Böni; Kevin Steiner; Maria Grünberg; Maryam Zaheri; Michael Huber; Riccarda Capaul; Stefan Schmutz; Verena Kufner                                                                                                                                                                                                                                                                                                                                                                                                                                                                                                                                                                                                                                                                                                                                                                                                                    |
| EPI_ISL_2469924<br>EPI_ISL_2845645,<br>EPI_ISL_2845648                                                                                                                                                                                                                                                                                                                                                                                                                                                                                                                                                                                                                                                                                                                                                                                                                                            | Universitätsklinikum Heidelberg<br>Universitätsklinikum Köln; Institut für<br>Virologie | Robert Koch Institute<br>Robert Koch Institute                                       |                                                                                                                                                                                                                                                                                                                                                                                                                                                                                                                                                                                                                                                                                                                                                                                                                                                                                                                                                                                                                                       |
| EPI_ISL_5904576,<br>EPI_ISL_5904584,<br>EPI_ISL_5904585,<br>EPI_ISL_5905874                                                                                                                                                                                                                                                                                                                                                                                                                                                                                                                                                                                                                                                                                                                                                                                                                       | Universitätsklinikum Ulm - Institut für<br>Virologie                                    | Robert Koch Institute                                                                |                                                                                                                                                                                                                                                                                                                                                                                                                                                                                                                                                                                                                                                                                                                                                                                                                                                                                                                                                                                                                                       |
| EPI_ISL_2844877                                                                                                                                                                                                                                                                                                                                                                                                                                                                                                                                                                                                                                                                                                                                                                                                                                                                                   | Universitätsklinikum des Saarlandes -<br>Institut für Virologie                         | Robert Koch Institute                                                                |                                                                                                                                                                                                                                                                                                                                                                                                                                                                                                                                                                                                                                                                                                                                                                                                                                                                                                                                                                                                                                       |
| EPI_ISL_3342366, EPI_ISL_3342371, EPI_ISL_3342373, EPI_ISL_3342395, EPI_ISL_3342398, EPI_ISL_3342403, EPI_ISL_3342410                                                                                                                                                                                                                                                                                                                                                                                                                                                                                                                                                                                                                                                                                                                                                                             | see above                                                                               | Upington laboratory                                                                  | National Institute for Communicable<br>Diseases of the National Health<br>Laboratory Service                                                                                                                                                                                                                                                                                                                                                                                                                                                                                                                                                                                                                                                                                                                                                                                                                                                                                                                                          |
| EPI_ISL_3506970                                                                                                                                                                                                                                                                                                                                                                                                                                                                                                                                                                                                                                                                                                                                                                                                                                                                                   | Usansolo-Galdakao University Hospital                                                   | Cruces University Hospital                                                           | Ana Belén de la Hoz; Ana Gual-de-Torrella; Izaskun Alejo-Cancho; Mikel Gallego                                                                                                                                                                                                                                                                                                                                                                                                                                                                                                                                                                                                                                                                                                                                                                                                                                                                                                                                                        |
| EPI_ISL_2456698, EPI_ISL_2458463, EPI_ISL_2678923, EPI_ISL_2678988, EPI_ISL_2679374, EPI_ISL_2679376, EPI_ISL_2679441, EPI_ISL_2679473, EPI_ISL_2679475, EPI_ISL_2679475, EPI_ISL_2856229, EPI_ISL_2856332, EPI_ISL_2856638, EPI_ISL_2856932, EPI_ISL_3269760                                                                                                                                                                                                                                                                                                                                                                                                                                                                                                                                                                                                                                     | see above                                                                               | Utah Public Health Laboratory                                                        | Erin L. Young; Kelly F. Oakeson; Olinto Linares-Perdomo; Tara Gallagher                                                                                                                                                                                                                                                                                                                                                                                                                                                                                                                                                                                                                                                                                                                                                                                                                                                                                                                                                               |
| EPI_ISL_2382659, EPI_ISL_2382664, EPI_ISL_2382665, EPI_ISL_2382667, EPI_ISL_2382668, EPI_ISL_2382671, EPI_ISL_2382673                                                                                                                                                                                                                                                                                                                                                                                                                                                                                                                                                                                                                                                                                                                                                                             | see above                                                                               | VERMAAK                                                                              | National Institute for Communicable<br>Diseases of the National Health<br>Laboratory Service                                                                                                                                                                                                                                                                                                                                                                                                                                                                                                                                                                                                                                                                                                                                                                                                                                                                                                                                          |
| EPI_ISL_2662476, EPI_ISL_2662478, EPI_ISL_2662529, EPI_ISL_2662530, EPI_ISL_2662531, EPI_ISL_2662533, EPI_ISL_2662536, EPI_ISL_2662537                                                                                                                                                                                                                                                                                                                                                                                                                                                                                                                                                                                                                                                                                                                                                            | see above                                                                               | VERMAAK LABORATORY                                                                   | National Institute for Communicable<br>Diseases of the National Health<br>Laboratory Service                                                                                                                                                                                                                                                                                                                                                                                                                                                                                                                                                                                                                                                                                                                                                                                                                                                                                                                                          |
| EPI_ISL_3501671,<br>EPI_ISL_3501686,<br>EPI_ISL_3501894,<br>EPI_ISL_3667123,<br>EPI_ISL_3667132                                                                                                                                                                                                                                                                                                                                                                                                                                                                                                                                                                                                                                                                                                                                                                                                   | VIROLOGY LABORATORY-CHU NICE                                                            | VIROLOGY LABORATORY-CHU NICE                                                         | Aicha El Yakine; Geraldine Gonfrier; Jean Machowiak; Sebastien Vitale; Valerie Giordanengo; Virginie Flahou                                                                                                                                                                                                                                                                                                                                                                                                                                                                                                                                                                                                                                                                                                                                                                                                                                                                                                                           |
| EPI_ISL_4714647, EPI_ISL_4714800, EPI_ISL_4715028, EPI_ISL_4715222, EPI_ISL_4715247, EPI_ISL_4741567, EPI_ISL_4742087, EPI_ISL_4742088, EPI_ISL_4742094, EPI_ISL_4742116, EPI_ISL_4742117, EPI_ISL_4742118, EPI_ISL_4742122, EPI_ISL_4742133, EPI_ISL_4742147, EPI_ISL_4742150, EPI_ISL_4742158, EPI_ISL_4742159, EPI_ISL_4742178, EPI_ISL_4742184, EPI_ISL_4742186, EPI_ISL_4742189, EPI_ISL_4742190, EPI_ISL_4742193, EPI_ISL_4742205, EPI_ISL_4742209, EPI_ISL_4742210, EPI_ISL_4742211, EPI_ISL_4742212, EPI_ISL_4742223, EPI_ISL_4742228, EPI_ISL_4742239, EPI_ISL_4742242, EPI_ISL_4742245, EPI_ISL_4742255, EPI_ISL_4742260, EPI_ISL_4742265, EPI_ISL_4742266                                                                                                                                                                                                                              | see above                                                                               | VITALAB Molecular Laboratory                                                         | Philippine Genome Center<br>Alethea R. de Guzman; Anna Ong-Lim; Arianne A. Zamora; Benedict A. Maralit; Carlo M. Lapid; Celia Carlos; Cynthia P. Saloma; Devon Ray Pacial; Diomedes A. Cariño; Edsel Maurice Salvana; El King D. Morado; Elcid Aaron R. Pangilinan; Eva Maria Cutiongco-de la Paz; Francis A. Tablizo; Henrietta Marie Rodriguez; Jaime C. Montoya; Jan Michael C. Yap; Jarvin E. Nipales; Jo-Hannah S. Llamas; John Q. Wong; Joshua Gregor A. Dizon; Juan Antonio R. Magalang; Karol Sophia Agape R. Padilla; Kenneth M. Kim; Kris P. Punayan; Kristina Patriz Dela Cruz; Lindsay Clare D.L. Carandang; Ma. Exanil Plantig; Marc Edsel C. Ayes; Maria Rosario Singh-Vergeire; Maria Sofia L. Yangzon; Marielle M. Gamboa; Marissa Alejandria; Niña Francesca Bustamante; Razel Nikka M. Hao; Renato Jacinto Q. Mantaring; Rianna Patricia S. Cruz; Shiela Mae M. Araiza; Yvonne Valerie Austria; Zipporah Mariebelle R. Enriquez; Zyrel V. Mollejon                                                                  |
| EPI_ISL_2495054, EPI_ISL_3447848, EPI_ISL_3447849, EPI_ISL_3447852, EPI_ISL_3447853, EPI_ISL_3447854, EPI_ISL_3729080                                                                                                                                                                                                                                                                                                                                                                                                                                                                                                                                                                                                                                                                                                                                                                             | see above                                                                               | Vaccines and Infectious Diseases<br>Analytics Research Unit (VIDA)                   | KRISP, KZn Research Innovation and<br>Sequencing Platform<br>Baillie Vicky; Giandhari Jennifer; Madhi Shabir; Naidoo Yeshnee; Pillay Sureshnee; San James; Tegally Houriyah; Tshabula Derek; Wilkinson Eduan; Yajna Ramphal; de Oliveira Tulio; du Plessis Jeanine                                                                                                                                                                                                                                                                                                                                                                                                                                                                                                                                                                                                                                                                                                                                                                    |
| EPI_ISL_2494627,<br>EPI_ISL_2494628                                                                                                                                                                                                                                                                                                                                                                                                                                                                                                                                                                                                                                                                                                                                                                                                                                                               | Vaccines and Infectious Diseases<br>Analytics Research Unit (VIDA)                      | KRISP, KZn Research Innovation and<br>Sequencing Platform                            | Baillie Vicky; Giandhari Jennifer; Madhi Shabir; Naidoo Yeshnee; Pillay Sureshnee; San James; Tegally Houriyah; Tshabula Derek; Wilkinson Eduan; de Oliveira Tulio; du Plessis Jeanine                                                                                                                                                                                                                                                                                                                                                                                                                                                                                                                                                                                                                                                                                                                                                                                                                                                |
| EPI_ISL_2420189                                                                                                                                                                                                                                                                                                                                                                                                                                                                                                                                                                                                                                                                                                                                                                                                                                                                                   | Valais Hospital, Central Institute                                                      | Valais Hospital, Central Institute                                                   | Alexis Dumoulin; Deborah Penet; Emmanouil Dermitzakis; Henri Pegeot; Ioannis Xenarios; Keith Harshman; Lorenzo Cerutti; Melyssa Elies                                                                                                                                                                                                                                                                                                                                                                                                                                                                                                                                                                                                                                                                                                                                                                                                                                                                                                 |
| EPI_ISL_5540417, EPI_ISL_5540467, EPI_ISL_5540500, EPI_ISL_5540524, EPI_ISL_5540537, EPI_ISL_5543965, EPI_ISL_5562360                                                                                                                                                                                                                                                                                                                                                                                                                                                                                                                                                                                                                                                                                                                                                                             | see above                                                                               | Valenzuela Hope Molecular Laboratory                                                 | Philippine Genome Center<br>Alethea R. de Guzman; Alyssa Joyce E. Telles; Anna Ong-Lim; Arianne A. Zamora; Benedict A. Maralit; Carlo M. Lapid; Celia Carlos; Cynthia P. Saloma; Devon Ray Pacial; Diomedes A. Cariño; Edsel Maurice Salvana; El King D. Morado; Elcid Aaron R. Pangilinan; Eva Maria Cutiongco-de la Paz; Francis A. Tablizo; Henrietta Marie Rodriguez; Jaime C. Montoya; Jan Michael C. Yap; Jarvin E. Nipales; Jo-Hannah S. Llamas; John Michael Egana; John Q. Wong; Joshua Gregor A. Dizon; Joshua Jose Endozo; Juan Antonio R. Magalang; Karol Sophia Agape R. Padilla; Kenneth M. Kim; Kris P. Punayan; Kristina Patriz Dela Cruz; Lindsay Clare D.L. Carandang; Ma. Exanil Plantig; Marc Edsel C. Ayes; Maria Rosario Singh-Vergeire; Maria Sofia L. Yangzon; Marielle M. Gamboa; Mariella Alejandria; Niña Francesca Bustamante; Razel Nikka M. Hao; Renato Jacinto Q. Mantaring; Rianna Patricia S. Cruz; Shiela Mae M. Araiza; Yvonne Valerie Austria; Zipporah Mariebelle R. Enriquez; Zyrel V. Mollejon |
| EPI_ISL_2582723, EPI_ISL_2582730, EPI_ISL_2582736, EPI_ISL_2582746, EPI_ISL_2582748, EPI_ISL_2582754, EPI_ISL_2582790, EPI_ISL_2582800                                                                                                                                                                                                                                                                                                                                                                                                                                                                                                                                                                                                                                                                                                                                                            | see above                                                                               | Vermaak & Partners Laboratory                                                        | National Institute for Communicable<br>Diseases of the National Health<br>Laboratory Service                                                                                                                                                                                                                                                                                                                                                                                                                                                                                                                                                                                                                                                                                                                                                                                                                                                                                                                                          |

| Laboratory Service                                                                                                                                                                                                                                                                                                                                                                                                                                                                                                                                                                                                                                                                                                                                                                                                                                                                                                                                                                                                                                                                                                                                                                                                                                                                                                                                                                                                                                                                                                                                                                                                                                                                                                                                                                                                                                                                                                          |                                                                                                 |                                                                                                 |                                                                                                                                                                                                                                                                                                                                                                                                                                                                                                                                                                                                                                                                                                                                                                                                                                                                                                                                        |                                                                                                                                                                                                                                                                                                                                                                                                                                                                                                                                                                                                                                                                                                                                                                                                                                                                                                                                        |
|-----------------------------------------------------------------------------------------------------------------------------------------------------------------------------------------------------------------------------------------------------------------------------------------------------------------------------------------------------------------------------------------------------------------------------------------------------------------------------------------------------------------------------------------------------------------------------------------------------------------------------------------------------------------------------------------------------------------------------------------------------------------------------------------------------------------------------------------------------------------------------------------------------------------------------------------------------------------------------------------------------------------------------------------------------------------------------------------------------------------------------------------------------------------------------------------------------------------------------------------------------------------------------------------------------------------------------------------------------------------------------------------------------------------------------------------------------------------------------------------------------------------------------------------------------------------------------------------------------------------------------------------------------------------------------------------------------------------------------------------------------------------------------------------------------------------------------------------------------------------------------------------------------------------------------|-------------------------------------------------------------------------------------------------|-------------------------------------------------------------------------------------------------|----------------------------------------------------------------------------------------------------------------------------------------------------------------------------------------------------------------------------------------------------------------------------------------------------------------------------------------------------------------------------------------------------------------------------------------------------------------------------------------------------------------------------------------------------------------------------------------------------------------------------------------------------------------------------------------------------------------------------------------------------------------------------------------------------------------------------------------------------------------------------------------------------------------------------------------|----------------------------------------------------------------------------------------------------------------------------------------------------------------------------------------------------------------------------------------------------------------------------------------------------------------------------------------------------------------------------------------------------------------------------------------------------------------------------------------------------------------------------------------------------------------------------------------------------------------------------------------------------------------------------------------------------------------------------------------------------------------------------------------------------------------------------------------------------------------------------------------------------------------------------------------|
| EPI_ISL_2375981, EPI_ISL_2375990, EPI_ISL_2375993, EPI_ISL_2375995, EPI_ISL_2621104, EPI_ISL_2802144, EPI_ISL_2802145, EPI_ISL_2802146, EPI_ISL_2802162, EPI_ISL_2802163, EPI_ISL_2802168, EPI_ISL_2802178, EPI_ISL_2802179, EPI_ISL_3506423, EPI_ISL_3506433, EPI_ISL_3506436, EPI_ISL_3957779, EPI_ISL_3957780, EPI_ISL_3957792, EPI_ISL_3957793, EPI_ISL_5524583, EPI_ISL_5524587, EPI_ISL_5524642, EPI_ISL_5524643, EPI_ISL_5524649, EPI_ISL_5524651                                                                                                                                                                                                                                                                                                                                                                                                                                                                                                                                                                                                                                                                                                                                                                                                                                                                                                                                                                                                                                                                                                                                                                                                                                                                                                                                                                                                                                                                    |                                                                                                 |                                                                                                 |                                                                                                                                                                                                                                                                                                                                                                                                                                                                                                                                                                                                                                                                                                                                                                                                                                                                                                                                        |                                                                                                                                                                                                                                                                                                                                                                                                                                                                                                                                                                                                                                                                                                                                                                                                                                                                                                                                        |
| see above                                                                                                                                                                                                                                                                                                                                                                                                                                                                                                                                                                                                                                                                                                                                                                                                                                                                                                                                                                                                                                                                                                                                                                                                                                                                                                                                                                                                                                                                                                                                                                                                                                                                                                                                                                                                                                                                                                                   | Victoria Hospital wc VHW                                                                        | NHLS/UCT                                                                                        | Arash Iranzadeh; Bruna Galvao; Carolyn Williamson; Deelan Doolabh; Diana Hardie; Gert Marais; Innocent Mudau; Kruger Marais; Lynn Tyers; Marvin Hsiao; Rageema Joseph; Sisonke; Stephen Korsman                                                                                                                                                                                                                                                                                                                                                                                                                                                                                                                                                                                                                                                                                                                                        |                                                                                                                                                                                                                                                                                                                                                                                                                                                                                                                                                                                                                                                                                                                                                                                                                                                                                                                                        |
| EPI_ISL_2920929, EPI_ISL_2920953                                                                                                                                                                                                                                                                                                                                                                                                                                                                                                                                                                                                                                                                                                                                                                                                                                                                                                                                                                                                                                                                                                                                                                                                                                                                                                                                                                                                                                                                                                                                                                                                                                                                                                                                                                                                                                                                                            | Victorian Infectious Diseases Reference Laboratory (VIDRL)                                      | VIDRL and MDU-PHL                                                                               | Caly L.; Druce J.; M.L.; N.L.; Sait; Seemant T.; Sherry                                                                                                                                                                                                                                                                                                                                                                                                                                                                                                                                                                                                                                                                                                                                                                                                                                                                                |                                                                                                                                                                                                                                                                                                                                                                                                                                                                                                                                                                                                                                                                                                                                                                                                                                                                                                                                        |
| EPI_ISL_2374957, EPI_ISL_2375390, EPI_ISL_2662306, EPI_ISL_2662429, EPI_ISL_2662437, EPI_ISL_2820558                                                                                                                                                                                                                                                                                                                                                                                                                                                                                                                                                                                                                                                                                                                                                                                                                                                                                                                                                                                                                                                                                                                                                                                                                                                                                                                                                                                                                                                                                                                                                                                                                                                                                                                                                                                                                        | Viollier AG                                                                                     | Department of Biosystems Science and Engineering, ETH Zürich                                    | Andrea Patrignani; Andrea Patrizia Salzmann; Andreia Cabral de Gouveia; Catharine Aquino; Chaoran Chen; Christian Beisel; Christiane Beckmann; Christoph Noppen; Daniel Ehrsam; David Drefuss; Doris Popovic; Elodie Burcklen; Griffin White; Henriette Kurth; Ina Nissen; Isabel Stürmer; Ivan Topolsky; Jay Tracy; Katharina Jahn; Kim Philipp Jablonski; Lara Fuhrmann; Laura Neff; Lennart Opitz; Maria Domènica Moccia; Maurice Redondo; Mirjam Feldkamp; Natascia Santacroce; Niko Beerenwinkel; Noemie Santamaria de Souza; Olivier Kobel; Philipp Jablonski; Ralph Schlapbach; Rebecca Denes; Sarah Nadeau; Simon Grüter; Sophie Seidel; Tanja Stadler; Timothy Sykes                                                                                                                                                                                                                                                          |                                                                                                                                                                                                                                                                                                                                                                                                                                                                                                                                                                                                                                                                                                                                                                                                                                                                                                                                        |
| EPI_ISL_2420697, EPI_ISL_2420700, EPI_ISL_2420701                                                                                                                                                                                                                                                                                                                                                                                                                                                                                                                                                                                                                                                                                                                                                                                                                                                                                                                                                                                                                                                                                                                                                                                                                                                                                                                                                                                                                                                                                                                                                                                                                                                                                                                                                                                                                                                                           | Viollier AG                                                                                     | Viollier AG                                                                                     | Andrea Patrizia Salzmann; Christiane Beckmann; Christoph Noppen; Henriette Kurth; Maurice Redondo; Olivier Kobel                                                                                                                                                                                                                                                                                                                                                                                                                                                                                                                                                                                                                                                                                                                                                                                                                       |                                                                                                                                                                                                                                                                                                                                                                                                                                                                                                                                                                                                                                                                                                                                                                                                                                                                                                                                        |
| EPI_ISL_2425456, EPI_ISL_2425469                                                                                                                                                                                                                                                                                                                                                                                                                                                                                                                                                                                                                                                                                                                                                                                                                                                                                                                                                                                                                                                                                                                                                                                                                                                                                                                                                                                                                                                                                                                                                                                                                                                                                                                                                                                                                                                                                            | Virginia Division of Consolidated Laboratory Services                                           | Virginia Division of Consolidated Laboratory Services                                           | Virginia DCLS                                                                                                                                                                                                                                                                                                                                                                                                                                                                                                                                                                                                                                                                                                                                                                                                                                                                                                                          |                                                                                                                                                                                                                                                                                                                                                                                                                                                                                                                                                                                                                                                                                                                                                                                                                                                                                                                                        |
| EPI_ISL_3506340, EPI_ISL_3506342, EPI_ISL_3506344, EPI_ISL_3506346                                                                                                                                                                                                                                                                                                                                                                                                                                                                                                                                                                                                                                                                                                                                                                                                                                                                                                                                                                                                                                                                                                                                                                                                                                                                                                                                                                                                                                                                                                                                                                                                                                                                                                                                                                                                                                                          | Virology Laboratory, International Centre for Diarrhoeal Disease Research, Bangladesh (ICDDR,B) | Virology Laboratory, International Centre for Diarrhoeal Disease Research, Bangladesh (ICDDR,B) | Md. Mahfuzur Rahman; Mohammad Enayet Hossain; Mohammed Ziaur Rahman; Mojnu Miah; Mustafizur Rahman                                                                                                                                                                                                                                                                                                                                                                                                                                                                                                                                                                                                                                                                                                                                                                                                                                     |                                                                                                                                                                                                                                                                                                                                                                                                                                                                                                                                                                                                                                                                                                                                                                                                                                                                                                                                        |
| EPI_ISL_4297552, EPI_ISL_4297554, EPI_ISL_4297558, EPI_ISL_4297559, EPI_ISL_4297560, EPI_ISL_4297561, EPI_ISL_4297562, EPI_ISL_4297563, EPI_ISL_4297567, EPI_ISL_4297569, EPI_ISL_4297571, EPI_ISL_4297573, EPI_ISL_4297574, EPI_ISL_4297575, EPI_ISL_4297576, EPI_ISL_4297577, EPI_ISL_4297578, EPI_ISL_4297579, EPI_ISL_4297580, EPI_ISL_4297581, EPI_ISL_4297582, EPI_ISL_4297583, EPI_ISL_4297584, EPI_ISL_4297585, EPI_ISL_4297586, EPI_ISL_4297587, EPI_ISL_4297588, EPI_ISL_4297589, EPI_ISL_4297590, EPI_ISL_4297592, EPI_ISL_4297594, EPI_ISL_4297595, EPI_ISL_4297597, EPI_ISL_4297598, EPI_ISL_4297600, EPI_ISL_4297601, EPI_ISL_4297602, EPI_ISL_4297603, EPI_ISL_4297604, EPI_ISL_4297606, EPI_ISL_4297607, EPI_ISL_4297608, EPI_ISL_4297609, EPI_ISL_4297610, EPI_ISL_4297611, EPI_ISL_4297612, EPI_ISL_4297613, EPI_ISL_4297614, EPI_ISL_4297615, EPI_ISL_4297616, EPI_ISL_4297617, EPI_ISL_4297618, EPI_ISL_4297619, EPI_ISL_4297621, EPI_ISL_4297622, EPI_ISL_4297623, EPI_ISL_4297624, EPI_ISL_4297625, EPI_ISL_4297626, EPI_ISL_4297627, EPI_ISL_4297628, EPI_ISL_4297629, EPI_ISL_4297630, EPI_ISL_4297633, EPI_ISL_4297634, EPI_ISL_4297636, EPI_ISL_4297637, EPI_ISL_4297638, EPI_ISL_4297639, EPI_ISL_4297640, EPI_ISL_4297642, EPI_ISL_4297643, EPI_ISL_4297644, EPI_ISL_4297645, EPI_ISL_4297678, EPI_ISL_4297684, EPI_ISL_4297705, EPI_ISL_4297729, EPI_ISL_4297731, EPI_ISL_4297732, EPI_ISL_4297734, EPI_ISL_4297735, EPI_ISL_4297737, EPI_ISL_4297738, EPI_ISL_4297739, EPI_ISL_4297740, EPI_ISL_4297741, EPI_ISL_4297742, EPI_ISL_4297744, EPI_ISL_4297745, EPI_ISL_4297746, EPI_ISL_4297749, EPI_ISL_4297751, EPI_ISL_4297752, EPI_ISL_4297753, EPI_ISL_4297754, EPI_ISL_4297755, EPI_ISL_4297756, EPI_ISL_4297757, EPI_ISL_4297758, EPI_ISL_4297762, EPI_ISL_4297763, EPI_ISL_4297764, EPI_ISL_4297766, EPI_ISL_4297767, EPI_ISL_4297768, EPI_ISL_4297770, EPI_ISL_4297771, EPI_ISL_4297772 |                                                                                                 |                                                                                                 | Andry Andrianarivelo; Angela Brisebarre; Camille Capel; Cara E. Brook; Christian Ranaivoson; Christophe Malabat; Corinne Maufrais; Cristina M. Tato; Emmanuelle Permal; Etienne Simon-Lorière; Frédéric Lemoine; Helisoa Razafimanjato; Joseph L. DeRisi; Louise Lefrançois; Marion Barbet; Maud Vanpee; Michelle Tan; Méline Bizard; Norosoa Razanajatovo; Philippe Dussart; Soa Fy Andriamandimby; Sylvie Behilli; Sylvie van der Werf; Tsiry Randriambolanantsosa; Vida Ahyong; Vincent Enouf; Vololoinaina Raharinosy; Zely Arivelo Randriamanantany                                                                                                                                                                                                                                                                                                                                                                               |                                                                                                                                                                                                                                                                                                                                                                                                                                                                                                                                                                                                                                                                                                                                                                                                                                                                                                                                        |
| see above                                                                                                                                                                                                                                                                                                                                                                                                                                                                                                                                                                                                                                                                                                                                                                                                                                                                                                                                                                                                                                                                                                                                                                                                                                                                                                                                                                                                                                                                                                                                                                                                                                                                                                                                                                                                                                                                                                                   | Virology Unit, Institut Pasteur de Madagascar                                                   | Virology Unit, Institut Pasteur de Madagascar                                                   | Andry Andrianarivelo; Angela Brisebarre; Camille Capel; Cara E. Brook; Christian Ranaivoson; Christophe Malabat; Corinne Maufrais; Cristina M. Tato; Emmanuelle Permal; Etienne Simon-Lorière; Frédéric Lemoine; Helisoa Razafimanjato; Joseph L. DeRisi; Louise Lefrançois; Marion Barbet; Maud Vanpee; Michelle Tan; Méline Bizard; Norosoa Razanajatovo; Philippe Dussart; Soa Fy Andriamandimby; Sylvie Behilli; Sylvie van der Werf; Tsiry Randriambolanantsosa; Vida Ahyong; Vincent Enouf; Vololoinaina Raharinosy; Zely Arivelo Randriamanantany                                                                                                                                                                                                                                                                                                                                                                               |                                                                                                                                                                                                                                                                                                                                                                                                                                                                                                                                                                                                                                                                                                                                                                                                                                                                                                                                        |
| EPI_ISL_2364019, EPI_ISL_2364023, EPI_ISL_2505596, EPI_ISL_2506292, EPI_ISL_2506647, EPI_ISL_2506934, EPI_ISL_2506935, EPI_ISL_2506937, EPI_ISL_2506941, EPI_ISL_2506942, EPI_ISL_2507535, EPI_ISL_2507753, EPI_ISL_2507963, EPI_ISL_2507964, EPI_ISL_2507966, EPI_ISL_3832051                                                                                                                                                                                                                                                                                                                                                                                                                                                                                                                                                                                                                                                                                                                                                                                                                                                                                                                                                                                                                                                                                                                                                                                                                                                                                                                                                                                                                                                                                                                                                                                                                                              | Vita Laboratoriot Oy                                                                            | Expert Microbiology, National Institute for Health and Welfare                                  | Carita Savolainen-Kopra; Erika Lindh; Haider al-Hello; Jani Halkilaiti; Kirsi Liitsola; Niina Ikonen; Olli Vapalahti; Pekka Elonen; Phuoc Truong; Päivi Laurila; Ravi Kant; Sari Hannula; Soile Blomqvist; Teemu Smura                                                                                                                                                                                                                                                                                                                                                                                                                                                                                                                                                                                                                                                                                                                 |                                                                                                                                                                                                                                                                                                                                                                                                                                                                                                                                                                                                                                                                                                                                                                                                                                                                                                                                        |
| EPI_ISL_5537850, EPI_ISL_5539103, EPI_ISL_5539191, EPI_ISL_5539241, EPI_ISL_5539323, EPI_ISL_5540286, EPI_ISL_5540416, EPI_ISL_5540427, EPI_ISL_5540471, EPI_ISL_5541091, EPI_ISL_5541158, EPI_ISL_5541269, EPI_ISL_5541399, EPI_ISL_5543243, EPI_ISL_5543251, EPI_ISL_5543254, EPI_ISL_5543264, EPI_ISL_5544034, EPI_ISL_5544047, EPI_ISL_5544068, EPI_ISL_5544114                                                                                                                                                                                                                                                                                                                                                                                                                                                                                                                                                                                                                                                                                                                                                                                                                                                                                                                                                                                                                                                                                                                                                                                                                                                                                                                                                                                                                                                                                                                                                         | see above                                                                                       | Vitalab Molecular                                                                               | Philippine Genome Center                                                                                                                                                                                                                                                                                                                                                                                                                                                                                                                                                                                                                                                                                                                                                                                                                                                                                                               |                                                                                                                                                                                                                                                                                                                                                                                                                                                                                                                                                                                                                                                                                                                                                                                                                                                                                                                                        |
| EPI_ISL_6010144                                                                                                                                                                                                                                                                                                                                                                                                                                                                                                                                                                                                                                                                                                                                                                                                                                                                                                                                                                                                                                                                                                                                                                                                                                                                                                                                                                                                                                                                                                                                                                                                                                                                                                                                                                                                                                                                                                             | Vredenburg Clinic wc VBC                                                                        | NHLS/UCT                                                                                        | Arash Iranzadeh; Bruna Galvao; Carolyn Williamson; Deelan Doolabh; Diana Hardie; Gert Marais; Innocent Mudau; Lynn Tyers; Marvin Hsiao; Rageema Joseph; Stephen Korsman                                                                                                                                                                                                                                                                                                                                                                                                                                                                                                                                                                                                                                                                                                                                                                |                                                                                                                                                                                                                                                                                                                                                                                                                                                                                                                                                                                                                                                                                                                                                                                                                                                                                                                                        |
| EPI_ISL_6436408                                                                                                                                                                                                                                                                                                                                                                                                                                                                                                                                                                                                                                                                                                                                                                                                                                                                                                                                                                                                                                                                                                                                                                                                                                                                                                                                                                                                                                                                                                                                                                                                                                                                                                                                                                                                                                                                                                             | Vredenburg Hospital wc VBG                                                                      | NHLS/UCT                                                                                        | Arash Iranzadeh; Bruna Galvao; Carolyn Williamson; Deelan Doolabh; Diana Hardie; Gert Marais; Innocent Mudau; Lynn Tyers; Marvin Hsiao; Rageema Joseph; Stephen Korsman                                                                                                                                                                                                                                                                                                                                                                                                                                                                                                                                                                                                                                                                                                                                                                |                                                                                                                                                                                                                                                                                                                                                                                                                                                                                                                                                                                                                                                                                                                                                                                                                                                                                                                                        |
| EPI_ISL_3207499                                                                                                                                                                                                                                                                                                                                                                                                                                                                                                                                                                                                                                                                                                                                                                                                                                                                                                                                                                                                                                                                                                                                                                                                                                                                                                                                                                                                                                                                                                                                                                                                                                                                                                                                                                                                                                                                                                             | Vredendal Central Clinic wc VDC                                                                 | NHLS/UCT                                                                                        | Arash Iranzadeh; Bruna Galvao; Carolyn Williamson; Deelan Doolabh; Diana Hardie; Gert Marais; Innocent Mudau; Lynn Tyers; Marvin Hsiao; Rageema Joseph; Sisonke; Stephen Korsman                                                                                                                                                                                                                                                                                                                                                                                                                                                                                                                                                                                                                                                                                                                                                       |                                                                                                                                                                                                                                                                                                                                                                                                                                                                                                                                                                                                                                                                                                                                                                                                                                                                                                                                        |
| EPI_ISL_4816943, EPI_ISL_5524606                                                                                                                                                                                                                                                                                                                                                                                                                                                                                                                                                                                                                                                                                                                                                                                                                                                                                                                                                                                                                                                                                                                                                                                                                                                                                                                                                                                                                                                                                                                                                                                                                                                                                                                                                                                                                                                                                            | Vredendal Hospital wc VRE                                                                       | NHLS/UCT                                                                                        | Arash Iranzadeh; Bruna Galvao; Carolyn Williamson; Deelan Doolabh; Diana Hardie; Gert Marais; Innocent Mudau; Lynn Tyers; Marvin Hsiao; Rageema Joseph; Stephen Korsman                                                                                                                                                                                                                                                                                                                                                                                                                                                                                                                                                                                                                                                                                                                                                                |                                                                                                                                                                                                                                                                                                                                                                                                                                                                                                                                                                                                                                                                                                                                                                                                                                                                                                                                        |
| EPI_ISL_2547363                                                                                                                                                                                                                                                                                                                                                                                                                                                                                                                                                                                                                                                                                                                                                                                                                                                                                                                                                                                                                                                                                                                                                                                                                                                                                                                                                                                                                                                                                                                                                                                                                                                                                                                                                                                                                                                                                                             | Vredendal Hospital wc VRE                                                                       | National Health Laboratory Service/University of Cape Town (NHLS/UCT)                           | Arash Iranzadeh; Bruna Galvao; Carolyn Williamson; Deelan Doolabh; Diana Hardie; Gert Marais; Innocent Mudau; Lynn Tyers; Marvin Hsiao; Stephen Korsman                                                                                                                                                                                                                                                                                                                                                                                                                                                                                                                                                                                                                                                                                                                                                                                |                                                                                                                                                                                                                                                                                                                                                                                                                                                                                                                                                                                                                                                                                                                                                                                                                                                                                                                                        |
| EPI_ISL_2375932                                                                                                                                                                                                                                                                                                                                                                                                                                                                                                                                                                                                                                                                                                                                                                                                                                                                                                                                                                                                                                                                                                                                                                                                                                                                                                                                                                                                                                                                                                                                                                                                                                                                                                                                                                                                                                                                                                             | Vredendal North Clinic wc VDN                                                                   | NHLS/UCT                                                                                        | Arash Iranzadeh; Bruna Galvao; Carolyn Williamson; Deelan Doolabh; Diana Hardie; Innocent Mudau; Kruger Marais; Lynn Tyers; Marvin Hsiao; Stephen Korsman                                                                                                                                                                                                                                                                                                                                                                                                                                                                                                                                                                                                                                                                                                                                                                              |                                                                                                                                                                                                                                                                                                                                                                                                                                                                                                                                                                                                                                                                                                                                                                                                                                                                                                                                        |
| EPI_ISL_2547367                                                                                                                                                                                                                                                                                                                                                                                                                                                                                                                                                                                                                                                                                                                                                                                                                                                                                                                                                                                                                                                                                                                                                                                                                                                                                                                                                                                                                                                                                                                                                                                                                                                                                                                                                                                                                                                                                                             | Vredendal North Clinic wc VDN                                                                   | National Health Laboratory Service/University of Cape Town (NHLS/UCT)                           | Arash Iranzadeh; Bruna Galvao; Carolyn Williamson; Deelan Doolabh; Diana Hardie; Gert Marais; Innocent Mudau; Lynn Tyers; Marvin Hsiao; Stephen Korsman                                                                                                                                                                                                                                                                                                                                                                                                                                                                                                                                                                                                                                                                                                                                                                                |                                                                                                                                                                                                                                                                                                                                                                                                                                                                                                                                                                                                                                                                                                                                                                                                                                                                                                                                        |
| EPI_ISL_2968001                                                                                                                                                                                                                                                                                                                                                                                                                                                                                                                                                                                                                                                                                                                                                                                                                                                                                                                                                                                                                                                                                                                                                                                                                                                                                                                                                                                                                                                                                                                                                                                                                                                                                                                                                                                                                                                                                                             | WACCBIP, University of Ghana, Accra, Ghana                                                      | WACCBIP, University of Ghana, Volta Road, Legon-Accra, Ghana                                    | Bright K. Yerni; Collins M. Morang'a; Deborah N. A. Mettler; Dominic S. Y. Amuzu; Evelyn B. Quansah; Frederick Tei-Maya; Israel Osei-Wusu; Joe K. Mutungi; Joyce M. Ngoi; Lucas N. Amenga-Etego and Gordon A. Awandare; Nicaise T. Ndam; Oliver Commey; Peter K Quashie; Philip M. Soglo; Samirah Saidi; Samuel Armoo; Vincent Appiah; Violette V. McCormack; William K. Ampofo; Yaw Bediako                                                                                                                                                                                                                                                                                                                                                                                                                                                                                                                                           |                                                                                                                                                                                                                                                                                                                                                                                                                                                                                                                                                                                                                                                                                                                                                                                                                                                                                                                                        |
| EPI_ISL_3354710, EPI_ISL_3354711, EPI_ISL_3354713                                                                                                                                                                                                                                                                                                                                                                                                                                                                                                                                                                                                                                                                                                                                                                                                                                                                                                                                                                                                                                                                                                                                                                                                                                                                                                                                                                                                                                                                                                                                                                                                                                                                                                                                                                                                                                                                           | WI State Laboratory of Hygiene                                                                  | Centers for Disease Control and Prevention Division of Viral Diseases, Pathogen Discovery       | Alex Burgin; Ben Rambo-Martin; Clinton Paden; Dakota Howard; Dave Wentworth; Dhvani Batra; Jasmine Padilla; Justin Lee; Krista Queen; Kristen Knipe; Kristine Lacey; Mark Burroughs; Matthew Schmerer; Meghan Bentz; Mili Sheth; Peter Cook; Sam Shepard; Sarah Nobles; Suxiang Tong; Vivien Dugan; Yvette Unoarumhi                                                                                                                                                                                                                                                                                                                                                                                                                                                                                                                                                                                                                   |                                                                                                                                                                                                                                                                                                                                                                                                                                                                                                                                                                                                                                                                                                                                                                                                                                                                                                                                        |
| EPI_ISL_3354878                                                                                                                                                                                                                                                                                                                                                                                                                                                                                                                                                                                                                                                                                                                                                                                                                                                                                                                                                                                                                                                                                                                                                                                                                                                                                                                                                                                                                                                                                                                                                                                                                                                                                                                                                                                                                                                                                                             | WVDHHR - Office of Laboratory Services                                                          | Centers for Disease Control and Prevention Division of Viral Diseases, Pathogen Discovery       | Alex Burgin; Ben Rambo-Martin; Clinton Paden; Dakota Howard; Dave Wentworth; Dhvani Batra; Jasmine Padilla; Justin Lee; Krista Queen; Kristen Knipe; Kristine Lacey; Mark Burroughs; Matthew Schmerer; Meghan Bentz; Mili Sheth; Peter Cook; Sam Shepard; Sarah Nobles; Suxiang Tong; Vivien Dugan; Yvette Unoarumhi                                                                                                                                                                                                                                                                                                                                                                                                                                                                                                                                                                                                                   |                                                                                                                                                                                                                                                                                                                                                                                                                                                                                                                                                                                                                                                                                                                                                                                                                                                                                                                                        |
| EPI_ISL_5524595                                                                                                                                                                                                                                                                                                                                                                                                                                                                                                                                                                                                                                                                                                                                                                                                                                                                                                                                                                                                                                                                                                                                                                                                                                                                                                                                                                                                                                                                                                                                                                                                                                                                                                                                                                                                                                                                                                             | Warrenton Hospital                                                                              | NHLS/UCT                                                                                        | Arash Iranzadeh; Bruna Galvao; Carolyn Williamson; Deelan Doolabh; Diana Hardie; Gert Marais; Innocent Mudau; Lynn Tyers; Marvin Hsiao; Rageema Joseph; Stephen Korsman                                                                                                                                                                                                                                                                                                                                                                                                                                                                                                                                                                                                                                                                                                                                                                |                                                                                                                                                                                                                                                                                                                                                                                                                                                                                                                                                                                                                                                                                                                                                                                                                                                                                                                                        |
| EPI_ISL_2378890                                                                                                                                                                                                                                                                                                                                                                                                                                                                                                                                                                                                                                                                                                                                                                                                                                                                                                                                                                                                                                                                                                                                                                                                                                                                                                                                                                                                                                                                                                                                                                                                                                                                                                                                                                                                                                                                                                             | Washington State Department of Health Public Health Laboratories                                | Washington State Department of Health Public Health Laboratories                                | Avi Singh; Darren Lucas; Denny Russel; Drew MacKellar; Geoff Melly; Hannah Gray; Joenice Gonzalez; JohnAric Peterson; Philip Dykema; Rebecca Cao; Vanessa De Los Santos                                                                                                                                                                                                                                                                                                                                                                                                                                                                                                                                                                                                                                                                                                                                                                |                                                                                                                                                                                                                                                                                                                                                                                                                                                                                                                                                                                                                                                                                                                                                                                                                                                                                                                                        |
| EPI_ISL_3246673                                                                                                                                                                                                                                                                                                                                                                                                                                                                                                                                                                                                                                                                                                                                                                                                                                                                                                                                                                                                                                                                                                                                                                                                                                                                                                                                                                                                                                                                                                                                                                                                                                                                                                                                                                                                                                                                                                             | Weill Cornell Medicine                                                                          | New York Genome Center                                                                          | Amy Baldwin; Andre Corvelo; Arryn Craney; Chris Mason; Dayna M. Oeschwald; Hanna Rennert; Lars F Westblade; Margaret Elizabeth Ross; Melissa Cushing; Michael Zody; Olivier Elemento; Priya Velu; Samantha Fennessey; Tom Maniatis                                                                                                                                                                                                                                                                                                                                                                                                                                                                                                                                                                                                                                                                                                     |                                                                                                                                                                                                                                                                                                                                                                                                                                                                                                                                                                                                                                                                                                                                                                                                                                                                                                                                        |
| EPI_ISL_6010166, EPI_ISL_6010170                                                                                                                                                                                                                                                                                                                                                                                                                                                                                                                                                                                                                                                                                                                                                                                                                                                                                                                                                                                                                                                                                                                                                                                                                                                                                                                                                                                                                                                                                                                                                                                                                                                                                                                                                                                                                                                                                            | Wesfleur Hospital wc WFH                                                                        | NHLS/UCT                                                                                        | Arash Iranzadeh; Bruna Galvao; Carolyn Williamson; Deelan Doolabh; Diana Hardie; Gert Marais; Innocent Mudau; Lynn Tyers; Marvin Hsiao; Rageema Joseph; Stephen Korsman                                                                                                                                                                                                                                                                                                                                                                                                                                                                                                                                                                                                                                                                                                                                                                |                                                                                                                                                                                                                                                                                                                                                                                                                                                                                                                                                                                                                                                                                                                                                                                                                                                                                                                                        |
| EPI_ISL_2422540, EPI_ISL_2422562, EPI_ISL_2422567                                                                                                                                                                                                                                                                                                                                                                                                                                                                                                                                                                                                                                                                                                                                                                                                                                                                                                                                                                                                                                                                                                                                                                                                                                                                                                                                                                                                                                                                                                                                                                                                                                                                                                                                                                                                                                                                           | West African Centre for Cell Biology of Infectious Pathogen, University of Ghana, Legon         | WACCBIP, University of Ghana, Volta Road, Legon, Accra                                          | Collins M. Morang'a; Dominic S.Y. Amuzu; Evelyn B. Quansah; Evelyn Y Bonney; Frederick Tei-Maya; Ivy A Asante; Joe K. Mutungi; John K. Odoom; Joseph HK Bonney; Joyce M. Ngoi; Lawrence Ofori-Boadu; Lucas N. Amenga-Etego and Gordon A Awandare; Mildred Adusei-Poku; Nicaise T. Ndam; Peter K Quashie; Philip M Soglo; Samirah Saidi; Vincent Appiah; Violet McCormack; William K. Ampofo; Yaw Bediako                                                                                                                                                                                                                                                                                                                                                                                                                                                                                                                               |                                                                                                                                                                                                                                                                                                                                                                                                                                                                                                                                                                                                                                                                                                                                                                                                                                                                                                                                        |
| EPI_ISL_5539228                                                                                                                                                                                                                                                                                                                                                                                                                                                                                                                                                                                                                                                                                                                                                                                                                                                                                                                                                                                                                                                                                                                                                                                                                                                                                                                                                                                                                                                                                                                                                                                                                                                                                                                                                                                                                                                                                                             | West Metro Medical Center                                                                       | Philippine Genome Center                                                                        | Alethea R. de Guzman; Anna Ong-Lim; Arianne A. Zamora; Benedict A. Maralit; Carlo M. Lapid; Celia Carlos; Cynthia P. Saloma; Devon Ray Pacial; Diomedes A. Cariño; Edsel Maurice Salvana; El King D. Morado; Elcid Aaron R. Pangilinan; Eva Maria Cutongo-de la Paz; Francis A. Tablizo; Henrietta Marie Rodriguez; Jaime C. Montoya; Jan Michael C. Yap; Jarvin E. Nipales; Jo-Hannah S. Llames; John Q. Wong; Joshua Gregor A. Dizon; Juan Antonio R. Magalang; Karol Sophia Agape R. Padilla; Kenneth M. Kim; Kris P. Punayan; Kristina Patriz Dela Cruz; Lindsay Clare D.L. Carandang; Ma. Exanil Planting; Marc Edsel C. Ayes; Maria Rosario Singh-Vergeire; Maria Sofia L. Yangzon; Marielle M. Gamboa; Marissa Alejandria; Niña Francesca Bustamante; Razel Nikka M. Hao; Renato Jacinto Q. Mantaring; Rianna Patricia S. Cruz; Shiela Mae M. Araiza; Yvonne Valerie Austria; Zipporah Mariebelle R. Enriquez; Zyre V. Mollejon |                                                                                                                                                                                                                                                                                                                                                                                                                                                                                                                                                                                                                                                                                                                                                                                                                                                                                                                                        |
| EPI_ISL_4716539, EPI_ISL_4716578, EPI_ISL_4716584, EPI_ISL_4716755, EPI_ISL_4716759, EPI_ISL_4716788, EPI_ISL_4716830, EPI_ISL_4716910, EPI_ISL_4716918, EPI_ISL_4716976, EPI_ISL_4717068, EPI_ISL_4717080, EPI_ISL_4717125, EPI_ISL_4717172, EPI_ISL_4717240, EPI_ISL_4717251, EPI_ISL_4717271, EPI_ISL_4717347, EPI_ISL_5537722, EPI_ISL_5538168, EPI_ISL_5538574, EPI_ISL_5538774, EPI_ISL_5539040, EPI_ISL_5541070, EPI_ISL_5541289, EPI_ISL_5541311, EPI_ISL_5541360, EPI_ISL_5541375, EPI_ISL_5541452, EPI_ISL_5541453, EPI_ISL_5541460, EPI_ISL_5541470, EPI_ISL_5541487, EPI_ISL_5541488, EPI_ISL_5541493, EPI_ISL_5544028, EPI_ISL_5544035, EPI_ISL_5544038, EPI_ISL_5544101, EPI_ISL_5544116                                                                                                                                                                                                                                                                                                                                                                                                                                                                                                                                                                                                                                                                                                                                                                                                                                                                                                                                                                                                                                                                                                                                                                                                                      | see above                                                                                       | Western Visayas Medical Center (WVMC)                                                           | Philippine Genome Center                                                                                                                                                                                                                                                                                                                                                                                                                                                                                                                                                                                                                                                                                                                                                                                                                                                                                                               | Alethea R. de Guzman; Anna Ong-Lim; Arianne A. Zamora; Benedict A. Maralit; Carlo M. Lapid; Celia Carlos; Cynthia P. Saloma; Devon Ray Pacial; Diomedes A. Cariño; Edsel Maurice Salvana; El King D. Morado; Elcid Aaron R. Pangilinan; Eva Maria Cutongo-de la Paz; Francis A. Tablizo; Henrietta Marie Rodriguez; Jaime C. Montoya; Jan Michael C. Yap; Jarvin E. Nipales; Jo-Hannah S. Llames; John Q. Wong; Joshua Gregor A. Dizon; Juan Antonio R. Magalang; Karol Sophia Agape R. Padilla; Kenneth M. Kim; Kris P. Punayan; Kristina Patriz Dela Cruz; Lindsay Clare D.L. Carandang; Ma. Exanil Planting; Marc Edsel C. Ayes; Maria Rosario Singh-Vergeire; Maria Sofia L. Yangzon; Marielle M. Gamboa; Marissa Alejandria; Niña Francesca Bustamante; Razel Nikka M. Hao; Renato Jacinto Q. Mantaring; Rianna Patricia S. Cruz; Shiela Mae M. Araiza; Yvonne Valerie Austria; Zipporah Mariebelle R. Enriquez; Zyre V. Mollejon |
| EPI_ISL_5544070, EPI_ISL_5544107                                                                                                                                                                                                                                                                                                                                                                                                                                                                                                                                                                                                                                                                                                                                                                                                                                                                                                                                                                                                                                                                                                                                                                                                                                                                                                                                                                                                                                                                                                                                                                                                                                                                                                                                                                                                                                                                                            | Western Visayas State University - Molecular Diagnostic Laboratory                              | Philippine Genome Center                                                                        | Alethea R. de Guzman; Anna Ong-Lim; Arianne A. Zamora; Benedict A. Maralit; Carlo M. Lapid; Celia Carlos; Cynthia P. Saloma; Devon Ray Pacial; Diomedes A. Cariño; Edsel Maurice Salvana; El King D. Morado; Elcid Aaron R. Pangilinan; Eva Maria Cutongo-de la Paz; Francis A. Tablizo; Henrietta Marie Rodriguez; Jaime C. Montoya; Jan Michael C. Yap; Jarvin E. Nipales; Jo-Hannah S. Llames; John Q. Wong; Joshua Gregor A. Dizon; Juan Antonio R. Magalang; Karol Sophia Agape R. Padilla; Kenneth M. Kim; Kris P. Punayan; Kristina Patriz Dela Cruz; Lindsay Clare D.L. Carandang; Ma. Exanil Planting; Marc Edsel C. Ayes; Maria Rosario Singh-Vergeire; Maria Sofia L. Yangzon; Marielle M. Gamboa; Marissa Alejandria; Niña Francesca Bustamante; Razel Nikka M. Hao; Renato Jacinto Q. Mantaring; Rianna Patricia S. Cruz; Shiela Mae M. Araiza; Yvonne Valerie Austria; Zipporah Mariebelle R. Enriquez; Zyre V. Mollejon |                                                                                                                                                                                                                                                                                                                                                                                                                                                                                                                                                                                                                                                                                                                                                                                                                                                                                                                                        |
| EPI_ISL_2376280, EPI_ISL_2399523                                                                                                                                                                                                                                                                                                                                                                                                                                                                                                                                                                                                                                                                                                                                                                                                                                                                                                                                                                                                                                                                                                                                                                                                                                                                                                                                                                                                                                                                                                                                                                                                                                                                                                                                                                                                                                                                                            | Wexner Medical Center                                                                           | The Ohio State University College of Medicine                                                   | Koenig, S.; Semietnja, J.                                                                                                                                                                                                                                                                                                                                                                                                                                                                                                                                                                                                                                                                                                                                                                                                                                                                                                              |                                                                                                                                                                                                                                                                                                                                                                                                                                                                                                                                                                                                                                                                                                                                                                                                                                                                                                                                        |
| EPI_ISL_2558239, EPI_ISL_2558310, EPI_ISL_2558623                                                                                                                                                                                                                                                                                                                                                                                                                                                                                                                                                                                                                                                                                                                                                                                                                                                                                                                                                                                                                                                                                                                                                                                                                                                                                                                                                                                                                                                                                                                                                                                                                                                                                                                                                                                                                                                                           | Wisconsin State Laboratory of Hygiene Communicable Disease Division                             | Wisconsin State Laboratory of Hygiene Communicable Disease Division                             | Abigail C. Shockey; Alicia J. Mooney; Erika M. Hanson; Kelsey R. Florek; Richard Griesser; Sara Wagner; Tonya Danz                                                                                                                                                                                                                                                                                                                                                                                                                                                                                                                                                                                                                                                                                                                                                                                                                     |                                                                                                                                                                                                                                                                                                                                                                                                                                                                                                                                                                                                                                                                                                                                                                                                                                                                                                                                        |
| EPI_ISL_2382409                                                                                                                                                                                                                                                                                                                                                                                                                                                                                                                                                                                                                                                                                                                                                                                                                                                                                                                                                                                                                                                                                                                                                                                                                                                                                                                                                                                                                                                                                                                                                                                                                                                                                                                                                                                                                                                                                                             | Wisma Atlet                                                                                     | National Institute of Health Research and Development                                           | Arie Ardiansyah Nugraha; Hana Aparsi Pawestri; Hartanti Dian Ikawati; Kartika Dewi Puspa; Krisna Pangesti; Nelly Puspandari; Subangkit; Triyani Soekarso; Vivi Setiawaty                                                                                                                                                                                                                                                                                                                                                                                                                                                                                                                                                                                                                                                                                                                                                               |                                                                                                                                                                                                                                                                                                                                                                                                                                                                                                                                                                                                                                                                                                                                                                                                                                                                                                                                        |
| EPI_ISL_3722678                                                                                                                                                                                                                                                                                                                                                                                                                                                                                                                                                                                                                                                                                                                                                                                                                                                                                                                                                                                                                                                                                                                                                                                                                                                                                                                                                                                                                                                                                                                                                                                                                                                                                                                                                                                                                                                                                                             | WolfTRACS Surveillance Lab                                                                      | Harris/Rasmussen Lab                                                                            | Angela Harris; David Rasmussen; Gina Chaput; Megan Jacob; Temi Iboyte                                                                                                                                                                                                                                                                                                                                                                                                                                                                                                                                                                                                                                                                                                                                                                                                                                                                  |                                                                                                                                                                                                                                                                                                                                                                                                                                                                                                                                                                                                                                                                                                                                                                                                                                                                                                                                        |
| EPI_ISL_2375925, EPI_ISL_2375931, EPI_ISL_5195387, EPI_ISL_5524623                                                                                                                                                                                                                                                                                                                                                                                                                                                                                                                                                                                                                                                                                                                                                                                                                                                                                                                                                                                                                                                                                                                                                                                                                                                                                                                                                                                                                                                                                                                                                                                                                                                                                                                                                                                                                                                          | Worcester Hospital wc WOC                                                                       | NHLS/UCT                                                                                        | Arash Iranzadeh; Bruna Galvao; Carolyn Williamson; Deelan Doolabh; Diana Hardie; Gert Marais; Innocent Mudau; Kruger Marais; Lynn Tyers; Marvin Hsiao; Rageema Joseph; Stephen Korsman                                                                                                                                                                                                                                                                                                                                                                                                                                                                                                                                                                                                                                                                                                                                                 |                                                                                                                                                                                                                                                                                                                                                                                                                                                                                                                                                                                                                                                                                                                                                                                                                                                                                                                                        |
| EPI_ISL_2501719                                                                                                                                                                                                                                                                                                                                                                                                                                                                                                                                                                                                                                                                                                                                                                                                                                                                                                                                                                                                                                                                                                                                                                                                                                                                                                                                                                                                                                                                                                                                                                                                                                                                                                                                                                                                                                                                                                             | Yale Clinical Virology Lab                                                                      | Grubaugh Lab - Yale School of Public                                                            | Anderson Brito; Annie Watkins; Chaney Kalinich; Chantal Vogels; Isabel Ott; Jessica Rothman; Joseph Fauver; Mallery Breban; Marie L. Landry; Mary Petrone; Nathan Grubaugh; Tara Alpert                                                                                                                                                                                                                                                                                                                                                                                                                                                                                                                                                                                                                                                                                                                                                |                                                                                                                                                                                                                                                                                                                                                                                                                                                                                                                                                                                                                                                                                                                                                                                                                                                                                                                                        |

| Health                                                                                                                                                                                                                                                                                                                                                                                                                                                                                                                                                                                                                                                                                                                                                                                                                                                                                                                                                                                                                                                                                                                                                                                                                                                                                                                                     |                                                                   |                                                                                                          |                                                                                                                                                                                                                                                                                                                                                                                                                                                                                                                                                                                                                                                                                                                                                                                                                                                                                                                                                                                                                                                                                                                                                                                                                  |
|--------------------------------------------------------------------------------------------------------------------------------------------------------------------------------------------------------------------------------------------------------------------------------------------------------------------------------------------------------------------------------------------------------------------------------------------------------------------------------------------------------------------------------------------------------------------------------------------------------------------------------------------------------------------------------------------------------------------------------------------------------------------------------------------------------------------------------------------------------------------------------------------------------------------------------------------------------------------------------------------------------------------------------------------------------------------------------------------------------------------------------------------------------------------------------------------------------------------------------------------------------------------------------------------------------------------------------------------|-------------------------------------------------------------------|----------------------------------------------------------------------------------------------------------|------------------------------------------------------------------------------------------------------------------------------------------------------------------------------------------------------------------------------------------------------------------------------------------------------------------------------------------------------------------------------------------------------------------------------------------------------------------------------------------------------------------------------------------------------------------------------------------------------------------------------------------------------------------------------------------------------------------------------------------------------------------------------------------------------------------------------------------------------------------------------------------------------------------------------------------------------------------------------------------------------------------------------------------------------------------------------------------------------------------------------------------------------------------------------------------------------------------|
| EPI_ISL_5543303                                                                                                                                                                                                                                                                                                                                                                                                                                                                                                                                                                                                                                                                                                                                                                                                                                                                                                                                                                                                                                                                                                                                                                                                                                                                                                                            | ZAMBOANGA CITY MEDICAL CENTER<br>GENEXPERT LABORATORY             | Philippine Genome Center                                                                                 | Alethea R. de Guzman; Anna Ong-Lim; Arianne A. Zamora; Benedict A. Maralit; Carlo M. Lapid; Celia Carlos; Cynthia P. Saloma; Devon Ray Pacial; Diomedes A. Cariño; Edsel Maurice Salvana; El King D. Morado; Elcid Aaron R. Pangilinan; Eva Maria Cutiongco-de la Paz; Francis A. Tablizo; Henrietta Marie Rodriguez; Jaime C. Montoya; Jan Michael C. Yap; Jarvin E. Nipales; Jo-Hannah S. Llamas; John Q. Wong; Joshua Gregor A. Dizon; Juan Antonio R. Magalang; Karol Sophia Agape R. Padilla; Kenneth M. Kim; Kris P. Punayan; Kristina Patriz Dela Cruz; Lindsay Claire D.L. Carandang; Ma. Exanil Plantig; Marc Edsel C. Ayes; Maria Rosario Singh-Vergeire; Maria Sofia L. Yangzon; Marielle M. Gamboa; Marissa Alejandria; Niña Francesca Bustamante; Razel Nikka M. Hao; Renato Jacinto Q. Mantaring; Rianna Patricia S. Cruz; Shiela Mae M. Araiza; Yvonne Valerie Austria; Zipporah Mariebelle R. Enriquez; Zyrel V. Mollejon                                                                                                                                                                                                                                                                        |
| EPI_ISL_2727270,<br>EPI_ISL_2727272,<br>EPI_ISL_2727288,<br>EPI_ISL_2727289                                                                                                                                                                                                                                                                                                                                                                                                                                                                                                                                                                                                                                                                                                                                                                                                                                                                                                                                                                                                                                                                                                                                                                                                                                                                | ZARV/NHLS, Department Medical<br>Virology, University of Pretoria | KRISP, KZN Research Innovation and<br>Sequencing Platform                                                | Adriano Mendes; Amy Strydom; Emmanuel Sj; Giandhari J.; Lessells R; Micheala Davids; Naidoo Y; Pillay S; Ramphal U; Sim Mayaphi and Marietjie Venter; Tegally H; Wilkinson E; de Oliveira T                                                                                                                                                                                                                                                                                                                                                                                                                                                                                                                                                                                                                                                                                                                                                                                                                                                                                                                                                                                                                      |
| EPI_ISL_2727331, EPI_ISL_2727333, EPI_ISL_2727336, EPI_ISL_2727337, EPI_ISL_2727339, EPI_ISL_2727340, EPI_ISL_2727341, EPI_ISL_2727342, EPI_ISL_2727344, EPI_ISL_2727346, EPI_ISL_2727348, EPI_ISL_2727350, EPI_ISL_2727368, EPI_ISL_2727372, EPI_ISL_2955426                                                                                                                                                                                                                                                                                                                                                                                                                                                                                                                                                                                                                                                                                                                                                                                                                                                                                                                                                                                                                                                                              | see above                                                         | ZARV/NHLS, Department Medical<br>Virology, University of Pretoria                                        | Adriano Mendes; Amy Strydom; Emmanuel Sj; Giandhari J.; Lessells R; Micheala Davids; Naidoo Y; Pillay S; Ramphal U; Sim Mayaphi and Marietjie Venter; Tegally H; Wilkinson E; de Oliveira T                                                                                                                                                                                                                                                                                                                                                                                                                                                                                                                                                                                                                                                                                                                                                                                                                                                                                                                                                                                                                      |
| EPI_ISL_2462988                                                                                                                                                                                                                                                                                                                                                                                                                                                                                                                                                                                                                                                                                                                                                                                                                                                                                                                                                                                                                                                                                                                                                                                                                                                                                                                            | ZOL                                                               | Jessa                                                                                                    | Berden et al. on behalf of the Jessa_cmdLab                                                                                                                                                                                                                                                                                                                                                                                                                                                                                                                                                                                                                                                                                                                                                                                                                                                                                                                                                                                                                                                                                                                                                                      |
| EPI_ISL_2859305, EPI_ISL_2859317, EPI_ISL_2859324, EPI_ISL_2859330, EPI_ISL_2859334, EPI_ISL_2859349, EPI_ISL_2859352, EPI_ISL_2859356, EPI_ISL_2859359, EPI_ISL_2859367                                                                                                                                                                                                                                                                                                                                                                                                                                                                                                                                                                                                                                                                                                                                                                                                                                                                                                                                                                                                                                                                                                                                                                   | see above                                                         | Zamboanga City Medical Center                                                                            | Philippine Genome Center<br>Alethea R. de Guzman; Anna Ong-Lim; Arianne A. Zamora; Benedict A. Maralit; Carlo M. Lapid; Celia Carlos; Devon Ray Pacial; Diomedes A. Carino; Edsel Maurice Salvaña; El King D. Morado; Elcid Aaron R. Pangilinan; Eva Maria Cutiongco-de la Paz; Francis A. Tablizo; Henrietta Marie Rodriguez; Jaime C. Montoya; Jan Michael C. Yap; Jarvin E. Nipales; Jo-Hannah S. Llamas; John Q. Wong; Joshua Gregor A. Dizon; Juan Antonio R. Magalang; Karol Sophia Agape R. Padilla; Kenneth M. Kim; Kris P. Punayan; Kristina Patriz Dela Cruz; Lindsay Claire D.L. Carandang; Ma. Exanil Plantig; Marc Edsel C. Ayes; Maria Rosario Singh-Vergeire and Cynthia P. Saloma; Maria Sofia L. Yangzon; Marielle M Gamboa; Marielle M. Gamboa; Marissa Alejandria; Niña Francesca Bustamante; Razel Nikka M. Hao; Renato Jacinto Q. Mantaring; Rianna Patricia S. Cruz; Sheila Mae M. Araiza; Yvonne Valerie Austria; Zipporah Mariebelle R. Enriquez; Zyrel V. Mollejon                                                                                                                                                                                                                      |
| EPI_ISL_2859301, EPI_ISL_2859306, EPI_ISL_2859327, EPI_ISL_2859341, EPI_ISL_2859348, EPI_ISL_2859358, EPI_ISL_2859366, EPI_ISL_2859368, EPI_ISL_2859371, EPI_ISL_4712104, EPI_ISL_4712141, EPI_ISL_4712146, EPI_ISL_4712178, EPI_ISL_4712199, EPI_ISL_4714737, EPI_ISL_4714787, EPI_ISL_4714846, EPI_ISL_4714932, EPI_ISL_4715033, EPI_ISL_4715228, EPI_ISL_4717145, EPI_ISL_5537873, EPI_ISL_5538224, EPI_ISL_5538420, EPI_ISL_5539048, EPI_ISL_5547729, EPI_ISL_5552642                                                                                                                                                                                                                                                                                                                                                                                                                                                                                                                                                                                                                                                                                                                                                                                                                                                                  | see above                                                         | Zamboanga City Medical Center<br>GeneXpert Laboratory                                                    | Philippine Genome Center<br>Alethea R. de Guzman; Alyssa Joyce E. Telles; Anna Ong-Lim; Arianne A. Zamora; Benedict A. Maralit; Carlo M. Lapid; Celia Carlos; Cynthia P. Saloma; Devon Ray Pacial; Diomedes A. Carino; Diomedes A. Cariño; Edsel Maurice Salvana; Edsel Maurice Salvaña; El King D. Morado; Elcid Aaron R. Pangilinan; Eva Maria Cutiongco-de la Paz; Francis A. Tablizo; Henrietta Marie Rodriguez; Jaime C. Montoya; Jan Michael C. Yap; Jarvin E. Nipales; Jo-Hannah S. Llamas; John Michael Egana; John Q. Wong; Joshua Gregor A. Dizon; Joshua Jose Endozo; Juan Antonio R. Magalang; Karol Sophia Agape R. Padilla; Kenneth M. Kim; Kris P. Punayan; Kristina Patriz Dela Cruz; Kristina Patriz Dela Cruz; Lindsay Claire D.L. Carandang; Lindsay Clare D.L. Carandang; Ma. Exanil Plantig; Marc Edsel C. Ayes; Maria Rosario Singh-Vergeire; Maria Rosario Singh-Vergeire and Cynthia P. Saloma; Maria Sofia L. Yangzon; Marielle M Gamboa; Marielle M. Gamboa; Marissa Alejandria; Niña Francesca Bustamante; Razel Nikka M. Hao; Renato Jacinto Q. Mantaring; Rianna Patricia S. Cruz; Sheila Mae M. Araiza; Yvonne Valerie Austria; Zipporah Mariebelle R. Enriquez; Zyrel V. Mollejon |
| EPI_ISL_2859304, EPI_ISL_2859309, EPI_ISL_2859344, EPI_ISL_2859345, EPI_ISL_4713630, EPI_ISL_4714947, EPI_ISL_4715198, EPI_ISL_4716498, EPI_ISL_4716570, EPI_ISL_4716593, EPI_ISL_4716633, EPI_ISL_4716685, EPI_ISL_4716797, EPI_ISL_4716812, EPI_ISL_4716869, EPI_ISL_4716870, EPI_ISL_4716882, EPI_ISL_4716899, EPI_ISL_4716938, EPI_ISL_4716947, EPI_ISL_4716959, EPI_ISL_4716987, EPI_ISL_4716997, EPI_ISL_4717007, EPI_ISL_4717026, EPI_ISL_4717032, EPI_ISL_4717038, EPI_ISL_4717087, EPI_ISL_4717096, EPI_ISL_4717112, EPI_ISL_4717179, EPI_ISL_4717200, EPI_ISL_4717293, EPI_ISL_4717307, EPI_ISL_4717314, EPI_ISL_4717329, EPI_ISL_4717351, EPI_ISL_4717352, EPI_ISL_4717379, EPI_ISL_4717383, EPI_ISL_4714443, EPI_ISL_4741496, EPI_ISL_4741499, EPI_ISL_4741512, EPI_ISL_4741529, EPI_ISL_4741535, EPI_ISL_4741556, EPI_ISL_4741589, EPI_ISL_5537774, EPI_ISL_5538338, EPI_ISL_5538620, EPI_ISL_5538724, EPI_ISL_5538735, EPI_ISL_5539116, EPI_ISL_5540353, EPI_ISL_5540464, EPI_ISL_5540520, EPI_ISL_5541108, EPI_ISL_5547434, EPI_ISL_5547673, EPI_ISL_5562193, EPI_ISL_5562264, EPI_ISL_5562312, EPI_ISL_5562347, EPI_ISL_5562437, EPI_ISL_5562522, EPI_ISL_5562570, EPI_ISL_5562625, EPI_ISL_5562837, EPI_ISL_5562843, EPI_ISL_5562970, EPI_ISL_5562978, EPI_ISL_5563116, EPI_ISL_5563284, EPI_ISL_5563572, EPI_ISL_5563826 | see above                                                         | Zamboanga City Medical Center-<br>Department of Agriculture Satellite<br>Laboratory for COVID-19 Testing |                                                                                                                                                                                                                                                                                                                                                                                                                                                                                                                                                                                                                                                                                                                                                                                                                                                                                                                                                                                                                                                                                                                                                                                                                  |
| EPI_ISL_5587724, EPI_ISL_5587725, EPI_ISL_5587726, EPI_ISL_5587727, EPI_ISL_5587728, EPI_ISL_5587738, EPI_ISL_5587802, EPI_ISL_5587803, EPI_ISL_5587822, EPI_ISL_5587858, EPI_ISL_5587862                                                                                                                                                                                                                                                                                                                                                                                                                                                                                                                                                                                                                                                                                                                                                                                                                                                                                                                                                                                                                                                                                                                                                  | see above                                                         | Zamboanga Del Norte Medical Center<br>Molecular Laboratory                                               | Philippine Genome Center<br>Alethea R. de Guzman; Alyssa Joyce E. Telles; Anna Ong-Lim; Arianne A. Zamora; Benedict A. Maralit; Carlo M. Lapid; Celia Carlos; Cynthia P. Saloma; Devon Ray Pacial; Diomedes A. Cariño; Edsel Maurice Salvana; El King D. Morado; Elcid Aaron R. Pangilinan; Eva Maria Cutiongco-de la Paz; Francis A. Tablizo; Henrietta Marie Rodriguez; Jaime C. Montoya; Jan Michael C. Yap; Jarvin E. Nipales; Jo-Hannah S. Llamas; John Michael Egana; John Q. Wong; Joshua Gregor A. Dizon; Joshua Jose Endozo; Juan Antonio R. Magalang; Karol Sophia Agape R. Padilla; Kenneth M. Kim; Kris P. Punayan; Kristina Patriz Dela Cruz; Lindsay Claire D.L. Carandang; Ma. Exanil Plantig; Marc Edsel C. Ayes; Maria Rosario Singh-Vergeire; Maria Sofia L. Yangzon; Marielle M. Gamboa; Marissa Alejandria; Niña Francesca Bustamante; Razel Nikka M. Hao; Renato Jacinto Q. Mantaring; Rianna Patricia S. Cruz; Sheila Mae M. Araiza; Yvonne Valerie Austria; Zipporah Mariebelle R. Enriquez; Zyrel V. Mollejon                                                                                                                                                                            |
| EPI_ISL_4714951, EPI_ISL_4741445, EPI_ISL_4741461, EPI_ISL_4741531, EPI_ISL_4741543, EPI_ISL_4741552, EPI_ISL_4741560, EPI_ISL_4741563, EPI_ISL_5547396, EPI_ISL_5547503, EPI_ISL_5558814, EPI_ISL_5562216                                                                                                                                                                                                                                                                                                                                                                                                                                                                                                                                                                                                                                                                                                                                                                                                                                                                                                                                                                                                                                                                                                                                 | see above                                                         | Zamboanga Del Sur Medical Center<br>PCR Laboratory                                                       | Philippine Genome Center<br>Alethea R. de Guzman; Alyssa Joyce E. Telles; Anna Ong-Lim; Arianne A. Zamora; Benedict A. Maralit; Carlo M. Lapid; Celia Carlos; Cynthia P. Saloma; Devon Ray Pacial; Diomedes A. Cariño; Edsel Maurice Salvana; El King D. Morado; Elcid Aaron R. Pangilinan; Eva Maria Cutiongco-de la Paz; Francis A. Tablizo; Henrietta Marie Rodriguez; Jaime C. Montoya; Jan Michael C. Yap; Jarvin E. Nipales; Jo-Hannah S. Llamas; John Michael Egana; John Q. Wong; Joshua Gregor A. Dizon; Joshua Jose Endozo; Juan Antonio R. Magalang; Karol Sophia Agape R. Padilla; Kenneth M. Kim; Kris P. Punayan; Kristina Patriz Dela Cruz; Lindsay Claire D.L. Carandang; Ma. Exanil Plantig; Marc Edsel C. Ayes; Maria Rosario Singh-Vergeire; Maria Sofia L. Yangzon; Marielle M. Gamboa; Marissa Alejandria; Niña Francesca Bustamante; Razel Nikka M. Hao; Renato Jacinto Q. Mantaring; Rianna Patricia S. Cruz; Shiela Mae M. Araiza; Yvonne Valerie Austria; Zipporah Mariebelle R. Enriquez; Zyrel V. Mollejon                                                                                                                                                                            |
| EPI_ISL_4227754                                                                                                                                                                                                                                                                                                                                                                                                                                                                                                                                                                                                                                                                                                                                                                                                                                                                                                                                                                                                                                                                                                                                                                                                                                                                                                                            | amedes MVZ für<br>Laboratoriumsdiagnostik Erfurt                  | Robert Koch Institute                                                                                    |                                                                                                                                                                                                                                                                                                                                                                                                                                                                                                                                                                                                                                                                                                                                                                                                                                                                                                                                                                                                                                                                                                                                                                                                                  |
| EPI_ISL_2635612                                                                                                                                                                                                                                                                                                                                                                                                                                                                                                                                                                                                                                                                                                                                                                                                                                                                                                                                                                                                                                                                                                                                                                                                                                                                                                                            | amedes MVZ für Labordiagnostik<br>Rhein-Main                      | Robert Koch Institute                                                                                    |                                                                                                                                                                                                                                                                                                                                                                                                                                                                                                                                                                                                                                                                                                                                                                                                                                                                                                                                                                                                                                                                                                                                                                                                                  |
| EPI_ISL_2421127, EPI_ISL_2421131, EPI_ISL_2425572, EPI_ISL_2425578, EPI_ISL_2425587, EPI_ISL_2425594, EPI_ISL_2425606, EPI_ISL_2425611, EPI_ISL_2562018, EPI_ISL_2562042, EPI_ISL_2562044, EPI_ISL_2613692, EPI_ISL_2613698, EPI_ISL_2622033                                                                                                                                                                                                                                                                                                                                                                                                                                                                                                                                                                                                                                                                                                                                                                                                                                                                                                                                                                                                                                                                                               | see above                                                         | cerballiance-IDF                                                                                         | Cerba lab<br>Aude Lessenne; Bénédicte Roquebert; Emmanuel Lecorche; Kader Merah; Laura Verdurme; Patrice Herisson; Sabine Trombert-Paolantoni; Stéphanie Haim-Boukobza; Thierry Collin                                                                                                                                                                                                                                                                                                                                                                                                                                                                                                                                                                                                                                                                                                                                                                                                                                                                                                                                                                                                                           |
| EPI_ISL_2622044                                                                                                                                                                                                                                                                                                                                                                                                                                                                                                                                                                                                                                                                                                                                                                                                                                                                                                                                                                                                                                                                                                                                                                                                                                                                                                                            | cerballiance-Oise                                                 | Cerba lab                                                                                                | Aude Lessenne; Bénédicte Roquebert; Emmanuel Lecorche; Kader Merah; Laura Verdurme; Patrice Herisson; Sabine Trombert-Paolantoni; Stéphanie Haim-Boukobza; Thierry Collin                                                                                                                                                                                                                                                                                                                                                                                                                                                                                                                                                                                                                                                                                                                                                                                                                                                                                                                                                                                                                                        |
| EPI_ISL_2561984,<br>EPI_ISL_2561985,<br>EPI_ISL_2562004                                                                                                                                                                                                                                                                                                                                                                                                                                                                                                                                                                                                                                                                                                                                                                                                                                                                                                                                                                                                                                                                                                                                                                                                                                                                                    | cerballiance-cote d'azur                                          | Cerba lab                                                                                                | Bénédicte Roquebert; Emmanuel Lecorche; Laura Verdurme; Sabine Trombert-Paolantoni; Stéphanie Haim-Boukobza                                                                                                                                                                                                                                                                                                                                                                                                                                                                                                                                                                                                                                                                                                                                                                                                                                                                                                                                                                                                                                                                                                      |
| EPI_ISL_3620534                                                                                                                                                                                                                                                                                                                                                                                                                                                                                                                                                                                                                                                                                                                                                                                                                                                                                                                                                                                                                                                                                                                                                                                                                                                                                                                            | icddr,b                                                           | Institute for Developing Science and<br>Health Initiatives (ideSHI)                                      | Firdausi Qadri; Hassan Afrad; Omar Hamza; Sadia Rahman                                                                                                                                                                                                                                                                                                                                                                                                                                                                                                                                                                                                                                                                                                                                                                                                                                                                                                                                                                                                                                                                                                                                                           |
| EPI_ISL_2958758                                                                                                                                                                                                                                                                                                                                                                                                                                                                                                                                                                                                                                                                                                                                                                                                                                                                                                                                                                                                                                                                                                                                                                                                                                                                                                                            | labo Analyses Med                                                 | National Reference Center for Viruses of<br>Respiratory Infections, Institut Pasteur,<br>Paris           | Angela Brisebarre; Camille Capel; Christophe Malabat; Corinne Maufrais; Etienne Simon-Lorière; Frédéric Lemoine; Hub Bioinformatique Biostatistiques; LEONARD Pierre-Yves; Louise Lefrançois; Marion Barbet; Maud Vanpeene; Méline Bizard; Sylvie Behillili; Sylvie Van der Werf; Vincent Enouf                                                                                                                                                                                                                                                                                                                                                                                                                                                                                                                                                                                                                                                                                                                                                                                                                                                                                                                  |
| EPI_ISL_2637437, EPI_ISL_2637466, EPI_ISL_2637473, EPI_ISL_2637476, EPI_ISL_2637481, EPI_ISL_2637524, EPI_ISL_2637638, EPI_ISL_2637668, EPI_ISL_2637683, EPI_ISL_2637926, EPI_ISL_2795768, EPI_ISL_3393448                                                                                                                                                                                                                                                                                                                                                                                                                                                                                                                                                                                                                                                                                                                                                                                                                                                                                                                                                                                                                                                                                                                                 | see above                                                         | laboratoire Belle Epine                                                                                  | Alexandre Soulier; Christophe Rodriguez; Elisabeth Trawinski; Guillaume Gricourt; Jean-Michel Pawlotsky; Melissa N'Debi; Slim Fourati; Vanessa Demontant                                                                                                                                                                                                                                                                                                                                                                                                                                                                                                                                                                                                                                                                                                                                                                                                                                                                                                                                                                                                                                                         |
| EPI_ISL_4291724, EPI_ISL_4291836, EPI_ISL_4291882, EPI_ISL_4291891, EPI_ISL_4291917, EPI_ISL_4291973, EPI_ISL_4292090, EPI_ISL_4292159, EPI_ISL_4292193, EPI_ISL_4292237, EPI_ISL_4292273, EPI_ISL_4292335, EPI_ISL_4292338, EPI_ISL_4292365, EPI_ISL_4292371, EPI_ISL_4293386, EPI_ISL_4293409, EPI_ISL_4293463, EPI_ISL_4293468, EPI_ISL_4293485, EPI_ISL_4293494, EPI_ISL_4293496, EPI_ISL_4293507, EPI_ISL_4293516, EPI_ISL_4293518, EPI_ISL_4293520, EPI_ISL_4293520, EPI_ISL_4293535, EPI_ISL_4293544, EPI_ISL_4293561, EPI_ISL_4293611, EPI_ISL_4293636, EPI_ISL_4293712, EPI_ISL_4293741, EPI_ISL_4293742, EPI_ISL_4293743, EPI_ISL_4293795, EPI_ISL_4293813, EPI_ISL_4293815, EPI_ISL_4293822, EPI_ISL_4293831, EPI_ISL_4294026, EPI_ISL_4294032, EPI_ISL_4294049, EPI_ISL_4294057, EPI_ISL_4294099, EPI_ISL_4294115, EPI_ISL_4294124, EPI_ISL_4295781, EPI_ISL_4295810, EPI_ISL_4295839, EPI_ISL_4295852, EPI_ISL_4295856, EPI_ISL_4295858, EPI_ISL_4295865                                                                                                                                                                                                                                                                                                                                                                      | see above                                                         | unknown                                                                                                  | CNR Virus des Infections Respiratoires -<br>France SUD<br>Antonin Bal; Bruno Lina; Gregory Destras; Gwendolyne Burfin; Hadrien Regue; Laurence Josset; Martine Valette; Quentin Semanas                                                                                                                                                                                                                                                                                                                                                                                                                                                                                                                                                                                                                                                                                                                                                                                                                                                                                                                                                                                                                          |
| EPI_ISL_5863465                                                                                                                                                                                                                                                                                                                                                                                                                                                                                                                                                                                                                                                                                                                                                                                                                                                                                                                                                                                                                                                                                                                                                                                                                                                                                                                            | unknown                                                           | Noblis                                                                                                   | Katharine Jennings; Lauren Brinkac; Lee F. Kolakowski; Minh Tran; Shane Mitchell; Shiela Diepold; William M. Nelson                                                                                                                                                                                                                                                                                                                                                                                                                                                                                                                                                                                                                                                                                                                                                                                                                                                                                                                                                                                                                                                                                              |

We gratefully acknowledge the following Authors from the Originating laboratories responsible for obtaining the specimens, as well as the Submitting laboratories where the genome data were generated and shared via GISAID, on which this research is based.

All Submitters of data may be contacted directly via [www.gisaid.org](http://www.gisaid.org)

Authors are sorted alphabetically.

| Accession ID                                                                                                                                                                                                                                                                                                                                                                                                                                                                                                                                                                                                                                                                                                                                                                                                                                                    | Originating Laboratory                                          | Submitting Laboratory                                                               | Authors                                                                                                                                                                                      |                                                                                            |
|-----------------------------------------------------------------------------------------------------------------------------------------------------------------------------------------------------------------------------------------------------------------------------------------------------------------------------------------------------------------------------------------------------------------------------------------------------------------------------------------------------------------------------------------------------------------------------------------------------------------------------------------------------------------------------------------------------------------------------------------------------------------------------------------------------------------------------------------------------------------|-----------------------------------------------------------------|-------------------------------------------------------------------------------------|----------------------------------------------------------------------------------------------------------------------------------------------------------------------------------------------|--------------------------------------------------------------------------------------------|
| EPI_ISL_6585702, EPI_ISL_6585703, EPI_ISL_6585704, EPI_ISL_6585705, EPI_ISL_6585707, EPI_ISL_6585709, EPI_ISL_6585710, EPI_ISL_6585712, EPI_ISL_6585714, EPI_ISL_6585715, EPI_ISL_6585716, EPI_ISL_6585717, EPI_ISL_6585945, EPI_ISL_6585946, EPI_ISL_6585947, EPI_ISL_6585950, EPI_ISL_6585951, EPI_ISL_6585952, EPI_ISL_6585953, EPI_ISL_6585954, EPI_ISL_6585956, EPI_ISL_6585957, EPI_ISL_6585958, EPI_ISL_6585960, EPI_ISL_6585967, EPI_ISL_6585972, EPI_ISL_6585973, EPI_ISL_6585980, EPI_ISL_6585981, EPI_ISL_6585982, EPI_ISL_6585983, EPI_ISL_6585985, EPI_ISL_6585987, EPI_ISL_6586067                                                                                                                                                                                                                                                                | see above                                                       | 4Cyte Pathology                                                                     | NSW Health Pathology - Institute of Clinical Pathology and Medical Research; Westmead Hospital; University of Sydney                                                                         |                                                                                            |
|                                                                                                                                                                                                                                                                                                                                                                                                                                                                                                                                                                                                                                                                                                                                                                                                                                                                 |                                                                 |                                                                                     | Arnott A.; Draper J.; Gall M.; Martinez E.; Rockett R.; Sintchenko V.; on behalf of ICPMR                                                                                                    |                                                                                            |
| EPI_ISL_6588110, EPI_ISL_6588111, EPI_ISL_6588112, EPI_ISL_6588113, EPI_ISL_6588115, EPI_ISL_6588116, EPI_ISL_6588117, EPI_ISL_6588119, EPI_ISL_6588120, EPI_ISL_6588121, EPI_ISL_6588122, EPI_ISL_6588123, EPI_ISL_6588124, EPI_ISL_6588125, EPI_ISL_6588126, EPI_ISL_6588127, EPI_ISL_6588128, EPI_ISL_6588129, EPI_ISL_6588130, EPI_ISL_6588131, EPI_ISL_6588132, EPI_ISL_6588133, EPI_ISL_6588134, EPI_ISL_6588135, EPI_ISL_6588136, EPI_ISL_6588138, EPI_ISL_6588139, EPI_ISL_6588140, EPI_ISL_6588141, EPI_ISL_6588142, EPI_ISL_6588143, EPI_ISL_6588144, EPI_ISL_6588145, EPI_ISL_6588146, EPI_ISL_6588147, EPI_ISL_6588148, EPI_ISL_6588153, EPI_ISL_6588154, EPI_ISL_6588155, EPI_ISL_6588156, EPI_ISL_6588157                                                                                                                                         | see above                                                       | ABC Algarve                                                                         | Instituto Nacional de Saude (INSA)                                                                                                                                                           | Borges et al                                                                               |
| EPI_ISL_6591488                                                                                                                                                                                                                                                                                                                                                                                                                                                                                                                                                                                                                                                                                                                                                                                                                                                 | AREA DE SALUD ABANGARES                                         | Incienza, Instituto Costarricense de Investigación y Enseñanza en Nutrición y Salud | Adriana Godínez; Claudio Soto-Garita; Estela Cordero; Francisco Duarte; Hebleen Porras; José Luis Vargas; Mariela Gutiérrez; Melany Calderón; Sofia Herrera & Arnoldo Zamora                 |                                                                                            |
| EPI_ISL_6591781                                                                                                                                                                                                                                                                                                                                                                                                                                                                                                                                                                                                                                                                                                                                                                                                                                                 | AREA DE SALUD ACOSTA                                            | Incienza, Instituto Costarricense de Investigación y Enseñanza en Nutrición y Salud | Adriana Godínez; Claudio Soto-Garita; Estela Cordero; Francisco Duarte; Hebleen Porras; José Luis Vargas; Mariela Gutiérrez & Sofia Herrera; Melany Calderón                                 |                                                                                            |
| EPI_ISL_6591454                                                                                                                                                                                                                                                                                                                                                                                                                                                                                                                                                                                                                                                                                                                                                                                                                                                 | AREA DE SALUD BAGACES                                           | Incienza, Instituto Costarricense de Investigación y Enseñanza en Nutrición y Salud | Adriana Godínez; Claudio Soto-Garita; Estela Cordero; Francisco Duarte; Hebleen Porras; José Luis Vargas; Mariela Gutiérrez; Melany Calderón; Sofia Herrera & Helga Fonseca Mendoza          |                                                                                            |
| EPI_ISL_6591729                                                                                                                                                                                                                                                                                                                                                                                                                                                                                                                                                                                                                                                                                                                                                                                                                                                 | AREA DE SALUD BARRANCA - CLINICA DR. ROBERTO SOTO               | Incienza, Instituto Costarricense de Investigación y Enseñanza en Nutrición y Salud | Adriana Godínez; Claudio Soto-Garita; Estela Cordero; Francisco Duarte; Hebleen Porras; José Luis Vargas; Mariela Gutiérrez; Melany Calderón; Sofia Herrera & Sergio Mejia Iglesias          |                                                                                            |
| EPI_ISL_6591541                                                                                                                                                                                                                                                                                                                                                                                                                                                                                                                                                                                                                                                                                                                                                                                                                                                 | AREA DE SALUD BARVA (COOPESIBA)                                 | Incienza, Instituto Costarricense de Investigación y Enseñanza en Nutrición y Salud | Adriana Godínez; Claudio Soto-Garita; Estela Cordero; Francisco Duarte; Hebleen Porras; José Luis Vargas; Mariela Gutiérrez; Melany Calderón; Sofia Herrera & Angélica Espinoza Fontana      |                                                                                            |
| EPI_ISL_6591557                                                                                                                                                                                                                                                                                                                                                                                                                                                                                                                                                                                                                                                                                                                                                                                                                                                 | AREA DE SALUD BELEN-FLORES - CLINICA DR. JORGE VOLIO            | Incienza, Instituto Costarricense de Investigación y Enseñanza en Nutrición y Salud | Adriana Godínez; Claudio Soto-Garita; Estela Cordero; Francisco Duarte; Hebleen Porras; José Luis Vargas; Mariela Gutiérrez & Sofia Herrera; Melany Calderón                                 |                                                                                            |
| EPI_ISL_6591595                                                                                                                                                                                                                                                                                                                                                                                                                                                                                                                                                                                                                                                                                                                                                                                                                                                 | AREA DE SALUD CARIARI                                           | Incienza, Instituto Costarricense de Investigación y Enseñanza en Nutrición y Salud | Adriana Godínez; Claudio Soto-Garita; Estela Cordero; Francisco Duarte; Hebleen Porras; José Luis Vargas; Mariela Gutiérrez; Melany Calderón; Sofia Herrera & Dra. Leticia Gallegos Carrillo |                                                                                            |
| EPI_ISL_6591470                                                                                                                                                                                                                                                                                                                                                                                                                                                                                                                                                                                                                                                                                                                                                                                                                                                 | AREA DE SALUD CAÑAS                                             | Incienza, Instituto Costarricense de Investigación y Enseñanza en Nutrición y Salud | Adriana Godínez; Claudio Soto-Garita; Estela Cordero; Francisco Duarte; Hebleen Porras; José Luis Vargas; Mariela Gutiérrez; Melany Calderón; Sofia Herrera & Arnoldo Zamora                 |                                                                                            |
| EPI_ISL_6591705                                                                                                                                                                                                                                                                                                                                                                                                                                                                                                                                                                                                                                                                                                                                                                                                                                                 | AREA DE SALUD CORREDORES                                        | Incienza, Instituto Costarricense de Investigación y Enseñanza en Nutrición y Salud | Adriana Godínez; Claudio Soto-Garita; Estela Cordero; Francisco Duarte; Hebleen Porras; José Luis Vargas; Mariela Gutiérrez; Melany Calderón; Sofia Herrera & Catalina García Castillo       |                                                                                            |
| EPI_ISL_6591750                                                                                                                                                                                                                                                                                                                                                                                                                                                                                                                                                                                                                                                                                                                                                                                                                                                 | AREA DE SALUD DE PAVAS                                          | Incienza, Instituto Costarricense de Investigación y Enseñanza en Nutrición y Salud | Adriana Godínez; Claudio Soto-Garita; Estela Cordero; Francisco Duarte; Hebleen Porras; José Luis Vargas; Mariela Gutiérrez & Sofia Herrera; Melany Calderón                                 |                                                                                            |
| EPI_ISL_6591418, EPI_ISL_6591425                                                                                                                                                                                                                                                                                                                                                                                                                                                                                                                                                                                                                                                                                                                                                                                                                                | AREA DE SALUD EL GUARCO                                         | Incienza, Instituto Costarricense de Investigación y Enseñanza en Nutrición y Salud | Adriana Godínez; Claudio Soto-Garita; Estela Cordero; Francisco Duarte; Hebleen Porras; José Luis Vargas; Mariela Gutiérrez; Melany Calderón; Sofia Herrera & Ana Marta Ballar               |                                                                                            |
| EPI_ISL_6591350, EPI_ISL_6591358, EPI_ISL_6591825                                                                                                                                                                                                                                                                                                                                                                                                                                                                                                                                                                                                                                                                                                                                                                                                               | AREA DE SALUD FLORENCIA                                         | Incienza, Instituto Costarricense de Investigación y Enseñanza en Nutrición y Salud | Adriana Godínez; Claudio Soto-Garita; Estela Cordero; Francisco Duarte; Hebleen Porras; José Luis Vargas; Mariela Gutiérrez & Sofia Herrera; Melany Calderón                                 |                                                                                            |
| EPI_ISL_6591764                                                                                                                                                                                                                                                                                                                                                                                                                                                                                                                                                                                                                                                                                                                                                                                                                                                 | AREA DE SALUD GOICOECHEA 2 - CLINICA DR. JIMENEZ NUÑEZ          | Incienza, Instituto Costarricense de Investigación y Enseñanza en Nutrición y Salud | Adriana Godínez; Claudio Soto-Garita; Estela Cordero; Francisco Duarte; Hebleen Porras; José Luis Vargas; Mariela Gutiérrez; Melany Calderón; Sofia Herrera & Jorge Leiva Quesada            |                                                                                            |
| EPI_ISL_6591693                                                                                                                                                                                                                                                                                                                                                                                                                                                                                                                                                                                                                                                                                                                                                                                                                                                 | AREA DE SALUD GOLFITO                                           | Incienza, Instituto Costarricense de Investigación y Enseñanza en Nutrición y Salud | Adriana Godínez; Claudio Soto-Garita; Estela Cordero; Francisco Duarte; Hebleen Porras; José Luis Vargas; Mariela Gutiérrez; Melany Calderón; Sofia Herrera & José Mora Bogantes             |                                                                                            |
| EPI_ISL_6591794                                                                                                                                                                                                                                                                                                                                                                                                                                                                                                                                                                                                                                                                                                                                                                                                                                                 | AREA DE SALUD HATILLO - CLINICA DR. SOLON NUÑEZ                 | Incienza, Instituto Costarricense de Investigación y Enseñanza en Nutrición y Salud | Adriana Godínez; Claudio Soto-Garita; Estela Cordero; Francisco Duarte; Hebleen Porras; José Luis Vargas; Mariela Gutiérrez; Melany Calderón; Sofia Herrera & Juliana Mora Cortés            |                                                                                            |
| EPI_ISL_6591564, EPI_ISL_6591569                                                                                                                                                                                                                                                                                                                                                                                                                                                                                                                                                                                                                                                                                                                                                                                                                                | AREA DE SALUD HEREDIA-CUBUJUQUI - CLINICA DR. FRANCISCO BOLAÑOS | Incienza, Instituto Costarricense de Investigación y Enseñanza en Nutrición y Salud | Adriana Godínez; Claudio Soto-Garita; Estela Cordero; Francisco Duarte; Hebleen Porras; José Luis Vargas; Mariela Gutiérrez & Sofia Herrera; Melany Calderón                                 |                                                                                            |
| EPI_ISL_6591547, EPI_ISL_6591550                                                                                                                                                                                                                                                                                                                                                                                                                                                                                                                                                                                                                                                                                                                                                                                                                                | AREA DE SALUD HEREDIA-VIRILLA                                   | Incienza, Instituto Costarricense de Investigación y Enseñanza en Nutrición y Salud | Adriana Godínez; Claudio Soto-Garita; Estela Cordero; Francisco Duarte; Hebleen Porras; José Luis Vargas; Mariela Gutiérrez & Sofia Herrera; Melany Calderón                                 |                                                                                            |
| EPI_ISL_6591475                                                                                                                                                                                                                                                                                                                                                                                                                                                                                                                                                                                                                                                                                                                                                                                                                                                 | AREA DE SALUD HOJANCHA                                          | Incienza, Instituto Costarricense de Investigación y Enseñanza en Nutrición y Salud | Adriana Godínez; Claudio Soto-Garita; Estela Cordero; Francisco Duarte; Hebleen Porras; José Luis Vargas; Mariela Gutiérrez; Melany Calderón; Sofia Herrera & Arnoldo Zamora                 |                                                                                            |
| EPI_ISL_6591661, EPI_ISL_6591668                                                                                                                                                                                                                                                                                                                                                                                                                                                                                                                                                                                                                                                                                                                                                                                                                                | AREA DE SALUD JICARAL ISLAS                                     | Incienza, Instituto Costarricense de Investigación y Enseñanza en Nutrición y Salud | Adriana Godínez; Claudio Soto-Garita; Estela Cordero; Francisco Duarte; Hebleen Porras; José Luis Vargas; Mariela Gutiérrez; Melany Calderón; Sofia Herrera & Adriana Bermúdez Espinoza      |                                                                                            |
| EPI_ISL_6591577, EPI_ISL_6591585                                                                                                                                                                                                                                                                                                                                                                                                                                                                                                                                                                                                                                                                                                                                                                                                                                | AREA DE SALUD LIMON                                             | Incienza, Instituto Costarricense de Investigación y Enseñanza en Nutrición y Salud | Adriana Godínez; Claudio Soto-Garita; Estela Cordero; Francisco Duarte; Hebleen Porras; José Luis Vargas; Mariela Gutiérrez & Sofia Herrera; Melany Calderón                                 |                                                                                            |
| EPI_ISL_6591759                                                                                                                                                                                                                                                                                                                                                                                                                                                                                                                                                                                                                                                                                                                                                                                                                                                 | AREA DE SALUD MATA REDONDA-HOSPITAL - CLINICA DR. MORENO CAÑAS  | Incienza, Instituto Costarricense de Investigación y Enseñanza en Nutrición y Salud | Adriana Godínez; Claudio Soto-Garita; Estela Cordero; Francisco Duarte; Hebleen Porras; José Luis Vargas; Mariela Gutiérrez; Melany Calderón; Sofia Herrera & Ricardo González Cascante      |                                                                                            |
| EPI_ISL_6591719                                                                                                                                                                                                                                                                                                                                                                                                                                                                                                                                                                                                                                                                                                                                                                                                                                                 | AREA DE SALUD MONTES DE ORO                                     | Incienza, Instituto Costarricense de Investigación y Enseñanza en Nutrición y Salud | Adriana Godínez; Claudio Soto-Garita; Estela Cordero; Francisco Duarte; Hebleen Porras; José Luis Vargas; Mariela Gutiérrez; Melany Calderón; Sofia Herrera & Sergio Mejia Iglesias          |                                                                                            |
| EPI_ISL_6591332, EPI_ISL_6591337, EPI_ISL_6591361, EPI_ISL_6591368                                                                                                                                                                                                                                                                                                                                                                                                                                                                                                                                                                                                                                                                                                                                                                                              | AREA DE SALUD NARANJO                                           | Incienza, Instituto Costarricense de Investigación y Enseñanza en Nutrición y Salud | Adriana Godínez; Claudio Soto-Garita; Estela Cordero; Francisco Duarte; Hebleen Porras; José Luis Vargas; Mariela Gutiérrez; Melany Calderón; Sofia Herrera & Josseth Umaña Fernández        |                                                                                            |
| EPI_ISL_6591410                                                                                                                                                                                                                                                                                                                                                                                                                                                                                                                                                                                                                                                                                                                                                                                                                                                 | AREA DE SALUD PALMARES                                          | Incienza, Instituto Costarricense de Investigación y Enseñanza en Nutrición y Salud | Adriana Godínez; Claudio Soto-Garita; Estela Cordero; Francisco Duarte; Hebleen Porras; José Luis Vargas; Mariela Gutiérrez; Melany Calderón; Sofia Herrera & Marcela Rodríguez Gómez        |                                                                                            |
| EPI_ISL_6591403                                                                                                                                                                                                                                                                                                                                                                                                                                                                                                                                                                                                                                                                                                                                                                                                                                                 | AREA DE SALUD POAS                                              | Incienza, Instituto Costarricense de Investigación y Enseñanza en Nutrición y Salud | Adriana Godínez; Claudio Soto-Garita; Estela Cordero; Francisco Duarte; Hebleen Porras; José Luis Vargas; Mariela Gutiérrez; Melany Calderón; Sofia Herrera & Andrea Arias Cerdas            |                                                                                            |
| EPI_ISL_6591509                                                                                                                                                                                                                                                                                                                                                                                                                                                                                                                                                                                                                                                                                                                                                                                                                                                 | AREA DE SALUD PUERTO VIEJO-SARAPIQUI                            | Incienza, Instituto Costarricense de Investigación y Enseñanza en Nutrición y Salud | Adriana Godínez; Claudio Soto-Garita; Estela Cordero; Francisco Duarte; Hebleen Porras; José Luis Vargas; Mariela Gutiérrez & Sofia Herrera; Melany Calderón                                 |                                                                                            |
| EPI_ISL_6591514                                                                                                                                                                                                                                                                                                                                                                                                                                                                                                                                                                                                                                                                                                                                                                                                                                                 | AREA DE SALUD SAN RAFAEL DE HEREDIA                             | Incienza, Instituto Costarricense de Investigación y Enseñanza en Nutrición y Salud | Adriana Godínez; Claudio Soto-Garita; Estela Cordero; Francisco Duarte; Hebleen Porras; José Luis Vargas; Mariela Gutiérrez; Melany Calderón; Sofia Herrera & Jeannette Ramírez Pacheco      |                                                                                            |
| EPI_ISL_6591520                                                                                                                                                                                                                                                                                                                                                                                                                                                                                                                                                                                                                                                                                                                                                                                                                                                 | AREA DE SALUD SANTA BARBARA                                     | Incienza, Instituto Costarricense de Investigación y Enseñanza en Nutrición y Salud | Adriana Godínez; Claudio Soto-Garita; Estela Cordero; Francisco Duarte; Hebleen Porras; José Luis Vargas; Mariela Gutiérrez; Melany Calderón; Sofia Herrera & Ruth Aguilar Monge             |                                                                                            |
| EPI_ISL_6591633, EPI_ISL_6591642                                                                                                                                                                                                                                                                                                                                                                                                                                                                                                                                                                                                                                                                                                                                                                                                                                | AREA DE SALUD SIQUIRRES                                         | Incienza, Instituto Costarricense de Investigación y Enseñanza en Nutrición y Salud | Adriana Godínez; Claudio Soto-Garita; Estela Cordero; Francisco Duarte; Hebleen Porras; José Luis Vargas; Mariela Gutiérrez & Sofia Herrera; Melany Calderón                                 |                                                                                            |
| EPI_ISL_6591601, EPI_ISL_6591612                                                                                                                                                                                                                                                                                                                                                                                                                                                                                                                                                                                                                                                                                                                                                                                                                                | AREA DE SALUD TALAMANCA                                         | Incienza, Instituto Costarricense de Investigación y Enseñanza en Nutrición y Salud | Adriana Godínez; Claudio Soto-Garita; Estela Cordero; Francisco Duarte; Hebleen Porras; José Luis Vargas; Mariela Gutiérrez; Melany Calderón; Sofia Herrera & Mariana Russell White          |                                                                                            |
| EPI_ISL_6591737, EPI_ISL_6591742                                                                                                                                                                                                                                                                                                                                                                                                                                                                                                                                                                                                                                                                                                                                                                                                                                | AREA DE SALUD TIBAS-URUCA-MERCED - CLINICA DR. CLORITO PICARON  | Incienza, Instituto Costarricense de Investigación y Enseñanza en Nutrición y Salud | Adriana Godínez; Claudio Soto-Garita; Estela Cordero; Francisco Duarte; Hebleen Porras; José Luis Vargas; Mariela Gutiérrez & Sofia Herrera; Melany Calderón                                 |                                                                                            |
| EPI_ISL_6591494                                                                                                                                                                                                                                                                                                                                                                                                                                                                                                                                                                                                                                                                                                                                                                                                                                                 | AREA DE SALUD TILARAN                                           | Incienza, Instituto Costarricense de Investigación y Enseñanza en Nutrición y Salud | Adriana Godínez; Claudio Soto-Garita; Estela Cordero; Francisco Duarte; Hebleen Porras; José Luis Vargas; Mariela Gutiérrez; Melany Calderón; Sofia Herrera & Arnoldo Zamora                 |                                                                                            |
| EPI_ISL_6591788                                                                                                                                                                                                                                                                                                                                                                                                                                                                                                                                                                                                                                                                                                                                                                                                                                                 | AREA DE SALUD ZAPOTE-CATEDRAL - CLINICA DR. CARLOS DURAN        | Incienza, Instituto Costarricense de Investigación y Enseñanza en Nutrición y Salud | Adriana Godínez; Claudio Soto-Garita; Estela Cordero; Francisco Duarte; Hebleen Porras; José Luis Vargas; Mariela Gutiérrez; Melany Calderón; Sofia Herrera & Juliana Mora Cortés            |                                                                                            |
| EPI_ISL_6588158                                                                                                                                                                                                                                                                                                                                                                                                                                                                                                                                                                                                                                                                                                                                                                                                                                                 | ARS Alentejo                                                    | Instituto Nacional de Saude (INSA)                                                  | Borges et al                                                                                                                                                                                 |                                                                                            |
| EPI_ISL_6588004, EPI_ISL_6588005, EPI_ISL_6588006, EPI_ISL_6588007, EPI_ISL_6588008, EPI_ISL_6588009, EPI_ISL_6588010, EPI_ISL_6588011, EPI_ISL_6588012, EPI_ISL_6588013, EPI_ISL_6588014, EPI_ISL_6588015, EPI_ISL_6588016, EPI_ISL_6588017, EPI_ISL_6588019, EPI_ISL_6588020, EPI_ISL_6588021, EPI_ISL_6588022, EPI_ISL_6588023, EPI_ISL_6588024, EPI_ISL_6588025, EPI_ISL_6588026, EPI_ISL_6588027, EPI_ISL_6588028, EPI_ISL_6588030, EPI_ISL_6588031, EPI_ISL_6588032, EPI_ISL_6588033, EPI_ISL_6588034, EPI_ISL_6588035, EPI_ISL_6588036, EPI_ISL_6588037, EPI_ISL_6588038, EPI_ISL_6588039, EPI_ISL_6588040, EPI_ISL_6588041, EPI_ISL_6588042, EPI_ISL_6588047, EPI_ISL_6588048, EPI_ISL_6588049, EPI_ISL_6588050, EPI_ISL_6588051, EPI_ISL_6588052, EPI_ISL_6588053, EPI_ISL_6588054, EPI_ISL_6588055, EPI_ISL_6588056, EPI_ISL_6588057, EPI_ISL_6588058 | see above                                                       | ARS Algarve - Laboratorio Laura Ayres                                               | Instituto Nacional de Saude (INSA)                                                                                                                                                           | Borges et al                                                                               |
| EPI_ISL_6594804, EPI_ISL_6594805, EPI_ISL_6594806, EPI_ISL_6594807, EPI_ISL_6594808, EPI_ISL_6602329                                                                                                                                                                                                                                                                                                                                                                                                                                                                                                                                                                                                                                                                                                                                                            | see above                                                       | Accelerated Clinical Laboratories                                                   | City of Milwaukee Health Department Laboratory                                                                                                                                               | Amy Bauer; Manjeet Khubbar; Nandhakumar Balakrishnan; Samantha Scott; Sanjib Bhattacharyya |





|                                                                                                                                                                                                                                                                                                                                                                                                                                                                                                                                                                                                                                                                                                                                                                                                                                                                                                                                                                                                                                                                                                                                                                                                                                                                                                                                                                                                                                                                                                                                                                                                                                                                                                                                                                                                                                                         |                                                                                                 |                                                                                                  |                                                                                                                                                                                                                                                                                                                              |
|---------------------------------------------------------------------------------------------------------------------------------------------------------------------------------------------------------------------------------------------------------------------------------------------------------------------------------------------------------------------------------------------------------------------------------------------------------------------------------------------------------------------------------------------------------------------------------------------------------------------------------------------------------------------------------------------------------------------------------------------------------------------------------------------------------------------------------------------------------------------------------------------------------------------------------------------------------------------------------------------------------------------------------------------------------------------------------------------------------------------------------------------------------------------------------------------------------------------------------------------------------------------------------------------------------------------------------------------------------------------------------------------------------------------------------------------------------------------------------------------------------------------------------------------------------------------------------------------------------------------------------------------------------------------------------------------------------------------------------------------------------------------------------------------------------------------------------------------------------|-------------------------------------------------------------------------------------------------|--------------------------------------------------------------------------------------------------|------------------------------------------------------------------------------------------------------------------------------------------------------------------------------------------------------------------------------------------------------------------------------------------------------------------------------|
| EPI_ISL_6597306, EPI_ISL_6597310, EPI_ISL_6597404, EPI_ISL_6597408, EPI_ISL_6597413, EPI_ISL_6597507, EPI_ISL_6597511, EPI_ISL_6597513                                                                                                                                                                                                                                                                                                                                                                                                                                                                                                                                                                                                                                                                                                                                                                                                                                                                                                                                                                                                                                                                                                                                                                                                                                                                                                                                                                                                                                                                                                                                                                                                                                                                                                                  | Colorado Department of Public Health and Environment                                            | Colorado Department of Public Health and Environment                                             | Alexandria Rosheim; Diana Ir; Emily A. Travanty; Laura Bankers; Mandy Waters; Michael A. Martin; Michael Martin; Molly C. Hetherington-Rauth; Sarah Elizabeth Totten; Shannon R. Matzinger                                                                                                                                   |
| see above                                                                                                                                                                                                                                                                                                                                                                                                                                                                                                                                                                                                                                                                                                                                                                                                                                                                                                                                                                                                                                                                                                                                                                                                                                                                                                                                                                                                                                                                                                                                                                                                                                                                                                                                                                                                                                               |                                                                                                 |                                                                                                  |                                                                                                                                                                                                                                                                                                                              |
| EPI_ISL_6596766, EPI_ISL_6596768, EPI_ISL_6596776, EPI_ISL_6596779, EPI_ISL_6596782, EPI_ISL_6596788, EPI_ISL_6596791, EPI_ISL_6596800, EPI_ISL_6596805, EPI_ISL_6596809, EPI_ISL_6596813, EPI_ISL_6596827, EPI_ISL_6596830, EPI_ISL_6596839, EPI_ISL_6596844, EPI_ISL_6596853, EPI_ISL_6596864, EPI_ISL_6596869, EPI_ISL_6596875, EPI_ISL_6596880, EPI_ISL_6596886, EPI_ISL_6596897, EPI_ISL_6596904, EPI_ISL_6596910, EPI_ISL_6596922, EPI_ISL_6596927, EPI_ISL_6596935, EPI_ISL_6596972, EPI_ISL_6596978, EPI_ISL_6596981                                                                                                                                                                                                                                                                                                                                                                                                                                                                                                                                                                                                                                                                                                                                                                                                                                                                                                                                                                                                                                                                                                                                                                                                                                                                                                                            | Colorado Mesa University                                                                        | Infectious Disease Program, Broad Institute of Harvard and MIT                                   | Adams, G.; B.L.; B.W.; Bauer, M.; Birren; Bronson, A.; Carter, A.; Chaluvadi, S.; D.J.; DeRuff, K.; Gallagher, G.; Gladden-Young, A.; J.E.; K.J.; Lagerborg, K.; Lemieux; Loreth, C.; MacInnis; Marshall, J.; Normandin, E.; O'Neill, M.; P.C.; Park; Reilly, S.; Rudy, M.; Siddle; Smole, S.; Tomkins-Tinch, C.; and Sabeti |
| see above                                                                                                                                                                                                                                                                                                                                                                                                                                                                                                                                                                                                                                                                                                                                                                                                                                                                                                                                                                                                                                                                                                                                                                                                                                                                                                                                                                                                                                                                                                                                                                                                                                                                                                                                                                                                                                               |                                                                                                 |                                                                                                  |                                                                                                                                                                                                                                                                                                                              |
| EPI_ISL_6596026, EPI_ISL_6596027, EPI_ISL_6596028, EPI_ISL_6596029, EPI_ISL_6596030, EPI_ISL_6596031, EPI_ISL_6596032, EPI_ISL_6596033, EPI_ISL_6596034, EPI_ISL_6596035, EPI_ISL_6596036, EPI_ISL_6596037, EPI_ISL_6596038, EPI_ISL_6596039, EPI_ISL_6596040, EPI_ISL_6596041, EPI_ISL_6596043, EPI_ISL_6596044, EPI_ISL_6596045, EPI_ISL_6596046, EPI_ISL_6596047, EPI_ISL_6596048, EPI_ISL_6596049, EPI_ISL_6596050, EPI_ISL_6596052                                                                                                                                                                                                                                                                                                                                                                                                                                                                                                                                                                                                                                                                                                                                                                                                                                                                                                                                                                                                                                                                                                                                                                                                                                                                                                                                                                                                                 | Dept. of Microbiology and Infection Control, Akershus University Hospital HF                    | Dept. of Microbiology and Infection Control, Akershus University Hospital HF                     | Alexander Hesselberg Lovestad; Hege Vangstein Aamot                                                                                                                                                                                                                                                                          |
| see above                                                                                                                                                                                                                                                                                                                                                                                                                                                                                                                                                                                                                                                                                                                                                                                                                                                                                                                                                                                                                                                                                                                                                                                                                                                                                                                                                                                                                                                                                                                                                                                                                                                                                                                                                                                                                                               |                                                                                                 |                                                                                                  |                                                                                                                                                                                                                                                                                                                              |
| EPI_ISL_6590624, EPI_ISL_6590625, EPI_ISL_6590626, EPI_ISL_6590631, EPI_ISL_6590636, EPI_ISL_6590637, EPI_ISL_6590638, EPI_ISL_6590642, EPI_ISL_6590643, EPI_ISL_6590644, EPI_ISL_6590647, EPI_ISL_6590648, EPI_ISL_6590649, EPI_ISL_6590737, EPI_ISL_6590738, EPI_ISL_6590745, EPI_ISL_6590748, EPI_ISL_6590754                                                                                                                                                                                                                                                                                                                                                                                                                                                                                                                                                                                                                                                                                                                                                                                                                                                                                                                                                                                                                                                                                                                                                                                                                                                                                                                                                                                                                                                                                                                                        | Diagnostyka S.A.                                                                                | Wojewodzka Stacja Sanitarno-Epidemiologiczna w Gorzowie Wielkopolskim                            | Elzbieta Justynska; Klaudia Kobenda-Wlodarczak; Patrycja Faberska and Marek Margol; Renata Siegel                                                                                                                                                                                                                            |
| see above                                                                                                                                                                                                                                                                                                                                                                                                                                                                                                                                                                                                                                                                                                                                                                                                                                                                                                                                                                                                                                                                                                                                                                                                                                                                                                                                                                                                                                                                                                                                                                                                                                                                                                                                                                                                                                               |                                                                                                 |                                                                                                  |                                                                                                                                                                                                                                                                                                                              |
| EPI_ISL_6589624, EPI_ISL_6589640, EPI_ISL_6589643                                                                                                                                                                                                                                                                                                                                                                                                                                                                                                                                                                                                                                                                                                                                                                                                                                                                                                                                                                                                                                                                                                                                                                                                                                                                                                                                                                                                                                                                                                                                                                                                                                                                                                                                                                                                       | Dr. Risch AG                                                                                    | Microbiology Dr. Risch Buchs                                                                     | Dominique Fabien Hilti; Faina Wehrli; Lorenz Risch; Martin Risch; Nadia Wohlwend; Sinem Kas; Thomas Bodmer                                                                                                                                                                                                                   |
| see above                                                                                                                                                                                                                                                                                                                                                                                                                                                                                                                                                                                                                                                                                                                                                                                                                                                                                                                                                                                                                                                                                                                                                                                                                                                                                                                                                                                                                                                                                                                                                                                                                                                                                                                                                                                                                                               |                                                                                                 |                                                                                                  |                                                                                                                                                                                                                                                                                                                              |
| EPI_ISL_6589533, EPI_ISL_6589540, EPI_ISL_6589541, EPI_ISL_6589542, EPI_ISL_6589543, EPI_ISL_6589545, EPI_ISL_6589546, EPI_ISL_6589548, EPI_ISL_6589549, EPI_ISL_6589550, EPI_ISL_6589552, EPI_ISL_6589553, EPI_ISL_6589554, EPI_ISL_6589555, EPI_ISL_6589556, EPI_ISL_6589557, EPI_ISL_6589559, EPI_ISL_6589560, EPI_ISL_6589562, EPI_ISL_6589564, EPI_ISL_6589565, EPI_ISL_6589566, EPI_ISL_6589567, EPI_ISL_6589569, EPI_ISL_6589570, EPI_ISL_6589571, EPI_ISL_6589572, EPI_ISL_6589573, EPI_ISL_6589574, EPI_ISL_6589575, EPI_ISL_6589576, EPI_ISL_6589577, EPI_ISL_6589578, EPI_ISL_6589579, EPI_ISL_6589580, EPI_ISL_6589581, EPI_ISL_6589582, EPI_ISL_6589584, EPI_ISL_6589589, EPI_ISL_6589590, EPI_ISL_6589591, EPI_ISL_6589595, EPI_ISL_6589605, EPI_ISL_6589612, EPI_ISL_6589613, EPI_ISL_6589614, EPI_ISL_6589617, EPI_ISL_6589619, EPI_ISL_6589620, EPI_ISL_6589623, EPI_ISL_6589624, EPI_ISL_6589625, EPI_ISL_6589626, EPI_ISL_6589627, EPI_ISL_6589628, EPI_ISL_6589629, EPI_ISL_6589630, EPI_ISL_6589631, EPI_ISL_6589632, EPI_ISL_6589633, EPI_ISL_6589634, EPI_ISL_6589635, EPI_ISL_6589636, EPI_ISL_6589637, EPI_ISL_6589638, EPI_ISL_6589639, EPI_ISL_6589640, EPI_ISL_6589641, EPI_ISL_6589642, EPI_ISL_6589643, EPI_ISL_6589644, EPI_ISL_6589645, EPI_ISL_6589646, EPI_ISL_6589647, EPI_ISL_6589648, EPI_ISL_6589649, EPI_ISL_6589650, EPI_ISL_6589651, EPI_ISL_6589652, EPI_ISL_6589653, EPI_ISL_6589654, EPI_ISL_6589655, EPI_ISL_6589656, EPI_ISL_6589657, EPI_ISL_6589658, EPI_ISL_6589659, EPI_ISL_6589660, EPI_ISL_6589661, EPI_ISL_6589662, EPI_ISL_6589663, EPI_ISL_6589664, EPI_ISL_6589665, EPI_ISL_6589666, EPI_ISL_6589667, EPI_ISL_6589668, EPI_ISL_6589669, EPI_ISL_6589670, EPI_ISL_6589671, EPI_ISL_6589672, EPI_ISL_6589673, EPI_ISL_6589674, EPI_ISL_6589675, EPI_ISL_6589676, EPI_ISL_6589677, EPI_ISL_6589678 | Dr. Risch Ostschweiz AG                                                                         | Microbiology Dr. Risch Buchs                                                                     | Dominique Fabien Hilti; Faina Wehrli; Lorenz Risch; Martin Risch; Nadia Wohlwend; Sinem Kas; Thomas Bodmer                                                                                                                                                                                                                   |
| see above                                                                                                                                                                                                                                                                                                                                                                                                                                                                                                                                                                                                                                                                                                                                                                                                                                                                                                                                                                                                                                                                                                                                                                                                                                                                                                                                                                                                                                                                                                                                                                                                                                                                                                                                                                                                                                               |                                                                                                 |                                                                                                  |                                                                                                                                                                                                                                                                                                                              |
| EPI_ISL_6590623, EPI_ISL_6590627, EPI_ISL_6590630, EPI_ISL_6590632, EPI_ISL_6590639, EPI_ISL_6590640, EPI_ISL_6590645, EPI_ISL_6590739, EPI_ISL_6590740, EPI_ISL_6590742, EPI_ISL_6590750, EPI_ISL_6590751                                                                                                                                                                                                                                                                                                                                                                                                                                                                                                                                                                                                                                                                                                                                                                                                                                                                                                                                                                                                                                                                                                                                                                                                                                                                                                                                                                                                                                                                                                                                                                                                                                              | Dzial Diagnostyki Laboratoryjnej                                                                | Wojewodzka Stacja Sanitarno-Epidemiologiczna w Gorzowie Wielkopolskim                            | Elzbieta Justynska; Klaudia Kobenda-Wlodarczak; Patrycja Faberska and Marek Margol; Renata Siegel                                                                                                                                                                                                                            |
| see above                                                                                                                                                                                                                                                                                                                                                                                                                                                                                                                                                                                                                                                                                                                                                                                                                                                                                                                                                                                                                                                                                                                                                                                                                                                                                                                                                                                                                                                                                                                                                                                                                                                                                                                                                                                                                                               |                                                                                                 |                                                                                                  |                                                                                                                                                                                                                                                                                                                              |
| EPI_ISL_6589437                                                                                                                                                                                                                                                                                                                                                                                                                                                                                                                                                                                                                                                                                                                                                                                                                                                                                                                                                                                                                                                                                                                                                                                                                                                                                                                                                                                                                                                                                                                                                                                                                                                                                                                                                                                                                                         | EHNW                                                                                            | Laboratory of genomics and metagenomics                                                          | Claire Bertelli; Damien Jacot; Gilbert Greub; Sébastien Aebly; Trestan Pillonel                                                                                                                                                                                                                                              |
| see above                                                                                                                                                                                                                                                                                                                                                                                                                                                                                                                                                                                                                                                                                                                                                                                                                                                                                                                                                                                                                                                                                                                                                                                                                                                                                                                                                                                                                                                                                                                                                                                                                                                                                                                                                                                                                                               |                                                                                                 |                                                                                                  |                                                                                                                                                                                                                                                                                                                              |
| EPI_ISL_6589455, EPI_ISL_6589456, EPI_ISL_6589458, EPI_ISL_6589466, EPI_ISL_6589469, EPI_ISL_6589470, EPI_ISL_6589473, EPI_ISL_6589483, EPI_ISL_6589484, EPI_ISL_6589488, EPI_ISL_6589490, EPI_ISL_6589492, EPI_ISL_6589493, EPI_ISL_6589495, EPI_ISL_6589496, EPI_ISL_6589497, EPI_ISL_6589499, EPI_ISL_6589500, EPI_ISL_6589501, EPI_ISL_6589502, EPI_ISL_6589503, EPI_ISL_6589504, EPI_ISL_6589508, EPI_ISL_6589509, EPI_ISL_6589510, EPI_ISL_6589511, EPI_ISL_6589519, EPI_ISL_6589521, EPI_ISL_6589524, EPI_ISL_6589526, EPI_ISL_6589529, EPI_ISL_6589530, EPI_ISL_6589531, EPI_ISL_6589535, EPI_ISL_6589536                                                                                                                                                                                                                                                                                                                                                                                                                                                                                                                                                                                                                                                                                                                                                                                                                                                                                                                                                                                                                                                                                                                                                                                                                                       | Ender Diagnostics AG                                                                            | Microbiology Dr. Risch Buchs                                                                     | Dominique Fabien Hilti; Faina Wehrli; Lorenz Risch; Martin Risch; Nadia Wohlwend; Sinem Kas; Thomas Bodmer                                                                                                                                                                                                                   |
| see above                                                                                                                                                                                                                                                                                                                                                                                                                                                                                                                                                                                                                                                                                                                                                                                                                                                                                                                                                                                                                                                                                                                                                                                                                                                                                                                                                                                                                                                                                                                                                                                                                                                                                                                                                                                                                                               |                                                                                                 |                                                                                                  |                                                                                                                                                                                                                                                                                                                              |
| EPI_ISL_6602310                                                                                                                                                                                                                                                                                                                                                                                                                                                                                                                                                                                                                                                                                                                                                                                                                                                                                                                                                                                                                                                                                                                                                                                                                                                                                                                                                                                                                                                                                                                                                                                                                                                                                                                                                                                                                                         | Florida Bureau of Public Health Laboratories                                                    | Florida Bureau of Public Health Laboratories                                                     | Jason Blanton; Namratha Tarigoppa; Sarah Schmedes; Tiffany Splatt                                                                                                                                                                                                                                                            |
| see above                                                                                                                                                                                                                                                                                                                                                                                                                                                                                                                                                                                                                                                                                                                                                                                                                                                                                                                                                                                                                                                                                                                                                                                                                                                                                                                                                                                                                                                                                                                                                                                                                                                                                                                                                                                                                                               |                                                                                                 |                                                                                                  |                                                                                                                                                                                                                                                                                                                              |
| EPI_ISL_6584443, EPI_ISL_6584444, EPI_ISL_6584445, EPI_ISL_6584446, EPI_ISL_6584447, EPI_ISL_6584448, EPI_ISL_6584449, EPI_ISL_6584450, EPI_ISL_6584451, EPI_ISL_6584452, EPI_ISL_6584453, EPI_ISL_6584454, EPI_ISL_6584455, EPI_ISL_6584456, EPI_ISL_6584457, EPI_ISL_6584458, EPI_ISL_6584459, EPI_ISL_6584460, EPI_ISL_6584461, EPI_ISL_6584462, EPI_ISL_6584463, EPI_ISL_6584464, EPI_ISL_6584465, EPI_ISL_6584466, EPI_ISL_6584467, EPI_ISL_6584468, EPI_ISL_6584469, EPI_ISL_6584470, EPI_ISL_6584471, EPI_ISL_6584472, EPI_ISL_6584473, EPI_ISL_6584474, EPI_ISL_6584475, EPI_ISL_6584476, EPI_ISL_6584477, EPI_ISL_6584478, EPI_ISL_6584479, EPI_ISL_6584480, EPI_ISL_6584481, EPI_ISL_6584482, EPI_ISL_6584483, EPI_ISL_6584484, EPI_ISL_6584485, EPI_ISL_6584486, EPI_ISL_6584487, EPI_ISL_6584488, EPI_ISL_6584489, EPI_ISL_6584490, EPI_ISL_6584491                                                                                                                                                                                                                                                                                                                                                                                                                                                                                                                                                                                                                                                                                                                                                                                                                                                                                                                                                                                         | Genome Information Research Center, Research Institute for Microbial Diseases, Osaka University | Genome Information Research Center, Research Institute for Microbial Diseases, Osaka University  | Daisuke Motooka; Hiroya Oki; Kentaro Tanaka; and Shota Nakamura                                                                                                                                                                                                                                                              |
| see above                                                                                                                                                                                                                                                                                                                                                                                                                                                                                                                                                                                                                                                                                                                                                                                                                                                                                                                                                                                                                                                                                                                                                                                                                                                                                                                                                                                                                                                                                                                                                                                                                                                                                                                                                                                                                                               |                                                                                                 |                                                                                                  |                                                                                                                                                                                                                                                                                                                              |
| EPI_ISL_6587921, EPI_ISL_6587924                                                                                                                                                                                                                                                                                                                                                                                                                                                                                                                                                                                                                                                                                                                                                                                                                                                                                                                                                                                                                                                                                                                                                                                                                                                                                                                                                                                                                                                                                                                                                                                                                                                                                                                                                                                                                        | Government Medical College, Surat                                                               | Gujarat Biotechnology Research Centre                                                            | Apurvashin Puvav; Bhadreshsinh Gohil; Chaitanya Joshi; Dinesh Kumar; Janvi Raval; Madhvi Joshi; Netta Khandelwal; Nimesh Patel; Nirmal Vaniwala; Nitin Savaliya; Nitin Shukla; Priyank Chavda; Ramesh Pandit; Sonal Sharma; Zarna Patel                                                                                      |
| see above                                                                                                                                                                                                                                                                                                                                                                                                                                                                                                                                                                                                                                                                                                                                                                                                                                                                                                                                                                                                                                                                                                                                                                                                                                                                                                                                                                                                                                                                                                                                                                                                                                                                                                                                                                                                                                               |                                                                                                 |                                                                                                  |                                                                                                                                                                                                                                                                                                                              |
| EPI_ISL_6587988, EPI_ISL_6587989, EPI_ISL_6587990, EPI_ISL_6587992, EPI_ISL_6587993, EPI_ISL_6587994, EPI_ISL_6587995, EPI_ISL_6587996                                                                                                                                                                                                                                                                                                                                                                                                                                                                                                                                                                                                                                                                                                                                                                                                                                                                                                                                                                                                                                                                                                                                                                                                                                                                                                                                                                                                                                                                                                                                                                                                                                                                                                                  | H Braga                                                                                         | Instituto Nacional de Saude (INSA)                                                               | Borges et al                                                                                                                                                                                                                                                                                                                 |
| see above                                                                                                                                                                                                                                                                                                                                                                                                                                                                                                                                                                                                                                                                                                                                                                                                                                                                                                                                                                                                                                                                                                                                                                                                                                                                                                                                                                                                                                                                                                                                                                                                                                                                                                                                                                                                                                               |                                                                                                 |                                                                                                  |                                                                                                                                                                                                                                                                                                                              |
| EPI_ISL_6588210, EPI_ISL_6588212, EPI_ISL_6588214, EPI_ISL_6588215, EPI_ISL_6588216, EPI_ISL_6588221, EPI_ISL_6588224, EPI_ISL_6588225, EPI_ISL_6588227, EPI_ISL_6588231, EPI_ISL_6588232, EPI_ISL_6588235, EPI_ISL_6588236                                                                                                                                                                                                                                                                                                                                                                                                                                                                                                                                                                                                                                                                                                                                                                                                                                                                                                                                                                                                                                                                                                                                                                                                                                                                                                                                                                                                                                                                                                                                                                                                                             | H Divino Espirito Santo - Ponta Delgada                                                         | Instituto Nacional de Saude (INSA)                                                               | Borges et al                                                                                                                                                                                                                                                                                                                 |
| see above                                                                                                                                                                                                                                                                                                                                                                                                                                                                                                                                                                                                                                                                                                                                                                                                                                                                                                                                                                                                                                                                                                                                                                                                                                                                                                                                                                                                                                                                                                                                                                                                                                                                                                                                                                                                                                               |                                                                                                 |                                                                                                  |                                                                                                                                                                                                                                                                                                                              |
| EPI_ISL_6588237, EPI_ISL_6588238, EPI_ISL_6588239                                                                                                                                                                                                                                                                                                                                                                                                                                                                                                                                                                                                                                                                                                                                                                                                                                                                                                                                                                                                                                                                                                                                                                                                                                                                                                                                                                                                                                                                                                                                                                                                                                                                                                                                                                                                       | H Evora                                                                                         | Instituto Nacional de Saude (INSA)                                                               | Borges et al                                                                                                                                                                                                                                                                                                                 |
| see above                                                                                                                                                                                                                                                                                                                                                                                                                                                                                                                                                                                                                                                                                                                                                                                                                                                                                                                                                                                                                                                                                                                                                                                                                                                                                                                                                                                                                                                                                                                                                                                                                                                                                                                                                                                                                                               |                                                                                                 |                                                                                                  |                                                                                                                                                                                                                                                                                                                              |
| EPI_ISL_6587997, EPI_ISL_6587998, EPI_ISL_6587999, EPI_ISL_6588001, EPI_ISL_6588002                                                                                                                                                                                                                                                                                                                                                                                                                                                                                                                                                                                                                                                                                                                                                                                                                                                                                                                                                                                                                                                                                                                                                                                                                                                                                                                                                                                                                                                                                                                                                                                                                                                                                                                                                                     | H Fernando Fonseca                                                                              | Instituto Nacional de Saude (INSA)                                                               | Borges et al                                                                                                                                                                                                                                                                                                                 |
| see above                                                                                                                                                                                                                                                                                                                                                                                                                                                                                                                                                                                                                                                                                                                                                                                                                                                                                                                                                                                                                                                                                                                                                                                                                                                                                                                                                                                                                                                                                                                                                                                                                                                                                                                                                                                                                                               |                                                                                                 |                                                                                                  |                                                                                                                                                                                                                                                                                                                              |
| EPI_ISL_6588240, EPI_ISL_6588241, EPI_ISL_6588242, EPI_ISL_6588243                                                                                                                                                                                                                                                                                                                                                                                                                                                                                                                                                                                                                                                                                                                                                                                                                                                                                                                                                                                                                                                                                                                                                                                                                                                                                                                                                                                                                                                                                                                                                                                                                                                                                                                                                                                      | H Guimaraes                                                                                     | Instituto Nacional de Saude (INSA)                                                               | Borges et al                                                                                                                                                                                                                                                                                                                 |
| see above                                                                                                                                                                                                                                                                                                                                                                                                                                                                                                                                                                                                                                                                                                                                                                                                                                                                                                                                                                                                                                                                                                                                                                                                                                                                                                                                                                                                                                                                                                                                                                                                                                                                                                                                                                                                                                               |                                                                                                 |                                                                                                  |                                                                                                                                                                                                                                                                                                                              |
| EPI_ISL_6588437, EPI_ISL_6588438, EPI_ISL_6588439, EPI_ISL_6588440, EPI_ISL_6588441, EPI_ISL_6588442, EPI_ISL_6588443, EPI_ISL_6588444, EPI_ISL_6588445, EPI_ISL_6588446                                                                                                                                                                                                                                                                                                                                                                                                                                                                                                                                                                                                                                                                                                                                                                                                                                                                                                                                                                                                                                                                                                                                                                                                                                                                                                                                                                                                                                                                                                                                                                                                                                                                                | H Santarem                                                                                      | Instituto Nacional de Saude (INSA) and Institute of Biomedicine (IBiMed), Universidade de Aveiro | Borges et al                                                                                                                                                                                                                                                                                                                 |
| see above                                                                                                                                                                                                                                                                                                                                                                                                                                                                                                                                                                                                                                                                                                                                                                                                                                                                                                                                                                                                                                                                                                                                                                                                                                                                                                                                                                                                                                                                                                                                                                                                                                                                                                                                                                                                                                               |                                                                                                 |                                                                                                  |                                                                                                                                                                                                                                                                                                                              |
| EPI_ISL_6588415, EPI_ISL_6588416, EPI_ISL_6588417, EPI_ISL_6588418, EPI_ISL_6588419, EPI_ISL_6588420, EPI_ISL_6588421, EPI_ISL_6588422                                                                                                                                                                                                                                                                                                                                                                                                                                                                                                                                                                                                                                                                                                                                                                                                                                                                                                                                                                                                                                                                                                                                                                                                                                                                                                                                                                                                                                                                                                                                                                                                                                                                                                                  | H Vila Franca Xira                                                                              | Instituto Nacional de Saude (INSA) and Institute of Biomedicine (IBiMed), Universidade de Aveiro | Borges et al                                                                                                                                                                                                                                                                                                                 |
| see above                                                                                                                                                                                                                                                                                                                                                                                                                                                                                                                                                                                                                                                                                                                                                                                                                                                                                                                                                                                                                                                                                                                                                                                                                                                                                                                                                                                                                                                                                                                                                                                                                                                                                                                                                                                                                                               |                                                                                                 |                                                                                                  |                                                                                                                                                                                                                                                                                                                              |
| EPI_ISL_6589445                                                                                                                                                                                                                                                                                                                                                                                                                                                                                                                                                                                                                                                                                                                                                                                                                                                                                                                                                                                                                                                                                                                                                                                                                                                                                                                                                                                                                                                                                                                                                                                                                                                                                                                                                                                                                                         | HIB                                                                                             | Laboratory of genomics and metagenomics                                                          | Claire Bertelli; Damien Jacot; Gilbert Greub; Sébastien Aebly; Trestan Pillonel                                                                                                                                                                                                                                              |
| see above                                                                                                                                                                                                                                                                                                                                                                                                                                                                                                                                                                                                                                                                                                                                                                                                                                                                                                                                                                                                                                                                                                                                                                                                                                                                                                                                                                                                                                                                                                                                                                                                                                                                                                                                                                                                                                               |                                                                                                 |                                                                                                  |                                                                                                                                                                                                                                                                                                                              |
| EPI_ISL_6594120, EPI_ISL_6594121, EPI_ISL_6594145, EPI_ISL_6594155, EPI_ISL_6594165, EPI_ISL_6594182, EPI_ISL_6594183, EPI_ISL_6594184, EPI_ISL_6594192                                                                                                                                                                                                                                                                                                                                                                                                                                                                                                                                                                                                                                                                                                                                                                                                                                                                                                                                                                                                                                                                                                                                                                                                                                                                                                                                                                                                                                                                                                                                                                                                                                                                                                 | HOSPITAL CAN MISSES                                                                             | HOSPITAL UNIVERSITARIO SON ESPASES                                                               | Dr. Antonio Oliver; Dr. Carla López-Causapé; Dr. Gabriel Cabot; Hospital Universitario Son Espases; on behalf of Servicio de Microbiología                                                                                                                                                                                   |
| see above                                                                                                                                                                                                                                                                                                                                                                                                                                                                                                                                                                                                                                                                                                                                                                                                                                                                                                                                                                                                                                                                                                                                                                                                                                                                                                                                                                                                                                                                                                                                                                                                                                                                                                                                                                                                                                               |                                                                                                 |                                                                                                  |                                                                                                                                                                                                                                                                                                                              |
| EPI_ISL_6591714                                                                                                                                                                                                                                                                                                                                                                                                                                                                                                                                                                                                                                                                                                                                                                                                                                                                                                                                                                                                                                                                                                                                                                                                                                                                                                                                                                                                                                                                                                                                                                                                                                                                                                                                                                                                                                         | HOSPITAL DE CIUDAD NEILY                                                                        | Incienza, Instituto Costarricense de Investigación y Enseñanza en Nutrición y Salud              | Adriana Godínez; Claudio Soto-Garita; Estela Cordero; Francisco Duarte; Hebleen Porras; José Luis Vargas; Mariela Gutiérrez; Melany Calderón; Sofia Herrera & Catalina Garcia Castillo                                                                                                                                       |
| see above                                                                                                                                                                                                                                                                                                                                                                                                                                                                                                                                                                                                                                                                                                                                                                                                                                                                                                                                                                                                                                                                                                                                                                                                                                                                                                                                                                                                                                                                                                                                                                                                                                                                                                                                                                                                                                               |                                                                                                 |                                                                                                  |                                                                                                                                                                                                                                                                                                                              |
| EPI_ISL_6591443, EPI_ISL_6591447, EPI_ISL_6591463, EPI_ISL_6591499, EPI_ISL_6591505                                                                                                                                                                                                                                                                                                                                                                                                                                                                                                                                                                                                                                                                                                                                                                                                                                                                                                                                                                                                                                                                                                                                                                                                                                                                                                                                                                                                                                                                                                                                                                                                                                                                                                                                                                     | HOSPITAL DR. ENRIQUE BALTODANO BRICEÑO                                                          | Incienza, Instituto Costarricense de Investigación y Enseñanza en Nutrición y Salud              | Adriana Godínez; Claudio Soto-Garita; Estela Cordero; Francisco Duarte; Hebleen Porras; José Luis Vargas; Mariela Gutiérrez; Melany Calderón; Sofia Herrera & Adriana Bermúdez Espinoza; Sofia Herrera & Arnoldo Zamora                                                                                                      |
| see above                                                                                                                                                                                                                                                                                                                                                                                                                                                                                                                                                                                                                                                                                                                                                                                                                                                                                                                                                                                                                                                                                                                                                                                                                                                                                                                                                                                                                                                                                                                                                                                                                                                                                                                                                                                                                                               |                                                                                                 |                                                                                                  |                                                                                                                                                                                                                                                                                                                              |
| EPI_ISL_6591771, EPI_ISL_6591777                                                                                                                                                                                                                                                                                                                                                                                                                                                                                                                                                                                                                                                                                                                                                                                                                                                                                                                                                                                                                                                                                                                                                                                                                                                                                                                                                                                                                                                                                                                                                                                                                                                                                                                                                                                                                        | HOSPITAL DR. FERNANDO ESCALANTE PRADILLA                                                        | Incienza, Instituto Costarricense de Investigación y Enseñanza en Nutrición y Salud              | Adriana Godínez; Claudio Soto-Garita; Estela Cordero; Francisco Duarte; Hebleen Porras; José Luis Vargas; Mariela Gutiérrez; Melany Calderón; Sofia Herrera & Aura Vargas Monge                                                                                                                                              |
| see above                                                                                                                                                                                                                                                                                                                                                                                                                                                                                                                                                                                                                                                                                                                                                                                                                                                                                                                                                                                                                                                                                                                                                                                                                                                                                                                                                                                                                                                                                                                                                                                                                                                                                                                                                                                                                                               |                                                                                                 |                                                                                                  |                                                                                                                                                                                                                                                                                                                              |
| EPI_ISL_6591686, EPI_ISL_6591817                                                                                                                                                                                                                                                                                                                                                                                                                                                                                                                                                                                                                                                                                                                                                                                                                                                                                                                                                                                                                                                                                                                                                                                                                                                                                                                                                                                                                                                                                                                                                                                                                                                                                                                                                                                                                        | HOSPITAL DR. TOMAS CASAS CASAJUS                                                                | Incienza, Instituto Costarricense de Investigación y Enseñanza en Nutrición y Salud              | Adriana Godínez; Claudio Soto-Garita; Estela Cordero; Francisco Duarte; Hebleen Porras; José Luis Vargas; Mariela Gutiérrez; Melany Calderón; Sofia Herrera & Hernando Vargas Vargas                                                                                                                                         |
| see above                                                                                                                                                                                                                                                                                                                                                                                                                                                                                                                                                                                                                                                                                                                                                                                                                                                                                                                                                                                                                                                                                                                                                                                                                                                                                                                                                                                                                                                                                                                                                                                                                                                                                                                                                                                                                                               |                                                                                                 |                                                                                                  |                                                                                                                                                                                                                                                                                                                              |
| EPI_ISL_6591616                                                                                                                                                                                                                                                                                                                                                                                                                                                                                                                                                                                                                                                                                                                                                                                                                                                                                                                                                                                                                                                                                                                                                                                                                                                                                                                                                                                                                                                                                                                                                                                                                                                                                                                                                                                                                                         | HOSPITAL DR. TONY FACIO CASTRO                                                                  | Incienza, Instituto Costarricense de Investigación y Enseñanza en Nutrición y Salud              | Adriana Godínez; Claudio Soto-Garita; Estela Cordero; Francisco Duarte; Hebleen Porras; José Luis Vargas; Mariela Gutiérrez; Melany Calderón; Sofia Herrera & Marcela Rodríguez Gómez                                                                                                                                        |
| see above                                                                                                                                                                                                                                                                                                                                                                                                                                                                                                                                                                                                                                                                                                                                                                                                                                                                                                                                                                                                                                                                                                                                                                                                                                                                                                                                                                                                                                                                                                                                                                                                                                                                                                                                                                                                                                               |                                                                                                 |                                                                                                  |                                                                                                                                                                                                                                                                                                                              |
| EPI_ISL_6591698                                                                                                                                                                                                                                                                                                                                                                                                                                                                                                                                                                                                                                                                                                                                                                                                                                                                                                                                                                                                                                                                                                                                                                                                                                                                                                                                                                                                                                                                                                                                                                                                                                                                                                                                                                                                                                         | HOSPITAL GOLFITO MANUEL MORA VALVERDE                                                           | Incienza, Instituto Costarricense de Investigación y Enseñanza en Nutrición y Salud              | Adriana Godínez; Claudio Soto-Garita; Estela Cordero; Francisco Duarte; Hebleen Porras; José Luis Vargas; Mariela Gutiérrez; Melany Calderón; Sofia Herrera & José Mora Bogantes                                                                                                                                             |
| see above                                                                                                                                                                                                                                                                                                                                                                                                                                                                                                                                                                                                                                                                                                                                                                                                                                                                                                                                                                                                                                                                                                                                                                                                                                                                                                                                                                                                                                                                                                                                                                                                                                                                                                                                                                                                                                               |                                                                                                 |                                                                                                  |                                                                                                                                                                                                                                                                                                                              |
| EPI_ISL_6591620, EPI_ISL_6591624, EPI_ISL_6591649, EPI_ISL_6591656, EPI_ISL_6591834, EPI_ISL_6591848                                                                                                                                                                                                                                                                                                                                                                                                                                                                                                                                                                                                                                                                                                                                                                                                                                                                                                                                                                                                                                                                                                                                                                                                                                                                                                                                                                                                                                                                                                                                                                                                                                                                                                                                                    | HOSPITAL GUAPILES                                                                               | Incienza, Instituto Costarricense de Investigación y Enseñanza en Nutrición y Salud              | Adriana Godínez; Claudio Soto-Garita; Estela Cordero; Francisco Duarte; Hebleen Porras; José Luis Vargas; Mariela Gutiérrez; Melany Calderón; Sofia Herrera & Cesar Cerdas Quesada; Sofia Herrera & César Cerdas Quesada                                                                                                     |
| see above                                                                                                                                                                                                                                                                                                                                                                                                                                                                                                                                                                                                                                                                                                                                                                                                                                                                                                                                                                                                                                                                                                                                                                                                                                                                                                                                                                                                                                                                                                                                                                                                                                                                                                                                                                                                                                               |                                                                                                 |                                                                                                  |                                                                                                                                                                                                                                                                                                                              |
| EPI_ISL_6591479                                                                                                                                                                                                                                                                                                                                                                                                                                                                                                                                                                                                                                                                                                                                                                                                                                                                                                                                                                                                                                                                                                                                                                                                                                                                                                                                                                                                                                                                                                                                                                                                                                                                                                                                                                                                                                         | HOSPITAL LA ANEXION                                                                             | Incienza, Instituto Costarricense de Investigación y Enseñanza en Nutrición y Salud              | Adriana Godínez; Claudio Soto-Garita; Estela Cordero; Francisco Duarte; Hebleen Porras; José Luis Vargas; Mariela Gutiérrez; Melany Calderón; Sofia Herrera & Arnoldo Zamora                                                                                                                                                 |
| see above                                                                                                                                                                                                                                                                                                                                                                                                                                                                                                                                                                                                                                                                                                                                                                                                                                                                                                                                                                                                                                                                                                                                                                                                                                                                                                                                                                                                                                                                                                                                                                                                                                                                                                                                                                                                                                               |                                                                                                 |                                                                                                  |                                                                                                                                                                                                                                                                                                                              |
| EPI_ISL_6594136                                                                                                                                                                                                                                                                                                                                                                                                                                                                                                                                                                                                                                                                                                                                                                                                                                                                                                                                                                                                                                                                                                                                                                                                                                                                                                                                                                                                                                                                                                                                                                                                                                                                                                                                                                                                                                         | HOSPITAL MATEU ORFILA                                                                           | HOSPITAL UNIVERSITARIO SON ESPASES                                                               | Dr. Antonio Oliver; Dr. Carla López-Causapé; Dr. Gabriel Cabot; Hospital Universitario Son Espases; on behalf of Servicio de Microbiología                                                                                                                                                                                   |
| see above                                                                                                                                                                                                                                                                                                                                                                                                                                                                                                                                                                                                                                                                                                                                                                                                                                                                                                                                                                                                                                                                                                                                                                                                                                                                                                                                                                                                                                                                                                                                                                                                                                                                                                                                                                                                                                               |                                                                                                 |                                                                                                  |                                                                                                                                                                                                                                                                                                                              |
| EPI_ISL_6591804                                                                                                                                                                                                                                                                                                                                                                                                                                                                                                                                                                                                                                                                                                                                                                                                                                                                                                                                                                                                                                                                                                                                                                                                                                                                                                                                                                                                                                                                                                                                                                                                                                                                                                                                                                                                                                         | HOSPITAL METROPOLITANO                                                                          | Incienza, Instituto Costarricense de Investigación y Enseñanza en Nutrición y Salud              | Adriana Godínez; Claudio Soto-Garita; Estela Cordero; Francisco Duarte; Hebleen Porras; José Luis Vargas; Mariela Gutiérrez & Sofia Herrera; Melany Calderón                                                                                                                                                                 |
| see above                                                                                                                                                                                                                                                                                                                                                                                                                                                                                                                                                                                                                                                                                                                                                                                                                                                                                                                                                                                                                                                                                                                                                                                                                                                                                                                                                                                                                                                                                                                                                                                                                                                                                                                                                                                                                                               |                                                                                                 |                                                                                                  |                                                                                                                                                                                                                                                                                                                              |
| EPI_ISL_6591343, EPI_ISL_6591393                                                                                                                                                                                                                                                                                                                                                                                                                                                                                                                                                                                                                                                                                                                                                                                                                                                                                                                                                                                                                                                                                                                                                                                                                                                                                                                                                                                                                                                                                                                                                                                                                                                                                                                                                                                                                        | HOSPITAL SAN FRANCISCO DE ASIS                                                                  | Incienza, Instituto Costarricense de Investigación y Enseñanza en Nutrición y Salud              | Adriana Godínez; Claudio Soto-Garita; Estela Cordero; Francisco Duarte; Hebleen Porras; José Luis Vargas; Mariela Gutiérrez; Melany Calderón; Sofia Herrera & Sindy Alfaro                                                                                                                                                   |
| see above                                                                                                                                                                                                                                                                                                                                                                                                                                                                                                                                                                                                                                                                                                                                                                                                                                                                                                                                                                                                                                                                                                                                                                                                                                                                                                                                                                                                                                                                                                                                                                                                                                                                                                                                                                                                                                               |                                                                                                 |                                                                                                  |                                                                                                                                                                                                                                                                                                                              |
| EPI_ISL_6591372, EPI_ISL_6591379, EPI_ISL_6591385                                                                                                                                                                                                                                                                                                                                                                                                                                                                                                                                                                                                                                                                                                                                                                                                                                                                                                                                                                                                                                                                                                                                                                                                                                                                                                                                                                                                                                                                                                                                                                                                                                                                                                                                                                                                       | HOSPITAL SAN RAFAEL DE ALAJUELA                                                                 | Incienza, Instituto Costarricense de Investigación y Enseñanza en Nutrición y Salud              | Adriana Godínez; Claudio Soto-Garita; Estela Cordero; Francisco Duarte; Hebleen Porras; José Luis Vargas; Mariela Gutiérrez; Melany Calderón; Sofia Herrera & Christian Sánchez Solorzano                                                                                                                                    |
| see above                                                                                                                                                                                                                                                                                                                                                                                                                                                                                                                                                                                                                                                                                                                                                                                                                                                                                                                                                                                                                                                                                                                                                                                                                                                                                                                                                                                                                                                                                                                                                                                                                                                                                                                                                                                                                                               |                                                                                                 |                                                                                                  |                                                                                                                                                                                                                                                                                                                              |
| EPI_ISL_6591525, EPI_ISL_6591530, EPI_ISL_6591534                                                                                                                                                                                                                                                                                                                                                                                                                                                                                                                                                                                                                                                                                                                                                                                                                                                                                                                                                                                                                                                                                                                                                                                                                                                                                                                                                                                                                                                                                                                                                                                                                                                                                                                                                                                                       | HOSPITAL SAN VICENTE DE PAUL                                                                    | Incienza, Instituto Costarricense de Investigación y Enseñanza en Nutrición y Salud              | Adriana Godínez; Claudio Soto-Garita; Estela Cordero; Francisco Duarte; Hebleen Porras; José Luis Vargas; Mariela Gutiérrez; Melany Calderón; Sofia Herrera & María Fernanda Sosa Jiménez                                                                                                                                    |
| see above                                                                                                                                                                                                                                                                                                                                                                                                                                                                                                                                                                                                                                                                                                                                                                                                                                                                                                                                                                                                                                                                                                                                                                                                                                                                                                                                                                                                                                                                                                                                                                                                                                                                                                                                                                                                                                               |                                                                                                 |                                                                                                  |                                                                                                                                                                                                                                                                                                                              |
| EPI_ISL_6591677, EPI_ISL_6591682                                                                                                                                                                                                                                                                                                                                                                                                                                                                                                                                                                                                                                                                                                                                                                                                                                                                                                                                                                                                                                                                                                                                                                                                                                                                                                                                                                                                                                                                                                                                                                                                                                                                                                                                                                                                                        | HOSPITAL SAN VITO DE COTO BRUS                                                                  | Incienza, Instituto Costarricense de Investigación y Enseñanza en Nutrición y Salud              | Adriana Godínez; Claudio Soto-Garita; Estela Cordero; Francisco Duarte; Hebleen Porras; José Luis Vargas; Mariela Gutiérrez & Sofia Herrera; Melany Calderón                                                                                                                                                                 |
| see above                                                                                                                                                                                                                                                                                                                                                                                                                                                                                                                                                                                                                                                                                                                                                                                                                                                                                                                                                                                                                                                                                                                                                                                                                                                                                                                                                                                                                                                                                                                                                                                                                                                                                                                                                                                                                                               |                                                                                                 |                                                                                                  |                                                                                                                                                                                                                                                                                                                              |
| EPI_ISL_6596003, EPI_ISL_6596004, EPI_ISL_6596005, EPI_ISL_6596006, EPI_ISL_6596007, EPI_ISL_6596008, EPI_ISL_6596009, EPI_ISL_6596012, EPI_ISL_6596013, EPI_ISL_6596014, EPI_ISL_6596015, EPI_ISL_6596016, EPI_ISL_6596017, EPI_ISL_6596018, EPI_ISL_6596019, EPI_ISL_6596020, EPI_ISL_6596021, EPI_ISL_6596022                                                                                                                                                                                                                                                                                                                                                                                                                                                                                                                                                                                                                                                                                                                                                                                                                                                                                                                                                                                                                                                                                                                                                                                                                                                                                                                                                                                                                                                                                                                                        | HOSPITAL UNIVERSITARIO 12 DE OCTUBRE                                                            | HOSPITAL UNIVERSITARIO 12 DE OCTUBRE                                                             | Carmen Martín-Higuera; Esther Viedma; Irene Muñoz-Gallego; M.ª Dolores Folgueira; Mar Aguilera; Noelia Moral; Rafael Delgado; Sagrario Zurita                                                                                                                                                                                |
| see above                                                                                                                                                                                                                                                                                                                                                                                                                                                                                                                                                                                                                                                                                                                                                                                                                                                                                                                                                                                                                                                                                                                                                                                                                                                                                                                                                                                                                                                                                                                                                                                                                                                                                                                                                                                                                                               |                                                                                                 |                                                                                                  |                                                                                                                                                                                                                                                                                                                              |

|                                                                                                                                                                                                                                                                                                                                                                                                                                                                                                                                                                                                                                                                                                                                                                                                                                                                                                                                                                                                                                                                                                                                                                                                                                                                                                                                                                                                                                                                                                                                                                                                                                                                                                                                                                                                                                                                                                                                                                                                                                                                                                                                                                                                                                                                                                                                                                                                                                                                                                                                                                                                                                                                                                                                                                                                                                                                                                                                                                                                                                                                                                                                                                                                                                                                                                                                                                                                                                                                                                                                                                                                                                                                                                                                                                                                                                                                                                                                                                                                                                                                                                                                                                                                                                                                                                                                                                                                                                                                                                                                                                                                                                                                                                                                                                                                                                                                                                                                                                                                                                                                                                                                                                                                                                                                                                                                                                                                                                                                                                                                                                           |           |                                                                         |                                                                                                                                                                                                                                                                                                                                                                                                                                      |                                                                                                                                                              |
|---------------------------------------------------------------------------------------------------------------------------------------------------------------------------------------------------------------------------------------------------------------------------------------------------------------------------------------------------------------------------------------------------------------------------------------------------------------------------------------------------------------------------------------------------------------------------------------------------------------------------------------------------------------------------------------------------------------------------------------------------------------------------------------------------------------------------------------------------------------------------------------------------------------------------------------------------------------------------------------------------------------------------------------------------------------------------------------------------------------------------------------------------------------------------------------------------------------------------------------------------------------------------------------------------------------------------------------------------------------------------------------------------------------------------------------------------------------------------------------------------------------------------------------------------------------------------------------------------------------------------------------------------------------------------------------------------------------------------------------------------------------------------------------------------------------------------------------------------------------------------------------------------------------------------------------------------------------------------------------------------------------------------------------------------------------------------------------------------------------------------------------------------------------------------------------------------------------------------------------------------------------------------------------------------------------------------------------------------------------------------------------------------------------------------------------------------------------------------------------------------------------------------------------------------------------------------------------------------------------------------------------------------------------------------------------------------------------------------------------------------------------------------------------------------------------------------------------------------------------------------------------------------------------------------------------------------------------------------------------------------------------------------------------------------------------------------------------------------------------------------------------------------------------------------------------------------------------------------------------------------------------------------------------------------------------------------------------------------------------------------------------------------------------------------------------------------------------------------------------------------------------------------------------------------------------------------------------------------------------------------------------------------------------------------------------------------------------------------------------------------------------------------------------------------------------------------------------------------------------------------------------------------------------------------------------------------------------------------------------------------------------------------------------------------------------------------------------------------------------------------------------------------------------------------------------------------------------------------------------------------------------------------------------------------------------------------------------------------------------------------------------------------------------------------------------------------------------------------------------------------------------------------------------------------------------------------------------------------------------------------------------------------------------------------------------------------------------------------------------------------------------------------------------------------------------------------------------------------------------------------------------------------------------------------------------------------------------------------------------------------------------------------------------------------------------------------------------------------------------------------------------------------------------------------------------------------------------------------------------------------------------------------------------------------------------------------------------------------------------------------------------------------------------------------------------------------------------------------------------------------------------------------------------------------------------------------|-----------|-------------------------------------------------------------------------|--------------------------------------------------------------------------------------------------------------------------------------------------------------------------------------------------------------------------------------------------------------------------------------------------------------------------------------------------------------------------------------------------------------------------------------|--------------------------------------------------------------------------------------------------------------------------------------------------------------|
| EPI_ISL_6594118, EPI_ISL_6594119, EPI_ISL_6594123, EPI_ISL_6594124, EPI_ISL_6594125, EPI_ISL_6594126, EPI_ISL_6594127, EPI_ISL_6594128, EPI_ISL_6594129, EPI_ISL_6594131, EPI_ISL_6594132, EPI_ISL_6594133, EPI_ISL_6594134, EPI_ISL_6594135, EPI_ISL_6594136, EPI_ISL_6594137, EPI_ISL_6594138, EPI_ISL_6594139, EPI_ISL_6594140, EPI_ISL_6594141, EPI_ISL_6594142, EPI_ISL_6594143, EPI_ISL_6594144, EPI_ISL_6594145, EPI_ISL_6594146, EPI_ISL_6594147, EPI_ISL_6594148, EPI_ISL_6594149, EPI_ISL_6594150, EPI_ISL_6594151, EPI_ISL_6594152, EPI_ISL_6594153, EPI_ISL_6594154, EPI_ISL_6594155, EPI_ISL_6594156, EPI_ISL_6594157, EPI_ISL_6594158, EPI_ISL_6594159, EPI_ISL_6594160, EPI_ISL_6594161, EPI_ISL_6594162, EPI_ISL_6594163, EPI_ISL_6594164, EPI_ISL_6594165, EPI_ISL_6594166, EPI_ISL_6594167, EPI_ISL_6594168, EPI_ISL_6594169, EPI_ISL_6594170, EPI_ISL_6594171, EPI_ISL_6594172, EPI_ISL_6594173, EPI_ISL_6594174, EPI_ISL_6594175, EPI_ISL_6594176, EPI_ISL_6594177, EPI_ISL_6594178, EPI_ISL_6594179, EPI_ISL_6594180, EPI_ISL_6594181, EPI_ISL_6594182, EPI_ISL_6594183, EPI_ISL_6594184, EPI_ISL_6594185, EPI_ISL_6594186, EPI_ISL_6594187, EPI_ISL_6594188, EPI_ISL_6594189, EPI_ISL_6594190, EPI_ISL_6594191, EPI_ISL_6594192, EPI_ISL_6594193                                                                                                                                                                                                                                                                                                                                                                                                                                                                                                                                                                                                                                                                                                                                                                                                                                                                                                                                                                                                                                                                                                                                                                                                                                                                                                                                                                                                                                                                                                                                                                                                                                                                                                                                                                                                                                                                                                                                                                                                                                                                                                                                                                                                                                                                                                                                                                                                                                                                                                                                                                                                                                                                                                                                                                                                                                                                                                                                                                                                                                                                                                                                                                                                                                                                                                                                                                                                                                                                                                                                                                                                                                                                                                                                                                                                                                                                                                                                                                                                                                                                                                                                                                                                                                                                                                    | see above | HOSPITAL UNIVERSITARIO SON ESPASES                                      | HOSPITAL UNIVERSITARIO SON ESPASES                                                                                                                                                                                                                                                                                                                                                                                                   | Dr. Antonio Oliver; Dr. Carla López-Causapé; Dr. Gabriel Cabot; Hospital Universitario Son Espases; on behalf of Servicio de Microbiología                   |
| EPI_ISL_6594122, EPI_ISL_6594130, EPI_ISL_6594137, EPI_ISL_6594146, EPI_ISL_6594157, EPI_ISL_6594166                                                                                                                                                                                                                                                                                                                                                                                                                                                                                                                                                                                                                                                                                                                                                                                                                                                                                                                                                                                                                                                                                                                                                                                                                                                                                                                                                                                                                                                                                                                                                                                                                                                                                                                                                                                                                                                                                                                                                                                                                                                                                                                                                                                                                                                                                                                                                                                                                                                                                                                                                                                                                                                                                                                                                                                                                                                                                                                                                                                                                                                                                                                                                                                                                                                                                                                                                                                                                                                                                                                                                                                                                                                                                                                                                                                                                                                                                                                                                                                                                                                                                                                                                                                                                                                                                                                                                                                                                                                                                                                                                                                                                                                                                                                                                                                                                                                                                                                                                                                                                                                                                                                                                                                                                                                                                                                                                                                                                                                                      | see above | HOSPITAL UNIVERSITARIO SON LLATZER                                      | HOSPITAL UNIVERSITARIO SON ESPASES                                                                                                                                                                                                                                                                                                                                                                                                   | Dr. Antonio Oliver; Dr. Carla López-Causapé; Dr. Gabriel Cabot; Hospital Universitario Son Espases; on behalf of Servicio de Microbiología                   |
| EPI_ISL_6592596, EPI_ISL_6592610, EPI_ISL_6592616, EPI_ISL_6592626, EPI_ISL_6592630, EPI_ISL_6592636, EPI_ISL_6592639, EPI_ISL_6592659, EPI_ISL_6592669, EPI_ISL_6592670, EPI_ISL_6592673, EPI_ISL_6592676, EPI_ISL_6592682, EPI_ISL_6592691, EPI_ISL_6592702, EPI_ISL_6592706, EPI_ISL_6592712, EPI_ISL_6592720, EPI_ISL_6592721, EPI_ISL_6592722, EPI_ISL_6592723, EPI_ISL_6592735, EPI_ISL_6592759, EPI_ISL_6592774, EPI_ISL_6592778, EPI_ISL_6592781, EPI_ISL_6592784, EPI_ISL_6592789, EPI_ISL_6592790, EPI_ISL_6592796, EPI_ISL_6592798, EPI_ISL_6592803, EPI_ISL_6592810, EPI_ISL_6592823, EPI_ISL_6592832, EPI_ISL_6592838, EPI_ISL_6592839, EPI_ISL_6592842, EPI_ISL_6592844, EPI_ISL_6592850, EPI_ISL_6592857, EPI_ISL_6592862, EPI_ISL_6592870, EPI_ISL_6592873, EPI_ISL_6592877, EPI_ISL_6592888, EPI_ISL_6592891, EPI_ISL_6592900                                                                                                                                                                                                                                                                                                                                                                                                                                                                                                                                                                                                                                                                                                                                                                                                                                                                                                                                                                                                                                                                                                                                                                                                                                                                                                                                                                                                                                                                                                                                                                                                                                                                                                                                                                                                                                                                                                                                                                                                                                                                                                                                                                                                                                                                                                                                                                                                                                                                                                                                                                                                                                                                                                                                                                                                                                                                                                                                                                                                                                                                                                                                                                                                                                                                                                                                                                                                                                                                                                                                                                                                                                                                                                                                                                                                                                                                                                                                                                                                                                                                                                                                                                                                                                                                                                                                                                                                                                                                                                                                                                                                                                                                                                                            | see above | Health Services Laboratories                                            | Wellcome Sanger Institute for the COVID-19 Genomics UK (COG-UK) Consortium<br>Cordelia Langford; David K. Jackson; Dominic Kwiatkowski; Ewan Harrison; Health Services Laboratories and Alex Alderton; Ian Johnston; Jeffrey Barrett; John Sillitoe on behalf of the Wellcome Sanger Institute COVID-19 Surveillance Team; Roberto Amato; Sonia Gonçalves                                                                            |                                                                                                                                                              |
| EPI_ISL_6585798, EPI_ISL_6586003, EPI_ISL_6586010, EPI_ISL_6586012, EPI_ISL_6586016, EPI_ISL_6586021, EPI_ISL_6586022, EPI_ISL_6586023, EPI_ISL_6586025, EPI_ISL_6586027, EPI_ISL_6586028, EPI_ISL_6586029, EPI_ISL_6586033, EPI_ISL_6586034, EPI_ISL_6586035, EPI_ISL_6586036, EPI_ISL_6586037, EPI_ISL_6586038, EPI_ISL_6586039, EPI_ISL_6586040, EPI_ISL_6586041, EPI_ISL_6586042, EPI_ISL_6586043, EPI_ISL_6586044, EPI_ISL_6586045, EPI_ISL_6586046, EPI_ISL_6586047, EPI_ISL_6586048, EPI_ISL_6586049, EPI_ISL_6586050, EPI_ISL_6586051, EPI_ISL_6586052, EPI_ISL_6586053, EPI_ISL_6586054, EPI_ISL_6586055, EPI_ISL_6586056, EPI_ISL_6586057, EPI_ISL_6586058, EPI_ISL_6586059, EPI_ISL_6586060, EPI_ISL_6586061, EPI_ISL_6586062, EPI_ISL_6586063, EPI_ISL_6586064, EPI_ISL_6586065, EPI_ISL_6586066, EPI_ISL_6586067, EPI_ISL_6586068, EPI_ISL_6586069, EPI_ISL_6586070, EPI_ISL_6586071, EPI_ISL_6586072, EPI_ISL_6586073, EPI_ISL_6586074, EPI_ISL_6586075, EPI_ISL_6586076, EPI_ISL_6586077, EPI_ISL_6586078, EPI_ISL_6586079, EPI_ISL_6586080, EPI_ISL_6586081, EPI_ISL_6586082, EPI_ISL_6586083, EPI_ISL_6586084, EPI_ISL_6586085, EPI_ISL_6586086, EPI_ISL_6586087, EPI_ISL_6586088, EPI_ISL_6586089, EPI_ISL_6586090, EPI_ISL_6586091, EPI_ISL_6586092, EPI_ISL_6586093, EPI_ISL_6586094, EPI_ISL_6586095, EPI_ISL_6586096, EPI_ISL_6586097, EPI_ISL_6586098, EPI_ISL_6586099, EPI_ISL_6586100, EPI_ISL_6586101, EPI_ISL_6586102, EPI_ISL_6586103, EPI_ISL_6586104, EPI_ISL_6586105, EPI_ISL_6586106, EPI_ISL_6586107, EPI_ISL_6586108, EPI_ISL_6586109, EPI_ISL_6586110, EPI_ISL_6586111, EPI_ISL_6586112, EPI_ISL_6586113, EPI_ISL_6586114, EPI_ISL_6586115, EPI_ISL_6586116, EPI_ISL_6586117, EPI_ISL_6586118, EPI_ISL_6586119, EPI_ISL_6586120, EPI_ISL_6586121, EPI_ISL_6586122, EPI_ISL_6586123, EPI_ISL_6586124, EPI_ISL_6586125, EPI_ISL_6586126, EPI_ISL_6586127, EPI_ISL_6586128, EPI_ISL_6586129, EPI_ISL_6586130, EPI_ISL_6586131, EPI_ISL_6586132, EPI_ISL_6586133, EPI_ISL_6586134, EPI_ISL_6586135, EPI_ISL_6586136, EPI_ISL_6586137, EPI_ISL_6586138, EPI_ISL_6586139, EPI_ISL_6586140, EPI_ISL_6586141, EPI_ISL_6586142, EPI_ISL_6586143, EPI_ISL_6586144, EPI_ISL_6586145, EPI_ISL_6586146, EPI_ISL_6586147, EPI_ISL_6586148, EPI_ISL_6586149, EPI_ISL_6586150, EPI_ISL_6586151, EPI_ISL_6586152, EPI_ISL_6586153, EPI_ISL_6586154, EPI_ISL_6586155, EPI_ISL_6586156, EPI_ISL_6586157, EPI_ISL_6586158, EPI_ISL_6586159, EPI_ISL_6586160, EPI_ISL_6586161, EPI_ISL_6586162, EPI_ISL_6586163, EPI_ISL_6586164, EPI_ISL_6586165, EPI_ISL_6586166, EPI_ISL_6586167, EPI_ISL_6586168, EPI_ISL_6586169, EPI_ISL_6586170, EPI_ISL_6586171, EPI_ISL_6586172, EPI_ISL_6586173, EPI_ISL_6586174, EPI_ISL_6586175, EPI_ISL_6586176, EPI_ISL_6586177, EPI_ISL_6586178, EPI_ISL_6586179, EPI_ISL_6586180, EPI_ISL_6586181, EPI_ISL_6586182, EPI_ISL_6586183, EPI_ISL_6586184, EPI_ISL_6586185, EPI_ISL_6586186, EPI_ISL_6586187, EPI_ISL_6586188, EPI_ISL_6586189, EPI_ISL_6586190, EPI_ISL_6586191, EPI_ISL_6586192, EPI_ISL_6586193, EPI_ISL_6586194, EPI_ISL_6586195, EPI_ISL_6586196, EPI_ISL_6586197, EPI_ISL_6586198, EPI_ISL_6586199, EPI_ISL_6586200, EPI_ISL_6586201, EPI_ISL_6586202, EPI_ISL_6586203, EPI_ISL_6586204, EPI_ISL_6586205, EPI_ISL_6586206, EPI_ISL_6586207, EPI_ISL_6586208, EPI_ISL_6586209, EPI_ISL_6586210, EPI_ISL_6586211, EPI_ISL_6586212, EPI_ISL_6586213, EPI_ISL_6586214, EPI_ISL_6586215, EPI_ISL_6586216, EPI_ISL_6586217, EPI_ISL_6586218, EPI_ISL_6586219, EPI_ISL_6586220, EPI_ISL_6586221, EPI_ISL_6586222, EPI_ISL_6586223, EPI_ISL_6586224, EPI_ISL_6586225, EPI_ISL_6586226, EPI_ISL_6586227, EPI_ISL_6586228, EPI_ISL_6586229, EPI_ISL_6586230, EPI_ISL_6586231, EPI_ISL_6586232, EPI_ISL_6586233, EPI_ISL_6586234, EPI_ISL_6586235, EPI_ISL_6586236                                                                                                                                                                                                                                                                                                                                                                                                                                                                                                                                                                                                                                                                                                                                                                                                                                                                                                                                                                                                                                                                                                                                                                                                                                                                                                                                                                                                                                                                                                                                                                                                                                                                                                                                                    | see above | Histopath                                                               | NSW Health Pathology - Institute of Clinical Pathology and Medical Research; Westmead Hospital; University of Sydney<br>Arnott A.; Draper J.; Gall M.; Martinez E.; Rockett R.; Sintchenko V.; on behalf of ICPMR                                                                                                                                                                                                                    |                                                                                                                                                              |
| EPI_ISL_6595061, EPI_ISL_6595062, EPI_ISL_6595063, EPI_ISL_6595079, EPI_ISL_6595080, EPI_ISL_6595083, EPI_ISL_6595084, EPI_ISL_6595085, EPI_ISL_6595086, EPI_ISL_6595087, EPI_ISL_6595088, EPI_ISL_6595089, EPI_ISL_6595137, EPI_ISL_6595146, EPI_ISL_6595161                                                                                                                                                                                                                                                                                                                                                                                                                                                                                                                                                                                                                                                                                                                                                                                                                                                                                                                                                                                                                                                                                                                                                                                                                                                                                                                                                                                                                                                                                                                                                                                                                                                                                                                                                                                                                                                                                                                                                                                                                                                                                                                                                                                                                                                                                                                                                                                                                                                                                                                                                                                                                                                                                                                                                                                                                                                                                                                                                                                                                                                                                                                                                                                                                                                                                                                                                                                                                                                                                                                                                                                                                                                                                                                                                                                                                                                                                                                                                                                                                                                                                                                                                                                                                                                                                                                                                                                                                                                                                                                                                                                                                                                                                                                                                                                                                                                                                                                                                                                                                                                                                                                                                                                                                                                                                                             | see above | Hospital                                                                | National Reference Center for Viruses of Respiratory Infections, Institut Pasteur, Paris<br>Angela Brisebarre; Axelle Paquin; Camille Capel; Christophe Malabat; Chrystel Leroy; Corinne Maufrais; Céline Bressollette; Etienne Simon-Lorière; Frédéric Lemoine; Julien Fumey; Louise Lefrançois; Marianne Burgard; Marion Barbet; Maud Vanpeene; Méline Bizard; Slim El Khiair; Sylvie Behillil; Sylvie Van der Werf; Vincent Enouf |                                                                                                                                                              |
| EPI_ISL_6593376, EPI_ISL_6593386, EPI_ISL_6593391, EPI_ISL_6593401, EPI_ISL_6593408, EPI_ISL_6593418, EPI_ISL_6593426, EPI_ISL_6593435, EPI_ISL_6593440, EPI_ISL_6593444, EPI_ISL_6593455, EPI_ISL_6593458                                                                                                                                                                                                                                                                                                                                                                                                                                                                                                                                                                                                                                                                                                                                                                                                                                                                                                                                                                                                                                                                                                                                                                                                                                                                                                                                                                                                                                                                                                                                                                                                                                                                                                                                                                                                                                                                                                                                                                                                                                                                                                                                                                                                                                                                                                                                                                                                                                                                                                                                                                                                                                                                                                                                                                                                                                                                                                                                                                                                                                                                                                                                                                                                                                                                                                                                                                                                                                                                                                                                                                                                                                                                                                                                                                                                                                                                                                                                                                                                                                                                                                                                                                                                                                                                                                                                                                                                                                                                                                                                                                                                                                                                                                                                                                                                                                                                                                                                                                                                                                                                                                                                                                                                                                                                                                                                                                | see above | Hospital General Universitario de Ciudad Real                           | Hospital General Universitario de Ciudad Real                                                                                                                                                                                                                                                                                                                                                                                        | Cristina Colmenarejo; José Martínez-Alarcón; Lidia García-Agudo; Marta Torres-Narbona; Soledad Illescas Fernández-Bermejo                                    |
| EPI_ISL_6593465, EPI_ISL_6593349, EPI_ISL_6593358, EPI_ISL_6593368                                                                                                                                                                                                                                                                                                                                                                                                                                                                                                                                                                                                                                                                                                                                                                                                                                                                                                                                                                                                                                                                                                                                                                                                                                                                                                                                                                                                                                                                                                                                                                                                                                                                                                                                                                                                                                                                                                                                                                                                                                                                                                                                                                                                                                                                                                                                                                                                                                                                                                                                                                                                                                                                                                                                                                                                                                                                                                                                                                                                                                                                                                                                                                                                                                                                                                                                                                                                                                                                                                                                                                                                                                                                                                                                                                                                                                                                                                                                                                                                                                                                                                                                                                                                                                                                                                                                                                                                                                                                                                                                                                                                                                                                                                                                                                                                                                                                                                                                                                                                                                                                                                                                                                                                                                                                                                                                                                                                                                                                                                        | see above | Hospital General de Tomelloso                                           | Hospital General Universitario de Ciudad Real                                                                                                                                                                                                                                                                                                                                                                                        | Cristina Colmenarejo; José Martínez-Alarcón; Lidia García-Agudo; Marta Torres-Narbona; Soledad Illescas Fernández-Bermejo                                    |
| EPI_ISL_6591945, EPI_ISL_6591953, EPI_ISL_6591959, EPI_ISL_6591965, EPI_ISL_6591971, EPI_ISL_6591975, EPI_ISL_6591982, EPI_ISL_6591987, EPI_ISL_6591990, EPI_ISL_6591997, EPI_ISL_6592002, EPI_ISL_6592012, EPI_ISL_6592018, EPI_ISL_6592024, EPI_ISL_6592031, EPI_ISL_6592037, EPI_ISL_6592041, EPI_ISL_6592046, EPI_ISL_6592053, EPI_ISL_6592061, EPI_ISL_6592064, EPI_ISL_6592074, EPI_ISL_6592083, EPI_ISL_6592090, EPI_ISL_6592101, EPI_ISL_6592110, EPI_ISL_6592116, EPI_ISL_6592125, EPI_ISL_6592135, EPI_ISL_6592140, EPI_ISL_6592146, EPI_ISL_6592150, EPI_ISL_6592159, EPI_ISL_6592164, EPI_ISL_6592172, EPI_ISL_6592177, EPI_ISL_6592255, EPI_ISL_6592255, EPI_ISL_6592268, EPI_ISL_6592279, EPI_ISL_6592284, EPI_ISL_6592285, EPI_ISL_6592302, EPI_ISL_6592309, EPI_ISL_6592316, EPI_ISL_6592321, EPI_ISL_6592328, EPI_ISL_6592335, EPI_ISL_6592341, EPI_ISL_6592346, EPI_ISL_6592389, EPI_ISL_6592393, EPI_ISL_6592402, EPI_ISL_6592410, EPI_ISL_6592417, EPI_ISL_6592426, EPI_ISL_6592437, EPI_ISL_6592442, EPI_ISL_6592445, EPI_ISL_6592454                                                                                                                                                                                                                                                                                                                                                                                                                                                                                                                                                                                                                                                                                                                                                                                                                                                                                                                                                                                                                                                                                                                                                                                                                                                                                                                                                                                                                                                                                                                                                                                                                                                                                                                                                                                                                                                                                                                                                                                                                                                                                                                                                                                                                                                                                                                                                                                                                                                                                                                                                                                                                                                                                                                                                                                                                                                                                                                                                                                                                                                                                                                                                                                                                                                                                                                                                                                                                                                                                                                                                                                                                                                                                                                                                                                                                                                                                                                                                                                                                                                                                                                                                                                                                                                                                                                                                                                                                                                                                                                | see above | Hospital Universitari Vall d'Hebron - Vall d'Hebron Institut de Recerca | Hospital Universitari Vall d'Hebron - Vall d'Hebron Institut de Recerca<br>Alejandra González-Sánchez; Andrés Antón; Ariadna Rando; Carla Castillo; Cristina Andrés; Damir Garcia-Cechic; Josep Quer; Juliana Esperalba; Karen García; María Carmen Martín; María Gema Codina; María Piñana; Rodrigo Vázquez; Tomás Pumarola                                                                                                         |                                                                                                                                                              |
| EPI_ISL_6594619, EPI_ISL_6594621, EPI_ISL_6594624, EPI_ISL_6594626, EPI_ISL_6594627, EPI_ISL_6594628, EPI_ISL_6594629, EPI_ISL_6594630, EPI_ISL_6594632, EPI_ISL_6594633, EPI_ISL_6594635, EPI_ISL_6594636, EPI_ISL_6594638, EPI_ISL_6594639, EPI_ISL_6594640, EPI_ISL_6594641, EPI_ISL_6594642, EPI_ISL_6594643, EPI_ISL_6594644, EPI_ISL_6594645, EPI_ISL_6594646, EPI_ISL_6594647, EPI_ISL_6594650, EPI_ISL_6594651, EPI_ISL_6594652, EPI_ISL_6594653, EPI_ISL_6594654, EPI_ISL_6594655, EPI_ISL_6594656, EPI_ISL_6594659, EPI_ISL_6594660, EPI_ISL_6594661, EPI_ISL_6594662, EPI_ISL_6594663, EPI_ISL_6594664, EPI_ISL_6594665, EPI_ISL_6594666, EPI_ISL_6594667, EPI_ISL_6594668, EPI_ISL_6594669, EPI_ISL_6594670, EPI_ISL_6594671, EPI_ISL_6594672, EPI_ISL_6594673, EPI_ISL_6594674, EPI_ISL_6594675, EPI_ISL_6594676, EPI_ISL_6594677, EPI_ISL_6594678, EPI_ISL_6594679, EPI_ISL_6594680, EPI_ISL_6594681, EPI_ISL_6594682, EPI_ISL_6594683, EPI_ISL_6594684, EPI_ISL_6594685, EPI_ISL_6594686, EPI_ISL_6594687, EPI_ISL_6594688, EPI_ISL_6594689, EPI_ISL_6594690, EPI_ISL_6594691, EPI_ISL_6594692, EPI_ISL_6594693, EPI_ISL_6594694, EPI_ISL_6594695, EPI_ISL_6594696, EPI_ISL_6594697, EPI_ISL_6594698, EPI_ISL_6594699, EPI_ISL_6594700, EPI_ISL_6594701, EPI_ISL_6594702, EPI_ISL_6594703, EPI_ISL_6594704, EPI_ISL_6594705, EPI_ISL_6594706, EPI_ISL_6594707, EPI_ISL_6594708, EPI_ISL_6594709, EPI_ISL_6594710, EPI_ISL_6594711, EPI_ISL_6594712, EPI_ISL_6594713, EPI_ISL_6594714, EPI_ISL_6594715, EPI_ISL_6594716, EPI_ISL_6594717, EPI_ISL_6594718, EPI_ISL_6594719, EPI_ISL_6594720, EPI_ISL_6594721, EPI_ISL_6594722, EPI_ISL_6594723, EPI_ISL_6594724, EPI_ISL_6594725, EPI_ISL_6594726, EPI_ISL_6594727, EPI_ISL_6594728, EPI_ISL_6594729, EPI_ISL_6594730, EPI_ISL_6594731, EPI_ISL_6594732, EPI_ISL_6594733, EPI_ISL_6594734, EPI_ISL_6594735, EPI_ISL_6594736, EPI_ISL_6594737, EPI_ISL_6594738, EPI_ISL_6594739, EPI_ISL_6594740, EPI_ISL_6594741, EPI_ISL_6594742, EPI_ISL_6594743, EPI_ISL_6594744, EPI_ISL_6594745, EPI_ISL_6594746, EPI_ISL_6594747, EPI_ISL_6594748, EPI_ISL_6594749, EPI_ISL_6594750, EPI_ISL_6594751, EPI_ISL_6594752, EPI_ISL_6594753, EPI_ISL_6594754, EPI_ISL_6594755, EPI_ISL_6594756, EPI_ISL_6594757, EPI_ISL_6594758, EPI_ISL_6594759, EPI_ISL_6594760, EPI_ISL_6594761, EPI_ISL_6594762, EPI_ISL_6594763, EPI_ISL_6594764, EPI_ISL_6594765, EPI_ISL_6594766, EPI_ISL_6594767, EPI_ISL_6594768, EPI_ISL_6594769, EPI_ISL_6594770, EPI_ISL_6594771, EPI_ISL_6594772, EPI_ISL_6594773, EPI_ISL_6594774, EPI_ISL_6594775, EPI_ISL_6594776, EPI_ISL_6594777, EPI_ISL_6594778, EPI_ISL_6594779, EPI_ISL_6594780, EPI_ISL_6594781, EPI_ISL_6594782, EPI_ISL_6594783, EPI_ISL_6594784, EPI_ISL_6594785, EPI_ISL_6594786, EPI_ISL_6594787, EPI_ISL_6594788, EPI_ISL_6594789, EPI_ISL_6594790, EPI_ISL_6594791, EPI_ISL_6594792, EPI_ISL_6594793, EPI_ISL_6594794, EPI_ISL_6594795, EPI_ISL_6594796, EPI_ISL_6594797, EPI_ISL_6594798, EPI_ISL_6594799, EPI_ISL_6594800, EPI_ISL_6594801, EPI_ISL_6594802, EPI_ISL_6594803, EPI_ISL_6594804, EPI_ISL_6594805, EPI_ISL_6594806, EPI_ISL_6594807, EPI_ISL_6594808, EPI_ISL_6594809, EPI_ISL_6594810, EPI_ISL_6594811, EPI_ISL_6594812, EPI_ISL_6594813, EPI_ISL_6594814, EPI_ISL_6594815, EPI_ISL_6594816, EPI_ISL_6594817, EPI_ISL_6594818, EPI_ISL_6594819, EPI_ISL_6594820, EPI_ISL_6594821, EPI_ISL_6594822, EPI_ISL_6594823, EPI_ISL_6594824, EPI_ISL_6594825, EPI_ISL_6594826, EPI_ISL_6594827, EPI_ISL_6594828, EPI_ISL_6594829, EPI_ISL_6594830, EPI_ISL_6594831, EPI_ISL_6594832, EPI_ISL_6594833, EPI_ISL_6594834, EPI_ISL_6594835, EPI_ISL_6594836, EPI_ISL_6594837, EPI_ISL_6594838, EPI_ISL_6594839, EPI_ISL_6594840, EPI_ISL_6594841, EPI_ISL_6594842, EPI_ISL_6594843, EPI_ISL_6594844, EPI_ISL_6594845, EPI_ISL_6594846, EPI_ISL_6594847, EPI_ISL_6594848, EPI_ISL_6594849, EPI_ISL_6594850, EPI_ISL_6594851, EPI_ISL_6594852, EPI_ISL_6594853, EPI_ISL_6594854, EPI_ISL_6594855, EPI_ISL_6594856, EPI_ISL_6594857, EPI_ISL_6594858, EPI_ISL_6594859, EPI_ISL_6594860, EPI_ISL_6594861, EPI_ISL_6594862, EPI_ISL_6594863, EPI_ISL_6594864, EPI_ISL_6594865, EPI_ISL_6594866, EPI_ISL_6594867, EPI_ISL_6594868, EPI_ISL_6594869, EPI_ISL_6594870, EPI_ISL_6594871, EPI_ISL_6594872, EPI_ISL_6594873, EPI_ISL_6594874, EPI_ISL_6594875, EPI_ISL_6594876, EPI_ISL_6594877, EPI_ISL_6594878, EPI_ISL_6594879, EPI_ISL_6594880, EPI_ISL_6594881, EPI_ISL_6594882, EPI_ISL_6594883, EPI_ISL_6594884, EPI_ISL_6594885, EPI_ISL_6594886, EPI_ISL_6594887, EPI_ISL_6594888, EPI_ISL_6594889, EPI_ISL_6594890, EPI_ISL_6594891, EPI_ISL_6594892, EPI_ISL_6594893, EPI_ISL_6594894, EPI_ISL_6594895, EPI_ISL_6594896, EPI_ISL_6594897, EPI_ISL_6594898, EPI_ISL_6594899, EPI_ISL_6594900, EPI_ISL_6594901, EPI_ISL_6594902, EPI_ISL_6594903, EPI_ISL_6594904, EPI_ISL_6594905, EPI_ISL_6594906, EPI_ISL_6594907, EPI_ISL_6594908, EPI_ISL_6594909, EPI_ISL_6594910, EPI_ISL_6594911, EPI_ISL_6594912, EPI_ISL_6594913, EPI_ISL_6594914, EPI_ISL_6594915, EPI_ISL_6594916, EPI_ISL_6594917, EPI_ISL_6594918, EPI_ISL_6594919, EPI_ISL_6594920, EPI_ISL_6594921, EPI_ISL_6594922, EPI_ISL_6594923, EPI_ISL_6594924, EPI_ISL_6594925, EPI_ISL_6594926, EPI_ISL_6594927, EPI_ISL_6594928, EPI_ISL_6594929, EPI_ISL_6594930, EPI_ISL_6594931, EPI_ISL_6594932, EPI_ISL_6594933, EPI_ISL_6594934, EPI_ISL_6594935, EPI_ISL_6594936, EPI_ISL_6594937, EPI_ISL_6594938, EPI_ISL_6594939, EPI_ISL_6594940, EPI_ISL_6594941, EPI_ISL_6594942, EPI_ISL_6594943, EPI_ISL_6594944 | see above | Hrvatski zavod za javno zdravstvo                                       | Hrvatski zavod za javno zdravstvo                                                                                                                                                                                                                                                                                                                                                                                                    | Anita Jurić; Dragan Jurić; Irena Tabain; Ivana Ferenčak; Josipa Kuzle                                                                                        |
| EPI_ISL_6600964, EPI_ISL_6600969, EPI_ISL_6591433                                                                                                                                                                                                                                                                                                                                                                                                                                                                                                                                                                                                                                                                                                                                                                                                                                                                                                                                                                                                                                                                                                                                                                                                                                                                                                                                                                                                                                                                                                                                                                                                                                                                                                                                                                                                                                                                                                                                                                                                                                                                                                                                                                                                                                                                                                                                                                                                                                                                                                                                                                                                                                                                                                                                                                                                                                                                                                                                                                                                                                                                                                                                                                                                                                                                                                                                                                                                                                                                                                                                                                                                                                                                                                                                                                                                                                                                                                                                                                                                                                                                                                                                                                                                                                                                                                                                                                                                                                                                                                                                                                                                                                                                                                                                                                                                                                                                                                                                                                                                                                                                                                                                                                                                                                                                                                                                                                                                                                                                                                                         | see above | IN State Department of Health Laboratory Services                       | IN State Department of Health Laboratory Services                                                                                                                                                                                                                                                                                                                                                                                    | Brian Pope; Cassandra Campion; Jamie Yeadon; Kyle Brownlee; Lixia Liu; Mark Glazier; Melissa Hindenlang                                                      |
| EPI_ISL_6591433                                                                                                                                                                                                                                                                                                                                                                                                                                                                                                                                                                                                                                                                                                                                                                                                                                                                                                                                                                                                                                                                                                                                                                                                                                                                                                                                                                                                                                                                                                                                                                                                                                                                                                                                                                                                                                                                                                                                                                                                                                                                                                                                                                                                                                                                                                                                                                                                                                                                                                                                                                                                                                                                                                                                                                                                                                                                                                                                                                                                                                                                                                                                                                                                                                                                                                                                                                                                                                                                                                                                                                                                                                                                                                                                                                                                                                                                                                                                                                                                                                                                                                                                                                                                                                                                                                                                                                                                                                                                                                                                                                                                                                                                                                                                                                                                                                                                                                                                                                                                                                                                                                                                                                                                                                                                                                                                                                                                                                                                                                                                                           | see above | INCIENSA - MEDICINA DE EMPRESA                                          | INCIENSA. Instituto Costarricense de Investigación y Enseñanza en Nutrición y Salud                                                                                                                                                                                                                                                                                                                                                  | Adriana Godínez; Claudio Soto-Garita; Estela Cordero; Francisco Duarte; Hebleen Porras; José Luis Vargas; Mariela Gutiérrez & Sofía Herrera; Melany Calderón |
| EPI_ISL_6584363, EPI_ISL_6584364, EPI_ISL_6584366, EPI_ISL_6584367, EPI_ISL_6584368, EPI_ISL_6584371, EPI_ISL_6584372, EPI_ISL_6584373, EPI_ISL_6584375, EPI_ISL_6584377, EPI_ISL_6584378, EPI_ISL_6584380, EPI_ISL_6584381, EPI_ISL_6584382, EPI_ISL_6584383, EPI_ISL_6584384, EPI_ISL_6584385, EPI_ISL_6584386, EPI_ISL_6584387, EPI_ISL_6584388, EPI_ISL_6584389, EPI_ISL_6584390, EPI_ISL_6584391, EPI_ISL_6584392, EPI_ISL_6584393, EPI_ISL_6584395, EPI_ISL_6584396, EPI_ISL_6584397, EPI_ISL_6584399, EPI_ISL_6584400, EPI_ISL_6584401, EPI_ISL_6584402, EPI_ISL_6584403, EPI_ISL_6584404, EPI_ISL_6584407, EPI_ISL_6584408, EPI_ISL_6584409, EPI_ISL_6584410, EPI_ISL_6584413, EPI_ISL_6584414, EPI_ISL_6584415, EPI_ISL_6584416, EPI_ISL_6584417, EPI_ISL_6584418, EPI_ISL_6584419, EPI_ISL_6584420, EPI_ISL_6584421, EPI_ISL_6584422, EPI_ISL_6584423, EPI_ISL_6584424, EPI_ISL_6584425, EPI_ISL_6584426, EPI_ISL_6584427, EPI_ISL_6584428, EPI_ISL_6584429, EPI_ISL_6584430, EPI_ISL_6584431, EPI_ISL_6584432, EPI_ISL_6584433, EPI_ISL_6584434, EPI_ISL_6584435, EPI_ISL_6584436, EPI_ISL_6584437, EPI_ISL_6584438, EPI_ISL_6584439, EPI_ISL_6584440, EPI_ISL_6584441, EPI_ISL_6584442, EPI_ISL_6584443, EPI_ISL_6584444, EPI_ISL_6584445, EPI_ISL_6584446, EPI_ISL_6584447, EPI_ISL_6584448, EPI_ISL_6584449, EPI_ISL_6584450, EPI_ISL_6584451, EPI_ISL_6584452, EPI_ISL_6584453, EPI_ISL_6584454, EPI_ISL_6584455, EPI_ISL_6584456, EPI_ISL_6584457, EPI_ISL_6584458, EPI_ISL_6584459, EPI_ISL_6584460, EPI_ISL_6584461, EPI_ISL_6584462, EPI_ISL_6584463, EPI_ISL_6584464, EPI_ISL_6584465, EPI_ISL_6584466, EPI_ISL_6584467, EPI_ISL_6584468, EPI_ISL_6584469, EPI_ISL_6584470, EPI_ISL_6584471, EPI_ISL_6584472, EPI_ISL_6584473, EPI_ISL_6584474, EPI_ISL_6584475, EPI_ISL_6584476, EPI_ISL_6584477, EPI_ISL_6584478, EPI_ISL_6584479, EPI_ISL_6584480, EPI_ISL_6584481, EPI_ISL_6584482, EPI_ISL_6584483, EPI_ISL_6584484, EPI_ISL_6584485, EPI_ISL_6584486, EPI_ISL_6584487, EPI_ISL_6584488, EPI_ISL_6584489, EPI_ISL_6584490, EPI_ISL_6584491, EPI_ISL_6584492, EPI_ISL                                                                                                                                                                                                                                                                                                                                                                                                                                                                                                                                                                                                                                                                                                                                                                                                                                                                                                                                                                                                                                                                                                                                                                                                                                                                                                                                                                                                                                                                                                                                                                                                                                                                                                                                                                                                                                                                                                                                                                                                                                                                                                                                                                                                                                                                                                                                                                                                                                                                                                                                                                                                                                                                                                                                                                                                                                                                                                                                                                                                                                                                                                                                                                                                                                                                                                                                                                                                                                                                             |           |                                                                         |                                                                                                                                                                                                                                                                                                                                                                                                                                      |                                                                                                                                                              |



|                                                                                                                                                                                                                                                                                                                                                                                                                                                                                                                                                                                                                                                                                                                                                                                                                                                                                                                                                                                                                                                                                                                                                                                                                                                                                                                                                                                                                                                                                                                                                                                                                                                                                                                                                                                                                                                                                                                                                                                                                                                                                                                                                                                                                                                                                                                                                                                                                                                                                                                                                                                                                                                                                                                                                                                                                                                                                                                                                                                                                                                                                                                                                                                                                                                                                                                                                                                                                                                                                                                                                                                                                                                                                                                                                                                                                                                                                                                                                                                                                                                                                                                                                                                                                                                                                                                                                                                                                                                                                                                                                                                                                                                                                                                                                                                                                                                                                                                                                                                                                                                                                                                                                                                                                                                                                                                                                                                                                                                                                                                                                                                                                                                                                                                                                                                                                                                                                                                                                                                                                                                                                                                                                                                                                                                                                                                                                                                                                                                                                                                                                                                                                                                                                                                                                                                                                                                                                                                                                                                                                                                                                                                                                                                                                                                                                                                                                                                                                                                                                                                                                                                                                                                                                                                                                                                                                                                                                                                                                                                                                                                                                                                                                                                                                                                                                                                                                                                                                                                                                                                                                                                                                                                                                                                                                                                                                                                                                                                                                                                                                                                                                                                                                                                                                                                                                                                                                                                                                                                                                                                                                                                                                                                                                                                                                                                                                                                                                                                                                                                                                                                                                                                                                                                                                                                                                                                                                                                                                                                                                                                                                  |                                                           |                                                                                                                      |                                                                                                                                                                                                                                                                                                                                                                                                                                                                          |                                                                                                                     |
|--------------------------------------------------------------------------------------------------------------------------------------------------------------------------------------------------------------------------------------------------------------------------------------------------------------------------------------------------------------------------------------------------------------------------------------------------------------------------------------------------------------------------------------------------------------------------------------------------------------------------------------------------------------------------------------------------------------------------------------------------------------------------------------------------------------------------------------------------------------------------------------------------------------------------------------------------------------------------------------------------------------------------------------------------------------------------------------------------------------------------------------------------------------------------------------------------------------------------------------------------------------------------------------------------------------------------------------------------------------------------------------------------------------------------------------------------------------------------------------------------------------------------------------------------------------------------------------------------------------------------------------------------------------------------------------------------------------------------------------------------------------------------------------------------------------------------------------------------------------------------------------------------------------------------------------------------------------------------------------------------------------------------------------------------------------------------------------------------------------------------------------------------------------------------------------------------------------------------------------------------------------------------------------------------------------------------------------------------------------------------------------------------------------------------------------------------------------------------------------------------------------------------------------------------------------------------------------------------------------------------------------------------------------------------------------------------------------------------------------------------------------------------------------------------------------------------------------------------------------------------------------------------------------------------------------------------------------------------------------------------------------------------------------------------------------------------------------------------------------------------------------------------------------------------------------------------------------------------------------------------------------------------------------------------------------------------------------------------------------------------------------------------------------------------------------------------------------------------------------------------------------------------------------------------------------------------------------------------------------------------------------------------------------------------------------------------------------------------------------------------------------------------------------------------------------------------------------------------------------------------------------------------------------------------------------------------------------------------------------------------------------------------------------------------------------------------------------------------------------------------------------------------------------------------------------------------------------------------------------------------------------------------------------------------------------------------------------------------------------------------------------------------------------------------------------------------------------------------------------------------------------------------------------------------------------------------------------------------------------------------------------------------------------------------------------------------------------------------------------------------------------------------------------------------------------------------------------------------------------------------------------------------------------------------------------------------------------------------------------------------------------------------------------------------------------------------------------------------------------------------------------------------------------------------------------------------------------------------------------------------------------------------------------------------------------------------------------------------------------------------------------------------------------------------------------------------------------------------------------------------------------------------------------------------------------------------------------------------------------------------------------------------------------------------------------------------------------------------------------------------------------------------------------------------------------------------------------------------------------------------------------------------------------------------------------------------------------------------------------------------------------------------------------------------------------------------------------------------------------------------------------------------------------------------------------------------------------------------------------------------------------------------------------------------------------------------------------------------------------------------------------------------------------------------------------------------------------------------------------------------------------------------------------------------------------------------------------------------------------------------------------------------------------------------------------------------------------------------------------------------------------------------------------------------------------------------------------------------------------------------------------------------------------------------------------------------------------------------------------------------------------------------------------------------------------------------------------------------------------------------------------------------------------------------------------------------------------------------------------------------------------------------------------------------------------------------------------------------------------------------------------------------------------------------------------------------------------------------------------------------------------------------------------------------------------------------------------------------------------------------------------------------------------------------------------------------------------------------------------------------------------------------------------------------------------------------------------------------------------------------------------------------------------------------------------------------------------------------------------------------------------------------------------------------------------------------------------------------------------------------------------------------------------------------------------------------------------------------------------------------------------------------------------------------------------------------------------------------------------------------------------------------------------------------------------------------------------------------------------------------------------------------------------------------------------------------------------------------------------------------------------------------------------------------------------------------------------------------------------------------------------------------------------------------------------------------------------------------------------------------------------------------------------------------------------------------------------------------------------------------------------------------------------------------------------------------------------------------------------------------------------------------------------------------------------------------------------------------------------------------------------------------------------------------------------------------------------------------------------------------------------------------------------------------------------------------------------------------------------------------------------------------------------------------------------------------------------------------------------------------------------------------------------------------------------------------------------------------------------------------------------------------------------------------------------------------------------------------------------------------------------------------------------------------------------------------------------------------------------------------------------------------------------------------------------------------------------------------------------------------------------------------------------------------------------------------------------------------------------------------------------------------------------------------------------------------------------------------------------------------------------------------------------------------------------------------------------------------------------------------------------------------------------------------|-----------------------------------------------------------|----------------------------------------------------------------------------------------------------------------------|--------------------------------------------------------------------------------------------------------------------------------------------------------------------------------------------------------------------------------------------------------------------------------------------------------------------------------------------------------------------------------------------------------------------------------------------------------------------------|---------------------------------------------------------------------------------------------------------------------|
|                                                                                                                                                                                                                                                                                                                                                                                                                                                                                                                                                                                                                                                                                                                                                                                                                                                                                                                                                                                                                                                                                                                                                                                                                                                                                                                                                                                                                                                                                                                                                                                                                                                                                                                                                                                                                                                                                                                                                                                                                                                                                                                                                                                                                                                                                                                                                                                                                                                                                                                                                                                                                                                                                                                                                                                                                                                                                                                                                                                                                                                                                                                                                                                                                                                                                                                                                                                                                                                                                                                                                                                                                                                                                                                                                                                                                                                                                                                                                                                                                                                                                                                                                                                                                                                                                                                                                                                                                                                                                                                                                                                                                                                                                                                                                                                                                                                                                                                                                                                                                                                                                                                                                                                                                                                                                                                                                                                                                                                                                                                                                                                                                                                                                                                                                                                                                                                                                                                                                                                                                                                                                                                                                                                                                                                                                                                                                                                                                                                                                                                                                                                                                                                                                                                                                                                                                                                                                                                                                                                                                                                                                                                                                                                                                                                                                                                                                                                                                                                                                                                                                                                                                                                                                                                                                                                                                                                                                                                                                                                                                                                                                                                                                                                                                                                                                                                                                                                                                                                                                                                                                                                                                                                                                                                                                                                                                                                                                                                                                                                                                                                                                                                                                                                                                                                                                                                                                                                                                                                                                                                                                                                                                                                                                                                                                                                                                                                                                                                                                                                                                                                                                                                                                                                                                                                                                                                                                                                                                                                                                                                                                  |                                                           | (IBiMED), Universidade de Aveiro                                                                                     |                                                                                                                                                                                                                                                                                                                                                                                                                                                                          |                                                                                                                     |
| EPI_ISL_6602672                                                                                                                                                                                                                                                                                                                                                                                                                                                                                                                                                                                                                                                                                                                                                                                                                                                                                                                                                                                                                                                                                                                                                                                                                                                                                                                                                                                                                                                                                                                                                                                                                                                                                                                                                                                                                                                                                                                                                                                                                                                                                                                                                                                                                                                                                                                                                                                                                                                                                                                                                                                                                                                                                                                                                                                                                                                                                                                                                                                                                                                                                                                                                                                                                                                                                                                                                                                                                                                                                                                                                                                                                                                                                                                                                                                                                                                                                                                                                                                                                                                                                                                                                                                                                                                                                                                                                                                                                                                                                                                                                                                                                                                                                                                                                                                                                                                                                                                                                                                                                                                                                                                                                                                                                                                                                                                                                                                                                                                                                                                                                                                                                                                                                                                                                                                                                                                                                                                                                                                                                                                                                                                                                                                                                                                                                                                                                                                                                                                                                                                                                                                                                                                                                                                                                                                                                                                                                                                                                                                                                                                                                                                                                                                                                                                                                                                                                                                                                                                                                                                                                                                                                                                                                                                                                                                                                                                                                                                                                                                                                                                                                                                                                                                                                                                                                                                                                                                                                                                                                                                                                                                                                                                                                                                                                                                                                                                                                                                                                                                                                                                                                                                                                                                                                                                                                                                                                                                                                                                                                                                                                                                                                                                                                                                                                                                                                                                                                                                                                                                                                                                                                                                                                                                                                                                                                                                                                                                                                                                                                                                                  | LESP Guanajuato                                           | Instituto de Diagnostico y Referencia Epidemiologicas (INDRE)                                                        | Abril Rodriguez-Maldonado; Ariadna Medina-Benitez; Claudia Wong-Arambula; Ernesto Ramirez-Gonzalez.; Fernando Gonzalez-Dominguez; Gisela Barrera-Badillo; Irma Lopez-Martinez; Joaquin Quiroz-Mercado; Lucia Hernandez-Rivas; Maribel Gonzalez-Villa; Natividad Cruz-Ortiz; Tatiana Nunez-Garcia; Vanessa Rivero-Arredondo                                                                                                                                               |                                                                                                                     |
| EPI_ISL_6588244, EPI_ISL_6588245, EPI_ISL_6588248, EPI_ISL_6588249, EPI_ISL_6588251, EPI_ISL_6588252, EPI_ISL_6588253, EPI_ISL_6588254, EPI_ISL_6588255, EPI_ISL_6588256, EPI_ISL_6588257, EPI_ISL_6588258                                                                                                                                                                                                                                                                                                                                                                                                                                                                                                                                                                                                                                                                                                                                                                                                                                                                                                                                                                                                                                                                                                                                                                                                                                                                                                                                                                                                                                                                                                                                                                                                                                                                                                                                                                                                                                                                                                                                                                                                                                                                                                                                                                                                                                                                                                                                                                                                                                                                                                                                                                                                                                                                                                                                                                                                                                                                                                                                                                                                                                                                                                                                                                                                                                                                                                                                                                                                                                                                                                                                                                                                                                                                                                                                                                                                                                                                                                                                                                                                                                                                                                                                                                                                                                                                                                                                                                                                                                                                                                                                                                                                                                                                                                                                                                                                                                                                                                                                                                                                                                                                                                                                                                                                                                                                                                                                                                                                                                                                                                                                                                                                                                                                                                                                                                                                                                                                                                                                                                                                                                                                                                                                                                                                                                                                                                                                                                                                                                                                                                                                                                                                                                                                                                                                                                                                                                                                                                                                                                                                                                                                                                                                                                                                                                                                                                                                                                                                                                                                                                                                                                                                                                                                                                                                                                                                                                                                                                                                                                                                                                                                                                                                                                                                                                                                                                                                                                                                                                                                                                                                                                                                                                                                                                                                                                                                                                                                                                                                                                                                                                                                                                                                                                                                                                                                                                                                                                                                                                                                                                                                                                                                                                                                                                                                                                                                                                                                                                                                                                                                                                                                                                                                                                                                                                                                                                                                       |                                                           |                                                                                                                      |                                                                                                                                                                                                                                                                                                                                                                                                                                                                          |                                                                                                                     |
| see above                                                                                                                                                                                                                                                                                                                                                                                                                                                                                                                                                                                                                                                                                                                                                                                                                                                                                                                                                                                                                                                                                                                                                                                                                                                                                                                                                                                                                                                                                                                                                                                                                                                                                                                                                                                                                                                                                                                                                                                                                                                                                                                                                                                                                                                                                                                                                                                                                                                                                                                                                                                                                                                                                                                                                                                                                                                                                                                                                                                                                                                                                                                                                                                                                                                                                                                                                                                                                                                                                                                                                                                                                                                                                                                                                                                                                                                                                                                                                                                                                                                                                                                                                                                                                                                                                                                                                                                                                                                                                                                                                                                                                                                                                                                                                                                                                                                                                                                                                                                                                                                                                                                                                                                                                                                                                                                                                                                                                                                                                                                                                                                                                                                                                                                                                                                                                                                                                                                                                                                                                                                                                                                                                                                                                                                                                                                                                                                                                                                                                                                                                                                                                                                                                                                                                                                                                                                                                                                                                                                                                                                                                                                                                                                                                                                                                                                                                                                                                                                                                                                                                                                                                                                                                                                                                                                                                                                                                                                                                                                                                                                                                                                                                                                                                                                                                                                                                                                                                                                                                                                                                                                                                                                                                                                                                                                                                                                                                                                                                                                                                                                                                                                                                                                                                                                                                                                                                                                                                                                                                                                                                                                                                                                                                                                                                                                                                                                                                                                                                                                                                                                                                                                                                                                                                                                                                                                                                                                                                                                                                                                                        | Labeto - CAB - Leiria                                     | Instituto Nacional de Saude (INSA)                                                                                   |                                                                                                                                                                                                                                                                                                                                                                                                                                                                          | Borges et al                                                                                                        |
| EPI_ISL_6594993, EPI_ISL_6594994, EPI_ISL_6594995, EPI_ISL_6594996, EPI_ISL_6594997, EPI_ISL_6594998, EPI_ISL_6594999, EPI_ISL_6595000, EPI_ISL_6595001, EPI_ISL_6595002, EPI_ISL_6595003, EPI_ISL_6595004, EPI_ISL_6595005, EPI_ISL_6595006, EPI_ISL_6595007, EPI_ISL_6595008, EPI_ISL_6595009, EPI_ISL_6595010, EPI_ISL_6595011, EPI_ISL_6595012, EPI_ISL_6595013, EPI_ISL_6595014, EPI_ISL_6595015, EPI_ISL_6595016, EPI_ISL_6595017, EPI_ISL_6595018, EPI_ISL_6595019, EPI_ISL_6595020, EPI_ISL_6595021, EPI_ISL_6595022, EPI_ISL_6595023, EPI_ISL_6595024, EPI_ISL_6595025, EPI_ISL_6595026, EPI_ISL_6595027, EPI_ISL_6595028, EPI_ISL_6595029, EPI_ISL_6595030, EPI_ISL_6595031, EPI_ISL_6595032, EPI_ISL_6595033, EPI_ISL_6595034, EPI_ISL_6595035, EPI_ISL_6595036, EPI_ISL_6595037, EPI_ISL_6595038, EPI_ISL_6595039, EPI_ISL_6595040, EPI_ISL_6595041, EPI_ISL_6595042, EPI_ISL_6595043, EPI_ISL_6595044, EPI_ISL_6595045, EPI_ISL_6595046, EPI_ISL_6595047, EPI_ISL_6595048, EPI_ISL_6595049, EPI_ISL_6595050, EPI_ISL_6595051, EPI_ISL_6595052, EPI_ISL_6595053, EPI_ISL_6595054, EPI_ISL_6595055, EPI_ISL_6595056, EPI_ISL_6595057, EPI_ISL_6595058, EPI_ISL_6595059, EPI_ISL_6595060, EPI_ISL_6595061, EPI_ISL_6595062, EPI_ISL_6595063, EPI_ISL_6595064, EPI_ISL_6595065, EPI_ISL_6595066, EPI_ISL_6595067, EPI_ISL_6595068, EPI_ISL_6595069, EPI_ISL_6595070, EPI_ISL_6595071, EPI_ISL_6595072, EPI_ISL_6595073, EPI_ISL_6595074, EPI_ISL_6595075, EPI_ISL_6595076, EPI_ISL_6595077, EPI_ISL_6595078, EPI_ISL_6595079, EPI_ISL_6595080, EPI_ISL_6595081, EPI_ISL_6595082, EPI_ISL_6595083, EPI_ISL_6595084, EPI_ISL_6595085, EPI_ISL_6595086, EPI_ISL_6595087, EPI_ISL_6595088, EPI_ISL_6595089, EPI_ISL_6595090, EPI_ISL_6595091, EPI_ISL_6595092, EPI_ISL_6595093, EPI_ISL_6595094, EPI_ISL_6595095, EPI_ISL_6595096, EPI_ISL_6595097, EPI_ISL_6595098, EPI_ISL_6595099, EPI_ISL_6595100, EPI_ISL_6595101, EPI_ISL_6595102, EPI_ISL_6595103, EPI_ISL_6595104, EPI_ISL_6595105, EPI_ISL_6595106, EPI_ISL_6595107, EPI_ISL_6595108, EPI_ISL_6595109, EPI_ISL_6595110, EPI_ISL_6595111, EPI_ISL_6595112, EPI_ISL_6595113, EPI_ISL_6595114, EPI_ISL_6595115, EPI_ISL_6595116, EPI_ISL_6595117, EPI_ISL_6595118, EPI_ISL_6595119, EPI_ISL_6595120, EPI_ISL_6595121, EPI_ISL_6595122, EPI_ISL_6595123, EPI_ISL_6595124, EPI_ISL_6595125, EPI_ISL_6595126, EPI_ISL_6595127, EPI_ISL_6595128, EPI_ISL_6595129, EPI_ISL_6595130, EPI_ISL_6595131, EPI_ISL_6595132, EPI_ISL_6595133, EPI_ISL_6595134, EPI_ISL_6595135, EPI_ISL_6595136, EPI_ISL_6595137, EPI_ISL_6595138, EPI_ISL_6595139, EPI_ISL_6595140, EPI_ISL_6595141, EPI_ISL_6595142, EPI_ISL_6595143, EPI_ISL_6595144, EPI_ISL_6595145, EPI_ISL_6595147, EPI_ISL_6595152, EPI_ISL_6595159, EPI_ISL_6595160, EPI_ISL_6595162                                                                                                                                                                                                                                                                                                                                                                                                                                                                                                                                                                                                                                                                                                                                                                                                                                                                                                                                                                                                                                                                                                                                                                                                                                                                                                                                                                                                                                                                                                                                                                                                                                                                                                                                                                                                                                                                                                                                                                                                                                                                                                                                                                                                                                                                                                                                                                                                                                                                                                                                                                                                                                                                                                                                                                                                                                                                                                                                                                                                                                                                                                                                                                                                                                                                                                                                                                                                                                                                                                                                                                                                                                                                                                                                                                                                                                                                                                                                                                                                                                                                                                                                                                                                                                                                                                                                                                                                                                                                                                                                                                                                                                                                                                                                                                                                                                                                                                                                                                                                                                                                                                                                                                                                                                                                                                                                                                                                                                                                                                                                                                                                                                                                                                                                                                                                                                                                                                                                                                                                                                                                                                                                                                                                                                                                                                                                                                                                                                                                                                                                                                                                                                                                                                                                                                                                                                                                                                                                                                                                                                                                                                                                                                                                                                                                                                                                                                                                                                                                                                                                                                                                                                                                                                                                                     |                                                           |                                                                                                                      |                                                                                                                                                                                                                                                                                                                                                                                                                                                                          |                                                                                                                     |
| see above                                                                                                                                                                                                                                                                                                                                                                                                                                                                                                                                                                                                                                                                                                                                                                                                                                                                                                                                                                                                                                                                                                                                                                                                                                                                                                                                                                                                                                                                                                                                                                                                                                                                                                                                                                                                                                                                                                                                                                                                                                                                                                                                                                                                                                                                                                                                                                                                                                                                                                                                                                                                                                                                                                                                                                                                                                                                                                                                                                                                                                                                                                                                                                                                                                                                                                                                                                                                                                                                                                                                                                                                                                                                                                                                                                                                                                                                                                                                                                                                                                                                                                                                                                                                                                                                                                                                                                                                                                                                                                                                                                                                                                                                                                                                                                                                                                                                                                                                                                                                                                                                                                                                                                                                                                                                                                                                                                                                                                                                                                                                                                                                                                                                                                                                                                                                                                                                                                                                                                                                                                                                                                                                                                                                                                                                                                                                                                                                                                                                                                                                                                                                                                                                                                                                                                                                                                                                                                                                                                                                                                                                                                                                                                                                                                                                                                                                                                                                                                                                                                                                                                                                                                                                                                                                                                                                                                                                                                                                                                                                                                                                                                                                                                                                                                                                                                                                                                                                                                                                                                                                                                                                                                                                                                                                                                                                                                                                                                                                                                                                                                                                                                                                                                                                                                                                                                                                                                                                                                                                                                                                                                                                                                                                                                                                                                                                                                                                                                                                                                                                                                                                                                                                                                                                                                                                                                                                                                                                                                                                                                                                        | Labo Analyses Med                                         | National Reference Center for Viruses of Respiratory Infections, Institut Pasteur, Paris                             | Angela Brisebarre; Arnaud Serpentin; Camille Capel; Caroline Gayon; Christine Freville; Christophe Malabat; Corinne Mafraix; Edouard Lamandin; Emmanuel Chanard; Emmanuel Pasquier; Etienne Simon-Lorière; F. Kerdavid; Frédéric Lemoine; Isabelle Butin; Julien Furney; Laurence Prots; Louise Lefrançois; Marianne Goyer; Marion Barbet; Maud Vanpee; Méline Bizard; Slim El Khari; Sylvie Behillill; Sylvie Van der Werf; ValéRie Weber; Vanessa Magin; Vincent Enouf |                                                                                                                     |
| EPI_ISL_6590653, EPI_ISL_6590655, EPI_ISL_6590657, EPI_ISL_6590656, EPI_ISL_6590670, EPI_ISL_6590679, EPI_ISL_6590686, EPI_ISL_6590703, EPI_ISL_6590712, EPI_ISL_6590716, EPI_ISL_6590722                                                                                                                                                                                                                                                                                                                                                                                                                                                                                                                                                                                                                                                                                                                                                                                                                                                                                                                                                                                                                                                                                                                                                                                                                                                                                                                                                                                                                                                                                                                                                                                                                                                                                                                                                                                                                                                                                                                                                                                                                                                                                                                                                                                                                                                                                                                                                                                                                                                                                                                                                                                                                                                                                                                                                                                                                                                                                                                                                                                                                                                                                                                                                                                                                                                                                                                                                                                                                                                                                                                                                                                                                                                                                                                                                                                                                                                                                                                                                                                                                                                                                                                                                                                                                                                                                                                                                                                                                                                                                                                                                                                                                                                                                                                                                                                                                                                                                                                                                                                                                                                                                                                                                                                                                                                                                                                                                                                                                                                                                                                                                                                                                                                                                                                                                                                                                                                                                                                                                                                                                                                                                                                                                                                                                                                                                                                                                                                                                                                                                                                                                                                                                                                                                                                                                                                                                                                                                                                                                                                                                                                                                                                                                                                                                                                                                                                                                                                                                                                                                                                                                                                                                                                                                                                                                                                                                                                                                                                                                                                                                                                                                                                                                                                                                                                                                                                                                                                                                                                                                                                                                                                                                                                                                                                                                                                                                                                                                                                                                                                                                                                                                                                                                                                                                                                                                                                                                                                                                                                                                                                                                                                                                                                                                                                                                                                                                                                                                                                                                                                                                                                                                                                                                                                                                                                                                                                                                        |                                                           |                                                                                                                      |                                                                                                                                                                                                                                                                                                                                                                                                                                                                          |                                                                                                                     |
| see above                                                                                                                                                                                                                                                                                                                                                                                                                                                                                                                                                                                                                                                                                                                                                                                                                                                                                                                                                                                                                                                                                                                                                                                                                                                                                                                                                                                                                                                                                                                                                                                                                                                                                                                                                                                                                                                                                                                                                                                                                                                                                                                                                                                                                                                                                                                                                                                                                                                                                                                                                                                                                                                                                                                                                                                                                                                                                                                                                                                                                                                                                                                                                                                                                                                                                                                                                                                                                                                                                                                                                                                                                                                                                                                                                                                                                                                                                                                                                                                                                                                                                                                                                                                                                                                                                                                                                                                                                                                                                                                                                                                                                                                                                                                                                                                                                                                                                                                                                                                                                                                                                                                                                                                                                                                                                                                                                                                                                                                                                                                                                                                                                                                                                                                                                                                                                                                                                                                                                                                                                                                                                                                                                                                                                                                                                                                                                                                                                                                                                                                                                                                                                                                                                                                                                                                                                                                                                                                                                                                                                                                                                                                                                                                                                                                                                                                                                                                                                                                                                                                                                                                                                                                                                                                                                                                                                                                                                                                                                                                                                                                                                                                                                                                                                                                                                                                                                                                                                                                                                                                                                                                                                                                                                                                                                                                                                                                                                                                                                                                                                                                                                                                                                                                                                                                                                                                                                                                                                                                                                                                                                                                                                                                                                                                                                                                                                                                                                                                                                                                                                                                                                                                                                                                                                                                                                                                                                                                                                                                                                                                                        | Labor Birn Charité Vivantes GmbH / Institut für Virologie | Charité Universitätsmedizin Berlin, Institut für Virologie/Labor Berlin                                              |                                                                                                                                                                                                                                                                                                                                                                                                                                                                          | Barbara Mühlemann; Christian Drosten; Christine Stephan; Peter Menzel; Rolf Schwarzer; Terry Jones; Victor M Corman |
| EPI_ISL_6587382, EPI_ISL_6587384, EPI_ISL_6587386, EPI_ISL_6587389, EPI_ISL_6587390, EPI_ISL_6587393, EPI_ISL_6587394                                                                                                                                                                                                                                                                                                                                                                                                                                                                                                                                                                                                                                                                                                                                                                                                                                                                                                                                                                                                                                                                                                                                                                                                                                                                                                                                                                                                                                                                                                                                                                                                                                                                                                                                                                                                                                                                                                                                                                                                                                                                                                                                                                                                                                                                                                                                                                                                                                                                                                                                                                                                                                                                                                                                                                                                                                                                                                                                                                                                                                                                                                                                                                                                                                                                                                                                                                                                                                                                                                                                                                                                                                                                                                                                                                                                                                                                                                                                                                                                                                                                                                                                                                                                                                                                                                                                                                                                                                                                                                                                                                                                                                                                                                                                                                                                                                                                                                                                                                                                                                                                                                                                                                                                                                                                                                                                                                                                                                                                                                                                                                                                                                                                                                                                                                                                                                                                                                                                                                                                                                                                                                                                                                                                                                                                                                                                                                                                                                                                                                                                                                                                                                                                                                                                                                                                                                                                                                                                                                                                                                                                                                                                                                                                                                                                                                                                                                                                                                                                                                                                                                                                                                                                                                                                                                                                                                                                                                                                                                                                                                                                                                                                                                                                                                                                                                                                                                                                                                                                                                                                                                                                                                                                                                                                                                                                                                                                                                                                                                                                                                                                                                                                                                                                                                                                                                                                                                                                                                                                                                                                                                                                                                                                                                                                                                                                                                                                                                                                                                                                                                                                                                                                                                                                                                                                                                                                                                                                                            |                                                           |                                                                                                                      |                                                                                                                                                                                                                                                                                                                                                                                                                                                                          |                                                                                                                     |
| see above                                                                                                                                                                                                                                                                                                                                                                                                                                                                                                                                                                                                                                                                                                                                                                                                                                                                                                                                                                                                                                                                                                                                                                                                                                                                                                                                                                                                                                                                                                                                                                                                                                                                                                                                                                                                                                                                                                                                                                                                                                                                                                                                                                                                                                                                                                                                                                                                                                                                                                                                                                                                                                                                                                                                                                                                                                                                                                                                                                                                                                                                                                                                                                                                                                                                                                                                                                                                                                                                                                                                                                                                                                                                                                                                                                                                                                                                                                                                                                                                                                                                                                                                                                                                                                                                                                                                                                                                                                                                                                                                                                                                                                                                                                                                                                                                                                                                                                                                                                                                                                                                                                                                                                                                                                                                                                                                                                                                                                                                                                                                                                                                                                                                                                                                                                                                                                                                                                                                                                                                                                                                                                                                                                                                                                                                                                                                                                                                                                                                                                                                                                                                                                                                                                                                                                                                                                                                                                                                                                                                                                                                                                                                                                                                                                                                                                                                                                                                                                                                                                                                                                                                                                                                                                                                                                                                                                                                                                                                                                                                                                                                                                                                                                                                                                                                                                                                                                                                                                                                                                                                                                                                                                                                                                                                                                                                                                                                                                                                                                                                                                                                                                                                                                                                                                                                                                                                                                                                                                                                                                                                                                                                                                                                                                                                                                                                                                                                                                                                                                                                                                                                                                                                                                                                                                                                                                                                                                                                                                                                                                                                        | Laboratori de Referencia de Catalunya                     | Laboratori de Referencia de Catalunya                                                                                |                                                                                                                                                                                                                                                                                                                                                                                                                                                                          | Bellosillo B.; Canal M.; Hernandez JJ.; Padilla E.; Ramirez A.; Vilas A.                                            |
| EPI_ISL_6590759                                                                                                                                                                                                                                                                                                                                                                                                                                                                                                                                                                                                                                                                                                                                                                                                                                                                                                                                                                                                                                                                                                                                                                                                                                                                                                                                                                                                                                                                                                                                                                                                                                                                                                                                                                                                                                                                                                                                                                                                                                                                                                                                                                                                                                                                                                                                                                                                                                                                                                                                                                                                                                                                                                                                                                                                                                                                                                                                                                                                                                                                                                                                                                                                                                                                                                                                                                                                                                                                                                                                                                                                                                                                                                                                                                                                                                                                                                                                                                                                                                                                                                                                                                                                                                                                                                                                                                                                                                                                                                                                                                                                                                                                                                                                                                                                                                                                                                                                                                                                                                                                                                                                                                                                                                                                                                                                                                                                                                                                                                                                                                                                                                                                                                                                                                                                                                                                                                                                                                                                                                                                                                                                                                                                                                                                                                                                                                                                                                                                                                                                                                                                                                                                                                                                                                                                                                                                                                                                                                                                                                                                                                                                                                                                                                                                                                                                                                                                                                                                                                                                                                                                                                                                                                                                                                                                                                                                                                                                                                                                                                                                                                                                                                                                                                                                                                                                                                                                                                                                                                                                                                                                                                                                                                                                                                                                                                                                                                                                                                                                                                                                                                                                                                                                                                                                                                                                                                                                                                                                                                                                                                                                                                                                                                                                                                                                                                                                                                                                                                                                                                                                                                                                                                                                                                                                                                                                                                                                                                                                                                                                  | Laboratorium Analiz Lekarskich ALAB                       | Wojewodzka Stacja Sanitarno-Epidemiologiczna w Gorzowie Wielkopolskim                                                |                                                                                                                                                                                                                                                                                                                                                                                                                                                                          | Elzbieta Justynska; Klaudia Kobenzda-Wodarczac; Patrycja Faberska and Marek Margol; Renata Siegel                   |
| EPI_ISL_6590641, EPI_ISL_6590646, EPI_ISL_6590650, EPI_ISL_6590743, EPI_ISL_6590744                                                                                                                                                                                                                                                                                                                                                                                                                                                                                                                                                                                                                                                                                                                                                                                                                                                                                                                                                                                                                                                                                                                                                                                                                                                                                                                                                                                                                                                                                                                                                                                                                                                                                                                                                                                                                                                                                                                                                                                                                                                                                                                                                                                                                                                                                                                                                                                                                                                                                                                                                                                                                                                                                                                                                                                                                                                                                                                                                                                                                                                                                                                                                                                                                                                                                                                                                                                                                                                                                                                                                                                                                                                                                                                                                                                                                                                                                                                                                                                                                                                                                                                                                                                                                                                                                                                                                                                                                                                                                                                                                                                                                                                                                                                                                                                                                                                                                                                                                                                                                                                                                                                                                                                                                                                                                                                                                                                                                                                                                                                                                                                                                                                                                                                                                                                                                                                                                                                                                                                                                                                                                                                                                                                                                                                                                                                                                                                                                                                                                                                                                                                                                                                                                                                                                                                                                                                                                                                                                                                                                                                                                                                                                                                                                                                                                                                                                                                                                                                                                                                                                                                                                                                                                                                                                                                                                                                                                                                                                                                                                                                                                                                                                                                                                                                                                                                                                                                                                                                                                                                                                                                                                                                                                                                                                                                                                                                                                                                                                                                                                                                                                                                                                                                                                                                                                                                                                                                                                                                                                                                                                                                                                                                                                                                                                                                                                                                                                                                                                                                                                                                                                                                                                                                                                                                                                                                                                                                                                                                              | Laboratorium Biologii Molekularnej                        | Wojewodzka Stacja Sanitarno-Epidemiologiczna w Gorzowie Wielkopolskim                                                |                                                                                                                                                                                                                                                                                                                                                                                                                                                                          | Elzbieta Justynska; Klaudia Kobenzda-Wodarczac; Patrycja Faberska and Marek Margol; Renata Siegel                   |
| EPI_ISL_6585741, EPI_ISL_6585744, EPI_ISL_6585745, EPI_ISL_6585746, EPI_ISL_6585748, EPI_ISL_6585749, EPI_ISL_6585750, EPI_ISL_6585751, EPI_ISL_6585800, EPI_ISL_6585802, EPI_ISL_6585803, EPI_ISL_6585804, EPI_ISL_6585805, EPI_ISL_6585810, EPI_ISL_6585811, EPI_ISL_6585814, EPI_ISL_6585814, EPI_ISL_6585817, EPI_ISL_6585818, EPI_ISL_6585819, EPI_ISL_6585821, EPI_ISL_6585823, EPI_ISL_6585824, EPI_ISL_6585825, EPI_ISL_6585844, EPI_ISL_6585844, EPI_ISL_6585847, EPI_ISL_6585848, EPI_ISL_6585850, EPI_ISL_6585851, EPI_ISL_6585852, EPI_ISL_6585853, EPI_ISL_6585854, EPI_ISL_6585855, EPI_ISL_6585856, EPI_ISL_6585857, EPI_ISL_6585858, EPI_ISL_6585859, EPI_ISL_6585860, EPI_ISL_6585861, EPI_ISL_6585862, EPI_ISL_6585863, EPI_ISL_6585864, EPI_ISL_6585865, EPI_ISL_6585866, EPI_ISL_6585867, EPI_ISL_6585868, EPI_ISL_6585869, EPI_ISL_6585874, EPI_ISL_6585879, EPI_ISL_6585880, EPI_ISL_6585881, EPI_ISL_6585884, EPI_ISL_6585884, EPI_ISL_6585886, EPI_ISL_6585887, EPI_ISL_6585888, EPI_ISL_6585890, EPI_ISL_6585892, EPI_ISL_6585893, EPI_ISL_6585894, EPI_ISL_6585895, EPI_ISL_6585896, EPI_ISL_6585907, EPI_ISL_6585910, EPI_ISL_6585911, EPI_ISL_6585912, EPI_ISL_6585923, EPI_ISL_6585924, EPI_ISL_6585925, EPI_ISL_6585927, EPI_ISL_6585932, EPI_ISL_6585933, EPI_ISL_6585935, EPI_ISL_6585936, EPI_ISL_6585937, EPI_ISL_6586133, EPI_ISL_6586134, EPI_ISL_6586136                                                                                                                                                                                                                                                                                                                                                                                                                                                                                                                                                                                                                                                                                                                                                                                                                                                                                                                                                                                                                                                                                                                                                                                                                                                                                                                                                                                                                                                                                                                                                                                                                                                                                                                                                                                                                                                                                                                                                                                                                                                                                                                                                                                                                                                                                                                                                                                                                                                                                                                                                                                                                                                                                                                                                                                                                                                                                                                                                                                                                                                                                                                                                                                                                                                                                                                                                                                                                                                                                                                                                                                                                                                                                                                                                                                                                                                                                                                                                                                                                                                                                                                                                                                                                                                                                                                                                                                                                                                                                                                                                                                                                                                                                                                                                                                                                                                                                                                                                                                                                                                                                                                                                                                                                                                                                                                                                                                                                                                                                                                                                                                                                                                                                                                                                                                                                                                                                                                                                                                                                                                                                                                                                                                                                                                                                                                                                                                                                                                                                                                                                                                                                                                                                                                                                                                                                                                                                                                                                                                                                                                                                                                                                                                                                                                                                                                                                                                                                                                                                                                                                                                                                                                                                                                                                                                                                                                                                                                                                                                                                                                                                                                                                                                                                                                                                                                                                                                                                                                                                                                                                                                                                                                                                                                                                                                                                                                                                                                                                                                                                                                                                                                                                    |                                                           |                                                                                                                      |                                                                                                                                                                                                                                                                                                                                                                                                                                                                          |                                                                                                                     |
| see above                                                                                                                                                                                                                                                                                                                                                                                                                                                                                                                                                                                                                                                                                                                                                                                                                                                                                                                                                                                                                                                                                                                                                                                                                                                                                                                                                                                                                                                                                                                                                                                                                                                                                                                                                                                                                                                                                                                                                                                                                                                                                                                                                                                                                                                                                                                                                                                                                                                                                                                                                                                                                                                                                                                                                                                                                                                                                                                                                                                                                                                                                                                                                                                                                                                                                                                                                                                                                                                                                                                                                                                                                                                                                                                                                                                                                                                                                                                                                                                                                                                                                                                                                                                                                                                                                                                                                                                                                                                                                                                                                                                                                                                                                                                                                                                                                                                                                                                                                                                                                                                                                                                                                                                                                                                                                                                                                                                                                                                                                                                                                                                                                                                                                                                                                                                                                                                                                                                                                                                                                                                                                                                                                                                                                                                                                                                                                                                                                                                                                                                                                                                                                                                                                                                                                                                                                                                                                                                                                                                                                                                                                                                                                                                                                                                                                                                                                                                                                                                                                                                                                                                                                                                                                                                                                                                                                                                                                                                                                                                                                                                                                                                                                                                                                                                                                                                                                                                                                                                                                                                                                                                                                                                                                                                                                                                                                                                                                                                                                                                                                                                                                                                                                                                                                                                                                                                                                                                                                                                                                                                                                                                                                                                                                                                                                                                                                                                                                                                                                                                                                                                                                                                                                                                                                                                                                                                                                                                                                                                                                                                                        | Laverty Pathology                                         | NSW Health Pathology - Institute of Clinical Pathology and Medical Research; Westmead Hospital; University of Sydney |                                                                                                                                                                                                                                                                                                                                                                                                                                                                          | Arnott A.; Draper J.; Gall M.; Martinez E.; Rockett R.; Sintchenko V.; on behalf of ICPMR                           |
| EPI_ISL_6591249, EPI_ISL_6592193, EPI_ISL_6592306, EPI_ISL_6592318, EPI_ISL_6592322, EPI_ISL_6592324, EPI_ISL_6592330, EPI_ISL_6592338, EPI_ISL_6592339, EPI_ISL_6592346, EPI_ISL_6592351, EPI_ISL_6592357, EPI_ISL_6592358, EPI_ISL_6592365, EPI_ISL_6592382, EPI_ISL_6592388, EPI_ISL_6592416, EPI_ISL_6592421, EPI_ISL_6592435, EPI_ISL_6592440, EPI_ISL_6592442, EPI_ISL_6592444, EPI_ISL_6592456, EPI_ISL_6592458, EPI_ISL_6592459, EPI_ISL_6592461, EPI_ISL_6592462, EPI_ISL_6592466, EPI_ISL_6592467, EPI_ISL_6592468, EPI_ISL_6592470, EPI_ISL_6592472, EPI_ISL_6592476, EPI_ISL_6592479, EPI_ISL_6592481, EPI_ISL_6592480, EPI_ISL_6592490, EPI_ISL_6592491, EPI_ISL_6592495, EPI_ISL_6592496, EPI_ISL_6592497, EPI_ISL_6592499, EPI_ISL_6592504, EPI_ISL_6592506, EPI_ISL_6592509, EPI_ISL_6592514, EPI_ISL_6592516, EPI_ISL_6592517, EPI_ISL_6592520, EPI_ISL_6592521, EPI_ISL_6592525, EPI_ISL_6592527, EPI_ISL_6592529, EPI_ISL_6592583, EPI_ISL_6592584, EPI_ISL_6592585, EPI_ISL_6592587, EPI_ISL_6592588, EPI_ISL_6592589, EPI_ISL_6592590, EPI_ISL_6592592, EPI_ISL_6592593, EPI_ISL_6592594, EPI_ISL_6592596, EPI_ISL_6592598, EPI_ISL_6592601, EPI_ISL_6592602, EPI_ISL_6592603, EPI_ISL_6592604, EPI_ISL_6592605, EPI_ISL_6592606, EPI_ISL_6592607, EPI_ISL_6592608, EPI_ISL_6592609, EPI_ISL_6592610, EPI_ISL_6592611, EPI_ISL_6592612, EPI_ISL_6592613, EPI_ISL_6592614, EPI_ISL_6592615, EPI_ISL_6592616, EPI_ISL_6592617, EPI_ISL_6592618, EPI_ISL_6592619, EPI_ISL_6592620, EPI_ISL_6592621, EPI_ISL_6592622, EPI_ISL_6592623, EPI_ISL_6592624, EPI_ISL_6592625, EPI_ISL_6592626, EPI_ISL_6592627, EPI_ISL_6592628, EPI_ISL_6592629, EPI_ISL_6592630, EPI_ISL_6592631, EPI_ISL_6592632, EPI_ISL_6592633, EPI_ISL_6592634, EPI_ISL_6592635, EPI_ISL_6592636, EPI_ISL_6592637, EPI_ISL_6592638, EPI_ISL_6592639, EPI_ISL_6592640, EPI_ISL_6592641, EPI_ISL_6592642, EPI_ISL_6592643, EPI_ISL_6592644, EPI_ISL_6592645, EPI_ISL_6592646, EPI_ISL_6592647, EPI_ISL_6592648, EPI_ISL_6592649, EPI_ISL_6592650, EPI_ISL_6592651, EPI_ISL_6592652, EPI_ISL_6592653, EPI_ISL_6592654, EPI_ISL_6592655, EPI_ISL_6592656, EPI_ISL_6592657, EPI_ISL_6592658, EPI_ISL_6592659, EPI_ISL_6592660, EPI_ISL_6592661, EPI_ISL_6592662, EPI_ISL_6592663, EPI_ISL_6592664, EPI_ISL_6592665, EPI_ISL_6592666, EPI_ISL_6592667, EPI_ISL_6592668, EPI_ISL_6592669, EPI_ISL_6592670, EPI_ISL_6592671, EPI_ISL_6592672, EPI_ISL_6592673, EPI_ISL_6592674, EPI_ISL_6592675, EPI_ISL_6592676, EPI_ISL_6592677, EPI_ISL_6592678, EPI_ISL_6592679, EPI_ISL_6592680, EPI_ISL_6592681, EPI_ISL_6592682, EPI_ISL_6592683, EPI_ISL_6592684, EPI_ISL_6592685, EPI_ISL_6592686, EPI_ISL_6592687, EPI_ISL_6592688, EPI_ISL_6592689, EPI_ISL_6592690, EPI_ISL_6592691, EPI_ISL_6592692, EPI_ISL_6592693, EPI_ISL_6592694, EPI_ISL_6592695, EPI_ISL_6592696, EPI_ISL_6592697, EPI_ISL_6592698, EPI_ISL_6592699, EPI_ISL_6592700, EPI_ISL_6592701, EPI_ISL_6592702, EPI_ISL_6592703, EPI_ISL_6592704, EPI_ISL_6592705, EPI_ISL_6592706, EPI_ISL_6592707, EPI_ISL_6592708, EPI_ISL_6592709, EPI_ISL_6592710, EPI_ISL_6592711, EPI_ISL_6592712, EPI_ISL_6592713, EPI_ISL_6592714, EPI_ISL_6592715, EPI_ISL_6592716, EPI_ISL_6592717, EPI_ISL_6592718, EPI_ISL_6592719, EPI_ISL_6592720, EPI_ISL_6592721, EPI_ISL_6592722, EPI_ISL_6592723, EPI_ISL_6592724, EPI_ISL_6592725, EPI_ISL_6592726, EPI_ISL_6592727, EPI_ISL_6592728, EPI_ISL_6592729, EPI_ISL_6592730, EPI_ISL_6592731, EPI_ISL_6592732, EPI_ISL_6592733, EPI_ISL_6592734, EPI_ISL_6592735, EPI_ISL_6592736, EPI_ISL_6592737, EPI_ISL_6592738, EPI_ISL_6592739, EPI_ISL_6592740, EPI_ISL_6592741, EPI_ISL_6592742, EPI_ISL_6592743, EPI_ISL_6592744, EPI_ISL_6592745, EPI_ISL_6592746, EPI_ISL_6592747, EPI_ISL_6592748, EPI_ISL_6592749, EPI_ISL_6592750, EPI_ISL_6592751, EPI_ISL_6592752, EPI_ISL_6592753, EPI_ISL_6592754, EPI_ISL_6592755, EPI_ISL_6592756, EPI_ISL_6592757, EPI_ISL_6592758, EPI_ISL_6592759, EPI_ISL_6592760, EPI_ISL_6592761, EPI_ISL_6592762, EPI_ISL_6592763, EPI_ISL_6592764, EPI_ISL_6592765, EPI_ISL_6592766, EPI_ISL_6592767, EPI_ISL_6592768, EPI_ISL_6592769, EPI_ISL_6592770, EPI_ISL_6592771, EPI_ISL_6592772, EPI_ISL_6592773, EPI_ISL_6592774, EPI_ISL_6592775, EPI_ISL_6592776, EPI_ISL_6592777, EPI_ISL_6592778, EPI_ISL_6592779, EPI_ISL_6592780, EPI_ISL_6592781, EPI_ISL_6592782, EPI_ISL_6592783, EPI_ISL_6592784, EPI_ISL_6592785, EPI_ISL_6592786, EPI_ISL_6592787, EPI_ISL_6592788, EPI_ISL_6592789, EPI_ISL_6592790, EPI_ISL_6592791, EPI_ISL_6592792, EPI_ISL_6592793, EPI_ISL_6592794, EPI_ISL_6592795, EPI_ISL_6592796, EPI_ISL_6592797, EPI_ISL_6592798, EPI_ISL_6592799, EPI_ISL_6592800, EPI_ISL_6592801, EPI_ISL_6592802, EPI_ISL_6592803, EPI_ISL_6592804, EPI_ISL_6592805, EPI_ISL_6592806, EPI_ISL_6592807, EPI_ISL_6592808, EPI_ISL_6592809, EPI_ISL_6592810, EPI_ISL_6592811, EPI_ISL_6592812, EPI_ISL_6592813, EPI_ISL_6592814, EPI_ISL_6592815, EPI_ISL_6592816, EPI_ISL_6592817, EPI_ISL_6592818, EPI_ISL_6592819, EPI_ISL_6592820, EPI_ISL_6592821, EPI_ISL_6592822, EPI_ISL_6592823, EPI_ISL_6592824, EPI_ISL_6592825, EPI_ISL_6592826, EPI_ISL_6592827, EPI_ISL_6592828, EPI_ISL_6592829, EPI_ISL_6592830, EPI_ISL_6592831, EPI_ISL_6592832, EPI_ISL_6592833, EPI_ISL_6592834, EPI_ISL_6592835, EPI_ISL_6592836, EPI_ISL_6592837, EPI_ISL_6592838, EPI_ISL_6592839, EPI_ISL_6592840, EPI_ISL_6592841, EPI_ISL_6592842, EPI_ISL_6592843, EPI_ISL_6592844, EPI_ISL_6592845, EPI_ISL_6592846, EPI_ISL_6592847, EPI_ISL_6592848, EPI_ISL_6592849, EPI_ISL_6592850, EPI_ISL_6592851, EPI_ISL_6592852, EPI_ISL_6592853, EPI_ISL_6592854, EPI_ISL_6592855, EPI_ISL_6592856, EPI_ISL_6592857, EPI_ISL_6592858, EPI_ISL_6592859, EPI_ISL_6592860, EPI_ISL_6592861, EPI_ISL_6592862, EPI_ISL_6592863, EPI_ISL_6592864, EPI_ISL_6592865, EPI_ISL_6592866, EPI_ISL_6592867, EPI_ISL_6592868, EPI_ISL_6592869, EPI_ISL_6592870, EPI_ISL_6592871, EPI_ISL_6592872, EPI_ISL_6592873, EPI_ISL_6592874, EPI_ISL_6592875, EPI_ISL_6592876, EPI_ISL_6592877, EPI_ISL_6592878, EPI_ISL_6592879, EPI_ISL_6592880, EPI_ISL_6592881, EPI_ISL_6592882, EPI_ISL_6592883, EPI_ISL_6592884, EPI_ISL_6592885, EPI_ISL_6592886, EPI_ISL_6592887, EPI_ISL_6592888, EPI_ISL_6592889, EPI_ISL_6592890, EPI_ISL_6592891, EPI_ISL_6592892, EPI_ISL_6592893, EPI_ISL_6592894, EPI_ISL_6592895, EPI_ISL_6592896, EPI_ISL_6592897, EPI_ISL_6592898, EPI_ISL_6592899, EPI_ISL_6592900, EPI_ISL_6592901, EPI_ISL_6592902, EPI_ISL_6592903, EPI_ISL_6592904, EPI_ISL_6592905, EPI_ISL_6592906, EPI_ISL_6592907, EPI_ISL_6592908, EPI_ISL_6592909, EPI_ISL_6592910, EPI_ISL_6592911, EPI_ISL_6592912, EPI_ISL_6592913, EPI_ISL_6592914, EPI_ISL_6592915, EPI_ISL_6592916, EPI_ISL_6592917, EPI_ISL_6592918, EPI_ISL_6592919, EPI_ISL_6592920, EPI_ISL_6592921, EPI_ISL_6592922, EPI_ISL_6592923, EPI_ISL_6592924, EPI_ISL_6592925, EPI_ISL_6592926, EPI_ISL_6592927, EPI_ISL_6592928, EPI_ISL_6592929, EPI_ISL_6592930, EPI_ISL_6592931, EPI_ISL_6592932, EPI_ISL_6592933, EPI_ISL_6592934, EPI_ISL_6592935, EPI_ISL_6592936, EPI_ISL_6592937, EPI_ISL_6592938, EPI_ISL_6592939, EPI_ISL_6592940, EPI_ISL_6592941, EPI_ISL_6592942, EPI_ISL_6592943, EPI_ISL_6592944, EPI_ISL_6592945, EPI_ISL_6592946, EPI_ISL_6592947, EPI_ISL_6592948, EPI_ISL_6592949, EPI_ISL_6592950, EPI_ISL_6592951, EPI_ISL_6592952, EPI_ISL_6592953, EPI_ISL_6592954, EPI_ISL_6592955, EPI_ISL_6592956, EPI_ISL_6592957, EPI_ISL_6592958, EPI_ISL_6592959, EPI_ISL_6592960, EPI_ISL_6592961, EPI_ISL_6592962, EPI_ISL_6592963, EPI_ISL_6592964, EPI_ISL_6592965, EPI_ISL_6592966, EPI_ISL_6592967, EPI_ISL_6592968, EPI_ISL_6592969, EPI_ISL_6592970, EPI_ISL_6592971, EPI_ISL_6592972, EPI_ISL_6592973, EPI_ISL_6592974, EPI_ISL_6592975, EPI_ISL_6592976, EPI_ISL_6592977, EPI_ISL_6592978, EPI_ISL_6592979, EPI_ISL_6592980, EPI_ISL_6592981, EPI_ISL_6592982, EPI_ISL_6592983, EPI_ISL_6592984, EPI_ISL_6592985, EPI_ISL_6592986, EPI_ISL_6592987, EPI_ISL_6592988, EPI_ISL_6592989, EPI_ISL_6592990, EPI_ISL_6592991, EPI_ISL_6592992, EPI_ISL_6592993, EPI_ISL_6592994, EPI_ISL_6592995, EPI_ISL_6592996, EPI_ISL_6592997, EPI_ISL_6592998, EPI_ISL_6592999, EPI_ISL_6593000, EPI_ISL_6593001, EPI_ISL_6593002, EPI_ISL_6593003, EPI_ISL_6593004, EPI_ISL_6593005, EPI_ISL_6593006, EPI_ISL_6593007, EPI_ISL_6593008, EPI_ISL_6593009, EPI_ISL_6593010, EPI_ISL_6593011, EPI_ISL_6593012, EPI_ISL_6593013, EPI_ISL_6593014, EPI_ISL_6593015, EPI_ISL_6593016, EPI_ISL_6593017, EPI_ISL_6593018, EPI_ISL_6593019, EPI_ISL_6593020, EPI_ISL_6593021, EPI_ISL_6593022, EPI_ISL_6593023, EPI_ISL_6593024, EPI_ISL_6593025, EPI_ISL_6593026, EPI_ISL_6593027, EPI_ISL_6593028, EPI_ISL_6593029, EPI_ISL_6593030, EPI_ISL_6593031, EPI_ISL_6593032, EPI_ISL_6593033, EPI_ISL_6593034, EPI_ISL_6593035, EPI_ISL_6593036, EPI_ISL_6593037, EPI_ISL_6593038, EPI_ISL_6593039, EPI_ISL_6593040, EPI_ISL_6593041, EPI_ISL_6593042, EPI_ISL_6593043, EPI_ISL_6593044, EPI_ISL_6593045, EPI_ISL_6593046, EPI_ISL_6593047, EPI_ISL_6593048, EPI_ISL_6593049, EPI_ISL_6593050, EPI_ISL_6593051, EPI_ISL_6593052, EPI_ISL_6593053, EPI_ISL_6593054, EPI_ISL_6593055, EPI_ISL_6593056, EPI_ISL_6593057, EPI_ISL_6593058, EPI_ISL_6593059, EPI_ISL_6593060, EPI_ISL_6593061, EPI_ISL_6593062, EPI_ISL_6593063, EPI_ISL_6593064, EPI_ISL_6593065, EPI_ISL_6593066, EPI_ISL_6593067, EPI_ISL_6593068, EPI_ISL_6593069, EPI_ISL_6593070, EPI_ISL_6593071, EPI_ISL_6593072, EPI_ISL_6593073, EPI_ISL_6593074, EPI_ISL_6593075, EPI_ISL_6593076, EPI_ISL_6593077, EPI_ISL_6593078, EPI_ISL_6593079, EPI_ISL_6593080, EPI_ISL_6593081, EPI_ISL_6593082, EPI_ISL_6593083, EPI_ISL_6593084, EPI_ISL_6593085, EPI_ISL_6593086, EPI_ISL_6593087, EPI_ISL_6593088, EPI_ISL_6593089, EPI_ISL_6593090, EPI_ISL_6593091, EPI_ISL_6593092, EPI_ISL_6593093, EPI_ISL_6593094, EPI_ISL_6593095, EPI_ISL_6593096, EPI_ISL_6593097, EPI_ISL_6593098, EPI_ISL_6593099, EPI_ISL_6593100, EPI_ISL_6593101, EPI_ISL_6593102, EPI_ISL_6593103, EPI_ISL_6593104, EPI_ISL_6593105, EPI_ISL_6593106, EPI_ISL_6593107, EPI_ISL_6593108, EPI_ISL_6593109, EPI_ISL_6593110, EPI_ISL_6593111, EPI_ISL_6593112, EPI_ISL_6593113, EPI_ISL_6593114, EPI_ISL_6593115, EPI_ISL_6593116, EPI_ISL_6593117, EPI_ISL_6593118, EPI_ISL_6593119, EPI_ISL_6593120, EPI_ISL_6593121, EPI_ISL_6593122, EPI_ISL_6593123, EPI_ISL_6593124, EPI_ISL_6593125, EPI_ISL_6593126, EPI_ISL_6593127, EPI_ISL_6593128, EPI_ISL_6593129, EPI_ISL_6593130, EPI_ISL_65931 |                                                           |                                                                                                                      |                                                                                                                                                                                                                                                                                                                                                                                                                                                                          |                                                                                                                     |





|                                                                                                                                                                                                                                                                                                                                                                                                                                                                                                                                                                                                                                                                                                                                                                                                                                                                                                                                                                                                                                                                                                                                                                                                                                                                                                                                                                                                                                                                                                                                                                                                                                                                                                                                                                                                                                                                                                                                                                                                                                                                                                                                                                                                                                                                                                                                                                                                                                                                                                                                                                                                                                                                                                                                                                                                                                                                                                                                                                                                                                                                                                                                                                                                                                                                                                                                                                                                                                                                                                                                                                                                                                                                                                                                                                                                                                                                                                                                                                                                                                                                                                                                                                                                                                                                                                                                                                                                                                                                                                                                                                                                                                                                                                                                                                                                                                                                                                                                                                                                                                                                                                                                                                                                                                                                                                                                                                                                                                                    |                                                                                                            |                                                                                                                      |                                                                                                                                                                                                                             |
|----------------------------------------------------------------------------------------------------------------------------------------------------------------------------------------------------------------------------------------------------------------------------------------------------------------------------------------------------------------------------------------------------------------------------------------------------------------------------------------------------------------------------------------------------------------------------------------------------------------------------------------------------------------------------------------------------------------------------------------------------------------------------------------------------------------------------------------------------------------------------------------------------------------------------------------------------------------------------------------------------------------------------------------------------------------------------------------------------------------------------------------------------------------------------------------------------------------------------------------------------------------------------------------------------------------------------------------------------------------------------------------------------------------------------------------------------------------------------------------------------------------------------------------------------------------------------------------------------------------------------------------------------------------------------------------------------------------------------------------------------------------------------------------------------------------------------------------------------------------------------------------------------------------------------------------------------------------------------------------------------------------------------------------------------------------------------------------------------------------------------------------------------------------------------------------------------------------------------------------------------------------------------------------------------------------------------------------------------------------------------------------------------------------------------------------------------------------------------------------------------------------------------------------------------------------------------------------------------------------------------------------------------------------------------------------------------------------------------------------------------------------------------------------------------------------------------------------------------------------------------------------------------------------------------------------------------------------------------------------------------------------------------------------------------------------------------------------------------------------------------------------------------------------------------------------------------------------------------------------------------------------------------------------------------------------------------------------------------------------------------------------------------------------------------------------------------------------------------------------------------------------------------------------------------------------------------------------------------------------------------------------------------------------------------------------------------------------------------------------------------------------------------------------------------------------------------------------------------------------------------------------------------------------------------------------------------------------------------------------------------------------------------------------------------------------------------------------------------------------------------------------------------------------------------------------------------------------------------------------------------------------------------------------------------------------------------------------------------------------------------------------------------------------------------------------------------------------------------------------------------------------------------------------------------------------------------------------------------------------------------------------------------------------------------------------------------------------------------------------------------------------------------------------------------------------------------------------------------------------------------------------------------------------------------------------------------------------------------------------------------------------------------------------------------------------------------------------------------------------------------------------------------------------------------------------------------------------------------------------------------------------------------------------------------------------------------------------------------------------------------------------------------------------------------------------------------|------------------------------------------------------------------------------------------------------------|----------------------------------------------------------------------------------------------------------------------|-----------------------------------------------------------------------------------------------------------------------------------------------------------------------------------------------------------------------------|
| EPI_ISL_5586188, EPI_ISL_5586189, EPI_ISL_5586190                                                                                                                                                                                                                                                                                                                                                                                                                                                                                                                                                                                                                                                                                                                                                                                                                                                                                                                                                                                                                                                                                                                                                                                                                                                                                                                                                                                                                                                                                                                                                                                                                                                                                                                                                                                                                                                                                                                                                                                                                                                                                                                                                                                                                                                                                                                                                                                                                                                                                                                                                                                                                                                                                                                                                                                                                                                                                                                                                                                                                                                                                                                                                                                                                                                                                                                                                                                                                                                                                                                                                                                                                                                                                                                                                                                                                                                                                                                                                                                                                                                                                                                                                                                                                                                                                                                                                                                                                                                                                                                                                                                                                                                                                                                                                                                                                                                                                                                                                                                                                                                                                                                                                                                                                                                                                                                                                                                                  | Sullivan Nicolaides Pathology                                                                              | NSW Health Pathology - Institute of Clinical Pathology and Medical Research; Westmead Hospital; University of Sydney | Arnott A.; Draper J.; Gall M.; Martinez E.; Rockett R.; Sintchenko V.; on behalf of ICPRM                                                                                                                                   |
| EPI_ISL_5584318, EPI_ISL_5584320, EPI_ISL_5584321, EPI_ISL_5584322, EPI_ISL_5584323, EPI_ISL_5584324, EPI_ISL_5584325, EPI_ISL_5584326, EPI_ISL_5584329, EPI_ISL_5584332, EPI_ISL_5584334, EPI_ISL_5584336, EPI_ISL_5584337, EPI_ISL_5584338, EPI_ISL_5584339, EPI_ISL_5584340, EPI_ISL_5584341, EPI_ISL_5584343, EPI_ISL_5584344, EPI_ISL_5584348, EPI_ISL_5584349, EPI_ISL_5584810, EPI_ISL_5584811, EPI_ISL_5584812, EPI_ISL_5584814, EPI_ISL_5584815, EPI_ISL_5584816, EPI_ISL_5584817, EPI_ISL_5584818, EPI_ISL_5584819, EPI_ISL_5584821, EPI_ISL_5584824, EPI_ISL_5584826, EPI_ISL_5584828, EPI_ISL_5584830, EPI_ISL_5584831, EPI_ISL_5584832                                                                                                                                                                                                                                                                                                                                                                                                                                                                                                                                                                                                                                                                                                                                                                                                                                                                                                                                                                                                                                                                                                                                                                                                                                                                                                                                                                                                                                                                                                                                                                                                                                                                                                                                                                                                                                                                                                                                                                                                                                                                                                                                                                                                                                                                                                                                                                                                                                                                                                                                                                                                                                                                                                                                                                                                                                                                                                                                                                                                                                                                                                                                                                                                                                                                                                                                                                                                                                                                                                                                                                                                                                                                                                                                                                                                                                                                                                                                                                                                                                                                                                                                                                                                                                                                                                                                                                                                                                                                                                                                                                                                                                                                                                                                                                                                | see above                                                                                                  | City of Milwaukee Health Department Laboratory                                                                       | Amy Bauer; Jennifer Lentz; Manjeet Khubbar; Nandhakumar Balakrishnan; Samantha Scott; Sanjib Bhattacharyya                                                                                                                  |
| EPI_ISL_5587922                                                                                                                                                                                                                                                                                                                                                                                                                                                                                                                                                                                                                                                                                                                                                                                                                                                                                                                                                                                                                                                                                                                                                                                                                                                                                                                                                                                                                                                                                                                                                                                                                                                                                                                                                                                                                                                                                                                                                                                                                                                                                                                                                                                                                                                                                                                                                                                                                                                                                                                                                                                                                                                                                                                                                                                                                                                                                                                                                                                                                                                                                                                                                                                                                                                                                                                                                                                                                                                                                                                                                                                                                                                                                                                                                                                                                                                                                                                                                                                                                                                                                                                                                                                                                                                                                                                                                                                                                                                                                                                                                                                                                                                                                                                                                                                                                                                                                                                                                                                                                                                                                                                                                                                                                                                                                                                                                                                                                                    | Supratrach Micropath Laboratory Research Institute Pvt Ltd, Ahmedabad                                      | Gujarat Biotechnology Research Centre                                                                                | Apurvasinh Puar; Bhadreshsinh Gohil; Chaitanya Joshi; Dinesh Kumar; Janvi Raval; Madhvi Joshi; Nimesh Patel; Nitin Savaliya; Priyank Chavda; Ramesh Pandit; Shiva; Sonal Sharma; Zama Patel                                 |
| EPI_ISL_5585357, EPI_ISL_5585358, EPI_ISL_5585359, EPI_ISL_5585360                                                                                                                                                                                                                                                                                                                                                                                                                                                                                                                                                                                                                                                                                                                                                                                                                                                                                                                                                                                                                                                                                                                                                                                                                                                                                                                                                                                                                                                                                                                                                                                                                                                                                                                                                                                                                                                                                                                                                                                                                                                                                                                                                                                                                                                                                                                                                                                                                                                                                                                                                                                                                                                                                                                                                                                                                                                                                                                                                                                                                                                                                                                                                                                                                                                                                                                                                                                                                                                                                                                                                                                                                                                                                                                                                                                                                                                                                                                                                                                                                                                                                                                                                                                                                                                                                                                                                                                                                                                                                                                                                                                                                                                                                                                                                                                                                                                                                                                                                                                                                                                                                                                                                                                                                                                                                                                                                                                 | Sutter Santa Rosa Regional Hospital Lab                                                                    | Sonoma County Public Health Laboratory                                                                               | Carlos Gonzalez; Iryna Gorachuk; Lisa Critchett; Rachel Rees                                                                                                                                                                |
| EPI_ISL_5591199, EPI_ISL_5591204, EPI_ISL_5591206, EPI_ISL_5591208, EPI_ISL_5591209, EPI_ISL_5591210, EPI_ISL_5591211, EPI_ISL_5591213, EPI_ISL_5591214, EPI_ISL_5591215, EPI_ISL_5591216                                                                                                                                                                                                                                                                                                                                                                                                                                                                                                                                                                                                                                                                                                                                                                                                                                                                                                                                                                                                                                                                                                                                                                                                                                                                                                                                                                                                                                                                                                                                                                                                                                                                                                                                                                                                                                                                                                                                                                                                                                                                                                                                                                                                                                                                                                                                                                                                                                                                                                                                                                                                                                                                                                                                                                                                                                                                                                                                                                                                                                                                                                                                                                                                                                                                                                                                                                                                                                                                                                                                                                                                                                                                                                                                                                                                                                                                                                                                                                                                                                                                                                                                                                                                                                                                                                                                                                                                                                                                                                                                                                                                                                                                                                                                                                                                                                                                                                                                                                                                                                                                                                                                                                                                                                                          | see above                                                                                                  | Sweden/Sodermanland/Unilabs                                                                                          | Unilabs/Eskilstuna/Sweden                                                                                                                                                                                                   |
| EPI_ISL_5591158, EPI_ISL_5591159, EPI_ISL_5591161, EPI_ISL_5591162, EPI_ISL_5591163, EPI_ISL_5591164, EPI_ISL_5591165, EPI_ISL_5591166, EPI_ISL_5591167, EPI_ISL_5591168, EPI_ISL_5591169, EPI_ISL_5591170, EPI_ISL_5591171, EPI_ISL_5591172, EPI_ISL_5591173, EPI_ISL_5591174, EPI_ISL_5591175, EPI_ISL_5591176, EPI_ISL_5591177, EPI_ISL_5591178, EPI_ISL_5591179, EPI_ISL_5591180, EPI_ISL_5591181, EPI_ISL_5591182, EPI_ISL_5591183, EPI_ISL_5591184, EPI_ISL_5591185, EPI_ISL_5591186, EPI_ISL_5591187, EPI_ISL_5591188, EPI_ISL_5591189, EPI_ISL_5591190, EPI_ISL_5591191, EPI_ISL_5591192, EPI_ISL_5591193, EPI_ISL_5591194, EPI_ISL_5591195, EPI_ISL_5591196, EPI_ISL_5591197, EPI_ISL_5591198, EPI_ISL_5591199, EPI_ISL_5591200, EPI_ISL_5591201, EPI_ISL_5591202, EPI_ISL_5591203, EPI_ISL_5591205, EPI_ISL_5591207, EPI_ISL_5591212, EPI_ISL_5591217, EPI_ISL_5591218, EPI_ISL_5591252, EPI_ISL_5591253, EPI_ISL_5591254                                                                                                                                                                                                                                                                                                                                                                                                                                                                                                                                                                                                                                                                                                                                                                                                                                                                                                                                                                                                                                                                                                                                                                                                                                                                                                                                                                                                                                                                                                                                                                                                                                                                                                                                                                                                                                                                                                                                                                                                                                                                                                                                                                                                                                                                                                                                                                                                                                                                                                                                                                                                                                                                                                                                                                                                                                                                                                                                                                                                                                                                                                                                                                                                                                                                                                                                                                                                                                                                                                                                                                                                                                                                                                                                                                                                                                                                                                                                                                                                                                                                                                                                                                                                                                                                                                                                                                                                                                                                                                                | see above                                                                                                  | Sweden/Vastragotaland/Unilabs                                                                                        |                                                                                                                                                                                                                             |
| EPI_ISL_5585696, EPI_ISL_5585697, EPI_ISL_5585698, EPI_ISL_5585699, EPI_ISL_5585700                                                                                                                                                                                                                                                                                                                                                                                                                                                                                                                                                                                                                                                                                                                                                                                                                                                                                                                                                                                                                                                                                                                                                                                                                                                                                                                                                                                                                                                                                                                                                                                                                                                                                                                                                                                                                                                                                                                                                                                                                                                                                                                                                                                                                                                                                                                                                                                                                                                                                                                                                                                                                                                                                                                                                                                                                                                                                                                                                                                                                                                                                                                                                                                                                                                                                                                                                                                                                                                                                                                                                                                                                                                                                                                                                                                                                                                                                                                                                                                                                                                                                                                                                                                                                                                                                                                                                                                                                                                                                                                                                                                                                                                                                                                                                                                                                                                                                                                                                                                                                                                                                                                                                                                                                                                                                                                                                                | Sydney South West Pathology Service (SSWPS) - Concord Repatriation General Hospital - NSW Health Pathology | NSW Health Pathology - Institute of Clinical Pathology and Medical Research; Westmead Hospital; University of Sydney | Arnott A.; Draper J.; Gall M.; Martinez E.; Rockett R.; Sintchenko V.; on behalf of ICPRM                                                                                                                                   |
| EPI_ISL_5585796, EPI_ISL_5585797, EPI_ISL_5585913, EPI_ISL_5586077, EPI_ISL_5586138, EPI_ISL_5586139, EPI_ISL_5586140, EPI_ISL_5586143, EPI_ISL_5586144, EPI_ISL_5586174, EPI_ISL_5586175, EPI_ISL_5586177                                                                                                                                                                                                                                                                                                                                                                                                                                                                                                                                                                                                                                                                                                                                                                                                                                                                                                                                                                                                                                                                                                                                                                                                                                                                                                                                                                                                                                                                                                                                                                                                                                                                                                                                                                                                                                                                                                                                                                                                                                                                                                                                                                                                                                                                                                                                                                                                                                                                                                                                                                                                                                                                                                                                                                                                                                                                                                                                                                                                                                                                                                                                                                                                                                                                                                                                                                                                                                                                                                                                                                                                                                                                                                                                                                                                                                                                                                                                                                                                                                                                                                                                                                                                                                                                                                                                                                                                                                                                                                                                                                                                                                                                                                                                                                                                                                                                                                                                                                                                                                                                                                                                                                                                                                         | see above                                                                                                  | Sydney South West Pathology Service (SSWPS) - Liverpool Hospital - NSW Health Pathology                              | NSW Health Pathology - Institute of Clinical Pathology and Medical Research; Westmead Hospital; University of Sydney                                                                                                        |
| EPI_ISL_5601228, EPI_ISL_5601232, EPI_ISL_5601234, EPI_ISL_5601235, EPI_ISL_5601236, EPI_ISL_5601239, EPI_ISL_5601240, EPI_ISL_5601243, EPI_ISL_5601246, EPI_ISL_5601247, EPI_ISL_5601248, EPI_ISL_5601251, EPI_ISL_5601254, EPI_ISL_5601257, EPI_ISL_5601258, EPI_ISL_5601259, EPI_ISL_5601260, EPI_ISL_5601261, EPI_ISL_5601263, EPI_ISL_5601266, EPI_ISL_5601268, EPI_ISL_5601270, EPI_ISL_5601275, EPI_ISL_5601278, EPI_ISL_5601279, EPI_ISL_5601282, EPI_ISL_5601284, EPI_ISL_5601287, EPI_ISL_5601288, EPI_ISL_5601289, EPI_ISL_5601291, EPI_ISL_5601292                                                                                                                                                                                                                                                                                                                                                                                                                                                                                                                                                                                                                                                                                                                                                                                                                                                                                                                                                                                                                                                                                                                                                                                                                                                                                                                                                                                                                                                                                                                                                                                                                                                                                                                                                                                                                                                                                                                                                                                                                                                                                                                                                                                                                                                                                                                                                                                                                                                                                                                                                                                                                                                                                                                                                                                                                                                                                                                                                                                                                                                                                                                                                                                                                                                                                                                                                                                                                                                                                                                                                                                                                                                                                                                                                                                                                                                                                                                                                                                                                                                                                                                                                                                                                                                                                                                                                                                                                                                                                                                                                                                                                                                                                                                                                                                                                                                                                     | see above                                                                                                  | Karolinska University Hospital                                                                                       | Annelie Bjørkner; Isak Sylvén; Jan Albert; Karolina Ininberg; Lina Guerra Blomqvist; Lynda Eneh; Martin Ekman; Martina Wahlund; Robert Dyrda; Sandra Brodesson; Tanja Normark; Tobias Allander; Valterri Wirta; Zhibing Yun |
| EPI_ISL_5596145, EPI_ISL_5596146, EPI_ISL_5596147, EPI_ISL_5596148, EPI_ISL_5596149, EPI_ISL_5596150, EPI_ISL_5596151, EPI_ISL_5596156, EPI_ISL_5596159, EPI_ISL_5596161, EPI_ISL_5596160, EPI_ISL_5596162, EPI_ISL_5596163, EPI_ISL_5596164                                                                                                                                                                                                                                                                                                                                                                                                                                                                                                                                                                                                                                                                                                                                                                                                                                                                                                                                                                                                                                                                                                                                                                                                                                                                                                                                                                                                                                                                                                                                                                                                                                                                                                                                                                                                                                                                                                                                                                                                                                                                                                                                                                                                                                                                                                                                                                                                                                                                                                                                                                                                                                                                                                                                                                                                                                                                                                                                                                                                                                                                                                                                                                                                                                                                                                                                                                                                                                                                                                                                                                                                                                                                                                                                                                                                                                                                                                                                                                                                                                                                                                                                                                                                                                                                                                                                                                                                                                                                                                                                                                                                                                                                                                                                                                                                                                                                                                                                                                                                                                                                                                                                                                                                       | see above                                                                                                  | Synlab Suisse SA                                                                                                     | Clinical Bacteriology, University Hospital Basel                                                                                                                                                                            |
| EPI_ISL_5590619, EPI_ISL_5590621, EPI_ISL_5590622                                                                                                                                                                                                                                                                                                                                                                                                                                                                                                                                                                                                                                                                                                                                                                                                                                                                                                                                                                                                                                                                                                                                                                                                                                                                                                                                                                                                                                                                                                                                                                                                                                                                                                                                                                                                                                                                                                                                                                                                                                                                                                                                                                                                                                                                                                                                                                                                                                                                                                                                                                                                                                                                                                                                                                                                                                                                                                                                                                                                                                                                                                                                                                                                                                                                                                                                                                                                                                                                                                                                                                                                                                                                                                                                                                                                                                                                                                                                                                                                                                                                                                                                                                                                                                                                                                                                                                                                                                                                                                                                                                                                                                                                                                                                                                                                                                                                                                                                                                                                                                                                                                                                                                                                                                                                                                                                                                                                  | Szpital Uniwersytecki im. Karola Marcinkowskiego w Zielonej Górze Sp. z o.o.                               | Wojewodzka Stacja Sanitarno-Epidemiologiczna w Gorzowie Wielkopolskim                                                | Adrian Egli; Alfredo Mari; Fanny Wegner; Hans Hirsch; Helena MB Seth-Smith; Julia Bielicki; Karoline Leuzinger; Manuel Battagay; Tim Roloff                                                                                 |
| EPI_ISL_5602658, EPI_ISL_5602659, EPI_ISL_5602660, EPI_ISL_5602662, EPI_ISL_5602663, EPI_ISL_5602664, EPI_ISL_5602665, EPI_ISL_5602666, EPI_ISL_5602670, EPI_ISL_5602671, EPI_ISL_5602672, EPI_ISL_5602676, EPI_ISL_5602677, EPI_ISL_5602678, EPI_ISL_5602679, EPI_ISL_5602681, EPI_ISL_5602682, EPI_ISL_5602683, EPI_ISL_5602686, EPI_ISL_5602687, EPI_ISL_5602688, EPI_ISL_5602689, EPI_ISL_5602690, EPI_ISL_5602691, EPI_ISL_5602692, EPI_ISL_5602693, EPI_ISL_5602694, EPI_ISL_5602695, EPI_ISL_5602697, EPI_ISL_5602698, EPI_ISL_5602699, EPI_ISL_5602700, EPI_ISL_5602701, EPI_ISL_5602702, EPI_ISL_5602703, EPI_ISL_5602705, EPI_ISL_5602706                                                                                                                                                                                                                                                                                                                                                                                                                                                                                                                                                                                                                                                                                                                                                                                                                                                                                                                                                                                                                                                                                                                                                                                                                                                                                                                                                                                                                                                                                                                                                                                                                                                                                                                                                                                                                                                                                                                                                                                                                                                                                                                                                                                                                                                                                                                                                                                                                                                                                                                                                                                                                                                                                                                                                                                                                                                                                                                                                                                                                                                                                                                                                                                                                                                                                                                                                                                                                                                                                                                                                                                                                                                                                                                                                                                                                                                                                                                                                                                                                                                                                                                                                                                                                                                                                                                                                                                                                                                                                                                                                                                                                                                                                                                                                                                                | see above                                                                                                  | U.O. Microbiologia Laboratorio Unico Centro Servizi - AUSL della Romagna                                             | U.O. Microbiologia, Laboratorio Unico Centro Servizi - AUSL della Romagna                                                                                                                                                   |
| EPI_ISL_5601736, EPI_ISL_5601808                                                                                                                                                                                                                                                                                                                                                                                                                                                                                                                                                                                                                                                                                                                                                                                                                                                                                                                                                                                                                                                                                                                                                                                                                                                                                                                                                                                                                                                                                                                                                                                                                                                                                                                                                                                                                                                                                                                                                                                                                                                                                                                                                                                                                                                                                                                                                                                                                                                                                                                                                                                                                                                                                                                                                                                                                                                                                                                                                                                                                                                                                                                                                                                                                                                                                                                                                                                                                                                                                                                                                                                                                                                                                                                                                                                                                                                                                                                                                                                                                                                                                                                                                                                                                                                                                                                                                                                                                                                                                                                                                                                                                                                                                                                                                                                                                                                                                                                                                                                                                                                                                                                                                                                                                                                                                                                                                                                                                   | EPI_ISL_5601792, EPI_ISL_5601850, EPI_ISL_5602008                                                          | National Public Health Surveillance Laboratory                                                                       | UAB "Rezus.lt"                                                                                                                                                                                                              |
| EPI_ISL_5602233, EPI_ISL_5602234, EPI_ISL_5602236, EPI_ISL_5602237, EPI_ISL_5602238, EPI_ISL_5602239, EPI_ISL_5602240, EPI_ISL_5602241, EPI_ISL_5602245, EPI_ISL_5602246, EPI_ISL_5602247, EPI_ISL_5602248, EPI_ISL_5602249, EPI_ISL_5602250, EPI_ISL_5602251, EPI_ISL_5602252, EPI_ISL_5602253, EPI_ISL_5602254, EPI_ISL_5602256, EPI_ISL_5602257, EPI_ISL_5602258, EPI_ISL_5602259, EPI_ISL_5602260, EPI_ISL_5602261, EPI_ISL_5602262, EPI_ISL_5602264, EPI_ISL_5602265, EPI_ISL_5602266, EPI_ISL_5602267, EPI_ISL_5602268, EPI_ISL_5602270, EPI_ISL_5602271, EPI_ISL_5602272, EPI_ISL_5602273, EPI_ISL_5602274, EPI_ISL_5602275, EPI_ISL_5602276, EPI_ISL_5602277, EPI_ISL_5602278, EPI_ISL_5602279, EPI_ISL_5602280, EPI_ISL_5602281, EPI_ISL_5602282, EPI_ISL_5602283, EPI_ISL_5602284, EPI_ISL_5602285, EPI_ISL_5602286, EPI_ISL_5602287, EPI_ISL_5602288, EPI_ISL_5602289, EPI_ISL_5602290, EPI_ISL_5602291, EPI_ISL_5602292, EPI_ISL_5602293, EPI_ISL_5602294, EPI_ISL_5602295, EPI_ISL_5602296, EPI_ISL_5602297                                                                                                                                                                                                                                                                                                                                                                                                                                                                                                                                                                                                                                                                                                                                                                                                                                                                                                                                                                                                                                                                                                                                                                                                                                                                                                                                                                                                                                                                                                                                                                                                                                                                                                                                                                                                                                                                                                                                                                                                                                                                                                                                                                                                                                                                                                                                                                                                                                                                                                                                                                                                                                                                                                                                                                                                                                                                                                                                                                                                                                                                                                                                                                                                                                                                                                                                                                                                                                                                                                                                                                                                                                                                                                                                                                                                                                                                                                                                                                                                                                                                                                                                                                                                                                                                                                                                                                                                                           | see above                                                                                                  | UAB Medicína praktical laboratorija                                                                                  |                                                                                                                                                                                                                             |
| EPI_ISL_5588304, EPI_ISL_5588305, EPI_ISL_5588306, EPI_ISL_5588307, EPI_ISL_5588308, EPI_ISL_5588309, EPI_ISL_5588311, EPI_ISL_5588312, EPI_ISL_5588313, EPI_ISL_5588314, EPI_ISL_5588315, EPI_ISL_5588316, EPI_ISL_5588317, EPI_ISL_5588318                                                                                                                                                                                                                                                                                                                                                                                                                                                                                                                                                                                                                                                                                                                                                                                                                                                                                                                                                                                                                                                                                                                                                                                                                                                                                                                                                                                                                                                                                                                                                                                                                                                                                                                                                                                                                                                                                                                                                                                                                                                                                                                                                                                                                                                                                                                                                                                                                                                                                                                                                                                                                                                                                                                                                                                                                                                                                                                                                                                                                                                                                                                                                                                                                                                                                                                                                                                                                                                                                                                                                                                                                                                                                                                                                                                                                                                                                                                                                                                                                                                                                                                                                                                                                                                                                                                                                                                                                                                                                                                                                                                                                                                                                                                                                                                                                                                                                                                                                                                                                                                                                                                                                                                                       | see above                                                                                                  | ULS Castelo Branco                                                                                                   | Instituto Nacional de Saude (INSA)                                                                                                                                                                                          |
| EPI_ISL_5588403, EPI_ISL_5588404, EPI_ISL_5588405, EPI_ISL_5588406, EPI_ISL_5588407, EPI_ISL_5588409, EPI_ISL_5588410, EPI_ISL_5588411, EPI_ISL_5588412, EPI_ISL_5588413, EPI_ISL_5588414                                                                                                                                                                                                                                                                                                                                                                                                                                                                                                                                                                                                                                                                                                                                                                                                                                                                                                                                                                                                                                                                                                                                                                                                                                                                                                                                                                                                                                                                                                                                                                                                                                                                                                                                                                                                                                                                                                                                                                                                                                                                                                                                                                                                                                                                                                                                                                                                                                                                                                                                                                                                                                                                                                                                                                                                                                                                                                                                                                                                                                                                                                                                                                                                                                                                                                                                                                                                                                                                                                                                                                                                                                                                                                                                                                                                                                                                                                                                                                                                                                                                                                                                                                                                                                                                                                                                                                                                                                                                                                                                                                                                                                                                                                                                                                                                                                                                                                                                                                                                                                                                                                                                                                                                                                                          | see above                                                                                                  | ULS Litoral Alentejano                                                                                               | Instituto Nacional de Saude (INSA) and Institute of Biomedicine (iBiMed), Universidade de Aveiro                                                                                                                            |
| EPI_ISL_5588109                                                                                                                                                                                                                                                                                                                                                                                                                                                                                                                                                                                                                                                                                                                                                                                                                                                                                                                                                                                                                                                                                                                                                                                                                                                                                                                                                                                                                                                                                                                                                                                                                                                                                                                                                                                                                                                                                                                                                                                                                                                                                                                                                                                                                                                                                                                                                                                                                                                                                                                                                                                                                                                                                                                                                                                                                                                                                                                                                                                                                                                                                                                                                                                                                                                                                                                                                                                                                                                                                                                                                                                                                                                                                                                                                                                                                                                                                                                                                                                                                                                                                                                                                                                                                                                                                                                                                                                                                                                                                                                                                                                                                                                                                                                                                                                                                                                                                                                                                                                                                                                                                                                                                                                                                                                                                                                                                                                                                                    | ULS Norte Alentejano                                                                                       | Instituto Nacional de Saude (INSA)                                                                                   | Borges et al                                                                                                                                                                                                                |
| EPI_ISL_5588454, EPI_ISL_5588455, EPI_ISL_5588456, EPI_ISL_5588458, EPI_ISL_5588459, EPI_ISL_5588460, EPI_ISL_5588461, EPI_ISL_5588462, EPI_ISL_5588463                                                                                                                                                                                                                                                                                                                                                                                                                                                                                                                                                                                                                                                                                                                                                                                                                                                                                                                                                                                                                                                                                                                                                                                                                                                                                                                                                                                                                                                                                                                                                                                                                                                                                                                                                                                                                                                                                                                                                                                                                                                                                                                                                                                                                                                                                                                                                                                                                                                                                                                                                                                                                                                                                                                                                                                                                                                                                                                                                                                                                                                                                                                                                                                                                                                                                                                                                                                                                                                                                                                                                                                                                                                                                                                                                                                                                                                                                                                                                                                                                                                                                                                                                                                                                                                                                                                                                                                                                                                                                                                                                                                                                                                                                                                                                                                                                                                                                                                                                                                                                                                                                                                                                                                                                                                                                            | see above                                                                                                  | ULS Norte Alentejano                                                                                                 | Instituto Nacional de Saude (INSA) and Institute of Biomedicine (iBiMed), Universidade de Aveiro                                                                                                                            |
| EPI_ISL_5588322, EPI_ISL_5588324, EPI_ISL_5588325, EPI_ISL_5588331, EPI_ISL_5588333                                                                                                                                                                                                                                                                                                                                                                                                                                                                                                                                                                                                                                                                                                                                                                                                                                                                                                                                                                                                                                                                                                                                                                                                                                                                                                                                                                                                                                                                                                                                                                                                                                                                                                                                                                                                                                                                                                                                                                                                                                                                                                                                                                                                                                                                                                                                                                                                                                                                                                                                                                                                                                                                                                                                                                                                                                                                                                                                                                                                                                                                                                                                                                                                                                                                                                                                                                                                                                                                                                                                                                                                                                                                                                                                                                                                                                                                                                                                                                                                                                                                                                                                                                                                                                                                                                                                                                                                                                                                                                                                                                                                                                                                                                                                                                                                                                                                                                                                                                                                                                                                                                                                                                                                                                                                                                                                                                | ULSNE - Braganca                                                                                           | Instituto Nacional de Saude (INSA)                                                                                   | Borges et al                                                                                                                                                                                                                |
| EPI_ISL_5588334, EPI_ISL_5588335, EPI_ISL_5588340, EPI_ISL_5588342, EPI_ISL_5588343, EPI_ISL_5588344, EPI_ISL_5588345, EPI_ISL_5588346, EPI_ISL_5588347, EPI_ISL_5588348, EPI_ISL_5588349, EPI_ISL_5588353, EPI_ISL_5588354, EPI_ISL_5588356, EPI_ISL_5588358, EPI_ISL_5588363, EPI_ISL_5588364, EPI_ISL_5588371, EPI_ISL_5588372, EPI_ISL_5588377, EPI_ISL_5588378, EPI_ISL_5588379, EPI_ISL_5588380, EPI_ISL_5588381, EPI_ISL_5588383, EPI_ISL_5588384, EPI_ISL_5588386, EPI_ISL_5588387, EPI_ISL_5588388, EPI_ISL_5588391, EPI_ISL_5588398, EPI_ISL_5588402                                                                                                                                                                                                                                                                                                                                                                                                                                                                                                                                                                                                                                                                                                                                                                                                                                                                                                                                                                                                                                                                                                                                                                                                                                                                                                                                                                                                                                                                                                                                                                                                                                                                                                                                                                                                                                                                                                                                                                                                                                                                                                                                                                                                                                                                                                                                                                                                                                                                                                                                                                                                                                                                                                                                                                                                                                                                                                                                                                                                                                                                                                                                                                                                                                                                                                                                                                                                                                                                                                                                                                                                                                                                                                                                                                                                                                                                                                                                                                                                                                                                                                                                                                                                                                                                                                                                                                                                                                                                                                                                                                                                                                                                                                                                                                                                                                                                                     | see above                                                                                                  | UNILABS                                                                                                              | Instituto Nacional de Saude (INSA)                                                                                                                                                                                          |
| EPI_ISL_5584655, EPI_ISL_5584656, EPI_ISL_5584657, EPI_ISL_5584658, EPI_ISL_5584659, EPI_ISL_5584660, EPI_ISL_5584661, EPI_ISL_5584662, EPI_ISL_5584663, EPI_ISL_5584664, EPI_ISL_5584665, EPI_ISL_5584666, EPI_ISL_5584667, EPI_ISL_5584668, EPI_ISL_5584671, EPI_ISL_5584672, EPI_ISL_5584673, EPI_ISL_5584674, EPI_ISL_5584675, EPI_ISL_5584676, EPI_ISL_5584677, EPI_ISL_5584678, EPI_ISL_5584679, EPI_ISL_5584680, EPI_ISL_5584681, EPI_ISL_5584682, EPI_ISL_5584683, EPI_ISL_5584684, EPI_ISL_5584685, EPI_ISL_5584686, EPI_ISL_5584687, EPI_ISL_5584688, EPI_ISL_5584689, EPI_ISL_5584690, EPI_ISL_5584691, EPI_ISL_5584692, EPI_ISL_5584693, EPI_ISL_5584694, EPI_ISL_5584695, EPI_ISL_5584696, EPI_ISL_5584697, EPI_ISL_5584698, EPI_ISL_5584699, EPI_ISL_5584700, EPI_ISL_5584701, EPI_ISL_5584702, EPI_ISL_5584703, EPI_ISL_5584704, EPI_ISL_5584705, EPI_ISL_5584706, EPI_ISL_5584707, EPI_ISL_5584708, EPI_ISL_5584709, EPI_ISL_5584710, EPI_ISL_5584711, EPI_ISL_5584712, EPI_ISL_5584713, EPI_ISL_5584714, EPI_ISL_5584715, EPI_ISL_5584716, EPI_ISL_5584717, EPI_ISL_5584718, EPI_ISL_5584719, EPI_ISL_5584720, EPI_ISL_5584721, EPI_ISL_5584722, EPI_ISL_5584723, EPI_ISL_5584724, EPI_ISL_5584725, EPI_ISL_5584727, EPI_ISL_5584728, EPI_ISL_5584729, EPI_ISL_5584730, EPI_ISL_5584731, EPI_ISL_5584732, EPI_ISL_5584733, EPI_ISL_5584734, EPI_ISL_5584735, EPI_ISL_5584736, EPI_ISL_5584737, EPI_ISL_5584738                                                                                                                                                                                                                                                                                                                                                                                                                                                                                                                                                                                                                                                                                                                                                                                                                                                                                                                                                                                                                                                                                                                                                                                                                                                                                                                                                                                                                                                                                                                                                                                                                                                                                                                                                                                                                                                                                                                                                                                                                                                                                                                                                                                                                                                                                                                                                                                                                                                                                                                                                                                                                                                                                                                                                                                                                                                                                                                                                                                                                                                                                                                                                                                                                                                                                                                                                                                                                                                                                                                                                                                                                                                                                                                                                                                                                                                                                                                                                                                                                    | see above                                                                                                  | URMC LABS                                                                                                            | URMC LABS                                                                                                                                                                                                                   |
| EPI_ISL_5602321, EPI_ISL_5602322, EPI_ISL_5602323, EPI_ISL_5602324                                                                                                                                                                                                                                                                                                                                                                                                                                                                                                                                                                                                                                                                                                                                                                                                                                                                                                                                                                                                                                                                                                                                                                                                                                                                                                                                                                                                                                                                                                                                                                                                                                                                                                                                                                                                                                                                                                                                                                                                                                                                                                                                                                                                                                                                                                                                                                                                                                                                                                                                                                                                                                                                                                                                                                                                                                                                                                                                                                                                                                                                                                                                                                                                                                                                                                                                                                                                                                                                                                                                                                                                                                                                                                                                                                                                                                                                                                                                                                                                                                                                                                                                                                                                                                                                                                                                                                                                                                                                                                                                                                                                                                                                                                                                                                                                                                                                                                                                                                                                                                                                                                                                                                                                                                                                                                                                                                                 | US Air Force School of Aerospace Medicine                                                                  | US Air Force School of Aerospace Medicine                                                                            | Anthony Fries; Carol Garrett; Clarise Starr; Cole Anderson; Deanna Muehleman; Elizabeth Macias; Fritz Castillo; Jennifer Black; Jennifer Meyer; Kelsey Lanter; Sarah Purves; William Gruner                                 |
| EPI_ISL_5594262, EPI_ISL_5594264, EPI_ISL_5594268, EPI_ISL_5594270, EPI_ISL_5594271, EPI_ISL_5594272, EPI_ISL_5594275, EPI_ISL_5594276, EPI_ISL_5594280, EPI_ISL_5594281, EPI_ISL_5594282, EPI_ISL_5594283, EPI_ISL_5594284, EPI_ISL_5594285, EPI_ISL_5594286, EPI_ISL_5594287, EPI_ISL_5594288, EPI_ISL_5594289, EPI_ISL_5594290, EPI_ISL_5594291, EPI_ISL_5594292, EPI_ISL_5594293, EPI_ISL_5594294, EPI_ISL_5594295, EPI_ISL_5594296, EPI_ISL_5594297, EPI_ISL_5594298, EPI_ISL_5594299, EPI_ISL_5594300, EPI_ISL_5594301, EPI_ISL_5594302, EPI_ISL_5594303, EPI_ISL_5594304, EPI_ISL_5594305, EPI_ISL_5594306, EPI_ISL_5594312, EPI_ISL_5594313, EPI_ISL_5594316, EPI_ISL_5594318, EPI_ISL_5594319, EPI_ISL_5594321, EPI_ISL_5594320, EPI_ISL_5594322, EPI_ISL_5594323, EPI_ISL_5594324, EPI_ISL_5594325, EPI_ISL_5594326, EPI_ISL_5594327, EPI_ISL_5594328, EPI_ISL_5594329, EPI_ISL_5594330, EPI_ISL_5594331, EPI_ISL_5594332, EPI_ISL_5594333, EPI_ISL_5594334, EPI_ISL_5594335, EPI_ISL_5594336, EPI_ISL_5594337, EPI_ISL_5594338, EPI_ISL_5594339, EPI_ISL_5594340, EPI_ISL_5594341, EPI_ISL_5594342, EPI_ISL_5594343, EPI_ISL_5594344, EPI_ISL_5594345, EPI_ISL_5594346, EPI_ISL_5594356, EPI_ISL_5594357, EPI_ISL_5594360, EPI_ISL_5594363, EPI_ISL_5594364, EPI_ISL_5594365, EPI_ISL_5594366, EPI_ISL_5594367, EPI_ISL_5594368, EPI_ISL_5594369, EPI_ISL_5594370, EPI_ISL_5594371, EPI_ISL_5594372, EPI_ISL_5594373, EPI_ISL_5594374, EPI_ISL_5594375, EPI_ISL_5594376, EPI_ISL_5594377, EPI_ISL_5594378, EPI_ISL_5594379, EPI_ISL_5594380, EPI_ISL_5594381, EPI_ISL_5594382, EPI_ISL_5594383, EPI_ISL_5594384, EPI_ISL_5594385, EPI_ISL_5594386, EPI_ISL_5594387, EPI_ISL_5594388, EPI_ISL_5594389, EPI_ISL_5594390, EPI_ISL_5594391, EPI_ISL_5594392, EPI_ISL_5594393, EPI_ISL_5594394, EPI_ISL_5594395, EPI_ISL_5594396, EPI_ISL_5594397, EPI_ISL_5594398, EPI_ISL_5594399, EPI_ISL_5594400, EPI_ISL_5594401, EPI_ISL_5594402, EPI_ISL_5594403, EPI_ISL_5594404, EPI_ISL_5594405, EPI_ISL_5594406, EPI_ISL_5594407, EPI_ISL_5594408, EPI_ISL_5594409, EPI_ISL_5594410, EPI_ISL_5594411, EPI_ISL_5594412, EPI_ISL_5594413, EPI_ISL_5594414, EPI_ISL_5594415, EPI_ISL_5594416, EPI_ISL_5594417, EPI_ISL_5594418, EPI_ISL_5594419, EPI_ISL_5594420, EPI_ISL_5594421, EPI_ISL_5594422, EPI_ISL_5594423, EPI_ISL_5594424, EPI_ISL_5594425, EPI_ISL_5594426, EPI_ISL_5594427, EPI_ISL_5594428, EPI_ISL_5594429, EPI_ISL_5594430, EPI_ISL_5594431, EPI_ISL_5594432, EPI_ISL_5594433, EPI_ISL_5594434, EPI_ISL_5594435, EPI_ISL_5594436, EPI_ISL_5594437, EPI_ISL_5594438, EPI_ISL_5594439, EPI_ISL_5594440, EPI_ISL_5594441, EPI_ISL_5594442, EPI_ISL_5594443, EPI_ISL_5594444, EPI_ISL_5594445, EPI_ISL_5594446, EPI_ISL_5594447, EPI_ISL_5594448, EPI_ISL_5594449, EPI_ISL_5594450, EPI_ISL_5594451, EPI_ISL_5594452, EPI_ISL_5594453, EPI_ISL_5594454, EPI_ISL_5594455, EPI_ISL_5594456, EPI_ISL_5594457, EPI_ISL_5594458, EPI_ISL_5594459, EPI_ISL_5594460, EPI_ISL_5594461, EPI_ISL_5594462, EPI_ISL_5594463, EPI_ISL_5594464, EPI_ISL_5594465, EPI_ISL_5594466, EPI_ISL_5594467, EPI_ISL_5594468, EPI_ISL_5594469, EPI_ISL_5594470, EPI_ISL_5594471, EPI_ISL_5594472, EPI_ISL_5594473, EPI_ISL_5594474, EPI_ISL_5594475, EPI_ISL_5594476, EPI_ISL_5594477, EPI_ISL_5594478, EPI_ISL_5594479, EPI_ISL_5594480, EPI_ISL_5594481, EPI_ISL_5594482, EPI_ISL_5594483, EPI_ISL_5594484, EPI_ISL_5594485, EPI_ISL_5594486, EPI_ISL_5594487, EPI_ISL_5594488, EPI_ISL_5594489, EPI_ISL_5594490, EPI_ISL_5594491, EPI_ISL_5594492, EPI_ISL_5594493, EPI_ISL_5594494, EPI_ISL_5594495, EPI_ISL_5594496, EPI_ISL_5594497, EPI_ISL_5594498, EPI_ISL_5594499, EPI_ISL_5594500, EPI_ISL_5594501, EPI_ISL_5594502, EPI_ISL_5594503, EPI_ISL_5594504, EPI_ISL_5594505, EPI_ISL_5594506, EPI_ISL_5594507, EPI_ISL_5594508, EPI_ISL_5594509, EPI_ISL_5594510, EPI_ISL_5594511, EPI_ISL_5594512, EPI_ISL_5594513, EPI_ISL_5594514, EPI_ISL_5594515, EPI_ISL_5594516, EPI_ISL_5594517, EPI_ISL_5594518, EPI_ISL_5594519, EPI_ISL_5594520, EPI_ISL_5594521, EPI_ISL_5594522, EPI_ISL_5594523, EPI_ISL_5594524, EPI_ISL_5594525, EPI_ISL_5594526, EPI_ISL_5594527, EPI_ISL_5594528, EPI_ISL_5594529, EPI_ISL_5594530, EPI_ISL_5594531, EPI_ISL_5594532, EPI_ISL_5594533, EPI_ISL_5594534, EPI_ISL_5594535, EPI_ISL_5594536, EPI_ISL_5594537, EPI_ISL_5594538, EPI_ISL_5594539, EPI_ISL_5594540, EPI_ISL_5594541, EPI_ISL_5594542, EPI_ISL_5594543, EPI_ISL_5594544, EPI_ISL_5594545, EPI_ISL_5594546, EPI_ISL_5594547, EPI_ISL_5594548, EPI_ISL_5594549, EPI_ISL_5594550, EPI_ISL_5594551, EPI_ISL_5594552, EPI_ISL_5594553, EPI_ISL_5594554, EPI_ISL_5594555, EPI_ISL_5594556, EPI_ISL_5594557, EPI_ISL_5594558, EPI_ISL_5594559, EPI_ISL_5594560, EPI_ISL_5594561, EPI_ISL_5594562, EPI_ISL_5594563, EPI_ISL_5594564, EPI_ISL_5594565, EPI_ISL_5594566, EPI_ISL_5594567, EPI_ISL_5594568, EPI_ISL_5594569, EPI_ISL_5594570, EPI_ISL_5594571, EPI_ISL_5594572, EPI_ISL_5594573, EPI_ISL_5594574, EPI_ISL_5594575, EPI_ISL_5594576, EPI_ISL_5594577, EPI_ISL_5594578, EPI_ISL_5594579, EPI_ISL_5594580, EPI_ISL_5594581, EPI_ISL_5594582, EPI_ISL_5594583, EPI_ISL_5594584, EPI_ISL_5594585, EPI_ISL_5594586, EPI_ISL_5594587, EPI_ISL_5594588, EPI_ISL_5594589, EPI_ISL_5594590, EPI_ISL_5594591, EPI_ISL_5594592, EPI_ISL_5594593, EPI_ISL_5594594, EPI_ISL_5594595, EPI_ISL_5594596, EPI_ISL_5594597, EPI_ISL_5594598, EPI_ISL_5594599, EPI_ISL_5594600 | see above                                                                                                  | UW Virology Lab                                                                                                      | UW Virology Lab                                                                                                                                                                                                             |
| EPI_ISL_5591013, EPI_ISL_5591024, EPI_ISL_5591025, EPI_ISL_5591027, EPI_ISL_5591029, EPI_ISL_5591030, EPI_ISL_5591032, EPI_ISL_5593623, EPI_ISL_5593630, EPI_ISL_5593651, EPI_ISL_5593657, EPI_ISL_5593703, EPI_ISL_5593721, EPI_ISL_5593727, EPI_ISL_5593760, EPI_ISL_5593806                                                                                                                                                                                                                                                                                                                                                                                                                                                                                                                                                                                                                                                                                                                                                                                                                                                                                                                                                                                                                                                                                                                                                                                                                                                                                                                                                                                                                                                                                                                                                                                                                                                                                                                                                                                                                                                                                                                                                                                                                                                                                                                                                                                                                                                                                                                                                                                                                                                                                                                                                                                                                                                                                                                                                                                                                                                                                                                                                                                                                                                                                                                                                                                                                                                                                                                                                                                                                                                                                                                                                                                                                                                                                                                                                                                                                                                                                                                                                                                                                                                                                                                                                                                                                                                                                                                                                                                                                                                                                                                                                                                                                                                                                                                                                                                                                                                                                                                                                                                                                                                                                                                                                                     | see above                                                                                                  | University of Iowa Hospitals and Clinics                                                                             | State Hygienic Laboratory at the University of Iowa                                                                                                                                                                         |
| EPI_ISL_5584414, EPI_ISL_5584415, EPI_ISL_5584416, EPI_ISL_5584417, EPI_ISL_5584418, EPI_ISL_5584419, EPI_ISL_5584421, EPI_ISL_5584422, EPI_ISL_5584423, EPI_ISL_5584425, EPI_ISL_5584426, EPI_ISL_5584427, EPI_ISL_5584428, EPI_ISL_5584429, EPI_ISL_5584430, EPI_ISL_5584431, EPI_ISL_5584432, EPI_ISL_5584433, EPI_ISL_5584434, EPI_ISL_5584435, EPI_ISL_5584436, EPI_ISL_5584437, EPI_ISL_5584438, EPI_ISL_5584439, EPI_ISL_5584440, EPI_ISL_5584441, EPI_ISL_5595523, EPI_ISL_5595524, EPI_ISL_5595525, EPI_ISL_5595526, EPI_ISL_5595527, EPI_ISL_5595528, EPI_ISL_5595529, EPI_ISL_5595530, EPI_ISL_5595531, EPI_ISL_5595532, EPI_ISL_5595533, EPI_ISL_5595534, EPI_ISL_5595535, EPI_ISL_5595536, EPI_ISL_5595537, EPI_ISL_5595538, EPI_ISL_5595539, EPI_ISL_5595540, EPI_ISL_5595541, EPI_ISL_5595542, EPI_ISL_5595543, EPI_ISL_5595544, EPI_ISL_5595545, EPI_ISL_5595546, EPI_ISL_5595547, EPI_ISL_5595548, EPI_ISL_5595549, EPI_ISL_5595550, EPI_ISL_5595551, EPI_ISL_5595552, EPI_ISL_5595553, EPI_ISL_5595554, EPI_ISL_5595555, EPI_ISL_5595556, EPI_ISL_5595557, EPI_ISL_5595558, EPI_ISL_5595559, EPI_ISL_5595560, EPI_ISL_5595561, EPI_ISL_5595562, EPI_ISL_5595563, EPI_ISL_5595564, EPI_ISL_5595565, EPI_ISL_5595566, EPI_ISL_5595567, EPI_ISL_5595568, EPI_ISL_5595569, EPI_ISL_5595570, EPI_ISL_5595571, EPI_ISL_5595572, EPI                                                                                                                                                                                                                                                                                                                                                                                                                                                                                                                                                                                                                                                                                                                                                                                                                                                                                                                                                                                                                                                                                                                                                                                                                                                                                                                                                                                                                                                                                                                                                                                                                                                                                                                                                                                                                                                                                                                                                                                                                                                                                                                                                                                                                                                                                                                                                                                                                                                                                                                                                                                                                                                                                                                                                                                                                                                                                                                                                                                                                                                                                                                                                                                                                                                                                                                                                                                                                                                                                                                                                                                                                                                                                                                                                                                                                                                                                                                                                                                                                                                                                                    |                                                                                                            |                                                                                                                      |                                                                                                                                                                                                                             |

|                                                                                                                                                                                                                                                                                                                                                                                                                                                                                                                                                                                                                                                                                                                                                                                                                                                                                                                                                                                                                                                                                                                                                                                                                                                                                                                                                                                                                                                                                                                                                                                                                                                                                                                                                                                                                                                                                                            |                                                                   |                                                                                                                      |                                                                                                                           |
|------------------------------------------------------------------------------------------------------------------------------------------------------------------------------------------------------------------------------------------------------------------------------------------------------------------------------------------------------------------------------------------------------------------------------------------------------------------------------------------------------------------------------------------------------------------------------------------------------------------------------------------------------------------------------------------------------------------------------------------------------------------------------------------------------------------------------------------------------------------------------------------------------------------------------------------------------------------------------------------------------------------------------------------------------------------------------------------------------------------------------------------------------------------------------------------------------------------------------------------------------------------------------------------------------------------------------------------------------------------------------------------------------------------------------------------------------------------------------------------------------------------------------------------------------------------------------------------------------------------------------------------------------------------------------------------------------------------------------------------------------------------------------------------------------------------------------------------------------------------------------------------------------------|-------------------------------------------------------------------|----------------------------------------------------------------------------------------------------------------------|---------------------------------------------------------------------------------------------------------------------------|
| EPI_ISL_6601931                                                                                                                                                                                                                                                                                                                                                                                                                                                                                                                                                                                                                                                                                                                                                                                                                                                                                                                                                                                                                                                                                                                                                                                                                                                                                                                                                                                                                                                                                                                                                                                                                                                                                                                                                                                                                                                                                            | Viesioji istaiga Klaipėdos universitetinė ligoninė                | National Public Health Surveillance Laboratory                                                                       | Ana Steponkiene; Danas Baksa; Jelena Razmuk; Lukas Vasionis; Lukas Zemaitis; Migle Gabrielaite; Svajune Muralyte          |
| EPI_ISL_6601629, EPI_ISL_6601655, EPI_ISL_6601677, EPI_ISL_6602045, EPI_ISL_6602048, EPI_ISL_6602050, EPI_ISL_6602054, EPI_ISL_6602055, EPI_ISL_6602056, EPI_ISL_6602065, EPI_ISL_6602066, EPI_ISL_6602072, EPI_ISL_6602073, EPI_ISL_6602077, EPI_ISL_6602080, EPI_ISL_6602082, EPI_ISL_6602083, EPI_ISL_6602091, EPI_ISL_6602092, EPI_ISL_6602103, EPI_ISL_6602105, EPI_ISL_6602106, EPI_ISL_6602107, EPI_ISL_6602109, EPI_ISL_6602112, EPI_ISL_6602124, EPI_ISL_6602127, EPI_ISL_6602128, EPI_ISL_6602129, EPI_ISL_6602133, EPI_ISL_6602141, EPI_ISL_6602145, EPI_ISL_6602147, EPI_ISL_6602149, EPI_ISL_6602150, EPI_ISL_6602151, EPI_ISL_6602157, EPI_ISL_6602159, EPI_ISL_6602173, EPI_ISL_6602174, EPI_ISL_6602175, EPI_ISL_6602191, EPI_ISL_6602192, EPI_ISL_6602209, EPI_ISL_6602217, EPI_ISL_6602223                                                                                                                                                                                                                                                                                                                                                                                                                                                                                                                                                                                                                                                                                                                                                                                                                                                                                                                                                                                                                                                                                               | Viesioji istaiga Vilniaus universiteto ligoninė Santaros Klinikos | Vilnius University Hospital Santaros Klinikos, Center of Laboratory Medicine                                         | Daniel Naumovas; Dovile Juozapaitė; Gytis Dudas; Ingrida Olendraite; Ligita Raugaite; Monika Katenaite; Rimvydas Norvilas |
| EPI_ISL_6586193                                                                                                                                                                                                                                                                                                                                                                                                                                                                                                                                                                                                                                                                                                                                                                                                                                                                                                                                                                                                                                                                                                                                                                                                                                                                                                                                                                                                                                                                                                                                                                                                                                                                                                                                                                                                                                                                                            | Virtus Diagnostics - IVFAustralia                                 | NSW Health Pathology - Institute of Clinical Pathology and Medical Research; Westmead Hospital; University of Sydney | Arnott A.; Draper J.; Gall M.; Martinez E.; Rockett R.; Sintchenko V.; on behalf of ICPMR                                 |
| EPI_ISL_6585452, EPI_ISL_6585454, EPI_ISL_6585456, EPI_ISL_6585460, EPI_ISL_6585461, EPI_ISL_6585465, EPI_ISL_6585466, EPI_ISL_6585467, EPI_ISL_6585469, EPI_ISL_6585471, EPI_ISL_6585472, EPI_ISL_6585474, EPI_ISL_6585475, EPI_ISL_6585476, EPI_ISL_6585478, EPI_ISL_6585485, EPI_ISL_6585486, EPI_ISL_6585487, EPI_ISL_6585489, EPI_ISL_6585492, EPI_ISL_6585495, EPI_ISL_6585497, EPI_ISL_6585499, EPI_ISL_6585500, EPI_ISL_6585501, EPI_ISL_6585502, EPI_ISL_6585503, EPI_ISL_6585505, EPI_ISL_6585508, EPI_ISL_6585510, EPI_ISL_6585515, EPI_ISL_6585517, EPI_ISL_6585520, EPI_ISL_6585524, EPI_ISL_6587913, EPI_ISL_6587915                                                                                                                                                                                                                                                                                                                                                                                                                                                                                                                                                                                                                                                                                                                                                                                                                                                                                                                                                                                                                                                                                                                                                                                                                                                                         | Wake Forest School of Medicine, Internal Medicine                 | Wake Forest School of Medicine, Internal Medicine                                                                    | Gregory Hawkins; Kimberly Reeves                                                                                          |
| EPI_ISL_6589463, EPI_ISL_6589474, EPI_ISL_6589476, EPI_ISL_6589478, EPI_ISL_6589481, EPI_ISL_6589485, EPI_ISL_6589491, EPI_ISL_6589498, EPI_ISL_6589513, EPI_ISL_6589534                                                                                                                                                                                                                                                                                                                                                                                                                                                                                                                                                                                                                                                                                                                                                                                                                                                                                                                                                                                                                                                                                                                                                                                                                                                                                                                                                                                                                                                                                                                                                                                                                                                                                                                                   | ZLC Zentrallabor Chur                                             | Microbiology Dr. Risch Buchs                                                                                         | Dominique Fabien Hilti; Faina Wehrli; Lorenz Risch; Martin Risch; Nadia Wohlwend; Sinem Kas; Thomas Bodmer                |
| EPI_ISL_6590629                                                                                                                                                                                                                                                                                                                                                                                                                                                                                                                                                                                                                                                                                                                                                                                                                                                                                                                                                                                                                                                                                                                                                                                                                                                                                                                                                                                                                                                                                                                                                                                                                                                                                                                                                                                                                                                                                            | Zakład Diagnostyki Laboratoryjnej                                 | Wojewodzka Stacja Sanitarно-Epidemiologiczna w Gorzowie Wielkopolskim                                                | Elzbieta Justynska; Klaudia Kobendza-Wlodarczak; Patrycja Faberska and Marek Margol; Renata Siegel                        |
| EPI_ISL_6590761                                                                                                                                                                                                                                                                                                                                                                                                                                                                                                                                                                                                                                                                                                                                                                                                                                                                                                                                                                                                                                                                                                                                                                                                                                                                                                                                                                                                                                                                                                                                                                                                                                                                                                                                                                                                                                                                                            | Zakład Diagnostyki Laboratoryjnej SPWSZ w Szczecinie              | Wojewodzka Stacja Sanitarно-Epidemiologiczna w Gorzowie Wielkopolskim                                                | Elzbieta Justynska; Klaudia Kobendza-Wlodarczak; Patrycja Faberska and Marek Margol; Renata Siegel                        |
| EPI_ISL_6591097, EPI_ISL_6591098, EPI_ISL_6591099, EPI_ISL_6591100, EPI_ISL_6591101, EPI_ISL_6591102, EPI_ISL_6591103, EPI_ISL_6591105, EPI_ISL_6591106, EPI_ISL_6591107, EPI_ISL_6591109, EPI_ISL_6591111, EPI_ISL_6591113, EPI_ISL_6594420, EPI_ISL_6594421, EPI_ISL_6594422, EPI_ISL_6594423, EPI_ISL_6594424, EPI_ISL_6594425, EPI_ISL_6594426, EPI_ISL_6596218, EPI_ISL_6596219, EPI_ISL_6596220, EPI_ISL_6596221, EPI_ISL_6596222, EPI_ISL_6596223, EPI_ISL_6596224, EPI_ISL_6596225, EPI_ISL_6596226, EPI_ISL_6596227, EPI_ISL_6596228, EPI_ISL_6596229, EPI_ISL_6596230, EPI_ISL_6596231, EPI_ISL_6596232, EPI_ISL_6596233, EPI_ISL_6596234, EPI_ISL_6596235, EPI_ISL_6596236, EPI_ISL_6596237, EPI_ISL_6596300, EPI_ISL_6596308                                                                                                                                                                                                                                                                                                                                                                                                                                                                                                                                                                                                                                                                                                                                                                                                                                                                                                                                                                                                                                                                                                                                                                   | Zavod za javno zdravstvo Dubrovačko-Neretvanske županije          | Hrvatski zavod za javno zdravstvo                                                                                    | Anita Jurić; Dragan Jurić; Irena Tabain; Ivana Ferenčak; Josipa Kuzle                                                     |
| EPI_ISL_6596316, EPI_ISL_6596317, EPI_ISL_6596318, EPI_ISL_6596319, EPI_ISL_6596320, EPI_ISL_6596321, EPI_ISL_6596322, EPI_ISL_6596323, EPI_ISL_6596324, EPI_ISL_6596325, EPI_ISL_6596326, EPI_ISL_6596327, EPI_ISL_6596328, EPI_ISL_6596408, EPI_ISL_6596409, EPI_ISL_6596455, EPI_ISL_6596456                                                                                                                                                                                                                                                                                                                                                                                                                                                                                                                                                                                                                                                                                                                                                                                                                                                                                                                                                                                                                                                                                                                                                                                                                                                                                                                                                                                                                                                                                                                                                                                                            | Zavod za javno zdravstvo Karlovačke županije                      | Hrvatski zavod za javno zdravstvo                                                                                    | Anita Jurić; Dragan Jurić; Irena Tabain; Ivana Ferenčak; Josipa Kuzle                                                     |
| EPI_ISL_6594371, EPI_ISL_6594372, EPI_ISL_6594373, EPI_ISL_6594375, EPI_ISL_6594376, EPI_ISL_6594377, EPI_ISL_6594379, EPI_ISL_6594380, EPI_ISL_6594381, EPI_ISL_6594382, EPI_ISL_6594383, EPI_ISL_6594384, EPI_ISL_6594385, EPI_ISL_6594387, EPI_ISL_6594388, EPI_ISL_6594389, EPI_ISL_6594390, EPI_ISL_6594391, EPI_ISL_6594392, EPI_ISL_6594393, EPI_ISL_6594394, EPI_ISL_6594395, EPI_ISL_6594396, EPI_ISL_6594397, EPI_ISL_6594398, EPI_ISL_6594399, EPI_ISL_6594400, EPI_ISL_6594401, EPI_ISL_6594402, EPI_ISL_6594403, EPI_ISL_6594404, EPI_ISL_6594406, EPI_ISL_6594408, EPI_ISL_6594409, EPI_ISL_6594410, EPI_ISL_6594411, EPI_ISL_6594412, EPI_ISL_6594415, EPI_ISL_6594416, EPI_ISL_6594417, EPI_ISL_6594419, EPI_ISL_6594420, EPI_ISL_6596238, EPI_ISL_6596239, EPI_ISL_6596240, EPI_ISL_6596241, EPI_ISL_6596242, EPI_ISL_6596243, EPI_ISL_6596244, EPI_ISL_6596245, EPI_ISL_6596246, EPI_ISL_6596247, EPI_ISL_6596248, EPI_ISL_6596249, EPI_ISL_6596250, EPI_ISL_6596251, EPI_ISL_6596252, EPI_ISL_6596253, EPI_ISL_6596254, EPI_ISL_6596255, EPI_ISL_6596256, EPI_ISL_6596257, EPI_ISL_6596258, EPI_ISL_6596259, EPI_ISL_6596260, EPI_ISL_6596261, EPI_ISL_6596262, EPI_ISL_6596263, EPI_ISL_6596264, EPI_ISL_6596265, EPI_ISL_6596266, EPI_ISL_6596267, EPI_ISL_6596268, EPI_ISL_6596269, EPI_ISL_6596270, EPI_ISL_6596271, EPI_ISL_6596272, EPI_ISL_6596273, EPI_ISL_6596274, EPI_ISL_6596275, EPI_ISL_6596276, EPI_ISL_6596277, EPI_ISL_6596278, EPI_ISL_6596279, EPI_ISL_6596280, EPI_ISL_6596281, EPI_ISL_6596282, EPI_ISL_6596283, EPI_ISL_6596284, EPI_ISL_6596285, EPI_ISL_6596286, EPI_ISL_6596287, EPI_ISL_6596288, EPI_ISL_6596289, EPI_ISL_6596290, EPI_ISL_6596291, EPI_ISL_6596292, EPI_ISL_6596293, EPI_ISL_6596294, EPI_ISL_6596295, EPI_ISL_6596296, EPI_ISL_6596297, EPI_ISL_6596298, EPI_ISL_6596302, EPI_ISL_6596303, EPI_ISL_6596304, EPI_ISL_6596310, EPI_ISL_6596311 | Zavod za javno zdravstvo Medimurske županije                      | Hrvatski zavod za javno zdravstvo                                                                                    | Anita Jurić; Dragan Jurić; Irena Tabain; Ivana Ferenčak; Josipa Kuzle                                                     |
| EPI_ISL_6594467, EPI_ISL_6594468, EPI_ISL_6594469, EPI_ISL_6594470, EPI_ISL_6594471, EPI_ISL_6594472, EPI_ISL_6594473, EPI_ISL_6594474, EPI_ISL_6594475, EPI_ISL_6594476, EPI_ISL_6594477, EPI_ISL_6594478, EPI_ISL_6594479, EPI_ISL_6594480, EPI_ISL_6594481, EPI_ISL_6594482, EPI_ISL_6594483, EPI_ISL_6594484, EPI_ISL_6594485, EPI_ISL_6594486, EPI_ISL_6594487, EPI_ISL_6594488, EPI_ISL_6594489, EPI_ISL_6594490, EPI_ISL_6594491, EPI_ISL_6594492, EPI_ISL_6594493, EPI_ISL_6594494, EPI_ISL_6594495, EPI_ISL_6594498, EPI_ISL_6594499, EPI_ISL_6594500, EPI_ISL_6594501, EPI_ISL_6594502, EPI_ISL_6594503, EPI_ISL_6594504, EPI_ISL_6594506, EPI_ISL_6594507, EPI_ISL_6594508, EPI_ISL_6594509, EPI_ISL_6594510, EPI_ISL_6594511, EPI_ISL_6594512, EPI_ISL_6594513, EPI_ISL_6594514, EPI_ISL_6594515, EPI_ISL_6594516, EPI_ISL_6594517, EPI_ISL_6594518, EPI_ISL_6594519, EPI_ISL_6594520, EPI_ISL_6594521, EPI_ISL_6594522, EPI_ISL_6594523, EPI_ISL_6594524, EPI_ISL_6594525                                                                                                                                                                                                                                                                                                                                                                                                                                                                                                                                                                                                                                                                                                                                                                                                                                                                                                                     | Zavod za javno zdravstvo Osječko-Baranjske županije               | Hrvatski zavod za javno zdravstvo                                                                                    | Anita Jurić; Dragan Jurić; Irena Tabain; Ivana Ferenčak; Josipa Kuzle                                                     |
| EPI_ISL_6596331, EPI_ISL_6596332, EPI_ISL_6596333, EPI_ISL_6596334, EPI_ISL_6596335, EPI_ISL_6596336, EPI_ISL_6596340, EPI_ISL_6596341, EPI_ISL_6596342, EPI_ISL_6596343, EPI_ISL_6596344, EPI_ISL_6596346, EPI_ISL_6596347, EPI_ISL_6596348, EPI_ISL_6596349, EPI_ISL_6596350, EPI_ISL_6596351, EPI_ISL_6596352, EPI_ISL_6596353, EPI_ISL_6596354, EPI_ISL_6596355, EPI_ISL_6596356, EPI_ISL_6596357, EPI_ISL_6596358, EPI_ISL_6596361, EPI_ISL_6596362, EPI_ISL_6596363, EPI_ISL_6596364, EPI_ISL_6596365, EPI_ISL_6596366, EPI_ISL_6596367, EPI_ISL_6596368, EPI_ISL_6596369, EPI_ISL_6596370, EPI_ISL_6596371, EPI_ISL_6596372, EPI_ISL_6596373, EPI_ISL_6596374, EPI_ISL_6596375, EPI_ISL_6596376, EPI_ISL_6596377, EPI_ISL_6596379, EPI_ISL_6596380, EPI_ISL_6596381, EPI_ISL_6596382, EPI_ISL_6596383, EPI_ISL_6596384, EPI_ISL_6596385, EPI_ISL_6596386, EPI_ISL_6596387, EPI_ISL_6596388, EPI_ISL_6596389, EPI_ISL_6596390, EPI_ISL_6596391, EPI_ISL_6596392, EPI_ISL_6596393, EPI_ISL_6596395, EPI_ISL_6596396, EPI_ISL_6596397, EPI_ISL_6596398, EPI_ISL_6596399, EPI_ISL_6596401, EPI_ISL_6596402, EPI_ISL_6596403, EPI_ISL_6596407                                                                                                                                                                                                                                                                                                                                                                                                                                                                                                                                                                                                                                                                                                                                                            | Zavod za javno zdravstvo Varaždinske županije                     | Hrvatski zavod za javno zdravstvo                                                                                    | Anita Jurić; Dragan Jurić; Irena Tabain; Ivana Ferenčak; Josipa Kuzle                                                     |
| EPI_ISL_6596299, EPI_ISL_6596329, EPI_ISL_6596330                                                                                                                                                                                                                                                                                                                                                                                                                                                                                                                                                                                                                                                                                                                                                                                                                                                                                                                                                                                                                                                                                                                                                                                                                                                                                                                                                                                                                                                                                                                                                                                                                                                                                                                                                                                                                                                          | Zavod za javno zdravstvo Zadarske županije                        | Hrvatski zavod za javno zdravstvo                                                                                    | Anita Jurić; Dragan Jurić; Irena Tabain; Ivana Ferenčak; Josipa Kuzle                                                     |
| EPI_ISL_6594598, EPI_ISL_6594599, EPI_ISL_6594600, EPI_ISL_6594601, EPI_ISL_6594602, EPI_ISL_6594603, EPI_ISL_6594604, EPI_ISL_6594605, EPI_ISL_6594606, EPI_ISL_6594607, EPI_ISL_6594608, EPI_ISL_6594609, EPI_ISL_6594610, EPI_ISL_6594611, EPI_ISL_6594612, EPI_ISL_6594613, EPI_ISL_6594614, EPI_ISL_6594615, EPI_ISL_6594616, EPI_ISL_6594617, EPI_ISL_6594618, EPI_ISL_6594619, EPI_ISL_6594620, EPI_ISL_6594621, EPI_ISL_6594622, EPI_ISL_6594623, EPI_ISL_6594624, EPI_ISL_6594625, EPI_ISL_6594626, EPI_ISL_6594627, EPI_ISL_6594628, EPI_ISL_6594629, EPI_ISL_6594630, EPI_ISL_6594631, EPI_ISL_6594632, EPI_ISL_6594633, EPI_ISL_6594634, EPI_ISL_6594635, EPI_ISL_6594636, EPI_ISL_6594637, EPI_ISL_6594638, EPI_ISL_6594639, EPI_ISL_6594640, EPI_ISL_6594641, EPI_ISL_6594642, EPI_ISL_6594643, EPI_ISL_6594644, EPI_ISL_6594645, EPI_ISL_6594646, EPI_ISL_6594647, EPI_ISL_6594648, EPI_ISL_6594649, EPI_ISL_6594650, EPI_ISL_6594651, EPI_ISL_6594652, EPI_ISL_6594653, EPI_ISL_6594654, EPI_ISL_6594655, EPI_ISL_6594656, EPI_ISL_6594657, EPI_ISL_6594658, EPI_ISL_6594659, EPI_ISL_6594660, EPI_ISL_6594661, EPI_ISL_6594662, EPI_ISL_6594663, EPI_ISL_6594664, EPI_ISL_6594665, EPI_ISL_6594666, EPI_ISL_6594667, EPI_ISL_6594668, EPI_ISL_6594669, EPI_ISL_6594670, EPI_ISL_6594671, EPI_ISL_6594672, EPI_ISL_6594673, EPI_ISL_6594674, EPI_ISL_6594675, EPI_ISL_6594676, EPI_ISL_6594677, EPI_ISL_6594678, EPI_ISL_6594679, EPI_ISL_6594680, EPI_ISL_6594681, EPI_ISL_6594682, EPI_ISL_6594683, EPI_ISL_6594684, EPI_ISL_6594685, EPI_ISL_6594686                                                                                                                                                                                                                                                                                                                                    | Zavod za javno zdravstvo Zagrebačke županije                      | Hrvatski zavod za javno zdravstvo                                                                                    | Anita Jurić; Dragan Jurić; Irena Tabain; Ivana Ferenčak; Josipa Kuzle                                                     |
| EPI_ISL_6594526, EPI_ISL_6594527, EPI_ISL_6594528, EPI_ISL_6594529, EPI_ISL_6594530, EPI_ISL_6594531, EPI_ISL_6594532, EPI_ISL_6594533, EPI_ISL_6594534, EPI_ISL_6594535, EPI_ISL_6594536, EPI_ISL_6594537, EPI_ISL_6594538, EPI_ISL_6594539, EPI_ISL_6594540, EPI_ISL_6594541, EPI_ISL_6594542, EPI_ISL_6594543, EPI_ISL_6594544, EPI_ISL_6594545, EPI_ISL_6594546, EPI_ISL_6594547, EPI_ISL_6594548, EPI_ISL_6594549, EPI_ISL_6594550, EPI_ISL_6594551, EPI_ISL_6594552, EPI_ISL_6594553, EPI_ISL_6594554, EPI_ISL_6594555, EPI_ISL_6594556, EPI_ISL_6594557, EPI_ISL_6594558, EPI_ISL_6594559, EPI_ISL_6594560, EPI_ISL_6594561, EPI_ISL_6594562, EPI_ISL_6594563, EPI_ISL_6594564, EPI_ISL_6594565, EPI_ISL_6594566, EPI_ISL_6594567, EPI_ISL_6594568, EPI_ISL_6594569, EPI_ISL_6594570, EPI_ISL_6594571, EPI_ISL_6594572, EPI_ISL_6594573, EPI_ISL_6594574, EPI_ISL_6594575, EPI_ISL_6594576, EPI_ISL_6594577, EPI_ISL_6594578, EPI_ISL_6594579, EPI_ISL_6594580, EPI_ISL_6594581, EPI_ISL_6594582, EPI_ISL_6594583, EPI_ISL_6594584, EPI_ISL_6594585, EPI_ISL_6594586, EPI_ISL_6594587, EPI_ISL_6594588, EPI_ISL_6594589, EPI_ISL_6594590, EPI_ISL_6594591, EPI_ISL_6594592, EPI_ISL_6594593, EPI_ISL_6594594, EPI_ISL_6594595, EPI_ISL_6594596                                                                                                                                                                                                                                                                                                                                                                                                                                                                                                                                                                                                                                                      | Zavod za javno zdravstvo Šibensko-Kninske županije                | Hrvatski zavod za javno zdravstvo                                                                                    | Anita Jurić; Dragan Jurić; Irena Tabain; Ivana Ferenčak; Josipa Kuzle                                                     |
| EPI_ISL_6596433, EPI_ISL_6596434, EPI_ISL_6596435, EPI_ISL_6596436, EPI_ISL_6596437, EPI_ISL_6596438, EPI_ISL_6596439, EPI_ISL_6596440, EPI_ISL_6596441, EPI_ISL_6596442, EPI_ISL_6596443, EPI_ISL_6596444, EPI_ISL_6596445, EPI_ISL_6596446, EPI_ISL_6596447, EPI_ISL_6596448, EPI_ISL_6596449, EPI_ISL_6596450, EPI_ISL_6596451, EPI_ISL_6596452, EPI_ISL_6596453, EPI_ISL_6596454, EPI_ISL_6596455, EPI_ISL_6596456, EPI_ISL_6596457, EPI_ISL_6596458, EPI_ISL_6596459, EPI_ISL_6596460, EPI_ISL_6596461, EPI_ISL_6596462, EPI_ISL_6596463, EPI_ISL_6596464, EPI_ISL_6596465, EPI_ISL_6596466, EPI_ISL_6596467, EPI_ISL_6596468, EPI_ISL_6596469, EPI_ISL_6596470, EPI_ISL_6596471, EPI_ISL_6596472, EPI_ISL_6596473, EPI_ISL_6596474, EPI_ISL_6596475, EPI_ISL_6596476, EPI_ISL_6596477, EPI_ISL_6596478, EPI_ISL_6596479, EPI_ISL_6596480, EPI_ISL_6596481, EPI_ISL_6596482, EPI_ISL_6596483, EPI_ISL_6596484, EPI_ISL_6596485, EPI_ISL_6596486                                                                                                                                                                                                                                                                                                                                                                                                                                                                                                                                                                                                                                                                                                                                                                                                                                                                                                                                                       | Zavod za javno zdravstvo Sveti Rok Virovitičko-podravske županije | Hrvatski zavod za javno zdravstvo                                                                                    | Anita Jurić; Dragan Jurić; Irena Tabain; Ivana Ferenčak; Josipa Kuzle                                                     |

We gratefully acknowledge the following Authors from the Originating laboratories responsible for obtaining the specimens, as well as the Submitting laboratories where the genome data were generated and shared via GISAID, on which this research is based.

All Submitters of data may be contacted directly via [www.gisaid.org](http://www.gisaid.org)

Authors are sorted alphabetically.

| Accession ID                                                                                                                                                                                                                                                                                                                                                                                                                                                                                                                                                                                                                                                                                                                                                                                                                                                                                                                                                                                                                                                                                                                                                                                                                                                                                                                                                                                                                                                                                                                                                                                                                                                                                                                                                                                                                                                                                                                                                                                                                                                                                                                                                                                                                                                                                                                                                                                                                                                                                                                                                                                                                                                                                                                                                                                                                                                                                                                                                                                                                                                                                                                                                                                                                                                                                                                                                                                                                                                                                                                                                                                                                                                                                                                                                                                                                                                                                                                                                                                                                                                                                                                                                                                                                                                                                                                                                                                                                                                                                                                                                                                                                                                                                                                                                                                                                                                                                                                                                                                                                                                                                                                                                                                                                                                                                                                                                                                                                                                                                                                                                                                                                                                                                                                                                                                                                                                                                                                                                                                                                                                                                                                                                                                                                                                                                                                                                                                                                                                                                                                                                                                                                                                                                                                                                                                                                                                                                                                                                                                                                                                                                                                                                                                                                                                                                                                                                                                                                                                                                                                                                                                                                                                                                                                                                                                                                                                                                                                                                                                                                                                                                                                                                                                                                                                                                                                                                                                                                                                                                                                                                                                                                                                                                                                                                                                                                                                                                                                                                                                                                                                                                                                                                                                                                                                                                                                                                                                                                                                                                                                                                                                                                                                                                                                                                                                                                                                                                                                                                                                                                                                                                                                                                                                                                                                                                                                                                                                                                                                                                                                                                                                                                                                                                                                                                                                                                                                                                                                                                                                                                                                                                                                                                                                                                                                                                                                                                                                                                                                                                                                                                                                                                                                                                                                                                                                                                                                                                                                                                                                                                                                                                                                                                                                                                                                                                                                                                                                                                                                                                                                                                                                                                                                                                                                                                                                                                                                                                                                                                                                                                                                                                                                                                                                                                                                                                           | Originating Laboratory | Submitting Laboratory | Authors                                                                                                                                                                                                                                                                                                                                                                                                                                                                                                                                                         |
|--------------------------------------------------------------------------------------------------------------------------------------------------------------------------------------------------------------------------------------------------------------------------------------------------------------------------------------------------------------------------------------------------------------------------------------------------------------------------------------------------------------------------------------------------------------------------------------------------------------------------------------------------------------------------------------------------------------------------------------------------------------------------------------------------------------------------------------------------------------------------------------------------------------------------------------------------------------------------------------------------------------------------------------------------------------------------------------------------------------------------------------------------------------------------------------------------------------------------------------------------------------------------------------------------------------------------------------------------------------------------------------------------------------------------------------------------------------------------------------------------------------------------------------------------------------------------------------------------------------------------------------------------------------------------------------------------------------------------------------------------------------------------------------------------------------------------------------------------------------------------------------------------------------------------------------------------------------------------------------------------------------------------------------------------------------------------------------------------------------------------------------------------------------------------------------------------------------------------------------------------------------------------------------------------------------------------------------------------------------------------------------------------------------------------------------------------------------------------------------------------------------------------------------------------------------------------------------------------------------------------------------------------------------------------------------------------------------------------------------------------------------------------------------------------------------------------------------------------------------------------------------------------------------------------------------------------------------------------------------------------------------------------------------------------------------------------------------------------------------------------------------------------------------------------------------------------------------------------------------------------------------------------------------------------------------------------------------------------------------------------------------------------------------------------------------------------------------------------------------------------------------------------------------------------------------------------------------------------------------------------------------------------------------------------------------------------------------------------------------------------------------------------------------------------------------------------------------------------------------------------------------------------------------------------------------------------------------------------------------------------------------------------------------------------------------------------------------------------------------------------------------------------------------------------------------------------------------------------------------------------------------------------------------------------------------------------------------------------------------------------------------------------------------------------------------------------------------------------------------------------------------------------------------------------------------------------------------------------------------------------------------------------------------------------------------------------------------------------------------------------------------------------------------------------------------------------------------------------------------------------------------------------------------------------------------------------------------------------------------------------------------------------------------------------------------------------------------------------------------------------------------------------------------------------------------------------------------------------------------------------------------------------------------------------------------------------------------------------------------------------------------------------------------------------------------------------------------------------------------------------------------------------------------------------------------------------------------------------------------------------------------------------------------------------------------------------------------------------------------------------------------------------------------------------------------------------------------------------------------------------------------------------------------------------------------------------------------------------------------------------------------------------------------------------------------------------------------------------------------------------------------------------------------------------------------------------------------------------------------------------------------------------------------------------------------------------------------------------------------------------------------------------------------------------------------------------------------------------------------------------------------------------------------------------------------------------------------------------------------------------------------------------------------------------------------------------------------------------------------------------------------------------------------------------------------------------------------------------------------------------------------------------------------------------------------------------------------------------------------------------------------------------------------------------------------------------------------------------------------------------------------------------------------------------------------------------------------------------------------------------------------------------------------------------------------------------------------------------------------------------------------------------------------------------------------------------------------------------------------------------------------------------------------------------------------------------------------------------------------------------------------------------------------------------------------------------------------------------------------------------------------------------------------------------------------------------------------------------------------------------------------------------------------------------------------------------------------------------------------------------------------------------------------------------------------------------------------------------------------------------------------------------------------------------------------------------------------------------------------------------------------------------------------------------------------------------------------------------------------------------------------------------------------------------------------------------------------------------------------------------------------------------------------------------------------------------------------------------------------------------------------------------------------------------------------------------------------------------------------------------------------------------------------------------------------------------------------------------------------------------------------------------------------------------------------------------------------------------------------------------------------------------------------------------------------------------------------------------------------------------------------------------------------------------------------------------------------------------------------------------------------------------------------------------------------------------------------------------------------------------------------------------------------------------------------------------------------------------------------------------------------------------------------------------------------------------------------------------------------------------------------------------------------------------------------------------------------------------------------------------------------------------------------------------------------------------------------------------------------------------------------------------------------------------------------------------------------------------------------------------------------------------------------------------------------------------------------------------------------------------------------------------------------------------------------------------------------------------------------------------------------------------------------------------------------------------------------------------------------------------------------------------------------------------------------------------------------------------------------------------------------------------------------------------------------------------------------------------------------------------------------------------------------------------------------------------------------------------------------------------------------------------------------------------------------------------------------------------------------------------------------------------------------------------------------------------------------------------------------------------------------------------------------------------------------------------------------------------------------------------------------------------------------------------------------------------------------------------------------------------------------------------------------------------------------------------------------------------------------------------------------------------------------------------------------------------------------------------------------------------------------------------------------------------------------------------------------------------------------------------------------------------------------------------------------------------------------------------------------------------------------------------------------------------------------------------------------------------------------------------------------------------------------------------------------------------------------------------------------------------------------------------------------------------------------------------------------------------------------------------------------------------------------------------------------------------------------------------------------------------------------------------------------------------------------------------------------------------------------------------------------------------------------------------------------------------------------------------------------------------------------------------------------------------------------------------------------------------------------------------------------------------------------------------------------------------------------------------------------------------------------------------------------------------------------------------------------------------------------------------------------------------------------------------------------------------------------------------------------------------------------------------------------------------------------------------------------------------------------------------------------------------------------------------------------------------------------------------------------------------------------------------------------------------------|------------------------|-----------------------|-----------------------------------------------------------------------------------------------------------------------------------------------------------------------------------------------------------------------------------------------------------------------------------------------------------------------------------------------------------------------------------------------------------------------------------------------------------------------------------------------------------------------------------------------------------------|
| <a href="#">EPI_ISL_5646317</a> , <a href="#">EPI_ISL_5647221</a> , <a href="#">EPI_ISL_5647270</a>                                                                                                                                                                                                                                                                                                                                                                                                                                                                                                                                                                                                                                                                                                                                                                                                                                                                                                                                                                                                                                                                                                                                                                                                                                                                                                                                                                                                                                                                                                                                                                                                                                                                                                                                                                                                                                                                                                                                                                                                                                                                                                                                                                                                                                                                                                                                                                                                                                                                                                                                                                                                                                                                                                                                                                                                                                                                                                                                                                                                                                                                                                                                                                                                                                                                                                                                                                                                                                                                                                                                                                                                                                                                                                                                                                                                                                                                                                                                                                                                                                                                                                                                                                                                                                                                                                                                                                                                                                                                                                                                                                                                                                                                                                                                                                                                                                                                                                                                                                                                                                                                                                                                                                                                                                                                                                                                                                                                                                                                                                                                                                                                                                                                                                                                                                                                                                                                                                                                                                                                                                                                                                                                                                                                                                                                                                                                                                                                                                                                                                                                                                                                                                                                                                                                                                                                                                                                                                                                                                                                                                                                                                                                                                                                                                                                                                                                                                                                                                                                                                                                                                                                                                                                                                                                                                                                                                                                                                                                                                                                                                                                                                                                                                                                                                                                                                                                                                                                                                                                                                                                                                                                                                                                                                                                                                                                                                                                                                                                                                                                                                                                                                                                                                                                                                                                                                                                                                                                                                                                                                                                                                                                                                                                                                                                                                                                                                                                                                                                                                                                                                                                                                                                                                                                                                                                                                                                                                                                                                                                                                                                                                                                                                                                                                                                                                                                                                                                                                                                                                                                                                                                                                                                                                                                                                                                                                                                                                                                                                                                                                                                                                                                                                                                                                                                                                                                                                                                                                                                                                                                                                                                                                                                                                                                                                                                                                                                                                                                                                                                                                                                                                                                                                                                                                                                                                                                                                                                                                                                                                                                                                                                                                                                                                                                    | ADECIO POMPEU CARVALHO | Instituto Butantan    | Antonio Jorge Martins; Claudia Renata dos Santos Barros; David Schlesinger; Debra Botelho Moretti; Dimas Tadeu Covas; Elaine Cristina Marquize; Elaine Vieira Santos; Evandra Strazza Rodrigues; Heidge Fukumasu; Jayme Augusto de Souza-Neto; José Salvatore Leister Patané; Luiz Alcantara; Luiz Lehmann Coutinho; Maria Carolina Elias; Mauricio Lacerda Nogueira; Rafael dos Santos Bezerra; Raul Machado Neto; Rejane Maria Tommasini Grotto; Ricardo Haddad; Sandra Coccuzzo Sampaio Vessoni; Simone Kashima; Svetoslav Naney Slavov; Vincent Louis Viala |
| <a href="#">EPI_ISL_5645634</a> , <a href="#">EPI_ISL_5645644</a> , <a href="#">EPI_ISL_5645645</a> , <a href="#">EPI_ISL_5645652</a> , <a href="#">EPI_ISL_5645662</a> , <a href="#">EPI_ISL_5645667</a> , <a href="#">EPI_ISL_5645676</a> , <a href="#">EPI_ISL_5645677</a> , <a href="#">EPI_ISL_5645696</a> , <a href="#">EPI_ISL_5645697</a> , <a href="#">EPI_ISL_5645698</a> , <a href="#">EPI_ISL_5645699</a> , <a href="#">EPI_ISL_5645702</a> , <a href="#">EPI_ISL_5645706</a> , <a href="#">EPI_ISL_5645710</a> , <a href="#">EPI_ISL_5645715</a> , <a href="#">EPI_ISL_5645720</a> , <a href="#">EPI_ISL_5645732</a> , <a href="#">EPI_ISL_5645741</a> , <a href="#">EPI_ISL_5645742</a> , <a href="#">EPI_ISL_5645744</a> , <a href="#">EPI_ISL_5645750</a> , <a href="#">EPI_ISL_5645751</a> , <a href="#">EPI_ISL_5645756</a> , <a href="#">EPI_ISL_5645760</a> , <a href="#">EPI_ISL_5645764</a> , <a href="#">EPI_ISL_5645767</a> , <a href="#">EPI_ISL_5645770</a> , <a href="#">EPI_ISL_5645773</a> , <a href="#">EPI_ISL_5645780</a> , <a href="#">EPI_ISL_5645782</a> , <a href="#">EPI_ISL_5645785</a> , <a href="#">EPI_ISL_5645791</a> , <a href="#">EPI_ISL_5645792</a> , <a href="#">EPI_ISL_5645793</a> , <a href="#">EPI_ISL_5645794</a> , <a href="#">EPI_ISL_5645795</a> , <a href="#">EPI_ISL_5645796</a> , <a href="#">EPI_ISL_5645797</a> , <a href="#">EPI_ISL_5645798</a> , <a href="#">EPI_ISL_5645799</a> , <a href="#">EPI_ISL_5645800</a> , <a href="#">EPI_ISL_5645801</a> , <a href="#">EPI_ISL_5645802</a> , <a href="#">EPI_ISL_5645803</a> , <a href="#">EPI_ISL_5645804</a> , <a href="#">EPI_ISL_5645805</a> , <a href="#">EPI_ISL_5645806</a> , <a href="#">EPI_ISL_5645807</a> , <a href="#">EPI_ISL_5645808</a> , <a href="#">EPI_ISL_5645809</a> , <a href="#">EPI_ISL_5645810</a> , <a href="#">EPI_ISL_5645811</a> , <a href="#">EPI_ISL_5645812</a> , <a href="#">EPI_ISL_5645813</a> , <a href="#">EPI_ISL_5645814</a> , <a href="#">EPI_ISL_5645815</a> , <a href="#">EPI_ISL_5645816</a> , <a href="#">EPI_ISL_5645817</a> , <a href="#">EPI_ISL_5645818</a> , <a href="#">EPI_ISL_5645819</a> , <a href="#">EPI_ISL_5645820</a> , <a href="#">EPI_ISL_5645821</a> , <a href="#">EPI_ISL_5645822</a> , <a href="#">EPI_ISL_5645823</a> , <a href="#">EPI_ISL_5645824</a> , <a href="#">EPI_ISL_5645825</a> , <a href="#">EPI_ISL_5645826</a> , <a href="#">EPI_ISL_5645827</a> , <a href="#">EPI_ISL_5645828</a> , <a href="#">EPI_ISL_5645829</a> , <a href="#">EPI_ISL_5645830</a> , <a href="#">EPI_ISL_5645831</a> , <a href="#">EPI_ISL_5645832</a> , <a href="#">EPI_ISL_5645833</a> , <a href="#">EPI_ISL_5645834</a> , <a href="#">EPI_ISL_5645835</a> , <a href="#">EPI_ISL_5645836</a> , <a href="#">EPI_ISL_5645837</a> , <a href="#">EPI_ISL_5645838</a> , <a href="#">EPI_ISL_5645839</a> , <a href="#">EPI_ISL_5645840</a> , <a href="#">EPI_ISL_5645841</a> , <a href="#">EPI_ISL_5645842</a> , <a href="#">EPI_ISL_5645843</a> , <a href="#">EPI_ISL_5645844</a> , <a href="#">EPI_ISL_5645845</a> , <a href="#">EPI_ISL_5645846</a> , <a href="#">EPI_ISL_5645847</a> , <a href="#">EPI_ISL_5645848</a> , <a href="#">EPI_ISL_5645849</a> , <a href="#">EPI_ISL_5645850</a> , <a href="#">EPI_ISL_5645851</a> , <a href="#">EPI_ISL_5645852</a> , <a href="#">EPI_ISL_5645853</a> , <a href="#">EPI_ISL_5645854</a> , <a href="#">EPI_ISL_5645855</a> , <a href="#">EPI_ISL_5645856</a> , <a href="#">EPI_ISL_5645857</a> , <a href="#">EPI_ISL_5645858</a> , <a href="#">EPI_ISL_5645859</a> , <a href="#">EPI_ISL_5645860</a> , <a href="#">EPI_ISL_5645861</a> , <a href="#">EPI_ISL_5645862</a> , <a href="#">EPI_ISL_5645863</a> , <a href="#">EPI_ISL_5645864</a> , <a href="#">EPI_ISL_5645865</a> , <a href="#">EPI_ISL_5645866</a> , <a href="#">EPI_ISL_5645867</a> , <a href="#">EPI_ISL_5645868</a> , <a href="#">EPI_ISL_5645869</a> , <a href="#">EPI_ISL_5645870</a> , <a href="#">EPI_ISL_5645871</a> , <a href="#">EPI_ISL_5645872</a> , <a href="#">EPI_ISL_5645873</a> , <a href="#">EPI_ISL_5645874</a> , <a href="#">EPI_ISL_5645875</a> , <a href="#">EPI_ISL_5645876</a> , <a href="#">EPI_ISL_5645877</a> , <a href="#">EPI_ISL_5645878</a> , <a href="#">EPI_ISL_5645879</a> , <a href="#">EPI_ISL_5645880</a> , <a href="#">EPI_ISL_5645881</a> , <a href="#">EPI_ISL_5645882</a> , <a href="#">EPI_ISL_5645883</a> , <a href="#">EPI_ISL_5645884</a> , <a href="#">EPI_ISL_5645885</a> , <a href="#">EPI_ISL_5645886</a> , <a href="#">EPI_ISL_5645887</a> , <a href="#">EPI_ISL_5645888</a> , <a href="#">EPI_ISL_5645889</a> , <a href="#">EPI_ISL_5645890</a> , <a href="#">EPI_ISL_5645891</a> , <a href="#">EPI_ISL_5645892</a> , <a href="#">EPI_ISL_5645893</a> , <a href="#">EPI_ISL_5645894</a> , <a href="#">EPI_ISL_5645895</a> , <a href="#">EPI_ISL_5645896</a> , <a href="#">EPI_ISL_5645897</a> , <a href="#">EPI_ISL_5645898</a> , <a href="#">EPI_ISL_5645899</a> , <a href="#">EPI_ISL_5645900</a> , <a href="#">EPI_ISL_5645901</a> , <a href="#">EPI_ISL_5645902</a> , <a href="#">EPI_ISL_5645903</a> , <a href="#">EPI_ISL_5645904</a> , <a href="#">EPI_ISL_5645905</a> , <a href="#">EPI_ISL_5645906</a> , <a href="#">EPI_ISL_5645907</a> , <a href="#">EPI_ISL_5645908</a> , <a href="#">EPI_ISL_5645909</a> , <a href="#">EPI_ISL_5645910</a> , <a href="#">EPI_ISL_5645911</a> , <a href="#">EPI_ISL_5645912</a> , <a href="#">EPI_ISL_5645913</a> , <a href="#">EPI_ISL_5645914</a> , <a href="#">EPI_ISL_5645915</a> , <a href="#">EPI_ISL_5645916</a> , <a href="#">EPI_ISL_5645917</a> , <a href="#">EPI_ISL_5645918</a> , <a href="#">EPI_ISL_5645919</a> , <a href="#">EPI_ISL_5645920</a> , <a href="#">EPI_ISL_5645921</a> , <a href="#">EPI_ISL_5645922</a> , <a href="#">EPI_ISL_5645923</a> , <a href="#">EPI_ISL_5645924</a> , <a href="#">EPI_ISL_5645925</a> , <a href="#">EPI_ISL_5645926</a> , <a href="#">EPI_ISL_5645927</a> , <a href="#">EPI_ISL_5645928</a> , <a href="#">EPI_ISL_5645929</a> , <a href="#">EPI_ISL_5645930</a> , <a href="#">EPI_ISL_5645931</a> , <a href="#">EPI_ISL_5645932</a> , <a href="#">EPI_ISL_5645933</a> , <a href="#">EPI_ISL_5645934</a> , <a href="#">EPI_ISL_5645935</a> , <a href="#">EPI_ISL_5645936</a> , <a href="#">EPI_ISL_5645937</a> , <a href="#">EPI_ISL_5645938</a> , <a href="#">EPI_ISL_5645939</a> , <a href="#">EPI_ISL_5645940</a> , <a href="#">EPI_ISL_5645941</a> , <a href="#">EPI_ISL_5645942</a> , <a href="#">EPI_ISL_5645943</a> , <a href="#">EPI_ISL_5645944</a> , <a href="#">EPI_ISL_5645945</a> , <a href="#">EPI_ISL_5645946</a> , <a href="#">EPI_ISL_5645947</a> , <a href="#">EPI_ISL_5645948</a> , <a href="#">EPI_ISL_5645949</a> , <a href="#">EPI_ISL_5645950</a> , <a href="#">EPI_ISL_5645951</a> , <a href="#">EPI_ISL_5645952</a> , <a href="#">EPI_ISL_5645953</a> , <a href="#">EPI_ISL_5645954</a> , <a href="#">EPI_ISL_5645955</a> , <a href="#">EPI_ISL_5645956</a> , <a href="#">EPI_ISL_5645957</a> , <a href="#">EPI_ISL_5645958</a> , <a href="#">EPI_ISL_5645959</a> , <a href="#">EPI_ISL_5645960</a> , <a href="#">EPI_ISL_5645961</a> , <a href="#">EPI_ISL_5645962</a> , <a href="#">EPI_ISL_5645963</a> , <a href="#">EPI_ISL_5645964</a> , <a href="#">EPI_ISL_5645965</a> , <a href="#">EPI_ISL_5645966</a> , <a href="#">EPI_ISL_5645967</a> , <a href="#">EPI_ISL_5645968</a> , <a href="#">EPI_ISL_5645969</a> , <a href="#">EPI_ISL_5645970</a> , <a href="#">EPI_ISL_5645971</a> , <a href="#">EPI_ISL_5645972</a> , <a href="#">EPI_ISL_5645973</a> , <a href="#">EPI_ISL_5645974</a> , <a href="#">EPI_ISL_5645975</a> , <a href="#">EPI_ISL_5645976</a> , <a href="#">EPI_ISL_5645977</a> , <a href="#">EPI_ISL_5645978</a> , <a href="#">EPI_ISL_5645979</a> , <a href="#">EPI_ISL_5645980</a> , <a href="#">EPI_ISL_5645981</a> , <a href="#">EPI_ISL_5645982</a> , <a href="#">EPI_ISL_5645983</a> , <a href="#">EPI_ISL_5645984</a> , <a href="#">EPI_ISL_5645985</a> , <a href="#">EPI_ISL_5645986</a> , <a href="#">EPI_ISL_5645987</a> , <a href="#">EPI_ISL_5645988</a> , <a href="#">EPI_ISL_5645989</a> , <a href="#">EPI_ISL_5645990</a> , <a href="#">EPI_ISL_5645991</a> , <a href="#">EPI_ISL_5645992</a> , <a href="#">EPI_ISL_5645993</a> , <a href="#">EPI_ISL_5645994</a> , <a href="#">EPI_ISL_5645995</a> , <a href="#">EPI_ISL_5645996</a> , <a href="#">EPI_ISL_5645997</a> , <a href="#">EPI_ISL_5645998</a> , <a href="#">EPI_ISL_5645999</a> , <a href="#">EPI_ISL_5650000</a>                                                                                                                                                                                                                                                                                                                                                                                                                                                                                                                                                                                                                                                                                                                                                                                                                                                                                                                                                                                                                                                                                                                                                                                                                                                                                                                                                                                                                                                                                                                                                                                                                                                                                                                                                                                                                                                                                                                                                                                                                                                                                                                                                                                                                                                                                                                                                                                                                                                                                                                                                                                                                                                                                                                                                                                                                                                                                                                                                                                                                                                                                                                                                                                                                                                                                                                                                                                                                                                                                                                                                                                                                                                                                                                                                                                                                                                                                                                                                                                                                                                                                                                                                                                                                                                                                                                                                                                                                                                                                                                                                                                                                                                                                                                                      | ADECIO POMPEU CARVALHO | Instituto Butantan    | Antonio Jorge Martins; Claudia Renata dos Santos Barros; David Schlesinger; Debra Botelho Moretti; Dimas Tadeu Covas; Elaine Cristina Marquize; Elaine Vieira Santos; Evandra Strazza Rodrigues; Heidge Fukumasu; Jayme Augusto de Souza-Neto; José Salvatore Leister Patané; Luiz Alcantara; Luiz Lehmann Coutinho; Maria Carolina Elias; Mauricio Lacerda Nogueira; Rafael dos Santos Bezerra; Raul Machado Neto; Rejane Maria Tommasini Grotto; Ricardo Haddad; Sandra Coccuzzo Sampaio Vessoni; Simone Kashima; Svetoslav Naney Slavov; Vincent Louis Viala |
| <a href="#">EPI_ISL_5651159</a> , <a href="#">EPI_ISL_5651171</a> , <a href="#">EPI_ISL_5651204</a> , <a href="#">EPI_ISL_5651218</a> , <a href="#">EPI_ISL_5651234</a> , <a href="#">EPI_ISL_5651251</a> , <a href="#">EPI_ISL_5651269</a> , <a href="#">EPI_ISL_5651284</a> , <a href="#">EPI_ISL_5651300</a> , <a href="#">EPI_ISL_5651317</a> , <a href="#">EPI_ISL_5651334</a> , <a href="#">EPI_ISL_5651351</a> , <a href="#">EPI_ISL_5651368</a> , <a href="#">EPI_ISL_5651385</a> , <a href="#">EPI_ISL_5651402</a> , <a href="#">EPI_ISL_5651419</a> , <a href="#">EPI_ISL_5651436</a> , <a href="#">EPI_ISL_5651453</a> , <a href="#">EPI_ISL_5651470</a> , <a href="#">EPI_ISL_5651487</a> , <a href="#">EPI_ISL_5651504</a> , <a href="#">EPI_ISL_5651521</a> , <a href="#">EPI_ISL_5651538</a> , <a href="#">EPI_ISL_5651555</a> , <a href="#">EPI_ISL_5651572</a> , <a href="#">EPI_ISL_5651589</a> , <a href="#">EPI_ISL_5651606</a> , <a href="#">EPI_ISL_5651623</a> , <a href="#">EPI_ISL_5651640</a> , <a href="#">EPI_ISL_5651657</a> , <a href="#">EPI_ISL_5651674</a> , <a href="#">EPI_ISL_5651691</a> , <a href="#">EPI_ISL_5651708</a> , <a href="#">EPI_ISL_5651725</a> , <a href="#">EPI_ISL_5651742</a> , <a href="#">EPI_ISL_5651759</a> , <a href="#">EPI_ISL_5651776</a> , <a href="#">EPI_ISL_5651793</a> , <a href="#">EPI_ISL_5651810</a> , <a href="#">EPI_ISL_5651827</a> , <a href="#">EPI_ISL_5651844</a> , <a href="#">EPI_ISL_5651861</a> , <a href="#">EPI_ISL_5651878</a> , <a href="#">EPI_ISL_5651895</a> , <a href="#">EPI_ISL_5651912</a> , <a href="#">EPI_ISL_5651929</a> , <a href="#">EPI_ISL_5651946</a> , <a href="#">EPI_ISL_5651963</a> , <a href="#">EPI_ISL_5651980</a> , <a href="#">EPI_ISL_5651997</a> , <a href="#">EPI_ISL_5652014</a> , <a href="#">EPI_ISL_5652031</a> , <a href="#">EPI_ISL_5652048</a> , <a href="#">EPI_ISL_5652065</a> , <a href="#">EPI_ISL_5652082</a> , <a href="#">EPI_ISL_5652099</a> , <a href="#">EPI_ISL_5652116</a> , <a href="#">EPI_ISL_5652133</a> , <a href="#">EPI_ISL_5652150</a> , <a href="#">EPI_ISL_5652167</a> , <a href="#">EPI_ISL_5652184</a> , <a href="#">EPI_ISL_5652201</a> , <a href="#">EPI_ISL_5652218</a> , <a href="#">EPI_ISL_5652235</a> , <a href="#">EPI_ISL_5652252</a> , <a href="#">EPI_ISL_5652269</a> , <a href="#">EPI_ISL_5652286</a> , <a href="#">EPI_ISL_5652303</a> , <a href="#">EPI_ISL_5652320</a> , <a href="#">EPI_ISL_5652337</a> , <a href="#">EPI_ISL_5652354</a> , <a href="#">EPI_ISL_5652371</a> , <a href="#">EPI_ISL_5652388</a> , <a href="#">EPI_ISL_5652405</a> , <a href="#">EPI_ISL_5652422</a> , <a href="#">EPI_ISL_5652439</a> , <a href="#">EPI_ISL_5652456</a> , <a href="#">EPI_ISL_5652473</a> , <a href="#">EPI_ISL_5652490</a> , <a href="#">EPI_ISL_5652507</a> , <a href="#">EPI_ISL_5652524</a> , <a href="#">EPI_ISL_5652541</a> , <a href="#">EPI_ISL_5652558</a> , <a href="#">EPI_ISL_5652575</a> , <a href="#">EPI_ISL_5652592</a> , <a href="#">EPI_ISL_5652609</a> , <a href="#">EPI_ISL_5652626</a> , <a href="#">EPI_ISL_5652643</a> , <a href="#">EPI_ISL_5652660</a> , <a href="#">EPI_ISL_5652677</a> , <a href="#">EPI_ISL_5652694</a> , <a href="#">EPI_ISL_5652711</a> , <a href="#">EPI_ISL_5652728</a> , <a href="#">EPI_ISL_5652745</a> , <a href="#">EPI_ISL_5652762</a> , <a href="#">EPI_ISL_5652779</a> , <a href="#">EPI_ISL_5652796</a> , <a href="#">EPI_ISL_5652813</a> , <a href="#">EPI_ISL_5652830</a> , <a href="#">EPI_ISL_5652847</a> , <a href="#">EPI_ISL_5652864</a> , <a href="#">EPI_ISL_5652881</a> , <a href="#">EPI_ISL_5652898</a> , <a href="#">EPI_ISL_5652915</a> , <a href="#">EPI_ISL_5652932</a> , <a href="#">EPI_ISL_5652949</a> , <a href="#">EPI_ISL_5652966</a> , <a href="#">EPI_ISL_5652983</a> , <a href="#">EPI_ISL_5653000</a> , <a href="#">EPI_ISL_5653017</a> , <a href="#">EPI_ISL_5653034</a> , <a href="#">EPI_ISL_5653051</a> , <a href="#">EPI_ISL_5653068</a> , <a href="#">EPI_ISL_5653085</a> , <a href="#">EPI_ISL_5653102</a> , <a href="#">EPI_ISL_5653119</a> , <a href="#">EPI_ISL_5653136</a> , <a href="#">EPI_ISL_5653153</a> , <a href="#">EPI_ISL_5653170</a> , <a href="#">EPI_ISL_5653187</a> , <a href="#">EPI_ISL_5653204</a> , <a href="#">EPI_ISL_5653221</a> , <a href="#">EPI_ISL_5653238</a> , <a href="#">EPI_ISL_5653255</a> , <a href="#">EPI_ISL_5653272</a> , <a href="#">EPI_ISL_5653289</a> , <a href="#">EPI_ISL_5653306</a> , <a href="#">EPI_ISL_5653323</a> , <a href="#">EPI_ISL_5653340</a> , <a href="#">EPI_ISL_5653357</a> , <a href="#">EPI_ISL_5653374</a> , <a href="#">EPI_ISL_5653391</a> , <a href="#">EPI_ISL_5653408</a> , <a href="#">EPI_ISL_5653425</a> , <a href="#">EPI_ISL_5653442</a> , <a href="#">EPI_ISL_5653459</a> , <a href="#">EPI_ISL_5653476</a> , <a href="#">EPI_ISL_5653493</a> , <a href="#">EPI_ISL_5653510</a> , <a href="#">EPI_ISL_5653527</a> , <a href="#">EPI_ISL_5653544</a> , <a href="#">EPI_ISL_5653561</a> , <a href="#">EPI_ISL_5653578</a> , <a href="#">EPI_ISL_5653595</a> , <a href="#">EPI_ISL_5653612</a> , <a href="#">EPI_ISL_5653629</a> , <a href="#">EPI_ISL_5653646</a> , <a href="#">EPI_ISL_5653663</a> , <a href="#">EPI_ISL_5653680</a> , <a href="#">EPI_ISL_5653697</a> , <a href="#">EPI_ISL_5653714</a> , <a href="#">EPI_ISL_5653731</a> , <a href="#">EPI_ISL_5653748</a> , <a href="#">EPI_ISL_5653765</a> , <a href="#">EPI_ISL_5653782</a> , <a href="#">EPI_ISL_5653799</a> , <a href="#">EPI_ISL_5653816</a> , <a href="#">EPI_ISL_5653833</a> , <a href="#">EPI_ISL_5653850</a> , <a href="#">EPI_ISL_5653867</a> , <a href="#">EPI_ISL_5653884</a> , <a href="#">EPI_ISL_5653901</a> , <a href="#">EPI_ISL_5653918</a> , <a href="#">EPI_ISL_5653935</a> , <a href="#">EPI_ISL_5653952</a> , <a href="#">EPI_ISL_5653969</a> , <a href="#">EPI_ISL_5653986</a> , <a href="#">EPI_ISL_5654003</a> , <a href="#">EPI_ISL_5654020</a> , <a href="#">EPI_ISL_5654037</a> , <a href="#">EPI_ISL_5654054</a> , <a href="#">EPI_ISL_5654071</a> , <a href="#">EPI_ISL_5654088</a> , <a href="#">EPI_ISL_5654105</a> , <a href="#">EPI_ISL_5654122</a> , <a href="#">EPI_ISL_5654139</a> , <a href="#">EPI_ISL_5654156</a> , <a href="#">EPI_ISL_5654173</a> , <a href="#">EPI_ISL_5654190</a> , <a href="#">EPI_ISL_5654207</a> , <a href="#">EPI_ISL_5654224</a> , <a href="#">EPI_ISL_5654241</a> , <a href="#">EPI_ISL_5654258</a> , <a href="#">EPI_ISL_5654275</a> , <a href="#">EPI_ISL_5654292</a> , <a href="#">EPI_ISL_5654309</a> , <a href="#">EPI_ISL_5654326</a> , <a href="#">EPI_ISL_5654343</a> , <a href="#">EPI_ISL_5654360</a> , <a href="#">EPI_ISL_5654377</a> , <a href="#">EPI_ISL_5654394</a> , <a href="#">EPI_ISL_5654411</a> , <a href="#">EPI_ISL_5654428</a> , <a href="#">EPI_ISL_5654445</a> , <a href="#">EPI_ISL_5654462</a> , <a href="#">EPI_ISL_5654479</a> , <a href="#">EPI_ISL_5654496</a> , <a href="#">EPI_ISL_5654513</a> , <a href="#">EPI_ISL_5654530</a> , <a href="#">EPI_ISL_5654547</a> , <a href="#">EPI_ISL_5654564</a> , <a href="#">EPI_ISL_5654581</a> , <a href="#">EPI_ISL_5654598</a> , <a href="#">EPI_ISL_5654615</a> , <a href="#">EPI_ISL_5654632</a> , <a href="#">EPI_ISL_5654649</a> , <a href="#">EPI_ISL_5654666</a> , <a href="#">EPI_ISL_5654683</a> , <a href="#">EPI_ISL_5654700</a> , <a href="#">EPI_ISL_5654717</a> , <a href="#">EPI_ISL_5654734</a> , <a href="#">EPI_ISL_5654751</a> , <a href="#">EPI_ISL_5654768</a> , <a href="#">EPI_ISL_5654785</a> , <a href="#">EPI_ISL_5654802</a> , <a href="#">EPI_ISL_5654819</a> , <a href="#">EPI_ISL_5654836</a> , <a href="#">EPI_ISL_5654853</a> , <a href="#">EPI_ISL_5654870</a> , <a href="#">EPI_ISL_5654887</a> , <a href="#">EPI_ISL_5654904</a> , <a href="#">EPI_ISL_5654921</a> , <a href="#">EPI_ISL_5654938</a> , <a href="#">EPI_ISL_5654955</a> , <a href="#">EPI_ISL_5654972</a> , <a href="#">EPI_ISL_5654989</a> , <a href="#">EPI_ISL_5655006</a> , <a href="#">EPI_ISL_5655023</a> , <a href="#">EPI_ISL_5655040</a> , <a href="#">EPI_ISL_5655057</a> , <a href="#">EPI_ISL_5655074</a> , <a href="#">EPI_ISL_5655091</a> , <a href="#">EPI_ISL_5655108</a> , <a href="#">EPI_ISL_5655125</a> , <a href="#">EPI_ISL_5655142</a> , <a href="#">EPI_ISL_5655159</a> , <a href="#">EPI_ISL_5655176</a> , <a href="#">EPI_ISL_5655193</a> , <a href="#">EPI_ISL_5655210</a> , <a href="#">EPI_ISL_5655227</a> , <a href="#">EPI_ISL_5655244</a> , <a href="#">EPI_ISL_5655261</a> , <a href="#">EPI_ISL_5655278</a> , <a href="#">EPI_ISL_5655295</a> , <a href="#">EPI_ISL_5655312</a> , <a href="#">EPI_ISL_5655329</a> , <a href="#">EPI_ISL_5655346</a> , <a href="#">EPI_ISL_5655363</a> , <a href="#">EPI_ISL_5655380</a> , <a href="#">EPI_ISL_5655397</a> , <a href="#">EPI_ISL_5655414</a> , <a href="#">EPI_ISL_5655431</a> , <a href="#">EPI_ISL_5655448</a> , <a href="#">EPI_ISL_5655465</a> , <a href="#">EPI_ISL_5655482</a> , <a href="#">EPI_ISL_5655499</a> , <a href="#">EPI_ISL_5655516</a> , <a href="#">EPI_ISL_5655533</a> , <a href="#">EPI_ISL_5655550</a> , <a href="#">EPI_ISL_5655567</a> , <a href="#">EPI_ISL_5655584</a> , <a href="#">EPI_ISL_5655601</a> , <a href="#">EPI_ISL_5655618</a> , <a href="#">EPI_ISL_5655635</a> , <a href="#">EPI_ISL_5655652</a> , <a href="#">EPI_ISL_5655669</a> , <a href="#">EPI_ISL_5655686</a> , <a href="#">EPI_ISL_5655703</a> , <a href="#">EPI_ISL_5655720</a> , <a href="#">EPI_ISL_5655737</a> , <a href="#">EPI_ISL_5655754</a> , <a href="#">EPI_ISL_5655771</a> , <a href="#">EPI_ISL_5655788</a> , <a href="#">EPI_ISL_5655805</a> , <a href="#">EPI_ISL_5655822</a> , <a href="#">EPI_ISL_5655839</a> , <a href="#">EPI_ISL_5655856</a> , <a href="#">EPI_ISL_5655873</a> , <a href="#">EPI_ISL_5655890</a> , <a href="#">EPI_ISL_5655907</a> , <a href="#">EPI_ISL_5655924</a> , <a href="#">EPI_ISL_5655941</a> , <a href="#">EPI_ISL_5655958</a> , <a href="#">EPI_ISL_5655975</a> , <a href="#">EPI_ISL_5655992</a> , <a href="#">EPI_ISL_5656009</a> , <a href="#">EPI_ISL_5656026</a> , <a href="#">EPI_ISL_5656043</a> , <a href="#">EPI_ISL_5656060</a> , <a href="#">EPI_ISL_5656077</a> , <a href="#">EPI_ISL_5656094</a> , <a href="#">EPI_ISL_5656111</a> , <a href="#">EPI_ISL_5656128</a> , <a href="#">EPI_ISL_5656145</a> , <a href="#">EPI_ISL_5656162</a> , <a href="#">EPI_ISL_5656179</a> , <a href="#">EPI_ISL_5656196</a> , <a href="#">EPI_ISL_5656213</a> , <a href="#">EPI_ISL_5656230</a> , <a href="#">EPI_ISL_5656247</a> , <a href="#">EPI_ISL_5656264</a> , <a href="#">EPI_ISL_5656281</a> , <a href="#">EPI_ISL_5656298</a> , <a href="#">EPI_ISL_5656315</a> , <a href="#">EPI_ISL_5656332</a> , <a href="#">EPI_ISL_5656349</a> , <a href="#">EPI_ISL_5656366</a> , <a href="#">EPI_ISL_5656383</a> , <a href="#">EPI_ISL_5656400</a> , <a href="#">EPI_ISL_5656417</a> , <a href="#">EPI_ISL_5656434</a> , <a href="#">EPI_ISL_5656451</a> , <a href="#">EPI_ISL_5656468</a> , <a href="#">EPI_ISL_5656485</a> , <a href="#">EPI_ISL_5656502</a> , <a href="#">EPI_ISL_5656519</a> , <a href="#">EPI_ISL_5656536</a> , <a href="#">EPI_ISL_5656553</a> , <a href="#">EPI_ISL_5656570</a> , <a href="#">EPI_ISL_5656587</a> , <a href="#">EPI_ISL_5656604</a> , <a href="#">EPI_ISL_5656621</a> , <a href="#">EPI_ISL_5656638</a> , <a href="#">EPI_ISL_5656655</a> , <a href="#">EPI_ISL_5656672</a> , <a href="#">EPI_ISL_5656689</a> , <a href="#">EPI_ISL_5656706</a> , <a href="#">EPI_ISL_5656723</a> , <a href="#">EPI_ISL_5656740</a> , <a href="#">EPI_ISL_5656757</a> , <a href="#">EPI_ISL_5656774</a> , <a href="#">EPI_ISL_5656791</a> , <a href="#">EPI_ISL_5656808</a> , <a href="#">EPI_ISL_5656825</a> , <a href="#">EPI_ISL_5656842</a> , <a href="#">EPI_ISL_5656859</a> , <a href="#">EPI_ISL_5656876</a> , <a href="#">EPI_ISL_5656893</a> , <a href="#">EPI_ISL_5656910</a> , <a href="#">EPI_ISL_5656927</a> , <a href="#">EPI_ISL_5656944</a> , <a href="#">EPI_ISL_5656961</a> , <a href="#">EPI_ISL_5656978</a> , <a href="#">EPI_ISL_5656995</a> , <a href="#">EPI_ISL_5657012</a> , <a href="#">EPI_ISL_5657029</a> , <a href="#">EPI_ISL_5657046</a> , <a href="#">EPI_ISL_5657063</a> , <a href="#">EPI_ISL_5657080</a> , <a href="#">EPI_ISL_5657097</a> , <a href="#">EPI_ISL_5657114</a> , <a href="#">EPI_ISL_5657131</a> , <a href="#">EPI_ISL_5657148</a> , <a href="#">EPI_ISL_5657165</a> , <a href="#">EPI_ISL_5657182</a> , <a href="#">EPI_ISL_5657199</a> , <a href="#">EPI_ISL_5657216</a> , <a href="#">EPI_ISL_5657233</a> , <a href="#">EPI_ISL_5657250</a> , <a href="#">EPI_ISL_5657267</a> , <a href="#">EPI_ISL_5657284</a> , <a href="#">EPI_ISL_5657301</a> , <a href="#">EPI_ISL_5657318</a> , <a href="#">EPI_ISL_5657335</a> , <a href="#">EPI_ISL_5657352</a> , <a href="#">EPI_ISL_5657369</a> , <a href="#">EPI_ISL_5657386</a> , <a href="#">EPI_ISL_5657403</a> , <a href="#">EPI_ISL_5657420</a> , <a href="#">EPI_ISL_5657437</a> , <a href="#">EPI_ISL_5657454</a> , <a href="#">EPI_ISL_5657471</a> , <a href="#">EPI_ISL_5657488</a> , <a href="#">EPI_ISL_5657505</a> , <a href="#">EPI_ISL_5657522</a> , <a href="#">EPI_ISL_</a> |                        |                       |                                                                                                                                                                                                                                                                                                                                                                                                                                                                                                                                                                 |















|                                                                                                                                                                                                                                                                                                                                                                                                                                                                                                                                                                                                                                                                      |                                                                                    |                                                                                         |  |                                                                                                                                                                                                                                                                                                                                                                                                                                                                                                                                                                   |
|----------------------------------------------------------------------------------------------------------------------------------------------------------------------------------------------------------------------------------------------------------------------------------------------------------------------------------------------------------------------------------------------------------------------------------------------------------------------------------------------------------------------------------------------------------------------------------------------------------------------------------------------------------------------|------------------------------------------------------------------------------------|-----------------------------------------------------------------------------------------|--|-------------------------------------------------------------------------------------------------------------------------------------------------------------------------------------------------------------------------------------------------------------------------------------------------------------------------------------------------------------------------------------------------------------------------------------------------------------------------------------------------------------------------------------------------------------------|
|                                                                                                                                                                                                                                                                                                                                                                                                                                                                                                                                                                                                                                                                      |                                                                                    |                                                                                         |  | Souza-Neto; José Salvatore Leister Patané; Luiz Alcantara; Luiz Lehmann Coutinho; Maria Carolina Elias; Maurício Lacerda Nogueira; Rafael dos Santos Bezerra; Raul Machado Neto; Rejane Maria Tommasini Grotto; Ricardo Haddad; Sandra Coccuzzo Sampaio Vessoni; Simone Kashima; Svetoslav Nanev Slavov; Vincent Louis Viala                                                                                                                                                                                                                                      |
| EPI_ISL_5652663                                                                                                                                                                                                                                                                                                                                                                                                                                                                                                                                                                                                                                                      | CS III MARTINIANO CRUZ DE GUAICARA                                                 | Instituto Butantan                                                                      |  | Antonio Jorge Martins; Claudia Renata dos Santos Barros; David Schlesinger; Debora Botequiu Moretti; Dimas Tadeu Covas; Elaine Cristina Marqueze; Elaine Vieira Santos; Evandra Strazza Rodrigues; Heidge Fukumasu; Jayme Augusto de Souza-Neto; José Salvatore Leister Patané; Luiz Alcantara; Luiz Lehmann Coutinho; Maria Carolina Elias; Maurício Lacerda Nogueira; Rafael dos Santos Bezerra; Raul Machado Neto; Rejane Maria Tommasini Grotto; Ricardo Haddad; Sandra Coccuzzo Sampaio Vessoni; Simone Kashima; Svetoslav Nanev Slavov; Vincent Louis Viala |
| EPI_ISL_5646440, EPI_ISL_5647217, EPI_ISL_5673690, EPI_ISL_5673744, EPI_ISL_5674234                                                                                                                                                                                                                                                                                                                                                                                                                                                                                                                                                                                  | CS III SANTOPILOS DO AGUAPEI                                                       | Instituto Butantan                                                                      |  | Antonio Jorge Martins; Claudia Renata dos Santos Barros; David Schlesinger; Debora Botequiu Moretti; Dimas Tadeu Covas; Elaine Cristina Marqueze; Elaine Vieira Santos; Evandra Strazza Rodrigues; Heidge Fukumasu; Jayme Augusto de Souza-Neto; José Salvatore Leister Patané; Luiz Alcantara; Luiz Lehmann Coutinho; Maria Carolina Elias; Maurício Lacerda Nogueira; Rafael dos Santos Bezerra; Raul Machado Neto; Rejane Maria Tommasini Grotto; Ricardo Haddad; Sandra Coccuzzo Sampaio Vessoni; Simone Kashima; Svetoslav Nanev Slavov; Vincent Louis Viala |
| EPI_ISL_5669442                                                                                                                                                                                                                                                                                                                                                                                                                                                                                                                                                                                                                                                      | CSA COMPLEXO DE SAUDE ANHANGUERA LTDA                                              | Instituto Butantan                                                                      |  | Antonio Jorge Martins; Claudia Renata dos Santos Barros; David Schlesinger; Debora Botequiu Moretti; Dimas Tadeu Covas; Elaine Cristina Marqueze; Elaine Vieira Santos; Evandra Strazza Rodrigues; Heidge Fukumasu; Jayme Augusto de Souza-Neto; José Salvatore Leister Patané; Luiz Alcantara; Luiz Lehmann Coutinho; Maria Carolina Elias; Maurício Lacerda Nogueira; Rafael dos Santos Bezerra; Raul Machado Neto; Rejane Maria Tommasini Grotto; Ricardo Haddad; Sandra Coccuzzo Sampaio Vessoni; Simone Kashima; Svetoslav Nanev Slavov; Vincent Louis Viala |
| EPI_ISL_5645734                                                                                                                                                                                                                                                                                                                                                                                                                                                                                                                                                                                                                                                      | CSA COMPLEXO DE SAUDE ANHANGUERA TUCURUVI                                          | Instituto Butantan                                                                      |  | Antonio Jorge Martins; Claudia Renata dos Santos Barros; David Schlesinger; Debora Botequiu Moretti; Dimas Tadeu Covas; Elaine Cristina Marqueze; Elaine Vieira Santos; Evandra Strazza Rodrigues; Heidge Fukumasu; Jayme Augusto de Souza-Neto; José Salvatore Leister Patané; Luiz Alcantara; Luiz Lehmann Coutinho; Maria Carolina Elias; Maurício Lacerda Nogueira; Rafael dos Santos Bezerra; Raul Machado Neto; Rejane Maria Tommasini Grotto; Ricardo Haddad; Sandra Coccuzzo Sampaio Vessoni; Simone Kashima; Svetoslav Nanev Slavov; Vincent Louis Viala |
| EPI_ISL_5645595, EPI_ISL_5650590, EPI_ISL_5650591, EPI_ISL_5651318, EPI_ISL_5651775, EPI_ISL_5663512, EPI_ISL_5669219, EPI_ISL_5669252, EPI_ISL_5669398, EPI_ISL_5669767, EPI_ISL_5670382, EPI_ISL_5670407, EPI_ISL_5670464, EPI_ISL_5670517                                                                                                                                                                                                                                                                                                                                                                                                                         | CSA COMPLEXO DE SAUDE ANHANGUERA VILA JAGUARA                                      | Instituto Butantan                                                                      |  | Antonio Jorge Martins; Claudia Renata dos Santos Barros; David Schlesinger; Debora Botequiu Moretti; Dimas Tadeu Covas; Elaine Cristina Marqueze; Elaine Vieira Santos; Evandra Strazza Rodrigues; Heidge Fukumasu; Jayme Augusto de Souza-Neto; José Salvatore Leister Patané; Luiz Alcantara; Luiz Lehmann Coutinho; Maria Carolina Elias; Maurício Lacerda Nogueira; Rafael dos Santos Bezerra; Raul Machado Neto; Rejane Maria Tommasini Grotto; Ricardo Haddad; Sandra Coccuzzo Sampaio Vessoni; Simone Kashima; Svetoslav Nanev Slavov; Vincent Louis Viala |
| EPI_ISL_5650774, EPI_ISL_5651331                                                                                                                                                                                                                                                                                                                                                                                                                                                                                                                                                                                                                                     | CSII DR JOSÉ FERREIRA TELLES                                                       | Instituto Butantan                                                                      |  | Antonio Jorge Martins; Claudia Renata dos Santos Barros; David Schlesinger; Debora Botequiu Moretti; Dimas Tadeu Covas; Elaine Cristina Marqueze; Elaine Vieira Santos; Evandra Strazza Rodrigues; Heidge Fukumasu; Jayme Augusto de Souza-Neto; José Salvatore Leister Patané; Luiz Alcantara; Luiz Lehmann Coutinho; Maria Carolina Elias; Maurício Lacerda Nogueira; Rafael dos Santos Bezerra; Raul Machado Neto; Rejane Maria Tommasini Grotto; Ricardo Haddad; Sandra Coccuzzo Sampaio Vessoni; Simone Kashima; Svetoslav Nanev Slavov; Vincent Louis Viala |
| EPI_ISL_5647681, EPI_ISL_5647751, EPI_ISL_5651719                                                                                                                                                                                                                                                                                                                                                                                                                                                                                                                                                                                                                    | CSIII DR HUGO ROCHA                                                                | Instituto Butantan                                                                      |  | Antonio Jorge Martins; Claudia Renata dos Santos Barros; David Schlesinger; Debora Botequiu Moretti; Dimas Tadeu Covas; Elaine Cristina Marqueze; Elaine Vieira Santos; Evandra Strazza Rodrigues; Heidge Fukumasu; Jayme Augusto de Souza-Neto; José Salvatore Leister Patané; Luiz Alcantara; Luiz Lehmann Coutinho; Maria Carolina Elias; Maurício Lacerda Nogueira; Rafael dos Santos Bezerra; Raul Machado Neto; Rejane Maria Tommasini Grotto; Ricardo Haddad; Sandra Coccuzzo Sampaio Vessoni; Simone Kashima; Svetoslav Nanev Slavov; Vincent Louis Viala |
| EPI_ISL_5656464                                                                                                                                                                                                                                                                                                                                                                                                                                                                                                                                                                                                                                                      | Central Laboratory, Bureau of Public Health (BOG) and Academic Hospital Paramaribo | Erasmus Medical Center                                                                  |  | Bas B Oude Munnink; Cherise Beek; Consuelia Partowidjojo; Dion Gajadin; Ed PF IJzerman; Emmanuelle Mungeer; Gary Gummles; Ingrid SK Krishnadath; Lycke Woeitje; Marion KP Koopmans; Mireille Van de Veer; Phyllis Pinos; Princes Wongsowidjojo; Radjesh Ori; Ransha Doerbalie; Rohma Banwari; Soeradj Harkison; Stephen Vredren; Tilotmadhe Ramlal; Verne Nanhoo                                                                                                                                                                                                  |
| EPI_ISL_5687845, EPI_ISL_5736588, EPI_ISL_5736589                                                                                                                                                                                                                                                                                                                                                                                                                                                                                                                                                                                                                    | Centro di riferimento regionale per le emergenze microbiologiche (CRREM)           | Laboratory of Medical Microbiology, University of Antwerp                               |  | Basil Britto Xavier; Evelina Tacconelli; Maddalena Giannella; Mathias Smet; Matilda Berkeli; Surbhi Malhotra-Kumar                                                                                                                                                                                                                                                                                                                                                                                                                                                |
| EPI_ISL_5653028                                                                                                                                                                                                                                                                                                                                                                                                                                                                                                                                                                                                                                                      | Clinical Laboratory, Hospital Infantil de Mexico Federico Gomez.                   | Molecular Pathogenesis Research Laboratory, Hospital Infantil de Mexico Federico Gomez. |  | Diaz-García H.; Granados-Riveron J.T.; Moran-Espinosa M.C.; Parra-Ortega I.; Sanchez-Urbina R.                                                                                                                                                                                                                                                                                                                                                                                                                                                                    |
| EPI_ISL_5650807                                                                                                                                                                                                                                                                                                                                                                                                                                                                                                                                                                                                                                                      | DEPARTAMENTO DE SAUDE                                                              | Instituto Butantan                                                                      |  | Antonio Jorge Martins; Claudia Renata dos Santos Barros; David Schlesinger; Debora Botequiu Moretti; Dimas Tadeu Covas; Elaine Cristina Marqueze; Elaine Vieira Santos; Evandra Strazza Rodrigues; Heidge Fukumasu; Jayme Augusto de Souza-Neto; José Salvatore Leister Patané; Luiz Alcantara; Luiz Lehmann Coutinho; Maria Carolina Elias; Maurício Lacerda Nogueira; Rafael dos Santos Bezerra; Raul Machado Neto; Rejane Maria Tommasini Grotto; Ricardo Haddad; Sandra Coccuzzo Sampaio Vessoni; Simone Kashima; Svetoslav Nanev Slavov; Vincent Louis Viala |
| EPI_ISL_5647422, EPI_ISL_5651989, EPI_ISL_5651990, EPI_ISL_5652979, EPI_ISL_5653003, EPI_ISL_5653011, EPI_ISL_5653279, EPI_ISL_5653289, EPI_ISL_5653309, EPI_ISL_5653968, EPI_ISL_5669414, EPI_ISL_5669701, EPI_ISL_5669983, EPI_ISL_5670760, EPI_ISL_5671582, EPI_ISL_5671595, EPI_ISL_5671697, EPI_ISL_5671955, EPI_ISL_5676476                                                                                                                                                                                                                                                                                                                                    | DEPARTAMENTO DE SAUDE COLETIVA                                                     | Instituto Butantan                                                                      |  | Antonio Jorge Martins; Claudia Renata dos Santos Barros; David Schlesinger; Debora Botequiu Moretti; Dimas Tadeu Covas; Elaine Cristina Marqueze; Elaine Vieira Santos; Evandra Strazza Rodrigues; Heidge Fukumasu; Jayme Augusto de Souza-Neto; José Salvatore Leister Patané; Luiz Alcantara; Luiz Lehmann Coutinho; Maria Carolina Elias; Maurício Lacerda Nogueira; Rafael dos Santos Bezerra; Raul Machado Neto; Rejane Maria Tommasini Grotto; Ricardo Haddad; Sandra Coccuzzo Sampaio Vessoni; Simone Kashima; Svetoslav Nanev Slavov; Vincent Louis Viala |
| EPI_ISL_5646344, EPI_ISL_5647122, EPI_ISL_5647131, EPI_ISL_5647140, EPI_ISL_5647184, EPI_ISL_5647185, EPI_ISL_5648601, EPI_ISL_5648653, EPI_ISL_5650727, EPI_ISL_5650728, EPI_ISL_5650732, EPI_ISL_5650733, EPI_ISL_5650745, EPI_ISL_5650746, EPI_ISL_5650747                                                                                                                                                                                                                                                                                                                                                                                                        | DEPARTAMENTO DE SAUDE MUNICIPAL SOCORRO SP                                         | Instituto Butantan                                                                      |  | Antonio Jorge Martins; Claudia Renata dos Santos Barros; David Schlesinger; Debora Botequiu Moretti; Dimas Tadeu Covas; Elaine Cristina Marqueze; Elaine Vieira Santos; Evandra Strazza Rodrigues; Heidge Fukumasu; Jayme Augusto de Souza-Neto; José Salvatore Leister Patané; Luiz Alcantara; Luiz Lehmann Coutinho; Maria Carolina Elias; Maurício Lacerda Nogueira; Rafael dos Santos Bezerra; Raul Machado Neto; Rejane Maria Tommasini Grotto; Ricardo Haddad; Sandra Coccuzzo Sampaio Vessoni; Simone Kashima; Svetoslav Nanev Slavov; Vincent Louis Viala |
| EPI_ISL_5650235, EPI_ISL_5650243, EPI_ISL_5650246, EPI_ISL_5650354, EPI_ISL_5652686, EPI_ISL_5653202, EPI_ISL_5653217, EPI_ISL_5653274, EPI_ISL_5653352, EPI_ISL_5653361, EPI_ISL_5680978, EPI_ISL_5689109                                                                                                                                                                                                                                                                                                                                                                                                                                                           | DEPARTAMENTO MUNICIPAL DE SAUDE DE BURITAMA                                        | Instituto Butantan                                                                      |  | Antonio Jorge Martins; Claudia Renata dos Santos Barros; David Schlesinger; Debora Botequiu Moretti; Dimas Tadeu Covas; Elaine Cristina Marqueze; Elaine Vieira Santos; Evandra Strazza Rodrigues; Heidge Fukumasu; Jayme Augusto de Souza-Neto; José Salvatore Leister Patané; Luiz Alcantara; Luiz Lehmann Coutinho; Maria Carolina Elias; Maurício Lacerda Nogueira; Rafael dos Santos Bezerra; Raul Machado Neto; Rejane Maria Tommasini Grotto; Ricardo Haddad; Sandra Coccuzzo Sampaio Vessoni; Simone Kashima; Svetoslav Nanev Slavov; Vincent Louis Viala |
| EPI_ISL_5648573, EPI_ISL_5648667, EPI_ISL_5648668, EPI_ISL_5648913, EPI_ISL_5661869, EPI_ISL_5661982, EPI_ISL_5666262, EPI_ISL_5666297, EPI_ISL_5666359, EPI_ISL_5666577                                                                                                                                                                                                                                                                                                                                                                                                                                                                                             | DEPARTAMENTO MUNICIPAL DE SAUDE DE PARAGUACU PAULISTA                              | Instituto Butantan                                                                      |  | Antonio Jorge Martins; Claudia Renata dos Santos Barros; David Schlesinger; Debora Botequiu Moretti; Dimas Tadeu Covas; Elaine Cristina Marqueze; Elaine Vieira Santos; Evandra Strazza Rodrigues; Heidge Fukumasu; Jayme Augusto de Souza-Neto; José Salvatore Leister Patané; Luiz Alcantara; Luiz Lehmann Coutinho; Maria Carolina Elias; Maurício Lacerda Nogueira; Rafael dos Santos Bezerra; Raul Machado Neto; Rejane Maria Tommasini Grotto; Ricardo Haddad; Sandra Coccuzzo Sampaio Vessoni; Simone Kashima; Svetoslav Nanev Slavov; Vincent Louis Viala |
| EPI_ISL_5646537, EPI_ISL_5652989, EPI_ISL_5653888                                                                                                                                                                                                                                                                                                                                                                                                                                                                                                                                                                                                                    | DIRETORIA DE SAUDE                                                                 | Instituto Butantan                                                                      |  | Antonio Jorge Martins; Claudia Renata dos Santos Barros; David Schlesinger; Debora Botequiu Moretti; Dimas Tadeu Covas; Elaine Cristina Marqueze; Elaine Vieira Santos; Evandra Strazza Rodrigues; Heidge Fukumasu; Jayme Augusto de Souza-Neto; José Salvatore Leister Patané; Luiz Alcantara; Luiz Lehmann Coutinho; Maria Carolina Elias; Maurício Lacerda Nogueira; Rafael dos Santos Bezerra; Raul Machado Neto; Rejane Maria Tommasini Grotto; Ricardo Haddad; Sandra Coccuzzo Sampaio Vessoni; Simone Kashima; Svetoslav Nanev Slavov; Vincent Louis Viala |
| EPI_ISL_5646341, EPI_ISL_5648374, EPI_ISL_5648474, EPI_ISL_5650509, EPI_ISL_5651227, EPI_ISL_5651236, EPI_ISL_5652521, EPI_ISL_5652578, EPI_ISL_5652622, EPI_ISL_5652646, EPI_ISL_5652685                                                                                                                                                                                                                                                                                                                                                                                                                                                                            | DIRETORIA MUNICIPAL DE SAUDE                                                       | Instituto Butantan                                                                      |  | Antonio Jorge Martins; Claudia Renata dos Santos Barros; David Schlesinger; Debora Botequiu Moretti; Dimas Tadeu Covas; Elaine Cristina Marqueze; Elaine Vieira Santos; Evandra Strazza Rodrigues; Heidge Fukumasu; Jayme Augusto de Souza-Neto; José Salvatore Leister Patané; Luiz Alcantara; Luiz Lehmann Coutinho; Maria Carolina Elias; Maurício Lacerda Nogueira; Rafael dos Santos Bezerra; Raul Machado Neto; Rejane Maria Tommasini Grotto; Ricardo Haddad; Sandra Coccuzzo Sampaio Vessoni; Simone Kashima; Svetoslav Nanev Slavov; Vincent Louis Viala |
| EPI_ISL_5646531, EPI_ISL_5646657, EPI_ISL_5646658, EPI_ISL_5646659, EPI_ISL_5646717, EPI_ISL_5646718, EPI_ISL_5646759, EPI_ISL_5646794, EPI_ISL_5646824, EPI_ISL_5647167                                                                                                                                                                                                                                                                                                                                                                                                                                                                                             | DIRETORIA MUNICIPAL DE SAUDE DE ENGENHEIRO COELHO                                  | Instituto Butantan                                                                      |  | Antonio Jorge Martins; Claudia Renata dos Santos Barros; David Schlesinger; Debora Botequiu Moretti; Dimas Tadeu Covas; Elaine Cristina Marqueze; Elaine Vieira Santos; Evandra Strazza Rodrigues; Heidge Fukumasu; Jayme Augusto de Souza-Neto; José Salvatore Leister Patané; Luiz Alcantara; Luiz Lehmann Coutinho; Maria Carolina Elias; Maurício Lacerda Nogueira; Rafael dos Santos Bezerra; Raul Machado Neto; Rejane Maria Tommasini Grotto; Ricardo Haddad; Sandra Coccuzzo Sampaio Vessoni; Simone Kashima; Svetoslav Nanev Slavov; Vincent Louis Viala |
| EPI_ISL_5645429, EPI_ISL_5645514, EPI_ISL_5645517, EPI_ISL_5645518, EPI_ISL_5645522, EPI_ISL_5645523, EPI_ISL_5645524, EPI_ISL_5645525, EPI_ISL_5645526, EPI_ISL_5645527, EPI_ISL_5645529, EPI_ISL_5645533, EPI_ISL_5645534, EPI_ISL_5645536, EPI_ISL_5645537, EPI_ISL_5645538, EPI_ISL_5645546, EPI_ISL_5645547, EPI_ISL_5645549, EPI_ISL_5645550, EPI_ISL_5645551, EPI_ISL_5645560, EPI_ISL_5645561, EPI_ISL_5645562, EPI_ISL_5645567                                                                                                                                                                                                                              | Dirección Regional de Salud (DIRESA) Amazonas                                      | Instituto de Enfermedades Tropicales - UNTRM                                            |  | Alejandra Dávila Barclay; Carla Montenegro; Cecilia Pajuelo; Christian Campos; Diego Cuicaupuza; Guillermo Salvatierra; Luis Rojas; Pablo Tsukayama; Pedro E. Romero; Rafael Tapia; Stella Chenet                                                                                                                                                                                                                                                                                                                                                                 |
| EPI_ISL_5650190, EPI_ISL_5652181, EPI_ISL_5659586, EPI_ISL_5668123, EPI_ISL_5668347                                                                                                                                                                                                                                                                                                                                                                                                                                                                                                                                                                                  | E S F DR EDSON GIANETTO JD CARLOS CASSETARI                                        | Instituto Butantan                                                                      |  | Antonio Jorge Martins; Claudia Renata dos Santos Barros; David Schlesinger; Debora Botequiu Moretti; Dimas Tadeu Covas; Elaine Cristina Marqueze; Elaine Vieira Santos; Evandra Strazza Rodrigues; Heidge Fukumasu; Jayme Augusto de Souza-Neto; José Salvatore Leister Patané; Luiz Alcantara; Luiz Lehmann Coutinho; Maria Carolina Elias; Maurício Lacerda Nogueira; Rafael dos Santos Bezerra; Raul Machado Neto; Rejane Maria Tommasini Grotto; Ricardo Haddad; Sandra Coccuzzo Sampaio Vessoni; Simone Kashima; Svetoslav Nanev Slavov; Vincent Louis Viala |
| EPI_ISL_5646029, EPI_ISL_5646031, EPI_ISL_5647266, EPI_ISL_5647292, EPI_ISL_5647294, EPI_ISL_5648461, EPI_ISL_5648595, EPI_ISL_5651917, EPI_ISL_5651932, EPI_ISL_5651936, EPI_ISL_5651945, EPI_ISL_5651952, EPI_ISL_5651961, EPI_ISL_5652220, EPI_ISL_5652319, EPI_ISL_5652320, EPI_ISL_5652343, EPI_ISL_5652413, EPI_ISL_5652487, EPI_ISL_5673342, EPI_ISL_5673399, EPI_ISL_5673454, EPI_ISL_5673583, EPI_ISL_5673637, EPI_ISL_5673679, EPI_ISL_5673686, EPI_ISL_5674434, EPI_ISL_5675719, EPI_ISL_5675937, EPI_ISL_5678358, EPI_ISL_5678549, EPI_ISL_5678641, EPI_ISL_5678843, EPI_ISL_5678947, EPI_ISL_5679073, EPI_ISL_5679162, EPI_ISL_5679546, EPI_ISL_5679647 | EMERGENCIA RESPIRATORIA DE NOVA GRANADA                                            | Instituto Butantan                                                                      |  | Antonio Jorge Martins; Claudia Renata dos Santos Barros; David Schlesinger; Debora Botequiu Moretti; Dimas Tadeu Covas; Elaine Cristina Marqueze; Elaine Vieira Santos; Evandra Strazza Rodrigues; Heidge Fukumasu; Jayme Augusto de Souza-Neto; José Salvatore Leister Patané; Luiz Alcantara; Luiz Lehmann Coutinho; Maria Carolina Elias; Maurício Lacerda Nogueira; Rafael dos Santos Bezerra; Raul Machado Neto; Rejane Maria Tommasini Grotto; Ricardo Haddad; Sandra Coccuzzo Sampaio Vessoni; Simone Kashima; Svetoslav Nanev Slavov; Vincent Louis Viala |
| EPI_ISL_5662006                                                                                                                                                                                                                                                                                                                                                                                                                                                                                                                                                                                                                                                      | ESF BONFIM                                                                         | Instituto Butantan                                                                      |  | Antonio Jorge Martins; Claudia Renata dos Santos Barros; David Schlesinger; Debora Botequiu Moretti; Dimas Tadeu Covas; Elaine Cristina Marqueze; Elaine Vieira Santos; Evandra Strazza Rodrigues; Heidge Fukumasu; Jayme Augusto de Souza-Neto; José Salvatore Leister Patané; Luiz Alcantara; Luiz Lehmann Coutinho; Maria Carolina Elias; Maurício Lacerda Nogueira; Rafael dos Santos Bezerra; Raul Machado Neto; Rejane Maria Tommasini Grotto; Ricardo Haddad; Sandra Coccuzzo Sampaio Vessoni; Simone Kashima; Svetoslav Nanev Slavov; Vincent Louis Viala |
| EPI_ISL_5689106                                                                                                                                                                                                                                                                                                                                                                                                                                                                                                                                                                                                                                                      | ESF CENTRO IV SANTA FE DO SUL                                                      | Instituto Butantan                                                                      |  | Antonio Jorge Martins; Claudia Renata dos Santos Barros; David Schlesinger; Debora Botequiu Moretti; Dimas Tadeu Covas; Elaine Cristina Marqueze; Elaine Vieira Santos; Evandra Strazza Rodrigues; Heidge Fukumasu; Jayme Augusto de Souza-Neto; José Salvatore Leister Patané; Luiz Alcantara; Luiz Lehmann Coutinho; Maria Carolina Elias; Maurício Lacerda Nogueira; Rafael dos Santos Bezerra; Raul Machado Neto; Rejane Maria Tommasini Grotto; Ricardo Haddad; Sandra Coccuzzo Sampaio Vessoni; Simone Kashima; Svetoslav Nanev Slavov; Vincent Louis Viala |
| EPI_ISL_5648489, EPI_ISL_5648690, EPI_ISL_5648725                                                                                                                                                                                                                                                                                                                                                                                                                                                                                                                                                                                                                    | ESF COHAB IV                                                                       | Instituto Butantan                                                                      |  | Antonio Jorge Martins; Claudia Renata dos Santos Barros; David Schlesinger; Debora Botequiu Moretti; Dimas Tadeu Covas; Elaine Cristina Marqueze; Elaine Vieira Santos; Evandra Strazza Rodrigues; Heidge Fukumasu; Jayme Augusto de Souza-Neto; José Salvatore Leister Patané; Luiz Alcantara; Luiz Lehmann Coutinho; Maria Carolina Elias; Maurício Lacerda Nogueira; Rafael dos Santos Bezerra; Raul Machado Neto; Rejane Maria Tommasini Grotto; Ricardo Haddad; Sandra Coccuzzo Sampaio Vessoni; Simone Kashima; Svetoslav Nanev Slavov; Vincent Louis Viala |
| EPI_ISL_5653281                                                                                                                                                                                                                                                                                                                                                                                                                                                                                                                                                                                                                                                      | ESF DR LUIS ERNESTO SANDI MORI JALES                                               | Instituto Butantan                                                                      |  | Antonio Jorge Martins; Claudia Renata dos Santos Barros; David Schlesinger; Debora Botequiu Moretti; Dimas Tadeu Covas; Elaine Cristina Marqueze; Elaine Vieira Santos; Evandra Strazza Rodrigues; Heidge Fukumasu; Jayme Augusto de Souza-Neto; José Salvatore Leister Patané; Luiz Alcantara; Luiz Lehmann Coutinho; Maria Carolina Elias; Maurício Lacerda Nogueira; Rafael dos Santos Bezerra; Raul Machado Neto; Rejane Maria Tommasini Grotto; Ricardo Haddad; Sandra Coccuzzo Sampaio Vessoni; Simone Kashima; Svetoslav Nanev Slavov; Vincent Louis Viala |
| EPI_ISL_5653418, EPI_ISL_5653458, EPI_ISL_5653467                                                                                                                                                                                                                                                                                                                                                                                                                                                                                                                                                                                                                    | ESF M1 DR FRANCISCO XAVIER REGO JALES                                              | Instituto Butantan                                                                      |  | Antonio Jorge Martins; Claudia Renata dos Santos Barros; David Schlesinger; Debora Botequiu Moretti; Dimas Tadeu Covas; Elaine Cristina Marqueze; Elaine Vieira Santos; Evandra Strazza Rodrigues; Heidge Fukumasu; Jayme Augusto de Souza-Neto; José Salvatore Leister Patané; Luiz Alcantara; Luiz Lehmann Coutinho; Maria Carolina Elias; Maurício Lacerda Nogueira; Rafael dos Santos Bezerra; Raul Machado Neto; Rejane Maria Tommasini Grotto; Ricardo Haddad; Sandra Coccuzzo Sampaio Vessoni; Simone Kashima; Svetoslav Nanev Slavov; Vincent Louis Viala |
| EPI_ISL_5653377, EPI_ISL_5653408, EPI_ISL_5653417                                                                                                                                                                                                                                                                                                                                                                                                                                                                                                                                                                                                                    | ESF M1 OZIL JOAQUIM REZENDE JALES                                                  | Instituto Butantan                                                                      |  | Antonio Jorge Martins; Claudia Renata dos Santos Barros; David Schlesinger; Debora Botequiu Moretti; Dimas Tadeu Covas; Elaine Cristina Marqueze; Elaine Vieira Santos; Evandra Strazza Rodrigues; Heidge Fukumasu; Jayme Augusto de Souza-Neto; José Salvatore Leister Patané; Luiz Alcantara; Luiz Lehmann Coutinho; Maria Carolina Elias; Maurício Lacerda Nogueira; Rafael dos Santos Bezerra; Raul Machado Neto; Rejane Maria Tommasini Grotto; Ricardo Haddad; Sandra Coccuzzo Sampaio Vessoni; Simone Kashima; Svetoslav Nanev Slavov; Vincent Louis Viala |
| EPI_ISL_5653245, EPI_ISL_5653266                                                                                                                                                                                                                                                                                                                                                                                                                                                                                                                                                                                                                                     | ESF M1 UNI AMERICA DE JALES                                                        | Instituto Butantan                                                                      |  | Antonio Jorge Martins; Claudia Renata dos Santos Barros; David Schlesinger; Debora Botequiu Moretti; Dimas Tadeu Covas; Elaine Cristina Marqueze; Elaine Vieira Santos; Evandra Strazza Rodrigues; Heidge Fukumasu; Jayme Augusto de Souza-Neto; José Salvatore Leister Patané; Luiz Alcantara; Luiz Lehmann Coutinho; Maria Carolina Elias; Maurício Lacerda Nogueira; Rafael dos Santos Bezerra; Raul Machado Neto; Rejane Maria Tommasini Grotto; Ricardo Haddad; Sandra Coccuzzo Sampaio Vessoni; Simone Kashima; Svetoslav Nanev Slavov; Vincent Louis Viala |
| EPI_ISL_5653517, EPI_ISL_5653524                                                                                                                                                                                                                                                                                                                                                                                                                                                                                                                                                                                                                                     | ESF MINEIROS DO TIETE                                                              | Instituto Butantan                                                                      |  | Antonio Jorge Martins; Claudia Renata dos Santos Barros; David Schlesinger; Debora Botequiu Moretti; Dimas Tadeu Covas; Elaine Cristina Marqueze; Elaine Vieira Santos; Evandra Strazza Rodrigues; Heidge Fukumasu; Jayme Augusto de                                                                                                                                                                                                                                                                                                                              |
